# Supplementary material for: High Mitochondrial Protein Expression as a Potential Predictor of Relapse Risk in Acute Myeloid Leukemia Patients with the Monocytic FAB subtypes M4 and M5
Source: Preprints.org preprint supplement (doi:10.20944/preprints202310.1628.v1), 2023-10-25
Supplement: Supplementary file 2 [file Supplementary file 1_Proteomics data REL_M1_M2_ and REL_M4_M5 subgroups.xlsx]

## Sheet: Details
Details:
Datasheet "Protein expression" contains MS proteomic data from each patients (row 1 and 2 of datasheet "Protein expression") and AML disease subgroups: 12 REL_M4/5_all, 7 REL_M4/5_CN, 8 REL_M1/2_all and 5 REL_M4/5_mut. CN refers to normal cytogenetics and mut to NPM1 Ins mutation. It shows proteomics data after selecting at least 3 quantified proteins (valid values, VV) in each group. ANOVA P-val…
Patient number with no sufix, with sufix _1 and sufix_2 indicates a patient that is found in the non-stratified subgroups, in the CN-stratified subgroups and in the mut-stratified subgroups, respectively
Datasheet "Significant proteins (HSD)" contains significantly different protein pairs after applying post hoc Turkey’s Honest Significance Difference (HSD) test with FDR < 0.05 on the significant findings of the ANOVA multiple sample test
RELAPSE alone refers to RELAPSE_M4M5

## Sheet: Protein expression
P11	P17	P18	P2	P22	P23	P34	P37	P45	P50	P51	P52	P18_1	P2_1	P22_1	P23_1	P34_1	P45_1	P50_1	P12	P19	P32	P40	P48	P5	P6	P9	P18_2	P2_2	P23_2	P34_2	P51_2	GOBP name	GOMF name	GOCC name	KEGG name	ANOVA Significant	Peptides	Razor + unique peptides	Unique peptides	Sequence coverage [%]	Unique + razor sequence coverage [%]	Unique sequence coverage [%]	Mol. weight [kDa]	Q-value	Score	Intensity	Intensity L	Intensity H	ANOVA P value
REL_M4/5_all	REL_M4/5_all	REL_M4/5_all	REL_M4/5_all	REL_M4/5_all	REL_M4/5_all	REL_M4/5_all	REL_M4/5_all	REL_M4/5_all	REL_M4/5_all	REL_M4/5_all	REL_M4/5_all	REL_M4/5_CN	REL_M4/5_CN	REL_M4/5_CN	REL_M4/5_CN	REL_M4/5_CN	REL_M4/5_CN	REL_M4/5_CN	REL_M1/2_all	REL_M1/2_all	REL_M1/2_all	REL_M1/2_all	REL_M1/2_all	REL_M1/2_all	REL_M1/2_all	REL_M1/2_all	REL_M4/5_mut	REL_M4/5_mut	REL_M4/5_mut	REL_M4/5_mut	REL_M4/5_mut
0.891306	0.139536	-1.02468	-1.13429	0.769189	-0.427258	0.64545	0.612173	-0.730918	-0.328768	-0.214207	0.395103	-1.03279	-1.14326	0.843139	-0.43064	0.707503	-0.736702	-0.33137	0.778924	0.338928	0.100414	0.0341891	-0.599759	0.217468	-1.11684	0.529502	-1.05793	-1.1711	-0.441124	0.721508	-0.221159	catabolic process;cellular catabolic process;cellular macromolecule catabolic process;cellular macromolecule metabolic process;cellular metabolic process;cellular process;cellular protein metabolic process;macromolecule catabolic process;macromolecule metabolic process;macromolecule modification;metabolic process;modification-dependent macromolecule catabolic process;modification-dependent protei…	adenyl nucleotide binding;adenyl ribonucleotide binding;ATP binding;binding;catalytic activity;FAT10 activating enzyme activity;nucleotide binding;purine nucleotide binding;purine ribonucleoside triphosphate binding;purine ribonucleotide binding;ribonucleotide binding;small protein activating enzyme activity	cell part;cytoplasm;cytoplasmic part;cytosol;intracellular part	Ubiquitin mediated proteolysis		37	37	37	49	49	49	117.97	0	323.31	11509000000	7493100000	4015800000	0.370034
0.320257	0.747327	0.493726	0.683537	-0.672542	1.08226	-0.499314	0.64087	0.588682	0.84776	0.903469	-0.0481198	0.541193	0.749252	-0.677865	1.1863	-0.503266	0.645279	0.929263	0.385375	0.417476	0.735212	1.14486	0.32664	0.652398	0.499061	0.550708	0.551905	0.764083	1.20979	-0.515518	1.00993	cellular component organization;cellular component organization or biogenesis;cellular membrane organization;cellular process;endocytosis;establishment of localization;lipid transport;membrane invagination;membrane organization;organic substance transport;transport;vesicle-mediated transport	alcohol binding;amine binding;binding;calcium ion binding;calcium-dependent phospholipid binding;cation binding;identical protein binding;ion binding;lipid binding;metal ion binding;phosphatidylcholine binding;phosphatidylethanolamine binding;phosphatidylinositol binding;phospholipid binding;protein binding;quaternary ammonium group binding	cell part;cytoplasmic part;endoplasmic reticulum part;extrinsic to internal side of plasma membrane;extrinsic to membrane;extrinsic to plasma membrane;integral to membrane;integral to plasma membrane;intracellular organelle part;intracellular part;intrinsic to endoplasmic reticulum membrane;intrinsic to membrane;intrinsic to organelle membrane;intrinsic to plasma membrane;membrane;membrane part;o…			44	43	2	59	58.3	4.1	98.9	0	323.31	48540000000	35024000000	13516000000	0.786581
0.179014	-0.161124	0.515396	NaN	-0.26471	NaN	-0.199911	-0.27173	0.357562	0.530922	0.56724	NaN	0.564946	NaN	-0.266804	NaN	-0.201493	0.391938	0.581965	0.0452089	-0.320606	1.00172	0.840394	0.64756	0.295854	NaN	-0.0218358	0.576128	NaN	NaN	-0.206398	0.634082		protein binding transcription factor activity;RNA polymerase II transcription cofactor activity;RNA polymerase II transcription factor binding transcription factor activity;transcription cofactor activity;transcription factor binding transcription factor activity	cell part;intracellular membrane-bounded organelle;intracellular organelle;intracellular organelle part;intracellular part;macromolecular complex;mediator complex;membrane-bounded organelle;nuclear part;nucleoplasm part;nucleus;organelle;organelle part;protein complex			3	3	1	24.2	24.2	9	26.273	0	188.95	634280000	416510000	217770000	0.546078
-0.221854	0.158708	0.577377	0.485458	-0.144443	0.440896	-0.115953	-0.217045	0.200835	0.381847	0.400715	0.194	0.632886	0.53213	-0.145586	0.483284	-0.11687	0.220143	0.418558	-0.133866	-0.30265	0.463687	0.364882	-0.343653	0.12199	0.272629	-0.263312	0.645413	0.542663	0.49285	-0.119715	0.447934		binding;catalytic activity;cation binding;coenzyme binding;cofactor binding;ion binding;magnesium ion binding;metal ion binding;thiamine pyrophosphate binding;transferase activity;vitamin binding	cell part;integral to membrane;intrinsic to membrane;membrane;membrane part			19	19	19	46.5	46.5	46.5	67.867	0	257.32	7800900000	4560100000	3240800000	0.100106
0.430681	0.633264	1.17374	0.89986	0.100389	1.02634	0.52755	0.516838	0.900586	0.886575	1.12091	0.344419	1.28658	0.986372	0.110041	1.12502	0.578268	0.987168	0.97181	0.614012	0.550326	1.13117	0.879754	0.225675	0.975914	0.766598	0.620851	1.31204	1.0059	1.14728	0.589715	1.253	biological regulation;catabolic process;cellular catabolic process;cellular macromolecule catabolic process;cellular macromolecule metabolic process;cellular metabolic process;cellular nitrogen compound metabolic process;cellular process;establishment of localization;establishment of localization in cell;Golgi vesicle transport;intracellular transport;macromolecule catabolic process;macromolecule…		cell part;cytoplasm;cytoplasmic part;Golgi apparatus;intracellular membrane-bounded organelle;intracellular non-membrane-bounded organelle;intracellular organelle;intracellular organelle part;intracellular part;membrane;membrane-bounded organelle;non-membrane-bounded organelle;nuclear membrane;nuclear part;nucleolus;organelle;organelle membrane;organelle part			46	46	46	25.8	25.8	25.8	268.57	0	254.17	5911900000	4207400000	1704500000	0.0516988
0.216759	0.743545	-0.537859	-0.597082	-0.43184	-0.778597	-0.133883	-0.371256	0.217378	-0.321908	0.112089	0.354037	-0.542116	-0.601807	-0.435257	-0.784759	-0.134943	0.238277	-0.324456	-0.897319	0.278696	-1.70448	-0.893147	-0.888921	-0.365833	-1.45309	-0.67011	-0.555314	-0.616458	-0.803864	-0.138228	0.125297	biological regulation;catabolic process;cellular catabolic process;cellular macromolecule catabolic process;cellular macromolecule metabolic process;cellular metabolic process;cellular process;cellular protein catabolic process;cellular protein metabolic process;endosome to lysosome transport;endosome transport;establishment of localization;establishment of localization in cell;intracellular tran…	enzyme regulator activity;GTPase regulator activity;guanyl-nucleotide exchange factor activity;nucleoside-triphosphatase regulator activity;Rab guanyl-nucleotide exchange factor activity;Ras guanyl-nucleotide exchange factor activity;small GTPase regulator activity			+	16	16	16	21.1	21.1	21.1	129.81	0	73.135	1683600000	1047100000	636460000	0.00657874
0.381593	1.03172	1.21562	0.947986	0.200472	0.7823	0.172352	0.30784	0.780137	0.374634	0.904287	0.229865	1.33249	1.03912	0.219746	0.857511	0.188922	0.855139	0.410651	0.276995	0.0221689	1.25364	1.59471	0.894725	1.37076	0.0620242	1.18022	1.35887	1.05969	0.874484	0.192661	1.01085		adenyl nucleotide binding;adenyl ribonucleotide binding;ATP binding;ATPase activity;binding;catalytic activity;hydrolase activity;hydrolase activity, acting on acid anhydrides;hydrolase activity, acting on acid anhydrides, in phosphorus-containing anhydrides;nucleoside-triphosphatase activity;nucleotide binding;purine nucleotide binding;purine ribonucleoside triphosphate binding;purine ribonucleo…	cell part;cytoplasmic part;extracellular region;intracellular membrane-bounded organelle;intracellular organelle;intracellular part;membrane-bounded organelle;mitochondrion;organelle			42	42	42	28.4	28.4	28.4	210.92	0	168.54	1372000000	964380000	407640000	0.452283
-0.843518	-1.09055	-0.822697	-0.976085	-1.11513	-0.654297	-0.953201	-0.880316	-0.851273	-0.90422	-0.696436	-0.636809	-0.829208	-0.98381	-1.12396	-0.659475	-0.960745	-0.85801	-0.911375	-0.608987	-1.08109	-0.840854	-0.828389	-1.13775	-0.597659	-0.565164	-0.730493	-0.849395	-1.00776	-0.67553	-0.984134	-0.719036	biological regulation;regulation of biological process;regulation of biosynthetic process;regulation of cellular biosynthetic process;regulation of cellular macromolecule biosynthetic process;regulation of cellular metabolic process;regulation of cellular process;regulation of gene expression;regulation of macromolecule biosynthetic process;regulation of macromolecule metabolic process;regulation…					29	29	25	33	33	29.4	154.06	0	155.01	2286800000	1155800000	1130900000	0.797359
NaN	0.026792	0.446285	NaN	NaN	-0.882522	NaN	-0.174218	-0.30573	-0.869215	-0.288982	NaN	0.489191	NaN	NaN	-0.889506	NaN	-0.308149	-0.876093	-0.300926	-0.495293	0.283126	0.626516	0.0462517	-0.156401	0.0673456	0.364515	0.498874	NaN	-0.911161	NaN	-0.29836	cellular component biogenesis;cellular component biogenesis at cellular level;cellular component organization or biogenesis;cellular component organization or biogenesis at cellular level;cellular process;ribonucleoprotein complex biogenesis;ribosome biogenesis	binding;catalytic activity;cation binding;GTP binding;GTPase activity;guanyl nucleotide binding;guanyl ribonucleotide binding;hydrolase activity;hydrolase activity, acting on acid anhydrides;hydrolase activity, acting on acid anhydrides, in phosphorus-containing anhydrides;ion binding;magnesium ion binding;metal ion binding;nucleoside-triphosphatase activity;nucleotide binding;purine nucleotide b…	cell part;chromosome;cytoplasmic part;intracellular membrane-bounded organelle;intracellular non-membrane-bounded organelle;intracellular organelle;intracellular organelle part;intracellular part;membrane-bounded organelle;mitochondrion;non-membrane-bounded organelle;nuclear part;nucleolus;organelle;organelle part			8	8	8	25.8	25.8	25.8	42.932	0	20.772	289920000	168880000	121040000	0.544626
0.382268	0.408272	0.381317	1.31676	0.27661	-0.245317	0.807036	0.107464	0.965155	0.332898	0.1196	1.00914	0.417977	1.44335	0.303203	-0.247258	0.884625	1.05795	0.364903	-0.232353	0.968225	0.21667	0.625877	0.532308	-0.303539	0.928601	0.262419	0.426251	1.47192	-0.253278	0.902135	0.133694						23	23	23	35.5	35.5	35.5	83.343	0	101.31	3255200000	2155400000	1099900000	0.931253
0.655295	0.306464	-0.997993	-0.365586	0.586202	NaN	0.362427	0.126206	0.577979	0.609063	0.757151	0.810476	-1.00589	-0.368479	0.64256	NaN	0.397271	0.633545	0.667619	-0.115072	0.232512	0.014551	-0.294515	-0.365805	-0.208653	-0.576643	0.133268	-1.03038	-0.37745	NaN	0.405135	0.846371						6	6	6	22.4	22.4	22.4	45.934	0	43.913	21629000000	13019000000	8610900000	0.192199
-0.473494	-0.234255	0.0301751	0.142552	-0.401066	-0.298137	-0.37053	-0.429961	-0.283492	-0.238384	-0.106387	-0.241342	0.0330761	0.156257	-0.40424	-0.300497	-0.373462	-0.285736	-0.24027	-0.539276	-0.304291	0.0790114	-0.0442252	0.162395	-0.643689	-0.0205248	-0.340368	0.0337308	0.15935	-0.307812	-0.382554	-0.109839	biological regulation;biosynthetic process;catabolic process;cellular biosynthetic process;cellular catabolic process;cellular macromolecule biosynthetic process;cellular macromolecule catabolic process;cellular macromolecule metabolic process;cellular metabolic process;cellular nitrogen compound metabolic process;cellular process;developmental process;gene expression;gene silencing;gene silencin…	armadillo repeat domain binding;binding;estrogen receptor binding;hormone receptor binding;nuclear hormone receptor binding;protein binding;protein complex scaffold;protein domain specific binding;receptor binding;retinoic acid receptor binding;steroid hormone receptor binding;structural molecule activity;transcription factor binding	CCR4-NOT complex;cell part;cytoplasmic mRNA processing body;cytoplasmic part;cytosol;extracellular region part;extracellular space;intracellular membrane-bounded organelle;intracellular non-membrane-bounded organelle;intracellular organelle;intracellular organelle part;intracellular part;macromolecular complex;membrane;membrane-bounded organelle;microbody;microbody membrane;microbody part;non-mem…	RNA degradation		77	77	77	39.4	39.4	39.4	266.94	0	323.31	21503000000	12065000000	9438400000	0.649152
0.690233	-0.962961	-0.786586	-0.562397	1.37566	0.572602	0.97404	0.265643	1.51981	1.14748	0.450241	1.47476	-0.792811	-0.566848	1.50792	0.627652	1.06768	1.66593	1.2578	0.049502	0.718962	-0.975969	NaN	0.281065	-0.446771	-0.549246	0.14614	-0.812112	-0.580648	0.640075	1.08882	0.503296			cell part;membrane			35	35	35	30.2	30.2	30.2	164.81	0	207.5	1157800000	845340000	312500000	0.350033
-0.295989	-0.262888	-0.110382	-0.598725	-0.833669	-0.107202	-0.36138	-0.540728	NaN	-0.494745	-1.01213	NaN	-0.111256	-0.603463	-0.840266	-0.108051	-0.36424	NaN	-0.498661	-0.55282	-0.237545	-0.279067	-0.355941	NaN	-0.716483	-0.795858	-1.26472	-0.113964	-0.618154	-0.110681	-0.373108	-1.04497	autophagic vacuole assembly;autophagy;catabolic process;cell communication;cellular catabolic process;cellular component assembly;cellular component assembly at cellular level;cellular component organization;cellular component organization at cellular level;cellular component organization or biogenesis;cellular component organization or biogenesis at cellular level;cellular metabolic process;cell…	binding;cytoskeletal protein binding;microtubule binding;protein binding;tubulin binding	autophagic vacuole;autophagic vacuole membrane;axoneme;cell part;cell projection part;cytoplasmic part;cytoplasmic vesicle;cytoskeletal part;cytosol;endomembrane system;extrinsic to membrane;intracellular;intracellular membrane-bounded organelle;intracellular organelle;intracellular organelle part;intracellular part;macromolecular complex;membrane;membrane part;membrane-bounded organelle;microtub…			2	2	1	16.8	16.8	11.2	14.688	0	5.7359	736960000	430300000	306660000	0.858708
-0.676213	-1.5923	-1.69181	-1.98469	-0.34295	-2.4379	-0.632663	-1.4722	-1.38785	-1.65653	-1.68265	-0.775624	-1.70519	-2.0004	-0.345664	-2.45719	-0.63767	-1.39883	-1.66964	-1.30357	-1.47721	-1.64898	-1.24888	-1.72076	-1.88884	-1.4497	-1.14912	-1.74671	-2.0491	-2.51701	-0.653194	-1.73725	carbohydrate metabolic process;cellular macromolecule metabolic process;cellular metabolic process;cellular process;cellular protein metabolic process;dephosphorylation;macromolecule metabolic process;macromolecule modification;metabolic process;peptidyl-tyrosine dephosphorylation;phosphate-containing compound metabolic process;phosphorus metabolic process;primary metabolic process;protein dephos…	binding;catalytic activity;cation binding;hydrolase activity;hydrolase activity, acting on ester bonds;ion binding;magnesium ion binding;metal ion binding;phosphatase activity;phosphoglycolate phosphatase activity;phosphoprotein phosphatase activity;phosphoric ester hydrolase activity;protein tyrosine phosphatase activity		Glyoxylate and dicarboxylate metabolism		15	15	15	60.7	60.7	60.7	34.006	0	156.53	3881900000	1841800000	2040000000	0.261912
0.150127	-0.0920497	-1.88976	-2.02328	-0.107044	-1.02559	-0.253734	-0.347919	-1.59243	-1.19891	-1.2244	-0.605078	-1.90471	-2.03929	-0.107891	-1.03371	-0.255742	-1.60504	-1.2084	-0.116735	-0.767651	-1.02731	-0.839029	-2.05034	-0.697345	NaN	0.0435763	-1.95108	-2.08894	-1.05887	-0.261968	-1.26413						6	6	6	31.3	31.3	31.3	33.62	0	33.11	1054700000	547600000	507120000	0.225866
-0.240898	0.640345	0.943356	0.894915	-0.0817608	0.118402	-0.228375	-0.12117	0.497158	0.489445	NaN	0.290597	1.03405	0.980953	-0.0824079	0.129785	-0.230183	0.544955	0.5365	NaN	NaN	2.14134	1.08871	1.16039	1.11185	1.07683	0.715473	1.05452	1.00037	0.132354	-0.235786	NaN	cellular macromolecule metabolic process;cellular metabolic process;cellular nitrogen compound metabolic process;cellular process;macromolecule metabolic process;metabolic process;ncRNA metabolic process;ncRNA processing;nitrogen compound metabolic process;nucleic acid metabolic process;nucleobase-containing compound metabolic process;primary metabolic process;RNA metabolic process;RNA processing…	binding;catalytic activity;methyltransferase activity;nucleic acid binding;RNA binding;transferase activity;transferase activity, transferring one-carbon groups	cell part;intracellular non-membrane-bounded organelle;intracellular organelle;intracellular organelle part;intracellular part;macromolecular complex;non-membrane-bounded organelle;nuclear part;nucleolus;organelle;organelle part;ribonucleoprotein complex		+	2	1	1	6.6	3.3	3.3	34.803	0.0002656	3.2789	6147700000	4444500000	1703200000	0.00383575
0.601636	-0.122616	0.473426	0.71898	0.40968	1.02351	0.267828	0.767098	1.20101	0.52366	0.778442	0.697784	0.518941	0.788103	0.449067	1.12191	0.293577	1.31648	0.574005	0.780655	0.844276	0.861359	0.748386	0.818233	0.833225	0.586487	0.267533	0.529213	0.803703	1.14411	0.299388	0.870172	biological regulation;cellular component organization;cellular component organization at cellular level;cellular component organization or biogenesis;cellular component organization or biogenesis at cellular level;cellular process;chromosome organization;dosage compensation;dosage compensation, by inactivation of X chromosome;inactivation of X chromosome by DNA methylation;organelle organization;…	adenyl nucleotide binding;adenyl ribonucleotide binding;ATP binding;binding;nucleotide binding;purine nucleotide binding;purine ribonucleoside triphosphate binding;purine ribonucleotide binding;ribonucleotide binding	Barr body;cell part;chromosome;intracellular non-membrane-bounded organelle;intracellular organelle;intracellular organelle part;intracellular part;non-membrane-bounded organelle;nuclear chromosome;nuclear part;organelle;organelle part;sex chromosome;X chromosome			86	86	86	55.8	55.8	55.8	226.37	0	323.31	25382000000	17606000000	7776300000	0.838605
1.2661	NaN	NaN	NaN	0.893693	1.19056	1.40757	1.19773	NaN	0.34754	0.575936	1.09515	NaN	NaN	0.979613	1.30502	1.54289	NaN	0.380952	0.231697	NaN	NaN	NaN	NaN	0.507864	NaN	-0.45376	NaN	NaN	1.33086	1.57343	0.643803					+	5	5	5	25.7	25.7	25.7	33.803	0	17.353	257510000	185490000	72020000	0.0217759
-0.244818	-0.464908	-0.295144	NaN	-0.234245	1.21581	-0.480269	-0.55955	NaN	-0.402971	-0.175667	NaN	-0.29748	NaN	-0.236099	1.3327	-0.48407	NaN	-0.40616	-0.219981	-1.72264	-0.147516	0.227364	0.552241	-0.412095	0.307338	-0.54008	-0.304722	NaN	1.35908	-0.495855	-0.181368	establishment of localization;establishment of protein localization;establishment of RNA localization;mRNA transport;nucleic acid transport;nucleobase-containing compound transport;protein transport;RNA transport;transport		cell part;cytoplasmic part;endoplasmic reticulum membrane;endoplasmic reticulum part;intracellular organelle part;intracellular part;macromolecular complex;membrane;membrane part;nuclear membrane;nuclear part;nuclear pore;organelle membrane;organelle part;pore complex;protein complex			18	18	4	20.7	20.7	6.2	125.06	0	114.98	1279700000	498650000	781040000	0.850586
-0.456835	-0.514361	-0.0292786	0.129961	-0.385307	-0.242463	-0.485317	0.0360799	0.304995	-0.231473	-0.46414	0.4443	-0.0295103	0.142455	-0.388356	-0.244382	-0.489158	0.334318	-0.233305	-0.0340418	0.249354	-0.610766	-0.0811204	1.08549	0.0713199	-0.855445	-0.57758	-0.0302287	0.145275	-0.250332	-0.501066	-0.479202		binding;catalytic activity;cation binding;hydrolase activity;ion binding;metal ion binding;protein binding;receptor binding	cell part;cytoplasmic part;intracellular membrane-bounded organelle;intracellular organelle;intracellular part;membrane-bounded organelle;microbody;mitochondrion;organelle;peroxisome	Peroxisome		9	9	9	39.2	39.2	39.2	42.233	0	57.969	2322000000	1415000000	907030000	0.976764
-0.0813348	-0.821617	0.149674	0.253521	0.29768	-0.159584	-0.0472125	-0.263906	0.547301	0.46675	-0.0310251	-0.0116593	0.164064	0.277894	0.326299	-0.160847	-0.0475861	0.599918	0.511623	0.0492121	0.362165	0.501659	0.588691	-0.238714	-0.3508	-0.241633	-0.367587	0.167312	0.283395	-0.164762	-0.0487446	-0.0320319	adaptive immune response;adaptive immune response based on somatic recombination of immune receptors built from immunoglobulin superfamily domains;biological adhesion;cell adhesion;cell gliding;cell migration;cell motility;cell-substrate adhesion;cellular component movement;cellular process;establishment of localization;establishment of localization in cell;exocytosis;immune effector process;immu…	adenyl nucleotide binding;adenyl ribonucleotide binding;ATP binding;binding;catalytic activity;hydrolase activity;hydrolase activity, acting on acid anhydrides;hydrolase activity, acting on acid anhydrides, in phosphorus-containing anhydrides;lipid binding;motor activity;nucleoside-triphosphatase activity;nucleotide binding;phosphatidylinositol binding;phosphatidylinositol-3,4,5-trisphosphate bin…	cell part;cell projection;cytoskeletal part;extracellular membrane-bounded organelle;extracellular organelle;extracellular region part;extracellular vesicular exosome;filopodium;intracellular organelle part;intracellular part;lamellipodium;leading edge membrane;macromolecular complex;membrane;membrane part;membrane-bounded organelle;membrane-bounded vesicle;microvillus;myosin complex;organelle;or…			55	55	52	63.7	63.7	63.7	116.44	0	323.31	74499000000	48881000000	25619000000	0.648438
-1.36417	-0.103868	0.480858	0.52629	NaN	-0.19725	NaN	-1.19299	NaN	-0.0335346	-0.241724	-0.257501	0.527088	0.576888	NaN	-0.198811	NaN	NaN	-0.0338	NaN	NaN	0.133467	0.521172	0.674946	-0.472898	0.821775	-1.36311	0.537521	0.588307	-0.203651	NaN	-0.249568	biological regulation;cation homeostasis;cellular cation homeostasis;cellular chemical homeostasis;cellular homeostasis;cellular ion homeostasis;cellular monovalent inorganic cation homeostasis;cellular process;cellular response to stimulus;chemical homeostasis;establishment of localization;establishment of protein localization;homeostatic process;intracellular pH reduction;ion homeostasis;monova…	anion channel activity;anion transmembrane transporter activity;channel activity;gated channel activity;ion channel activity;ion transmembrane transporter activity;molecular transducer activity;passive transmembrane transporter activity;signal transducer activity;substrate-specific channel activity;substrate-specific transmembrane transporter activity;substrate-specific transporter activity;trans…	cell part;cytoplasmic part;cytoplasmic vesicle membrane;cytoplasmic vesicle part;Golgi apparatus part;Golgi cisterna membrane;Golgi membrane;Golgi-associated vesicle membrane;integral to membrane;intracellular organelle part;intracellular part;intrinsic to membrane;membrane;membrane part;organelle membrane;organelle part;vesicle membrane			5	5	5	22.4	22.4	22.4	38.484	0	25.734	794450000	464600000	329850000	0.248603
0.638101	0.342215	0.734473	1.02715	0.535992	0.0543032	0.871082	0.813596	0.624796	1.15212	1.12041	0.584282	0.805085	1.1259	0.587522	0.0595239	0.954828	0.684864	1.26288	0.186262	0.689537	0.353775	1.10536	0.45616	0.567237	0.760023	0.771346	0.821021	1.14819	0.0607021	0.973728	1.25244	actin cytoskeleton organization;actin filament organization;actin filament-based process;actin nucleation;Arp2/3 complex-mediated actin nucleation;biological regulation;cellular component disassembly;cellular component disassembly at cellular level;cellular component organization;cellular component organization at cellular level;cellular component organization or biogenesis;cellular component org…	alpha-tubulin binding;binding;cytoskeletal protein binding;enzyme binding;protein binding;tubulin binding;ubiquitin protein ligase binding	autophagic vacuole;cell part;cell projection;centriole;cytoplasmic part;cytoplasmic vesicle;cytoskeletal part;early endosome;early endosome membrane;endosomal part;endosome;endosome membrane;filopodium;intracellular membrane-bounded organelle;intracellular non-membrane-bounded organelle;intracellular organelle;intracellular organelle part;intracellular part;invadopodium;lamellipodium;late endosom…			13	13	7	31.5	31.5	17.1	49.994	0	90.091	1778900000	1272200000	506710000	0.55183
-0.23902	-1.02654	-1.11418	-1.28726	-0.427853	-1.14897	-0.791222	-0.697327	-0.786869	-1.17307	-1.36779	-0.622106	-1.123	-1.29744	-0.431239	-1.15806	-0.797484	-0.793096	-1.18236	-0.994323	-1.06199	-1.25852	-1.46311	-1.59618	-1.26413	-1.39243	-0.832755	-1.15034	-1.32903	-1.18625	-0.816899	-1.41218	anatomical structure development;anatomical structure morphogenesis;biological regulation;biosynthetic process;cardiac chamber development;cardiac ventricle development;cellular biosynthetic process;cellular macromolecule biosynthetic process;cellular macromolecule metabolic process;cellular metabolic process;cellular nitrogen compound metabolic process;cellular process;cellular protein metabolic…	binding;DNA binding;nucleic acid binding;protein binding;protein binding transcription factor activity;TBP-class protein binding;transcription coactivator activity;transcription cofactor activity;transcription factor binding;transcription factor binding transcription factor activity	cell part;cytoplasm;cytoplasmic part;extracellular membrane-bounded organelle;extracellular organelle;extracellular region part;extracellular vesicular exosome;intracellular membrane-bounded organelle;intracellular organelle;intracellular part;macromolecular complex;membrane-bounded organelle;membrane-bounded vesicle;nascent polypeptide-associated complex;nucleus;organelle;protein complex;vesicle		+	9	9	9	53.5	53.5	53.5	23.384	0	323.31	38437000000	19345000000	19091000000	0.0031539
0.458175	0.846905	1.51267	1.15034	0.246294	0.725132	0.942884	0.865269	1.12496	1.32287	0.806615	0.72169	1.65809	1.26093	0.269973	0.794846	1.03353	1.23312	1.45005	1.02979	1.2711	1.44294	0.818522	0.681692	1.29837	0.799351	0.677424	1.69092	1.28589	0.810579	1.05399	0.901665						7	7	7	63.1	63.1	63.1	11.133	0	91.401	4805200000	3258200000	1547100000	0.176465
NaN	0.935872	-0.229666	0.381516	0.690434	NaN	0.947697	0.33353	0.0928776	0.926574	-0.0783677	0.708277	-0.231484	0.418195	0.756813	NaN	1.03881	0.101807	1.01566	1.59495	2.05995	0.779233	1.05455	-0.178652	0.815652	3.07804	0.635859	-0.237119	0.426473	NaN	1.05937	-0.0809108	catabolic process;cell differentiation;cellular catabolic process;cellular developmental process;cellular macromolecule catabolic process;cellular macromolecule metabolic process;cellular metabolic process;cellular nitrogen compound metabolic process;cellular process;developmental process;DNA catabolic process;DNA catabolic process, endonucleolytic;DNA fragmentation involved in apoptotic nuclear …	binding;catalytic activity;deoxyribonuclease activity;deoxyribonuclease II activity;DNA binding;endodeoxyribonuclease activity;endodeoxyribonuclease activity, producing 3'-phosphomonoesters;endonuclease activity;endonuclease activity, active with either ribo- or deoxyribonucleic acids and producing 3'-phosphomonoesters;hydrolase activity;hydrolase activity, acting on ester bonds;nuclease activity…	cell part;cytoplasmic part;extracellular membrane-bounded organelle;extracellular organelle;extracellular region part;extracellular vesicular exosome;intracellular;intracellular membrane-bounded organelle;intracellular organelle;intracellular part;lysosome;lytic vacuole;membrane-bounded organelle;membrane-bounded vesicle;organelle;vacuole;vesicle	Lysosome		8	8	8	31.8	31.8	31.8	33.615	0	52.217	4831700000	1411300000	3420400000	0.0872047
-1.39653	-0.60252	-0.252842	-0.329703	-0.913085	-0.163046	-1.13806	-0.688536	0.58765	-0.364021	-0.380935	-0.393017	-0.254843	-0.332313	-0.920311	-0.164337	-1.14707	0.644147	-0.366901	-1.21314	-1.055	-0.625401	-0.801383	-0.302382	-0.64599	-0.453705	-0.907452	-0.261047	-0.340403	-0.168337	-1.17499	-0.393297	biosynthetic process;cellular biosynthetic process;cellular lipid metabolic process;cellular metabolic process;cellular process;ether lipid biosynthetic process;ether lipid metabolic process;glycerol ether biosynthetic process;glycerol ether metabolic process;glycerolipid biosynthetic process;glycerolipid metabolic process;lipid biosynthetic process;lipid metabolic process;metabolic process;organ…	alkylglycerone-phosphate synthase activity;binding;catalytic activity;coenzyme binding;cofactor binding;FAD binding;flavin adenine dinucleotide binding;oxidoreductase activity;oxidoreductase activity, acting on CH-OH group of donors;oxidoreductase activity, acting on the CH-OH group of donors, NAD or NADP as acceptor;transferase activity;transferase activity, transferring alkyl or aryl (other tha…	cell part;cytoplasmic part;intracellular membrane-bounded organelle;intracellular non-membrane-bounded organelle;intracellular organelle;intracellular organelle lumen;intracellular organelle part;intracellular part;membrane;membrane-bounded organelle;membrane-enclosed lumen;microbody;microbody lumen;microbody membrane;microbody part;mitochondrion;non-membrane-bounded organelle;nuclear part;nucleo…	Ether lipid metabolism;Peroxisome		32	32	32	63.7	63.7	63.7	72.911	0	323.31	24864000000	13390000000	11473000000	0.645826
-0.058415	1.51477	0.216714	0.115224	0.210035	-0.00541597	-0.146781	0.103748	-0.145092	-0.100666	0.108404	-0.37656	0.237549	0.126301	0.230228	-0.00545883	-0.147943	-0.14624	-0.101463	0.613001	-0.0452453	0.856986	0.283985	0.486421	0.189543	-0.0437114	0.212075	0.242251	0.128801	-0.00559173	-0.151545	0.121178	anatomical structure development;antigen processing and presentation;antigen processing and presentation of exogenous antigen;antigen processing and presentation of exogenous peptide antigen;antigen processing and presentation of exogenous peptide antigen via MHC class II;antigen processing and presentation of peptide antigen;antigen processing and presentation of peptide antigen via MHC class II…	adenyl nucleotide binding;adenyl ribonucleotide binding;ATP binding;ATPase activity;binding;catalytic activity;hydrolase activity;hydrolase activity, acting on acid anhydrides;hydrolase activity, acting on acid anhydrides, in phosphorus-containing anhydrides;microtubule motor activity;motor activity;nucleoside-triphosphatase activity;nucleotide binding;purine nucleotide binding;purine ribonucleos…	cell part;centrosome;cytoplasmic part;cytoskeletal part;cytosol;intracellular non-membrane-bounded organelle;intracellular organelle;intracellular organelle part;intracellular part;kinesin complex;macromolecular complex;membrane;microtubule;microtubule associated complex;microtubule organizing center;non-membrane-bounded organelle;organelle;organelle part;protein complex;spindle pole			27	27	24	45	45	40.5	75.042	0	187.17	7403700000	4771000000	2632700000	0.665848
-0.741741	-1.27873	-0.311568	-0.232355	-0.581026	-0.259223	-0.863013	-0.892844	-0.318977	-0.456986	-0.420842	-0.466663	-0.314034	-0.234194	-0.585625	-0.261274	-0.869843	-0.321502	-0.460603	-0.485395	-0.638811	-0.146712	-0.33764	-0.141822	-0.263192	-0.159935	-1.11372	-0.321679	-0.239896	-0.267635	-0.891019	-0.434499	biological regulation;cellular macromolecule metabolic process;cellular metabolic process;cellular nitrogen compound metabolic process;cellular process;cellular response to stimulus;cellular response to stress;establishment of localization;establishment of localization in cell;establishment of RNA localization;intracellular transport;macromolecule metabolic process;metabolic process;mRNA export f…	adenyl nucleotide binding;adenyl ribonucleotide binding;ATP binding;ATPase activity;ATPase activity, coupled;ATP-dependent helicase activity;ATP-dependent RNA helicase activity;binding;catalytic activity;helicase activity;hydrolase activity;hydrolase activity, acting on acid anhydrides;hydrolase activity, acting on acid anhydrides, in phosphorus-containing anhydrides;nucleoside-triphosphatase act…	cell part;cytoplasm;intracellular membrane-bounded organelle;intracellular non-membrane-bounded organelle;intracellular organelle;intracellular organelle part;intracellular part;macromolecular complex;membrane;membrane-bounded organelle;non-membrane-bounded organelle;nuclear part;nucleolus;nucleus;organelle;organelle part;ribonucleoprotein complex;spliceosomal complex			31	17	17	70.7	45.9	45.9	49.129	0	323.31	30951000000	17337000000	13614000000	0.485498
0.291756	3.72176	-0.0383792	-0.230858	0.899534	1.25395	1.13617	0.422684	-0.693826	-0.516379	-0.0982209	-1.39767	-0.0386829	-0.232685	0.986015	1.3745	1.24541	-0.699317	-0.520466	-1.12862	0.528061	1.58428	0.39646	-0.640486	-0.719888	-1.15164	1.83092	-0.0396246	-0.23835	1.40171	1.27006	-0.101408	biological regulation;regulation of biological process;regulation of biosynthetic process;regulation of cellular biosynthetic process;regulation of cellular macromolecule biosynthetic process;regulation of cellular metabolic process;regulation of cellular process;regulation of gene expression;regulation of macromolecule biosynthetic process;regulation of macromolecule metabolic process;regulation…	binding;cation binding;ion binding;metal ion binding;protein binding transcription factor activity;transcription coactivator activity;transcription cofactor activity;transcription factor binding transcription factor activity;transition metal ion binding;zinc ion binding	adherens junction;anchoring junction;cell junction;cell part;cell-substrate adherens junction;cell-substrate junction;cytoplasm;cytoskeleton;focal adhesion;intracellular non-membrane-bounded organelle;intracellular organelle;intracellular organelle part;intracellular part;macromolecular complex;non-membrane-bounded organelle;nuclear part;nucleoplasm part;organelle;organelle part;protein complex;t…			25	25	25	89.4	89.4	89.4	36.071	0	323.31	27856000000	21639000000	6217700000	0.96651
-1.58932	-1.37847	-1.81823	-2.19592	-0.944915	-1.45988	-1.27097	-1.84286	-1.92423	-2.445	-2.1959	-1.63212	-1.83261	-2.2133	-0.952393	-1.47144	-1.28103	-1.93946	-2.46435	-1.71188	-3.0882	-1.91176	-1.4936	-1.92387	-2.07483	-1.68348	-1.75253	-1.87723	-2.26718	-1.50726	-1.31222	-2.26716	biosynthetic process;carboxylic acid biosynthetic process;carboxylic acid catabolic process;carboxylic acid metabolic process;catabolic process;cellular biosynthetic process;cellular catabolic process;cellular ketone metabolic process;cellular lipid catabolic process;cellular lipid metabolic process;cellular metabolic process;cellular nitrogen compound metabolic process;cellular process;coenzyme …	acyl-CoA thioesterase activity;binding;carboxylic acid binding;carboxylic ester hydrolase activity;catalytic activity;CoA hydrolase activity;coenzyme binding;cofactor binding;fatty acid binding;fatty-acyl-CoA binding;hydrolase activity;hydrolase activity, acting on ester bonds;identical protein binding;lipid binding;monocarboxylic acid binding;palmitoyl-CoA hydrolase activity;protein binding;prot…	cell body;cell part;cell projection;cytoplasm;cytoplasmic part;cytosol;extracellular membrane-bounded organelle;extracellular organelle;extracellular region part;extracellular vesicular exosome;intracellular membrane-bounded organelle;intracellular organelle;intracellular organelle part;intracellular part;membrane-bounded organelle;membrane-bounded vesicle;mitochondrion;neuron projection;nuclear …	Biosynthesis of unsaturated fatty acids		14	14	1	54.4	54.4	4.4	37.419	0	97.345	6335100000	1468900000	4866200000	0.315115
-1.69202	-0.082071	-1.72604	-0.806587	0.18508	-1.62806	-0.752786	-1.78185	NaN	-0.564217	-1.08271	-0.694371	-1.7397	-0.81297	0.202874	-1.64095	-0.758744	NaN	-0.568682	-1.41311	-2.98213	NaN	-1.71268	-0.754264	NaN	NaN	-1.67543	-1.78205	-0.832762	-1.6809	-0.777216	-1.11785	biological regulation;cellular component organization;cellular component organization or biogenesis;defense response;establishment of localization;establishment of localization in cell;establishment of protein localization;establishment of RNA localization;immune response;immune system process;innate immune response;intracellular protein transport;intracellular transport;membrane organization;mRN…	actin-dependent ATPase activity;adenyl nucleotide binding;adenyl ribonucleotide binding;ATP binding;ATPase activity;ATPase activity, coupled;binding;catalytic activity;enzyme binding;GTPase binding;hydrolase activity;hydrolase activity, acting on acid anhydrides;hydrolase activity, acting on acid anhydrides, in phosphorus-containing anhydrides;motor activity;nucleoside-triphosphatase activity;nuc…	basal plasma membrane;brush border;cell part;cell projection;cell projection membrane;cell projection part;cytoplasm;cytoplasmic membrane-bounded vesicle;cytoplasmic part;cytoplasmic vesicle;cytoskeletal part;cytosol;extracellular membrane-bounded organelle;extracellular organelle;extracellular region part;extracellular vesicular exosome;filamentous actin;intracellular membrane-bounded organelle;…			13	13	13	16	16	16	117.91	0	22.27	855920000	438150000	417770000	0.22862
1.52075	-0.893114	-0.732757	0.00050865	1.41399	0.699017	1.25228	1.15013	1.41046	0.780474	0.450649	1.59706	-0.738556	0.000557551	1.54993	0.766221	1.37267	1.54607	0.855509	0.434522	1.11397	-0.613706	-0.808596	0.207486	0.283757	-1.29451	-0.193637	-0.756536	0.000568587	0.781387	1.39984	0.503752	biological regulation;cell activation;cell activation involved in immune response;cellular process;defense response;defense response to bacterium;defense response to Gram-positive bacterium;establishment of localization;establishment of localization in cell;exocytosis;immune effector process;immune system process;leukocyte activation;leukocyte activation involved in immune response;leukocyte degr…	actin binding;adenyl nucleotide binding;adenyl ribonucleotide binding;ATP binding;binding;catalytic activity;cytoskeletal protein binding;hydrolase activity;hydrolase activity, acting on acid anhydrides;hydrolase activity, acting on acid anhydrides, in phosphorus-containing anhydrides;motor activity;nucleoside-triphosphatase activity;nucleotide binding;protein binding;purine nucleotide binding;pu…	cell cortex part;cell part;cortical actin cytoskeleton;cortical cytoskeleton;cytoplasmic part;cytoskeletal part;cytoskeleton;filamentous actin;intracellular non-membrane-bounded organelle;intracellular organelle;intracellular organelle part;intracellular part;macromolecular complex;myosin complex;non-membrane-bounded organelle;organelle;organelle part;protein complex;unconventional myosin complex			50	50	44	55.5	55.5	50.1	124.84	0	323.31	39320000000	29342000000	9977600000	0.132142
0.204739	1.49899	0.116372	0.691943	0.768374	-0.0829033	0.446429	-0.104176	0.813281	0.551914	0.442792	-0.120052	0.12756	0.758466	0.842246	-0.0835594	0.489348	0.891469	0.604975	0.13624	0.35526	0.157414	0.164504	0.410954	0.1527	0.184415	0.310175	0.130085	0.773479	-0.0855936	0.499035	0.494969	amine transport;biological regulation;cellular component assembly;cellular component assembly at cellular level;cellular component organization;cellular component organization at cellular level;cellular component organization or biogenesis;cellular component organization or biogenesis at cellular level;cellular macromolecular complex assembly;cellular macromolecular complex subunit organization;c…	binding;protein binding;SNAP receptor activity;SNARE binding;syntaxin binding	adherens junction;anchoring junction;azurophil granule;cell junction;cell part;cell projection;cell-substrate adherens junction;cell-substrate junction;cytoplasm;cytoplasmic membrane-bounded vesicle;cytoplasmic part;cytoplasmic vesicle;extracellular membrane-bounded organelle;extracellular organelle;extracellular region part;extracellular vesicular exosome;focal adhesion;intracellular membrane-bo…	SNARE interactions in vesicular transport		13	13	13	65.9	65.9	65.9	23.354	0	257.06	7673100000	5299100000	2374000000	0.692496
-1.08989	-1.41033	-0.131101	-0.750854	-1.48731	-1.04215	-1.58893	-0.59605	-0.543466	-0.667543	-0.799535	-0.585242	-0.132139	-0.756796	-1.49908	-1.0504	-1.6015	-0.547767	-0.672825	-0.844608	-1.32946	-0.201327	-0.182993	-0.298289	-0.620725	-0.725216	-1.34539	-0.135356	-0.77522	-1.07597	-1.64049	-0.825481	biological regulation;cellular component organization;cellular component organization or biogenesis;cellular process;cellular response to chemical stimulus;cellular response to cytokine stimulus;cellular response to organic substance;cellular response to stimulus;negative regulation of apoptosis;negative regulation of biological process;negative regulation of cell death;negative regulation of cel…	binding;cytokine binding;growth factor binding;interleukin-1 binding;protein binding;protein N-terminus binding	actin cytoskeleton;apical plasma membrane;cell part;cell projection;clathrin-coated vesicle;coated vesicle;cytoplasmic membrane-bounded vesicle;cytoplasmic part;cytoplasmic vesicle;cytoskeleton;endoplasmic reticulum;envelope;intracellular membrane-bounded organelle;intracellular non-membrane-bounded organelle;intracellular organelle;intracellular organelle part;intracellular part;lamellipodium;ma…			6	6	4	41.6	41.6	34.6	26.099	0	44.319	1221800000	590000000	631780000	0.892651
0.33255	-0.49944	-1.08601	-1.27821	0.126358	-0.338105	0.080986	-0.156438	-1.32343	-0.615047	-0.39471	-0.548764	-1.09461	-1.28833	0.138506	-0.340781	0.088772	-1.3339	-0.619914	0.00844726	-0.495776	-0.681951	-1.15691	-1.05741	-0.447944	-1.05146	-0.292294	-1.12126	-1.31969	-0.349077	0.0905292	-0.407519	biological regulation;cellular macromolecule metabolic process;cellular metabolic process;cellular process;cellular protein metabolic process;cellular response to stimulus;establishment of localization;establishment of localization in cell;establishment of protein localization;establishment of protein localization in mitochondrion;establishment of protein localization to organelle;intracellular p…	binding;GAF domain binding;molecular transducer activity;protein binding;protein binding transcription factor activity;protein domain specific binding;signal transducer activity;transcription coactivator activity;transcription cofactor activity;transcription factor binding;transcription factor binding transcription factor activity;unfolded protein binding	cell part;cytoplasm;cytoplasmic part;cytosol;intracellular organelle part;intracellular part;membrane;nuclear part;nucleoplasm;organelle part			18	18	18	66.4	66.4	66.4	37.636	0	203.27	14661000000	8692200000	5969000000	0.761024
0.390684	0.288703	-0.431895	-0.415972	0.208909	-0.114638	0.441746	-0.043503	0.537047	-0.506359	-0.400343	0.746939	-0.435313	-0.419264	0.228993	-0.115545	0.484215	0.588678	-0.510367	0.0921432	0.0993759	-0.255422	-0.023417	-0.349653	-0.285589	-0.39497	0.152619	-0.445911	-0.429471	-0.118358	0.4938	-0.413335	biological regulation;cellular process;cellular response to stimulus;immune response;immune system process;metabolic process;positive regulation of biological process;positive regulation of catabolic process;positive regulation of cellular catabolic process;positive regulation of cellular metabolic process;positive regulation of cellular process;positive regulation of macromolecule metabolic proc…	binding;catalytic activity;GTP binding;GTPase activity;guanyl nucleotide binding;guanyl ribonucleotide binding;hydrolase activity;hydrolase activity, acting on acid anhydrides;hydrolase activity, acting on acid anhydrides, in phosphorus-containing anhydrides;nucleoside-triphosphatase activity;nucleotide binding;purine nucleotide binding;purine ribonucleoside triphosphate binding;purine ribonucleo…	cell part;cytoplasmic exosome (RNase complex);cytoplasmic part;cytosol;exosome (RNase complex);intracellular part;macromolecular complex;membrane;protein complex			17	17	17	43.2	43.2	43.2	72.453	0	212.37	3357800000	2029700000	1328100000	0.158153
1.05202	0.61611	-0.250087	-0.148309	0.341397	-0.357971	0.353744	1.42626	-0.758368	0.351559	0.49848	0.390572	-0.252066	-0.149482	0.374219	-0.360804	0.387753	-0.76437	0.385358	1.27227	0.660395	0.896188	0.610476	-0.250495	0.783046	-0.155899	1.67075	-0.258203	-0.153122	-0.369588	0.395428	0.557219	biological regulation;cellular process;cellular response to stimulus;positive regulation of biological process;positive regulation of cell communication;positive regulation of cellular process;positive regulation of I-kappaB kinase/NF-kappaB cascade;positive regulation of intracellular protein kinase cascade;positive regulation of response to stimulus;positive regulation of signal transduction;po…	binding;carbohydrate binding;galactose binding;molecular transducer activity;monosaccharide binding;signal transducer activity;sugar binding	cell part;cytoplasm;extracellular membrane-bounded organelle;extracellular organelle;extracellular region part;extracellular vesicular exosome;intracellular part;membrane-bounded organelle;membrane-bounded vesicle;organelle;vesicle			11	11	11	39.9	39.9	39.9	34.69	0	125.74	11552000000	8420900000	3130600000	0.131816
-0.388406	0.271694	-0.0597263	0.463986	0.197882	-0.385802	-0.23832	-0.297555	0.396454	0.210158	0.230355	-0.14954	-0.060199	0.508593	0.216907	-0.388855	-0.240206	0.434569	0.230363	-0.484803	0.327043	-0.371972	-0.169716	0.291972	-0.264802	-0.00364794	-0.278755	-0.0616645	0.51866	-0.398321	-0.246054	0.257499	anatomical structure development;biological adhesion;biological regulation;blood coagulation;brain development;carbohydrate transport;cell activation;cell activation involved in immune response;cell adhesion;cell-cell adhesion;cellular component assembly;cellular component organization;cellular component organization or biogenesis;cellular process;coagulation;developmental process;establishment o…	binding;protein binding;SNARE binding;syntaxin binding	apical plasma membrane;basolateral plasma membrane;cell part;cytoplasmic membrane-bounded vesicle;cytoplasmic part;cytoplasmic vesicle;cytosol;extracellular membrane-bounded organelle;extracellular organelle;extracellular region part;extracellular vesicular exosome;intracellular membrane-bounded organelle;intracellular organelle;intracellular part;membrane;membrane part;membrane-bounded organelle…			21	21	21	39.7	39.7	39.7	67.764	0	115.51	6643400000	4124800000	2518600000	0.761918
0.694545	0.358588	-0.429332	-0.596588	0.351732	0.528339	0.295012	0.663951	-0.758096	-0.210675	0.12177	0.0781443	-0.43273	-0.60131	0.385547	0.579133	0.323375	-0.764096	-0.212342	0.873452	-0.169294	0.0719488	0.210408	-0.573271	0.644627	-0.306674	0.711289	-0.443265	-0.615948	0.590597	0.329776	0.136119						8	8	8	30.1	30.1	30.1	20.332	0	323.31	5212300000	3547900000	1664400000	0.762975
0.288591	2.09444	0.538163	1.8001	1.13818	1.50851	0.526468	0.374163	2.66315	1.55591	0.832434	0.551143	0.589902	1.97316	1.2476	1.65354	0.577083	2.91919	1.7055	0.353735	1.54893	-0.957896	0.81396	1.83283	0.44484	1.65905	0.539718	0.601578	2.01222	1.68627	0.588506	0.930525	biological regulation;cellular process;cellular response to stimulus;establishment of localization;establishment of localization in cell;establishment of melanosome localization;establishment of organelle localization;establishment of pigment granule localization;establishment of protein localization;establishment of vesicle localization;intracellular protein transport;intracellular signal transd…	binding;catalytic activity;cytoskeletal protein binding;GDP binding;GTP binding;GTPase activity;guanyl nucleotide binding;guanyl ribonucleotide binding;hydrolase activity;hydrolase activity, acting on acid anhydrides;hydrolase activity, acting on acid anhydrides, in phosphorus-containing anhydrides;myosin binding;myosin V binding;nucleoside-triphosphatase activity;nucleotide binding;protein bindi…	apical plasma membrane;cell part;clathrin-coated vesicle;coated vesicle;cytoplasmic membrane-bounded vesicle;cytoplasmic part;cytoplasmic vesicle;cytoplasmic vesicle membrane;cytoplasmic vesicle part;endosomal part;endosome membrane;extracellular membrane-bounded organelle;extracellular organelle;extracellular region part;extracellular vesicular exosome;Golgi apparatus part;Golgi stack;Golgi-asso…	Pancreatic secretion		16	16	14	83	83	74.8	24.608	0	233.89	10191000000	8964200000	1226700000	0.557139
0.0909418	0.102635	0.0921066	0.470743	0.319202	0.465682	0.35653	-0.224415	0.475634	0.65522	0.431312	0.0330787	0.100962	0.516001	0.34989	0.510452	0.390807	0.521362	0.718213	-0.404865	0.0341933	-0.24724	-0.2131	-0.122927	-0.285878	0.04809	-0.200788	0.10296	0.526214	0.520556	0.398543	0.482137	anterograde axon cargo transport;anterograde synaptic vesicle transport;antigen processing and presentation;antigen processing and presentation of exogenous antigen;antigen processing and presentation of lipid antigen via MHC class Ib;antigen processing and presentation via MHC class Ib;antigen processing and presentation, exogenous lipid antigen via MHC class Ib;axon cargo transport;biological r…	binding;enzyme binding;GTP-dependent protein binding;phosphatase binding;protein binding;protein phosphatase binding	AP-3 adaptor complex;AP-type membrane coat adaptor complex;cell part;clathrin coated vesicle membrane;coated vesicle membrane;cytoplasmic part;cytoplasmic vesicle membrane;cytoplasmic vesicle part;Golgi apparatus;intracellular membrane-bounded organelle;intracellular organelle;intracellular organelle part;intracellular part;lysosomal membrane;macromolecular complex;membrane;membrane part;membrane…	Lysosome	+	42	42	35	42.6	42.6	36	116.19	0	229.54	12963000000	8244200000	4718400000	1.56021e-05
-0.363769	-0.345351	-1.03757	-0.963975	-0.122308	-0.372868	0.0315212	-0.564223	-0.876228	-0.496814	-0.597818	0.14596	-1.04578	-0.971604	-0.123275	-0.375819	0.0345517	-0.883162	-0.500746	-0.694423	-0.451533	-1.08914	-0.727278	-0.647715	-0.766698	-0.978744	-0.513479	-1.07124	-0.995258	-0.384968	0.0352356	-0.617219	B cell activation;B cell activation involved in immune response;B cell differentiation;biological regulation;cell activation;cell activation involved in immune response;cell differentiation;cellular developmental process;cellular process;developmental process;immune effector process;immune system process;leukocyte activation;leukocyte activation involved in immune response;leukocyte differentiati…	binding;carbohydrate binding	cell part;cytoplasm;extracellular membrane-bounded organelle;extracellular organelle;extracellular region part;extracellular space;extracellular vesicular exosome;intracellular part;membrane;membrane-bounded organelle;membrane-bounded vesicle;organelle;vesicle			6	6	6	20.2	20.2	20.2	35.808	0	15.756	1587200000	830620000	756530000	0.299371
0.12295	0.0935868	0.51308	0.578629	0.1186	0.700866	-0.135834	0.0602038	0.465274	0.424804	0.40585	0.0957782	0.562407	0.634259	0.130002	0.768247	-0.136909	0.510005	0.465645	0.431235	-0.0627955	0.456576	0.345882	0.448138	0.529173	0.467401	0.111851	0.57354	0.646813	0.783454	-0.140242	0.453674	cellular component assembly;cellular component assembly at cellular level;cellular component biogenesis;cellular component organization;cellular component organization at cellular level;cellular component organization or biogenesis;cellular component organization or biogenesis at cellular level;cellular macromolecular complex assembly;cellular macromolecular complex subunit organization;cellular …	4 iron, 4 sulfur cluster binding;binding;catalytic activity;cation binding;ion binding;iron-sulfur cluster binding;metal cluster binding;metal ion binding;NADH dehydrogenase (quinone) activity;NADH dehydrogenase (ubiquinone) activity;NADH dehydrogenase activity;oxidoreductase activity;oxidoreductase activity, acting on NADH or NADPH;oxidoreductase activity, acting on NADH or NADPH, quinone or sim…	cell part;cytoplasmic part;intracellular membrane-bounded organelle;intracellular organelle;intracellular organelle part;intracellular part;macromolecular complex;membrane;membrane part;membrane-bounded organelle;mitochondrial inner membrane;mitochondrial membrane;mitochondrial membrane part;mitochondrial part;mitochondrial respiratory chain complex I;mitochondrion;NADH dehydrogenase complex;orga…	Alzheimer's disease;Huntington's disease;Oxidative phosphorylation;Parkinson's disease		8	8	8	44.8	44.8	44.8	23.705	0	73.434	10926000000	7301900000	3623900000	0.284897
0.341869	0.0152034	NaN	-0.423425	NaN	NaN	0.758481	0.210351	NaN	-0.676607	0.194012	NaN	NaN	-0.426776	NaN	NaN	0.831402	NaN	-0.681961	NaN	5.16e-05	-0.434647	-0.080547	-0.528269	-0.0147319	NaN	0.0312672	NaN	-0.437165	NaN	0.847859	0.216873	amine transport;amino acid transport;biological regulation;carboxylic acid transport;cellular process;cytoplasmic sequestering of protein;cytoplasmic sequestering of transcription factor;D-amino acid transport;D-serine transport;establishment of localization;maintenance of location;maintenance of location in cell;maintenance of protein location;maintenance of protein location in cell;negative reg…		cell part;cytoplasm;cytoplasmic part;cytosol;Golgi apparatus;intracellular membrane-bounded organelle;intracellular organelle;intracellular part;membrane-bounded organelle;organelle;perinuclear region of cytoplasm	Adipocytokine signaling pathway;B cell receptor signaling pathway;Neurotrophin signaling pathway;T cell receptor signaling pathway		3	3	3	9.2	9.2	9.2	52.863	0	39.769	411390000	261790000	149600000	0.739286
-0.34747	-0.439261	-0.702897	-0.723285	0.00600697	-0.43987	-0.289981	-0.555278	-0.218165	-0.688001	-0.571783	-0.133778	-0.70846	-0.72901	0.00658448	-0.443351	-0.292276	-0.219892	-0.693445	-0.685937	-0.685061	-0.752384	-0.815599	-1.07302	-0.763072	-0.6101	-0.449911	-0.725707	-0.746757	-0.454144	-0.299392	-0.590338	activation of immune response;activation of innate immune response;anaphase-promoting complex-dependent proteasomal ubiquitin-dependent protein catabolic process;antigen processing and presentation;antigen processing and presentation of exogenous antigen;antigen processing and presentation of exogenous peptide antigen;antigen processing and presentation of exogenous peptide antigen via MHC class …		cell part;cytoplasmic part;cytosol;extracellular membrane-bounded organelle;extracellular organelle;extracellular region part;extracellular vesicular exosome;intracellular membrane-bounded organelle;intracellular organelle;intracellular organelle part;intracellular part;macromolecular complex;membrane;membrane-bounded organelle;membrane-bounded vesicle;nuclear part;nucleoplasm;nucleus;organelle;o…	Proteasome	+	27	27	27	70.1	70.1	70.1	47.463	0	198.59	31142000000	16828000000	14314000000	0.00607619
-0.338134	-0.349339	-0.719864	-0.760918	0.0509288	-0.431053	-0.202131	-0.595646	-0.212973	-0.63279	-0.61848	-0.10313	-0.725561	-0.76694	0.0558251	-0.434464	-0.20373	-0.214659	-0.637798	-0.699162	-0.564437	-0.748961	-0.78093	-1.09145	-0.693779	-0.560531	-0.268674	-0.743225	-0.785611	-0.445041	-0.20869	-0.638551	activation of immune response;activation of innate immune response;anaphase-promoting complex-dependent proteasomal ubiquitin-dependent protein catabolic process;antigen processing and presentation;antigen processing and presentation of exogenous antigen;antigen processing and presentation of exogenous peptide antigen;antigen processing and presentation of exogenous peptide antigen via MHC class …		cell part;cytoplasmic part;cytosol;extracellular membrane-bounded organelle;extracellular organelle;extracellular region part;extracellular vesicular exosome;intracellular organelle part;intracellular part;macromolecular complex;membrane;membrane-bounded organelle;membrane-bounded vesicle;nuclear part;nucleoplasm;organelle;organelle part;proteasome accessory complex;proteasome complex;proteasome …	Proteasome	+	27	27	27	61	61	61	52.904	0	323.31	17025000000	9085600000	7939600000	0.0342172
0.491856	-0.250097	-1.47266	NaN	0.571099	-0.489185	0.800835	0.424353	-0.141622	-0.71652	-0.647421	0.95392	-1.48432	NaN	0.626005	-0.493056	0.877827	-0.142743	-0.722191	-0.0882532	0.371344	-0.548596	-0.118027	-0.892591	-0.414758	-0.709208	-0.0120106	-1.52045	NaN	-0.50506	0.895203	-0.668431	activation of immune response;activation of innate immune response;anaphase-promoting complex-dependent proteasomal ubiquitin-dependent protein catabolic process;antigen processing and presentation;antigen processing and presentation of exogenous antigen;antigen processing and presentation of exogenous peptide antigen;antigen processing and presentation of exogenous peptide antigen via MHC class …	bHLH transcription factor binding;binding;protein binding;protein binding transcription factor activity;transcription coactivator activity;transcription cofactor activity;transcription factor binding;transcription factor binding transcription factor activity	cell part;cytoplasm;cytoplasmic part;cytosol;intracellular membrane-bounded organelle;intracellular organelle;intracellular organelle part;intracellular part;macromolecular complex;membrane-bounded organelle;nuclear part;nucleoplasm;nucleus;organelle;organelle part;proteasome regulatory particle;protein complex			8	8	8	45.7	45.7	45.7	24.682	0	48.995	3000300000	2172900000	827360000	0.405522
-0.16016	-0.432277	0.616923	0.417717	-0.0631333	0.473077	-0.267329	0.297407	0.210053	0.370181	0.450072	-0.0786523	0.676234	0.457877	-0.0636329	0.518559	-0.269444	0.230247	0.405771	0.732242	0.535653	0.621154	0.352556	0.964222	0.89132	0.671928	0.128333	0.68962	0.46694	0.528823	-0.276004	0.503108	anatomical structure development;anatomical structure morphogenesis;biological regulation;biosynthetic process;brain development;cell cycle arrest;cell cycle process;cell development;cell fate commitment;cell surface receptor linked signaling pathway;cellular biosynthetic process;cellular component organization;cellular component organization at cellular level;cellular component organization or b…	binding;binding, bridging;chromatin binding;DNA binding;DNA secondary structure binding;double-stranded DNA binding;four-way junction DNA binding;nucleic acid binding;protein binding;protein binding, bridging;protein N-terminus binding;regulatory region DNA binding;regulatory region nucleic acid binding;R-SMAD binding;sequence-specific DNA binding;SMAD binding;structure-specific DNA binding;trans…	cell division site part;cell part;chromatin;chromosomal part;cleavage furrow;cytoplasm;cytoplasmic part;cytosol;histone methyltransferase complex;intracellular membrane-bounded organelle;intracellular organelle;intracellular organelle part;intracellular part;macromolecular complex;membrane-bounded organelle;methyltransferase complex;nuclear matrix;nuclear part;nucleoplasm;nucleoplasm part;nucleus…		+	15	15	15	33.8	33.8	33.8	67.496	0	55.849	865200000	565410000	299790000	0.00723987
-0.337973	0.534443	0.15667	0.169108	-0.2372	-0.23674	-0.383449	-0.043466	0.158289	0.220365	-0.18841	0.222311	0.171732	0.185366	-0.239077	-0.238614	-0.386483	0.173507	0.241551	0.151134	-0.266102	0.0640372	-0.328582	0.065289	0.108037	0.341776	-0.283625	0.175131	0.189035	-0.244423	-0.395892	-0.194524	axon guidance;chemotaxis;locomotion;response to chemical stimulus;response to external stimulus;response to stimulus;taxis	binding;cation binding;heme binding;ion binding;iron ion binding;lipid binding;metal ion binding;steroid binding;tetrapyrrole binding;transition metal ion binding	cell part;cytoplasmic part;endoplasmic reticulum;endoplasmic reticulum membrane;endoplasmic reticulum part;extracellular membrane-bounded organelle;extracellular organelle;extracellular region part;extracellular vesicular exosome;integral to membrane;intracellular membrane-bounded organelle;intracellular non-membrane-bounded organelle;intracellular organelle;intracellular organelle part;intracell…			12	12	11	60.5	60.5	55.9	21.671	0	304.71	4051900000	2584100000	1467800000	0.935129
0.0505163	-0.171905	0.322333	0.234503	-0.0386425	0.2256	0.00439867	0.147707	0.147032	0.224008	0.282053	0.0773508	0.353322	0.257048	-0.0389484	0.247289	0.00482156	0.161168	0.245545	0.230928	-0.0141253	0.305559	0.109064	0.375268	0.21007	0.463944	0.107837	0.360316	0.262136	0.252184	0.004917	0.315289	biological regulation;biosynthetic process;cell cycle;cellular biosynthetic process;cellular component organization;cellular component organization at cellular level;cellular component organization or biogenesis;cellular component organization or biogenesis at cellular level;cellular macromolecule biosynthetic process;cellular macromolecule metabolic process;cellular metabolic process;cellular ni…	binding;chromatin binding;enzyme binding;protein binding;protein dimerization activity;protein heterodimerization activity	cell part;DSIF complex;intracellular membrane-bounded organelle;intracellular organelle;intracellular organelle part;intracellular part;macromolecular complex;membrane-bounded organelle;nuclear part;nucleoplasm;nucleoplasm part;nucleus;organelle;organelle part;protein complex;transcription elongation factor complex			39	39	39	44.1	44.1	44.1	120.5	0	323.31	18083000000	11526000000	6556800000	0.0992438
-0.0321745	0.329124	0.473921	0.545861	0.460553	0.589611	NaN	0.440421	-0.163117	0.491167	0.604956	0.314421	0.519484	0.59834	0.504831	0.646296	NaN	-0.164408	0.538387	0.880596	0.0148464	0.999847	0.919193	0.772741	0.640271	0.75975	0.118565	0.529767	0.610184	0.659089	NaN	0.676242	biological regulation;biosynthetic process;cellular biosynthetic process;cellular macromolecule biosynthetic process;cellular macromolecule metabolic process;cellular metabolic process;cellular nitrogen compound metabolic process;cellular process;gene expression;macromolecule biosynthetic process;macromolecule metabolic process;metabolic process;nitrogen compound metabolic process;nucleic acid me…	binding;DNA binding;nucleic acid binding;nucleic acid binding transcription factor activity;protein binding transcription factor activity;sequence-specific DNA binding transcription factor activity;transcription coactivator activity;transcription cofactor activity;transcription factor binding transcription factor activity	cell part;cytoplasm;histone acetyltransferase complex;histone methyltransferase complex;intracellular organelle part;intracellular part;macromolecular complex;methyltransferase complex;MLL1 complex;nuclear part;nucleoplasm;nucleoplasm part;organelle part;protein complex;SAGA-type complex;transcription factor complex;transcription factor TFIID complex;transcription factor TFTC complex	Basal transcription factors;Huntington's disease		15	15	15	22.9	22.9	22.9	110.11	0	191.76	1351900000	893770000	458160000	0.0593803
0.858327	0.689771	-0.41474	-1.27237	0.420502	-0.301302	0.669576	0.490784	-1.27781	-0.452168	0.00374809	0.277829	-0.418023	-1.28244	0.460929	-0.303686	0.733949	-1.28792	-0.455747	1.15631	0.542959	-0.0637641	0.40506	-1.21122	0.528635	-0.624784	1.16378	-0.428199	-1.31366	-0.311079	0.748477	0.00418975	apoptosis;biological regulation;catabolic process;cell death;cellular catabolic process;cellular component disassembly;cellular component disassembly at cellular level;cellular component disassembly involved in apoptosis;cellular component organization;cellular component organization at cellular level;cellular component organization or biogenesis;cellular component organization or biogenesis at c…		cell part;chromatin;chromosomal part;cytoplasm;cytoplasmic part;cytosol;intracellular membrane-bounded organelle;intracellular organelle;intracellular organelle part;intracellular part;membrane-bounded organelle;nuclear chromatin;nuclear chromosome part;nuclear part;nucleoplasm;nucleus;organelle;organelle part	Apoptosis		16	16	16	59.5	59.5	59.5	36.521	0	115.75	4077200000	2679900000	1397300000	0.484094
1.06919	1.3493	0.853273	0.766846	0.567768	2.89467	1.13479	1.3516	1.16029	1.66888	1.10431	-0.304081	0.935306	0.84057	0.622353	3.17296	1.24389	1.27184	1.82932	0.0545944	-0.81372	-1.28703	-0.172855	0.36373	0.245374	-0.497382	0.175185	0.95382	0.857208	3.23577	1.26851	1.23444	activation of caspase activity;apoptosis;biological regulation;biosynthetic process;cell death;cell differentiation;cellular biosynthetic process;cellular component assembly;cellular component assembly at cellular level;cellular component organization;cellular component organization at cellular level;cellular component organization or biogenesis;cellular component organization or biogenesis at ce…	binding;clathrin binding;lipid binding;phosphatidylinositol binding;phospholipid binding;protein binding;structural constituent of cytoskeleton;structural molecule activity	cell part;clathrin coated vesicle membrane;clathrin-coated vesicle;coated vesicle;coated vesicle membrane;cytoplasm;cytoplasmic membrane-bounded vesicle;cytoplasmic part;cytoplasmic vesicle;cytoplasmic vesicle membrane;cytoplasmic vesicle part;cytoskeleton;Golgi apparatus;intracellular membrane-bounded organelle;intracellular non-membrane-bounded organelle;intracellular organelle;intracellular or…	Huntington's disease	+	30	30	30	43.1	43.1	43.1	113.07	0	323.31	3340800000	2571100000	769760000	0.00052627
0.306266	0.323671	-1.70994	-1.81468	0.471215	-1.10013	0.36257	-0.0444309	-1.53266	-1.1519	-1.13024	-0.0635374	-1.72347	-1.82904	0.516518	-1.10883	0.397428	-1.54479	-1.16102	-0.193206	0.0702106	-0.775766	-0.69283	-1.15449	-0.863585	-1.59104	0.3351	-1.76543	-1.87357	-1.13583	0.405295	-1.16692	anion transport;biological adhesion;biological regulation;cell adhesion;cell-cell adhesion;cellular chemical homeostasis;cellular homeostasis;cellular ion homeostasis;cellular process;cellular response to stimulus;chemical homeostasis;chloride transport;establishment of localization;homeostatic process;homotypic cell-cell adhesion;inorganic anion transport;ion homeostasis;ion transport;platelet a…	anion channel activity;anion transmembrane transporter activity;channel activity;chloride channel activity;gated channel activity;ion channel activity;ion transmembrane transporter activity;passive transmembrane transporter activity;substrate-specific channel activity;substrate-specific transmembrane transporter activity;substrate-specific transporter activity;transmembrane transporter activity;t…	blood microparticle;brush border;cell part;cell projection;chloride channel complex;cytoplasm;cytoplasmic part;envelope;extracellular membrane-bounded organelle;extracellular organelle;extracellular region part;extracellular space;extracellular vesicular exosome;intracellular membrane-bounded organelle;intracellular organelle;intracellular organelle part;intracellular part;ion channel complex;mac…			21	21	20	87.1	87.1	84.6	26.922	0	323.31	275000000000	176000000000	99591000000	0.296278
-0.215979	-0.315761	-0.0230789	0.156314	-0.00197114	-0.522276	-0.517224	-0.5634	0.238648	0.124921	-0.153802	-0.123495	-0.0232615	0.171342	-0.00198674	-0.526409	-0.521317	0.261592	0.136931	-0.714515	-0.371955	-0.330302	-0.465927	-0.294369	-0.785967	-0.237607	-0.624749	-0.0238278	0.174734	-0.539225	-0.534009	-0.158794	biological regulation;biosynthetic process;cellular biosynthetic process;cellular component assembly;cellular component assembly at cellular level;cellular component organization;cellular component organization at cellular level;cellular component organization or biogenesis;cellular component organization or biogenesis at cellular level;cellular macromolecular complex assembly;cellular macromolec…	binding;catalytic activity;cysteine-type peptidase activity;hydrolase activity;nucleic acid binding;peptidase activity;peptidase activity, acting on L-amino acid peptides;RNA binding;small conjugating protein-specific protease activity;translation factor activity, nucleic acid binding;translation initiation factor activity;ubiquitin-specific protease activity	cell part;cytoplasmic part;cytosol;eukaryotic 43S preinitiation complex;eukaryotic 48S preinitiation complex;eukaryotic translation initiation factor 3 complex;intracellular part;macromolecular complex;membrane;protein complex;ribonucleoprotein complex;translation preinitiation complex	RNA transport		16	16	16	51.8	51.8	51.8	37.563	0	211.37	30803000000	15882000000	14921000000	0.0594733
-0.236969	-0.601202	-0.247513	-0.413607	-0.277551	-0.667135	-0.375084	-0.375396	0.459646	-0.524409	-0.4807	-0.0589434	-0.249471	-0.41688	-0.279748	-0.672415	-0.378053	0.503837	-0.528559	-0.811542	-0.182654	-0.262326	-0.531693	-0.492638	-0.635145	-0.364125	-0.87493	-0.255545	-0.427029	-0.688785	-0.387257	-0.4963	biological regulation;catabolic process;cellular catabolic process;cellular chemical homeostasis;cellular homeostasis;cellular ion homeostasis;cellular macromolecule catabolic process;cellular macromolecule metabolic process;cellular metabolic process;cellular process;cellular protein metabolic process;chemical homeostasis;entry into cell of other organism involved in symbiotic interaction;entry …	acid-amino acid ligase activity;binding;catalytic activity;ligase activity;ligase activity, forming carbon-nitrogen bonds;protein binding;RNA polymerase II transcription factor binding;small conjugating protein ligase activity;transcription factor binding;ubiquitin-protein ligase activity	cell part;cytoplasm;extracellular membrane-bounded organelle;extracellular organelle;extracellular region part;extracellular vesicular exosome;intracellular membrane-bounded organelle;intracellular organelle;intracellular part;macromolecular complex;membrane;membrane-bounded organelle;membrane-bounded vesicle;nucleus;organelle;protein complex;ubiquitin ligase complex;vesicle	Ubiquitin mediated proteolysis		13	12	10	19.1	17.9	16.3	98.911	0	16.246	679760000	364880000	314880000	0.231033
0.933803	-0.0369618	-0.810911	-0.951602	0.931338	-0.0790964	0.74118	0.74108	-0.0887368	-0.240074	-0.0822197	0.954892	-0.817328	-0.959133	1.02088	-0.0797224	0.812437	-0.089439	-0.241974	0.490522	0.692167	-0.40168	-0.141211	-0.185826	0.141706	-1.14024	0.337896	-0.837226	-0.982483	-0.0816632	0.828518	-0.0848879	activation of immune response;adaptive immune response;antigen receptor-mediated signaling pathway;B cell activation;B cell chemotaxis;B cell homeostasis;B cell receptor signaling pathway;biological regulation;biosynthetic process;cell activation;cell activation involved in immune response;cell chemotaxis;cell differentiation;cell migration;cell motility;cell surface receptor linked signaling pat…	1-phosphatidylinositol-3-kinase activity;adenyl nucleotide binding;adenyl ribonucleotide binding;ATP binding;binding;catalytic activity;inositol or phosphatidylinositol kinase activity;kinase activity;lipid kinase activity;nucleotide binding;phosphatidylinositol 3-kinase activity;phosphatidylinositol kinase activity;phosphatidylinositol phosphate kinase activity;phosphatidylinositol-4,5-bisphosph…	cell part;cytoplasmic part;cytosol;cytosolic part;intracellular membrane-bounded organelle;intracellular organelle;intracellular part;lysosome;lytic vacuole;macromolecular complex;mast cell granule;membrane;membrane-bounded organelle;organelle;phosphatidylinositol 3-kinase complex;plasma membrane;protein complex;vacuole	Acute myeloid leukemia;Aldosterone-regulated sodium reabsorption;Amoebiasis;Apoptosis;B cell receptor signaling pathway;Bacterial invasion of epithelial cells;Carbohydrate digestion and absorption;Chagas disease (American trypanosomiasis);Chemokine signaling pathway;Chronic myeloid leukemia;Colorectal cancer;Endometrial cancer;ErbB signaling pathway;Fc epsilon RI signaling pathway;Fc gamma R-medi…		34	34	32	40.5	40.5	39.2	119.48	0	111.31	4227700000	2780700000	1446900000	0.317603
0.0155195	0.559536	0.894046	0.512428	-0.466657	-0.105548	-0.240332	0.193353	0.364136	0.515069	0.766748	0.112514	0.98	0.561693	-0.47035	-0.106384	-0.242234	0.399144	0.564588	0.468768	0.233857	0.718554	0.968029	0.585759	0.716588	0.519644	0.653203	0.999398	0.572811	-0.108974	-0.248131	0.857099	biological regulation;carboxylic acid metabolic process;cellular ketone metabolic process;cellular metabolic process;cellular process;metabolic process;monocarboxylic acid metabolic process;organic acid metabolic process;oxoacid metabolic process;pyruvate metabolic process;regulation of acetyl-CoA biosynthetic process from pyruvate;regulation of biological process;regulation of biosynthetic proce…	catalytic activity;transferase activity;transferase activity, transferring acyl groups	cell part;cytoplasmic part;intracellular organelle lumen;intracellular organelle part;intracellular part;membrane-enclosed lumen;mitochondrial matrix;mitochondrial part;organelle lumen;organelle part	Citrate cycle (TCA cycle);Glycolysis / Gluconeogenesis;Pyruvate metabolism		17	17	17	39.7	39.7	39.7	51.459	0	217.24	4658000000	3133800000	1524200000	0.229865
0.623773	1.0345	0.841239	1.31944	0.406741	-0.242892	0.730997	0.679776	2.88875	NaN	0.907941	2.06775	0.922115	1.44629	0.445845	-0.244814	0.801275	3.16647	NaN	0.840823	1.67169	-0.336251	NaN	1.78071	-0.387509	1.82593	-0.303684	0.940368	1.47492	-0.250774	0.817135	1.01493	biological regulation;cell redox homeostasis;cellular homeostasis;cellular macromolecule metabolic process;cellular metabolic process;cellular process;cellular protein metabolic process;homeostatic process;macromolecule metabolic process;metabolic process;negative regulation of autophagy;negative regulation of biological process;negative regulation of catabolic process;negative regulation of cell…	catalytic activity;flavin-linked sulfhydryl oxidase activity;intramolecular oxidoreductase activity;intramolecular oxidoreductase activity, interconverting keto- and enol-groups;intramolecular oxidoreductase activity, transposing S-S bonds;isomerase activity;oxidoreductase activity;oxidoreductase activity, acting on a sulfur group of donors;oxidoreductase activity, acting on a sulfur group of don…	cell part;cytoplasmic part;extracellular membrane-bounded organelle;extracellular organelle;extracellular region part;extracellular space;extracellular vesicular exosome;Golgi apparatus;Golgi apparatus part;integral to Golgi membrane;integral to membrane;integral to organelle membrane;intercellular bridge;intracellular membrane-bounded organelle;intracellular organelle;intracellular organelle par…			9	9	9	21.5	21.5	21.5	66.86	0	36.573	1365700000	856610000	509040000	0.875983
0.538719	0.59548	NaN	NaN	0.621443	-0.0384962	0.381905	-0.13002	0.263167	NaN	0.0756206	0.164267	NaN	NaN	0.681189	-0.0388009	0.418622	0.288468	NaN	0.70578	0.0322296	0.0647084	0.0295221	-0.325107	-0.245368	NaN	0.308484	NaN	NaN	-0.0397455	0.426908	0.0845315	antigen processing and presentation;antigen processing and presentation of exogenous antigen;antigen processing and presentation of exogenous peptide antigen;antigen processing and presentation of exogenous peptide antigen via MHC class II;antigen processing and presentation of peptide antigen;antigen processing and presentation of peptide antigen via MHC class II;antigen processing and presentat…		cell part;centrosome;chromosomal part;condensed chromosome kinetochore;cytoplasmic part;cytoskeletal part;cytosol;dynactin complex;intracellular non-membrane-bounded organelle;intracellular organelle;intracellular organelle part;intracellular part;kinetochore;macromolecular complex;microtubule associated complex;microtubule organizing center;non-membrane-bounded organelle;organelle;organelle part…	Vasopressin-regulated water reabsorption		4	4	4	26.8	26.8	26.8	20.747	0	21.083	562380000	373070000	189310000	0.525181
0.589002	-0.320131	0.29776	0.0988667	0.577583	-0.424343	0.339572	0.280572	-0.340613	-0.465796	-0.333611	0.833607	0.326386	0.108372	0.633111	-0.427701	0.372218	-0.343309	-0.469482	-0.120961	0.52536	-0.576928	-0.382413	-0.338254	-0.269332	0.162779	-0.110914	0.332847	0.110517	-0.438114	0.379586	-0.344437	acetyl-CoA transport;biological regulation;BMP signaling pathway;cation transport;cell surface receptor linked signaling pathway;cellular process;cellular response to stimulus;coenzyme transport;cofactor transport;enzyme linked receptor protein signaling pathway;establishment of localization;hydrogen transport;ion transport;monovalent inorganic cation transport;proton transport;regulation of biol…	acetyl-CoA transporter activity;active transmembrane transporter activity;cation transmembrane transporter activity;coenzyme transporter activity;cofactor transporter activity;ion transmembrane transporter activity;secondary active transmembrane transporter activity;solute:cation symporter activity;solute:hydrogen symporter activity;substrate-specific transmembrane transporter activity;substrate-…	cell part;cytoplasmic part;endoplasmic reticulum membrane;endoplasmic reticulum part;Golgi apparatus part;Golgi membrane;integral to membrane;integral to plasma membrane;intracellular organelle part;intracellular part;intrinsic to membrane;intrinsic to plasma membrane;membrane;membrane part;organelle membrane;organelle part;plasma membrane part	Glycosphingolipid biosynthesis - ganglio series		6	6	6	14.4	14.4	14.4	60.908	0	11.391	50836000000	33976000000	16860000000	0.527457
-0.896728	-1.11129	-1.11418	-1.25789	-0.857335	-1.30073	-1.09831	-1.09025	-1.16923	-1.43293	-1.33605	-0.716924	-1.123	-1.26785	-0.86412	-1.31102	-1.10701	-1.17849	-1.44427	-1.26937	-1.47329	-1.35662	-1.45674	-1.78762	-1.40175	-1.15711	-1.25983	-1.15034	-1.29871	-1.34294	-1.13396	-1.37941	biological regulation;cellular process;cellular response to acid;cellular response to amine stimulus;cellular response to amino acid stimulus;cellular response to chemical stimulus;cellular response to endogenous stimulus;cellular response to organic nitrogen;cellular response to organic substance;cellular response to stimulus;establishment of localization;establishment of localization in cell;es…	binding;enzyme binding;enzyme inhibitor activity;enzyme regulator activity;GTPase binding;GTPase inhibitor activity;GTPase regulator activity;nucleoside-triphosphatase regulator activity;protein binding;protein transporter activity;Ran GTPase binding;Ras GTPase binding;small GTPase binding;substrate-specific transporter activity;transporter activity	cell part;cytoplasm;cytoplasmic part;Golgi apparatus;intracellular membrane-bounded organelle;intracellular non-membrane-bounded organelle;intracellular organelle;intracellular organelle part;intracellular part;macromolecular complex;membrane;membrane part;membrane-bounded organelle;non-membrane-bounded organelle;nuclear membrane;nuclear part;nuclear pore;nucleolus;nucleoplasm;nucleus;organelle;o…		+	49	49	47	64.9	64.9	64.3	123.63	0	323.31	58119000000	26290000000	31829000000	0.000392482
-2.19489	-2.06998	-0.0660633	-0.622199	-1.71517	-1.30767	-2.23803	-0.863086	-1.23386	-0.732146	-1.16305	-1.4215	-0.0665862	-0.627123	-1.72875	-1.31802	-2.25575	-1.24362	-0.73794	-1.23871	-2.75303	-0.771055	-0.557103	-0.873141	-1.26701	NaN	-1.03559	-0.0682072	-0.64239	-1.35011	-2.31066	-1.20079	biosynthetic process;cellular biosynthetic process;cellular component organization;cellular component organization at cellular level;cellular component organization or biogenesis;cellular component organization or biogenesis at cellular level;cellular macromolecule biosynthetic process;cellular macromolecule metabolic process;cellular metabolic process;cellular nitrogen compound metabolic process…	binding;catalytic activity;DNA binding;DNA-directed RNA polymerase activity;nucleic acid binding;nucleotidyltransferase activity;RNA polymerase activity;transferase activity;transferase activity, transferring phosphorus-containing groups	cell part;cytoplasmic part;intracellular membrane-bounded organelle;intracellular non-membrane-bounded organelle;intracellular organelle;intracellular organelle lumen;intracellular organelle part;intracellular part;membrane-bounded organelle;membrane-enclosed lumen;mitochondrial matrix;mitochondrial nucleoid;mitochondrial part;mitochondrion;non-membrane-bounded organelle;nucleoid;organelle;organe…			10	10	10	11.5	11.5	11.5	138.62	0	55.789	601460000	244950000	356520000	0.907216
-0.215114	-0.380905	0.363614	0.152903	-0.546543	-0.0576344	-0.528107	-0.0307604	0.315537	-0.082964	0.0902366	-0.080637	0.398572	0.167603	-0.550868	-0.0580906	-0.532286	0.345873	-0.0836206	0.0155725	0.098267	0.428935	0.193491	0.342062	0.133806	0.432622	-0.0761773	0.406461	0.17092	-0.0595048	-0.545245	0.10087	biological regulation;biosynthetic process;cellular biosynthetic process;cellular component organization;cellular component organization at cellular level;cellular component organization or biogenesis;cellular component organization or biogenesis at cellular level;cellular macromolecule biosynthetic process;cellular macromolecule metabolic process;cellular metabolic process;cellular nitrogen comp…	protein binding transcription factor activity;transcription cofactor activity;transcription corepressor activity;transcription factor binding transcription factor activity	cell part;chromatin remodeling complex;cytoplasm;histone deacetylase complex;intracellular organelle part;intracellular part;macromolecular complex;nuclear body;nuclear part;nuclear speck;nucleoplasm;nucleoplasm part;organelle part;protein complex	mRNA surveillance pathway;RNA transport		14	14	14	81	81	81	17.561	0	197.48	19942000000	12303000000	7639100000	0.246072
-0.173405	0.152864	0.578715	-0.107072	-1.99682	0.457887	0.334492	-0.254241	-1.89119	-0.0599615	0.891185	-1.0043	0.634353	-0.10792	-2.01262	0.501908	0.36665	-1.90615	-0.060436	-1.14335	-0.658739	-0.880517	0.0739291	-0.70506	-0.480959	-0.353263	0.573007	0.646909	-0.110547	0.511843	0.373907	0.996199	anatomical structure morphogenesis;biological regulation;biosynthetic process;cellular biosynthetic process;cellular macromolecule biosynthetic process;cellular macromolecule metabolic process;cellular metabolic process;cellular process;cellular protein metabolic process;developmental process;establishment of localization;establishment of RNA localization;gene expression;macromolecule biosyntheti…	binding;mRNA 3'-UTR binding;mRNA 5'-UTR binding;mRNA binding;nucleic acid binding;nucleotide binding;RNA binding;translation regulator activity	cell part;cytoplasm;cytoplasmic part;cytosol;intracellular membrane-bounded organelle;intracellular organelle;intracellular part;membrane-bounded organelle;nucleus;organelle			19	16	16	40.9	35.8	35.8	63.704	0	111.5	7664000000	3571200000	4092800000	0.176936
0.493199	2.21288	-0.331368	-0.419575	0.540863	0.292439	0.526629	0.318088	-0.678502	-0.218608	-0.0296794	-0.0246698	-0.33399	-0.422895	0.592861	0.320554	0.577259	-0.683871	-0.220338	-0.0480862	-0.0423521	-0.292841	0.455918	-0.725256	0.0254311	-0.35866	0.910186	-0.342121	-0.43319	0.326899	0.588686	-0.0306425	anatomical structure morphogenesis;apoptosis;apoptotic mitochondrial changes;biological regulation;cell death;cell part morphogenesis;cellular component assembly;cellular component assembly at cellular level;cellular component disassembly;cellular component disassembly at cellular level;cellular component disassembly involved in apoptosis;cellular component morphogenesis;cellular component organi…	binding;catalytic activity;enzyme binding;GTP binding;GTPase activity;guanyl nucleotide binding;guanyl ribonucleotide binding;hydrolase activity;hydrolase activity, acting on acid anhydrides;hydrolase activity, acting on acid anhydrides, in phosphorus-containing anhydrides;identical protein binding;lipid binding;nucleoside-triphosphatase activity;nucleotide binding;protein binding;protein dimeriz…	cell junction;cell part;clathrin coated vesicle membrane;coated pit;coated vesicle membrane;cytoplasm;cytoplasmic part;cytoplasmic vesicle membrane;cytoplasmic vesicle part;cytoskeletal part;cytosol;Golgi apparatus;intracellular membrane-bounded organelle;intracellular organelle;intracellular organelle part;intracellular part;macromolecular complex;membrane;membrane part;membrane-bounded organell…	Bacterial invasion of epithelial cells;Endocrine and other factor-regulated calcium reabsorption;Endocytosis;Fc gamma R-mediated phagocytosis		43	43	1	74.6	74.6	3	81.876	0	323.31	39395000000	27447000000	11948000000	0.632525
0.540459	-0.198298	-1.22654	-0.661826	0.536434	-0.296759	0.277568	0.141009	-0.437288	-0.413959	-0.783061	0.0586183	-1.23625	-0.667063	0.588006	-0.299108	0.304253	-0.440749	-0.417235	0.786605	0.0744685	-0.401902	-0.132998	-0.517805	-0.203337	-0.480449	0.526918	-1.26635	-0.683303	-0.306389	0.310276	-0.808472	cellular macromolecule metabolic process;cellular metabolic process;cellular nitrogen compound metabolic process;cellular process;macromolecule metabolic process;metabolic process;nitrogen compound metabolic process;nucleic acid metabolic process;nucleobase-containing compound metabolic process;primary metabolic process;RNA metabolic process;RNA processing	adenyl nucleotide binding;adenyl ribonucleotide binding;ATP binding;binding;catalytic activity;cyclase activity;ligase activity;ligase activity, forming phosphoric ester bonds;nucleic acid binding;nucleotide binding;purine nucleotide binding;purine ribonucleoside triphosphate binding;purine ribonucleotide binding;ribonucleotide binding;RNA binding;RNA-3'-phosphate cyclase activity	cell part;intracellular membrane-bounded organelle;intracellular organelle;intracellular organelle part;intracellular part;membrane-bounded organelle;nuclear part;nucleoplasm;nucleus;organelle;organelle part			16	16	16	60.9	60.9	60.9	39.336	0	174.89	4268900000	2855200000	1413700000	0.285473
-0.343774	0.173787	0.297961	-0.204654	-2.14341	-0.574359	-0.684757	-0.256703	NaN	0.0209656	0.0549941	-0.51072	0.326607	-0.206273	-2.16037	-0.578905	-0.690176	NaN	0.0229812	0.260245	0.315408	1.12432	0.761937	-0.739943	0.0545723	-0.00199508	0.318517	0.333072	-0.211295	-0.592998	-0.706978	0.0614745	establishment of localization;transport		cell part;cis-Golgi network;cytoplasmic membrane-bounded vesicle;cytoplasmic part;cytoplasmic vesicle;endocytic vesicle;endosomal part;endosome membrane;Golgi apparatus;Golgi apparatus part;Golgi cisterna membrane;Golgi lumen;Golgi membrane;integral to membrane;intracellular membrane-bounded organelle;intracellular organelle;intracellular organelle lumen;intracellular organelle part;intracellular…			11	11	11	20.7	20.7	20.7	81.879	0	75.897	1662800000	1033600000	629200000	0.156401
1.33125	1.51412	2.63086	2.31084	0.498757	1.6383	1.45929	1.19742	2.50314	1.99547	2.03742	1.7617	2.88379	2.53301	0.546707	1.7958	1.59959	2.74379	2.18731	1.48229	1.90241	2.71673	2.37161	1.07059	2.01535	1.59567	1.87699	2.94087	2.58314	1.83135	1.63125	2.2775	carbohydrate catabolic process;carbohydrate metabolic process;catabolic process;cell wall macromolecule catabolic process;cell wall macromolecule metabolic process;cell wall organization or biogenesis;cell wall polysaccharide metabolic process;cellodextrin metabolic process;cellular carbohydrate catabolic process;cellular carbohydrate metabolic process;cellular catabolic process;cellular cell wal…	beta-mannosidase activity;catalytic activity;hydrolase activity;hydrolase activity, acting on glycosyl bonds;hydrolase activity, hydrolyzing O-glycosyl compounds;mannosidase activity	cell part;cytoplasmic part;intracellular membrane-bounded organelle;intracellular organelle;intracellular part;lysosome;lytic vacuole;membrane-bounded organelle;organelle;vacuole	Lysosome;Other glycan degradation		35	35	34	43	43	42.2	100.89	0	265.83	9656700000	5960000000	3696700000	0.209551
NaN	0.503961	1.00965	0.867084	-0.645375	0.0784213	0.181032	-0.713014	1.15421	0.893218	0.0866576	0.944663	1.10672	0.950446	-0.650483	0.0859608	0.198437	1.26518	0.979092	0.548576	NaN	0.0322671	0.753001	1.09	-0.393995	0.710931	0.616951	1.12862	0.969259	0.0876623	0.202365	0.0968691	anatomical structure development;anatomical structure formation involved in morphogenesis;anatomical structure morphogenesis;angiogenesis;biological regulation;biosynthetic process;cell development;cellular biosynthetic process;cellular developmental process;cellular macromolecule biosynthetic process;cellular macromolecule metabolic process;cellular metabolic process;cellular nitrogen compound m…	binding;chromatin binding;core promoter proximal region DNA binding;core promoter proximal region sequence-specific DNA binding;DNA binding;nucleic acid binding;nucleic acid binding transcription factor activity;protein binding;protein binding transcription factor activity;regulatory region DNA binding;regulatory region nucleic acid binding;RNA polymerase II core promoter proximal region sequence…	cell part;intracellular membrane-bounded organelle;intracellular organelle;intracellular organelle part;intracellular part;macromolecular complex;membrane-bounded organelle;nuclear part;nucleoplasm part;nucleus;organelle;organelle part;protein complex;transcription factor complex			10	10	10	36.7	36.7	36.7	50.575	0	125.07	1687300000	1145300000	541920000	0.933695
0.340127	0.810895	-0.365136	-0.223736	0.368391	0.27162	0.544966	0.184959	0.748812	0.12508	0.375364	0.730546	-0.368025	-0.225506	0.403809	0.297734	0.597359	0.820803	0.137105	-0.119604	0.306409	-0.0871433	-0.00600418	-0.33663	-0.413027	-0.888281	0.340412	-0.376985	-0.230996	0.303627	0.609183	0.419596	cellular component organization;cellular component organization at cellular level;cellular component organization or biogenesis;cellular component organization or biogenesis at cellular level;cellular macromolecule metabolic process;cellular metabolic process;cellular process;cellular protein metabolic process;establishment of localization;establishment of localization in cell;establishment of pr…	binding;enzyme binding;GTPase binding;protein binding;Ral GTPase binding;Ras GTPase binding;small GTPase binding	cell part;cytoplasm;cytoplasmic part;cytosol;intracellular part		+	16	16	16	31.8	31.8	31.8	81.852	0	76.65	1698500000	995580000	702900000	0.0303215
1.28643	0.816995	1.05519	1.12173	1.0673	1.89118	0.707129	1.51084	1.0776	1.0837	1.61118	0.972529	1.15664	1.22957	1.16991	2.073	0.775112	1.1812	1.18789	1.30108	0.664449	1.14802	1.63911	1.34027	1.74092	0.952064	1.15381	1.17953	1.25391	2.11403	0.790455	1.80103	cellular metabolic process;cellular process;electron transport chain;generation of precursor metabolites and energy;metabolic process;mitochondrial electron transport, NADH to ubiquinone;oxidation-reduction process;respiratory electron transport chain;small molecule metabolic process	binding;catalytic activity;NADH dehydrogenase (quinone) activity;NADH dehydrogenase (ubiquinone) activity;NADH dehydrogenase activity;oxidoreductase activity;oxidoreductase activity, acting on NADH or NADPH;oxidoreductase activity, acting on NADH or NADPH, quinone or similar compound as acceptor;protein binding;protein complex binding	cell part;cytoplasmic part;extracellular membrane-bounded organelle;extracellular organelle;extracellular region part;extracellular vesicular exosome;intracellular membrane-bounded organelle;intracellular organelle;intracellular organelle part;intracellular part;macromolecular complex;membrane;membrane part;membrane-bounded organelle;membrane-bounded vesicle;mitochondrial inner membrane;mitochond…	Alzheimer's disease;Huntington's disease;Oxidative phosphorylation;Parkinson's disease		5	5	5	55.6	55.6	55.6	9.3697	0	13.062	25357000000	20268000000	5089100000	0.59119
-0.375973	-0.222234	-0.600708	-0.644877	0.0789728	-0.319474	-0.256187	-0.518882	-0.2553	-0.523021	-0.529444	-0.12322	-0.605462	-0.64998	0.0865652	-0.322002	-0.258214	-0.257321	-0.52716	-0.67542	-0.773119	-0.732583	-0.529784	-1.17265	-0.630856	-0.581428	-0.374146	-0.620202	-0.665804	-0.329841	-0.2645	-0.546625	activation of immune response;activation of innate immune response;anaphase-promoting complex-dependent proteasomal ubiquitin-dependent protein catabolic process;antigen processing and presentation;antigen processing and presentation of exogenous antigen;antigen processing and presentation of exogenous peptide antigen;antigen processing and presentation of exogenous peptide antigen via MHC class …	binding;catalytic activity;cation binding;endopeptidase activator activity;endopeptidase regulator activity;enzyme activator activity;enzyme regulator activity;hydrolase activity;ion binding;metal ion binding;metallopeptidase activity;peptidase activator activity;peptidase activity;peptidase activity, acting on L-amino acid peptides;peptidase regulator activity;proteasome binding;protein binding;…	cell part;cytoplasmic part;cytosol;extracellular membrane-bounded organelle;extracellular organelle;extracellular region part;extracellular vesicular exosome;intracellular membrane-bounded organelle;intracellular organelle;intracellular organelle part;intracellular part;macromolecular complex;membrane-bounded organelle;membrane-bounded vesicle;nuclear part;nucleoplasm;nucleus;organelle;organelle …	Proteasome	+	11	11	11	54.2	54.2	54.2	34.577	0	229.22	18013000000	10138000000	7875100000	0.00446012
-1.0169	-1.33854	-0.765399	-0.53805	-0.612325	-0.914676	-0.963841	-1.19357	-0.884929	-0.856281	-0.746029	-0.853772	-0.771456	-0.542308	-0.617171	-0.921914	-0.971469	-0.891932	-0.863057	-0.916065	-1.30798	-0.938759	-1.29544	-1.02064	-1.08306	-0.498714	-1.27526	-0.790237	-0.555511	-0.944358	-0.99512	-0.770239	biological regulation;cell surface receptor linked signaling pathway;cellular component assembly;cellular component organization;cellular component organization or biogenesis;cellular process;cellular response to chemical stimulus;cellular response to cytokine stimulus;cellular response to organic substance;cellular response to stimulus;cytokine-mediated signaling pathway;entry into cell of other…	binding;nuclear localization sequence binding;peptide binding;protein transporter activity;signal sequence binding;substrate-specific transporter activity;transporter activity	cell part;cytoplasmic part;cytosol;intracellular organelle part;intracellular part;macromolecular complex;membrane part;nuclear part;nuclear pore;nucleoplasm;organelle part;pore complex;protein complex			16	11	11	43.6	35.5	35.5	57.81	0	323.31	11672000000	6343900000	5328400000	0.256398
1.10565	0.642636	0.0778023	1.57489	1.75158	NaN	1.61658	-0.0611017	1.66327	-0.303372	1.84196	0.552073	0.0852822	1.7263	1.91998	NaN	1.77199	1.82318	-0.305773	1.97584	NaN	0.0270596	-1.08172	NaN	-0.0341857	1.77586	-0.608938	0.0869702	1.76047	NaN	1.80707	2.05901	carboxylic acid catabolic process;carboxylic acid metabolic process;catabolic process;cellular catabolic process;cellular ketone metabolic process;cellular lipid catabolic process;cellular lipid metabolic process;cellular metabolic process;cellular process;fatty acid catabolic process;fatty acid metabolic process;lipid catabolic process;lipid metabolic process;metabolic process;monocarboxylic aci…	acylglycerol lipase activity;carbon-nitrogen ligase activity, with glutamine as amido-N-donor;carboxylic ester hydrolase activity;catalytic activity;fatty acid amide hydrolase activity;hydrolase activity;hydrolase activity, acting on carbon-nitrogen (but not peptide) bonds;hydrolase activity, acting on carbon-nitrogen (but not peptide) bonds, in linear amides;hydrolase activity, acting on ester b…	cell part;cytoplasm;cytoskeleton;endomembrane system;integral to membrane;intracellular non-membrane-bounded organelle;intracellular organelle;intracellular part;intrinsic to membrane;membrane;membrane part;non-membrane-bounded organelle;organelle;organelle membrane;organelle part			14	14	14	42.5	42.5	42.5	63.065	0	81.307	2674600000	1937100000	737440000	0.424873
-1.1684	-1.04475	-0.152191	-0.625455	-1.96447	-1.21773	-1.89816	-0.800189	-0.994729	-0.988318	-0.947359	-1.15642	-0.153396	-0.630404	-1.98002	-1.22737	-1.91318	-1.0026	-0.99614	-0.783393	-1.04799	-0.481014	-0.641738	-0.191433	-0.568225	-0.365024	-0.983991	-0.15713	-0.645752	-1.25725	-1.95976	-0.978102	biological regulation;cell proliferation;cellular component biogenesis;cellular component biogenesis at cellular level;cellular component organization;cellular component organization at cellular level;cellular component organization or biogenesis;cellular component organization or biogenesis at cellular level;cellular localization;cellular macromolecule localization;cellular macromolecule metabol…	binding;ribonucleoprotein binding	cell part;chromosome;condensed chromosome;cytoplasm;intracellular membrane-bounded organelle;intracellular non-membrane-bounded organelle;intracellular organelle;intracellular organelle part;intracellular part;macromolecular complex;membrane;membrane-bounded organelle;non-membrane-bounded organelle;nuclear part;nucleolar part;nucleolus;nucleoplasm;nucleus;organelle;organelle part;PeBoW complex;pr…			20	20	20	38.3	38.3	38.3	68.002	0	187.4	20980000000	10145000000	10835000000	0.290858
-0.115784	-2.2199	-1.3713	-0.643098	0.817747	-0.751454	0.0553204	-0.781046	0.704454	-0.485452	-1.02488	0.758096	-1.38215	-0.648187	0.896365	-0.757401	0.060639	0.77218	-0.489294	-1.4724	-0.455258	-2.77764	-2.51135	-0.864969	-1.29341	-1.11101	-2.34109	-1.4158	-0.663967	-0.77584	0.0618392	-1.05814	actin cytoskeleton organization;actin filament-based process;axon guidance;biological regulation;cell communication;cell projection assembly;cell projection organization;cell surface receptor linked signaling pathway;cell-cell signaling;cellular component assembly;cellular component assembly at cellular level;cellular component organization;cellular component organization at cellular level;cellul…	binding;binding, bridging;cytokine receptor binding;cytoskeletal adaptor activity;cytoskeletal protein binding;frizzled binding;G-protein-coupled receptor binding;growth factor receptor binding;identical protein binding;interleukin-5 receptor binding;protein binding;protein binding, bridging;protein dimerization activity;protein heterodimerization activity;protein N-terminus binding;receptor bind…	adherens junction;anchoring junction;blood microparticle;cell junction;cell part;cell-substrate adherens junction;cell-substrate junction;cytoplasm;cytoplasmic membrane-bounded vesicle;cytoplasmic part;cytoplasmic vesicle;cytoskeleton;cytosol;endoplasmic reticulum membrane;endoplasmic reticulum part;extracellular membrane-bounded organelle;extracellular organelle;extracellular region part;extrace…		+	14	14	14	58.9	58.9	58.9	32.316	0	323.31	7399700000	3991800000	3407900000	0.0174858
-0.764272	-0.495232	0.0346328	-0.328487	-0.967144	-0.749093	-1.47872	-0.279842	-0.565637	-0.785903	-0.706699	-0.471227	0.0379624	-0.331087	-0.974798	-0.755022	-1.49042	-0.570113	-0.792122	-0.255557	-0.319659	0.144878	-0.00112199	0.733289	0.0497542	0.280845	-0.387876	0.0387138	-0.339147	-0.773403	-1.5267	-0.729632	biological regulation;cellular macromolecule metabolic process;cellular metabolic process;cellular nitrogen compound metabolic process;cellular process;macromolecule metabolic process;maturation of SSU-rRNA;metabolic process;ncRNA metabolic process;ncRNA processing;negative regulation of catalytic activity;negative regulation of hydrolase activity;negative regulation of molecular function;negativ…		cell part;chromosome;intracellular non-membrane-bounded organelle;intracellular organelle;intracellular organelle part;intracellular part;macromolecular complex;Mpp10 complex;non-membrane-bounded organelle;nuclear part;nucleolar part;nucleolus;organelle;organelle part;preribosome;protein complex;ribonucleoprotein complex;small nucleolar ribonucleoprotein complex;small-subunit processome	Ribosome biogenesis in eukaryotes	+	21	21	21	36.1	36.1	36.1	78.863	0	323.31	4944200000	2731700000	2212500000	0.00690142
-0.0342114	0.341668	1.01425	0.794246	-0.224395	0.0254914	-0.312907	0.466632	0.627441	0.373245	0.510131	0.502299	1.11176	0.870605	-0.226171	0.0279421	-0.315384	0.687763	0.409129	0.535845	0.521049	0.572106	0.718439	1.2692	0.706698	1.11268	0.791194	1.13376	0.887837	0.0284952	-0.323062	0.570244	cellular macromolecule metabolic process;cellular metabolic process;cellular nitrogen compound metabolic process;cellular process;macromolecule metabolic process;macromolecule modification;metabolic process;ncRNA metabolic process;ncRNA processing;nitrogen compound metabolic process;nucleic acid metabolic process;nucleobase-containing compound metabolic process;primary metabolic process;RNA metab…	binding;nucleic acid binding;RNA binding;snoRNA binding	box C/D snoRNP complex;cell part;cytoplasm;intracellular non-membrane-bounded organelle;intracellular organelle;intracellular organelle part;intracellular part;macromolecular complex;membrane;non-membrane-bounded organelle;nuclear part;nucleolar part;nucleolus;nucleoplasm;organelle;organelle part;preribosome;pre-snoRNP complex;ribonucleoprotein complex;small nucleolar ribonucleoprotein complex;sm…	Ribosome biogenesis in eukaryotes		45	45	45	77.9	77.9	77.9	66.049	0	323.31	82836000000	57553000000	25283000000	0.176544
-0.316535	-0.770333	-0.367394	-0.409587	-0.490567	-0.566861	-0.73871	-0.425058	-0.202518	-0.415341	-0.508261	-0.591451	-0.370301	-0.412829	-0.494449	-0.571347	-0.744556	-0.20412	-0.418628	-0.720004	-0.785702	-0.405776	-0.756482	-0.488579	-0.970121	-0.740482	-1.05203	-0.379316	-0.422879	-0.585256	-0.762682	-0.524755	biological regulation;biosynthetic process;cellular biosynthetic process;cellular component assembly;cellular component assembly at cellular level;cellular component organization;cellular component organization at cellular level;cellular component organization or biogenesis;cellular component organization or biogenesis at cellular level;cellular macromolecular complex assembly;cellular macromolec…	adenyl nucleotide binding;adenyl ribonucleotide binding;ATP binding;ATPase activity;ATPase activity, coupled;ATP-dependent DNA helicase activity;ATP-dependent helicase activity;ATP-dependent RNA helicase activity;binding;catalytic activity;CTPase activity;DNA binding;DNA helicase activity;DNA-dependent ATPase activity;eukaryotic initiation factor 4E binding;GTPase activity;helicase activity;hydro…	cell part;cytoplasm;cytoplasmic part;extracellular membrane-bounded organelle;extracellular organelle;extracellular region part;extracellular vesicular exosome;intracellular membrane-bounded organelle;intracellular non-membrane-bounded organelle;intracellular organelle;intracellular organelle part;intracellular part;macromolecular complex;membrane;membrane-bounded organelle;membrane-bounded vesic…	RIG-I-like receptor signaling pathway	+	43	43	13	72.1	72.1	24.3	73.243	0	323.31	60438000000	33468000000	26970000000	0.0138707
0.24365	-0.122616	0.334192	0.238795	-0.696773	-1.15008	-0.872193	0.31627	0.593987	-0.395288	-1.02708	0.710326	0.366322	0.261753	-0.702287	-1.15918	-0.879095	0.651093	-0.398416	-0.978838	0.686962	-0.540619	-0.693584	-0.36607	-1.20471	1.26251	0.154069	0.373572	0.266934	-1.1874	-0.900496	-1.06041	catabolic process;cellular catabolic process;cellular macromolecule catabolic process;cellular macromolecule metabolic process;cellular metabolic process;cellular nitrogen compound metabolic process;cellular process;macromolecule catabolic process;macromolecule metabolic process;metabolic process;nitrogen compound metabolic process;nucleic acid metabolic process;nucleobase-containing compound met…	binding;catalytic activity;endonuclease activity;endonuclease activity, active with either ribo- or deoxyribonucleic acids and producing 3'-phosphomonoesters;endoribonuclease activity;endoribonuclease activity, producing 3'-phosphomonoesters;hydrolase activity;hydrolase activity, acting on ester bonds;nuclease activity;nucleic acid binding;ribonuclease activity;ribonuclease T2 activity;RNA binding	cell part;cytoplasmic part;endoplasmic reticulum lumen;endoplasmic reticulum part;extracellular membrane-bounded organelle;extracellular organelle;extracellular region;extracellular region part;extracellular space;extracellular vesicular exosome;intracellular membrane-bounded organelle;intracellular organelle;intracellular organelle lumen;intracellular organelle part;intracellular part;lysosomal …			11	11	10	51.2	51.2	48.8	29.48	0	323.31	20593000000	11964000000	8629000000	0.613634
-0.169855	-0.0418094	-0.0686009	0.117533	-0.189446	0.208061	0.121493	-0.249635	-0.0749706	0.200796	0.206585	0.0287405	-0.0691438	0.128833	-0.190945	0.228064	0.133173	-0.0755639	0.2201	-0.299185	-0.283929	-0.385618	-0.166418	-0.212406	-0.293656	0.0901227	0.0754505	-0.0708271	0.131383	0.232578	0.135809	0.230929	biological regulation;cell surface receptor linked signaling pathway;cellular process;cellular response to chemical stimulus;cellular response to cytokine stimulus;cellular response to organic substance;cellular response to stimulus;cytokine-mediated signaling pathway;establishment of localization;establishment of localization in cell;establishment of protein localization;intracellular protein tr…	protein transporter activity;substrate-specific transporter activity;transporter activity	cell part;cytoplasmic part;cytosol;extracellular membrane-bounded organelle;extracellular organelle;extracellular region part;extracellular vesicular exosome;intracellular organelle part;intracellular part;membrane-bounded organelle;membrane-bounded vesicle;nuclear part;nucleoplasm;organelle;organelle part;vesicle		+	19	19	14	44.9	44.9	36.9	57.886	0	323.31	23111000000	14218000000	8893300000	0.00547688
0.882036	0.512336	1.11622	0.11571	1.25749	-0.242749	1.71924	-1.52862	-0.634102	2.1686	-0.615828	0.250294	1.22354	0.126835	1.37838	-0.24467	1.88452	-0.63912	2.37709	0.196331	0.781169	0.440837	0.00361828	-0.155201	NaN	-0.320117	1.41959	1.24775	0.129345	-0.250626	1.92182	-0.635812	biological regulation;catabolic process;cell surface receptor linked signaling pathway;cellular catabolic process;cellular macromolecule catabolic process;cellular macromolecule metabolic process;cellular metabolic process;cellular process;cellular protein metabolic process;cellular response to chemical stimulus;cellular response to cytokine stimulus;cellular response to interferon-gamma;cellular…	binding;catalytic activity;cation binding;ion binding;ligase activity;metal ion binding;molecular transducer activity;signal transducer activity;transition metal ion binding;zinc ion binding	cell part;cytoplasmic part;cytosol;intracellular part			11	11	11	31.2	31.2	31.2	53.415	0	22.045	778650000	507770000	270880000	0.739076
0.0134929	0.0030684	-0.761936	-0.411039	0.324864	-0.583996	-0.056043	-0.237734	0.103586	-0.600126	-0.472118	0.265245	-0.767966	-0.414292	0.356096	-0.588617	-0.0564865	0.113545	-0.604875	-0.325087	-0.25203	-0.492256	-0.648765	-0.574312	-0.634798	-0.689935	-0.308914	-0.786662	-0.424378	-0.602947	-0.0578616	-0.487439	cell cycle process;cellular macromolecule metabolic process;cellular metabolic process;cellular process;cellular protein metabolic process;dephosphorylation;G1/S transition of mitotic cell cycle;macromolecule metabolic process;macromolecule modification;metabolic process;phosphate-containing compound metabolic process;phosphorus metabolic process;primary metabolic process;protein dephosphorylatio…	binding;catalytic activity;cation binding;hydrolase activity;hydrolase activity, acting on ester bonds;ion binding;metal ion binding;phosphatase activity;phosphoprotein phosphatase activity;phosphoric ester hydrolase activity;protein serine/threonine phosphatase activity	cell part;cytoplasmic part;cytosol;intracellular part		+	14	14	14	62	62	62	35.144	0	216.91	13693000000	8161800000	5531100000	0.0162153
-0.286539	0.414465	0.844732	0.653928	-0.796874	-0.376275	0.140267	-0.805927	1.18796	0.606625	-0.483081	0.408332	0.925945	0.716796	-0.80318	-0.379253	0.153753	1.30217	0.664946	-1.07155	-0.273508	-0.926049	-0.00780349	-0.0928681	-0.540078	-0.221903	-0.430932	0.944273	0.730985	-0.388486	0.156796	-0.498758	alcohol metabolic process;carbohydrate metabolic process;cellular carbohydrate metabolic process;cellular macromolecule metabolic process;cellular metabolic process;cellular process;cellular protein metabolic process;hexose metabolic process;macromolecule metabolic process;macromolecule modification;mannose metabolic process;metabolic process;monosaccharide metabolic process;primary metabolic pro…	alpha-mannosidase activity;binding;carbohydrate binding;catalytic activity;cation binding;hydrolase activity;hydrolase activity, acting on glycosyl bonds;hydrolase activity, hydrolyzing O-glycosyl compounds;ion binding;mannosidase activity;metal ion binding;transition metal ion binding;zinc ion binding	cell part;cytoplasmic part;extracellular membrane-bounded organelle;extracellular organelle;extracellular region part;extracellular vesicular exosome;intracellular membrane-bounded organelle;intracellular organelle;intracellular part;lysosome;lytic vacuole;membrane-bounded organelle;membrane-bounded vesicle;organelle;vacuole;vesicle	Lysosome;Other glycan degradation		42	42	42	57.5	57.5	57.5	113.61	0	323.31	49864000000	29720000000	20143000000	0.169349
0.499039	-1.5601	-1.93124	-1.79534	0.857402	-1.12856	0.411537	0.322232	-0.66811	-0.62743	-0.833511	0.599443	-1.94652	-1.80955	0.939833	-1.13749	0.451102	-0.673397	-0.632396	-0.855038	0.197986	-2.16531	-1.58744	-0.452657	-0.399783	-1.96266	-0.614945	-1.99391	-1.85361	-1.16518	0.460031	-0.86056	biosynthetic process;cell proliferation;cellular biosynthetic process;cellular metabolic compound salvage;cellular metabolic process;cellular process;coenzyme biosynthetic process;coenzyme metabolic process;cofactor biosynthetic process;cofactor metabolic process;heterocycle metabolic process;metabolic process;pyridoxal 5'-phosphate salvage;pyridoxal phosphate biosynthetic process;pyridoxal phosp…	adenyl nucleotide binding;adenyl ribonucleotide binding;alkali metal ion binding;ATP binding;binding;catalytic activity;cation binding;cofactor binding;identical protein binding;ion binding;kinase activity;lithium ion binding;magnesium ion binding;metal ion binding;nucleotide binding;phosphotransferase activity, alcohol group as acceptor;potassium ion binding;protein binding;protein dimerization …	cell part;cytoplasm;cytoplasmic part;cytosol;extracellular membrane-bounded organelle;extracellular organelle;extracellular region part;extracellular vesicular exosome;intracellular membrane-bounded organelle;intracellular organelle;intracellular organelle part;intracellular part;membrane-bounded organelle;membrane-bounded vesicle;nuclear part;nucleoplasm;nucleus;organelle;organelle part;vesicle	Vitamin B6 metabolism		13	13	13	61.5	61.5	61.5	35.102	0	179.98	6249200000	3901500000	2347700000	0.289979
0.00513837	0.0196147	0.556892	0.383757	-0.0822994	0.624173	0.00753437	0.29826	0.265954	0.307159	0.447842	0.297322	0.610432	0.420651	-0.0829507	0.684181	0.00825872	0.291523	0.33669	0.50249	0.401282	0.92516	0.283317	0.702386	0.560888	0.806078	0.188924	0.622515	0.428977	0.697724	0.00842219	0.500614	anatomical structure development;anatomical structure formation involved in morphogenesis;androgen receptor signaling pathway;ATP-dependent chromatin remodeling;biological regulation;biosynthetic process;blood vessel development;cardiac chamber development;cellular biosynthetic process;cellular component disassembly;cellular component disassembly at cellular level;cellular component organization;…	binding;DNA binding;ligand-dependent nuclear receptor binding;nucleic acid binding;protein binding;protein binding transcription factor activity;receptor binding;transcription coactivator activity;transcription cofactor activity;transcription factor binding transcription factor activity	cell part;chromatin;chromatin remodeling complex;chromosomal part;intracellular membrane-bounded organelle;intracellular organelle;intracellular organelle part;intracellular part;macromolecular complex;membrane-bounded organelle;nBAF complex;npBAF complex;nuclear chromatin;nuclear chromosome part;nuclear part;nucleoplasm;nucleus;organelle;organelle part;protein complex;SWI/SNF complex;SWI/SNF-typ…		+	68	68	65	42	42	40.3	242.04	0	323.31	13901000000	9253100000	4647400000	0.0259287
0.673574	0.404318	1.18953	0.764728	-0.709941	0.334649	-0.398507	1.35718	0.181348	-0.0936401	0.805814	0.530546	1.30389	0.838249	-0.715559	0.366822	-0.40166	0.198783	-0.0943811	1.41895	0.985362	2.03861	1.81082	0.751044	1.49921	1.03089	0.733095	1.3297	0.854841	0.374083	-0.411439	0.900769	biological regulation;biosynthetic process;cell cycle;cellular biosynthetic process;cellular macromolecule biosynthetic process;cellular macromolecule metabolic process;cellular metabolic process;cellular nitrogen compound metabolic process;cellular process;DNA metabolic process;DNA replication;DNA-dependent DNA replication;macromolecule biosynthetic process;macromolecule metabolic process;metabo…	binding;DNA polymerase binding;enzyme binding;protein binding	cell part;cytoplasmic part;intracellular membrane-bounded organelle;intracellular organelle;intracellular part;membrane-bounded organelle;nucleus;organelle;perinuclear region of cytoplasm		+	4	4	4	65.5	65.5	65.5	9.6008	0	62.497	1978200000	1366700000	611500000	0.0155065
-0.681658	-0.811996	-1.17897	-1.37796	-0.385911	-0.832946	-0.749981	-1.10064	-1.19277	-1.44186	-1.00337	-1.10069	-1.1883	-1.38886	-0.388965	-0.839538	-0.755916	-1.20221	-1.45327	-1.168	-1.37478	-1.30149	-1.12	-1.70873	-1.19352	NaN	-0.740285	-1.21723	-1.42267	-0.859976	-0.774319	-1.03593	biological regulation;cell redox homeostasis;cellular homeostasis;cellular process;homeostatic process;regulation of biological process;regulation of biological quality;regulation of cellular process		cell part;centrosome;cytoplasm;cytoplasmic part;cytoskeletal part;intracellular membrane-bounded organelle;intracellular non-membrane-bounded organelle;intracellular organelle;intracellular organelle part;intracellular part;membrane-bounded organelle;microtubule organizing center;midbody;non-membrane-bounded organelle;nucleus;organelle;organelle part			5	5	5	23.9	23.9	23.9	22.199	0	15.717	1163900000	530380000	633510000	0.217646
1.50754	1.26748	1.41676	-0.597356	1.39878	1.41968	0.730039	0.843374	1.21585	1.22975	1.00532	1.48596	1.55297	-0.602083	1.53326	1.55617	0.800225	1.33275	1.34798	1.55501	-0.167802	1.88578	1.57352	1.52297	2.03775	1.61724	1.7549	1.58371	-0.616741	1.58697	0.816064	1.12379	biosynthetic process;cellular biosynthetic process;cellular macromolecule metabolic process;cellular metabolic process;cellular nitrogen compound metabolic process;cellular process;electron transport chain;gene expression;generation of precursor metabolites and energy;macromolecule metabolic process;metabolic process;nitrogen compound metabolic process;nucleic acid metabolic process;nucleobase-co…	catalytic activity;cation transmembrane transporter activity;cytochrome-c oxidase activity;heme-copper terminal oxidase activity;hydrogen ion transmembrane transporter activity;inorganic cation transmembrane transporter activity;ion transmembrane transporter activity;monovalent inorganic cation transmembrane transporter activity;oxidoreductase activity;oxidoreductase activity, acting on a heme gr…	cell part;cytoplasmic part;intracellular organelle part;intracellular part;membrane;membrane part;mitochondrial inner membrane;mitochondrial membrane;mitochondrial membrane part;mitochondrial part;mitochondrial respiratory chain;organelle inner membrane;organelle membrane;organelle part;respiratory chain	Alzheimer's disease;Cardiac muscle contraction;Huntington's disease;Oxidative phosphorylation;Parkinson's disease		7	7	7	70.2	70.2	70.2	12.615	0	65.549	2865300000	2141900000	723370000	0.572559
-0.272016	-0.228667	0.186621	0.225795	-0.22656	0.159975	-0.580931	-0.2688	0.170173	-0.064955	-0.0295148	-0.304324	0.204563	0.247503	-0.228353	0.175355	-0.585528	0.186533	-0.065469	-0.132371	-0.124985	0.27805	0.246116	0.0505409	0.000536976	0.0279827	-0.10809	0.208612	0.252402	0.178826	-0.599783	-0.0304726	biosynthetic process;carboxylic acid biosynthetic process;carboxylic acid metabolic process;cellular biosynthetic process;cellular ketone metabolic process;cellular lipid metabolic process;cellular macromolecule metabolic process;cellular metabolic process;cellular process;cellular protein metabolic process;electron transport chain;fatty acid biosynthetic process;fatty acid metabolic process;gene…	acyl carrier activity;binding;calcium ion binding;carboxylic acid binding;catalytic activity;cation binding;fatty acid binding;ion binding;lipid binding;metal ion binding;monocarboxylic acid binding;NADH dehydrogenase (quinone) activity;NADH dehydrogenase (ubiquinone) activity;NADH dehydrogenase activity;oxidoreductase activity;oxidoreductase activity, acting on NADH or NADPH;oxidoreductase activ…	cell part;cytoplasmic part;intracellular organelle lumen;intracellular organelle part;intracellular part;macromolecular complex;membrane;membrane part;membrane-enclosed lumen;mitochondrial inner membrane;mitochondrial matrix;mitochondrial membrane;mitochondrial membrane part;mitochondrial part;mitochondrial respiratory chain complex I;NADH dehydrogenase complex;organelle inner membrane;organelle …	Alzheimer's disease;Huntington's disease;Oxidative phosphorylation;Parkinson's disease		6	6	6	23.7	23.7	23.7	17.417	0	59.417	6441900000	3726700000	2715200000	0.542369
0.326512	0.544125	-0.852654	-1.26931	-0.143483	-0.500697	0.236522	0.469959	NaN	-0.794612	NaN	NaN	-0.859402	-1.27936	-0.144619	-0.50466	0.259262	NaN	-0.800901	0.687121	0.143448	NaN	0.0788622	NaN	0.409603	NaN	0.257936	-0.880324	-1.3105	-0.516945	0.264393	NaN					+	7	7	7	34	34	34	33.382	0	42.626	1051900000	568820000	483050000	0.0346748
-0.172785	0.268948	0.846343	1.2006	0.186948	1.46412	-0.0367865	-0.715782	0.523573	-0.242021	0.802731	-0.0361935	0.92771	1.31602	0.204922	1.60488	-0.0370777	0.57391	-0.243937	-0.241009	0.466861	-0.199009	-0.207078	0.206533	0.0659014	0.445517	-0.444987	0.946073	1.34207	1.63665	-0.0379803	0.897322	metabolic process;oxidation-reduction process	binding;cation binding;ion binding;metal ion binding	cell part;integral to membrane;intrinsic to membrane;membrane part		+	1	1	1	5.4	5.4	5.4	23.973	0	17.148	1685700000	1129800000	555880000	0.0299539
-0.35276	-0.135145	-0.0846586	0.0826332	0.00380299	0.0538996	-0.201655	-0.471594	-0.173485	0.109785	-0.0737369	-0.549073	-0.0853286	0.0905776	0.00416861	0.0590815	-0.203251	-0.174857	0.120339	-0.726787	-0.570092	-0.410962	-0.544142	-0.30266	-0.497969	-0.33687	-0.762648	-0.0874059	0.0923705	0.060251	-0.208199	-0.0761298	cellular component organization;cellular component organization at cellular level;cellular component organization or biogenesis;cellular component organization or biogenesis at cellular level;cellular process;COPI coating of Golgi vesicle;ER to Golgi vesicle-mediated transport;establishment of localization;establishment of localization in cell;establishment of protein localization;Golgi transport…	structural molecule activity	cell part;COPI vesicle coat;cytoplasmic part;cytoplasmic vesicle part;cytosol;Golgi apparatus;Golgi apparatus part;intracellular membrane-bounded organelle;intracellular organelle;intracellular organelle part;intracellular part;macromolecular complex;membrane coat;membrane part;membrane-bounded organelle;nuclear part;nucleoplasm;organelle;organelle part;protein complex;vesicle coat		+	17	17	17	65.9	65.9	65.9	34.482	0	323.31	24086000000	14282000000	9804100000	3.6607e-05
0.207127	-0.27286	-0.218954	NaN	-0.471562	0.0322175	0.0401448	-0.756047	-0.371927	-0.04614	-0.896509	0.304716	-0.220687	NaN	-0.475294	0.0353149	0.0440043	-0.37487	-0.0465052	NaN	0.194025	-0.958923	0.394165	NaN	0.570822	0.210536	0.355335	-0.22606	NaN	0.036014	0.0448753	-0.925602	biological regulation;biosynthetic process;cellular biosynthetic process;cellular macromolecule biosynthetic process;cellular macromolecule metabolic process;cellular metabolic process;cellular nitrogen compound metabolic process;cellular process;cellular response to stimulus;intracellular signal transduction;macromolecule biosynthetic process;macromolecule metabolic process;metabolic process;nit…	binding;DNA binding;nucleic acid binding;nucleic acid binding transcription factor activity;protein binding transcription factor activity;sequence-specific DNA binding transcription factor activity;transcription cofactor activity;transcription factor binding transcription factor activity	cell part;cytoplasm;extracellular region part;intercellular bridge;intracellular organelle part;intracellular part;nuclear part;nucleoplasm;organelle part	Antigen processing and presentation;ko05152;Primary immunodeficiency		6	6	6	45.7	45.7	45.7	24.243	0	21.803	583570000	240800000	342770000	0.466416
0.130246	0.114388	-0.0256606	0.468657	0.339895	0.452592	0.410605	-0.337775	0.478727	0.537434	0.512471	0.000383386	-0.0258637	0.513714	0.372572	0.496104	0.450081	0.524751	0.589103	-0.449431	-0.0489709	-0.276393	-0.249345	-0.00830029	-0.316904	0.148821	-0.172463	-0.0264934	0.523883	0.505924	0.45899	0.57286	anterograde axon cargo transport;anterograde synaptic vesicle transport;antigen processing and presentation;antigen processing and presentation of exogenous antigen;antigen processing and presentation of lipid antigen via MHC class Ib;antigen processing and presentation via MHC class Ib;antigen processing and presentation, exogenous lipid antigen via MHC class Ib;axon cargo transport;biological r…	transporter activity	axon part;cell part;cell projection part;cytoplasmic part;endosomal part;endosome membrane;Golgi apparatus;Golgi apparatus part;Golgi membrane;intracellular membrane-bounded organelle;intracellular organelle;intracellular organelle part;intracellular part;lysosomal membrane;macromolecular complex;membrane;membrane coat;membrane part;membrane-bounded organelle;nuclear part;nucleoplasm;organelle;or…	Lysosome	+	39	39	39	41.5	41.5	41.5	136.65	0	323.31	14395000000	9347500000	5047100000	0.00025257
0.892266	2.5188	-0.0284758	0.642079	1.237	0.196798	1.1339	2.12789	0.899343	-0.768686	-0.08919	1.83889	-0.0287012	0.703809	1.35592	0.215718	1.24291	0.985806	-0.774769	1.31372	1.73017	0.140327	1.11949	0.469561	0.908443	0.316103	1.66556	-0.0293999	0.71774	0.219988	1.26751	-0.0920843	biological regulation;cation transport;cellular metabolic process;cellular process;cellular response to chemical stimulus;cellular response to oxidative stress;cellular response to oxygen radical;cellular response to reactive oxygen species;cellular response to stimulus;cellular response to stress;cellular response to superoxide;copper ion transmembrane transport;copper ion transport;establishmen…	antioxidant activity;binding;catalytic activity;cation binding;cation transmembrane transporter activity;copper ion binding;copper ion transmembrane transporter activity;disulfide oxidoreductase activity;inorganic cation transmembrane transporter activity;ion binding;ion transmembrane transporter activity;metal ion binding;metal ion transmembrane transporter activity;oxidoreductase activity;oxido…	cell part;cytoplasm;cytoplasmic part;cytosol;intracellular membrane-bounded organelle;intracellular organelle;intracellular part;membrane-bounded organelle;nucleus;organelle	Amyotrophic lateral sclerosis (ALS)		11	11	11	41.2	41.2	41.2	29.04	0	53.703	2045300000	1615300000	429920000	0.149644
-0.320126	-0.435773	0.292632	0.121341	-0.483696	-0.0551846	-0.377215	-0.0950852	-0.210854	-0.112916	0.0923102	-0.606958	0.320766	0.133007	-0.487523	-0.0556213	-0.3802	-0.212523	-0.11381	0.160497	0.0163674	0.473172	0.258021	0.0999345	0.579581	0.332204	-0.152128	0.327115	0.13564	-0.0569754	-0.389456	0.103188	biological regulation;biosynthetic process;cellular biosynthetic process;cellular component organization;cellular component organization at cellular level;cellular component organization or biogenesis;cellular component organization or biogenesis at cellular level;cellular macromolecule biosynthetic process;cellular macromolecule metabolic process;cellular metabolic process;cellular nitrogen comp…	adenyl nucleotide binding;adenyl ribonucleotide binding;ATP binding;ATPase activity;ATPase activity, coupled;ATP-dependent DNA helicase activity;ATP-dependent helicase activity;binding;catalytic activity;DNA binding;DNA helicase activity;DNA-dependent ATPase activity;helicase activity;histone binding;hydrolase activity;hydrolase activity, acting on acid anhydrides;hydrolase activity, acting on ac…	cell part;cytoplasm;intracellular membrane-bounded organelle;intracellular organelle;intracellular part;membrane-bounded organelle;nucleus;organelle		+	37	37	1	26.6	26.6	0.9	196.59	0	207.14	3046000000	1850700000	1195300000	0.00294466
-0.346988	-0.0415516	1.06708	0.644905	0.0542082	0.333235	0.248606	0.314499	NaN	0.623531	0.837294	-0.0383824	1.16967	0.706907	0.0594198	0.365272	0.272507	NaN	0.683477	0.846639	0.172651	1.17048	1.12654	1.33753	0.763602	0.274766	0.861584	1.19283	0.720899	0.372502	0.277901	0.935959	anatomical structure development;biological regulation;biosynthetic process;cell differentiation;cellular biosynthetic process;cellular component organization;cellular component organization at cellular level;cellular component organization or biogenesis;cellular component organization or biogenesis at cellular level;cellular developmental process;cellular macromolecule biosynthetic process;cellu…	adenyl nucleotide binding;adenyl ribonucleotide binding;ATP binding;ATPase activity;ATPase activity, coupled;ATP-dependent DNA helicase activity;ATP-dependent helicase activity;binding;catalytic activity;core promoter binding;core promoter sequence-specific DNA binding;DNA binding;DNA helicase activity;DNA-dependent ATPase activity;helicase activity;histone binding;hydrolase activity;hydrolase ac…	cell part;extracellular membrane-bounded organelle;extracellular organelle;extracellular region part;extracellular vesicular exosome;intracellular membrane-bounded organelle;intracellular non-membrane-bounded organelle;intracellular organelle;intracellular organelle part;intracellular part;membrane-bounded organelle;membrane-bounded vesicle;non-membrane-bounded organelle;nuclear part;nucleolus;nu…		+	32	24	24	22.6	18.7	18.7	211.34	0	291.76	6629100000	6279400000	349700000	0.00738173
0.206231	0.259825	1.02543	0.978371	0.124504	1.43018	0.607598	0.444187	0.295787	0.899773	0.581664	NaN	1.12402	1.07243	0.136474	1.56768	0.666012	0.324224	0.986277	0.599067	0.305305	0.493378	0.363427	0.38345	0.613604	0.293878	-0.630816	1.14627	1.09366	1.59871	0.679195	0.650205	biological regulation;cellular component organization;cellular component organization at cellular level;cellular component organization or biogenesis;cellular component organization or biogenesis at cellular level;cellular macromolecule metabolic process;cellular membrane fusion;cellular membrane organization;cellular metabolic process;cellular process;cellular protein metabolic process;cellular …	binding;protein binding;SNAP receptor activity;SNARE binding;transporter activity	cell part;coated vesicle membrane;cytoplasmic part;cytoplasmic vesicle membrane;cytoplasmic vesicle part;endoplasmic reticulum membrane;endoplasmic reticulum part;endosomal part;endosome membrane;ER to Golgi transport vesicle membrane;Golgi apparatus;Golgi apparatus part;Golgi membrane;integral to membrane;intracellular membrane-bounded organelle;intracellular organelle;intracellular organelle pa…	SNARE interactions in vesicular transport	+	8	8	8	50.9	50.9	50.9	24.775	0	47.424	1335600000	933270000	402320000	0.00824501
-0.164212	0.33213	0.15811	1.01467	0.0498986	1.05475	0.23417	-0.205424	1.02324	1.0354	0.508366	0.672903	0.17331	1.11222	0.0546959	1.15615	0.256683	1.12161	1.13494	0.0452429	0.624528	0.560444	0.507219	0.311279	0.100357	0.513264	-0.0408113	0.176741	1.13424	1.17904	0.261764	0.568271	biological adhesion;biological regulation;catabolic process;cell adhesion;cell migration;cell motility;cell projection organization;cellular catabolic process;cellular component assembly;cellular component movement;cellular component organization;cellular component organization at cellular level;cellular component organization or biogenesis;cellular component organization or biogenesis at cellula…	adenyl nucleotide binding;adenyl ribonucleotide binding;ATP binding;ATPase activity;binding;catalytic activity;cytoskeletal protein binding;hydrolase activity;hydrolase activity, acting on acid anhydrides;hydrolase activity, acting on acid anhydrides, in phosphorus-containing anhydrides;kinesin binding;nucleoside-triphosphatase activity;nucleotide binding;protein binding;purine nucleotide binding…	cell junction;cell part;cell projection part;clathrin-coated vesicle;coated vesicle;cytoplasmic membrane-bounded vesicle;cytoplasmic part;cytoplasmic vesicle;cytoplasmic vesicle membrane;cytoplasmic vesicle part;cytoskeleton;endoplasmic reticulum;endoplasmic reticulum lumen;endoplasmic reticulum part;envelope;extracellular membrane-bounded organelle;extracellular organelle;extracellular region pa…			9	9	9	29.5	29.5	29.5	37.808	0	34.918	4155800000	2814300000	1341600000	0.308577
-0.611724	-0.629695	-0.244174	-0.204411	0.122069	0.904587	0.53186	-0.109097	0.39949	0.622434	0.153726	-0.317156	-0.246106	-0.206028	0.133805	0.991554	0.582994	0.437897	0.682275	-0.174557	-0.0367605	-0.280888	-0.354857	-0.509839	-0.528232	0.375242	-0.236986	-0.252097	-0.211044	1.01118	0.594533	0.171841	cellular component assembly;cellular component organization;cellular component organization at cellular level;cellular component organization or biogenesis;cellular component organization or biogenesis at cellular level;cellular macromolecule metabolic process;cellular membrane organization;cellular metabolic process;cellular process;cellular protein metabolic process;chaperone mediated protein f…	adenyl nucleotide binding;adenyl ribonucleotide binding;ATP binding;ATPase activity;binding;catalytic activity;hydrolase activity;hydrolase activity, acting on acid anhydrides;hydrolase activity, acting on acid anhydrides, in phosphorus-containing anhydrides;nucleoside-triphosphatase activity;nucleotide binding;purine nucleotide binding;purine ribonucleoside triphosphate binding;purine ribonucleo…	cell part;cytoplasmic part;endoplasmic reticulum;endoplasmic reticulum lumen;endoplasmic reticulum part;envelope;extracellular membrane-bounded organelle;extracellular organelle;extracellular region part;extracellular vesicular exosome;intracellular membrane-bounded organelle;intracellular organelle;intracellular organelle lumen;intracellular organelle part;intracellular part;membrane;membrane-bo…			8	8	8	28	28	28	37.978	0	37.39	1185300000	721720000	463570000	0.0948256
-0.11261	NaN	0.919177	0.21411	0.235388	0.70182	0.139361	-0.2688	-0.283161	0.571098	NaN	-0.143717	1.00755	0.234694	0.258019	0.769293	0.152759	-0.285402	0.626003	-0.618022	-0.750004	-0.136922	NaN	0.00134778	-1.28583	NaN	-0.393665	1.02749	0.23934	0.78452	0.155783	NaN	cellular component organization;cellular component organization at cellular level;cellular component organization or biogenesis;cellular component organization or biogenesis at cellular level;cellular membrane fusion;cellular membrane organization;cellular process;endosome transport;establishment of localization;establishment of localization in cell;establishment of protein localization;Golgi org…	binding;protein binding;SNAP receptor activity;SNARE binding;syntaxin binding	adherens junction;anchoring junction;cell junction;cell part;cell-substrate adherens junction;cell-substrate junction;cytoplasm;cytoplasmic part;cytosol;endomembrane system;focal adhesion;Golgi apparatus;Golgi apparatus part;Golgi cisterna;Golgi membrane;integral to membrane;intracellular membrane-bounded organelle;intracellular non-membrane-bounded organelle;intracellular organelle;intracellular…	SNARE interactions in vesicular transport	+	7	7	1	32.2	32.2	3.6	34.812	0	19.669	920840000	613400000	307440000	0.00114473
-0.497968	0.903519	-0.0156963	0.725857	0.754897	0.0329155	0.00131735	-0.536548	0.435464	0.865445	0.282792	-0.17566	-0.0158205	0.795641	0.827473	0.03608	0.001444	0.47733	0.948649	-0.761142	0.319083	-0.679788	-0.417972	0.0517782	-0.447944	-0.610289	-0.74095	-0.0162057	0.81139	0.0367941	0.00147258	0.316115	axon guidance;biological regulation;cell activation;cell communication;cell surface receptor linked signaling pathway;cell-cell signaling;cellular component disassembly;cellular component disassembly at cellular level;cellular component organization;cellular component organization at cellular level;cellular component organization or biogenesis;cellular component organization or biogenesis at cell…	binding;catalytic activity;cation binding;endopeptidase activity;enzyme binding;hydrolase activity;identical protein binding;integrin binding;ion binding;kinase binding;metal ion binding;metalloendopeptidase activity;metallopeptidase activity;peptidase activity;peptidase activity, acting on L-amino acid peptides;protein binding;protein complex binding;protein dimerization activity;protein homodim…	adherens junction;anchoring junction;cell junction;cell part;cell surface;cell-substrate adherens junction;cell-substrate junction;cytoplasm;cytoplasmic membrane-bounded vesicle;cytoplasmic part;cytoplasmic vesicle;cytoskeletal part;endoplasmic reticulum part;extracellular membrane-bounded organelle;extracellular organelle;extracellular region part;extracellular vesicular exosome;focal adhesion;G…	Alzheimer's disease;Epithelial cell signaling in Helicobacter pylori infection	+	27	27	27	50.3	50.3	50.3	84.141	0	217.37	7284800000	4482100000	2802600000	0.0156655
1.24667	0.331023	-0.573076	-0.566757	1.31764	0.977127	0.843504	1.0809	0.484309	0.807426	0.889998	1.2029	-0.577611	-0.571242	1.44431	1.07107	0.924599	0.530871	0.885052	0.641432	0.748445	-0.986065	-0.209356	-0.189498	0.82098	-1.15273	0.498524	-0.591673	-0.585149	1.09227	0.9429	0.994873	activation of caspase activity;activation of caspase activity by cytochrome c;anatomical structure development;anatomical structure formation involved in morphogenesis;apoptosis;biological regulation;cell death;cellular process;cellular response to biotic stimulus;cellular response to endogenous stimulus;cellular response to stimulus;death;developmental process;forebrain development;nervous syste…	adenyl nucleotide binding;adenyl ribonucleotide binding;ADP binding;apoptotic protease activator activity;ATP binding;binding;caspase activator activity;caspase regulator activity;enzyme activator activity;enzyme regulator activity;nucleotide binding;peptidase activator activity;peptidase regulator activity;purine nucleotide binding;purine ribonucleoside triphosphate binding;purine ribonucleotide…	apoptosome;cell part;cytoplasmic part;cytosol;cytosolic part;extracellular membrane-bounded organelle;extracellular organelle;extracellular region part;extracellular vesicular exosome;intracellular membrane-bounded organelle;intracellular organelle;intracellular part;macromolecular complex;membrane-bounded organelle;membrane-bounded vesicle;nucleus;organelle;protein complex;vesicle	Alzheimer's disease;Amyotrophic lateral sclerosis (ALS);Apoptosis;Huntington's disease;ko05152;p53 signaling pathway;Parkinson's disease;Small cell lung cancer		32	32	32	33.9	33.9	33.9	137.07	0	202.15	3002100000	2140800000	861260000	0.197834
-0.209737	-0.74983	-0.464755	NaN	-0.668976	-0.783727	NaN	-0.432926	-0.292078	-0.953326	-0.963394	NaN	-0.468433	NaN	-0.67427	-0.78993	NaN	-0.294389	-0.96087	-0.669032	-0.903904	-0.514464	NaN	NaN	-0.548049	NaN	NaN	-0.479837	NaN	-0.809161	NaN	-0.994658	activation of immune response;activation of innate immune response;activation of JUN kinase activity;activation of MAPK activity;apoptosis;biological regulation;cell death;cellular macromolecule metabolic process;cellular metabolic process;cellular process;cellular protein metabolic process;cellular response to stimulus;cellular response to stress;death;defense response;immune response;immune res…	adenyl nucleotide binding;adenyl ribonucleotide binding;ATP binding;binding;catalytic activity;cation binding;enzyme binding;ion binding;JUN kinase kinase activity;kinase activity;kinase binding;magnesium ion binding;MAP kinase kinase activity;metal ion binding;nucleotide binding;phosphatase binding;phosphotransferase activity, alcohol group as acceptor;protein binding;protein kinase activity;pro…	cell part;cytoplasm;cytoplasmic part;cytosol;intracellular;intracellular membrane-bounded organelle;intracellular organelle;intracellular part;membrane-bounded organelle;nucleus;organelle	ErbB signaling pathway;Fc epsilon RI signaling pathway;GnRH signaling pathway;MAPK signaling pathway;Neurotrophin signaling pathway;Osteoclast differentiation;Protein processing in endoplasmic reticulum;T cell receptor signaling pathway;Toll-like receptor signaling pathway		4	4	4	12.9	12.9	12.9	47.484	0	16.431	408150000	209310000	198840000	0.449738
-0.914343	0.0196654	0.12355	0.149515	-0.72728	0.321655	-0.292079	-0.929335	0.129487	0.535038	-0.0211562	-0.972378	0.135428	0.163889	-0.733035	0.352579	-0.294391	0.141936	0.586476	-0.433822	-0.935905	-0.562935	-0.6388	-0.551886	-0.684942	-0.0759753	-0.269269	0.138109	0.167133	0.359558	-0.301557	-0.0218428	acyl-CoA metabolic process;bile acid biosynthetic process;bile acid metabolic process;biosynthetic process;carboxylic acid biosynthetic process;carboxylic acid catabolic process;carboxylic acid metabolic process;catabolic process;cellular biosynthetic process;cellular catabolic process;cellular component organization;cellular component organization at cellular level;cellular component organizatio…	acyl-CoA hydrolase activity;acyl-CoA thioesterase activity;binding;carboxylic ester hydrolase activity;catalytic activity;choloyl-CoA hydrolase activity;CoA hydrolase activity;hydrolase activity;hydrolase activity, acting on ester bonds;palmitoyl-CoA hydrolase activity;protein binding;receptor binding;thiolester hydrolase activity	cell part;cytoplasmic part;intracellular membrane-bounded organelle;intracellular organelle;intracellular organelle lumen;intracellular organelle part;intracellular part;membrane-bounded organelle;membrane-enclosed lumen;microbody lumen;microbody part;mitochondrion;organelle;organelle lumen;organelle part;peroxisomal matrix;peroxisomal part	Peroxisome	+	9	9	9	39.2	39.2	39.2	35.914	0	51.921	2777300000	1622100000	1155200000	0.0353603
-0.362018	-1.08424	-1.2145	-1.82684	-0.631494	-1.07798	-0.656185	-0.5297	-1.14194	-1.56253	-1.22153	-0.93311	-1.22411	-1.8413	-0.636491	-1.08651	-0.661378	-1.15098	-1.5749	-1.05318	-1.20615	-0.917609	-1.65744	-1.53324	-1.041	-1.60253	-0.796638	-1.25391	-1.88612	-1.11296	-0.67748	-1.26118	biological regulation;cellular process;cellular response to chemical stimulus;cellular response to endogenous stimulus;cellular response to growth factor stimulus;cellular response to organic substance;cellular response to stimulus;cellular response to transforming growth factor beta stimulus;negative regulation of biological process;negative regulation of cell proliferation;negative regulation o…	acetyltransferase activator activity;beta-tubulin binding;binding;carbohydrate binding;cytoskeletal protein binding;DNA binding;enzyme activator activity;enzyme regulator activity;glycosaminoglycan binding;heparin binding;nucleic acid binding;pattern binding;polysaccharide binding;protein binding;tubulin binding	cell part;cytoplasm;extracellular membrane-bounded organelle;extracellular organelle;extracellular region part;extracellular vesicular exosome;intracellular membrane-bounded organelle;intracellular organelle;intracellular part;membrane-bounded organelle;membrane-bounded vesicle;nucleus;organelle;vesicle			12	12	12	76.8	76.8	76.8	14.285	0	119.82	6523300000	3206200000	3317100000	0.135608
-0.61269	-0.895991	-0.823623	-1.00917	-0.752572	-1.34137	-0.837174	-0.862855	-0.964138	-1.43493	-1.10235	-0.825603	-0.830141	-1.01715	-0.758528	-1.35199	-0.843799	-0.971768	-1.44628	-1.01559	-0.968687	-0.919271	-0.9141	-1.17783	-1.073	-0.719812	-0.449645	-0.850351	-1.04191	-1.3849	-0.864342	-1.13812	biological regulation;biosynthetic process;cell activation;cell proliferation;cellular biosynthetic process;cellular component assembly;cellular component assembly at cellular level;cellular component organization;cellular component organization at cellular level;cellular component organization or biogenesis;cellular component organization or biogenesis at cellular level;cellular macromolecular c…	arginine N-methyltransferase activity;binding;catalytic activity;chromatin binding;core promoter binding;core promoter sequence-specific DNA binding;DNA binding;histone methyltransferase activity;histone-arginine N-methyltransferase activity;methyltransferase activity;N-methyltransferase activity;nucleic acid binding;protein binding;protein binding transcription factor activity;protein dimerizati…	cell part;cytoplasm;cytoplasmic part;cytosol;intracellular membrane-bounded organelle;intracellular organelle;intracellular organelle part;intracellular part;macromolecular complex;membrane-bounded organelle;methylosome;methyltransferase complex;nuclear part;nucleoplasm;nucleus;organelle;organelle part;protein complex	Cell cycle - yeast;RNA transport		23	23	23	45.7	45.7	45.7	72.683	0	302.9	12970000000	6414300000	6556100000	0.172048
1.70222	0.418446	-0.846362	-0.798991	1.09163	-0.123227	0.488289	1.3095	-0.274507	0.0341505	-0.548661	0.577136	-0.85306	-0.805314	1.19658	-0.124202	0.535233	-0.27668	0.0374337	1.145	0.680495	-0.321857	-0.0385372	0.0173875	0.472935	-0.789354	0.204867	-0.873828	-0.824919	-0.127226	0.545828	-0.566465	acid secretion;actin cytoskeleton organization;actin filament-based process;activation of adenylate cyclase activity;activation of adenylate cyclase activity by dopamine receptor signaling pathway;activation of adenylate cyclase activity by G-protein signaling pathway;activation of phospholipase C activity;activation of phospholipase C activity by dopamine receptor signaling pathway;activation of…	adrenergic receptor binding;beta-2 adrenergic receptor binding;beta-catenin binding;binding;channel regulator activity;chloride channel regulator activity;enzyme binding;G-protein-coupled receptor binding;growth factor receptor binding;PDZ domain binding;phosphatase binding;protein binding;protein domain specific binding;protein self-association;receptor binding	actin cytoskeleton;apical plasma membrane;brush border membrane;cell part;cell periphery;cell projection;cell projection membrane;cell projection part;centrosome;cytoplasm;cytoplasmic part;cytoskeletal part;cytoskeleton;endomembrane system;extracellular membrane-bounded organelle;extracellular organelle;extracellular region part;extracellular vesicular exosome;filopodium;intracellular membrane-bo…			21	21	21	71.2	71.2	71.2	38.868	0	323.31	17103000000	12144000000	4958900000	0.125945
0.91185	0.698091	0.745843	1.50655	1.10731	2.17837	1.43906	0.920068	1.49176	1.93413	1.70437	1.01004	0.817549	1.65139	1.21377	2.3878	1.57741	1.63518	2.12008	0.617419	1.30072	0.323959	1.18775	1.14321	0.842114	0.749261	0.939757	0.833731	1.68408	2.43506	1.60864	1.90521	anatomical structure development;anatomical structure homeostasis;biological regulation;bone resorption;catabolic process;cell differentiation;cellular catabolic process;cellular component organization;cellular component organization at cellular level;cellular component organization or biogenesis;cellular component organization or biogenesis at cellular level;cellular developmental process;cellul…	binding;catalytic activity;cation binding;endopeptidase activity;exopeptidase activity;hydrolase activity;ion binding;metal ion binding;peptidase activity;peptidase activity, acting on L-amino acid peptides;peptide binding;serine hydrolase activity;serine-type endopeptidase activity;serine-type peptidase activity;tripeptidyl-peptidase activity	cell part;cytoplasmic membrane-bounded vesicle;cytoplasmic part;cytoplasmic vesicle;extracellular membrane-bounded organelle;extracellular organelle;extracellular region part;extracellular vesicular exosome;intracellular membrane-bounded organelle;intracellular organelle;intracellular organelle lumen;intracellular organelle part;intracellular part;lysosomal lumen;lysosome;lytic vacuole;melanosome…	Lysosome	+	9	9	9	29.1	29.1	29.1	61.247	0	276.3	36255000000	28275000000	7980200000	0.00588611
-0.357076	-0.403305	0.134637	-0.0637022	-0.532535	-0.144133	-0.410785	-0.114575	-0.0661678	-0.261482	-0.00959409	-0.354051	0.147581	-0.0642063	-0.53675	-0.145274	-0.414036	-0.0666915	-0.263551	-0.0632387	-0.151752	0.186463	0.131587	0.463932	0.133022	0.480964	-0.0590405	0.150502	-0.0657694	-0.148811	-0.424116	-0.00990543	biological regulation;biosynthetic process;cellular biosynthetic process;cellular macromolecule biosynthetic process;cellular macromolecule metabolic process;cellular metabolic process;cellular nitrogen compound metabolic process;cellular process;macromolecule biosynthetic process;macromolecule metabolic process;metabolic process;negative regulation of biological process;negative regulation of bi…	binding;protein binding;protein binding transcription factor activity;repressing transcription factor binding;RNA polymerase II repressing transcription factor binding;RNA polymerase II transcription cofactor activity;RNA polymerase II transcription corepressor activity;RNA polymerase II transcription factor binding;RNA polymerase II transcription factor binding transcription factor activity;RNA …	actin cytoskeleton;cell part;cytoskeleton;intracellular membrane-bounded organelle;intracellular non-membrane-bounded organelle;intracellular organelle;intracellular organelle part;intracellular part;membrane-bounded organelle;non-membrane-bounded organelle;nuclear part;nucleolus;nucleus;organelle;organelle part	Spliceosome	+	41	41	38	36.8	36.8	34.7	121.69	0	220.36	18783000000	11276000000	7506500000	0.00404682
-0.107166	-0.137372	-1.10129	-0.743961	-0.251486	-1.01974	-0.392191	-0.335582	-0.511203	-1.46731	-1.1254	-0.238674	-1.11	-0.749849	-0.253476	-1.02781	-0.395295	-0.515249	-1.47893	-0.123521	-0.441681	-0.229592	-0.379694	-0.724205	-0.934315	-0.94191	0.128016	-1.13703	-0.768104	-1.05284	-0.404918	-1.16192	establishment of localization;establishment of localization in cell;establishment of protein localization;intracellular protein transport;intracellular transport;protein transport;transport	binding;nuclear localization sequence binding;peptide binding;signal sequence binding	cell part;cytoplasm;intracellular membrane-bounded organelle;intracellular organelle;intracellular part;membrane-bounded organelle;nucleus;organelle		+	27	20	20	47.2	40	40	100.41	0	153.05	2571500000	1416900000	1154600000	0.0458774
-0.215979	0.263971	0.301365	-0.140057	-0.62148	-0.439493	-0.61699	-0.0719442	-0.43105	-0.61645	0.127423	-0.37262	0.330338	-0.141166	-0.626399	-0.442971	-0.621872	-0.434462	-0.621329	0.0297716	-0.403815	0.62495	0.192271	-0.11786	0.20997	0.316859	0.536838	0.336877	-0.144602	-0.453755	-0.637012	0.142439	biological regulation;biosynthetic process;cellular biosynthetic process;cellular macromolecule biosynthetic process;cellular macromolecule metabolic process;cellular metabolic process;cellular nitrogen compound metabolic process;cellular process;defense response;defense response to virus;gene expression;immune effector process;immune response;immune system process;innate immune response;macromol…	binding;catalytic activity;cation binding;chromatin binding;DNA binding;DNA-directed RNA polymerase activity;ion binding;metal ion binding;nucleic acid binding;nucleoside binding;nucleotidyltransferase activity;ribonucleoside binding;RNA polymerase activity;transferase activity;transferase activity, transferring phosphorus-containing groups;transition metal ion binding;zinc ion binding	cell part;cytoplasmic part;cytosol;DNA-directed RNA polymerase complex;DNA-directed RNA polymerase III complex;intracellular organelle part;intracellular part;macromolecular complex;membrane;nuclear DNA-directed RNA polymerase complex;nuclear part;nucleoplasm;nucleoplasm part;organelle part;protein complex;RNA polymerase complex	Cytosolic DNA-sensing pathway;Purine metabolism;Pyrimidine metabolism;RNA polymerase	+	17	16	16	17.3	16.6	16.6	155.64	0	72.836	1032000000	613370000	418610000	0.0453184
0.244513	0.0722307	-0.541217	-0.737259	0.376013	-0.0142376	0.327914	0.107363	-0.337694	-0.251978	-0.144739	-0.00360315	-0.545501	-0.743094	0.412163	-0.0143503	0.359439	-0.340367	-0.253972	-0.126977	-0.0656828	-0.496293	-0.509364	-0.770888	-0.256734	-0.529601	0.153567	-0.558781	-0.761184	-0.0146996	0.366554	-0.149436	activation of immune response;activation of innate immune response;anaphase-promoting complex-dependent proteasomal ubiquitin-dependent protein catabolic process;antigen processing and presentation;antigen processing and presentation of exogenous antigen;antigen processing and presentation of exogenous peptide antigen;antigen processing and presentation of exogenous peptide antigen via MHC class …	binding;catalytic activity;endopeptidase activity;hydrolase activity;identical protein binding;peptidase activity;peptidase activity, acting on L-amino acid peptides;protein binding;threonine-type endopeptidase activity;threonine-type peptidase activity	cell part;cytoplasm;cytoplasmic part;cytosol;extracellular membrane-bounded organelle;extracellular organelle;extracellular region part;extracellular vesicular exosome;intracellular membrane-bounded organelle;intracellular organelle;intracellular organelle part;intracellular part;macromolecular complex;membrane-bounded organelle;membrane-bounded vesicle;nuclear part;nucleoplasm;nucleus;organelle;…	Proteasome		16	16	16	60.1	60.1	60.1	27.887	0	323.31	42121000000	26508000000	15613000000	0.30061
-1.17921	-1.32883	-0.423152	-0.28699	-1.22443	-1.12687	-1.10597	-1.47245	-0.529952	-0.422003	-0.842317	-1.57757	-0.426501	-0.289262	-1.23412	-1.13579	-1.11472	-0.534146	-0.425343	-1.61403	-0.910949	-1.28554	-1.20141	-0.82895	-1.53439	-0.321639	-1.42539	-0.436884	-0.296304	-1.16344	-1.14186	-0.869651	cellular process;establishment of localization;establishment of localization in cell;establishment of protein localization;Golgi vesicle transport;intracellular transport;post-Golgi vesicle-mediated transport;protein transport;response to chemical stimulus;response to external stimulus;response to extracellular stimulus;response to nutrient;response to nutrient levels;response to retinoic acid;re…	binding;enzyme binding;protein binding;ubiquitin protein ligase binding	cell part;cytoplasmic part;extracellular membrane-bounded organelle;extracellular organelle;extracellular region part;extracellular vesicular exosome;Golgi apparatus part;Golgi membrane;integral to membrane;intracellular organelle part;intracellular part;intrinsic to membrane;membrane;membrane part;membrane-bounded organelle;membrane-bounded vesicle;organelle;organelle membrane;organelle part;ves…			11	11	3	41.5	41.5	19.6	38.287	0	263.54	8999400000	4243800000	4755500000	0.274861
-1.70912	-1.63652	NaN	-0.795532	-0.393629	NaN	-1.65306	NaN	-1.07592	-0.57529	-1.04244	NaN	NaN	-0.801827	-0.396744	NaN	-1.66614	-1.08444	-0.579843	-2.39918	-1.97441	NaN	NaN	-0.942515	NaN	NaN	-2.35811	NaN	-0.821348	NaN	-1.7067	-1.07627	amine biosynthetic process;amine metabolic process;biosynthetic process;carboxylic acid biosynthetic process;carboxylic acid metabolic process;cellular amine metabolic process;cellular amino acid biosynthetic process;cellular amino acid metabolic process;cellular biosynthetic process;cellular ketone metabolic process;cellular metabolic process;cellular modified amino acid biosynthetic process;cel…	5-oxoprolinase (ATP-hydrolyzing) activity;adenyl nucleotide binding;adenyl ribonucleotide binding;ATP binding;binding;catalytic activity;hydrolase activity;hydrolase activity, acting on carbon-nitrogen (but not peptide) bonds;hydrolase activity, acting on carbon-nitrogen (but not peptide) bonds, in cyclic amides;nucleotide binding;purine nucleotide binding;purine ribonucleoside triphosphate bindi…	cell part;cytoplasmic part;cytosol;intracellular part	Glutathione metabolism		9	9	9	9.5	9.5	9.5	137.46	0	24.714	364100000	184880000	179220000	0.106181
-1.42388	-0.0680149	0.504689	0.312818	-0.556879	0.101271	0.047141	-0.578305	-0.411314	0.462813	0.194403	-0.926687	0.55321	0.342892	-0.561286	0.111007	0.0516731	-0.414569	0.507308	-0.938451	-0.457737	-0.619566	-0.224405	0.13615	-0.805212	0.245107	-0.920199	0.56416	0.349679	0.113204	0.0526959	0.217311	amine catabolic process;amine metabolic process;branched chain family amino acid catabolic process;branched chain family amino acid metabolic process;carboxylic acid catabolic process;carboxylic acid metabolic process;catabolic process;cellular amine metabolic process;cellular amino acid catabolic process;cellular amino acid metabolic process;cellular catabolic process;cellular ketone metabolic p…	[3-methyl-2-oxobutanoate dehydrogenase (acetyl-transferring)] kinase activity;adenyl nucleotide binding;adenyl ribonucleotide binding;ATP binding;binding;catalytic activity;kinase activity;nucleotide binding;phosphotransferase activity, alcohol group as acceptor;protein kinase activity;protein serine/threonine kinase activity;purine nucleotide binding;purine ribonucleoside triphosphate binding;pu…	cell part;cytoplasmic part;dihydrolipoyl dehydrogenase complex;intracellular membrane-bounded organelle;intracellular organelle;intracellular organelle part;intracellular part;macromolecular complex;membrane-bounded organelle;mitochondrial alpha-ketoglutarate dehydrogenase complex;mitochondrial part;mitochondrial tricarboxylic acid cycle enzyme complex;mitochondrion;organelle;organelle part;prote…		+	9	9	9	40	40	40	37.767	0	63.132	1521500000	859500000	662030000	0.0197731
0.709914	0.112874	1.24575	0.89889	0.345018	0.948151	0.76169	0.707011	0.477549	0.686611	0.958199	0.273902	1.36552	0.985309	0.378188	1.03931	0.834919	0.523461	0.752622	0.583928	0.649059	0.540866	1.3265	0.587322	0.679238	0.740446	0.468271	1.39254	1.00481	1.05988	0.851445	1.07111	biological regulation;cellular metabolic process;cellular process;cellular response to stimulus;lipid metabolic process;metabolic process;oxidation-reduction process;primary metabolic process;regulation of biological process;regulation of cellular process;response to stimulus;signal transduction;small molecule metabolic process;xenobiotic metabolic process	antioxidant activity;catalytic activity;glutathione peroxidase activity;glutathione transferase activity;oxidoreductase activity;oxidoreductase activity, acting on peroxide as acceptor;peroxidase activity;transferase activity;transferase activity, transferring alkyl or aryl (other than methyl) groups	cell part;cytoplasmic part;endoplasmic reticulum membrane;endoplasmic reticulum part;envelope;extracellular membrane-bounded organelle;extracellular organelle;extracellular region part;extracellular vesicular exosome;integral to membrane;intracellular membrane-bounded organelle;intracellular organelle;intracellular organelle part;intracellular part;intrinsic to membrane;membrane;membrane part;mem…	Drug metabolism - cytochrome P450;Glutathione metabolism;Metabolism of xenobiotics by cytochrome P450	+	5	5	5	34.2	34.2	34.2	16.516	0	102.44	4198200000	3049400000	1148800000	0.0100761
0.66904	-0.152842	-0.814089	-0.581115	0.407331	-0.0880907	0.567047	0.50612	-0.133325	-0.273974	-0.270346	0.485125	-0.820531	-0.585714	0.446492	-0.0887879	0.621563	-0.13438	-0.276142	0.0822118	0.0348132	-0.357614	-0.56271	-0.724073	-0.254232	-0.534688	0.0224624	-0.840507	-0.599973	-0.0909494	0.633866	-0.279119	activation of immune response;activation of innate immune response;antigen receptor-mediated signaling pathway;B cell homeostasis;biological regulation;cell surface receptor linked signaling pathway;cellular macromolecule metabolic process;cellular metabolic process;cellular process;cellular protein metabolic process;cellular response to chemical stimulus;cellular response to cytokine stimulus;ce…	adenyl nucleotide binding;adenyl ribonucleotide binding;ATP binding;binding;catalytic activity;enzyme binding;identical protein binding;IkappaB kinase activity;kinase activity;kinase binding;nucleotide binding;phosphotransferase activity, alcohol group as acceptor;protein binding;protein dimerization activity;protein heterodimerization activity;protein homodimerization activity;protein kinase act…	CD40 receptor complex;cell part;cytoplasm;cytoplasmic part;cytosol;cytosolic part;IkappaB kinase complex;internal side of plasma membrane;intracellular membrane-bounded organelle;intracellular organelle;intracellular part;macromolecular complex;membrane part;membrane raft;membrane-bounded organelle;nucleus;organelle;plasma membrane part;protein complex;receptor complex	Acute myeloid leukemia;Adipocytokine signaling pathway;Apoptosis;B cell receptor signaling pathway;Chagas disease (American trypanosomiasis);Chemokine signaling pathway;Chronic myeloid leukemia;Cytosolic DNA-sensing pathway;Epithelial cell signaling in Helicobacter pylori infection;Hepatitis C;Insulin signaling pathway;MAPK signaling pathway;Neurotrophin signaling pathway;NOD-like receptor signal…		28	28	27	54.1	54.1	53	86.563	0	246.01	6451100000	4116000000	2335100000	0.171574
-1.47313	-0.403305	-0.0550609	-0.352393	-1.33879	-0.902453	-1.5884	-1.213	-0.710878	-0.479737	-0.713041	-1.95779	-0.0554967	-0.355182	-1.34938	-0.909595	-1.60097	-0.716504	-0.483534	-1.04223	-2.0712	-0.413052	-0.490276	-0.953948	-0.698235	0.005126	-0.680851	-0.0568477	-0.363829	-0.931739	-1.63994	-0.73618	cellular macromolecule metabolic process;cellular metabolic process;cellular process;cellular protein metabolic process;establishment of localization;establishment of localization in cell;establishment of protein localization;establishment of protein localization in mitochondrion;establishment of protein localization to organelle;intracellular protein transport;intracellular transport;macromolecu…	active transmembrane transporter activity;macromolecule transmembrane transporter activity;P-P-bond-hydrolysis-driven protein transmembrane transporter activity;P-P-bond-hydrolysis-driven transmembrane transporter activity;primary active transmembrane transporter activity;protein transmembrane transporter activity;protein transporter activity;substrate-specific transmembrane transporter activity;…	cell part;cytoplasmic part;integral to membrane;integral to mitochondrial inner membrane;integral to mitochondrial membrane;integral to organelle membrane;intracellular membrane-bounded organelle;intracellular organelle;intracellular organelle part;intracellular part;intrinsic to membrane;intrinsic to mitochondrial inner membrane;intrinsic to organelle membrane;macromolecular complex;membrane;mem…			6	6	6	32.5	32.5	32.5	21.943	0	74.693	2365400000	1049800000	1315600000	0.815282
-1.04749	-1.08394	-1.33784	-1.47832	-1.08906	-0.710399	-0.902686	-0.91763	-1.64906	-1.17157	-1.03453	-0.759499	-1.34843	-1.49002	-1.09768	-0.716021	-0.90983	-1.66211	-1.18084	-0.746357	-1.27394	-1.0102	-1.00482	-1.50549	-0.497211	-0.838896	-1.53315	-1.38126	-1.5263	-0.733453	-0.93198	-1.0681	biological regulation;cellular component assembly;cellular component assembly at cellular level;cellular component organization;cellular component organization at cellular level;cellular component organization or biogenesis;cellular component organization or biogenesis at cellular level;cellular macromolecular complex assembly;cellular macromolecular complex subunit organization;cellular macromol…	acetyltransferase activity;catalytic activity;H4 histone acetyltransferase activity;histone acetyltransferase activity;lysine N-acetyltransferase activity;N-acetyltransferase activity;N-acyltransferase activity;transferase activity;transferase activity, transferring acyl groups;transferase activity, transferring acyl groups other than amino-acyl groups	cell part;chromatin;chromosomal part;cytoplasm;intracellular membrane-bounded organelle;intracellular organelle;intracellular organelle part;intracellular part;macromolecular complex;membrane-bounded organelle;nuclear chromatin;nuclear chromosome part;nuclear matrix;nuclear part;nucleoplasm;nucleus;organelle;organelle part;protein complex			22	22	21	46.1	46.1	46.1	49.512	0	199.77	15163000000	7213400000	7949400000	0.823919
2.56764	2.5817	0.22109	NaN	1.7867	NaN	1.53009	3.5547	0.573582	0.456697	1.58057	3.15571	0.242346	NaN	1.95848	NaN	1.67719	0.628726	0.500604	3.23968	3.47388	2.44014	1.92083	0.989839	2.23029	NaN	3.84001	0.247143	NaN	NaN	1.71039	1.76682	biological regulation;biosynthetic process;catabolic process;cell surface receptor linked signaling pathway;cellular biosynthetic process;cellular catabolic process;cellular macromolecule biosynthetic process;cellular macromolecule catabolic process;cellular macromolecule metabolic process;cellular metabolic process;cellular nitrogen compound metabolic process;cellular process;cellular protein me…	acid-amino acid ligase activity;catalytic activity;ISG15 ligase activity;ligase activity;ligase activity, forming carbon-nitrogen bonds;small conjugating protein ligase activity;ubiquitin-protein ligase activity	cell part;cytoplasmic part;cytosol;intracellular organelle part;intracellular part;nuclear part;nucleoplasm;organelle part	Parkinson's disease;Ubiquitin mediated proteolysis		8	8	8	53.6	53.6	53.6	17.769	0	67.561	2068500000	1829700000	238780000	0.085543
0.306526	0.523658	0.90786	0.610474	0.204892	0.569456	0.224894	0.591374	0.599371	0.775619	0.808635	0.708156	0.995142	0.669165	0.22459	0.624203	0.246516	0.656995	0.850187	0.324326	0.589956	0.75399	0.755174	0.626513	0.742127	0.570906	0.605216	1.01484	0.682411	0.636559	0.251395	0.903923	anatomical structure development;cell development;cellular developmental process;cellular metabolic process;cellular process;central nervous system neuron development;cerebellar Purkinje cell layer development;developmental process;electron transport chain;forebrain neuron development;generation of precursor metabolites and energy;hippocampus development;hypothalamus development;metabolic process…	catalytic activity;cation transmembrane transporter activity;hydrogen ion transmembrane transporter activity;inorganic cation transmembrane transporter activity;ion transmembrane transporter activity;monovalent inorganic cation transmembrane transporter activity;oxidoreductase activity;oxidoreductase activity, acting on diphenols and related substances as donors;oxidoreductase activity, acting on…	cell part;cytoplasmic part;intracellular membrane-bounded organelle;intracellular organelle;intracellular organelle part;intracellular part;membrane;membrane part;membrane-bounded organelle;mitochondrial inner membrane;mitochondrial membrane;mitochondrial part;mitochondrion;organelle;organelle inner membrane;organelle membrane;organelle part;respiratory chain	Alzheimer's disease;Cardiac muscle contraction;Huntington's disease;Oxidative phosphorylation;Parkinson's disease		5	5	5	53.7	53.7	53.7	9.9062	0	50.049	10298000000	6973400000	3324600000	0.533146
0.670224	0.760935	0.0430794	0.128204	0.488602	0.456322	0.879232	0.375009	0.580174	0.453353	0.10422	0.664369	0.047221	0.14053	0.535576	0.500193	0.963762	0.635952	0.496939	0.170138	0.692898	-0.196429	0.0196722	-0.0303172	-0.0862767	-0.719544	0.613648	0.0481557	0.143312	0.510093	0.982838	0.1165	biological regulation;cell surface receptor linked signaling pathway;cellular component organization;cellular component organization or biogenesis;cellular localization;cellular macromolecule localization;cellular membrane organization;cellular process;cellular protein localization;cellular response to stimulus;endosome to lysosome transport;endosome transport;enzyme linked receptor protein signa…	binding;cation binding;ion binding;metal ion binding;protein binding;protein domain specific binding	cell part;cytoplasm;cytoplasmic membrane-bounded vesicle;cytoplasmic part;cytoplasmic vesicle;cytosol;early endosome;early endosome membrane;endosomal part;endosome;endosome membrane;extracellular membrane-bounded organelle;extracellular organelle;extracellular region part;extracellular vesicular exosome;intracellular membrane-bounded organelle;intracellular organelle;intracellular organelle part…	Endocytosis;Phagosome	+	17	17	17	26.1	26.1	26.1	86.191	0	35.509	3345600000	1878900000	1466700000	0.0413078
0.329091	-2.57338	-0.282535	0.767168	0.421608	NaN	0.627557	0.172131	0.222586	0.0897399	0.123507	-0.378526	-0.284771	0.840924	0.462142	NaN	0.687891	0.243985	0.0983675	0.414734	0.0805047	NaN	-1.27638	-0.367127	0.202387	NaN	NaN	-0.291704	0.857569	NaN	0.701507	0.138061	biological regulation;cell differentiation;cellular component organization;cellular component organization at cellular level;cellular component organization or biogenesis;cellular component organization or biogenesis at cellular level;cellular developmental process;cellular process;cellular response to stimulus;developmental process;establishment of localization;establishment of localization in c…	binding;catalytic activity;GTP binding;GTPase activity;guanyl nucleotide binding;guanyl ribonucleotide binding;hydrolase activity;hydrolase activity, acting on acid anhydrides;hydrolase activity, acting on acid anhydrides, in phosphorus-containing anhydrides;nucleoside-triphosphatase activity;nucleotide binding;purine nucleotide binding;purine ribonucleoside triphosphate binding;purine ribonucleo…	cell part;cytoplasm;cytoplasmic membrane-bounded vesicle;cytoplasmic part;cytoplasmic vesicle;cytoskeleton;extracellular membrane-bounded organelle;extracellular organelle;extracellular region part;extracellular vesicular exosome;Golgi apparatus part;intracellular membrane-bounded organelle;intracellular non-membrane-bounded organelle;intracellular organelle;intracellular organelle part;intracell…			8	7	7	48.8	43.3	43.3	23.155	0	15.029	822230000	531620000	290610000	0.590033
0.851774	0.869454	1.07867	1.18953	0.674465	1.39211	1.04394	0.732311	1.22626	1.5586	0.927034	1.01772	1.18237	1.30389	0.739308	1.52595	1.14431	1.34415	1.70844	0.216326	0.802018	-0.00586634	0.909041	0.453715	0.821625	1.19931	0.61629	1.20577	1.3297	1.55615	1.16696	1.03627	establishment of localization;establishment of localization in cell;establishment of protein localization;intracellular protein transport;intracellular transport;protein transport;transport	protein transporter activity;substrate-specific transporter activity;transporter activity	cell part;cytoplasmic part;endosome;intracellular membrane-bounded organelle;intracellular organelle;intracellular part;membrane-bounded organelle;nucleus;organelle		+	11	11	11	49.2	49.2	49.2	33.01	0	151.15	3259800000	2432500000	827330000	0.000583243
0.786407	0.700633	-0.0740364	0.525048	1.17966	0.561975	0.663347	0.911718	0.26656	0.262985	0.398199	0.820757	-0.0746223	0.575526	1.29307	0.616004	0.727121	0.292187	0.288269	0.525778	0.470466	-0.439615	0.967997	1.01604	-0.00439693	0.146762	0.589649	-0.076439	0.586918	0.628197	0.741514	0.445122	biological regulation;cell cycle;cell cycle phase;cell cycle process;cellular component organization;cellular component organization at cellular level;cellular component organization or biogenesis;cellular component organization or biogenesis at cellular level;cellular macromolecule metabolic process;cellular metabolic process;cellular process;cellular protein metabolic process;cellular response …	14-3-3 protein binding;binding;enzyme binding;enzyme inhibitor activity;enzyme regulator activity;kinase binding;molecular transducer activity;phosphatase regulator activity;protein binding;protein kinase binding;signal transducer activity	actin cytoskeleton;adherens junction;anchoring junction;cell junction;cell part;cell-substrate adherens junction;cell-substrate junction;centrosome;chromosomal part;contractile fiber;cytoplasm;cytoplasmic part;cytoskeletal part;cytoskeleton;cytosol;focal adhesion;intracellular non-membrane-bounded organelle;intracellular organelle;intracellular organelle part;intracellular part;kinetochore;macrom…	Focal adhesion;Long-term potentiation;Regulation of actin cytoskeleton;Vascular smooth muscle contraction		37	37	37	46.5	46.5	46.5	109.1	0	323.31	5053100000	3510100000	1543000000	0.580502
-0.744045	-0.802437	0.106282	-0.536945	-3.58385	-0.413904	-1.75308	-0.246668	0.0229076	-0.657155	-0.72473	-0.730163	0.1165	-0.541195	-3.61221	-0.417179	-1.76695	0.0251099	-0.662356	-0.308534	-0.997471	1.32274	0.145534	-1.00126	-0.0867681	0.402269	-0.41838	0.118806	-0.55437	-0.427336	-1.80997	-0.748249	bile acid biosynthetic process;bile acid metabolic process;biosynthetic process;carboxylic acid biosynthetic process;carboxylic acid catabolic process;carboxylic acid metabolic process;catabolic process;cellular biosynthetic process;cellular catabolic process;cellular ketone metabolic process;cellular lipid catabolic process;cellular lipid metabolic process;cellular metabolic process;cellular pro…	acid-thiol ligase activity;adenyl nucleotide binding;adenyl ribonucleotide binding;ATP binding;binding;catalytic activity;enzyme binding;fatty acid ligase activity;fatty acid transporter activity;ligase activity;ligase activity, forming carbon-sulfur bonds;lipid transporter activity;long-chain fatty acid-CoA ligase activity;nucleotide binding;phytanate-CoA ligase activity;pristanate-CoA ligase ac…	cell part;cytoplasmic part;endoplasmic reticulum lumen;endoplasmic reticulum membrane;endoplasmic reticulum part;extracellular membrane-bounded organelle;extracellular organelle;extracellular region part;extracellular vesicular exosome;integral to endoplasmic reticulum membrane;integral to membrane;integral to organelle membrane;integral to peroxisomal membrane;intracellular membrane-bounded orga…	Peroxisome;PPAR signaling pathway		25	25	25	42.9	42.9	42.9	70.311	0	293.69	4923500000	2778400000	2145000000	0.465665
0.32773	-0.0125675	-0.661772	-0.254551	0.691587	0.112701	0.421143	0.250449	-0.229434	0.03791	-0.0620046	-0.303108	-0.667009	-0.256566	0.758076	0.123536	0.461632	-0.23125	0.0415546	-0.154348	-0.0305459	-0.679878	-0.651099	-0.531429	-0.483127	-0.880751	-0.231517	-0.683248	-0.262812	0.125982	0.470769	-0.0640168	anatomical structure development;anatomical structure morphogenesis;biological regulation;cell cycle;cell development;cell differentiation;cellular component disassembly;cellular component disassembly at cellular level;cellular component organization;cellular component organization at cellular level;cellular component organization or biogenesis;cellular component organization or biogenesis at cel…	adenyl nucleotide binding;adenyl ribonucleotide binding;ATP binding;binding;catalytic activity;kinase activity;nucleotide binding;phosphotransferase activity, alcohol group as acceptor;protein kinase activity;protein serine/threonine kinase activity;purine nucleotide binding;purine ribonucleoside triphosphate binding;purine ribonucleotide binding;ribonucleotide binding;transferase activity;transf…	adherens junction;anchoring junction;cell junction;cell part;cell-substrate adherens junction;cell-substrate junction;cytoplasmic part;focal adhesion;Golgi apparatus;intracellular membrane-bounded organelle;intracellular organelle;intracellular part;membrane;membrane-bounded organelle;organelle;perinuclear region of cytoplasm		+	31	31	31	35.1	35.1	35.1	143.19	0	163.58	3123500000	1928800000	1194700000	0.0463056
-0.342969	-0.691651	-0.12196	-0.354906	-0.682303	-0.486628	-0.962564	-0.11744	-0.548591	-0.822866	-0.142119	-0.545262	-0.122925	-0.357715	-0.687703	-0.49048	-0.970182	-0.552932	-0.829378	0.00685363	-0.913352	0.393364	-0.2252	-0.182039	0.287835	0.290352	-0.420411	-0.125918	-0.366423	-0.50242	-0.993801	-0.146731	biological regulation;biosynthetic process;cellular biosynthetic process;cellular macromolecule biosynthetic process;cellular macromolecule metabolic process;cellular metabolic process;cellular nitrogen compound metabolic process;cellular process;macromolecule biosynthetic process;macromolecule metabolic process;metabolic process;nitrogen compound metabolic process;nucleic acid metabolic process;…	binding;DNA binding;double-stranded DNA binding;mRNA binding;nucleic acid binding;nucleotide binding;poly(A) RNA binding;poly(G) RNA binding;poly-purine tract binding;RNA binding;single-stranded DNA binding;single-stranded RNA binding;structure-specific DNA binding	cell part;cytoplasm;extracellular membrane-bounded organelle;extracellular organelle;extracellular region part;extracellular vesicular exosome;intracellular membrane-bounded organelle;intracellular organelle;intracellular organelle part;intracellular part;macromolecular complex;membrane-bounded organelle;membrane-bounded vesicle;nuclear part;nucleoplasm;nucleus;organelle;organelle part;ribonucleo…			18	17	2	40.5	38.6	10.2	46.437	0	302.89	47240000000	27565000000	19675000000	0.0564907
-0.407124	-0.383158	-0.0802733	-0.329846	-0.541781	-0.387232	-0.92538	-0.0480445	-0.800015	-0.906354	0.0746801	-0.830109	-0.0809086	-0.332457	-0.546068	-0.390296	-0.932703	-0.806346	-0.913527	0.0276173	-1.27057	0.469174	-0.126685	-0.308034	0.402738	0.32928	-0.386494	-0.0828783	-0.34055	-0.399798	-0.95541	0.0834801	biological regulation;biosynthetic process;cellular biosynthetic process;cellular macromolecule biosynthetic process;cellular macromolecule metabolic process;cellular metabolic process;cellular nitrogen compound metabolic process;cellular process;macromolecule biosynthetic process;macromolecule metabolic process;metabolic process;nitrogen compound metabolic process;nucleic acid metabolic process;…	binding;DNA binding;double-stranded DNA binding;mRNA binding;nucleic acid binding;nucleotide binding;poly(A) RNA binding;poly(G) RNA binding;poly-purine tract binding;RNA binding;single-stranded DNA binding;single-stranded RNA binding;structure-specific DNA binding	cell part;cytoplasm;extracellular membrane-bounded organelle;extracellular organelle;extracellular region part;extracellular vesicular exosome;intracellular membrane-bounded organelle;intracellular organelle;intracellular organelle part;intracellular part;macromolecular complex;membrane-bounded organelle;membrane-bounded vesicle;nuclear part;nucleoplasm;nucleus;organelle;organelle part;ribonucleo…			17	1	1	59.4	7.4	7.4	27.191	0	90.41	9043100000	5242300000	3800800000	0.210859
0.120732	-0.233106	-0.565525	-0.613554	-0.163403	0.0274787	-0.0741594	-0.176454	-0.453875	-0.436257	-0.272107	-0.163127	-0.570001	-0.61841	-0.164697	0.0301205	-0.0747462	-0.457467	-0.439709	-0.266275	-0.356437	-0.251337	-0.365659	-0.540937	-0.457429	-0.434294	0.0125869	-0.583878	-0.633465	0.0307167	-0.0765659	-0.280938	biological regulation;cell cycle;cell surface receptor linked signaling pathway;cellular localization;cellular macromolecule localization;cellular process;cellular protein localization;cellular response to stimulus;enzyme linked receptor protein signaling pathway;establishment of localization;establishment of localization in cell;establishment of organelle localization;establishment of protein lo…	binding;nucleic acid binding;nucleocytoplasmic transporter activity;protein transporter activity;RNA binding;substrate-specific transporter activity;transporter activity	annulate lamellae;Cajal body;cell part;chromosomal part;cytoplasm;cytoplasmic part;cytosol;envelope;intracellular membrane-bounded organelle;intracellular non-membrane-bounded organelle;intracellular organelle;intracellular organelle part;intracellular part;kinetochore;macromolecular complex;membrane;membrane part;membrane-bounded organelle;non-membrane-bounded organelle;nuclear body;nuclear enve…	Ribosome biogenesis in eukaryotes;RNA transport		47	47	47	52.7	52.7	52.7	123.38	0	323.31	82220000000	48934000000	33285000000	0.622214
-0.2489	-0.766396	-0.828204	-1.0603	-0.297114	-0.157019	-0.189611	-0.213348	-0.872788	-0.395054	-0.465454	-0.800264	-0.834758	-1.06869	-0.299465	-0.158262	-0.191112	-0.879695	-0.39818	-0.157441	-0.681313	-0.756053	-0.837162	-0.933523	-0.267434	-0.582366	-0.715017	-0.85508	-1.09471	-0.162115	-0.195764	-0.480559	biological regulation;negative regulation of binding;negative regulation of biological process;negative regulation of biosynthetic process;negative regulation of cellular biosynthetic process;negative regulation of cellular macromolecule biosynthetic process;negative regulation of cellular metabolic process;negative regulation of cellular process;negative regulation of chromatin binding;negative …	adenyl nucleotide binding;adenyl ribonucleotide binding;ATP binding;binding;catalytic activity;DNA binding;helicase activity;hydrolase activity;hydrolase activity, acting on acid anhydrides;hydrolase activity, acting on acid anhydrides, in phosphorus-containing anhydrides;nucleic acid binding;nucleic acid binding transcription factor activity;nucleoside-triphosphatase activity;nucleotide binding;…	cell part;intracellular membrane-bounded organelle;intracellular organelle;intracellular part;membrane-bounded organelle;nucleus;organelle			38	38	38	28.6	28.6	28.6	206.89	0	189.51	3375100000	1939500000	1435600000	0.962334
0.0303483	1.57834	1.35169	1.31457	NaN	NaN	0.579892	1.65909	NaN	-0.728719	1.06978	NaN	1.48164	1.44095	NaN	NaN	0.635643	NaN	-0.734486	1.67805	1.13733	0.976144	1.41084	1.49026	0.667281	1.12147	1.19041	1.51097	1.46948	NaN	0.648224	1.19584		binding;cation binding;ion binding;metal ion binding	cell part;intracellular membrane-bounded organelle;intracellular organelle;intracellular part;membrane-bounded organelle;nucleus;organelle			24	24	24	24.9	24.9	24.9	151.19	0	323.31	780020000	521930000	258090000	0.7208
-0.409915	-0.532175	-0.188112	-0.0703835	-0.130023	-0.0919541	-0.188557	-0.855449	-0.228043	-0.118861	-0.419258	-0.906682	-0.189601	-0.0709405	-0.131052	-0.0926818	-0.190049	-0.229847	-0.119802	-0.729915	-0.670337	-0.840534	-0.613568	-0.567306	-0.798649	-0.306194	-0.892182	-0.194216	-0.0726676	-0.0949382	-0.194676	-0.432864	anatomical structure development;cellular component organization;cellular component organization at cellular level;cellular component organization or biogenesis;cellular component organization or biogenesis at cellular level;cellular process;COPII vesicle coating;developmental process;endoplasmic reticulum organization;establishment of localization;establishment of protein localization;organelle …		cell part;cytoplasm;cytoplasmic part;cytosol;endoplasmic reticulum membrane;endoplasmic reticulum part;Golgi apparatus;Golgi apparatus part;Golgi membrane;intracellular membrane-bounded organelle;intracellular organelle;intracellular organelle part;intracellular part;membrane;membrane part;membrane-bounded organelle;organelle;organelle membrane;organelle part		+	42	42	42	34.9	34.9	34.9	233.51	0	323.31	7079600000	3994700000	3085000000	0.000629666
0.325032	-0.0358354	0.221603	0.582557	0.550587	0.330409	0.416246	0.164796	-1.19088	0.792978	0.499567	-0.591051	0.242908	0.638564	0.60352	0.362175	0.456264	-1.2003	0.869215	-0.252935	0.215391	-0.326203	-0.44735	-0.141928	0.288909	-0.241174	-0.59455	0.247716	0.651204	0.369344	0.465296	0.558435	anatomical structure development;anatomical structure formation involved in morphogenesis;biological regulation;brain development;cell proliferation;cell surface receptor linked signaling pathway;cellular process;cellular response to stimulus;developmental process;neural precursor cell proliferation;neural tube closure;neuroblast proliferation;organ development;positive regulation of axonogenesis…	molecular transducer activity;receptor activity;semaphorin receptor activity;signal transducer activity;signaling receptor activity;transmembrane signaling receptor activity	cell part;cell surface;extracellular membrane-bounded organelle;extracellular organelle;extracellular region part;extracellular vesicular exosome;integral to membrane;integral to plasma membrane;intracellular;intrinsic to membrane;intrinsic to plasma membrane;membrane part;membrane-bounded organelle;membrane-bounded vesicle;organelle;plasma membrane part;vesicle	Axon guidance		49	49	47	36.9	36.9	36.1	205.12	0	301.77	8030100000	5219200000	2810900000	0.161375
-0.216152	-0.0391937	0.518392	0.283977	-0.514194	-0.025675	-0.332299	0.222114	-0.0803385	-0.0486629	0.164279	-0.056065	0.56823	0.311279	-0.518264	-0.0258782	-0.334929	-0.0809743	-0.049048	0.0998987	-0.0180249	0.536237	0.417612	0.408069	0.411284	0.489764	-0.0607844	0.579478	0.31744	-0.0265082	-0.343082	0.183637	cellular macromolecule metabolic process;cellular metabolic process;cellular nitrogen compound metabolic process;cellular process;macromolecule metabolic process;metabolic process;nitrogen compound metabolic process;nucleic acid metabolic process;nucleobase-containing compound metabolic process;primary metabolic process;RNA metabolic process;RNA processing	binding;nucleotide binding	cell part;intracellular membrane-bounded organelle;intracellular organelle;intracellular organelle part;intracellular part;membrane-bounded organelle;nuclear part;nucleoplasm;nucleus;organelle;organelle part	Spliceosome		42	42	42	45	45	45	118.23	0	323.31	20450000000	12988000000	7462300000	0.107737
0.201275	0.43524	0.440594	0.40985	0.0383447	0.510778	-0.0189484	0.464253	0.104867	0.38966	0.639128	0.20012	0.482953	0.449253	0.0420311	0.559884	-0.0190984	0.114949	0.427122	0.831018	0.522729	1.51848	1.11661	0.755506	0.846935	0.901589	0.361463	0.492512	0.458146	0.570966	-0.0195633	0.714441	biological regulation;biosynthetic process;cellular biosynthetic process;cellular component organization;cellular component organization at cellular level;cellular component organization or biogenesis;cellular component organization or biogenesis at cellular level;cellular macromolecule biosynthetic process;cellular macromolecule metabolic process;cellular metabolic process;cellular nitrogen comp…	binding;catalytic activity;histone methyltransferase activity;histone methyltransferase activity (H3-K4 specific);histone-lysine N-methyltransferase activity;lysine N-methyltransferase activity;methyltransferase activity;N-methyltransferase activity;nucleic acid binding;nucleotide binding;protein methyltransferase activity;protein-lysine N-methyltransferase activity;RNA binding;S-adenosylmethioni…	cell part;chromatin remodeling complex;chromosome;histone methyltransferase complex;intracellular membrane-bounded organelle;intracellular non-membrane-bounded organelle;intracellular organelle;intracellular organelle part;intracellular part;macromolecular complex;membrane-bounded organelle;methyltransferase complex;non-membrane-bounded organelle;nuclear body;nuclear part;nuclear speck;nucleoplas…	Lysine degradation	+	22	22	22	25	25	25	186.03	0	151.54	2198400000	1391200000	807160000	0.000173738
0.349579	0.0920042	-1.17047	-1.43167	-0.285227	-1.29021	-0.432458	0.113103	-1.34195	-1.25537	-1.39157	-0.218185	-1.17973	-1.443	-0.287484	-1.30043	-0.43588	-1.35257	-1.26531	-0.0529174	-0.452031	-0.616072	-0.255963	-1.3559	-0.459889	-1.12372	0.0720592	-1.20845	-1.47813	-1.33208	-0.446492	-1.43673	amine metabolic process;biosynthetic process;carboxylic acid metabolic process;cellular amine metabolic process;cellular amino acid metabolic process;cellular aromatic compound metabolic process;cellular biosynthetic process;cellular ketone metabolic process;cellular metabolic process;cellular nitrogen compound biosynthetic process;cellular nitrogen compound metabolic process;cellular process;'de…	adenyl nucleotide binding;adenyl ribonucleotide binding;ATP binding;binding;carbon-nitrogen ligase activity, with glutamine as amido-N-donor;catalytic activity;cation binding;ion binding;ligase activity;ligase activity, forming carbon-nitrogen bonds;metal ion binding;nucleotide binding;phosphoribosylformylglycinamidine synthase activity;purine nucleotide binding;purine ribonucleoside triphosphate…	cell part;cytoplasm;cytoplasmic part;cytosol;extracellular membrane-bounded organelle;extracellular organelle;extracellular region part;extracellular vesicular exosome;intracellular part;membrane-bounded organelle;membrane-bounded vesicle;organelle;vesicle	Purine metabolism	+	37	37	37	43.9	43.9	43.9	144.73	0	323.31	15589000000	9589100000	6000300000	0.0356123
1.07337	1.50372	1.06321	0.978154	0.494355	1.24901	0.951153	0.87286	1.36688	0.676833	0.826655	1.39774	1.16543	1.07219	0.541882	1.36908	1.0426	1.49829	0.741904	0.508325	0.946689	1.036	1.54494	1.08622	0.498838	0.795392	1.80858	1.18849	1.09342	1.39618	1.06323	0.924066			cell part;intracellular organelle part;intracellular part;nuclear part;nucleoplasm;organelle part			16	14	14	24	21.3	21.3	112.96	0	93.748	1438600000	1091200000	347440000	0.98664
-1.38717	-0.520873	0.506537	-0.103588	-1.68125	-1.02953	-1.38016	-0.508139	-0.591997	-1.02347	-0.470155	NaN	0.555236	-0.104408	-1.69456	-1.03768	-1.39108	-0.596682	-1.03157	-0.557685	-1.22591	-0.243754	0.257384	-0.599613	-0.730713	-0.126463	-0.851291	0.566226	-0.10695	-1.06294	-1.42495	-0.485412	cellular macromolecule metabolic process;cellular metabolic process;cellular nitrogen compound metabolic process;cellular process;macromolecule metabolic process;metabolic process;ncRNA metabolic process;ncRNA processing;nitrogen compound metabolic process;nucleic acid metabolic process;nucleobase-containing compound metabolic process;primary metabolic process;RNA metabolic process;RNA processing…		cell part;cytoplasmic part;intracellular membrane-bounded organelle;intracellular organelle;intracellular part;membrane-bounded organelle;mitochondrion;organelle			12	12	12	28.4	28.4	28.4	65.485	0	60.762	1345600000	678820000	666810000	0.810483
0.182241	0.244028	NaN	NaN	0.676512	0.0986626	0.301143	0.0496539	0.34359	0.0515948	-0.144326	0.0100609	NaN	NaN	0.741552	0.108148	0.330095	0.376623	0.0565551	-0.131025	0.314963	-0.206208	-0.993426	-0.459698	-0.575696	NaN	-0.0313601	NaN	NaN	0.110289	0.336629	-0.149009	activation of immune response;activation of innate immune response;anatomical structure development;anatomical structure morphogenesis;antigen receptor-mediated signaling pathway;biological regulation;body fluid secretion;cell differentiation;cell proliferation;cell surface receptor linked signaling pathway;cellular developmental process;cellular macromolecule metabolic process;cellular metabolic…	adenyl nucleotide binding;adenyl ribonucleotide binding;ATP binding;binding;catalytic activity;identical protein binding;IkappaB kinase activity;kinase activity;nucleotide binding;phosphotransferase activity, alcohol group as acceptor;protein binding;protein dimerization activity;protein heterodimerization activity;protein homodimerization activity;protein kinase activity;protein serine/threonine…	CD40 receptor complex;cell part;cytoplasm;cytoplasmic part;cytosol;cytosolic part;IkappaB kinase complex;internal side of plasma membrane;intracellular membrane-bounded organelle;intracellular organelle;intracellular organelle part;intracellular part;macromolecular complex;membrane part;membrane-bounded organelle;nuclear part;nucleoplasm;organelle;organelle part;plasma membrane part;protein compl…	Acute myeloid leukemia;Adipocytokine signaling pathway;Apoptosis;B cell receptor signaling pathway;Chagas disease (American trypanosomiasis);Chemokine signaling pathway;Chronic myeloid leukemia;Cytosolic DNA-sensing pathway;Epithelial cell signaling in Helicobacter pylori infection;Hepatitis C;MAPK signaling pathway;Measles;NOD-like receptor signaling pathway;Osteoclast differentiation;Pancreatic…	+	12	11	11	18.1	17	17	84.639	0	34.474	668430000	409660000	258780000	0.00671998
-0.126729	-0.176582	-0.376423	-0.851126	-0.175784	-0.790342	0.132564	-0.323157	-0.23507	-0.655986	-1.06279	-0.138415	-0.379402	-0.857861	-0.177175	-0.796596	0.145309	-0.236931	-0.661177	-0.207934	-0.478645	-0.562246	-0.88333	-0.708061	-0.676168	-1.43783	-0.127445	-0.388639	-0.878746	-0.815989	0.148185	-1.09728	catabolic process;cellular catabolic process;cellular macromolecule catabolic process;cellular macromolecule metabolic process;cellular metabolic process;cellular nitrogen compound metabolic process;cellular process;deadenylation-dependent decapping of nuclear-transcribed mRNA;exonucleolytic nuclear-transcribed mRNA catabolic process involved in deadenylation-dependent decay;gene expression;histo…	binding;nucleic acid binding;RNA binding;RNA cap binding	cell part;cytoplasm;cytoplasmic mRNA processing body;cytoplasmic part;cytosol;intracellular membrane-bounded organelle;intracellular non-membrane-bounded organelle;intracellular organelle;intracellular part;macromolecular complex;membrane-bounded organelle;non-membrane-bounded organelle;nucleus;organelle;ribonucleoprotein complex;RNA granule	RNA degradation		5	5	5	63.9	63.9	63.9	15.179	0	55.82	1791900000	1034200000	757670000	0.190834
1.95686	2.85759	1.91278	NaN	2.96743	2.25871	2.02927	2.59118	1.94595	2.38274	2.74577	NaN	2.09667	NaN	3.25272	2.47586	2.22437	2.13303	2.61182	-2.07444	3.32446	NaN	3.79383	NaN	2.88161	0.985502	1.66362	2.13817	NaN	2.52487	2.2684	3.06933	activation of immune response;antigen receptor-mediated signaling pathway;biological regulation;cell surface receptor linked signaling pathway;cellular macromolecule metabolic process;cellular metabolic process;cellular process;cellular protein metabolic process;cellular response to stimulus;establishment of localization;establishment of localization in cell;establishment of protein localization;…	binding;protein binding;receptor binding	actin cytoskeleton;cell part;cytoplasmic part;cytoskeleton;cytosol;intracellular membrane-bounded organelle;intracellular non-membrane-bounded organelle;intracellular organelle;intracellular part;membrane-bounded organelle;non-membrane-bounded organelle;nucleus;organelle			23	23	23	35.7	35.7	35.7	90.605	0	108.65	2366800000	2052600000	314130000	0.730802
0.0788263	-1.23605	0.132206	0.0680884	-0.495391	-0.55432	-0.458298	-0.24947	0.202237	0.140743	-0.155717	-0.739766	0.144917	0.0746344	-0.499312	-0.558707	-0.461925	0.22168	0.154274	-0.0603395	-0.680026	-0.131486	-0.727002	0.168094	-0.279657	0.154136	-0.256134	0.147785	0.0761117	-0.572309	-0.47317	-0.160771	adult behavior;adult locomotory behavior;adult walking behavior;alcohol metabolic process;autophagy;behavior;bile acid metabolic process;biological regulation;carbohydrate metabolic process;carboxylic acid metabolic process;catabolic process;cellular carbohydrate metabolic process;cellular catabolic process;cellular component organization;cellular component organization or biogenesis;cellular ket…	binding;cholesterol binding;hedgehog receptor activity;lipid binding;lipid transporter activity;molecular transducer activity;receptor activity;signal transducer activity;signaling receptor activity;steroid binding;sterol binding;sterol transporter activity;substrate-specific transporter activity;transmembrane signaling receptor activity;transporter activity	cell part;cytoplasmic part;endoplasmic reticulum;endosomal part;endosome membrane;envelope;extracellular membrane-bounded organelle;extracellular organelle;extracellular region;extracellular region part;extracellular vesicular exosome;Golgi apparatus;integral to membrane;integral to plasma membrane;intracellular membrane-bounded organelle;intracellular organelle;intracellular organelle part;intra…	Lysosome		6	6	6	5.9	5.9	5.9	142.17	0	25.481	788340000	442170000	346170000	0.857751
-1.40785	-1.01721	-0.0449473	-0.342772	-1.09562	0.0133368	-0.53146	-0.986161	-0.113275	-0.178906	-0.309824	0.161379	-0.045303	-0.345484	-1.10429	0.014619	-0.535666	-0.114171	-0.180322	-0.650343	-0.577446	-0.976186	-0.588374	-0.438036	-0.391971	-0.35078	-1.46221	-0.0464059	-0.353895	0.0149083	-0.548707	-0.319878	acylglycerol biosynthetic process;acylglycerol metabolic process;anatomical structure development;biological regulation;biosynthetic process;carboxylic acid biosynthetic process;carboxylic acid metabolic process;CDP-diacylglycerol biosynthetic process;CDP-diacylglycerol metabolic process;cellular biosynthetic process;cellular ketone metabolic process;cellular lipid metabolic process;cellular meta…	1-acylglycerol-3-phosphate O-acyltransferase activity;acylglycerol O-acyltransferase activity;catalytic activity;O-acyltransferase activity;transferase activity;transferase activity, transferring acyl groups;transferase activity, transferring acyl groups other than amino-acyl groups	cell part;cytoplasmic part;endoplasmic reticulum;endoplasmic reticulum membrane;endoplasmic reticulum part;integral to membrane;intracellular membrane-bounded organelle;intracellular organelle;intracellular organelle part;intracellular part;intrinsic to membrane;membrane;membrane part;membrane-bounded organelle;organelle;organelle membrane;organelle part	Fat digestion and absorption;Glycerolipid metabolism;Glycerophospholipid metabolism		5	5	5	18	18	18	30.914	0	25.392	1284900000	722080000	562870000	0.324668
NaN	-1.5519	NaN	-0.31218	NaN	-0.149908	-1.01496	-1.1865	0.766477	-0.378853	-0.571681	-0.613764	NaN	-0.314651	NaN	-0.151094	-1.02299	0.840167	-0.381852	-1.53137	-0.68292	-1.62071	-1.10302	-0.261204	-1.16538	NaN	-2.22008	NaN	-0.322311	-0.154772	-1.04789	-0.590233	biosynthetic process;carboxylic acid biosynthetic process;carboxylic acid metabolic process;cellular biosynthetic process;cellular ketone metabolic process;cellular lipid metabolic process;cellular metabolic process;cellular process;fatty acid biosynthetic process;fatty acid metabolic process;lipid biosynthetic process;lipid metabolic process;membrane lipid biosynthetic process;membrane lipid met…	catalytic activity;electron carrier activity;oxidoreductase activity;oxidoreductase activity, acting on paired donors, with incorporation or reduction of molecular oxygen;sphingolipid delta-4 desaturase activity	cell part;cytoplasmic part;endoplasmic reticulum;endoplasmic reticulum membrane;endoplasmic reticulum part;integral to membrane;integral to plasma membrane;intracellular membrane-bounded organelle;intracellular organelle;intracellular organelle part;intracellular part;intrinsic to membrane;intrinsic to plasma membrane;membrane;membrane part;membrane-bounded organelle;mitochondrion;organelle;organ…	Sphingolipid metabolism		4	4	4	20.7	20.7	20.7	37.866	0	24.764	1108700000	549570000	559100000	0.147037
-0.244478	-0.210958	0.163898	0.709339	-0.660321	0.120139	-0.273249	-0.358776	0.146177	0.376626	0.197373	-0.479448	0.179656	0.777535	-0.665547	0.131689	-0.275412	0.160231	0.412835	-0.673329	-0.246791	-0.387188	0.0618597	-0.330927	-0.487836	0.422565	0.0600826	0.183212	0.792926	0.134295	-0.282117	0.220631	cellular component organization;cellular component organization or biogenesis;cellular membrane organization;cellular process;endocytosis;establishment of localization;establishment of localization in cell;establishment of protein localization;exocytosis;Golgi vesicle transport;intracellular transport;membrane invagination;membrane organization;post-Golgi vesicle-mediated transport;protein transp…		cell part;clathrin coated vesicle membrane;clathrin-coated vesicle;coated vesicle;coated vesicle membrane;cytoplasmic membrane-bounded vesicle;cytoplasmic part;cytoplasmic vesicle;cytoplasmic vesicle membrane;cytoplasmic vesicle part;endosomal part;endosome membrane;Golgi apparatus part;integral to membrane;intracellular membrane-bounded organelle;intracellular organelle;intracellular organelle p…			7	7	7	36.7	36.7	36.7	37.92	0	135.47	4942300000	2976700000	1965600000	0.174404
0.338551	0.591742	0.342687	0.881101	0.386954	0.19964	0.375369	0.390881	1.08358	0.95879	0.533352	0.0738082	0.375632	0.96581	0.424156	0.218833	0.411457	1.18775	1.05097	0.0230832	0.578151	-0.501863	0.734244	0.53229	-0.146497	0.323553	-0.199081	0.383068	0.984927	0.223164	0.419601	0.596201	cellular process;establishment of localization;establishment of localization in cell;establishment of protein localization;Golgi vesicle transport;intracellular transport;post-Golgi vesicle-mediated transport;protein transport;transport;vesicle-mediated transport		cell part;cytoplasmic membrane-bounded vesicle;cytoplasmic part;cytoplasmic vesicle;endosomal part;endosome membrane;extracellular membrane-bounded organelle;extracellular organelle;extracellular region part;extracellular vesicular exosome;Golgi apparatus;Golgi apparatus part;Golgi membrane;integral to membrane;intracellular membrane-bounded organelle;intracellular organelle;intracellular organel…			5	5	5	16.1	16.1	16.1	36.648	0	250.29	8568700000	6025400000	2543300000	0.116464
0.842638	0.88045	-0.67275	-0.459128	1.19898	0.314598	0.846162	0.384486	0.974506	0.383098	-0.029006	1.05751	-0.678074	-0.462761	1.31425	0.344843	0.927512	1.0682	0.419929	0.344172	0.615486	-0.281373	-0.15083	0.190554	-0.264949	-1.12747	0.173714	-0.694582	-0.474027	0.351669	0.945872	-0.0299473	actin cytoskeleton organization;actin filament organization;actin filament-based process;actin nucleation;Arp2/3 complex-mediated actin nucleation;biological regulation;cellular component movement;cellular component organization;cellular component organization at cellular level;cellular component organization or biogenesis;cellular component organization or biogenesis at cellular level;cellular p…	structural constituent of cytoskeleton;structural molecule activity	actin cytoskeleton;adherens junction;anchoring junction;Arp2/3 protein complex;cell junction;cell part;cell-substrate adherens junction;cell-substrate junction;cytoplasm;cytoskeletal part;cytoskeleton;extracellular membrane-bounded organelle;extracellular organelle;extracellular region part;extracellular vesicular exosome;focal adhesion;intracellular non-membrane-bounded organelle;intracellular o…	Bacterial invasion of epithelial cells;Fc gamma R-mediated phagocytosis;Pathogenic Escherichia coli infection;Regulation of actin cytoskeleton;Shigellosis		22	22	21	64	64	57.8	40.949	0	323.31	67962000000	48002000000	19960000000	0.0550772
0.730377	0.66603	-0.72497	-0.541821	1.10145	0.0893982	0.7202	0.415207	0.93805	0.227038	-0.0804898	1.06456	-0.730707	-0.546109	1.20734	0.097993	0.789441	1.02823	0.248866	0.232158	0.761016	-0.29836	-0.261003	0.352217	-0.259232	-1.11571	0.156129	-0.748496	-0.559404	0.0999326	0.805067	-0.0831019	actin cytoskeleton organization;actin filament organization;actin filament-based process;actin nucleation;Arp2/3 complex-mediated actin nucleation;axon guidance;biological regulation;cell surface receptor linked signaling pathway;cellular component movement;cellular component organization;cellular component organization at cellular level;cellular component organization or biogenesis;cellular comp…	structural constituent of cytoskeleton;structural molecule activity	actin cytoskeleton;adherens junction;anchoring junction;Arp2/3 protein complex;cell junction;cell leading edge;cell part;cell projection;cell-substrate adherens junction;cell-substrate junction;cytoplasm;cytoplasmic part;cytoskeletal part;cytoskeleton;cytosol;endosome;extracellular membrane-bounded organelle;extracellular organelle;extracellular region part;extracellular vesicular exosome;focal a…	Bacterial invasion of epithelial cells;Fc gamma R-mediated phagocytosis;Pathogenic Escherichia coli infection;Regulation of actin cytoskeleton;Shigellosis		24	24	24	81.7	81.7	81.7	34.333	0	323.31	77298000000	51511000000	25787000000	0.0763508
0.688563	0.795138	-0.849096	-0.631405	1.08235	0.151114	0.712558	0.452578	0.930595	0.250386	-0.106387	1.07494	-0.855816	-0.636402	1.18641	0.165642	0.781064	1.02006	0.274458	0.329131	0.867077	-0.26601	-0.330791	0.284547	-0.268164	-1.11359	0.093298	-0.876651	-0.651896	0.168921	0.796524	-0.109839	actin cytoskeleton organization;actin filament organization;actin filament-based process;actin nucleation;Arp2/3 complex-mediated actin nucleation;axon guidance;biological regulation;cell surface receptor linked signaling pathway;cellular component movement;cellular component organization;cellular component organization at cellular level;cellular component organization or biogenesis;cellular comp…	structural constituent of cytoskeleton;structural molecule activity	actin cytoskeleton;adherens junction;anchoring junction;Arp2/3 protein complex;cell junction;cell part;cell projection;cell-substrate adherens junction;cell-substrate junction;cytoplasmic part;cytoskeletal part;cytoskeleton;cytosol;extracellular membrane-bounded organelle;extracellular organelle;extracellular region part;extracellular vesicular exosome;focal adhesion;intracellular non-membrane-bo…	Bacterial invasion of epithelial cells;Fc gamma R-mediated phagocytosis;Pathogenic Escherichia coli infection;Regulation of actin cytoskeleton;Shigellosis		10	10	10	50	50	50	20.546	0	76.422	32390000000	22750000000	9639500000	0.0861052
-0.231488	NaN	NaN	0.647969	0.543043	0.901289	0.647606	-0.985839	0.988659	0.542515	0.0642551	NaN	NaN	0.710265	0.595252	0.987939	0.709866	1.08371	0.594673	-1.24166	-0.0383023	-1.75563	NaN	-0.047489	-0.459112	NaN	NaN	NaN	0.724324	1.00749	0.723917	0.0718267	anatomical structure development;biological regulation;biosynthetic process;cell differentiation;cellular biosynthetic process;cellular developmental process;cellular macromolecule biosynthetic process;cellular macromolecule metabolic process;cellular metabolic process;cellular nitrogen compound metabolic process;cellular process;developmental process;ectoderm development;macromolecule biosynthet…	binding;cation binding;DNA binding;ion binding;metal ion binding;nucleic acid binding;regulatory region DNA binding;regulatory region nucleic acid binding;RNA polymerase II regulatory region DNA binding;RNA polymerase II regulatory region sequence-specific DNA binding;sequence-specific DNA binding;transcription regulatory region DNA binding;transcription regulatory region sequence-specific DNA bi…	cell part;intracellular membrane-bounded organelle;intracellular organelle;intracellular organelle part;intracellular part;membrane-bounded organelle;nuclear part;nucleoplasm;nucleus;organelle;organelle part		+	4	4	4	10.6	10.6	10.6	58.026	0	54.273	447230000	295920000	151310000	0.00494508
-1.18558	-0.698631	0.12602	-0.225402	-1.41809	-0.877522	-1.16727	-0.857535	-0.914913	-0.847081	-0.324799	-0.874507	0.138135	-0.227186	-1.42932	-0.884467	-1.17651	-0.922153	-0.853784	-0.540648	-0.951121	-0.42629	-0.269105	-0.322004	-0.684044	0.248346	0.122959	0.140869	-0.232717	-0.905999	-1.20515	-0.335339	biological regulation;biosynthetic process;cellular biosynthetic process;cellular macromolecule biosynthetic process;cellular macromolecule metabolic process;cellular metabolic process;cellular nitrogen compound metabolic process;cellular process;defense response;gene expression;immune response;immune system process;innate immune response;macromolecule biosynthetic process;macromolecule metabolic…	binding;catalytic activity;DNA binding;DNA-directed RNA polymerase activity;nucleic acid binding;nucleotidyltransferase activity;RNA polymerase activity;transferase activity;transferase activity, transferring phosphorus-containing groups	cell part;cytoplasmic part;cytosol;DNA-directed RNA polymerase complex;DNA-directed RNA polymerase I complex;DNA-directed RNA polymerase III complex;intracellular organelle part;intracellular part;macromolecular complex;nuclear DNA-directed RNA polymerase complex;nuclear part;nucleolar part;nucleoplasm;nucleoplasm part;organelle part;protein complex;RNA polymerase complex	Cytosolic DNA-sensing pathway;Purine metabolism;Pyrimidine metabolism;RNA polymerase		14	14	14	57.8	57.8	57.8	39.249	0	203.01	8495700000	4950400000	3545300000	0.134446
0.18929	-0.22949	0.525011	0.806658	0.641911	0.437422	0.709566	-0.130002	2.27305	1.30015	0.343327	2.15092	0.575486	0.88421	0.703625	0.479476	0.777783	2.49158	1.42515	-0.124122	0.332587	-0.0695514	-0.248174	0.735926	-0.253495	0.0934594	-0.360018	0.586877	0.901712	0.488967	0.793179	0.383784	acute inflammatory response;acute-phase response;apoptosis;biological regulation;biosynthetic process;cell activation;cell death;cellular biosynthetic process;cellular component organization;cellular component organization or biogenesis;cellular lipid metabolic process;cellular membrane organization;cellular metabolic process;cellular process;death;defense response;defense response to virus;glyce…	binding;calcium ion binding;cation binding;CD4 receptor binding;DNA binding;enzyme binding;epidermal growth factor receptor binding;growth factor receptor binding;ion binding;lipid transporter activity;metal ion binding;nucleic acid binding;nucleic acid binding transcription factor activity;phospholipid scramblase activity;phospholipid transporter activity;protein binding;protein domain specific …	cell part;cytoplasmic part;cytosol;extracellular matrix;extracellular membrane-bounded organelle;extracellular organelle;extracellular region part;extracellular vesicular exosome;Golgi apparatus;integral to membrane;integral to plasma membrane;intracellular membrane-bounded organelle;intracellular non-membrane-bounded organelle;intracellular organelle;intracellular organelle part;intracellular pa…			4	4	4	21.1	21.1	21.1	26.825	0	38.607	1149200000	808280000	340910000	0.0850012
-0.0976722	0.246709	0.218908	0.1051	-1.18717	-0.610526	-0.946763	0.0881086	-0.588332	-0.481718	-0.057891	0.077693	0.239954	0.115205	-1.19656	-0.615358	-0.954255	-0.592988	-0.48553	0.764709	0.0554111	1.13775	0.423816	0.409307	0.825708	0.849037	-0.0502583	0.244703	0.117485	-0.630339	-0.977487	-0.0597697	biological regulation;biosynthetic process;calcium ion homeostasis;catabolic process;cation homeostasis;cellular biosynthetic process;cellular macromolecule biosynthetic process;cellular macromolecule metabolic process;cellular metabolic process;cellular nitrogen compound metabolic process;cellular process;cellular protein metabolic process;cellular response to chemical stimulus;cellular response…	acid-amino acid ligase activity;binding;catalytic activity;cation binding;chromatin binding;DNA binding;estrogen response element binding;histone acetyl-lysine binding;histone binding;ion binding;kinase activity;ligase activity;ligase activity, forming carbon-nitrogen bonds;metal ion binding;nucleic acid binding;p53 binding;phosphotransferase activity, alcohol group as acceptor;protein binding;pr…	cell part;chromatin;chromosomal part;cytoplasmic part;cytosol;euchromatin;intracellular membrane-bounded organelle;intracellular organelle;intracellular organelle part;intracellular part;membrane-bounded organelle;nuclear chromatin;nuclear chromosome part;nuclear euchromatin;nuclear part;nucleoplasm;nucleus;organelle;organelle part;perichromatin fibrils		+	28	27	27	40.2	39.3	39.3	113.02	0	200.26	2306500000	1661100000	645340000	0.00189306
-0.0660884	0.564391	0.648228	0.746053	-0.238273	0.0953351	0.0134765	0.294107	0.685072	0.538126	-0.157357	0.319436	0.710549	0.817778	-0.240159	0.104501	0.0147722	0.750935	0.589861	0.390076	0.414345	0.569082	0.49571	0.734168	0.343454	0.965032	0.316817	0.724613	0.833965	0.106569	0.0150646	-0.162463	biological regulation;cellular process;cellular response to chemical stimulus;cellular response to endogenous stimulus;cellular response to hormone stimulus;cellular response to organic substance;cellular response to steroid hormone stimulus;cellular response to stimulus;hormone-mediated signaling pathway;regulation of biological process;regulation of cellular process;response to chemical stimulu…	binding;cation binding;heme binding;ion binding;iron ion binding;ligand-dependent nuclear receptor activity;lipid binding;metal ion binding;molecular transducer activity;receptor activity;signal transducer activity;signaling receptor activity;steroid binding;steroid hormone receptor activity;tetrapyrrole binding;transition metal ion binding	cell part;endomembrane system;integral to membrane;intrinsic to membrane;membrane;membrane part			9	8	8	49.8	45.7	45.7	23.818	0	247.83	6214200000	4242400000	1971800000	0.551211
-0.478268	-0.476025	-0.906713	-1.11396	-0.555376	-1.04376	-0.662012	-0.76853	-0.913014	-1.15922	-1.07558	-0.591451	-0.913889	-1.12277	-0.559772	-1.05202	-0.667251	-0.92024	-1.1684	-0.973956	-0.752772	-0.94729	-0.653914	-1.20791	-1.02733	-1.00051	-0.682117	-0.936137	-1.15011	-1.07763	-0.683495	-1.11049	cellular component assembly;cellular component assembly at cellular level;cellular component organization;cellular component organization at cellular level;cellular component organization or biogenesis;cellular component organization or biogenesis at cellular level;cellular macromolecular complex assembly;cellular macromolecular complex subunit organization;cellular macromolecule metabolic proces…	binding;chaperone binding;protein binding;unfolded protein binding	cell part;cytoplasm;cytoplasmic part;cytosolic part;intracellular part;macromolecular complex;prefoldin complex;protein complex		+	13	13	13	72.9	72.9	72.9	14.582	0	45.188	4726000000	2257100000	2468800000	0.0259354
-0.910392	-0.409081	0.318277	-0.137638	-1.72458	-0.86814	-1.46995	-0.525633	-0.587762	-0.53112	-0.590329	-0.647138	0.348876	-0.138727	-1.73823	-0.87501	-1.48159	-0.592413	-0.535323	-0.362806	-0.48389	-0.015176	-0.0852588	0.623592	0.0435032	0.124196	-0.476007	0.355782	-0.142105	-0.896312	-1.51766	-0.609486	cellular macromolecule metabolic process;cellular metabolic process;cellular nitrogen compound metabolic process;cellular process;macromolecule metabolic process;maturation of SSU-rRNA;maturation of SSU-rRNA from tricistronic rRNA transcript (SSU-rRNA, 5.8S rRNA, LSU-rRNA);metabolic process;ncRNA metabolic process;ncRNA processing;nitrogen compound metabolic process;nucleic acid metabolic process…		90S preribosome;cell part;intracellular non-membrane-bounded organelle;intracellular organelle;intracellular organelle part;intracellular part;macromolecular complex;non-membrane-bounded organelle;nuclear part;nucleolus;organelle;organelle part;preribosome;ribonucleoprotein complex;small-subunit processome			18	18	18	40.3	40.3	40.3	68.07	0	121.72	3386500000	1869500000	1516900000	0.138063
-1.45661	-1.22382	0.106538	-0.584617	-1.58673	-0.921853	-1.30604	-1.01135	-0.928019	-1.20192	-0.775803	-1.52033	0.116781	-0.589244	-1.59929	-0.929149	-1.31638	-0.935363	-1.21143	-1.05278	-1.32259	-0.526746	-0.743549	-0.553323	-0.828943	-0.146621	-0.683151	0.119092	-0.603589	-0.951769	-1.34843	-0.800979	biological regulation;biosynthetic process;cellular biosynthetic process;cellular macromolecule biosynthetic process;cellular macromolecule metabolic process;cellular metabolic process;cellular nitrogen compound metabolic process;cellular process;macromolecule biosynthetic process;macromolecule metabolic process;metabolic process;negative regulation of biological process;negative regulation of bi…	binding;DNA binding;nucleic acid binding	cell part;cytoplasmic part;endoplasmic reticulum;intracellular membrane-bounded organelle;intracellular non-membrane-bounded organelle;intracellular organelle;intracellular organelle part;intracellular part;membrane-bounded organelle;non-membrane-bounded organelle;nuclear part;nucleolus;nucleus;organelle;organelle part			20	20	20	36.1	36.1	36.1	77.672	0	96.286	2934700000	1743500000	1191200000	0.288339
-1.1364	-0.404195	0.311063	-0.19522	-1.30736	0.0746411	-0.579181	-1.11826	-0.304591	0.0499991	-0.0811964	-1.26095	0.340969	-0.196765	-1.3177	0.0818171	-0.583765	-0.307002	0.054806	-1.21519	-0.872273	-0.582272	-0.421994	-0.522699	-0.64599	-0.0734814	-0.463539	0.347718	-0.201556	0.0834365	-0.597977	-0.0838314	anatomical structure formation involved in morphogenesis;anatomical structure morphogenesis;biosynthetic process;carboxylic acid biosynthetic process;carboxylic acid metabolic process;cell junction assembly;cell junction organization;cell-cell junction assembly;cell-cell junction organization;cellular biosynthetic process;cellular component assembly;cellular component assembly at cellular level;c…	acetyltransferase activity;acyl-CoA thioesterase activity;binding;catalytic activity;CoA hydrolase activity;glycerone-phosphate O-acyltransferase activity;hydrolase activity;hydrolase activity, acting on ester bonds;O-acetyltransferase activity;O-acyltransferase activity;palmitoyl-CoA hydrolase activity;protein binding;receptor binding;thiolester hydrolase activity;transferase activity;transferas…	cell part;cytoplasmic part;intracellular membrane-bounded organelle;intracellular organelle;intracellular organelle lumen;intracellular organelle part;intracellular part;membrane;membrane-bounded organelle;membrane-enclosed lumen;microbody;microbody lumen;microbody membrane;microbody part;mitochondrion;organelle;organelle lumen;organelle membrane;organelle part;peroxisomal matrix;peroxisomal memb…	Glycerophospholipid metabolism;Peroxisome		27	27	27	45.6	45.6	45.6	77.187	0	162.29	4407800000	2387700000	2020100000	0.0944623
3.0411	2.6151	0.591614	NaN	1.77081	2.80091	2.40736	2.22951	NaN	2.02581	-0.355224	NaN	0.648492	NaN	1.94106	3.07019	2.6388	NaN	2.22057	0.617864	2.26697	-1.2174	NaN	NaN	2.22179	NaN	NaN	0.661328	NaN	3.13096	2.69103	-0.366752		binding;cation binding;ion binding;metal ion binding;transition metal ion binding;zinc ion binding	actin cytoskeleton;adherens junction;anchoring junction;cell junction;cell part;cell-substrate adherens junction;cell-substrate junction;cytoplasm;cytoskeleton;focal adhesion;intracellular non-membrane-bounded organelle;intracellular organelle;intracellular part;membrane;non-membrane-bounded organelle;organelle;plasma membrane			25	25	2	44.8	44.8	2.5	73.612	0	323.31	1769200000	1514200000	255020000	0.543342
-0.901996	-0.341969	-0.378381	-0.109655	-0.816508	-0.291374	-1.26106	-0.379525	0.11968	-0.580948	-0.489123	-0.490197	-0.381376	-0.110523	-0.82297	-0.29368	-1.27104	0.131186	-0.585546	-1.25554	-0.450165	-0.766834	-0.0286181	0.0948395	-0.396151	-0.399688	-0.472211	-0.39066	-0.113214	-0.300829	-1.30199	-0.504995	carboxylic acid catabolic process;carboxylic acid metabolic process;catabolic process;cellular catabolic process;cellular ketone metabolic process;cellular lipid catabolic process;cellular lipid metabolic process;cellular metabolic process;cellular process;fatty acid beta-oxidation;fatty acid beta-oxidation using acyl-CoA oxidase;fatty acid catabolic process;fatty acid metabolic process;fatty aci…	acyl-CoA dehydrogenase activity;acyl-CoA oxidase activity;binding;catalytic activity;coenzyme binding;cofactor binding;flavin adenine dinucleotide binding;oxidoreductase activity;oxidoreductase activity, acting on the CH-CH group of donors;oxidoreductase activity, acting on the CH-CH group of donors, oxygen as acceptor;pristanoyl-CoA oxidase activity;protein binding;receptor binding	cell part;cytoplasmic part;intracellular membrane-bounded organelle;intracellular organelle;intracellular organelle lumen;intracellular organelle part;intracellular part;membrane;membrane-bounded organelle;membrane-enclosed lumen;microbody;microbody lumen;microbody part;mitochondrion;organelle;organelle lumen;organelle part;peroxisomal matrix;peroxisomal part;peroxisome	alpha-Linolenic acid metabolism;Biosynthesis of unsaturated fatty acids;Fatty acid metabolism;Peroxisome;PPAR signaling pathway		16	16	16	31.6	31.6	31.6	77.628	0	109.31	6254500000	4730300000	1524200000	0.99619
-0.258217	0.232085	0.254513	0.442345	0.0719458	0.583454	-0.0249639	-0.296754	0.519423	0.720293	0.198943	-0.0172621	0.278981	0.484872	0.0788626	0.639547	-0.0251615	0.569361	0.789542	-0.139087	0.18031	-0.165869	-0.191701	-0.128294	-0.224342	0.189004	-0.434692	0.284504	0.494469	0.652206	-0.025774	0.222386	biological regulation;cellular component organization;cellular component organization or biogenesis;cellular localization;cellular macromolecule localization;cellular membrane organization;cellular process;cellular protein localization;establishment of localization;establishment of localization in cell;Golgi vesicle transport;intracellular transport;localization;macromolecule localization;membran…		cell part;cell surface;cytoplasmic part;endoplasmic reticulum-Golgi intermediate compartment;Golgi apparatus;Golgi apparatus part;integral to Golgi membrane;integral to membrane;integral to organelle membrane;intracellular membrane-bounded organelle;intracellular organelle;intracellular organelle part;intracellular part;intrinsic to Golgi membrane;intrinsic to membrane;intrinsic to organelle memb…		+	7	7	7	41.3	41.3	41.3	22.958	0	68.324	7462700000	4845500000	2617300000	0.0113453
-0.890268	-0.498459	-0.23389	0.141814	-0.173681	0.643385	-0.0964974	-0.742358	0.21685	0.512027	-0.0511161	-0.514938	-0.235741	0.155448	-0.175056	0.70524	-0.0972611	0.237698	0.561253	-0.653103	-0.702294	-0.563131	-0.473355	-0.0358755	-0.758367	0.131597	-0.913739	-0.24148	0.158524	0.7192	-0.0996289	-0.0527749	biological regulation;cellular component organization;cellular component organization at cellular level;cellular component organization or biogenesis;cellular component organization or biogenesis at cellular level;cellular process;Golgi organization;organelle organization;positive regulation of biological process;positive regulation of cellular component organization;positive regulation of cellul…		cell part;cytoplasmic part;endoplasmic reticulum membrane;endoplasmic reticulum part;endoplasmic reticulum-Golgi intermediate compartment;endoplasmic reticulum-Golgi intermediate compartment membrane;Golgi apparatus part;Golgi membrane;integral to membrane;intracellular membrane-bounded organelle;intracellular organelle;intracellular organelle part;intracellular part;intrinsic to membrane;membran…		+	6	6	6	46.5	46.5	46.5	17.97	0	128.66	28372000000	17150000000	11222000000	0.0171164
-0.025451	-0.527636	0.472294	0.529851	0.0172064	1.0305	0.160943	0.129543	0.258621	0.942703	0.521489	-0.795317	0.517701	0.580791	0.0188606	1.12958	0.176416	0.283484	1.03333	0.0764365	-0.116679	0.338122	0.0782624	0.0459341	0.447604	0.135173	-0.393803	0.527948	0.592287	1.15193	0.179908	0.58294	alcohol biosynthetic process;alcohol metabolic process;amine metabolic process;biosynthetic process;cellular biosynthetic process;cellular lipid metabolic process;cellular metabolic process;cellular nitrogen compound biosynthetic process;cellular nitrogen compound metabolic process;cellular process;ceramide biosynthetic process;ceramide metabolic process;lipid biosynthetic process;lipid metabolic…	binding;C-acyltransferase activity;catalytic activity;cofactor binding;C-palmitoyltransferase activity;palmitoyltransferase activity;pyridoxal phosphate binding;serine C-palmitoyltransferase activity;transferase activity;transferase activity, transferring acyl groups;transferase activity, transferring acyl groups other than amino-acyl groups;vitamin B6 binding;vitamin binding	cell part;cytoplasmic part;endoplasmic reticulum membrane;endoplasmic reticulum palmitoyltransferase complex;endoplasmic reticulum part;integral to membrane;intracellular organelle part;intracellular part;intrinsic to membrane;macromolecular complex;membrane;membrane part;organelle membrane;organelle part;palmitoyltransferase complex;protein complex;serine C-palmitoyltransferase complex;SPOTS com…	Sphingolipid metabolism	+	21	21	21	60.9	60.9	60.9	52.743	0	215.68	10316000000	6737800000	3578300000	0.0213173
0.699527	0.6387	1.3167	1.35906	0.64211	2.09712	0.94521	1.03301	0.794633	1.73574	1.45161	0.0590944	1.44329	1.48972	0.703843	2.29874	1.03608	0.871029	1.90262	0.918417	0.591722	1.1204	0.922812	0.797336	1.37663	0.578318	0.339417	1.47185	1.51921	2.34424	1.05659	1.62267	alcohol biosynthetic process;alcohol metabolic process;amine metabolic process;biosynthetic process;cellular biosynthetic process;cellular lipid metabolic process;cellular metabolic process;cellular nitrogen compound biosynthetic process;cellular nitrogen compound metabolic process;cellular process;ceramide biosynthetic process;ceramide metabolic process;lipid biosynthetic process;lipid metabolic…	binding;C-acyltransferase activity;catalytic activity;cofactor binding;C-palmitoyltransferase activity;palmitoyltransferase activity;pyridoxal phosphate binding;serine C-palmitoyltransferase activity;transferase activity;transferase activity, transferring acyl groups;transferase activity, transferring acyl groups other than amino-acyl groups;vitamin B6 binding;vitamin binding	cell part;cytoplasmic part;endoplasmic reticulum membrane;endoplasmic reticulum palmitoyltransferase complex;endoplasmic reticulum part;integral to membrane;intracellular membrane-bounded organelle;intracellular organelle;intracellular organelle part;intracellular part;intrinsic to membrane;macromolecular complex;membrane;membrane part;membrane-bounded organelle;mitochondrion;organelle;organelle …	Sphingolipid metabolism	+	26	26	26	54.4	54.4	54.4	62.924	0	323.31	8886600000	6809400000	2077100000	0.00698056
0.104742	-0.0892609	-0.119497	0.0895518	-0.202567	0.049969	-0.215071	0.105655	0.169652	0.0156378	-0.0392061	0.288884	-0.120442	0.0981614	-0.20417	0.054773	-0.216773	0.185963	0.0171412	0.3419	0.158088	0.468868	-0.010204	0.320998	0.356077	0.301277	-0.316871	-0.123375	0.100104	0.0558572	-0.222051	-0.0404784	apoptosis;biological regulation;carbohydrate metabolic process;cell communication;cell death;cellular carbohydrate metabolic process;cellular component organization;cellular component organization at cellular level;cellular component organization or biogenesis;cellular component organization or biogenesis at cellular level;cellular macromolecule metabolic process;cellular metabolic process;cellul…	acetylglucosaminyltransferase activity;binding;catalytic activity;enzyme activator activity;enzyme regulator activity;lipid binding;phosphatidylinositol binding;phosphatidylinositol-3,4,5-trisphosphate binding;phospholipid binding;protein N-acetylglucosaminyltransferase activity;transferase activity;transferase activity, transferring glycosyl groups;transferase activity, transferring hexosyl grou…	cell part;cytoplasm;cytoplasmic part;cytoskeletal part;cytosol;histone acetyltransferase complex;histone methyltransferase complex;intracellular membrane-bounded organelle;intracellular organelle;intracellular organelle part;intracellular part;macromolecular complex;membrane;membrane-bounded organelle;methyltransferase complex;microtubule organizing center;mitochondrion;MLL5-L complex;nuclear par…	Other types of O-glycan biosynthesis		39	39	2	50.7	50.7	2.8	116.92	0	312.42	9707100000	5938800000	3768300000	0.0855606
0.520111	-0.204456	-1.22338	-1.47869	0.390566	-1.47975	0.166351	0.421959	NaN	-1.3216	-1.08123	-0.0908017	-1.23306	-1.49039	0.428115	-1.49146	0.182345	NaN	-1.33205	0.117649	-0.612248	-1.0107	-0.476888	-1.31297	-0.14697	-1.11507	-0.000615013	-1.26308	-1.52667	-1.52777	0.185954	-1.11632	alcohol biosynthetic process;alcohol metabolic process;biosynthetic process;carbohydrate biosynthetic process;carbohydrate metabolic process;cellular biosynthetic process;cellular carbohydrate biosynthetic process;cellular carbohydrate metabolic process;cellular macromolecule metabolic process;cellular metabolic process;cellular nitrogen compound metabolic process;cellular process;cellular protei…	catalytic activity;intramolecular transferase activity;intramolecular transferase activity, phosphotransferases;isomerase activity;phosphomannomutase activity	cell body;cell part;cytoplasmic part;cytosol;extracellular membrane-bounded organelle;extracellular organelle;extracellular region part;extracellular vesicular exosome;intracellular part;membrane-bounded organelle;membrane-bounded vesicle;neuronal cell body;organelle;vesicle	Amino sugar and nucleotide sugar metabolism;Fructose and mannose metabolism		11	11	11	54.9	54.9	54.9	28.082	0	134.73	1856800000	1122400000	734370000	0.0876014
0.208454	-0.371104	-0.732172	-1.52614	-0.445242	-0.0910562	-0.346834	0.190269	-0.871754	-0.519168	-0.617596	-0.293217	-0.737966	-1.53822	-0.448766	-0.0917768	-0.349578	-0.878653	-0.523277	-0.156705	-0.849635	-0.0540825	-0.347972	-0.418097	-0.248624	-0.14777	-0.3425	-0.755932	-1.57567	-0.0940111	-0.358089	-0.637638	biological regulation;cellular component organization;cellular component organization at cellular level;cellular component organization or biogenesis;cellular component organization or biogenesis at cellular level;cellular macromolecule metabolic process;cellular metabolic process;cellular nitrogen compound metabolic process;cellular process;chromatin modification;chromatin organization;chromatin…	binding;chromatin binding;DNA bending activity;DNA binding;double-stranded DNA binding;nucleic acid binding;structure-specific DNA binding	cell part;chromosome;intracellular membrane-bounded organelle;intracellular non-membrane-bounded organelle;intracellular organelle;intracellular part;membrane-bounded organelle;non-membrane-bounded organelle;nucleus;organelle			14	13	13	57	55.5	55.5	22.98	0	47.859	6752200000	4344400000	2407900000	0.299066
-0.438035	-1.02869	-0.975075	-1.2322	-0.660421	-0.230852	-0.594611	-0.562026	-1.44405	-0.882451	-0.690856	-0.937455	-0.982792	-1.24196	-0.665647	-0.232679	-0.599317	-1.45548	-0.889435	-0.513215	-1.09709	-0.573029	-0.926807	-1.39419	-0.421796	-0.828982	-0.850773	-1.00672	-1.27219	-0.238344	-0.613907	-0.713276	biological regulation;cell cycle arrest;cell cycle process;cellular macromolecule metabolic process;cellular metabolic process;cellular process;cellular protein metabolic process;dephosphorylation;macromolecule metabolic process;macromolecule modification;metabolic process;negative regulation of biological process;negative regulation of cell cycle;negative regulation of cellular process;peptidyl-…	binding;catalytic activity;cation binding;hydrolase activity;hydrolase activity, acting on ester bonds;ion binding;metal ion binding;phosphatase activity;phosphoprotein phosphatase activity;phosphoric ester hydrolase activity;protein serine/threonine phosphatase activity	cell part;cytoplasm;intracellular membrane-bounded organelle;intracellular organelle;intracellular organelle part;intracellular part;membrane-bounded organelle;nuclear part;nucleoplasm;nucleus;organelle;organelle part			25	25	25	59.9	59.9	59.9	59.271	0	323.31	18152000000	9519100000	8632500000	0.98907
-0.134671	0.1913	-1.41299	-0.379561	0.386215	-0.517507	0.163033	-0.369874	-0.540961	-0.442032	-0.226995	-1.20453	-1.42417	-0.382565	0.423346	-0.521602	0.178707	-0.545242	-0.44553	-0.830431	-0.286835	-0.708167	-0.978489	-1.06722	-1.03094	-1.23718	-0.0836855	-1.45884	-0.391878	-0.534301	0.182245	-0.234361	actin cytoskeleton organization;actin filament organization;actin filament-based process;alcohol metabolic process;biological adhesion;biological regulation;biosynthetic process;carbohydrate metabolic process;cell adhesion;cellular biosynthetic process;cellular carbohydrate metabolic process;cellular component organization;cellular component organization at cellular level;cellular component organ…	binding;catalytic activity;hydrolase activity;protein binding;protein domain specific binding;SH2 domain binding	cell part;cell projection;cytoplasm;cytoplasmic part;cytoskeleton;cytosol;filopodium;Golgi apparatus;intracellular membrane-bounded organelle;intracellular non-membrane-bounded organelle;intracellular organelle;intracellular part;lamellipodium;membrane;membrane-bounded organelle;non-membrane-bounded organelle;organelle;plasma membrane	Inositol phosphate metabolism;Phosphatidylinositol signaling system		26	23	23	27.7	25.3	25.3	138.6	0	108.13	2833300000	1347100000	1486200000	0.386065
-0.363928	-0.241623	-0.00948362	-0.0069192	-0.128489	-0.502989	-0.549014	-0.477233	-0.141434	-0.105237	-0.289976	-0.354051	-0.00955868	-0.00697396	-0.129506	-0.50697	-0.553359	-0.142553	-0.106069	-0.763411	-0.627086	-0.4511	-0.471474	-0.351349	-0.798127	-0.449176	-0.762976	-0.00979138	-0.00714374	-0.519312	-0.56683	-0.299386	biological regulation;biosynthetic process;cellular biosynthetic process;cellular component assembly;cellular component assembly at cellular level;cellular component organization;cellular component organization at cellular level;cellular component organization or biogenesis;cellular component organization or biogenesis at cellular level;cellular macromolecular complex assembly;cellular macromolec…	binding;nucleic acid binding;RNA binding;translation factor activity, nucleic acid binding;translation initiation factor activity	cell part;cytoplasmic part;cytosol;eukaryotic 43S preinitiation complex;eukaryotic 48S preinitiation complex;eukaryotic translation initiation factor 3 complex;eukaryotic translation initiation factor 3 complex, eIF3m;intracellular part;macromolecular complex;membrane;protein complex;ribonucleoprotein complex;translation preinitiation complex	RNA transport	+	25	25	25	63.4	63.4	63.4	62.039	0	323.31	39942000000	22052000000	17890000000	0.00475186
-0.195277	-0.365803	-0.0496656	0.0973027	-0.133072	-0.559558	-0.471062	-0.318574	0.241089	0.0403436	-0.348811	-0.206792	-0.0500586	0.106657	-0.134125	-0.563986	-0.47479	0.264267	0.0442222	-0.698442	-0.235832	-0.497016	-0.428976	-0.217892	-0.675152	-0.296376	-0.785891	-0.0512773	0.108769	-0.577716	-0.486349	-0.36013	biological regulation;biosynthetic process;cellular biosynthetic process;cellular component assembly;cellular component assembly at cellular level;cellular component organization;cellular component organization at cellular level;cellular component organization or biogenesis;cellular component organization or biogenesis at cellular level;cellular macromolecular complex assembly;cellular macromolec…	binding;nucleic acid binding;RNA binding;translation factor activity, nucleic acid binding;translation initiation factor activity	cell part;cytoplasmic part;cytosol;eukaryotic 43S preinitiation complex;eukaryotic 48S preinitiation complex;eukaryotic translation initiation factor 3 complex;eukaryotic translation initiation factor 3 complex, eIF3m;extracellular membrane-bounded organelle;extracellular organelle;extracellular region part;extracellular vesicular exosome;intracellular part;macromolecular complex;membrane;membran…	Measles;RNA transport		25	25	25	75.3	75.3	75.3	39.93	0	323.31	17326000000	9946400000	7379500000	0.0540001
0.328806	-0.163266	0.215692	NaN	-0.149203	-0.16545	-0.205455	0.421669	0.0561574	0.0196648	0.304063	0.251382	0.236429	NaN	-0.150384	-0.16676	-0.207081	0.0615563	0.0215554	0.501573	0.065502	0.685691	0.619911	0.464215	0.524727	0.509278	0.197695	0.241109	NaN	-0.170819	-0.212122	0.339892	biological regulation;biosynthetic process;cell surface receptor linked signaling pathway;cellular biosynthetic process;cellular component assembly;cellular component assembly at cellular level;cellular component organization;cellular component organization at cellular level;cellular component organization or biogenesis;cellular component organization or biogenesis at cellular level;cellular lipi…	binding;catalytic activity;chromatin binding;chromatin DNA binding;cyclin binding;deacetylase activity;DNA binding;enzyme binding;histone deacetylase activity;histone deacetylase activity (H3-K14 specific);histone deacetylase activity (H3-K9 specific);histone deacetylase binding;hydrolase activity;hydrolase activity, acting on carbon-nitrogen (but not peptide) bonds;hydrolase activity, acting on …	cell part;chromatin remodeling complex;cytoplasm;cytoplasmic part;cytoskeletal part;Golgi apparatus;histone deacetylase complex;intracellular membrane-bounded organelle;intracellular organelle;intracellular organelle part;intracellular part;macromolecular complex;membrane;membrane-bounded organelle;microtubule;nuclear part;nucleoplasm;nucleoplasm part;nucleus;organelle;organelle part;plasma membr…		+	9	8	8	27.3	25.5	25.5	48.847	0	49.464	1447400000	923310000	524110000	0.00331306
-0.869195	-0.966569	-0.112066	-0.373898	-0.970119	-0.753914	-1.23734	-1.12035	-0.70644	-0.851943	-0.438702	-0.294932	-0.112953	-0.376857	-0.977797	-0.75988	-1.24714	-0.71203	-0.858686	-0.663671	-0.974558	-0.0616393	-0.446223	-0.639218	-0.510419	-0.0797031	-0.99785	-0.115703	-0.386032	-0.778379	-1.2775	-0.452938		adenyl nucleotide binding;adenyl ribonucleotide binding;ATP binding;binding;nucleotide binding;purine nucleotide binding;purine ribonucleoside triphosphate binding;purine ribonucleotide binding;ribonucleotide binding	cell part;cytoplasm;cytoplasmic part;intracellular membrane-bounded organelle;intracellular non-membrane-bounded organelle;intracellular organelle;intracellular organelle part;intracellular part;membrane;membrane-bounded organelle;mitochondrion;non-membrane-bounded organelle;nuclear part;nucleolus;nucleus;organelle;organelle part;plasma membrane	Ribosome biogenesis in eukaryotes		14	14	14	23.9	23.9	23.9	85.037	0	48.373	1646300000	899920000	746430000	0.754829
0.178501	0.414421	1.19201	0.859117	0.444628	-0.00449939	0.338546	0.521902	0.295729	0.688239	0.840291	0.309076	1.30661	0.941713	0.487375	-0.00453499	0.371094	0.32416	0.754406	0.475647	0.49118	0.698621	0.627334	1.41114	0.872922	0.640223	0.637646	1.33247	0.960353	-0.0046454	0.378439	0.939308	amine biosynthetic process;amine catabolic process;amine metabolic process;biological regulation;biosynthetic process;branched chain family amino acid biosynthetic process;branched chain family amino acid catabolic process;branched chain family amino acid metabolic process;carboxylic acid biosynthetic process;carboxylic acid catabolic process;carboxylic acid metabolic process;catabolic process;ce…	branched-chain-amino-acid transaminase activity;catalytic activity;L-isoleucine transaminase activity;L-leucine transaminase activity;L-valine transaminase activity;transaminase activity;transferase activity;transferase activity, transferring nitrogenous groups	cell part;cytoplasmic part;intracellular membrane-bounded organelle;intracellular organelle;intracellular organelle lumen;intracellular organelle part;intracellular part;membrane-bounded organelle;membrane-enclosed lumen;mitochondrial matrix;mitochondrial part;mitochondrion;organelle;organelle lumen;organelle part	Pantothenate and CoA biosynthesis;Valine, leucine and isoleucine biosynthesis;Valine, leucine and isoleucine degradation		13	13	13	37	37	37	44.287	0	189.1	3622800000	2538800000	1084000000	0.274785
-0.564159	-0.783745	-0.856899	-1.33706	-0.609019	-0.786537	-0.478938	-1.15481	-0.975207	-0.761088	-0.920506	-0.611302	-0.86368	-1.34764	-0.613839	-0.792762	-0.482728	-0.982924	-0.767112	-0.832787	-0.709576	-1.32538	-1.20233	-1.99477	-1.08219	-0.514039	-0.94393	-0.884706	-1.38045	-0.812061	-0.49448	-0.950378	biological regulation;cellular process;cellular response to stimulus;establishment of localization;establishment of localization in cell;establishment of protein localization;gene expression;intracellular protein transport;intracellular transport;macromolecule metabolic process;metabolic process;protein transport;regulation of biological process;regulation of cellular process;response to stimulus…	binding;enzyme binding;GTPase binding;protein binding;Ran GTPase binding;Ras GTPase binding;small GTPase binding	cell part;cytoplasmic part;cytosol;intracellular organelle part;intracellular part;nuclear part;nucleoplasm;organelle part			17	16	16	22.9	21.9	21.9	119.94	0	94.354	1825500000	1008000000	817490000	0.287311
1.64559	1.55124	0.907518	1.81958	1.50331	1.62005	1.52665	1.46963	1.62162	2.25307	1.36691	1.30343	0.994767	1.99452	1.64783	1.7758	1.67342	1.77753	2.46968	1.24948	1.35724	0.278602	0.857745	0.83724	1.12874	1.06305	0.570798	1.01446	2.034	1.81095	1.70654	1.52799	biological regulation;cellular component assembly;cellular component assembly at cellular level;cellular component organization;cellular component organization at cellular level;cellular component organization or biogenesis;cellular component organization or biogenesis at cellular level;cellular localization;cellular membrane fusion;cellular membrane organization;cellular process;establishment of…	binding;channel inhibitor activity;channel regulator activity;chloride channel inhibitor activity;chloride channel regulator activity;ion channel inhibitor activity;protein binding;SNAP receptor activity;SNARE binding;syntaxin binding	azurophil granule;cell part;cytoplasmic membrane-bounded vesicle;cytoplasmic part;cytoplasmic vesicle;early endosome;early endosome membrane;endocytic vesicle;endomembrane system;endosomal part;endosome;endosome membrane;extracellular membrane-bounded organelle;extracellular organelle;extracellular region part;extracellular vesicular exosome;immunological synapse;integral to membrane;intracellula…	Phagosome;SNARE interactions in vesicular transport	+	12	12	12	53.6	53.6	53.6	27.4	0	272.47	10380000000	8201900000	2178500000	0.000376416
-2.94571	-2.4781	-1.57227	-0.437524	-1.1267	-1.18721	-1.36825	-3.23903	0.183766	-0.425665	-1.20448	-1.22107	-1.58472	-0.440987	-1.13561	-1.19661	-1.37908	0.201434	-0.429034	-3.62882	-1.49959	-2.51651	-2.79863	-1.555	-3.65151	-1.53427	-2.93275	-1.6233	-0.451723	-1.22574	-1.41265	-1.24357	anion transport;biological regulation;blood coagulation;carboxylic acid metabolic process;carboxylic acid transport;cell migration;cell motility;cellular component movement;cellular ketone metabolic process;cellular metabolic process;cellular process;coagulation;establishment of localization;hemostasis;immune system process;ion transmembrane transport;ion transport;lactate transmembrane transport…	active transmembrane transporter activity;carboxylic acid transmembrane transporter activity;lactate transmembrane transporter activity;monocarboxylic acid transmembrane transporter activity;organic acid transmembrane transporter activity;secondary active monocarboxylate transmembrane transporter activity;secondary active transmembrane transporter activity;substrate-specific transmembrane transpo…	actin cytoskeleton;cell part;cytoskeleton;integral to membrane;integral to plasma membrane;intracellular non-membrane-bounded organelle;intracellular organelle;intracellular organelle part;intracellular part;intrinsic to membrane;intrinsic to plasma membrane;membrane;membrane part;non-membrane-bounded organelle;nuclear membrane;nuclear part;organelle;organelle membrane;organelle part;plasma membr…		+	9	9	9	18.5	18.5	18.5	49.469	0	23.722	4196900000	1692000000	2504900000	0.0173432
0.254552	2.20858	0.685304	1.28908	-0.975251	NaN	-0.714548	0.0319766	-0.163024	-0.352165	-0.388592	NaN	0.751189	1.41302	-0.982969	NaN	-0.720203	-0.164315	-0.354952	0.019365	-0.630857	-1.08974	0.381333	-0.577948	-0.0930116	-0.236453	0.850238	0.766058	1.44099	NaN	-0.737736	-0.401202	biological regulation;blood coagulation;cell activation;cellular process;coagulation;establishment of localization;establishment of localization in cell;exocytosis;hemostasis;metabolic process;multicellular organismal process;oxidation-reduction process;platelet activation;platelet degranulation;positive regulation of biological process;positive regulation of cell proliferation;positive regulatio…	15-hydroxyprostaglandin dehydrogenase (NAD+) activity;active transmembrane transporter activity;adenyl nucleotide binding;adenyl ribonucleotide binding;ATP binding;ATPase activity;ATPase activity, coupled;ATPase activity, coupled to movement of substances;ATPase activity, coupled to transmembrane movement of substances;binding;catalytic activity;hydrolase activity;hydrolase activity, acting on ac…	basolateral plasma membrane;cell part;cytoplasmic part;cytoplasmic vesicle membrane;cytoplasmic vesicle part;integral to membrane;intracellular organelle part;intracellular part;intrinsic to membrane;membrane;membrane part;organelle membrane;organelle part;plasma membrane;plasma membrane part;platelet dense granule membrane;secretory granule membrane;vesicle membrane	ABC transporters;Bile secretion		18	18	18	17.6	17.6	17.6	144.2	0	59.341	955870000	615800000	340070000	0.878711
-1.26172	-0.406122	0.189596	0.00216349	-1.67121	-0.78423	-1.50612	-0.764135	-0.939538	-0.723703	-0.196929	-0.834517	0.207823	0.00237148	-1.68443	-0.790436	-1.51804	-0.946973	-0.729431	-0.696382	-0.815196	-0.5032	0.135415	0.135577	-0.388998	0.257512	0.131098	0.211937	0.00241842	-0.809679	-1.555	-0.20332	biological regulation;biosynthetic process;cell surface receptor linked signaling pathway;cellular biosynthetic process;cellular macromolecule biosynthetic process;cellular macromolecule metabolic process;cellular metabolic process;cellular nitrogen compound metabolic process;cellular process;cellular response to stimulus;enzyme linked receptor protein signaling pathway;gene expression;macromolec…	catalytic activity;DNA-directed RNA polymerase activity;nucleotidyltransferase activity;RNA polymerase activity;transferase activity;transferase activity, transferring phosphorus-containing groups	cell part;chromosome;cytoplasm;cytoplasmic part;DNA-directed RNA polymerase complex;DNA-directed RNA polymerase I complex;intracellular membrane-bounded organelle;intracellular non-membrane-bounded organelle;intracellular organelle;intracellular organelle part;intracellular part;macromolecular complex;membrane-bounded organelle;mitochondrion;non-membrane-bounded organelle;nuclear DNA-directed RNA…			17	17	17	60	60	60	54.985	0	205.72	3970700000	2157500000	1813200000	0.16974
0.086262	-0.102182	NaN	NaN	0.203024	-1.43346	0.249869	-0.434407	-0.862851	-1.15736	-1.01708	-0.628746	NaN	NaN	0.222542	-1.4448	0.273892	-0.86968	-1.16652	-0.331395	-0.0657146	-0.539017	-0.729208	-1.40782	-0.781647	NaN	0.057682	NaN	NaN	-1.47997	0.279313	-1.05009	cellular component organization;cellular component organization at cellular level;cellular component organization or biogenesis;cellular component organization or biogenesis at cellular level;cellular membrane fusion;cellular membrane organization;cellular process;endosome transport;ER to Golgi vesicle-mediated transport;establishment of localization;establishment of localization in cell;establis…	binding;catalytic activity;palmitoyltransferase activity;protein binding;protein-cysteine S-acyltransferase activity;protein-cysteine S-palmitoleyltransferase activity;S-acyltransferase activity;SNAP receptor activity;SNARE binding;transferase activity;transferase activity, transferring acyl groups;transferase activity, transferring acyl groups other than amino-acyl groups	cell part;cytoplasm;cytoplasmic part;cytoplasmic vesicle membrane;cytoplasmic vesicle part;cytosol;endoplasmic reticulum;endosome;extracellular membrane-bounded organelle;extracellular organelle;extracellular region part;extracellular vesicular exosome;Golgi apparatus;Golgi apparatus part;Golgi membrane;integral to membrane;integral to plasma membrane;intracellular membrane-bounded organelle;intr…	SNARE interactions in vesicular transport		10	10	10	62.1	62.1	62.1	22.417	0	80.373	1868600000	1073600000	794940000	0.817236
0.859735	0.945856	-0.591378	-0.506164	1.09493	0.222118	1.06054	0.859145	1.01853	0.260519	-0.0331308	1.16469	-0.596058	-0.51017	1.20019	0.243473	1.1625	1.11645	0.285565	0.209228	1.0384	0.00274778	-0.161269	0.47937	0.0536803	-1.04768	0.69824	-0.610569	-0.52259	0.248292	1.18551	-0.034206	actin cytoskeleton organization;actin filament organization;actin filament-based process;actin nucleation;Arp2/3 complex-mediated actin nucleation;axon guidance;biological regulation;cell migration;cell motility;cell surface receptor linked signaling pathway;cellular component movement;cellular component organization;cellular component organization at cellular level;cellular component organizatio…	structural constituent of cytoskeleton;structural molecule activity	actin cytoskeleton;adherens junction;anchoring junction;Arp2/3 protein complex;cell junction;cell part;cell projection;cell-substrate adherens junction;cell-substrate junction;cytoplasm;cytoplasmic part;cytoskeletal part;cytoskeleton;cytosol;extracellular membrane-bounded organelle;extracellular organelle;extracellular region part;extracellular vesicular exosome;focal adhesion;intracellular non-m…	Bacterial invasion of epithelial cells;Fc gamma R-mediated phagocytosis;Pathogenic Escherichia coli infection;Regulation of actin cytoskeleton;Shigellosis		13	13	12	76.8	76.8	76.8	16.32	0	298.01	38159000000	26913000000	11246000000	0.13244
0.365018	-0.330699	0.726825	0.536751	0.0529397	0.580072	-0.0583513	0.426241	0.860573	0.112632	0.734134	0.364347	0.796702	0.588355	0.0580294	0.635841	-0.0588131	0.943308	0.123461	0.498002	0.267353	0.478828	0.29526	0.699262	0.977917	1.01914	0.00103273	0.812472	0.600001	0.648426	-0.0602449	0.820642	biological regulation;biosynthetic process;catabolic process;cellular biosynthetic process;cellular catabolic process;cellular component assembly;cellular component assembly at cellular level;cellular component organization;cellular component organization at cellular level;cellular component organization or biogenesis;cellular component organization or biogenesis at cellular level;cellular macrom…	binding;catalytic activity;DNA-directed RNA polymerase activity;nucleotide binding;nucleotidyltransferase activity;protein binding;RNA polymerase activity;transferase activity;transferase activity, transferring phosphorus-containing groups;translation initiation factor binding	cell part;cytoplasmic mRNA processing body;cytoplasmic part;DNA-directed RNA polymerase complex;DNA-directed RNA polymerase II, core complex;intracellular membrane-bounded organelle;intracellular non-membrane-bounded organelle;intracellular organelle;intracellular organelle part;intracellular part;macromolecular complex;membrane-bounded organelle;non-membrane-bounded organelle;nuclear DNA-directe…	Huntington's disease;Purine metabolism;Pyrimidine metabolism;RNA polymerase		6	6	6	57	57	57	16.311	0	122.33	1991600000	1320000000	671590000	0.619898
-4.65502	-0.434317	-2.34611	0.145423	0.1592	-0.583653	-0.32322	NaN	-2.22861	-3.09653	-3.90739	-0.796186	-2.36468	0.159404	0.174506	-0.588271	-0.325778	-2.24624	-3.12104	-4.02562	-0.328565	-0.0867652	-2.48241	-0.182347	-0.62923	-1.9404	-0.160261	-2.42225	0.16256	-0.602593	-0.333709	-4.03419	biological regulation;cellular macromolecule metabolic process;cellular metabolic process;cellular nitrogen compound metabolic process;cellular process;chromosome segregation;macromolecule metabolic process;metabolic process;nitrogen compound metabolic process;nucleic acid metabolic process;nucleobase-containing compound metabolic process;primary metabolic process;regulation of biological process…	adenyl nucleotide binding;adenyl ribonucleotide binding;ATP binding;ATPase activity;ATPase activity, coupled;ATP-dependent helicase activity;ATP-dependent RNA helicase activity;binding;catalytic activity;DNA binding;helicase activity;hydrolase activity;hydrolase activity, acting on acid anhydrides;hydrolase activity, acting on acid anhydrides, in phosphorus-containing anhydrides;nucleic acid bind…	cell part;intracellular non-membrane-bounded organelle;intracellular organelle;intracellular organelle part;intracellular part;membrane;non-membrane-bounded organelle;nuclear part;nucleolus;organelle;organelle part	RIG-I-like receptor signaling pathway		36	6	6	60.6	12.7	12.7	73.153	0	53.526	1166100000	601570000	564580000	0.974375
0.350465	-0.237534	0.646497	0.580183	0.133664	1.03106	0.389119	0.535222	0.894621	1.00987	0.498678	0.411918	0.708651	0.635962	0.146515	1.13018	0.426529	0.98063	1.10696	0.545719	0.473914	-0.0632653	0.762609	0.977538	0.622107	0.870411	-0.0707544	0.722678	0.64855	1.15256	0.434972	0.55744	adult behavior;behavior;biological regulation;biosynthetic process;blood coagulation;cation homeostasis;cellular biosynthetic process;cellular cation homeostasis;cellular chemical homeostasis;cellular homeostasis;cellular ion homeostasis;cellular macromolecule biosynthetic process;cellular macromolecule metabolic process;cellular metabolic process;cellular monovalent inorganic cation homeostasis;…	binding;DNA binding;nucleic acid binding;nucleic acid binding transcription factor activity;sequence-specific DNA binding;sequence-specific DNA binding transcription factor activity	cell part;intracellular organelle part;intracellular part;nuclear part;nucleoplasm;organelle part			4	4	3	26.5	26.5	22.2	17.849	0	11.487	975410000	674340000	301070000	0.304599
0.641226	-0.467337	-1.06287	NaN	0.723354	-0.351998	0.718774	0.312027	-0.148272	-0.153201	-0.392058	0.65491	-1.07128	NaN	0.792897	-0.354784	0.787877	-0.149445	-0.154413	-0.0764418	0.158799	-1.40696	-0.689904	NaN	-0.228091	NaN	-0.77735	-1.09736	NaN	-0.363421	0.803472	-0.404781	actin cytoskeleton organization;actin filament-based process;activation of immune response;activation of innate immune response;activation of protein kinase activity;activation of protein kinase B activity;anatomical structure development;antigen receptor-mediated signaling pathway;biological regulation;biosynthetic process;blood coagulation;calcium-mediated signaling;cell activation;cell communi…	3-phosphoinositide-dependent protein kinase activity;adenyl nucleotide binding;adenyl ribonucleotide binding;ATP binding;binding;catalytic activity;enzyme activator activity;enzyme binding;enzyme regulator activity;kinase activity;lipase activator activity;nucleotide binding;phospholipase activator activity;phospholipase binding;phosphotransferase activity, alcohol group as acceptor;protein bindi…	adherens junction;anchoring junction;cell junction;cell part;cell projection;cell-substrate adherens junction;cell-substrate junction;cytoplasm;cytoplasmic membrane-bounded vesicle;cytoplasmic part;cytoplasmic vesicle;cytosol;focal adhesion;intracellular membrane-bounded organelle;intracellular organelle;intracellular organelle part;intracellular part;membrane;membrane-bounded organelle;membrane-…	Aldosterone-regulated sodium reabsorption;Endometrial cancer;Focal adhesion;Insulin signaling pathway;mTOR signaling pathway;Non-small cell lung cancer;PPAR signaling pathway;Prostate cancer		9	9	9	25.5	25.5	25.5	63.151	0	53.695	1067100000	661140000	405910000	0.260096
0.899639	0.912916	1.31862	1.44468	0.951065	1.87336	0.914259	0.470505	0.654429	1.29161	1.68978	0.529715	1.44539	1.58358	1.0425	2.05347	1.00216	0.717346	1.41579	1.21226	1.46992	0.618751	0.269861	1.05656	0.898627	0.938068	1.02963	1.474	1.61492	2.09411	1.02199	1.8889	amide transport;antigen processing and presentation;antigen processing and presentation of endogenous antigen;antigen processing and presentation of endogenous peptide antigen;antigen processing and presentation of endogenous peptide antigen via MHC class I;antigen processing and presentation of exogenous antigen;antigen processing and presentation of exogenous peptide antigen;antigen processing …	active transmembrane transporter activity;antigen binding;ATPase activity;ATPase activity, coupled;ATPase activity, coupled to movement of substances;ATPase activity, coupled to transmembrane movement of substances;binding;catalytic activity;hydrolase activity;hydrolase activity, acting on acid anhydrides;hydrolase activity, acting on acid anhydrides, catalyzing transmembrane movement of substanc…	cell part;cytoplasmic part;endoplasmic reticulum;endoplasmic reticulum membrane;endoplasmic reticulum part;Golgi apparatus part;Golgi membrane;integral to endoplasmic reticulum membrane;integral to lumenal side of endoplasmic reticulum membrane;integral to membrane;integral to organelle membrane;intracellular membrane-bounded organelle;intracellular organelle;intracellular organelle part;intracel…	Antigen processing and presentation	+	8	8	8	29	29	29	47.625	0	126.32	9431800000	7342900000	2088900000	0.0048263
1.79532	NaN	-3.17879	-6.25412	2.12838	0.245038	1.14629	1.45995	1.2972	0.697066	1.00813	-4.69511	-3.20394	-6.30361	2.333	0.268596	1.25649	1.42192	0.764082	-0.105662	0.98497	NaN	NaN	-0.154572	0.744894	NaN	-2.29271	-3.28194	-6.45707	0.273912	1.28136	1.12693	biological regulation;cellular process;cellular response to stimulus;defense response;immune response;immune system process;inflammatory response;innate immune response;intracellular receptor mediated signaling pathway;negative regulation of biological process;negative regulation of chemokine production;negative regulation of cytokine production;negative regulation of defense response;negative re…	actin binding;binding;cation binding;cytoskeletal protein binding;ion binding;metal ion binding;protein binding;transition metal ion binding;zinc ion binding	cell part;cell projection;cytoplasmic part;cytoskeletal part;cytosol;intracellular membrane-bounded organelle;intracellular organelle;intracellular organelle part;intracellular part;lamellipodium;macromolecular complex;membrane-bounded organelle;microtubule;microtubule associated complex;nucleus;organelle;organelle part;protein complex;ruffle	NOD-like receptor signaling pathway		25	25	25	44.8	44.8	44.8	86.443	0	155.77	117000000000	1045100000	116000000000	0.892145
-0.513512	-0.561991	-0.173479	-0.151471	-0.552904	-0.117305	-0.60079	-0.344024	-0.289526	-0.286862	-0.20632	-0.281532	-0.174852	-0.15267	-0.55728	-0.118233	-0.605545	-0.291817	-0.289132	-0.235011	-0.34383	0.00536743	-0.286308	-0.0853472	-0.0859982	0.163386	-0.491748	-0.179109	-0.156386	-0.121112	-0.620287	-0.213016	cellular macromolecule metabolic process;cellular metabolic process;cellular nitrogen compound metabolic process;cellular process;macromolecule metabolic process;metabolic process;mRNA metabolic process;mRNA processing;nitrogen compound metabolic process;nuclear mRNA splicing, via spliceosome;nucleic acid metabolic process;nucleobase-containing compound metabolic process;primary metabolic process…	adenyl nucleotide binding;adenyl ribonucleotide binding;ATP binding;ATPase activity;ATPase activity, coupled;ATP-dependent helicase activity;ATP-dependent RNA helicase activity;binding;catalytic activity;double-stranded RNA binding;helicase activity;hydrolase activity;hydrolase activity, acting on acid anhydrides;hydrolase activity, acting on acid anhydrides, in phosphorus-containing anhydrides;n…	cell part;cytoplasm;intracellular membrane-bounded organelle;intracellular non-membrane-bounded organelle;intracellular organelle;intracellular organelle part;intracellular part;macromolecular complex;membrane-bounded organelle;non-membrane-bounded organelle;nuclear part;nucleolus;nucleoplasm;nucleus;organelle;organelle part;ribonucleoprotein complex;spliceosomal complex;U12-type spliceosomal com…	Spliceosome		45	45	44	61.9	61.9	60.8	90.932	0	323.31	78392000000	46222000000	32169000000	0.202876
0.0400476	-0.10069	-0.0909719	0.00854761	-0.250822	-0.205463	-0.542758	0.230671	-0.52367	-0.341422	0.290499	-0.209129	-0.0916919	0.00936938	-0.252807	-0.207089	-0.547053	-0.527814	-0.344124	0.417053	0.0974913	0.869102	0.170313	0.316641	0.342495	0.34543	0.418509	-0.0939241	0.00955484	-0.212131	-0.560371	0.324731	biosynthetic process;cellular biosynthetic process;cellular macromolecule biosynthetic process;cellular macromolecule metabolic process;cellular metabolic process;cellular nitrogen compound metabolic process;cellular process;gene expression;macromolecule biosynthetic process;macromolecule metabolic process;metabolic process;mRNA capping;mRNA metabolic process;mRNA processing;nitrogen compound met…	binding;catalytic activity;methyltransferase activity;mRNA (guanine-N7-)-methyltransferase activity;mRNA methyltransferase activity;N-methyltransferase activity;nucleic acid binding;RNA binding;RNA methyltransferase activity;S-adenosylmethionine-dependent methyltransferase activity;transferase activity;transferase activity, transferring one-carbon groups	cell part;intracellular membrane-bounded organelle;intracellular non-membrane-bounded organelle;intracellular organelle;intracellular organelle part;intracellular part;macromolecular complex;membrane-bounded organelle;mRNA cap binding complex;non-membrane-bounded organelle;nuclear part;nucleolus;nucleoplasm;nucleus;organelle;organelle part;protein complex;receptor complex;RNA cap binding complex	mRNA surveillance pathway	+	15	15	15	44.5	44.5	44.5	54.843	0	117.33	4404600000	2725100000	1679600000	0.000175275
1.1054	1.31587	-0.332284	0.470066	1.03695	0.381426	0.998728	1.29311	0.926311	0.538726	0.324292	0.816022	-0.334913	0.515258	1.13664	0.418096	1.09475	1.01537	0.590519	0.416337	0.743352	-0.454196	-0.164192	0.254376	0.116398	-0.122139	0.877832	-0.343067	0.525457	0.426372	1.11642	0.362506		binding;calcium ion binding;cation binding;ion binding;metal ion binding;transition metal ion binding;zinc ion binding			+	41	41	41	21.9	21.9	21.9	331.07	0	190.38	2303600000	1542600000	760990000	0.0224175
-1.57386	-1.61801	-0.977639	-0.676217	-1.66079	-1.31714	-1.22697	-1.46684	-1.32804	-1.46692	-1.23687	-1.41155	-0.985376	-0.681568	-1.67394	-1.32757	-1.23668	-1.33855	-1.47853	-1.69892	-2.0549	-1.10948	-1.88051	-1.69608	-1.4774	NaN	-1.28754	-1.00936	-0.698161	-1.35988	-1.26679	-1.27701	biological regulation;regulation of biological process;regulation of cellular process;regulation of response to stimulus;regulation of signal transduction;regulation of signaling;regulation of TOR signaling cascade		cell part;cytoplasm;intracellular part;macromolecular complex;protein complex;TORC1 complex;TORC2 complex			9	9	9	12.2	12.2	12.2	122.07	0	77.481	889550000	366500000	523050000	0.0622523
-0.180715	-0.0539861	0.43534	0.108719	-0.664207	0.0357099	-0.659993	0.0303419	-0.210943	-0.149886	0.0365117	-0.210167	0.477193	0.119172	-0.669464	0.0391431	-0.665216	-0.212612	-0.151072	0.150515	-0.128816	0.317714	0.518793	0.464995	0.24761	0.340525	-0.374146	0.486639	0.121531	0.0399179	-0.681411	0.0408142	biological regulation;biosynthetic process;carbon catabolite regulation of transcription;cell communication;cellular biosynthetic process;cellular component organization;cellular component organization at cellular level;cellular component organization or biogenesis;cellular component organization or biogenesis at cellular level;cellular macromolecule biosynthetic process;cellular macromolecule me…	binding;catalytic activity;histone binding;methylated histone residue binding;methyltransferase activity;protein binding;S-adenosylmethionine-dependent methyltransferase activity;transferase activity;transferase activity, transferring one-carbon groups	cell part;chromatin;chromatin remodeling complex;chromatin silencing complex;chromosomal part;cytoplasm;heterochromatin;intracellular membrane-bounded organelle;intracellular non-membrane-bounded organelle;intracellular organelle;intracellular organelle part;intracellular part;macromolecular complex;membrane;membrane-bounded organelle;non-membrane-bounded organelle;nuclear part;nucleolus;nucleopl…			22	22	22	57.7	57.7	57.7	50.714	0	323.31	4031900000	2519700000	1512200000	0.180294
-0.481988	-0.162409	0.125965	0.144684	-0.558273	0.238006	-0.0797476	-0.0873939	0.0263645	0.171974	0.129821	-0.704119	0.138075	0.158594	-0.562691	0.260888	-0.0803787	0.0288992	0.188508	0.0908807	-0.179843	0.276222	-0.0639054	0.430296	-0.0391554	0.34695	-0.350576	0.140808	0.161733	0.266052	-0.0823355	0.145119	metabolic process;oxidation-reduction process	binding;cation binding;heme binding;ion binding;iron ion binding;metal ion binding;tetrapyrrole binding;transition metal ion binding	cell part;cytoplasmic part;integral to membrane;intracellular organelle part;intracellular part;intrinsic to membrane;membrane;membrane part;mitochondrial membrane;mitochondrial outer membrane;mitochondrial part;organelle membrane;organelle outer membrane;organelle part;outer membrane			6	6	6	62.3	62.3	62.3	16.332	0	142.59	7224700000	4322300000	2902500000	0.0773045
-0.809836	-0.895328	-0.0860152	-0.150446	-0.776414	-0.263173	-0.863222	-0.656564	-0.190976	-0.263912	-0.368667	-0.60379	-0.0866959	-0.151637	-0.782558	-0.265256	-0.870054	-0.192487	-0.266001	-0.317429	-0.507812	-0.000455577	-0.197521	0.12078	-0.176024	0.235304	-0.645355	-0.0888065	-0.155329	-0.271713	-0.891235	-0.380631	cellular macromolecule metabolic process;cellular metabolic process;cellular nitrogen compound metabolic process;cellular process;gene expression;macromolecule metabolic process;metabolic process;mRNA metabolic process;mRNA processing;nitrogen compound metabolic process;nuclear mRNA splicing, via spliceosome;nucleic acid metabolic process;nucleobase-containing compound metabolic process;primary m…	binding;nucleic acid binding;RNA binding;snRNA binding;U4 snRNA binding;U6 snRNA binding	Cajal body;cell part;intracellular membrane-bounded organelle;intracellular organelle;intracellular organelle part;intracellular part;macromolecular complex;membrane-bounded organelle;nuclear body;nuclear part;nuclear speck;nucleoplasm;nucleoplasm part;nucleus;organelle;organelle part;ribonucleoprotein complex;small nuclear ribonucleoprotein complex;spliceosomal complex;U4/U6 snRNP;U4/U6 x U5 tri…	Spliceosome		23	23	23	56.8	56.8	56.8	58.32	0	159.59	15330000000	9153000000	6177200000	0.107472
-5.4045	-2.82718	-2.20512	-3.81365	-3.41396	-3.34423	-1.10363	-5.13301	-3.59162	-4.02373	-4.53288	-2.98716	-2.22257	-3.84383	-3.44097	-3.37069	-1.11236	-3.62004	-4.05558	-3.87133	-6.23771	-4.14084	-1.39455	-2.17453	-3.97701	-2.17359	-3.54085	-2.27668	-3.93741	-3.45275	-1.13944	-4.67998	amine biosynthetic process;amine metabolic process;anatomical structure development;aspartate family amino acid metabolic process;biological regulation;biosynthetic process;brain development;carboxylic acid biosynthetic process;carboxylic acid metabolic process;cell cycle arrest;cell cycle process;cell development;cell projection organization;cellular amine metabolic process;cellular amino acid b…	binding;catalytic activity;coenzyme binding;cofactor binding;electron carrier activity;NAD binding;nucleotide binding;oxidoreductase activity;oxidoreductase activity, acting on CH-OH group of donors;oxidoreductase activity, acting on the CH-OH group of donors, NAD or NADP as acceptor;phosphoglycerate dehydrogenase activity	cell part;cytoplasmic part;cytosol;extracellular membrane-bounded organelle;extracellular organelle;extracellular region part;extracellular vesicular exosome;intracellular part;membrane-bounded organelle;membrane-bounded vesicle;organelle;vesicle	Glycine, serine and threonine metabolism;Methane metabolism		29	29	29	57.2	57.2	57.2	56.65	0	323.31	41149000000	9373300000	31776000000	0.911962
0.752878	0.732529	1.05749	1.02879	0.361251	1.11044	0.212591	0.777296	0.314686	0.846321	1.1585	0.765851	1.15915	1.12769	0.395981	1.2172	0.233029	0.34494	0.927686	1.08757	0.412713	1.05366	1.29885	0.825536	0.98015	1.06418	1.26007	1.1821	1.15001	1.24129	0.237642	1.29501	anatomical structure development;biological regulation;brain development;cAMP-mediated signaling;cellular component assembly;cellular component assembly at cellular level;cellular component biogenesis;cellular component organization;cellular component organization at cellular level;cellular component organization or biogenesis;cellular component organization or biogenesis at cellular level;cellul…	catalytic activity;NADH dehydrogenase (quinone) activity;NADH dehydrogenase (ubiquinone) activity;NADH dehydrogenase activity;oxidoreductase activity;oxidoreductase activity, acting on NADH or NADPH;oxidoreductase activity, acting on NADH or NADPH, quinone or similar compound as acceptor	cell part;cytoplasmic part;intracellular membrane-bounded organelle;intracellular organelle;intracellular organelle part;intracellular part;macromolecular complex;membrane;membrane part;membrane-bounded organelle;mitochondrial inner membrane;mitochondrial membrane;mitochondrial membrane part;mitochondrial part;mitochondrial respiratory chain complex I;mitochondrion;NADH dehydrogenase complex;orga…	Alzheimer's disease;Huntington's disease;Oxidative phosphorylation;Parkinson's disease		7	7	7	49.1	49.1	49.1	20.108	0	55.949	3051000000	2231200000	819840000	0.145525
-0.431315	-0.734804	NaN	-0.424466	0.535711	-0.139254	0.386787	-0.905957	NaN	0.236885	-0.515041	NaN	NaN	-0.427825	0.587214	-0.140356	0.423972	NaN	0.259659	0.0639861	-0.500722	NaN	-1.10302	NaN	-1.25649	NaN	0.76413	NaN	-0.438241	-0.143773	0.432364	-0.531755	antigen processing and presentation;antigen processing and presentation of exogenous antigen;antigen processing and presentation of exogenous peptide antigen;antigen processing and presentation of exogenous peptide antigen via MHC class II;antigen processing and presentation of peptide antigen;antigen processing and presentation of peptide antigen via MHC class II;antigen processing and presentat…	adenyl nucleotide binding;adenyl ribonucleotide binding;ATP binding;binding;catalytic activity;hydrolase activity;hydrolase activity, acting on acid anhydrides;hydrolase activity, acting on acid anhydrides, in phosphorus-containing anhydrides;microtubule motor activity;motor activity;nucleoside-triphosphatase activity;nucleotide binding;purine nucleotide binding;purine ribonucleoside triphosphate…	cell part;centrosome;cytoplasmic dynein complex;cytoplasmic part;cytoskeletal part;cytosol;dynein complex;intracellular non-membrane-bounded organelle;intracellular organelle;intracellular organelle part;intracellular part;macromolecular complex;membrane;microtubule;microtubule associated complex;microtubule organizing center;non-membrane-bounded organelle;organelle;organelle part;protein complex	Phagosome;Vasopressin-regulated water reabsorption		9	8	8	23.6	20.9	20.9	54.099	0	22.136	1184400000	898010000	286440000	0.614469
-0.282211	-0.503357	-0.65158	-0.794676	-0.202429	-0.519058	-0.303122	-0.517613	-0.319459	-0.694092	-0.57158	-0.232557	-0.656736	-0.800965	-0.204031	-0.523166	-0.305521	-0.321987	-0.699585	-0.736754	-0.681098	-0.806242	-0.768582	-1.11381	-0.752252	-0.775919	-0.553342	-0.672724	-0.820464	-0.535903	-0.312959	-0.590128	activation of immune response;activation of innate immune response;anaphase-promoting complex-dependent proteasomal ubiquitin-dependent protein catabolic process;antigen processing and presentation;antigen processing and presentation of exogenous antigen;antigen processing and presentation of exogenous peptide antigen;antigen processing and presentation of exogenous peptide antigen via MHC class …	enzyme regulator activity	cell part;cytoplasm;cytoplasmic part;cytosol;extracellular membrane-bounded organelle;extracellular organelle;extracellular region part;extracellular vesicular exosome;intracellular membrane-bounded organelle;intracellular organelle;intracellular organelle part;intracellular part;macromolecular complex;membrane;membrane-bounded organelle;membrane-bounded vesicle;nuclear part;nucleoplasm;nucleus;o…	Proteasome	+	30	30	30	62	62	62	60.977	0	323.31	28408000000	15254000000	13153000000	0.00094457
1.03761	0.41303	-0.542847	-1.07299	0.706353	1.2815	1.54844	1.37303	-0.981126	0.825178	0.73604	0.54713	-0.547143	-1.08148	0.774262	1.40471	1.6973	-0.98889	0.904511	0.993219	0.571996	1.03118	0.246887	-0.53826	0.94724	-0.105234	1.13745	-0.560463	-1.10781	1.43251	1.7309	0.822773	3'-phosphoadenosine 5'-phosphosulfate biosynthetic process;3'-phosphoadenosine 5'-phosphosulfate metabolic process;amine metabolic process;aminoglycan metabolic process;anatomical structure development;biosynthetic process;carbohydrate metabolic process;cellular biosynthetic process;cellular metabolic process;cellular nitrogen compound biosynthetic process;cellular nitrogen compound metabolic pro…	adenyl nucleotide binding;adenyl ribonucleotide binding;adenylylsulfate kinase activity;adenylyltransferase activity;ATP binding;binding;catalytic activity;kinase activity;nucleotide binding;nucleotidyltransferase activity;phosphotransferase activity, alcohol group as acceptor;purine nucleotide binding;purine ribonucleoside triphosphate binding;purine ribonucleotide binding;ribonucleotide binding…	cell part;cytoplasmic part;cytosol;intracellular part	Purine metabolism;Selenocompound metabolism;Sulfur metabolism		22	22	21	49.7	49.7	47.4	70.832	0	279.08	9329300000	6740400000	2588900000	0.99196
-0.319963	-0.363374	-0.0270292	-0.0613718	-0.459439	-0.108278	-0.359802	-0.31366	0.107531	-0.333161	-0.222832	-0.447604	-0.0272431	-0.0618575	-0.463075	-0.109135	-0.36265	0.117869	-0.335798	-0.323242	-0.452527	0.123205	-0.2601	-0.706261	-0.307104	0.0933665	-0.402584	-0.0279063	-0.0633634	-0.111792	-0.371478	-0.230063	biological regulation;cell cycle;cell cycle checkpoint;cell cycle phase;cell cycle process;cell division;cellular component assembly;cellular component organization;cellular component organization at cellular level;cellular component organization or biogenesis;cellular component organization or biogenesis at cellular level;cellular localization;cellular macromolecule localization;cellular process…	binding;centromeric DNA binding;DNA binding;nucleic acid binding;sequence-specific DNA binding	cell part;chromosomal part;condensed chromosome kinetochore;cytoplasm;cytoplasmic part;cytoskeletal part;cytosol;endoplasmic reticulum;endoplasmic reticulum membrane;endoplasmic reticulum part;intracellular membrane-bounded organelle;intracellular non-membrane-bounded organelle;intracellular organelle;intracellular organelle part;intracellular part;kinetochore;kinetochore microtubule;macromolecul…			27	26	26	47.4	46.6	46.6	88.828	0	169.61	6126100000	3515300000	2610800000	0.776077
-0.40976	-0.446216	0.097577	0.21423	-0.365329	0.0463887	-0.515143	-0.206775	-0.118561	-0.0636642	-0.0898492	-0.474586	0.106958	0.234826	-0.36822	0.0508485	-0.51922	-0.119499	-0.064168	-0.0174152	-0.0171207	0.373226	0.144666	0.354277	0.143995	0.423833	-0.553218	0.109075	0.239474	0.051855	-0.53186	-0.092765	biological regulation;cell cycle arrest;cell cycle process;cellular component assembly;cellular component assembly at cellular level;cellular component organization;cellular component organization at cellular level;cellular component organization or biogenesis;cellular component organization or biogenesis at cellular level;cellular macromolecular complex assembly;cellular macromolecular complex s…		Cajal body;catalytic step 2 spliceosome;cell part;cytoplasm;cytoplasmic part;cytosol;Golgi apparatus;intracellular membrane-bounded organelle;intracellular organelle;intracellular organelle part;intracellular part;macromolecular complex;membrane-bounded organelle;nuclear body;nuclear part;nucleoplasm;nucleoplasm part;organelle;organelle part;ribonucleoprotein complex;small nuclear ribonucleoprote…	Spliceosome	+	36	36	36	54.1	54.1	54.1	90.254	0	323.31	17416000000	9495200000	7921200000	0.0491688
-0.190366	-0.0354659	1.19488	0.68412	NaN	1.27362	0.546645	-0.0256857	0.40176	1.3	1.00085	NaN	1.30976	0.749891	NaN	1.39607	0.5992	0.440386	1.42498	-1.00184	-0.157621	0.591959	0.801479	-0.0214646	0.0924329	0.644174	-0.00435238	1.33568	0.764735	1.4237	0.61106	1.11879	attachment of GPI anchor to protein;biological regulation;cellular component assembly;cellular component organization;cellular component organization or biogenesis;cellular macromolecule metabolic process;cellular metabolic process;cellular process;cellular protein metabolic process;C-terminal protein amino acid modification;C-terminal protein lipidation;macromolecular complex assembly;macromolec…	binding;cytoskeletal protein binding;protein binding;tubulin binding	cell part;cytoplasmic part;endoplasmic reticulum membrane;endoplasmic reticulum part;GPI-anchor transamidase complex;intracellular organelle part;intracellular part;macromolecular complex;membrane;membrane part;organelle membrane;organelle part;protein complex	Glycosylphosphatidylinositol(GPI)-anchor biosynthesis	+	7	7	7	13.7	13.7	13.7	67.622	0	32.878	1906300000	1241700000	664610000	0.00341646
0.119273	0.709823	0.747664	0.776092	0.483837	NaN	0.723163	0.507643	0.92746	0.937816	0.521564	NaN	0.819545	0.850706	0.530353	NaN	0.792688	1.01663	1.02798	0.378064	1.37101	0.830242	NaN	0.254091	0.585725	0.290148	0.622276	0.835767	0.867545	NaN	0.808379	0.583023	cellular macromolecule metabolic process;cellular metabolic process;cellular nitrogen compound metabolic process;cellular process;cellular response to stimulus;cellular response to stress;DNA metabolic process;DNA recombination;DNA repair;double-strand break repair;double-strand break repair via homologous recombination;endosome transport;establishment of localization;establishment of localizatio…		AP-type membrane coat adaptor complex;cell part;cytoplasm;cytoplasmic part;intracellular membrane-bounded organelle;intracellular organelle;intracellular organelle part;intracellular part;macromolecular complex;membrane part;membrane-bounded organelle;nuclear part;nucleoplasm;nucleus;organelle;organelle part;protein complex			10	10	10	17.6	17.6	17.6	88.604	0	27.689	757370000	500930000	256440000	0.343826
1.13738	0.366608	-0.494783	-0.124051	0.350011	0.395665	0.617603	1.07191	0.820486	0.148187	0.201797	0.831085	-0.498699	-0.125033	0.383661	0.433704	0.67698	0.899367	0.162434	0.0638311	0.577456	-0.107809	0.12358	0.100452	0.303914	-0.831109	0.617098	-0.51084	-0.128076	0.442289	0.69038	0.225576	alcohol metabolic process;carbohydrate metabolic process;cellular carbohydrate metabolic process;cellular metabolic process;cellular process;inositol metabolic process;inositol phosphate metabolic process;metabolic process;organophosphate metabolic process;polyol metabolic process;primary metabolic process;small molecule metabolic process	acid phosphatase activity;adenyl nucleotide binding;adenyl ribonucleotide binding;ATP binding;binding;catalytic activity;diphosphoinositol-pentakisphosphate kinase activity;hydrolase activity;hydrolase activity, acting on ester bonds;inositol 1,3,4,5,6-pentakisphosphate kinase activity;inositol hexakisphosphate 1-kinase activity;inositol hexakisphosphate 3-kinase activity;inositol hexakisphosphat…	cell part;cytoplasmic part;cytosol;intracellular part			28	28	23	28.8	28.8	23.9	140.41	0	89.077	1987600000	1323500000	664050000	0.110527
-0.338779	-0.488196	-0.548256	-0.648164	-0.131339	-0.509005	-0.483194	-0.965723	-0.37024	-0.761179	-0.577352	-0.32305	-0.552595	-0.653294	-0.132378	-0.513033	-0.487018	-0.37317	-0.767203	-1.19812	-0.755125	-0.935257	-1.00858	-0.906822	-1.2297	-1.11002	-0.382066	-0.566048	-0.669198	-0.525523	-0.498874	-0.596088	amine metabolic process;amino acid activation;biological regulation;carboxylic acid metabolic process;cellular amine metabolic process;cellular amino acid metabolic process;cellular ketone metabolic process;cellular macromolecule metabolic process;cellular metabolic process;cellular nitrogen compound metabolic process;cellular process;gene expression;macromolecule metabolic process;metabolic proc…		cell part;cytoplasm;cytoplasmic part;cytosol;extracellular membrane-bounded organelle;extracellular organelle;extracellular region part;extracellular vesicular exosome;intracellular membrane-bounded organelle;intracellular organelle;intracellular part;membrane-bounded organelle;membrane-bounded vesicle;nucleus;organelle;vesicle		+	9	9	9	43.1	43.1	43.1	19.81	0	33.762	6992700000	3655100000	3337600000	0.000507491
0.258244	0.349237	0.773094	0.533883	0.0110575	0.472899	-0.087736	0.584533	0.3365	0.337426	0.595768	0.575223	0.847419	0.58521	0.0121206	0.518363	-0.0884304	0.368852	0.369866	0.571573	0.417057	0.970498	0.79502	0.865288	0.695023	0.924459	0.413293	0.864193	0.596794	0.528624	-0.0905832	0.665971	cellular macromolecule metabolic process;cellular metabolic process;cellular nitrogen compound metabolic process;cellular process;gene expression;macromolecule metabolic process;metabolic process;mRNA metabolic process;mRNA processing;nitrogen compound metabolic process;nuclear mRNA splicing, via spliceosome;nucleic acid metabolic process;nucleobase-containing compound metabolic process;primary m…	binding;nucleic acid binding;nucleotide binding;RNA binding	catalytic step 2 spliceosome;cell part;cytoplasm;intracellular organelle part;intracellular part;macromolecular complex;nuclear part;nucleoplasm;organelle part;ribonucleoprotein complex;spliceosomal complex			35	28	3	53.9	44.5	3	70.942	0	323.31	102000000000	72266000000	30169000000	0.0691377
-0.720343	-1.1383	-0.00561982	-0.0722316	-0.77319	-0.250013	-0.744581	-0.72831	-0.0717775	-0.3506	-0.357947	-0.506278	-0.0056643	-0.0728032	-0.779309	-0.251992	-0.750473	-0.0723455	-0.353375	-0.479341	-0.42811	0.0750138	-0.23785	0.133123	-0.249806	0.20513	-0.729265	-0.0058022	-0.0745756	-0.258127	-0.768744	-0.369563	assembly of spliceosomal tri-snRNP;cellular component assembly;cellular component assembly at cellular level;cellular component organization;cellular component organization at cellular level;cellular component organization or biogenesis;cellular component organization or biogenesis at cellular level;cellular macromolecular complex assembly;cellular macromolecular complex subunit organization;cell…	binding;identical protein binding;protein binding	Cajal body;cell part;cytoplasm;intracellular membrane-bounded organelle;intracellular organelle;intracellular organelle part;intracellular part;macromolecular complex;membrane-bounded organelle;nuclear body;nuclear part;nuclear speck;nucleoplasm;nucleoplasm part;nucleus;organelle;organelle part;ribonucleoprotein complex;small nuclear ribonucleoprotein complex;spliceosomal complex;U4/U6 x U5 tri-s…	Spliceosome		32	32	32	59.7	59.7	59.7	77.528	0	310.34	11274000000	6320400000	4953500000	0.207348
0.781756	1.05405	-1.00415	-0.585893	0.531542	-0.619045	0.22673	0.571959	-0.24463	-0.70855	-0.764712	0.719186	-1.01209	-0.590529	0.582644	-0.623944	0.248528	-0.246566	-0.714157	0.521153	0.0395392	-0.173771	0.158924	-0.792645	0.398989	-0.307154	0.970149	-1.03673	-0.604906	-0.639134	0.253447	-0.789528	biological regulation;cell redox homeostasis;cellular homeostasis;cellular macromolecule metabolic process;cellular metabolic process;cellular process;cellular protein metabolic process;cellular response to chemical stimulus;cellular response to oxidative stress;cellular response to stimulus;cellular response to stress;glycerol ether metabolic process;homeostatic process;macromolecule metabolic p…	catalytic activity;disulfide oxidoreductase activity;oxidoreductase activity;oxidoreductase activity, acting on a sulfur group of donors;oxidoreductase activity, acting on a sulfur group of donors, disulfide as acceptor;protein disulfide oxidoreductase activity	cell part;cytoplasm;extracellular membrane-bounded organelle;extracellular organelle;extracellular region part;extracellular vesicular exosome;intracellular membrane-bounded organelle;intracellular organelle;intracellular part;macromolecular complex;membrane-bounded organelle;membrane-bounded vesicle;nucleus;organelle;proteasome complex;protein complex;vesicle		+	18	18	18	77.2	77.2	77.2	32.251	0	323.31	16962000000	11319000000	5642900000	0.0329415
0.171907	0.0945301	-0.590692	-0.411896	0.704252	-0.0569257	0.910649	-0.210992	-0.320262	0.201741	-0.427946	-0.364357	-0.595367	-0.415155	0.771958	-0.0573762	0.998199	-0.322796	0.221136	-0.682405	0.123806	-1.05483	-0.499203	-0.611349	-0.890604	-1.12238	-0.396827	-0.609861	-0.425262	-0.058773	1.01796	-0.441833	biological regulation;regulation of biological process;regulation of cell proliferation;regulation of cellular process	binding;identical protein binding;protein binding;protein dimerization activity;protein heterodimerization activity;protein homodimerization activity	cell part;cytoplasm;cytoplasmic part;intracellular part;perinuclear region of cytoplasm		+	15	15	3	83.5	83.5	13.6	22.237	0	323.31	11562000000	7600500000	3961300000	0.0473148
-0.685632	0.153123	0.248216	NaN	-0.128808	0.355498	-0.158681	-0.601029	-0.174032	0.600366	-0.069556	NaN	0.272079	NaN	-0.129827	0.389676	-0.159936	-0.17541	0.658085	-0.350812	-0.611126	0.112407	0.103024	-0.364747	-0.124376	0.106825	0.112843	0.277465	NaN	0.397389	-0.16383	-0.0718132			cell part;cytoplasm;cytoplasmic part;ER membrane protein complex;intracellular membrane-bounded organelle;intracellular organelle;intracellular part;macromolecular complex;membrane;membrane-bounded organelle;mitochondrion;nucleus;organelle;protein complex			8	8	8	41	41	41	23.773	0	34.111	1213500000	726960000	486530000	0.300368
-0.255173	0.0620588	0.622486	0.315088	0.302255	-0.451756	0.381574	-0.277574	0.222259	0.466816	0.297256	-0.645213	0.682332	0.345381	0.331314	-0.455331	0.418258	0.243627	0.511696	-0.440305	-0.373785	-0.349916	-0.104048	0.573849	-0.470844	-0.238932	-0.652986	0.695838	0.352217	-0.466416	0.426537	0.332284	biological adhesion;biological regulation;cell adhesion;cell surface receptor linked signaling pathway;cell-cell adhesion;cellular process;cellular response to chemical stimulus;cellular response to fibroblast growth factor stimulus;cellular response to growth factor stimulus;cellular response to organic substance;cellular response to stimulus;enzyme linked receptor protein signaling pathway;fibr…	binding;fibroblast growth factor binding;growth factor binding;protein binding	cell part;cytoplasmic part;endomembrane system;extracellular membrane-bounded organelle;extracellular organelle;extracellular region part;extracellular vesicular exosome;intracellular membrane-bounded organelle;intracellular organelle;intracellular organelle part;intracellular part;membrane;membrane-bounded organelle;membrane-bounded vesicle;mitochondrion;nuclear part;nucleoplasm;nucleus;organell…			11	11	11	37.8	37.8	37.8	41.21	0	61.594	1871400000	1120600000	750870000	0.0508112
-0.879763	0.0792448	-0.711627	-0.615978	-0.503544	-0.802989	-1.04342	-1.15247	-0.81166	-0.686856	-0.991848	-1.44845	-0.717259	-0.620853	-0.507529	-0.809344	-1.05167	-0.818084	-0.692291	-1.4048	-1.13277	-1.23047	-1.09312	-0.744348	-1.98314	-1.46517	-1.10038	-0.73472	-0.635967	-0.829048	-1.07728	-1.02403	biological regulation;cell surface receptor linked signaling pathway;cellular process;cellular response to chemical stimulus;cellular response to cytokine stimulus;cellular response to organic substance;cellular response to stimulus;cytokine-mediated signaling pathway;posttranscriptional regulation of gene expression;regulation of biological process;regulation of biosynthetic process;regulation o…	binding;nucleic acid binding;RNA binding;RNA cap binding;translation factor activity, nucleic acid binding;translation initiation factor activity	cell part;cytoplasmic part;cytosol;eukaryotic translation initiation factor 4F complex;intracellular part;macromolecular complex;protein complex	RNA transport;Viral myocarditis	+	30	23	23	20.5	17	17	176.65	0	122.03	1879900000	921410000	958460000	0.0241035
-0.77612	-1.18538	-0.785208	-0.834205	-0.92789	-1.43983	-1.23585	-0.735411	-1.04773	-1.20011	-1.29495	-1.0184	-0.791422	-0.840806	-0.935233	-1.45122	-1.24563	-1.05602	-1.20961	-0.886813	-1.10404	-0.627841	-0.868471	-0.980554	-1.09254	-0.426875	-0.94119	-0.810689	-0.861276	-1.48655	-1.27596	-1.33697	biological regulation;cellular component assembly;cellular component organization;cellular component organization or biogenesis;cellular macromolecule metabolic process;cellular metabolic process;cellular nitrogen compound metabolic process;cellular process;cellular protein metabolic process;macromolecular complex assembly;macromolecular complex subunit organization;macromolecule metabolic proces…	binding;catalytic activity;cis-trans isomerase activity;cyclosporin A binding;drug binding;isomerase activity;peptide binding;peptidyl-prolyl cis-trans isomerase activity;ribonucleoprotein binding	cell part;cytoplasm;intracellular organelle part;intracellular part;macromolecular complex;nuclear body;nuclear part;nuclear speck;nucleoplasm part;organelle part;ribonucleoprotein complex;small nuclear ribonucleoprotein complex;spliceosomal complex;U4/U6 snRNP;U4/U6 x U5 tri-snRNP complex	Spliceosome		14	12	12	79.1	72.3	72.3	19.208	0	92.274	7368700000	3473200000	3895500000	0.131016
0.405843	0.268928	1.23276	0.655934	-0.140442	0.0199384	0.182523	0.445705	0.532322	0.725419	0.752832	0.0797173	1.35128	0.718996	-0.141554	0.0218553	0.200071	0.583499	0.795161	0.416576	0.636037	0.871132	1.04242	0.453556	0.862386	0.21878	0.902766	1.37803	0.733227	0.0222879	0.204031	0.841544	adult behavior;adult locomotory behavior;adult walking behavior;anatomical structure development;behavior;biological regulation;catabolic process;cell communication;cell development;cellular catabolic process;cellular component organization;cellular component organization at cellular level;cellular component organization or biogenesis;cellular component organization or biogenesis at cellular leve…	binding;catalytic activity;endopeptidase activity;hydrolase activity;peptidase activity;peptidase activity, acting on L-amino acid peptides;protein binding;serine hydrolase activity;serine-type endopeptidase activity;serine-type peptidase activity;unfolded protein binding	CD40 receptor complex;cell part;chromatin;chromosomal part;cytoplasmic part;cytoskeleton;cytosol;endoplasmic reticulum;endoplasmic reticulum membrane;endoplasmic reticulum part;internal side of plasma membrane;intracellular membrane-bounded organelle;intracellular non-membrane-bounded organelle;intracellular organelle;intracellular organelle part;intracellular part;macromolecular complex;membrane…	Parkinson's disease		8	8	8	21.6	21.6	21.6	48.84	0	60.015	5162000000	3494100000	1667900000	0.330269
0.66701	1.29306	-0.368603	-0.461388	0.532723	-0.0703208	1.08082	0.428568	-0.689899	0.284073	-0.478532	0.502842	-0.37152	-0.46504	0.583939	-0.0708773	1.18473	-0.695358	0.311383	0.101716	0.449119	0.136548	0.163252	-0.444253	0.0404139	-0.650843	0.565418	-0.380565	-0.476361	-0.0726028	1.20818	-0.494062	carbohydrate metabolic process;cellular aldehyde metabolic process;cellular metabolic process;cellular process;metabolic process;primary metabolic process;small molecule metabolic process;xenobiotic metabolic process	alcohol dehydrogenase (NADP+) activity;alditol:NADP+ 1-oxidoreductase activity;aldo-keto reductase (NADP) activity;catalytic activity;electron carrier activity;epoxide hydrolase activity;ether hydrolase activity;hydrolase activity;hydrolase activity, acting on ether bonds;oxidoreductase activity;oxidoreductase activity, acting on CH-OH group of donors;oxidoreductase activity, acting on the CH-OH …	cell part;cytoplasmic part;cytosol;extracellular membrane-bounded organelle;extracellular organelle;extracellular region part;extracellular vesicular exosome;Golgi apparatus;intracellular membrane-bounded organelle;intracellular organelle;intracellular part;membrane-bounded organelle;membrane-bounded vesicle;mitochondrion;organelle;vesicle			16	16	16	61	61	61	39.589	0	319.66	14481000000	10371000000	4110000000	0.66757
-0.953026	-2.16009	-0.9484	-1.99071	-2.4227	-1.71307	-1.01752	-1.18946	-1.40513	-1.42916	-1.10713	-2.34878	-0.955905	-2.00646	-2.44187	-1.72662	-1.02557	-1.41625	-1.44047	-1.22416	-3.93453	-5.90806	-0.458459	-0.907671	-0.681236	-1.81229	-2.83006	-0.979177	-2.05531	-1.76866	-1.05054	-1.14306	actin cytoskeleton organization;actin filament-based process;cellular component organization;cellular component organization at cellular level;cellular component organization or biogenesis;cellular component organization or biogenesis at cellular level;cellular process;cortical actin cytoskeleton organization;cortical cytoskeleton organization;cytoskeleton organization;organelle organization	structural molecule activity	adherens junction;anchoring junction;cell cortex part;cell junction;cell part;cell-substrate adherens junction;cell-substrate junction;cytoplasmic part;cytoskeletal part;extracellular membrane-bounded organelle;extracellular organelle;extracellular region part;extracellular vesicular exosome;extrinsic to membrane;focal adhesion;intracellular membrane-bounded organelle;intracellular organelle;intr…	Tight junction		40	40	2	46.6	46.6	6.1	112.59	0	271.5	5375300000	2316900000	3058400000	0.562757
-0.616686	-0.991818	-0.0892477	0.440108	-0.564796	0.0683244	-0.329376	-0.630473	0.269835	0.0862296	0.0464066	-0.364357	-0.089954	0.48242	-0.569266	0.0748931	-0.331982	0.295777	0.0945197	-0.960598	-0.0949837	-0.366179	-0.687161	-0.758681	-0.325798	-0.171625	-0.303393	-0.0921439	0.491969	0.0763755	-0.340064	0.051875			cell part;cytoplasmic membrane-bounded vesicle;cytoplasmic part;cytoplasmic vesicle;Golgi apparatus;Golgi apparatus part;integral to membrane;intracellular membrane-bounded organelle;intracellular organelle;intracellular organelle part;intracellular part;intrinsic to membrane;membrane;membrane part;membrane-bounded organelle;membrane-bounded vesicle;nuclear part;nucleoplasm;organelle;organelle pa…			17	17	17	37.1	37.1	37.1	45.879	0	246.17	2006500000	1188600000	817910000	0.0596962
0.634631	0.701652	0.967799	0.847149	0.584439	NaN	0.541661	0.583683	1.00687	1.0818	1.13173	1.17172	1.06084	0.928594	0.640627	NaN	0.593736	1.10367	1.1858	NaN	0.490149	0.74065	1.1191	-0.0926476	0.748618	0.956611	0.712857	1.08184	0.946974	NaN	0.605488	1.26509	biological regulation;cellular component organization;cellular component organization or biogenesis;cellular process;cellular response to acid;cellular response to amine stimulus;cellular response to amino acid stimulus;cellular response to chemical stimulus;cellular response to endogenous stimulus;cellular response to organic nitrogen;cellular response to organic substance;cellular response to s…		cell part;cytoplasmic part;cytosol;endosomal part;intracellular membrane-bounded organelle;intracellular organelle;intracellular organelle part;intracellular part;lysosome;lytic vacuole;macromolecular complex;membrane part;membrane-bounded organelle;organelle;organelle part;protein complex;Ragulator complex;vacuole			6	6	6	96.7	96.7	96.7	9.6138	0	323.31	2873700000	2129400000	744230000	0.367478
1.31189	1.1219	-0.700815	-0.601457	1.61367	0.752641	1.4132	1.55634	-0.483701	0.275222	0.230544	0.814258	-0.706361	-0.606217	1.76881	0.825	1.54907	-0.487529	0.301682	0.917996	1.23927	0.195688	0.18145	0.0434595	0.653217	-0.866574	0.793373	-0.723558	-0.620975	0.84133	1.57973	0.257711	actin cytoskeleton organization;actin filament organization;actin filament-based movement;actin filament-based process;actin polymerization or depolymerization;biological regulation;cellular component assembly;cellular component movement;cellular component organization;cellular component organization at cellular level;cellular component organization or biogenesis;cellular component organization o…	actin binding;binding;cytoskeletal protein binding;profilin binding;protein binding	actin cytoskeleton;actin filament;cell part;cell projection;cytoplasmic membrane-bounded vesicle;cytoplasmic part;cytoplasmic vesicle;cytoskeletal part;cytoskeleton;cytosol;intracellular membrane-bounded organelle;intracellular non-membrane-bounded organelle;intracellular organelle;intracellular organelle part;intracellular part;macromolecular complex;membrane-bounded organelle;membrane-bounded v…			11	11	11	28	28	28	51.258	0	88.952	3248900000	2380800000	868160000	0.660565
1.03993	0.233805	-0.460403	-0.0158438	1.25322	0.291242	0.771305	0.929888	0.322445	-0.0213625	-0.0558076	0.347868	-0.464047	-0.0159691	1.37371	0.319242	0.845459	0.353445	-0.0215315	0.656113	0.997473	-0.571074	-0.31897	0.650106	-0.156401	NaN	0.649743	-0.475344	-0.0163579	0.325561	0.862193	-0.0576187	associative learning;asymmetric cell division;behavior;biological regulation;cell cycle phase;cell cycle process;cell division;cell surface receptor linked signaling pathway;cellular component organization;cellular component organization at cellular level;cellular component organization or biogenesis;cellular component organization or biogenesis at cellular level;cellular process;cellular respons…	binding;cytoskeletal protein binding;enzyme activator activity;enzyme regulator activity;GDP-dissociation inhibitor activity;GTPase activator activity;GTPase regulator activity;microtubule binding;molecular transducer activity;nucleoside-triphosphatase regulator activity;protein binding;protein complex scaffold;receptor signaling complex scaffold activity;receptor signaling protein activity;signa…	cell junction;cell part;cell projection;cell projection part;centrosome;cytoplasm;cytoplasmic part;cytoskeletal part;dendrite;dendritic spine;intracellular membrane-bounded organelle;intracellular non-membrane-bounded organelle;intracellular organelle;intracellular organelle part;intracellular part;macromolecular complex;membrane;membrane-bounded organelle;microtubule;microtubule organizing cente…			16	16	4	37.8	37.8	9.4	61.446	0	122.25	1319100000	826480000	492580000	0.5685
0.129962	0.224603	-0.874989	-1.26497	0.162855	-1.05205	0.213123	-0.086507	-1.62656	-0.659978	-0.723456	-0.550204	-0.881914	-1.27498	0.178512	-1.06037	0.233613	-1.63943	-0.665201	-0.0536897	-0.474119	-0.241633	-0.409544	-1.196	-0.424047	-1.39634	-5.27e-05	-0.903384	-1.30602	-1.08619	0.238237	-0.746934	cap-independent translational initiation;cellular component assembly;cellular component assembly at cellular level;cellular component disassembly;cellular component disassembly at cellular level;cellular component organization;cellular component organization at cellular level;cellular component organization or biogenesis;cellular component organization or biogenesis at cellular level;cellular mac…	binding;nucleic acid binding;RNA binding;translation factor activity, nucleic acid binding;translation initiation factor activity				11	11	11	56.6	56.6	56.6	22.092	0	323.31	5753200000	3378800000	2374400000	0.65313
1.01028	-0.698009	-0.616213	1.52205	1.94507	1.63689	-0.673602	0.199262	1.7958	1.64611	0.759949	2.07203	-0.62109	1.66838	2.13207	1.79426	-0.678933	1.96844	1.80437	0.0531744	1.9857	-1.36863	-1.08754	0.916712	0.0586926	-1.00811	-1.01767	-0.63621	1.7014	1.82977	-0.695461	0.849499	biological adhesion;biological regulation;cell adhesion;cellular component organization;cellular component organization or biogenesis;cellular membrane organization;cellular process;cellular response to stimulus;defense response;endocytosis;establishment of localization;immune response;immune system process;inflammatory response;innate immune response;intracellular receptor mediated signaling pat…		actin filament bundle;actomyosin;actomyosin contractile ring;cell cortex part;cell division site part;cell part;cell projection;cleavage furrow;contractile ring;cytoplasmic part;cytoskeletal part;cytosol;intracellular organelle part;intracellular part;lamellipodium;membrane;organelle part;perinuclear region of cytoplasm;stress fiber;uropod	NOD-like receptor signaling pathway		15	15	15	42.3	42.3	42.3	47.591	0	74.624	1121900000	868790000	253110000	0.181081
-0.594527	-1.03175	-1.31328	-1.85648	-0.734119	-1.02043	-0.130025	-0.713644	-1.57989	-1.23636	-1.14014	-0.645213	-1.32368	-1.87117	-0.739929	-1.02851	-0.131054	-1.59239	-1.24615	-1.03327	-0.948776	-0.994016	-1.04352	-1.61973	-1.07239	-1.39065	-0.485262	-1.3559	-1.91673	-1.05355	-0.134244	-1.17714	establishment of localization;establishment of localization in cell;establishment of protein localization;establishment of RNA localization;intracellular protein transport;intracellular transport;nuclear export;nuclear transport;nucleic acid transport;nucleobase-containing compound transport;nucleocytoplasmic transport;protein transport;RNA export from nucleus;RNA transport;transport;tRNA export …	binding;nucleic acid binding;RNA binding;tRNA binding	cell part;cytoplasm;intracellular organelle part;intracellular part;nuclear part;nucleoplasm;organelle part	RNA transport		35	35	35	48.3	48.3	48.3	109.96	0	292.2	11358000000	5623400000	5734700000	0.753058
-0.262772	-0.919377	-1.74173	-2.19013	-0.374012	-2.59403	-0.334487	-1.08305	-1.77863	-1.85381	-1.90519	-0.371691	-1.75551	-2.20746	-0.376972	-2.61455	-0.337134	-1.7927	-1.86848	-1.67826	-0.816573	-2.75414	-0.99479	-1.48456	-1.25125	-1.57672	-0.199081	-1.79825	-2.2612	-2.67821	-0.345342	-1.96702	biological regulation;catabolic process;cell differentiation;cell proliferation;cellular catabolic process;cellular developmental process;cellular metabolic process;cellular nitrogen compound catabolic process;cellular nitrogen compound metabolic process;cellular process;deoxyribonucleoside monophosphate catabolic process;deoxyribonucleoside monophosphate metabolic process;deoxyribonucleotide cat…	catalytic activity;deoxyribonucleoside 5'-monophosphate N-glycosidase activity;hydrolase activity;hydrolase activity, acting on glycosyl bonds;hydrolase activity, hydrolyzing N-glycosyl compounds;nucleoside deoxyribosyltransferase activity;transferase activity;transferase activity, transferring glycosyl groups;transferase activity, transferring pentosyl groups	cell part;cytoplasm;extracellular membrane-bounded organelle;extracellular organelle;extracellular region part;extracellular vesicular exosome;intracellular membrane-bounded organelle;intracellular organelle;intracellular organelle part;intracellular part;membrane-bounded organelle;membrane-bounded vesicle;nuclear part;nucleoplasm;nucleus;organelle;organelle part;vesicle			8	8	8	60.9	60.9	60.9	19.108	0	160.37	3642300000	1739700000	1902500000	0.230683
-1.434	-0.836575	0.251975	-0.300695	-1.22328	-0.935926	-1.17477	-1.13323	-0.693538	-0.579305	-0.744864	-1.40795	0.2762	-0.303074	-1.23296	-0.943333	-1.18407	-0.699026	-0.583889	-0.966042	-1.1339	-0.378531	-0.362547	-0.343024	-0.779112	-0.411421	-0.871457	0.281667	-0.310453	-0.966298	-1.2129	-0.769036	cellular macromolecule metabolic process;cellular metabolic process;cellular process;cellular protein metabolic process;establishment of localization;establishment of localization in cell;establishment of protein localization;establishment of protein localization in mitochondrion;establishment of protein localization to organelle;intracellular protein transmembrane transport;intracellular protein…	active transmembrane transporter activity;adenyl nucleotide binding;adenyl ribonucleotide binding;ATP binding;binding;chaperone binding;macromolecule transmembrane transporter activity;nucleotide binding;P-P-bond-hydrolysis-driven protein transmembrane transporter activity;P-P-bond-hydrolysis-driven transmembrane transporter activity;primary active transmembrane transporter activity;protein bindi…	cell part;cytoplasmic part;intracellular membrane-bounded organelle;intracellular organelle;intracellular organelle lumen;intracellular organelle part;intracellular part;membrane;membrane-bounded organelle;membrane-enclosed lumen;mitochondrial inner membrane;mitochondrial matrix;mitochondrial membrane;mitochondrial part;mitochondrion;organelle;organelle inner membrane;organelle lumen;organelle me…			25	25	25	52.7	52.7	52.7	51.355	0	164.22	14652000000	7488900000	7163600000	0.421582
0.348445	0.0979523	-0.555061	-0.251697	0.403666	-0.0195956	0.516728	-0.188783	0.205515	0.22181	-0.0357995	0.171158	-0.559454	-0.253689	0.442474	-0.0197507	0.566406	0.225273	0.243135	-0.37126	0.180142	-0.364584	-0.459353	-0.439697	-0.344274	-0.903398	-0.00864055	-0.573074	-0.259865	-0.0202315	0.577618	-0.0369612	cellular process;establishment of localization;transport;vesicle-mediated transport		cell part;cytoplasmic part;endoplasmic reticulum;Golgi apparatus;intracellular membrane-bounded organelle;intracellular organelle;intracellular part;membrane-bounded organelle;organelle		+	8	8	8	49.4	49.4	49.4	20.274	0	64.962	4518500000	2849000000	1669500000	0.0410889
0.482989	0.0142418	-0.792593	-0.805875	0.652176	0.255254	0.624667	0.225752	-0.21315	0.2015	-0.419371	-0.16834	-0.798865	-0.812252	0.714876	0.279794	0.684723	-0.214836	0.220872	-0.32047	0.183979	-0.929425	-0.837077	-0.196406	-0.43591	-1.03731	-0.238199	-0.818313	-0.832026	0.285332	0.698276	-0.43298	biological regulation;cell cycle process;cellular component assembly;cellular component assembly at cellular level;cellular component organization;cellular component organization at cellular level;cellular component organization or biogenesis;cellular component organization or biogenesis at cellular level;cellular macromolecular complex assembly;cellular macromolecular complex subunit organizatio…	alcohol binding;amine binding;binding;cation binding;ion binding;lipid binding;phosphatidylcholine binding;phospholipid binding;protein binding;protein domain specific binding;quaternary ammonium group binding	cell part;cytoplasmic part;cytosol;endosomal part;endosome membrane;extracellular membrane-bounded organelle;extracellular organelle;extracellular region part;extracellular vesicular exosome;intracellular organelle part;intracellular part;late endosome membrane;macromolecular complex;membrane;membrane coat;membrane part;membrane-bounded organelle;membrane-bounded vesicle;organelle;organelle membr…	Endocytosis		9	9	9	30.6	30.6	30.6	25.104	0	74.286	4983800000	3135200000	1848600000	0.173178
-0.329721	-0.184833	0.48583	0.227068	-0.576272	0.0651336	-0.307577	-0.112186	0.0919387	0.0346491	0.150511	-0.0867161	0.532537	0.248898	-0.580832	0.0713955	-0.310012	0.100778	0.0379802	0.0882014	0.0605012	0.580038	0.356384	0.396195	0.302426	0.679868	0.208522	0.543078	0.253825	0.0728087	-0.317559	0.168247	biological regulation;cellular localization;cellular macromolecule localization;cellular macromolecule metabolic process;cellular metabolic process;cellular nitrogen compound metabolic process;cellular process;cellular protein localization;cellular response to stimulus;gene expression;localization;macromolecule localization;macromolecule metabolic process;metabolic process;mRNA metabolic process;…	molecular transducer activity;protein binding transcription factor activity;signal transducer activity;transcription cofactor activity;transcription corepressor activity;transcription factor binding transcription factor activity	catalytic step 2 spliceosome;cell part;intracellular membrane-bounded organelle;intracellular organelle;intracellular organelle part;intracellular part;macromolecular complex;membrane-bounded organelle;nuclear body;nuclear part;nuclear speck;nucleoplasm;nucleoplasm part;nucleus;organelle;organelle part;ribonucleoprotein complex;spliceosomal complex	Spliceosome	+	19	19	19	49.2	49.2	49.2	57.193	0	266.41	7645800000	4890500000	2755300000	0.0162813
-0.371703	-2.99959	-1.67671	-2.13848	-0.912082	-0.971266	NaN	NaN	-0.973587	-0.734549	-3.0236	NaN	-1.68997	-2.1554	-0.9193	-0.978953	NaN	-0.981292	-0.740363	-3.33701	-2.94549	-1.91486	-1.68478	NaN	NaN	-1.38172	0.426088	-1.73112	-2.20788	-1.00279	NaN	-3.12173	biological regulation;cell cycle process;cellular process;cellular response to stimulus;cytokinesis;intracellular signal transduction;microtubule-based process;mitotic spindle elongation;regulation of biological process;regulation of cellular process;response to stimulus;signal transduction;small GTPase mediated signal transduction;spindle elongation	binding;cytoskeletal protein binding;enzyme binding;identical protein binding;kinase binding;kinesin binding;protein binding;protein kinase binding	cell part;cytoplasm;cytoplasmic part;cytoskeletal part;cytoskeleton;cytosol;intracellular membrane-bounded organelle;intracellular non-membrane-bounded organelle;intracellular organelle;intracellular organelle part;intracellular part;macromolecular complex;membrane;membrane-bounded organelle;microtubule;microtubule cytoskeleton;non-membrane-bounded organelle;nuclear part;nucleoplasm;nucleus;organ…			11	11	10	22.6	22.6	21.6	70.19	0	47.395	692560000	340010000	352550000	0.683694
0.150935	1.36758	-0.386386	NaN	1.40769	0.14128	0.7489	-1.02201	-0.407756	NaN	-0.191478	0.393669	-0.389444	NaN	1.54302	0.154863	0.820899	-0.410982	NaN	-0.727595	0.672329	-0.907822	-0.977109	-1.26248	-0.0867845	-0.80942	-0.927424	-0.398925	NaN	0.157928	0.837148	-0.197691	biological regulation;negative regulation of biological process;negative regulation of cell communication;negative regulation of cellular process;negative regulation of G-protein coupled receptor protein signaling pathway;negative regulation of response to stimulus;negative regulation of signal transduction;negative regulation of signaling;positive regulation of catalytic activity;positive regula…	enzyme activator activity;enzyme regulator activity;GTPase activator activity;GTPase regulator activity;nucleoside-triphosphatase regulator activity	axon part;axon terminus;cell body;cell part;cell projection;cell projection part;cytoplasm;dendritic spine;intracellular membrane-bounded organelle;intracellular organelle;intracellular part;membrane;membrane-bounded organelle;neuron projection;neuron projection terminus;neuron spine;neuronal cell body;nucleus;organelle;plasma membrane			10	10	10	70.2	70.2	70.2	21.21	0	151.01	1709800000	867720000	842080000	0.108223
0.0975743	-0.239007	-0.130958	0.234579	-0.106941	0.285794	-0.268697	0.106941	-0.121911	0.0635893	0.0563411	-0.0220327	-0.131994	0.257132	-0.107788	0.31327	-0.270823	-0.122876	0.0697028	0.262223	-0.192085	0.25969	0.276342	0.345121	0.293128	0.4801	-0.185357	-0.135208	0.262222	0.319471	-0.277417	0.0629802	attachment of spindle microtubules to chromosome;attachment of spindle microtubules to kinetochore;biological regulation;cell cycle checkpoint;cell cycle process;cell division;cellular component organization;cellular component organization at cellular level;cellular component organization or biogenesis;cellular component organization or biogenesis at cellular level;cellular process;chromosome org…	binding;carbohydrate binding;cation binding;cytoskeletal protein binding;DNA binding;glycosaminoglycan binding;heparin binding;ion binding;metal ion binding;microtubule binding;nucleic acid binding;nucleic acid binding transcription factor activity;pattern binding;polysaccharide binding;protein binding;sequence-specific DNA binding transcription factor activity;transition metal ion binding;tubuli…	cell part;chromosomal part;condensed chromosome kinetochore;cytoskeletal part;intracellular membrane-bounded organelle;intracellular non-membrane-bounded organelle;intracellular organelle;intracellular organelle part;intracellular part;kinetochore;macromolecular complex;membrane-bounded organelle;microtubule;non-membrane-bounded organelle;nuclear part;nucleolus;nucleus;organelle;organelle part;pr…			7	7	7	16.4	16.4	16.4	49.692	0	106.89	11628000000	7641300000	3986700000	0.210458
0.351022	0.189343	-0.180419	NaN	0.174473	0.158712	0.348896	-0.064809	0.423176	0.306703	0.620161	0.0651131	-0.181847	NaN	0.191247	0.173971	0.382439	0.46386	0.33619	0.25298	0.020357	0.451591	0.374162	0.313462	0.414834	0.442624	0.308862	-0.186274	NaN	0.177415	0.390009	0.693239	cellular metabolic process;cellular process;electron transport chain;generation of precursor metabolites and energy;metabolic process;mitochondrial electron transport, NADH to ubiquinone;oxidation-reduction process;respiratory electron transport chain;small molecule metabolic process	catalytic activity;NADH dehydrogenase (quinone) activity;NADH dehydrogenase (ubiquinone) activity;NADH dehydrogenase activity;oxidoreductase activity;oxidoreductase activity, acting on NADH or NADPH;oxidoreductase activity, acting on NADH or NADPH, quinone or similar compound as acceptor	cell part;cytoplasmic part;integral to membrane;intracellular membrane-bounded organelle;intracellular organelle;intracellular organelle part;intracellular part;intrinsic to membrane;macromolecular complex;membrane;membrane part;membrane-bounded organelle;mitochondrial inner membrane;mitochondrial membrane;mitochondrial membrane part;mitochondrial part;mitochondrial respiratory chain complex I;mi…	Alzheimer's disease;Huntington's disease;Oxidative phosphorylation;Parkinson's disease		7	7	7	43.8	43.8	43.8	15.667	0	100.73	1814700000	1156200000	658510000	0.785241
0.532037	0.718663	1.38427	1.05357	0.453906	1.31745	0.177965	0.64142	0.706385	0.635823	1.01764	0.612643	1.51735	1.15486	0.497545	1.44411	0.195075	0.774297	0.696952	0.901069	0.322172	1.02616	1.08209	0.801386	0.990347	0.813695	0.803927	1.54738	1.17772	1.47269	0.198936	1.13755	cellular metabolic process;cellular process;electron transport chain;generation of precursor metabolites and energy;metabolic process;mitochondrial electron transport, NADH to ubiquinone;oxidation-reduction process;respiratory electron transport chain;small molecule metabolic process	catalytic activity;NADH dehydrogenase (quinone) activity;NADH dehydrogenase (ubiquinone) activity;NADH dehydrogenase activity;oxidoreductase activity;oxidoreductase activity, acting on NADH or NADPH;oxidoreductase activity, acting on NADH or NADPH, quinone or similar compound as acceptor	cell part;cytoplasmic part;extracellular membrane-bounded organelle;extracellular organelle;extracellular region part;extracellular vesicular exosome;integral to membrane;intracellular organelle part;intracellular part;intrinsic to membrane;macromolecular complex;membrane;membrane part;membrane-bounded organelle;membrane-bounded vesicle;mitochondrial inner membrane;mitochondrial membrane;mitochon…	Alzheimer's disease;Huntington's disease;Oxidative phosphorylation;Parkinson's disease		5	5	5	36.7	36.7	36.7	11.402	0	11.282	2774000000	1991400000	782580000	0.215808
0.062125	0.45872	0.938345	1.07705	0.489276	0.925484	-0.140716	0.12989	0.768661	0.872255	0.906207	0.469113	1.02856	1.1806	0.536315	1.01446	-0.14183	0.84256	0.956114	0.879862	-0.0923697	1.01188	1.23439	0.382205	0.805774	0.748435	0.650745	1.04892	1.20397	1.03454	-0.145282	1.01299	cellular metabolic process;cellular process;electron transport chain;generation of precursor metabolites and energy;metabolic process;mitochondrial electron transport, NADH to ubiquinone;oxidation-reduction process;respiratory electron transport chain;small molecule metabolic process	catalytic activity;NADH dehydrogenase (quinone) activity;NADH dehydrogenase (ubiquinone) activity;NADH dehydrogenase activity;oxidoreductase activity;oxidoreductase activity, acting on NADH or NADPH;oxidoreductase activity, acting on NADH or NADPH, quinone or similar compound as acceptor	cell part;cytoplasmic part;intracellular organelle part;intracellular part;macromolecular complex;membrane;membrane part;mitochondrial inner membrane;mitochondrial membrane;mitochondrial membrane part;mitochondrial part;mitochondrial respiratory chain complex I;NADH dehydrogenase complex;organelle inner membrane;organelle membrane;organelle part;protein complex;respiratory chain complex I	Alzheimer's disease;Huntington's disease;Oxidative phosphorylation;Parkinson's disease		6	6	6	47.5	47.5	47.5	10.921	0	47.448	4306200000	3093100000	1213100000	0.345343
0.665162	0.593112	0.0271268	-0.0221703	0.704858	0.216919	0.526238	0.421379	0.213581	0.16751	-0.101749	0.792966	0.0297348	-0.0223458	0.772623	0.237774	0.576831	0.234115	0.183614	0.0944429	0.394119	0.396551	0.446497	-0.320999	0.154288	-0.14387	0.277933	0.0303234	-0.0228898	0.242481	0.588249	-0.105051	anion transport;biological regulation;cellular localization;cellular macromolecule localization;cellular macromolecule metabolic process;cellular metabolic process;cellular process;cellular protein localization;cellular protein metabolic process;cellular response to chemical stimulus;cellular response to organic substance;cellular response to stimulus;cellular response to stress;cellular response…	adenyl nucleotide binding;adenyl ribonucleotide binding;anion transmembrane transporter activity;arsenite transmembrane transporter activity;ATP binding;ATPase activity;binding;catalytic activity;cation binding;hydrolase activity;hydrolase activity, acting on acid anhydrides;hydrolase activity, acting on acid anhydrides, in phosphorus-containing anhydrides;inorganic anion transmembrane transporte…	cell part;cytoplasm;cytoplasmic part;endoplasmic reticulum membrane;endoplasmic reticulum part;extracellular membrane-bounded organelle;extracellular organelle;extracellular region part;extracellular vesicular exosome;intracellular membrane-bounded organelle;intracellular non-membrane-bounded organelle;intracellular organelle;intracellular organelle part;intracellular part;membrane;membrane part;…			15	15	15	69	69	69	38.792	0	302.67	14320000000	9931800000	4388200000	0.109841
-0.404329	-0.338735	-0.107299	-0.18611	-0.31349	-0.0790805	-0.624177	-0.402743	-0.407161	-0.223216	-0.13728	-0.141816	-0.108148	-0.187583	-0.315971	-0.0797063	-0.629117	-0.410384	-0.224983	0.0151053	-0.811158	0.0429659	-0.00266311	-0.0857909	-0.0431167	0.307108	-0.182536	-0.110781	-0.19215	-0.0816468	-0.644433	-0.141735	anaphase-promoting complex-dependent proteasomal ubiquitin-dependent protein catabolic process;attachment of spindle microtubules to chromosome;attachment of spindle microtubules to kinetochore;biological regulation;catabolic process;cell cycle;cell cycle checkpoint;cell cycle process;cell division;cellular catabolic process;cellular component organization;cellular component organization at cellu…		cell part;chromosomal part;condensed chromosome kinetochore;cytoplasmic part;cytosol;intracellular non-membrane-bounded organelle;intracellular organelle;intracellular organelle part;intracellular part;kinetochore;macromolecular complex;non-membrane-bounded organelle;nuclear part;nucleoplasm;organelle;organelle part;protein complex	Cell cycle;Cell cycle - yeast		16	16	16	61.3	61.3	61.3	36.954	0	323.31	27236000000	16764000000	10471000000	0.309971
0.713861	0.895006	-0.461295	-0.461639	0.940482	0.813317	0.840505	0.378587	1.07732	0.561698	0.407674	1.13961	-0.464946	-0.465292	1.0309	0.891509	0.921311	1.1809	0.6157	0.500473	0.837057	0.267591	-0.00977068	0.0234868	-0.283422	-0.910523	0.835141	-0.476265	-0.47662	0.909156	0.939548	0.455713	actin cytoskeleton organization;actin filament bundle assembly;actin filament organization;actin filament-based process;biological regulation;blood coagulation;cell activation;cell junction assembly;cell junction organization;cell-cell junction assembly;cell-cell junction organization;cellular component assembly;cellular component assembly at cellular level;cellular component organization;cellula…	actin binding;actin filament binding;binding;calcium ion binding;cation binding;cytoskeletal protein binding;hormone receptor binding;identical protein binding;integrin binding;ion binding;ligand-dependent nuclear receptor transcription coactivator activity;metal ion binding;nuclear hormone receptor binding;nucleoside binding;protein binding;protein binding transcription factor activity;protein c…	actin filament bundle;actomyosin;adherens junction;anchoring junction;cell cortex part;cell junction;cell part;cell projection;cell-cell junction;cell-substrate adherens junction;cell-substrate junction;contractile fiber part;cortical cytoskeleton;cytoplasm;cytoplasmic membrane-bounded vesicle lumen;cytoplasmic part;cytoplasmic vesicle part;cytoskeletal part;cytoskeleton;extracellular membrane-bo…	Adherens junction;Amoebiasis;Arrhythmogenic right ventricular cardiomyopathy (ARVC);Focal adhesion;Leukocyte transendothelial migration;Regulation of actin cytoskeleton;Systemic lupus erythematosus;Tight junction		70	47	46	79.5	56.9	55.7	104.85	0	323.31	143000000000	104000000000	39375000000	0.256119
0.201814	0.79914	0.51339	0.659617	0.190842	0.53294	0.379585	0.786748	0.833647	-0.046244	0.672531	0.473693	0.562747	0.723033	0.20919	0.584177	0.416079	0.913794	-0.04661	0.111828	0.412355	1.17188	0.555191	NaN	0.760888	0.207647	1.12811	0.573886	0.737345	0.59574	0.424314	0.75178	amine catabolic process;amine metabolic process;aromatic amino acid family catabolic process;aromatic amino acid family metabolic process;aromatic compound catabolic process;carboxylic acid catabolic process;carboxylic acid metabolic process;catabolic process;cellular amine metabolic process;cellular amino acid catabolic process;cellular amino acid metabolic process;cellular aromatic compound met…	antioxidant activity;binding;catalytic activity;cis-trans isomerase activity;glutathione peroxidase activity;glutathione transferase activity;identical protein binding;isomerase activity;maleylacetoacetate isomerase activity;oxidoreductase activity;oxidoreductase activity, acting on peroxide as acceptor;peroxidase activity;protein binding;protein dimerization activity;protein homodimerization act…	cell part;cytoplasmic part;cytosol;intracellular membrane-bounded organelle;intracellular organelle;intracellular part;membrane-bounded organelle;mitochondrion;organelle	Drug metabolism - cytochrome P450;Glutathione metabolism;Metabolism of xenobiotics by cytochrome P450;Styrene degradation;Tyrosine metabolism		8	8	8	44.9	44.9	44.9	24.212	0	40.66	1714300000	1214100000	500240000	0.859571
NaN	-1.32524	-0.62496	-0.75447	NaN	-1.59909	NaN	-0.90438	-1.30184	-1.47043	-1.11671	-1.56133	-0.629905	-0.760441	NaN	-1.61174	NaN	-1.31214	-1.48207	-1.31847	-1.23712	-0.578096	-0.561881	-0.523707	-0.863785	-0.31754	-0.613265	-0.64524	-0.778953	-1.65098	NaN	-1.15295	biological regulation;biosynthetic process;cellular biosynthetic process;cellular component organization;cellular component organization at cellular level;cellular component organization or biogenesis;cellular component organization or biogenesis at cellular level;cellular macromolecule biosynthetic process;cellular macromolecule metabolic process;cellular metabolic process;cellular nitrogen comp…	catalytic activity;methyltransferase activity;transferase activity;transferase activity, transferring one-carbon groups	cell part;cytoplasm;intracellular non-membrane-bounded organelle;intracellular organelle;intracellular organelle part;intracellular part;non-membrane-bounded organelle;nuclear part;nucleolus;organelle;organelle part	Histidine metabolism;Polycyclic aromatic hydrocarbon degradation;Tyrosine metabolism		5	5	5	22.1	22.1	22.1	31.88	0	52.421	1560300000	715700000	844580000	0.163058
-0.804035	-0.436936	0.394812	NaN	-1.24909	-0.193568	-0.88576	-0.468404	-0.505566	-0.455531	-0.094127	-1.03067	0.43277	NaN	-1.25897	-0.1951	-0.89277	-0.509567	-0.459136	-0.0472161	-0.494084	0.370111	-0.210561	-0.327202	-0.164841	-0.128878	-0.0329105	0.441336	NaN	-0.19985	-0.914504	-0.0971816	amine metabolic process;amino acid activation;biological regulation;biosynthetic process;carboxylic acid metabolic process;cellular amine metabolic process;cellular amino acid metabolic process;cellular biosynthetic process;cellular component organization;cellular component organization at cellular level;cellular component organization or biogenesis;cellular component organization or biogenesis a…	adenyl nucleotide binding;adenyl ribonucleotide binding;ATP binding;binding;carbon-nitrogen ligase activity, with glutamine as amido-N-donor;catalytic activity;glutaminyl-tRNA synthase (glutamine-hydrolyzing) activity;ligase activity;ligase activity, forming carbon-nitrogen bonds;nucleotide binding;purine nucleotide binding;purine ribonucleoside triphosphate binding;purine ribonucleotide binding;…	cell part;cytoplasmic part;glutamyl-tRNA(Gln) amidotransferase complex;intracellular membrane-bounded organelle;intracellular organelle;intracellular part;macromolecular complex;membrane-bounded organelle;mitochondrion;organelle;protein complex			5	5	5	52.9	52.9	52.9	15.086	0	20.963	546810000	287240000	259570000	0.134277
0.527483	1.0646	1.15312	0.838378	0.299436	1.23768	0.932384	0.680422	0.377686	1.00299	1.13765	0.750136	1.26399	0.91898	0.328224	1.35667	1.02202	0.413996	1.09942	0.827357	0.833812	1.22972	1.18093	0.951672	1.26963	0.937655	0.840089	1.28901	0.937171	1.38352	1.04225	1.27171	biological regulation;biosynthetic process;cellular biosynthetic process;cellular macromolecule biosynthetic process;cellular macromolecule metabolic process;cellular metabolic process;cellular nitrogen compound metabolic process;cellular process;macromolecule biosynthetic process;macromolecule metabolic process;metabolic process;nitrogen compound metabolic process;nucleic acid metabolic process;…	binding;nucleotide binding	cell part;intracellular membrane-bounded organelle;intracellular organelle;intracellular organelle part;intracellular part;membrane-bounded organelle;nuclear part;nucleoplasm;nucleus;organelle;organelle part		+	43	43	43	60.5	60.5	60.5	85.852	0	323.31	6710800000	5076500000	1634300000	0.0195762
0.0445964	0.520024	0.05326	0.227098	0.32728	0.11291	0.128633	-0.282268	0.261706	0.334049	0.0815249	0.107406	0.0583804	0.248931	0.358745	0.123765	0.141	0.286866	0.366164	-0.615632	-0.170933	-0.46936	-0.322798	-0.135769	-0.502507	-0.357452	-0.440049	0.059536	0.253859	0.126215	0.143791	0.0911316	antigen processing and presentation;antigen processing and presentation of exogenous antigen;antigen processing and presentation of exogenous peptide antigen;antigen processing and presentation of exogenous peptide antigen via MHC class II;antigen processing and presentation of peptide antigen;antigen processing and presentation of peptide antigen via MHC class II;antigen processing and presentat…	binding;cytoskeletal protein binding;enzyme binding;GTPase binding;GTP-dependent protein binding;kinesin binding;protein binding;protein transporter activity;Rab GTPase binding;Ras GTPase binding;small GTPase binding;substrate-specific transporter activity;transporter activity	AP-type membrane coat adaptor complex;cell part;clathrin adaptor complex;clathrin coated vesicle membrane;clathrin-coated endocytic vesicle membrane;clathrin-coated vesicle;coated vesicle;coated vesicle membrane;cytoplasm;cytoplasmic membrane-bounded vesicle;cytoplasmic part;cytoplasmic vesicle;cytoplasmic vesicle membrane;cytoplasmic vesicle part;cytosol;endocytic vesicle membrane;endosome;Golgi…	Lysosome	+	33	33	33	48.1	48.1	48.1	91.35	0	323.31	16559000000	10949000000	5610100000	4.9678e-07
-0.394199	NaN	-0.316414	NaN	-0.388569	-0.745906	NaN	-0.811169	NaN	0.283799	-0.55134	NaN	-0.318918	NaN	-0.391644	-0.751809	NaN	NaN	0.311083	NaN	NaN	-1.49663	-0.961451	NaN	-1.10334	-0.642923	NaN	-0.326682	NaN	-0.770112	NaN	-0.569232	biological regulation;cellular component organization;cellular component organization at cellular level;cellular component organization or biogenesis;cellular component organization or biogenesis at cellular level;cellular membrane fusion;cellular membrane organization;cellular process;endosome organization;endosome transport;establishment of localization;establishment of localization in cell;est…	binding;protein binding;SNAP receptor activity;SNARE binding;syntaxin binding	cell part;clathrin-coated vesicle;coated vesicle;cytoplasmic membrane-bounded vesicle;cytoplasmic part;cytoplasmic vesicle;early endosome;endosome;Golgi apparatus;Golgi apparatus part;Golgi membrane;integral to membrane;intracellular membrane-bounded organelle;intracellular organelle;intracellular organelle part;intracellular part;intrinsic to membrane;macromolecular complex;membrane;membrane par…	SNARE interactions in vesicular transport		7	7	7	41.6	41.6	41.6	29.176	0	98.59	686520000	344270000	342260000	0.0553302
-0.405417	-0.747537	-0.0320025	0.670196	-0.00380507	-0.367874	0.128115	-0.489605	0.812969	0.311373	-0.0756345	-0.226158	-0.0322557	0.734629	-0.00383518	-0.370786	0.140432	0.891128	0.341308	-0.299721	0.382314	-1.42788	-0.263323	0.169635	-0.570518	0.156903	-0.825828	-0.033041	0.74917	-0.379813	0.143211	-0.0780889	establishment of localization;establishment of localization in cell;establishment of protein localization;intracellular protein transport;intracellular transport;protein targeting;protein transport;transport		cell part;clathrin coated vesicle membrane;coated vesicle membrane;cytoplasmic part;cytoplasmic vesicle membrane;cytoplasmic vesicle part;extracellular membrane-bounded organelle;extracellular organelle;extracellular region part;extracellular vesicular exosome;integral to membrane;intracellular organelle part;intracellular part;intrinsic to membrane;membrane;membrane part;membrane-bounded organel…			6	6	6	25.5	25.5	25.5	30.375	0	14.246	5123600000	3216500000	1907200000	0.243659
-0.691047	-0.906132	-1.24918	-1.47727	-0.816598	-1.15363	-0.706489	-1.04097	-1.09343	-1.23034	-1.30116	-0.941001	-1.25907	-1.48896	-0.82306	-1.16276	-0.71208	-1.10208	-1.24008	-0.820684	-1.06919	-1.2763	-1.11882	-1.57872	-1.2254	-1.33758	-0.758924	-1.28972	-1.52521	-1.19107	-0.729415	-1.34338	viral reproduction		cell part;cytoplasm;intracellular part			12	12	12	39.3	39.3	39.3	34.063	0	159.99	5777500000	2781400000	2996100000	0.125889
0.368397	-0.455876	-1.40548	-1.66436	0.21392	-1.1176	0.303239	-0.0910632	NaN	NaN	-2.05519	-0.267385	-1.4166	-1.67754	0.234486	-1.12645	0.332392	NaN	NaN	-0.0525075	-0.2907	-0.680599	-0.650516	NaN	-1.03607	NaN	-0.226029	-1.45109	-1.71837	-1.15387	0.338971	-2.12188	biological regulation;cell cycle;cell cycle phase;cell cycle process;cell division;cellular component organization;cellular component organization at cellular level;cellular component organization or biogenesis;cellular component organization or biogenesis at cellular level;cellular process;establishment of localization;G2/M transition of mitotic cell cycle;mitosis;mitotic cell cycle;negative reg…	binding;channel inhibitor activity;channel regulator activity;enzyme binding;enzyme inhibitor activity;enzyme regulator activity;ion channel inhibitor activity;phosphatase binding;phosphatase inhibitor activity;phosphatase regulator activity;potassium channel inhibitor activity;potassium channel regulator activity;protein binding;protein phosphatase 2A binding;protein phosphatase binding;protein …	cell part;cytoplasm;intracellular organelle part;intracellular part;nuclear part;nucleoplasm;organelle part			13	13	12	85.1	85.1	76	13.389	0	323.31	1861600000	1139300000	722370000	0.212552
1.79229	2.0623	2.65596	2.29238	1.32624	2.957	2.1569	1.88327	1.78575	2.87449	3.09647	1.60332	2.91131	2.51277	1.45375	3.24128	2.36427	1.95743	3.15085	2.37473	2.51426	2.56716	3.23325	1.92037	1.90274	2.06485	2.31483	2.96894	2.56251	3.30544	2.41107	3.46135	amine transport;amino acid transmembrane transport;amino acid transport;betaine transport;carboxylic acid transport;carnitine shuttle;carnitine transport;cation transport;cellular lipid metabolic process;cellular metabolic process;cellular process;establishment of localization;establishment of localization in cell;fatty acid transport;intracellular lipid transport;intracellular transport;ion tran…		cell part;cytoplasm;cytoplasmic part;integral to membrane;intracellular membrane-bounded organelle;intracellular organelle;intracellular organelle part;intracellular part;intrinsic to membrane;membrane;membrane part;membrane-bounded organelle;mitochondrial inner membrane;mitochondrial membrane;mitochondrial part;mitochondrion;organelle;organelle inner membrane;organelle membrane;organelle part		+	17	17	17	71.1	71.1	71.1	32.943	0	129.95	13343000000	11447000000	1895800000	0.00383464
0.112138	-0.781024	-1.58709	-1.63545	0.155457	-1.36171	-0.270975	-0.326154	-1.34048	-1.23139	-1.37865	-0.472094	-1.59965	-1.64839	0.170403	-1.37249	-0.273119	-1.35109	-1.24113	-0.690186	-0.528299	-1.13359	-1.37779	-1.60519	-0.928268	-1.53834	-0.488119	-1.63859	-1.68852	-1.4059	-0.279768	-1.42339	amine metabolic process;amino acid activation;asparaginyl-tRNA aminoacylation;carboxylic acid metabolic process;cellular amine metabolic process;cellular amino acid metabolic process;cellular ketone metabolic process;cellular macromolecule metabolic process;cellular metabolic process;cellular nitrogen compound metabolic process;cellular process;gene expression;macromolecule metabolic process;meta…	adenyl nucleotide binding;adenyl ribonucleotide binding;aminoacyl-tRNA ligase activity;asparagine-tRNA ligase activity;ATP binding;binding;catalytic activity;ligase activity;ligase activity, forming aminoacyl-tRNA and related compounds;ligase activity, forming carbon-oxygen bonds;nucleic acid binding;nucleotide binding;purine nucleotide binding;purine ribonucleoside triphosphate binding;purine ri…	cell part;cytoplasm;cytoplasmic part;cytosol;extracellular membrane-bounded organelle;extracellular organelle;extracellular region part;extracellular vesicular exosome;intracellular membrane-bounded organelle;intracellular organelle;intracellular part;membrane-bounded organelle;membrane-bounded vesicle;mitochondrion;organelle;vesicle	Aminoacyl-tRNA biosynthesis		30	30	29	50.7	50.7	49.3	62.942	0	323.31	24374000000	12976000000	11399000000	0.157979
-0.129841	-0.40197	-0.926725	NaN	0.264004	NaN	0.171781	0.194262	NaN	-0.121966	-0.383956	-1.22496	-0.934059	NaN	0.289385	NaN	0.188296	NaN	-0.122931	-0.431491	-0.772411	-0.70693	-1.21761	NaN	-0.285445	NaN	-0.26525	-0.956798	NaN	NaN	0.192023	-0.396416	cell cycle;cell cycle process;cellular component movement;cellular component organization;cellular component organization at cellular level;cellular component organization or biogenesis;cellular component organization or biogenesis at cellular level;cellular localization;cellular macromolecule localization;cellular membrane organization;cellular process;cellular protein localization;ciliary recep…		cell part;centrosome;cytoplasmic part;cytoskeletal part;cytosol;intracellular membrane-bounded organelle;intracellular non-membrane-bounded organelle;intracellular organelle;intracellular organelle part;intracellular part;membrane-bounded organelle;microtubule organizing center;non-membrane-bounded organelle;nucleus;organelle;organelle part			4	4	4	40.3	40.3	40.3	13.596	0	21.305	649650000	372230000	277410000	0.615283
-0.0480423	0.0108052	0.397886	0.373339	-0.540045	0.110326	-0.330692	0.082293	0.306598	0.0520149	0.27285	0.212368	0.436138	0.409232	-0.544319	0.120933	-0.333309	0.336074	0.0570156	0.23753	0.224003	0.73777	0.467624	0.537652	0.414219	0.694207	0.0358711	0.444771	0.417332	0.123327	-0.341423	0.305002	biosynthetic process;cellular biosynthetic process;cellular component assembly;cellular component organization;cellular component organization or biogenesis;cellular macromolecule biosynthetic process;cellular macromolecule metabolic process;cellular metabolic process;cellular nitrogen compound metabolic process;cellular process;gene expression;macromolecular complex assembly;macromolecular compl…	AU-rich element binding;binding;catalytic activity;enzyme binding;histone deacetylase binding;hydrolase activity;identical protein binding;mRNA binding;nucleic acid binding;protein binding;protein dimerization activity;protein homodimerization activity;RNA binding	cell part;centrosome;cytoplasmic part;cytoskeletal part;intracellular membrane-bounded organelle;intracellular non-membrane-bounded organelle;intracellular organelle;intracellular organelle part;intracellular part;macromolecular complex;membrane-bounded organelle;microtubule organizing center;mRNA cleavage factor complex;non-membrane-bounded organelle;nuclear body;nuclear part;nucleoplasm;nucleop…	mRNA surveillance pathway		19	19	19	76.7	76.7	76.7	26.227	0	301.37	45416000000	29415000000	16001000000	0.0790287
1.05014	1.18782	-0.818686	-0.628275	0.572841	-1.03764	0.64733	1.17118	-0.368704	-0.931885	-0.464359	1.27512	-0.825165	-0.633247	0.627914	-1.04585	0.709564	-0.371622	-0.93926	1.2666	0.802572	1.02872	1.22927	-0.483946	0.432701	-0.541833	1.49323	-0.845253	-0.648663	-1.07132	0.723609	-0.479428	biological regulation;cell surface receptor linked signaling pathway;cellular process;cellular response to stimulus;G-protein coupled receptor protein signaling pathway;regulation of biological process;regulation of cellular process;response to stimulus;signal transduction	amine binding;amino acid binding;binding;carboxylic acid binding;catalytic activity;cation binding;glutathione binding;G-protein coupled receptor activity;ion binding;lipoprotein particle receptor binding;low-density lipoprotein particle receptor binding;metal ion binding;modified amino acid binding;molecular transducer activity;peptide binding;protein binding;protein domain specific binding;rece…	cell part;cytoplasm;extracellular membrane-bounded organelle;extracellular organelle;extracellular region part;extracellular vesicular exosome;integral to membrane;integral to plasma membrane;intracellular membrane-bounded organelle;intracellular organelle;intracellular part;intrinsic to membrane;intrinsic to plasma membrane;membrane part;membrane-bounded organelle;membrane-bounded vesicle;nucleu…		+	14	14	14	45.6	45.6	45.6	45.283	0	93.148	3821200000	2829900000	991310000	0.0250874
1.05245	1.21841	0.694636	1.19609	1.07464	1.57658	0.943566	0.993631	0.728125	1.25188	1.45528	0.812806	0.761418	1.31109	1.17795	1.72815	1.03428	0.798128	1.37224	1.34253	0.848828	1.03587	1.12281	0.872037	0.998611	0.878989	0.896922	0.77649	1.33704	1.76235	1.05475	1.62677	anatomical structure development;behavior;biological regulation;cell junction assembly;cell junction organization;cell projection organization;cell surface receptor linked signaling pathway;cell-cell junction assembly;cell-cell junction organization;cellular component assembly;cellular component assembly at cellular level;cellular component organization;cellular component organization at cellular…	armadillo repeat domain binding;binding;calmodulin binding;enzyme binding;estrogen receptor binding;hormone receptor binding;nuclear hormone receptor binding;phosphatase binding;protein binding;protein complex binding;protein domain specific binding;protein phosphatase 2A binding;protein phosphatase binding;receptor binding;steroid hormone receptor binding	cell body;cell junction;cell part;cell projection;cell projection part;cell-cell junction;cytoplasm;cytoskeletal part;dendritic spine;intracellular organelle part;intracellular part;membrane;neuron projection;neuron spine;neuronal cell body;occluding junction;organelle part;postsynaptic density;postsynaptic membrane;synapse part;synaptic membrane;tight junction			28	28	26	51.9	51.9	50.6	86.131	0	323.31	7274500000	5599500000	1674900000	0.186782
-0.933619	-0.535195	0.548673	-0.322385	-1.33064	-0.427891	-1.30842	-0.487453	-0.483701	-0.415341	-0.202624	-0.544952	0.601423	-0.324937	-1.34117	-0.431278	-1.31877	-0.487529	-0.418628	-0.237525	-0.476567	-0.0232327	-0.268079	0.491826	0.0579991	-0.00312236	-0.291708	0.613327	-0.332847	-0.441777	-1.35088	-0.2092	cellular macromolecule metabolic process;cellular metabolic process;cellular nitrogen compound metabolic process;cellular process;macromolecule metabolic process;metabolic process;ncRNA metabolic process;ncRNA processing;nitrogen compound metabolic process;nucleic acid metabolic process;nucleobase-containing compound metabolic process;primary metabolic process;RNA metabolic process;RNA processing…	binding;nucleic acid binding;RNA binding;snoRNA binding	box C/D snoRNP complex;cell part;intracellular membrane-bounded organelle;intracellular non-membrane-bounded organelle;intracellular organelle;intracellular organelle part;intracellular part;macromolecular complex;membrane-bounded organelle;non-membrane-bounded organelle;nuclear part;nucleolar part;nucleolus;nucleus;organelle;organelle part;preribosome;ribonucleoprotein complex;small nucleolar ri…			18	18	18	51.4	51.4	51.4	51.84	0	315.17	8350400000	4735500000	3615000000	0.243762
-0.444122	-0.363982	-0.0566188	-0.0717699	-0.774388	-0.409683	-0.953695	-0.489748	-0.55994	-0.564736	-0.307741	-0.524697	-0.0570669	-0.0723379	-0.780517	-0.412925	-0.961243	-0.564371	-0.569206	-0.259413	-0.646287	0.251927	-0.0586718	-0.103517	-0.480704	-0.0151324	-0.529619	-0.0584562	-0.0740989	-0.422978	-0.984644	-0.317728	biological regulation;cell cycle phase;cell cycle process;cellular component organization;cellular component organization at cellular level;cellular component organization or biogenesis;cellular component organization or biogenesis at cellular level;cellular macromolecule metabolic process;cellular metabolic process;cellular nitrogen compound metabolic process;cellular process;cellular response t…	binding;cation binding;DNA binding;double-stranded DNA binding;ion binding;metal ion binding;nucleic acid binding;structure-specific DNA binding;transition metal ion binding;zinc ion binding	cell part;chromosome;condensed chromosome;cytoplasmic part;female pronucleus;Golgi apparatus;intracellular membrane-bounded organelle;intracellular non-membrane-bounded organelle;intracellular organelle;intracellular organelle part;intracellular part;membrane;membrane-bounded organelle;mitochondrion;non-membrane-bounded organelle;nuclear matrix;nuclear part;nucleoplasm;nucleus;organelle;organelle…			18	18	18	36	36	36	76.107	0	299.19	2263600000	1225500000	1038100000	0.356717
0.11324	-0.110206	0.82051	0.657097	0.262601	0.321912	-0.144795	0.667824	0.129437	0.553265	0.534134	-0.178843	0.899394	0.720271	0.287847	0.352861	-0.145941	0.141881	0.606455	0.956703	0.17942	0.170628	0.409887	0.705238	0.732912	0.261067	0.252147	0.917196	0.734528	0.359845	-0.149494	0.597075	2-oxoglutarate metabolic process;acetyl-CoA catabolic process;acetyl-CoA metabolic process;carboxylic acid metabolic process;catabolic process;cellular catabolic process;cellular ketone metabolic process;cellular metabolic process;cellular nitrogen compound metabolic process;cellular process;coenzyme catabolic process;coenzyme metabolic process;cofactor catabolic process;cofactor metabolic proces…	binding;catalytic activity;cation binding;coenzyme binding;cofactor binding;electron carrier activity;ion binding;isocitrate dehydrogenase (NAD+) activity;isocitrate dehydrogenase activity;magnesium ion binding;metal ion binding;NAD binding;nucleotide binding;oxidoreductase activity;oxidoreductase activity, acting on CH-OH group of donors;oxidoreductase activity, acting on the CH-OH group of dono…	cell part;cytoplasmic part;intracellular membrane-bounded organelle;intracellular organelle;intracellular organelle lumen;intracellular organelle part;intracellular part;membrane-bounded organelle;membrane-enclosed lumen;mitochondrial matrix;mitochondrial part;mitochondrion;nucleus;organelle;organelle lumen;organelle part	Citrate cycle (TCA cycle)		20	20	12	54.8	54.8	33	42.183	0	206.05	12179000000	8281000000	3897700000	0.37491
-0.909112	-0.836804	-1.41268	-1.74289	-0.579126	-1.22287	-0.856093	-1.21432	-1.6115	-1.70379	-1.75485	-1.0122	-1.42386	-1.75668	-0.58371	-1.23255	-0.862868	-1.62425	-1.71728	-1.22139	-1.41321	-1.61523	-1.73754	-1.93912	-1.54855	-1.23368	-0.911745	-1.45852	-1.79945	-1.26256	-0.883875	-1.81179	biological regulation;cell migration;cell motility;cell proliferation;cellular component movement;cellular component organization;cellular component organization or biogenesis;cellular process;locomotion;macromolecule metabolic process;metabolic process;neuromuscular junction development;positive regulation of biological process;positive regulation of catabolic process;positive regulation of cell…	binding;catalytic activity;cation binding;endopeptidase activity;epidermal growth factor binding;growth factor binding;hormone binding;hydrolase activity;ion binding;metal ion binding;metalloendopeptidase activity;metallopeptidase activity;peptidase activity;peptidase activity, acting on L-amino acid peptides;protein binding	cell part;cell surface;cytoplasmic part;cytosol;intracellular part			23	23	23	22.3	22.3	22.3	131.57	0	75.372	4811100000	2275300000	2535800000	0.152611
-0.836736	0.396594	-0.46515	-0.732862	-1.46351	-3.70604	-2.30356	-0.949218	-1.90192	-1.75529	-1.91469	-1.47923	-0.468831	-0.738662	-1.47509	-3.73537	-2.32179	-1.91697	-1.76918	-0.676047	-1.40327	-0.585951	-0.698099	-1.40093	-0.970683	-1.05939	-1.24685	-0.480244	-0.756645	-3.82631	-2.37832	-1.97682	biological regulation;blood coagulation;cell activation;cellular process;coagulation;establishment of localization;establishment of localization in cell;exocytosis;hemostasis;multicellular organismal process;platelet activation;platelet degranulation;regulation of biological quality;regulation of body fluid levels;secretion;secretion by cell;transport;vesicle-mediated transport	binding;calcium ion binding;cation binding;ion binding;metal ion binding	cell part;cytoplasmic membrane-bounded vesicle;cytoplasmic part;cytoplasmic vesicle;endoplasmic reticulum;endoplasmic reticulum lumen;endoplasmic reticulum part;extracellular region;Golgi apparatus;intracellular membrane-bounded organelle;intracellular organelle;intracellular organelle lumen;intracellular organelle part;intracellular part;melanosome;membrane;membrane-bounded organelle;membrane-bo…			16	16	3	67.3	67.3	13.7	37.106	0	234.1	7120500000	3338500000	3782000000	0.298743
0.413773	0.447702	-0.311919	-0.140575	0.823905	-0.100968	0.517665	0.246257	-0.0626476	0.170394	0.108502	0.269736	-0.314388	-0.141688	0.903115	-0.101767	0.567433	-0.0631434	0.186776	-0.208645	0.195859	-0.44263	-0.643107	0.0142871	-0.351216	-0.805267	0.556645	-0.322041	-0.145137	-0.104244	0.578665	0.121287	amine metabolic process;biological regulation;carboxylic acid metabolic process;cellular amine metabolic process;cellular amino acid metabolic process;cellular ketone metabolic process;cellular macromolecule metabolic process;cellular metabolic process;cellular modified amino acid metabolic process;cellular nitrogen compound metabolic process;cellular process;coenzyme metabolic process;cofactor m…	catalytic activity;hydrolase activity	cell part;cytoplasmic part;cytosol;endoplasmic reticulum;extracellular membrane-bounded organelle;extracellular organelle;extracellular region part;extracellular vesicular exosome;intracellular membrane-bounded organelle;intracellular organelle;intracellular part;membrane-bounded organelle;membrane-bounded vesicle;organelle;vesicle	Cysteine and methionine metabolism		22	22	11	53	53	34.5	58.951	0	211.79	6939700000	4435400000	2504300000	0.0799808
-0.79225	-0.463621	0.00748038	-0.25378	-1.04485	-0.299789	-0.898292	-0.262435	-0.214384	-0.637736	0.0937651	-0.504052	0.00819954	-0.255789	-1.05312	-0.302161	-0.905401	-0.21608	-0.642783	0.242708	-0.240965	0.606529	0.389585	0.0801993	0.19464	0.226285	-0.191454	0.00836184	-0.262016	-0.309518	-0.927443	0.104814	biosynthetic process;cell cycle;cell cycle process;cellular biosynthetic process;cellular macromolecule biosynthetic process;cellular macromolecule metabolic process;cellular metabolic process;cellular nitrogen compound metabolic process;cellular process;DNA metabolic process;DNA replication;DNA-dependent DNA replication initiation;G1/S transition of mitotic cell cycle;macromolecule biosynthetic …	adenyl nucleotide binding;adenyl ribonucleotide binding;ATP binding;binding;DNA binding;DNA replication origin binding;nucleic acid binding;nucleotide binding;purine nucleotide binding;purine ribonucleoside triphosphate binding;purine ribonucleotide binding;ribonucleotide binding;sequence-specific DNA binding	cell part;chromosomal part;cytoplasm;intracellular membrane-bounded organelle;intracellular organelle;intracellular organelle part;intracellular part;macromolecular complex;membrane-bounded organelle;nuclear chromosome part;nuclear origin of replication recognition complex;nuclear part;nucleoplasm;nucleus;organelle;organelle part;origin recognition complex;protein complex	Cell cycle;Cell cycle - yeast;Meiosis - yeast	+	12	12	12	36.8	36.8	36.8	50.282	0	53.814	1716000000	1001400000	714610000	0.00260089
1.72609	-0.195631	0.226436	1.60889	1.5273	1.50982	1.54681	1.46492	0.394806	2.04933	1.3631	-0.745804	0.248206	1.76357	1.67413	1.65498	1.69552	0.432762	2.24635	0.609186	1.12453	-1.86705	-1.14412	-0.433124	0.648706	-1.12357	-1.13217	0.253119	1.79848	1.68773	1.72908	1.52373	axon guidance;biological regulation;cell activation;cell activation involved in immune response;cell surface receptor linked signaling pathway;cellular defense response;cellular process;cellular response to stimulus;chemotaxis;defense response;immune effector process;immune response;immune system process;innate immune response;integrin-mediated signaling pathway;intracellular signal transduction;…	binding;identical protein binding;molecular transducer activity;protein binding;receptor binding;receptor signaling protein activity;signal transducer activity	cell part;cell surface;integral to membrane;integral to plasma membrane;intrinsic to membrane;intrinsic to plasma membrane;membrane;membrane part;plasma membrane;plasma membrane part	Natural killer cell mediated cytotoxicity;Osteoclast differentiation	+	2	2	2	29.4	29.4	29.4	11.043	0	120.05	3421600000	2741100000	680550000	0.00227909
0.398553	0.39963	0.594728	0.725612	0.275446	0.911136	0.183746	0.34548	0.796057	0.662282	0.610071	0.318682	0.651905	0.795372	0.301928	0.998733	0.201411	0.87259	0.725954	0.788981	0.158865	0.683759	0.946136	0.718209	0.798066	0.704283	0.533964	0.664809	0.811116	1.0185	0.205398	0.68196	cellular component assembly;cellular component assembly at cellular level;cellular component biogenesis;cellular component organization;cellular component organization at cellular level;cellular component organization or biogenesis;cellular component organization or biogenesis at cellular level;cellular macromolecular complex assembly;cellular macromolecular complex subunit organization;cellular …	catalytic activity;NADH dehydrogenase (quinone) activity;NADH dehydrogenase (ubiquinone) activity;NADH dehydrogenase activity;oxidoreductase activity;oxidoreductase activity, acting on NADH or NADPH;oxidoreductase activity, acting on NADH or NADPH, quinone or similar compound as acceptor	cell part;cytoplasmic part;intracellular membrane-bounded organelle;intracellular organelle;intracellular organelle part;intracellular part;macromolecular complex;membrane;membrane part;membrane-bounded organelle;membrane-enclosed lumen;mitochondrial inner membrane;mitochondrial intermembrane space;mitochondrial membrane;mitochondrial membrane part;mitochondrial part;mitochondrial respiratory cha…	Alzheimer's disease;Huntington's disease;Oxidative phosphorylation;Parkinson's disease		7	7	7	60.4	60.4	60.4	12.517	0	43.291	6791700000	4865400000	1926300000	0.213843
-0.582218	-0.568859	0.0178974	-0.323105	-0.850364	-0.273844	-0.699548	-0.354752	0.0903797	-0.417872	0.0309878	-0.0299297	0.0196181	-0.325662	-0.857093	-0.276011	-0.705084	0.0990689	-0.421179	0.187625	-0.439177	0.337943	0.429107	-0.169678	0.164705	0.145294	0.0014363	0.0200064	-0.33359	-0.28273	-0.72225	0.0346393	biosynthetic process;cell cycle;cell cycle process;cellular biosynthetic process;cellular macromolecule biosynthetic process;cellular macromolecule metabolic process;cellular metabolic process;cellular nitrogen compound metabolic process;cellular process;DNA metabolic process;DNA replication;DNA-dependent DNA replication initiation;G1/S transition of mitotic cell cycle;macromolecule biosynthetic …	adenyl nucleotide binding;adenyl ribonucleotide binding;ATP binding;binding;DNA binding;DNA replication origin binding;nucleic acid binding;nucleotide binding;purine nucleotide binding;purine ribonucleoside triphosphate binding;purine ribonucleotide binding;ribonucleotide binding;sequence-specific DNA binding	actin cytoskeleton;cell part;chromosomal part;cytoplasm;cytoskeleton;intracellular membrane-bounded organelle;intracellular non-membrane-bounded organelle;intracellular organelle;intracellular organelle part;intracellular part;macromolecular complex;membrane-bounded organelle;non-membrane-bounded organelle;nuclear chromosome part;nuclear origin of replication recognition complex;nuclear part;nucl…	Cell cycle;Cell cycle - yeast;Meiosis - yeast	+	13	13	13	42.7	42.7	42.7	50.377	0	148.01	2253000000	729290000	1523700000	0.0442055
0.3503	0.104498	0.117308	0.623044	0.151898	0.541544	0.235962	0.705271	0.651257	0.462396	0.537545	0.387135	0.128586	0.682944	0.166501	0.593608	0.258647	0.713869	0.50685	0.718188	0.518576	0.905849	-0.225068	0.843912	0.931552	0.813273	0.139956	0.131131	0.696462	0.605357	0.263767	0.600887	apoptosis;biological regulation;cell cycle;cell cycle phase;cell cycle process;cell death;cell division;cellular component organization;cellular component organization at cellular level;cellular component organization or biogenesis;cellular component organization or biogenesis at cellular level;cellular localization;cellular macromolecule localization;cellular macromolecule metabolic process;cell…		cell part;chromatin;chromosomal part;chromosome;chromosome, centromeric region;cohesin complex;cytoplasmic part;cytosol;intracellular non-membrane-bounded organelle;intracellular organelle;intracellular organelle part;intracellular part;macromolecular complex;meiotic cohesin complex;membrane;non-membrane-bounded organelle;nuclear chromosome part;nuclear cohesin complex;nuclear meiotic cohesin com…	Cell cycle;Cell cycle - yeast		28	28	25	56.1	56.1	53.1	71.689	0	323.31	17739000000	12175000000	5564100000	0.648926
-0.133964	-0.0524323	0.582393	0.514889	-0.227641	-0.308432	-0.520471	0.18757	0.444244	0.252645	0	0.293739	0.638385	0.564391	-0.229443	-0.310873	-0.52459	0.486954	0.276934	0.538566	0.581138	0.652333	0.537951	0.670845	-0.234368	0.341037	0.182887	0.651021	0.575562	-0.318441	-0.537361	0	anatomical structure development;cellular macromolecule metabolic process;cellular metabolic process;cellular process;cellular protein metabolic process;chaperone-mediated protein transport;developmental process;establishment of localization;establishment of localization in cell;establishment of protein localization;establishment of protein localization in mitochondrion;establishment of protein l…	binding;cation binding;ion binding;metal ion binding	cell part;cytoplasmic part;intracellular membrane-bounded organelle;intracellular organelle;intracellular organelle part;intracellular part;membrane;membrane-bounded organelle;membrane-enclosed lumen;mitochondrial inner membrane;mitochondrial intermembrane space;mitochondrial membrane;mitochondrial part;mitochondrion;organelle;organelle envelope lumen;organelle inner membrane;organelle membrane;o…			5	5	5	79.4	79.4	79.4	10.998	0	140.01	4464300000	2701500000	1762700000	0.37024
-0.470056	-0.395127	0.147147	-0.106537	-0.603423	0.15681	-0.610382	-0.298196	-0.368627	-0.105379	-0.0271789	-0.500654	0.161294	-0.10738	-0.608198	0.171886	-0.615213	-0.371544	-0.106213	-0.0381701	-0.432395	0.116054	-0.122256	0.128068	0.19208	0.223668	-0.557573	0.164487	-0.109994	0.175288	-0.63019	-0.0280609	cellular macromolecule metabolic process;cellular metabolic process;cellular nitrogen compound metabolic process;cellular process;macromolecule metabolic process;metabolic process;mRNA metabolic process;mRNA processing;nitrogen compound metabolic process;nuclear mRNA splicing, via spliceosome;nucleic acid metabolic process;nucleobase-containing compound metabolic process;primary metabolic process…	adenyl nucleotide binding;adenyl ribonucleotide binding;ATP binding;ATPase activity;ATPase activity, coupled;ATP-dependent helicase activity;ATP-dependent RNA helicase activity;binding;catalytic activity;helicase activity;hydrolase activity;hydrolase activity, acting on acid anhydrides;hydrolase activity, acting on acid anhydrides, in phosphorus-containing anhydrides;nucleoside-triphosphatase act…	cell part;cytoplasm;intracellular membrane-bounded organelle;intracellular organelle;intracellular organelle part;intracellular part;macromolecular complex;membrane-bounded organelle;nuclear part;nucleoplasm;nucleus;organelle;organelle part;ribonucleoprotein complex;spliceosomal complex	Spliceosome		34	33	33	40.9	40.1	40.1	119.26	0	284.68	5330700000	3128100000	2202700000	0.179334
1.569	0.354213	-0.982715	-1.06836	1.46041	-0.271604	1.30604	1.39818	0.162121	-0.0229783	-0.563846	1.19954	-0.990493	-1.07682	1.60081	-0.273753	1.4316	0.177707	-0.0231601	0.84171	1.01924	-0.200941	0.108236	-0.0509172	0.498311	-1.55821	0.452344	-1.01461	-1.10303	-0.280417	1.45994	-0.582143	biological regulation;cellular macromolecule metabolic process;cellular metabolic process;cellular process;cellular protein metabolic process;macromolecule metabolic process;macromolecule modification;metabolic process;negative regulation of actin nucleation;negative regulation of Arp2/3 complex-mediated actin nucleation;negative regulation of biological process;negative regulation of catalytic a…	enzyme activator activity;enzyme inhibitor activity;enzyme regulator activity;kinase inhibitor activity;kinase regulator activity;protein kinase inhibitor activity;protein kinase regulator activity	cell part;intracellular			12	12	10	78.9	78.9	53.5	16.801	0	323.31	41670000000	30368000000	11302000000	0.226264
0.405693	-0.122038	0.736817	0.28796	-0.0404147	0.673532	-0.00196881	-0.120016	0.242553	0.578493	0.676289	0.175398	0.807654	0.315645	-0.0407345	0.738286	-0.00198439	0.265872	0.634109	0.449577	0.316019	0.927152	0.720698	0.724537	0.599924	0.852	0.365362	0.823641	0.321893	0.752899	-0.0020327	0.755981	androgen receptor signaling pathway;biological regulation;biosynthetic process;cellular biosynthetic process;cellular macromolecule metabolic process;cellular metabolic process;cellular nitrogen compound metabolic process;cellular process;cellular response to stimulus;developmental process;gene expression;intracellular receptor mediated signaling pathway;macromolecule metabolic process;metabolic …	binding;hormone receptor binding;ligand-dependent nuclear receptor transcription coactivator activity;nuclear hormone receptor binding;protein binding;protein binding transcription factor activity;receptor activity;receptor binding;RNA polymerase II transcription cofactor activity;RNA polymerase II transcription factor binding transcription factor activity;thyroid hormone receptor binding;transcr…	cell part;intracellular membrane-bounded organelle;intracellular organelle;intracellular organelle part;intracellular part;macromolecular complex;mediator complex;membrane;membrane-bounded organelle;nuclear part;nucleoplasm;nucleoplasm part;nucleus;organelle;organelle part;protein complex		+	20	20	19	19.3	19.3	18.9	160.6	0	239.7	3476700000	2628400000	848270000	0.0216996
0.180059	0.781894	-0.65226	-0.420881	0.85973	-0.375359	0.437251	0.141891	0.499758	-0.409574	-0.192277	0.718676	-0.657422	-0.424212	0.942384	-0.378329	0.479289	0.547805	-0.412815	0.0498774	0.53598	-0.0280408	-0.373051	-0.34455	-0.121383	-0.850955	0.555752	-0.673427	-0.43454	-0.38754	0.488776	-0.198516	anatomical structure development;biological regulation;biosynthetic process;bone development;cellular biosynthetic process;cellular metabolic process;cellular nitrogen compound biosynthetic process;cellular nitrogen compound metabolic process;cellular process;developmental process;metabolic process;negative regulation of catalytic activity;negative regulation of molecular function;nitrogen compou…	binding;catalytic activity;cation binding;diphosphotransferase activity;enzyme inhibitor activity;enzyme regulator activity;ion binding;magnesium ion binding;metal ion binding;ribose phosphate diphosphokinase activity;transferase activity;transferase activity, transferring phosphorus-containing groups	macromolecular complex;protein complex;ribose phosphate diphosphokinase complex			15	15	14	60.7	60.7	56.9	40.925	0	154.36	5670200000	3772400000	1897800000	0.14209
-0.629301	-0.593671	0.0563682	-0.0405338	-0.748169	-0.0162242	-0.739049	-0.330875	-0.0764642	-0.172114	-0.114773	-0.315347	0.0617875	-0.0408545	-0.75409	-0.0163526	-0.744898	-0.0770694	-0.173476	-0.285728	-0.316136	0.311614	-0.0269375	0.0218657	0.00501534	0.385701	-0.554339	0.0630105	-0.0418491	-0.0167507	-0.763033	-0.118497	ATP-dependent chromatin remodeling;biological regulation;biosynthetic process;cellular biosynthetic process;cellular component assembly;cellular component assembly at cellular level;cellular component organization;cellular component organization at cellular level;cellular component organization or biogenesis;cellular component organization or biogenesis at cellular level;cellular macromolecular c…	adenyl nucleotide binding;adenyl ribonucleotide binding;ATP binding;ATPase activity;binding;catalytic activity;chromatin binding;DNA binding;helicase activity;hydrolase activity;hydrolase activity, acting on acid anhydrides;hydrolase activity, acting on acid anhydrides, in phosphorus-containing anhydrides;nucleic acid binding;nucleoside-triphosphatase activity;nucleotide binding;purine nucleotide…	cell part;chromatin remodeling complex;chromatin silencing complex;chromosome;condensed chromosome;intracellular membrane-bounded organelle;intracellular non-membrane-bounded organelle;intracellular organelle;intracellular organelle part;intracellular part;ISWI complex;macromolecular complex;membrane-bounded organelle;non-membrane-bounded organelle;nuclear part;nucleolus;nucleoplasm;nucleus;NURF …			67	67	67	61.5	61.5	61.5	121.9	0	323.31	43951000000	26469000000	17482000000	0.257465
-0.00908352	-0.780905	-1.33833	-1.32394	-0.0901442	-0.523704	0.143777	-0.452368	-0.691575	-0.949987	-0.926894	-0.694837	-1.34892	-1.33442	-0.0908576	-0.527848	0.157599	-0.697048	-0.957505	-0.634645	-0.66417	-1.63508	-1.05168	-1.48396	-0.880625	-0.116077	-0.0729728	-1.38176	-1.36691	-0.540699	0.160719	-0.956973	activation of JUN kinase activity;activation of MAPK activity;biological regulation;cell differentiation;cellular component assembly;cellular component organization;cellular component organization or biogenesis;cellular developmental process;cellular macromolecule metabolic process;cellular metabolic process;cellular process;cellular protein metabolic process;developmental process;endosome transp…	binding;binding, bridging;cytoskeletal protein binding;enzyme binding;JUN kinase binding;kinase binding;kinesin binding;MAP-kinase scaffold activity;protein binding;protein complex scaffold;protein kinase binding;receptor signaling complex scaffold activity;signaling adaptor activity;structural molecule activity	acrosomal vesicle;cell part;cytoplasm;cytoplasmic membrane-bounded vesicle;cytoplasmic part;cytoplasmic vesicle;cytosol;extracellular membrane-bounded organelle;extracellular organelle;extracellular region part;extracellular vesicular exosome;integral to membrane;intracellular membrane-bounded organelle;intracellular organelle;intracellular part;intrinsic to membrane;membrane part;membrane-bounde…			28	28	26	31.7	31.7	30.2	144.68	0	297.45	2513900000	1389500000	1124400000	0.647302
-0.834915	-0.747174	0.649619	0.0634322	-1.53001	-0.5613	-1.33407	-0.64324	-0.586431	-0.435122	-0.132285	-0.769089	0.712074	0.0695305	-1.54212	-0.565742	-1.34463	-0.591072	-0.438565	-0.234731	-0.296343	0.340828	0.44349	0.253342	0.183416	0.337222	0.0449226	0.726168	0.0709068	-0.579515	-1.37736	-0.136578			cell part;intracellular non-membrane-bounded organelle;intracellular organelle;intracellular organelle part;intracellular part;non-membrane-bounded organelle;nuclear part;nucleolus;organelle;organelle part		+	42	42	42	25.8	25.8	25.8	254.39	0	259.08	12515000000	2569500000	9945800000	0.0394053
-0.458644	-0.317479	0.0600035	0.0922531	-0.517286	0.0884312	-0.551433	-0.211834	-0.0216187	-0.0590491	-0.361254	-5.99e-05	0.0657723	0.101122	-0.52138	0.096933	-0.555797	-0.0217898	-0.0595164	-0.141468	-0.0342419	0.159532	0.140392	0.38091	0.0732898	0.300499	-0.543343	0.0670742	0.103124	0.0988517	-0.569328	-0.372977	cellular macromolecule metabolic process;cellular metabolic process;cellular nitrogen compound metabolic process;cellular process;macromolecule metabolic process;metabolic process;mRNA metabolic process;mRNA processing;nitrogen compound metabolic process;nuclear mRNA splicing, via spliceosome;nucleic acid metabolic process;nucleobase-containing compound metabolic process;primary metabolic process…		catalytic step 2 spliceosome;cell part;intracellular membrane-bounded organelle;intracellular organelle;intracellular organelle part;intracellular part;macromolecular complex;membrane;membrane-bounded organelle;nuclear part;nucleoplasm;nucleus;organelle;organelle part;ribonucleoprotein complex;spliceosomal complex	Spliceosome		46	46	44	41.6	41.6	40.7	171.29	0	323.31	13713000000	8059700000	5653100000	0.325488
0.0216003	0.565687	0.919473	0.738504	-0.294409	-0.131446	-0.152758	0.401472	0.525094	0.397913	0.251948	0.206605	1.00787	0.809504	-0.296739	-0.132486	-0.153967	0.575577	0.436168	0.438849	0.453087	0.642233	0.908825	0.741262	0.496368	0.520913	0.433663	1.02782	0.825527	-0.135711	-0.157716	0.281637	aging;anatomical structure formation involved in morphogenesis;apoptosis;axon cargo transport;axon transport of mitochondrion;biological regulation;cell aging;cell death;cellular component movement;cellular component organization;cellular component organization at cellular level;cellular component organization or biogenesis;cellular component organization or biogenesis at cellular level;cellular …	binding;catalytic activity;cation binding;GTP binding;GTPase activity;guanyl nucleotide binding;guanyl ribonucleotide binding;hydrolase activity;hydrolase activity, acting on acid anhydrides;hydrolase activity, acting on acid anhydrides, in phosphorus-containing anhydrides;ion binding;magnesium ion binding;metal ion binding;nucleoside-triphosphatase activity;nucleotide binding;purine nucleotide b…	cell part;cell projection;cytoplasm;cytoplasmic part;dendrite;integral to membrane;intracellular membrane-bounded organelle;intracellular organelle;intracellular organelle part;intracellular part;intrinsic to membrane;membrane;membrane part;membrane-bounded organelle;membrane-enclosed lumen;mitochondrial crista;mitochondrial inner membrane;mitochondrial intermembrane space;mitochondrial membrane;…			50	50	49	61.9	61.9	61.3	115.88	0	323.31	29688000000	20031000000	9657400000	0.461396
-0.236969	-0.76209	-0.550366	-0.126328	-0.307882	0.451736	-0.0816801	-0.430555	-0.833629	0.22352	-0.279508	-1.22652	-0.554721	-0.127328	-0.310318	0.495165	-0.0823265	-0.840226	0.245009	-0.463198	-0.621859	-1.019	-0.46348	-0.90552	-0.847473	-0.012238	-0.997945	-0.568226	-0.130428	0.504967	-0.0843307	-0.288578	ameboidal cell migration;anatomical structure development;anatomical structure formation involved in morphogenesis;anterior/posterior pattern specification;biological regulation;biosynthetic process;cell migration;cell motility;cell proliferation;cell proliferation in forebrain;cellular biosynthetic process;cellular component movement;cellular macromolecule biosynthetic process;cellular macromole…	binding;cation binding;DNA binding;enzyme regulator activity;ion binding;metal ion binding;nucleic acid binding;phosphatase regulator activity	cell part;intracellular membrane-bounded organelle;intracellular organelle;intracellular part;membrane-bounded organelle;nucleus;organelle			35	35	33	40.5	40.5	39.5	133.81	0	273.01	2848000000	1636200000	1211800000	0.0774435
-0.0794644	-0.178806	0.454736	0.369846	-0.305581	0.277253	-0.0148898	0.0372762	0.23891	0.292817	0.538	-0.468186	0.498455	0.405403	-0.308	0.303909	-0.0150076	0.261879	0.320969	0.21821	0.149088	0.405907	0.182775	0.539156	0.411398	0.557	-0.185044	0.508321	0.413428	0.309924	-0.015373	0.601396	biosynthetic process;cellular biosynthetic process;cellular macromolecule biosynthetic process;cellular macromolecule metabolic process;cellular metabolic process;cellular nitrogen compound metabolic process;cellular process;DNA metabolic process;DNA replication;establishment of localization;establishment of localization in cell;establishment of protein localization;establishment of RNA localizat…	binding;catalytic activity;DNA binding;nucleic acid binding;transferase activity;transferase activity, transferring acyl groups	cell part;cytoplasm;cytoplasmic part;cytosol;intracellular membrane-bounded organelle;intracellular organelle;intracellular organelle part;intracellular part;macromolecular complex;membrane;membrane part;membrane-bounded organelle;nuclear membrane;nuclear part;nuclear pore;nucleoplasm;nucleus;organelle;organelle membrane;organelle part;pore complex;protein complex		+	22	22	22	16.6	16.6	16.6	218.4	0	117.42	1445300000	870560000	574790000	0.0403585
-0.678074	-0.445782	-0.0902976	-0.164443	-1.38609	-0.33192	-0.913364	-0.395493	-0.463033	-0.551279	-0.204078	-0.376676	-0.0910122	-0.165744	-1.39706	-0.334546	-0.920592	-0.466697	-0.555641	-0.265864	-0.380437	0.264211	0.0258739	-0.215801	-0.13688	0.301014	-0.294052	-0.0932279	-0.169779	-0.342691	-0.943004	-0.2107	anatomical structure development;biological regulation;biosynthetic process;blood coagulation;cell development;cell differentiation;cell proliferation;cellular biosynthetic process;cellular component organization;cellular component organization at cellular level;cellular component organization or biogenesis;cellular component organization or biogenesis at cellular level;cellular developmental pro…	androgen receptor binding;bHLH transcription factor binding;binding;catalytic activity;chromatin binding;coenzyme binding;cofactor binding;demethylase activity;DNA binding;enzyme binding;flavin adenine dinucleotide binding;histone demethylase activity;histone demethylase activity (H3-dimethyl-K4 specific);histone demethylase activity (H3-K4 specific);histone demethylase activity (H3-K9 specific);…	cell part;chromatin;chromosomal part;intracellular membrane-bounded organelle;intracellular organelle;intracellular organelle part;intracellular part;macromolecular complex;membrane-bounded organelle;nuclear chromatin;nuclear chromosome part;nuclear part;nucleoplasm;nucleoplasm part;nucleus;organelle;organelle part;protein complex;transcription factor complex			44	44	44	74.2	74.2	74.2	92.902	0	323.31	18377000000	10774000000	7602500000	0.0650804
-4.54618	-3.47051	-1.1717	-1.38136	-3.89481	-1.77296	-2.40706	-3.1212	-2.58198	-2.41554	-4.76845	-1.21658	-1.18097	-1.39229	-3.92563	-1.78699	-2.42611	-2.60241	-2.43466	-3.86372	-3.85847	-1.49761	-2.09552	-0.948819	-3.45563	-0.885205	-0.766036	-1.20972	-1.42619	-1.8305	-2.48518	-4.92319	biological regulation;biosynthetic process;carboxylic acid biosynthetic process;carboxylic acid metabolic process;cell communication;cell-cell signaling;cellular biosynthetic process;cellular ketone metabolic process;cellular lipid metabolic process;cellular metabolic process;cellular process;cellular response to external stimulus;cellular response to extracellular stimulus;cellular response to n…	binding;C-5 sterol desaturase activity;catalytic activity;cation binding;heme binding;ion binding;iron ion binding;metal ion binding;oxidoreductase activity;oxidoreductase activity, acting on paired donors, with incorporation or reduction of molecular oxygen;oxidoreductase activity, acting on paired donors, with oxidation of a pair of donors resulting in the reduction of molecular oxygen to two m…	cell part;cytoplasmic part;endoplasmic reticulum membrane;endoplasmic reticulum part;integral to membrane;intracellular membrane-bounded organelle;intracellular organelle;intracellular organelle part;intracellular part;intrinsic to membrane;membrane;membrane part;membrane-bounded organelle;mitochondrion;organelle;organelle membrane;organelle part	Biosynthesis of unsaturated fatty acids		11	11	10	28.4	28.4	27	51.964	0	24.518	1315800000	341380000	974400000	0.748124
1.64959	1.37305	1.95935	1.78166	1.02634	1.52789	1.60926	1.77562	1.71299	1.56183	2.26698	1.60158	2.14773	1.95295	1.12501	1.67478	1.76398	1.87768	1.71199	0.690435	1.43321	0.96596	1.59831	1.45787	1.3785	0.701849	1.24081	2.19024	1.99161	1.70793	1.79889	2.53412	cellular component organization;cellular component organization or biogenesis;cellular membrane organization;cellular process;defense response;endocytosis;establishment of localization;immune response;immune system process;inflammatory response;membrane invagination;membrane organization;response to stimulus;response to stress;response to wounding;transport;vesicle-mediated transport	binding;carbohydrate binding;receptor activity	cell part;extracellular membrane-bounded organelle;extracellular organelle;extracellular region part;extracellular vesicular exosome;integral to membrane;integral to plasma membrane;intrinsic to membrane;intrinsic to plasma membrane;membrane part;membrane-bounded organelle;membrane-bounded vesicle;organelle;plasma membrane part;vesicle		+	40	40	7	30	30	6.5	215.78	0	323.31	7214500000	5787400000	1427100000	0.000423667
-1.27366	-1.2978	-0.683595	-0.438166	-0.538307	-0.661817	-0.71627	-1.23743	-0.860615	-0.273593	-0.667082	-1.58519	-0.689005	-0.441634	-0.542567	-0.667055	-0.721938	-0.867426	-0.275758	-0.774218	-1.22235	-1.69211	-1.54153	-0.906765	-1.21252	-1.03576	-1.29573	-0.705779	-0.452386	-0.683294	-0.739514	-0.68873	acyl-CoA biosynthetic process;acyl-CoA metabolic process;acylglycerol biosynthetic process;acylglycerol metabolic process;anatomical structure development;biological regulation;biosynthetic process;carboxylic acid metabolic process;carboxylic acid transport;cellular biosynthetic process;cellular ketone metabolic process;cellular lipid metabolic process;cellular metabolic process;cellular process;…	acid-thiol ligase activity;adenyl nucleotide binding;adenyl ribonucleotide binding;arachidonate-CoA ligase activity;ATP binding;binding;catalytic activity;fatty acid ligase activity;ligase activity;ligase activity, forming carbon-sulfur bonds;long-chain fatty acid-CoA ligase activity;nucleotide binding;purine nucleotide binding;purine ribonucleoside triphosphate binding;purine ribonucleotide bind…	cell body;cell part;cytoplasm;cytoplasmic part;endoplasmic reticulum membrane;endoplasmic reticulum part;ER-mitochondrion membrane contact site;extracellular membrane-bounded organelle;extracellular organelle;extracellular region part;extracellular vesicular exosome;integral to membrane;intracellular membrane-bounded organelle;intracellular organelle;intracellular organelle part;intracellular par…	Adipocytokine signaling pathway;Fatty acid metabolism;Peroxisome;PPAR signaling pathway	+	32	32	29	63.4	63.4	58.2	74.435	0	323.31	17565000000	7995400000	9569700000	0.00474266
0.0958095	-0.0480738	-0.931805	-0.485986	0.0143992	-0.488698	0.00829558	-0.221571	0	-0.451045	-0.625918	0.0906192	-0.939179	-0.489832	0.0157835	-0.492566	0.00909312	0	-0.454615	-0.713802	-0.409957	-0.972345	-0.935451	-0.66743	-0.878939	-0.601461	-0.48227	-0.962043	-0.501757	-0.504557	0.00927311	-0.64623	biological regulation;biosynthetic process;cation transport;cellular biosynthetic process;cellular component organization;cellular component organization at cellular level;cellular component organization or biogenesis;cellular component organization or biogenesis at cellular level;cellular macromolecule biosynthetic process;cellular macromolecule metabolic process;cellular membrane organization;c…	binding;enzyme binding;lipid binding;phosphatase binding;phosphatidylinositol binding;phosphatidylinositol-3,5-bisphosphate binding;phosphatidylinositol-3-phosphate binding;phosphatidylinositol-4-phosphate binding;phosphatidylinositol-5-phosphate binding;phospholipid binding;protein binding;protein phosphatase binding	cell part;clathrin-coated vesicle;coated vesicle;cytoplasm;cytoplasmic membrane-bounded vesicle;cytoplasmic part;cytoplasmic vesicle;cytosol;early endosome;early endosome membrane;early phagosome;endocytic vesicle;endosomal part;endosome;endosome membrane;extracellular membrane-bounded organelle;extracellular organelle;extracellular region part;extracellular vesicular exosome;extrinsic to membran…		+	14	14	12	78.4	78.4	74.1	18.762	0	65.552	11741000000	6831200000	4909800000	0.00137779
0.620014	0.808761	-0.968101	-0.293607	1.23827	-0.177415	1.01904	0.564485	-0.940744	0.384809	-0.368902	-0.56605	-0.975763	-0.29593	1.35732	-0.178819	1.11701	-0.948188	0.421805	0.392614	0.244187	-1.59303	-1.45082	-0.386957	0.0203608	-1.62392	-0.365488	-0.999518	-0.303135	-0.183172	1.13912	-0.380873	biological regulation;blood coagulation;cell migration;cell motility;cell surface receptor linked signaling pathway;cellular component movement;cellular process;cellular response to stimulus;coagulation;enzyme linked receptor protein signaling pathway;hemostasis;immune system process;intracellular signal transduction;leukocyte migration;locomotion;multicellular organismal process;Ras protein sign…	molecular transducer activity;receptor signaling protein activity;signal transducer activity	cell part;cytoplasmic part;cytosol;intracellular part			13	13	13	51	51	51	45.378	0	198.15	6271600000	3216600000	3055000000	0.288507
-0.162107	-0.429651	0.178502	0.576083	0.490182	0.327752	-0.667108	-0.546008	-0.676864	1.04048	-0.0976937	-0.0161669	0.195663	0.631468	0.537308	0.359263	-0.672387	-0.682221	1.14051	-0.472427	-0.239399	-0.190347	-0.538775	NaN	-0.259819	NaN	-1.49579	0.199536	0.643967	0.366374	-0.688756	-0.100864	biological regulation;cellular component organization;cellular component organization at cellular level;cellular component organization or biogenesis;cellular component organization or biogenesis at cellular level;cellular membrane fusion;cellular membrane organization;cellular process;endosome transport;establishment of localization;establishment of localization in cell;establishment of protein …	binding;protein binding;SNAP receptor activity;SNARE binding;syntaxin binding	cell part;cytoplasmic part;Golgi apparatus part;Golgi membrane;integral to membrane;intracellular organelle part;intracellular part;intrinsic to membrane;macromolecular complex;membrane;membrane part;organelle;organelle membrane;organelle part;perinuclear region of cytoplasm;protein complex;SNARE complex;trans-Golgi network;vesicle	SNARE interactions in vesicular transport		7	7	7	51.8	51.8	51.8	28.114	0	103.95	1785600000	1141200000	644350000	0.145442
0.690885	0.737107	-0.71331	-0.664854	0.766622	-0.432442	0.542963	0.806776	0.153956	-0.55651	-0.436803	0.960594	-0.718956	-0.670115	0.840325	-0.435864	0.595164	0.168757	-0.560914	0.715998	0.366968	0.220963	0.597136	NaN	0.400659	-0.348748	0.571985	-0.736458	-0.686429	-0.446475	0.606945	-0.450978	2'-deoxyribonucleotide metabolic process;aging;alcohol metabolic process;amino sugar metabolic process;biological regulation;carbohydrate metabolic process;catabolic process;cell death;cellular carbohydrate metabolic process;cellular macromolecule metabolic process;cellular metabolic process;cellular nitrogen compound metabolic process;cellular process;cellular protein metabolic process;dATP meta…	acetyltransferase activity;beta-N-acetylglucosaminidase activity;beta-N-acetylhexosaminidase activity;catalytic activity;hexosaminidase activity;histone acetyltransferase activity;hyalurononglucosaminidase activity;hydrolase activity;hydrolase activity, acting on glycosyl bonds;hydrolase activity, hydrolyzing O-glycosyl compounds;lysine N-acetyltransferase activity;N-acetyltransferase activity;N-…	cell part;cytoplasmic part;cytosol;intracellular membrane-bounded organelle;intracellular organelle;intracellular part;membrane;membrane-bounded organelle;nucleus;organelle		+	18	18	18	33.3	33.3	33.3	96.931	0	118.59	2261000000	1560000000	700930000	0.0358732
-0.787265	-0.913807	-0.320944	-0.794946	-0.972688	-1.04427	-1.08427	-0.772915	-0.782346	-1.1006	-0.647709	-0.734882	-0.323483	-0.801237	-0.980385	-1.05253	-1.09285	-0.788538	-1.10931	-0.880803	-0.810467	-0.358988	-0.636739	-0.595676	-0.715713	-0.52411	-0.930286	-0.331359	-0.820743	-1.07816	-1.11945	-0.668728	biological regulation;cell differentiation;cellular developmental process;cellular macromolecule metabolic process;cellular metabolic process;cellular nitrogen compound metabolic process;cellular process;cellular response to chemical stimulus;cellular response to cytokine stimulus;cellular response to interferon-gamma;cellular response to organic substance;cellular response to stimulus;CRD-mediat…	binding;mRNA binding;nucleic acid binding;nucleotide binding;poly(A) RNA binding;poly-purine tract binding;RNA binding;single-stranded RNA binding	catalytic step 2 spliceosome;cell part;CRD-mediated mRNA stability complex;cytoplasmic part;endoplasmic reticulum;histone pre-mRNA 3'end processing complex;intracellular membrane-bounded organelle;intracellular organelle;intracellular organelle part;intracellular part;macromolecular complex;membrane;membrane-bounded organelle;nuclear part;nucleoplasm;nucleus;organelle;organelle part;protein compl…			38	38	2	63.6	63.6	7.2	69.602	0	323.31	200000000000	104000000000	96855000000	0.508946
-0.218055	-0.183125	0.613542	0.377915	-0.116931	0.0619689	-0.411341	-0.144103	0.00124233	0.238004	0.0825078	-0.243499	0.672528	0.414248	-0.117857	0.0679266	-0.414596	0.00136177	0.260885	0.154255	-0.292354	0.416207	0.610096	0.460587	0.253513	0.554546	-0.108698	0.68584	0.422448	0.0692711	-0.424689	0.0922302	biosynthetic process;cellular biosynthetic process;cellular macromolecule biosynthetic process;cellular macromolecule metabolic process;cellular metabolic process;cellular nitrogen compound metabolic process;cellular process;establishment of localization;establishment of localization in cell;establishment of RNA localization;gene expression;intracellular transport;macromolecule biosynthetic proce…		catalytic step 2 spliceosome;cell part;intracellular organelle part;intracellular part;macromolecular complex;nuclear part;nucleoplasm;organelle part;ribonucleoprotein complex;spliceosomal complex	Spliceosome		21	21	21	54.4	54.4	54.4	65.521	0	234.95	5036300000	3108900000	1927400000	0.169724
-0.595363	-0.919595	-0.345908	-0.555395	NaN	-1.31977	NaN	-0.844748	-0.662552	NaN	NaN	NaN	-0.348645	-0.55979	NaN	-1.33021	NaN	-0.667795	NaN	NaN	-1.14173	-0.321269	NaN	0.138704	NaN	0.186748	-1.38191	-0.357133	-0.573418	-1.36259	NaN	NaN	establishment of localization;establishment of protein localization;protein transport;transport		cell part;cytoplasm;intracellular membrane-bounded organelle;intracellular organelle;intracellular part;membrane-bounded organelle;nucleus;organelle			11	9	9	13.1	11.4	11.4	124.71	0	34.778	295140000	151090000	144050000	0.902343
0.0102952	0.174764	-0.139512	-0.88286	-0.0189401	-0.134666	0.0814205	-0.0120922	-0.0880475	-0.100094	0.389982	-0.287325	-0.140616	-0.889846	-0.01909	-0.135731	0.0892483	-0.0887443	-0.100886	-0.306136	-0.459098	-0.276636	-0.152533	-0.102642	-0.442462	-0.58221	-0.284656	-0.144039	-0.91151	-0.139036	0.0910149	0.435936	establishment of localization;establishment of localization in cell;intracellular transport;nuclear export;nuclear transport;nucleocytoplasmic transport;transport		cell part;intracellular membrane-bounded organelle;intracellular organelle;intracellular part;membrane-bounded organelle;nucleus;organelle			19	19	19	23.3	23.3	23.3	118.02	0	160.29	2154300000	1383200000	771160000	0.367827
1.15794	0.928857	-0.281506	-0.519928	0.701502	-0.0617196	1.10116	0.989083	0.456619	0.153799	0.306176	0.897268	-0.283734	-0.524043	0.768945	-0.062208	1.20702	0.500519	0.168585	0.945242	0.801622	1.11318	0.439678	-0.191127	0.570471	-0.02647	1.64336	-0.290642	-0.536801	-0.0637225	1.23091	0.342255	alcohol biosynthetic process;alcohol metabolic process;biological regulation;biosynthetic process;carbohydrate biosynthetic process;carbohydrate metabolic process;cell surface receptor linked signaling pathway;cellular biosynthetic process;cellular carbohydrate biosynthetic process;cellular carbohydrate metabolic process;cellular metabolic process;cellular nitrogen compound metabolic process;cell…	binding;carbon-oxygen lyase activity;catalytic activity;coenzyme binding;cofactor binding;GDP-mannose 4,6-dehydratase activity;hydro-lyase activity;lyase activity;NADP binding;NADP+ binding;nucleotide binding	cell part;cytoplasm;extracellular membrane-bounded organelle;extracellular organelle;extracellular region part;extracellular vesicular exosome;intracellular part;membrane-bounded organelle;membrane-bounded vesicle;organelle;vesicle	Amino sugar and nucleotide sugar metabolism;Fructose and mannose metabolism		17	17	17	58.9	58.9	58.9	41.949	0	169.55	2733700000	2009300000	724320000	0.229706
-0.713977	-1.25828	-0.0816365	-0.213277	-1.35582	-0.121775	-0.6495	-0.916175	-0.857676	0.0200104	-0.757002	-1.495	-0.0822826	-0.214965	-1.36655	-0.122739	-0.65464	-0.864463	0.0219342	-1.12544	-0.665903	-1.13969	-1.09312	-1.49596	-0.838846	-1.12867	-1.78235	-0.0842857	-0.220198	-0.125727	-0.670577	-0.781568	anatomical structure development;anatomical structure morphogenesis;basement membrane assembly;basement membrane organization;biological regulation;cell morphogenesis;cell morphogenesis involved in differentiation;cellular component assembly;cellular component assembly at cellular level;cellular component morphogenesis;cellular component organization;cellular component organization at cellular le…	binding;carboxylic acid binding;catalytic activity;cation binding;galactosyltransferase activity;glucosyltransferase activity;ion binding;iron ion binding;L-ascorbic acid binding;metal ion binding;oxidoreductase activity;oxidoreductase activity, acting on paired donors, with incorporation or reduction of molecular oxygen;oxidoreductase activity, acting on paired donors, with incorporation or redu…	cell part;cytoplasmic part;endoplasmic reticulum;endoplasmic reticulum membrane;endoplasmic reticulum part;extracellular membrane-bounded organelle;extracellular organelle;extracellular region part;extracellular vesicular exosome;intracellular membrane-bounded organelle;intracellular organelle;intracellular organelle part;intracellular part;membrane;membrane part;membrane-bounded organelle;membra…	Lysine degradation;Other types of O-glycan biosynthesis	+	28	28	28	48.1	48.1	48.1	84.784	0	252.34	12326000000	6275900000	6050200000	0.00900543
1.34836	-0.16395	0.682201	2.18595	1.99401	2.62477	1.96481	1.16021	1.11328	3.09146	2.58006	-0.188877	0.747787	2.39611	2.18572	2.87712	2.1537	1.22031	3.38867	-0.473024	1.36734	-1.34742	-0.905806	0.304785	0.819368	-0.0594969	-0.723222	0.762589	2.44354	2.93407	2.19633	2.88409	activation of immune response;activation of innate immune response;anatomical structure formation involved in morphogenesis;antibiotic transport;apoptosis;biological regulation;carboxylic acid metabolic process;cell activation;cell death;cell surface pattern recognition receptor signaling pathway;cell surface receptor linked signaling pathway;cellular alkene metabolic process;cellular component a…	binding;carbohydrate binding;diacyl lipopeptide binding;glycosaminoglycan binding;lipopeptide binding;lipopolysaccharide binding;lipopolysaccharide receptor activity;lipoteichoic acid binding;molecular transducer activity;pattern binding;pattern recognition receptor activity;peptide binding;peptidoglycan binding;polysaccharide binding;protein binding;protein dimerization activity;protein heterodi…	cell body;cell part;cell projection;cell surface;cytoplasm;external side of plasma membrane;integral to membrane;integral to plasma membrane;intracellular part;intrinsic to membrane;intrinsic to plasma membrane;macromolecular complex;membrane;membrane part;plasma membrane;plasma membrane part;protein complex;Toll-like receptor 1-Toll-like receptor 2 protein complex;Toll-like receptor 2-Toll-like …	Amoebiasis;Chagas disease (American trypanosomiasis);ko05152;Leishmaniasis;Malaria;Measles;Phagosome;Rheumatoid arthritis;Toll-like receptor signaling pathway;Toxoplasmosis	+	34	34	34	56.9	56.9	56.9	89.837	0	323.31	9660400000	7883300000	1777000000	0.000183374
1.66889	1.83072	-1.07067	-0.730705	1.33598	0.595516	1.01147	1.50265	0.14974	0.303334	0.0747952	0.63377	-1.07915	-0.736487	1.46442	0.652769	1.10871	0.164136	0.332496	0.986318	0.873205	-0.293202	-0.962691	-0.0595596	0.565259	-1.01507	0.687436	-1.10542	-0.754417	0.66569	1.13065	0.0836089	actin cytoskeleton organization;actin filament organization;actin filament polymerization;actin filament-based process;actin polymerization or depolymerization;biological regulation;cell projection organization;cellular component assembly;cellular component assembly at cellular level;cellular component organization;cellular component organization at cellular level;cellular component organization …	binding;ion channel binding;protein binding;receptor binding	cell part;cell projection;cell projection membrane;cell projection part;cytoplasmic part;cytoskeletal part;cytosol;intracellular non-membrane-bounded organelle;intracellular organelle;intracellular organelle part;intracellular part;leading edge membrane;membrane part;mitotic spindle;neuron projection;non-membrane-bounded organelle;organelle;organelle part;plasma membrane part;ruffle membrane;spin…	Focal adhesion;Regulation of actin cytoskeleton;Shigellosis		62	62	1	57.9	57.9	0.6	141.35	0	323.31	64591000000	32472000000	32119000000	0.154767
0.585357	0.654612	1.00454	1.03617	0.706073	1.36303	0.632685	0.769701	0.901902	1.24946	0.806437	0.518897	1.10112	1.13579	0.773954	1.49408	0.693511	0.988611	1.36958	0.868086	0.895195	0.438252	0.850679	0.0398389	0.856619	0.370053	0.634445	1.12292	1.15827	1.52365	0.707239	0.901466	cellular macromolecule metabolic process;cellular metabolic process;cellular process;cellular protein metabolic process;'de novo' posttranslational protein folding;'de novo' protein folding;macromolecule metabolic process;metabolic process;primary metabolic process;protein folding;protein metabolic process	binding;selenium binding	cell part;cytoplasmic part;endoplasmic reticulum lumen;endoplasmic reticulum part;extracellular membrane-bounded organelle;extracellular organelle;extracellular region part;extracellular vesicular exosome;intracellular organelle lumen;intracellular organelle part;intracellular part;membrane-bounded organelle;membrane-bounded vesicle;membrane-enclosed lumen;organelle;organelle lumen;organelle part…		+	7	7	7	51.2	51.2	51.2	17.79	0	145.82	5700400000	4365000000	1335400000	0.00596453
0.244417	0.604843	-0.325796	-0.0832494	0.216351	0.298231	0.578387	0.22985	0.533536	0.493607	0.291154	0.380286	-0.328375	-0.0839082	0.237151	0.326903	0.633993	0.584831	0.541063	-0.176156	0.115508	-0.117373	-0.115492	-0.391023	-0.442854	-0.453028	0.287857	-0.336369	-0.0859509	0.333373	0.646542	0.325463	cellular component organization;cellular component organization at cellular level;cellular component organization or biogenesis;cellular component organization or biogenesis at cellular level;cellular localization;cellular macromolecule localization;cellular macromolecule metabolic process;cellular metabolic process;cellular process;cellular protein complex localization;cellular protein localizat…	binding;protein binding;SNARE binding	cell cortex part;cell part;cytoplasmic part;cytoplasmic vesicle membrane;cytoplasmic vesicle part;cytosol;exocyst;intracellular organelle part;intracellular part;macromolecular complex;membrane;organelle membrane;organelle part;protein complex;secretory granule membrane;vesicle membrane	Tight junction	+	14	14	14	25.4	25.4	25.4	73.796	0	54.143	1983800000	1314100000	669720000	0.0119464
0.804513	0.0163177	-1.22031	-1.25016	0.447075	-0.237027	0.7159	0.902288	-0.975611	-0.430686	-0.556787	-0.497034	-1.22997	-1.26005	0.490057	-0.238903	0.784727	-0.983332	-0.434094	0.725039	0.438963	-0.322681	0.353385	-1.17179	0.218718	-0.869772	0.982459	-1.25991	-1.29072	-0.244719	0.800259	-0.574855	cellular process;establishment of localization;transport;vesicle-mediated transport		cell part;cytoplasm;cytoplasmic part;endosomal part;endosome;endosome membrane;Golgi apparatus;intracellular membrane-bounded organelle;intracellular organelle;intracellular organelle part;intracellular part;lipid particle;membrane;membrane-bounded organelle;organelle;organelle membrane;organelle part			24	24	24	83.4	83.4	83.4	47.074	0	323.31	59363000000	41769000000	17593000000	0.552838
-0.873596	-1.14537	-0.47139	-0.204249	-0.892878	-1.41731	-1.53649	-1.00392	-1.12088	-2.43375	-1.46578	-0.703286	-0.475121	-0.205865	-0.899944	-1.42853	-1.54865	-1.12975	-2.45301	-1.59974	-0.824905	-1.22867	-1.24232	NaN	-1.54204	-0.283825	-0.176406	-0.486688	-0.210877	-1.46331	-1.58635	-1.51335	biological regulation;cellular component organization;cellular component organization at cellular level;cellular component organization or biogenesis;cellular component organization or biogenesis at cellular level;cellular macromolecule metabolic process;cellular metabolic process;cellular process;cellular protein metabolic process;chromatin modification;chromatin organization;chromosome organiza…	amine binding;amino acid binding;arginine N-methyltransferase activity;binding;carboxylic acid binding;catalytic activity;cation binding;histone methyltransferase activity;histone-arginine N-methyltransferase activity;ion binding;metal ion binding;methyltransferase activity;modified amino acid binding;N-methyltransferase activity;protein methyltransferase activity;protein-arginine N-methyltransfe…	cell part;cytoplasm;cytoplasmic part;cytosol;intracellular non-membrane-bounded organelle;intracellular organelle;intracellular part;macromolecular complex;non-membrane-bounded organelle;organelle;ribonucleoprotein complex;ribosome			12	12	12	26.7	26.7	26.7	59.875	0	22.822	853990000	400420000	453570000	0.912164
-0.212861	0.00452538	-0.0603466	-0.120801	-0.141103	0.0489022	-0.112436	-0.181773	-0.161825	-0.0506188	-0.00416557	-0.285109	-0.0608241	-0.121757	-0.142219	0.0536036	-0.113326	-0.163106	-0.0510194	-0.324823	-0.634397	-0.340551	-0.39347	-0.436207	-0.107641	-0.0908614	-0.240319	-0.0623049	-0.124721	0.0546647	-0.116085	-0.00430075	biological regulation;establishment of localization;establishment of localization in cell;establishment of protein localization;intracellular protein transport;intracellular transport;maternal process involved in female pregnancy;multicellular organismal process;multicellular organismal reproductive process;NLS-bearing substrate import into nucleus;nuclear import;nuclear transport;nucleocytoplasm…	protein transporter activity;substrate-specific transporter activity;transporter activity	cell part;cytoplasm;intracellular membrane-bounded organelle;intracellular organelle;intracellular part;membrane;membrane-bounded organelle;nucleus;organelle		+	21	21	11	57.6	57.6	35.3	60.029	0	306.71	10037000000	5921300000	4115800000	0.000544293
-0.679004	-0.638098	-1.43452	-2.08362	-0.461734	-0.426245	-1.10911	-1.46709	-1.68683	-1.5654	-1.40572	-0.898847	-1.44588	-2.10011	-0.465389	-0.429618	-1.11788	-1.70018	-1.57779	-0.308001	-1.76025	-1.03378	-1.75854	-1.29053	-0.765206	-0.801002	-1.76935	-1.48108	-2.15124	-0.440077	-1.1451	-1.45134	alcohol metabolic process;amine metabolic process;aminoglycan biosynthetic process;aminoglycan metabolic process;anatomical structure morphogenesis;biosynthetic process;carbohydrate biosynthetic process;carbohydrate metabolic process;carboxylic acid biosynthetic process;carboxylic acid metabolic process;cellular biosynthetic process;cellular carbohydrate metabolic process;cellular glucuronidation…	binding;catalytic activity;coenzyme binding;cofactor binding;electron carrier activity;NAD binding;nucleotide binding;oxidoreductase activity;oxidoreductase activity, acting on CH-OH group of donors;oxidoreductase activity, acting on the CH-OH group of donors, NAD or NADP as acceptor;UDP-glucose 6-dehydrogenase activity	cell part;cytoplasmic part;cytosol;extracellular membrane-bounded organelle;extracellular organelle;extracellular region part;extracellular vesicular exosome;intracellular organelle part;intracellular part;membrane-bounded organelle;membrane-bounded vesicle;nuclear part;nucleoplasm;organelle;organelle part;vesicle	Amino sugar and nucleotide sugar metabolism;Ascorbate and aldarate metabolism;Pentose and glucuronate interconversions;Starch and sucrose metabolism		17	17	17	50.4	50.4	50.4	55.023	0	71.793	1794800000	875870000	918980000	0.717079
0.865824	0.267827	-0.82702	NaN	1.01724	0.271188	1.03028	-0.16253	-0.841853	0.0621165	0.39318	0.0611696	-0.833565	NaN	1.11504	0.29726	1.12933	-0.848516	0.0680884	0.891227	0.313888	-0.680779	-0.586644	-0.772026	0.560863	-1.70664	-0.549475	-0.853858	NaN	0.303143	1.15169	0.439512	biological adhesion;biological regulation;biosynthetic process;cell adhesion;cellular biosynthetic process;cellular component assembly;cellular component organization;cellular component organization or biogenesis;cellular macromolecule biosynthetic process;cellular macromolecule metabolic process;cellular metabolic process;cellular nitrogen compound metabolic process;cellular process;cellular res…	binding;cation binding;ion binding;metal ion binding;protein binding transcription factor activity;transcription cofactor activity;transcription factor binding transcription factor activity;transition metal ion binding;zinc ion binding	adherens junction;anchoring junction;cell junction;cell part;cell projection;cell-substrate adherens junction;cell-substrate junction;cytoplasm;cytoplasmic part;cytoskeletal part;focal adhesion;intracellular membrane-bounded organelle;intracellular non-membrane-bounded organelle;intracellular organelle;intracellular organelle part;intracellular part;macromolecular complex;membrane;membrane-bounde…			13	13	13	44.8	44.8	44.8	43.332	0	130.35	3767600000	2613700000	1153900000	0.587194
1.37617	1.91088	1.35339	0.87525	0.184977	1.99118	1.27971	0.950983	NaN	1.06379	1.99329	0.0114275	1.48351	0.959397	0.202761	2.18261	1.40274	NaN	1.16606	0.765771	0.392941	0.506624	1.3088	0.490921	1.701	0.837842	1.25527	1.51287	0.978387	2.22582	1.43051	2.22817	adherens junction organization;anatomical structure development;biological adhesion;biological regulation;biosynthetic process;brain development;cell adhesion;cell junction assembly;cell junction organization;cell surface receptor linked signaling pathway;cell-cell adhesion;cell-cell junction organization;cellular biosynthetic process;cellular component assembly;cellular component assembly at cel…	binding;cadherin binding;cell adhesion molecule binding;protein binding;receptor binding	adherens junction;anchoring junction;cell junction;cell part;cell projection;cell projection part;cell-cell adherens junction;cell-cell junction;cytoplasm;cytoplasmic part;cytosol;dendritic spine;extracellular membrane-bounded organelle;extracellular organelle;extracellular region part;extracellular vesicular exosome;growth cone;intracellular membrane-bounded organelle;intracellular organelle;int…	Adherens junction;Leukocyte transendothelial migration		19	19	19	32.6	32.6	32.6	101.76	0	229.01	781570000	606820000	174750000	0.219058
0.306867	-0.282294	-0.281083	-0.432373	0.0636818	0.0567268	0.528125	-0.301555	-0.34085	0.149655	-0.250564	-0.500335	-0.283307	-0.435795	0.0698042	0.0621805	0.578899	-0.343547	0.164043	-0.409356	-0.074265	-0.381798	-0.497139	-0.73422	-0.521778	-0.647618	-0.0425408	-0.290204	-0.446404	0.0634113	0.590358	-0.258695	biological regulation;posttranscriptional regulation of gene expression;regulation of biological process;regulation of biosynthetic process;regulation of cellular biosynthetic process;regulation of cellular macromolecule biosynthetic process;regulation of cellular metabolic process;regulation of cellular process;regulation of cellular protein metabolic process;regulation of gene expression;regula…	binding;nucleic acid binding;RNA binding;translation factor activity, nucleic acid binding;translation initiation factor activity		RNA transport		10	10	4	81.4	81.4	45.1	12.823	0	229.93	4971000000	3168900000	1802100000	0.164644
0.70487	0.347315	-0.623804	-0.412883	0.639949	0.37879	0.954619	0.48343	-0.239645	0.28249	-0.0699776	-0.0672592	-0.62874	-0.416151	0.701474	0.415207	1.0464	-0.241542	0.309648	0.0677624	0.170363	-0.802789	-0.487981	-0.490173	-0.305822	-0.914669	0.258109	-0.644047	-0.426282	0.423425	1.06711	-0.0722484	anatomical structure morphogenesis;cell part morphogenesis;cell projection morphogenesis;cell projection organization;cellular component assembly;cellular component morphogenesis;cellular component organization;cellular component organization at cellular level;cellular component organization or biogenesis;cellular component organization or biogenesis at cellular level;cellular developmental proce…	binding;epidermal growth factor receptor binding;growth factor receptor binding;insulin receptor binding;lipid binding;phosphatidylinositol binding;phospholipid binding;protein binding;protein complex binding;receptor binding	cell part;cell projection;cytoplasm;cytoplasmic part;early endosome membrane;endosomal part;endosome membrane;extracellular membrane-bounded organelle;extracellular organelle;extracellular region part;extracellular vesicular exosome;extrinsic to membrane;intracellular membrane-bounded organelle;intracellular organelle;intracellular organelle part;intracellular part;lamellipodium;macromolecular co…			23	21	21	46.1	42	42	58.47	0	257.5	15961000000	8970000000	6991400000	0.186448
[truncated: 4,294 more rows]
[truncated: 5 more columns]

## Sheet: Significant proteins (HSD)
RELAPSE	RELAPSE_CN	RELAPSE_M1M2	RELAPSE_NPM1_MUT	GOBP name	GOMF name	GOCC name	KEGG name	ANOVA Significant	Peptides	Razor + unique peptides	Unique peptides	Sequence coverage [%]	Unique + razor sequence coverage [%]	Unique sequence coverage [%]	Mol. weight [kDa]	Q-value	Score	Intensity	Intensity L	Intensity H	ANOVA p value	Protein IDs	Majority protein IDs	Protein names	Gene names	id	Significant pairs
[truncated: 1,022 more rows]
