# Supplementary material for: High Mitochondrial Protein Expression as a Potential Predictor of Relapse Risk in Acute Myeloid Leukemia Patients with the Monocytic FAB subtypes M4 and M5
Source: Preprints.org preprint supplement (doi:10.20944/preprints202310.1628.v1), 2023-10-25
Supplement: Supplementary file 3 [file Supplementary file 2_Phosphoproteomics data REL_M1_M2_ and REL_M4_M5 subgroups.xlsx]

## Sheet: Details
Details:
Datasheet "Phosphosites" contains MS phosphoproteome data from each patients (row 2 of datashhet "Phosphosites") and AML disease subgroups: 12 REL_M4/5_all, 7 REL_M4/5_CN, 8 REL_M1/2_all and 5 REL_M4/5_mut. CN refers to normal cytogenetics and mut to NPM1 Ins mutation. It shows phosphoproteomic data after selecting at least 3 quantified phosphosites (valid values, VV) in each group. ANOVA P-value…
Patient number with no sufix, with sufix _1 and sufix_2 indicates a patient that is found in the non-stratified subgroups, in the CN-stratified subgroups and in the mut-stratified subgroups, respectively
Datasheet "Significant phosphosites (HSD)" contains significantly different phosphosite pairs after applying post hoc Turkey’s Honest Significance Difference (HSD) test with FDR < 0.05 on the significant findings of the ANOVA multiple sample test
RELAPSE alone refers to RELAPSE_M4M5

## Sheet: Phosphosites
P11	P17	P18	P2	P22	P23	P34	P37	P45	P50	P51	P52	P18_1	P2_1	P22_1	P23_1	P34_1	P45_1	P50_1	P12	P19	P32	P40	P48	P5	P6	P9	P18_2	P2_2	P23_2	P34_2	P51_2	Amino acid	Charge	Protein group IDs	Multiplicity	GOBP name	GOMF name	GOCC name	KEGG name	Motifs	ANOVA Significant	Localization prob	PEP	Score	Intensity	Intensity L	Intensity H	Position	Score diff
REL_M4/5_all	REL_M4/5_all	REL_M4/5_all	REL_M4/5_all	REL_M4/5_all	REL_M4/5_all	REL_M4/5_all	REL_M4/5_all	REL_M4/5_all	REL_M4/5_all	REL_M4/5_all	REL_M4/5_all	REL_M4/5_CN	REL_M4/5_CN	REL_M4/5_CN	REL_M4/5_CN	REL_M4/5_CN	REL_M4/5_CN	REL_M4/5_CN	RELAPSE_M1M2	RELAPSE_M1M2	RELAPSE_M1M2	RELAPSE_M1M2	RELAPSE_M1M2	RELAPSE_M1M2	RELAPSE_M1M2	RELAPSE_M1M2	REL_M4/5_mut	REL_M4/5_mut	REL_M4/5_mut	REL_M4/5_mut	REL_M4/5_mut
NaN	0.732421	2.07543	NaN	0.0239595	0.623269	NaN	0.672995	NaN	0.962087	1.80034	NaN	2.02603	NaN	0.0233893	0.608435	NaN	NaN	0.939188	0.0548324	0.87407	1.55088	1.02998	-0.738934	1.48391	NaN	1.05488	2.21346	NaN	0.664721	NaN	1.92008	S	3	7;8	___1	cellular component organization;cellular component organization or biogenesis;cellular membrane organization;cellular process;endocytosis;establishment of localization;lipid transport;membrane invagination;membrane organization;organic substance transport;transport;vesicle-mediated transport	alcohol binding;amine binding;binding;calcium ion binding;calcium-dependent phospholipid binding;cation binding;identical protein binding;ion binding;lipid binding;metal ion binding;phosphatidylcholine binding;phosphatidylethanolamine binding;phosphatidylinositol binding;phospholipid binding;protein binding;quaternary ammonium group binding	cell part;cytoplasmic part;endoplasmic reticulum part;extrinsic to internal side of plasma membrane;extrinsic to membrane;extrinsic to plasma membrane;integral to membrane;integral to plasma membrane;intracellular organelle part;intracellular part;intrinsic to endoplasmic reticulum membrane;intrinsic to membrane;intrinsic to organelle membrane;intrinsic to plasma membrane;membrane;membrane part;o…		Casein kinase II substrate motif;PKA kinase substrate motif		0.985901	2.43e-147	185.15	17153000000	12479000000	4673400000	663	18.4455
0.0197672	-0.356101	-0.0658345	-0.0391613	-0.244874	-0.0792406	-0.439149	-0.63405	-0.398022	-0.184853	-0.19014	-0.415344	-0.0699638	-0.0416176	-0.260233	-0.0842108	-0.466694	-0.422987	-0.196448	-0.256033	-0.222192	0.118351	-0.145248	-0.243683	-0.0978433	NaN	0.0561831	-0.0671672	-0.0399541	-0.0808447	-0.448039	-0.193989	S	3	9	___1		protein binding transcription factor activity;RNA polymerase II transcription cofactor activity;RNA polymerase II transcription factor binding transcription factor activity;transcription cofactor activity;transcription factor binding transcription factor activity	cell part;intracellular membrane-bounded organelle;intracellular organelle;intracellular organelle part;intracellular part;macromolecular complex;mediator complex;membrane-bounded organelle;nuclear part;nucleoplasm part;nucleus;organelle;organelle part;protein complex		ERK1,2 kinase substrate motif;G protein-coupled receptor kinase 1 substrate motif;GSK-3, ERK1, ERK2, CDK5 substrate motif;PKA kinase substrate motif;PKC kinase substrate motif;WW domain binding motif		1	2.28e-135	212.09	7694000000	4685100000	3009000000	226	77.0025
1.81902	NaN	NaN	NaN	1.52304	0.369752	1.69969	1.05087	NaN	NaN	1.66529	3.56632	NaN	NaN	1.48679	0.360951	1.65923	NaN	NaN	NaN	NaN	2.50565	2.0581	2.30454	NaN	NaN	2.73657	NaN	NaN	0.394343	1.81273	1.77605	S	2	23;4152	___1					Casein kinase I substrate motif;PKA kinase substrate motif		0.999989	0.000662058	104.2	148520000	124340000	24182000	NaN	49.4594
1.4782	0.11888	-0.541539	NaN	1.51203	-0.405881	0.891478	0.409999	NaN	0.956361	-0.0716412	NaN	-0.575506	NaN	1.47604	-0.431339	0.870259	NaN	0.933598	NaN	0.755262	0.241137	NaN	NaN	0.154212	NaN	0.704744	-0.552502	NaN	-0.414098	0.950767	-0.0730916	S	2	27	___1	biological regulation;regulation of biological process;regulation of biosynthetic process;regulation of cellular biosynthetic process;regulation of cellular macromolecule biosynthetic process;regulation of cellular metabolic process;regulation of cellular process;regulation of gene expression;regulation of macromolecule biosynthetic process;regulation of macromolecule metabolic process;regulation…				Phosphorylase kinase substrate motif;Pim1 kinase substrate sequence;PKA kinase substrate motif;PKC kinase substrate motif		0.999919	1.44e-25	97.124	206650000	140150000	66497000	792	40.956
0.611738	-0.909238	NaN	1.13737	1.28383	-0.789949	NaN	0.331301	NaN	NaN	0.329449	-0.22131	NaN	1.11029	1.25327	-0.839497	NaN	NaN	NaN	NaN	NaN	-1.21702	NaN	0.530039	-0.170372	NaN	-0.149215	NaN	1.21301	-0.805941	NaN	0.35136	S	3	38	___1			cell part;membrane		14-3-3 domain binding motif;AMP-activated protein kinase substrate motif;Calmodulin-dependent protein kinase I substrate motif;Calmodulin-dependent protein kinase II substrate motif;Calmodulin-dependent protein kinase IV substrate motif;Chk1 kinase substrate motif;PKA kinase substrate motif;PKC kinase substrate motif;ZIP kinase substrate motif		0.999344	3.36e-36	142.43	236790000	174180000	62614000	1379	31.8273
0.908012	-0.929496	NaN	NaN	1.68668	0.501029	1.53383	0.696942	NaN	1.10735	0.777063	NaN	NaN	NaN	1.64654	0.489104	1.49732	NaN	1.08099	NaN	1.41393	NaN	-2.40056	0.282724	-0.214025	NaN	0.477604	NaN	NaN	0.534351	1.63584	0.828743	S	2	38	___1			cell part;membrane		14-3-3 domain binding motif;Aurora-A kinase substrate motif;Calmodulin-dependent protein kinase II substrate motif;Casein kinase II substrate motif;G protein-coupled receptor kinase 1 substrate motif;MDC1 BRCT domain binding motif;PAK2 kinase substrate motif;Phosphorylase kinase substrate motif;PKA kinase substrate motif;PKC epsilon kinase substrate motif;PKC kinase substrate motif;Plk1 PBD domai…		0.943588	1.87e-52	170.53	1508700000	1214200000	294450000	597	12.2358
0.182825	0.573976	1.0104	0.384204	NaN	-0.0417607	-0.132521	0.0610535	-0.0177586	0.168754	0.607861	0.672242	0.986354	0.375059	NaN	-0.04438	-0.140833	-0.0188725	0.164738	0.281096	0.578149	0.695226	NaN	0.552771	0.545953	NaN	0.382179	1.0776	0.409756	-0.0426061	-0.135204	0.648288	S	3	46	___1	biological regulation;biosynthetic process;cellular biosynthetic process;cellular macromolecule biosynthetic process;cellular macromolecule metabolic process;cellular metabolic process;cellular nitrogen compound metabolic process;cellular process;macromolecule biosynthetic process;macromolecule metabolic process;metabolic process;nitrogen compound metabolic process;nucleic acid metabolic process;…	binding;cation binding;DNA binding;ion binding;metal ion binding;nucleic acid binding	cell part;intracellular membrane-bounded organelle;intracellular organelle;intracellular part;membrane-bounded organelle;nucleus;organelle		Casein kinase I substrate motif;ERK1,2 kinase substrate motif;Growth associated histone HI kinase substrate motif;GSK-3, ERK1, ERK2, CDK5 substrate motif;WW domain binding motif		1	4.41e-24	147.83	817670000	553750000	263910000	112	55.6603
2.80228	NaN	-0.718675	2.39516	1.20602	2.68654	2.73931	2.65616	2.43058	3.61325	1.48595	4.39691	-0.763752	2.33815	1.17731	2.6226	2.67411	2.37273	3.52725	1.74395	2.36752	NaN	NaN	0.972559	2.36845	NaN	-0.434981	-0.733224	2.55445	2.86522	2.92149	1.58477	S	3	1687;53	___1	antigen processing and presentation;antigen processing and presentation of exogenous antigen;antigen processing and presentation of exogenous peptide antigen;antigen processing and presentation of exogenous peptide antigen via MHC class I;antigen processing and presentation of exogenous peptide antigen via MHC class I, TAP-dependent;antigen processing and presentation of peptide antigen;antigen p…	binding;catalytic activity;electron carrier activity;lipid binding;oxidoreductase activity;oxidoreductase activity, acting on NADH or NADPH;oxidoreductase activity, acting on NADH or NADPH, oxygen as acceptor;phosphatidylinositol binding;phosphatidylinositol-3,4-bisphosphate binding;phospholipid binding;protein binding;protein domain specific binding;SH3 domain binding;superoxide-generating NADPH…	cell body;cell part;cell projection;cytoplasm;cytoplasmic membrane-bounded vesicle;cytoplasmic part;cytoplasmic vesicle;cytosol;dendrite;endocytic vesicle;endoplasmic reticulum;extrinsic to membrane;Golgi apparatus;intracellular membrane-bounded organelle;intracellular organelle;intracellular part;lysosome;lytic vacuole;macromolecular complex;membrane part;membrane-bounded organelle;membrane-boun…	Chemokine signaling pathway;Fc gamma R-mediated phagocytosis;Leishmaniasis;Leukocyte transendothelial migration;Osteoclast differentiation;Phagosome	ATM kinase substrate motif;DNA dependent Protein kinase substrate motif;PAK2 kinase substrate motif;Pim1 kinase substrate sequence;PKA kinase substrate motif;PKC kinase substrate motif		1	7.74e-12	145.28	1164400000	1073100000	91246000	320	124.873
-2.29477	-4.77216	-2.89522	-4.20831	-3.4448	-3.59037	-3.60299	-6.126	-1.79564	-2.63981	-5.51708	NaN	-3.07682	-4.47227	-3.66087	-3.81557	-3.82898	-1.90827	-2.80539	-4.33225	-2.41736	-2.66995	-3.40605	NaN	-2.71715	NaN	-5.04824	-2.95383	-4.2935	-3.66306	-3.67593	-5.62877	S	2	59	___1	anatomical structure development;biological adhesion;biological regulation;biosynthetic process;cartilage condensation;cell adhesion;cell differentiation;cell proliferation;cell-cell adhesion;cellular biosynthetic process;cellular developmental process;cellular macromolecule biosynthetic process;cellular macromolecule metabolic process;cellular metabolic process;cellular nitrogen compound metabol…	binding;DNA binding;nucleic acid binding;sequence-specific DNA binding	cell part;intracellular membrane-bounded organelle;intracellular organelle;intracellular part;membrane-bounded organelle;nucleus;organelle		ERK1,2 kinase substrate motif;Growth associated histone HI kinase substrate motif;GSK-3, ERK1, ERK2, CDK5 substrate motif;PKA kinase substrate motif;PKC kinase substrate motif;WW domain binding motif		1	3.35e-19	144.82	1280200000	90314000	1189900000	443	42.7909
0.51191	1.6139	2.86774	NaN	NaN	0.0949411	0.994735	-0.246859	1.28962	0.51219	-0.664731	NaN	2.79949	NaN	NaN	0.0926814	0.971059	1.25893	0.499999	-1.82828	-0.349271	1.08443	2.2808	0.22423	0.864664	NaN	0.943609	3.05847	NaN	0.101255	1.06089	-0.678188	S	3	6179;67	___1	biological regulation;biosynthetic process;carbohydrate metabolic process;carbohydrate transport;cell cycle;cell cycle process;cell surface receptor linked signaling pathway;cellular biosynthetic process;cellular component disassembly;cellular component disassembly at cellular level;cellular component organization;cellular component organization at cellular level;cellular component organization o…		cell part;cytoplasmic part;endoplasmic reticulum membrane;endoplasmic reticulum part;envelope;intracellular organelle part;intracellular part;macromolecular complex;membrane;membrane part;nuclear envelope;nuclear membrane;nuclear part;nuclear pore;organelle envelope;organelle membrane;organelle part;pore complex;protein complex	RNA transport	MDC1 BRCT domain binding motif;Plk1 PBD domain binding motif		0.991454	2.23e-23	156	1815800000	1151700000	664080000	358	20.7298
0.226497	-0.245387	1.75247	1.31206	1.18407	0.260886	0.189945	-0.21417	NaN	1.07243	1.49279	0.784655	1.71076	1.28083	1.15588	0.254676	0.185424	NaN	1.0469	0.836632	1.74085	1.46053	0.062011	-0.592453	0.263962	NaN	0.32343	1.86902	1.39932	0.278236	0.202578	1.59207	S	2	75	___1	adaptive immune response;adaptive immune response based on somatic recombination of immune receptors built from immunoglobulin superfamily domains;biological adhesion;cell adhesion;cell gliding;cell migration;cell motility;cell-substrate adhesion;cellular component movement;cellular process;establishment of localization;establishment of localization in cell;exocytosis;immune effector process;immu…	adenyl nucleotide binding;adenyl ribonucleotide binding;ATP binding;binding;catalytic activity;hydrolase activity;hydrolase activity, acting on acid anhydrides;hydrolase activity, acting on acid anhydrides, in phosphorus-containing anhydrides;lipid binding;motor activity;nucleoside-triphosphatase activity;nucleotide binding;phosphatidylinositol binding;phosphatidylinositol-3,4,5-trisphosphate bin…	cell part;cell projection;cytoskeletal part;extracellular membrane-bounded organelle;extracellular organelle;extracellular region part;extracellular vesicular exosome;filopodium;intracellular organelle part;intracellular part;lamellipodium;leading edge membrane;macromolecular complex;membrane;membrane part;membrane-bounded organelle;membrane-bounded vesicle;microvillus;myosin complex;organelle;or…		Casein kinase II substrate motif;PKA kinase substrate motif;PKC kinase substrate motif		0.994598	0.000276813	93.623	205490000	150070000	55414000	1010	22.651
-0.307628	-0.96763	-1.15402	NaN	-0.973837	-1.29598	-0.879952	-0.320391	-1.98228	-1.50726	-1.29014	-0.308336	-1.2264	NaN	-1.03492	-1.37726	-0.935145	-2.10661	-1.6018	NaN	-1.10444	-0.221417	NaN	-1.29898	-1.14789	NaN	-0.364652	-1.17738	NaN	-1.32221	-0.897766	-1.31625	S	3	80	___1					Casein kinase II substrate motif;ERK1,2 kinase substrate motif;G protein-coupled receptor kinase 1 substrate motif;Growth associated histone HI kinase substrate motif;GSK3 kinase substrate motif;GSK-3, ERK1, ERK2, CDK5 substrate motif;MAPKAPK2 kinase substrate motif;WW domain binding motif		0.997793	1.22e-37	125.04	521330000	253000000	268320000	21	27.018
1.56696	0.557075	-0.733226	0.718408	1.09535	0.799027	1.45618	1.52302	0.965368	0.575624	0.416277	1.01305	-0.779217	0.701309	1.06927	0.780009	1.42152	0.942391	0.561923	1.3117	1.08194	0.252201	-0.0860291	0.92329	0.774919	NaN	0.442258	-0.74807	0.766188	0.852168	1.55303	0.443962	S	2	229	___1			cell part;integral to membrane;intrinsic to membrane;membrane part		14-3-3 domain binding motif;Aurora-A kinase substrate motif;Calmodulin-dependent protein kinase II substrate motif;G protein-coupled receptor kinase 1 substrate motif;GSK3 kinase substrate motif;PAK2 kinase substrate motif;Phosphorylase kinase substrate motif;PKA kinase substrate motif;PKC epsilon kinase substrate motif;PKC kinase substrate motif		1	6.28e-78	191.4	3389200000	2628700000	760470000	94	78.0405
1.39563	0.728921	NaN	NaN	0.584501	1.15377	0.838593	1.53122	0.0567545	0.48773	0.452061	0.647601	NaN	NaN	0.570589	1.12631	0.818633	0.0554036	0.476121	1.14747	0.419104	NaN	0.0982354	0.354767	NaN	NaN	0.313227	NaN	NaN	1.2305	0.894365	0.482126	S	2	229	___1			cell part;integral to membrane;intrinsic to membrane;membrane part		14-3-3 domain binding motif;Calmodulin-dependent protein kinase II substrate motif;Casein kinase II substrate motif;G protein-coupled receptor kinase 1 substrate motif;GSK3 kinase substrate motif;PKA kinase substrate motif;PKC kinase substrate motif		0.997249	2.58e-14	153.75	684240000	513590000	170650000	85	27.6492
1.57068	NaN	-0.896087	0.243448	0.736037	NaN	1.39557	0.894792	-0.0485456	0.809389	NaN	NaN	-0.952292	0.237654	0.718519	NaN	1.36235	-0.0515905	0.790125	1.22785	0.69602	-0.364487	NaN	0.497436	0.741817	NaN	0.300564	-0.914228	0.259639	NaN	1.48839	NaN	S	2	229	___1			cell part;integral to membrane;intrinsic to membrane;membrane part		14-3-3 domain binding motif;Akt kinase substrate motif;AMP-activated protein kinase 2 substrate motif;Calmodulin-dependent protein kinase II substrate motif;Casein kinase II substrate motif;G protein-coupled receptor kinase 1 substrate motif;MAPKAPK1 kinase substrate motif;MAPKAPK2 kinase substrate motif;PKA kinase substrate motif;PKC kinase substrate motif		0.997007	6.49e-06	96.626	224860000	165040000	59827000	87	26.4662
1.36804	0.525992	-0.618165	NaN	0.970592	1.20486	1.13064	1.54622	NaN	0.412447	1.02474	NaN	-0.656938	NaN	0.947491	1.17618	1.10373	NaN	0.40263	1.06323	0.987996	0.449991	0.106358	0.383836	1.1686	NaN	0.624283	-0.630679	NaN	1.28499	1.20584	1.09289	S	2	229	___1			cell part;integral to membrane;intrinsic to membrane;membrane part		14-3-3 domain binding motif;Akt kinase substrate motif;Calmodulin-dependent protein kinase II substrate motif;G protein-coupled receptor kinase 1 substrate motif;GSK3 kinase substrate motif;MAPKAPK1 kinase substrate motif;p70 Ribosomal S6 kinase substrate motif;Phosphorylase kinase substrate motif;PKA kinase substrate motif;PKC kinase substrate motif		0.999967	2.32e-17	137.17	2132300000	1562900000	569460000	155	44.8525
0.732373	0.463824	-0.644013	0.283499	0.241376	0.373127	0.719586	0.810847	-0.531794	-0.0790583	0.179795	0.67652	-0.684408	0.276751	0.235631	0.364246	0.702459	-0.56515	-0.0840171	0.674516	0.331719	-0.168197	0.344807	0.632731	0.533633	NaN	0.966316	-0.657051	0.302353	0.397943	0.767444	0.191752	S	3	247	___1					14-3-3 domain binding motif;Calmodulin-dependent protein kinase II substrate motif;Calmodulin-dependent protein kinase IV substrate motif;Casein kinase II substrate motif;Chk1 kinase substrate motif;ERK1,2 kinase substrate motif;GSK-3, ERK1, ERK2, CDK5 substrate motif;PKA kinase substrate motif;PKC kinase substrate motif;Pyruvate dehydrogenase kinase substrate motif;WW domain binding motif		0.995939	6.43e-148	216.14	26218000000	18699000000	7519200000	17	23.8964
0.145005	NaN	-1.08939	0.791957	0.305598	0.642771	0.541351	-0.226606	NaN	1.24871	NaN	NaN	-1.15772	0.773107	0.298324	0.627472	0.528466	NaN	1.21899	-0.570519	-0.00749262	-0.132216	-0.364542	-0.390135	-0.349758	NaN	NaN	-1.11145	0.844628	0.68552	0.577355	NaN	S	2	249	___1	anterograde axon cargo transport;anterograde synaptic vesicle transport;antigen processing and presentation;antigen processing and presentation of exogenous antigen;antigen processing and presentation of lipid antigen via MHC class Ib;antigen processing and presentation via MHC class Ib;antigen processing and presentation, exogenous lipid antigen via MHC class Ib;axon cargo transport;biological r…	binding;enzyme binding;GTP-dependent protein binding;phosphatase binding;protein binding;protein phosphatase binding	AP-3 adaptor complex;AP-type membrane coat adaptor complex;cell part;clathrin coated vesicle membrane;coated vesicle membrane;cytoplasmic part;cytoplasmic vesicle membrane;cytoplasmic vesicle part;Golgi apparatus;intracellular membrane-bounded organelle;intracellular organelle;intracellular organelle part;intracellular part;lysosomal membrane;macromolecular complex;membrane;membrane part;membrane…	Lysosome	b-Adrenergic Receptor kinase substrate motif;Casein kinase II substrate motif;Pyruvate dehydrogenase kinase substrate motif		1	2.83e-23	115.91	930590000	595120000	335460000	227	69.0304
NaN	-0.325715	0.49717	0.0940408	-0.903283	0.090838	NaN	-0.557999	NaN	0.0868845	-0.177557	NaN	0.485337	0.0918025	-0.959939	0.088676	NaN	NaN	0.0848165	-0.0101453	0.180419	-0.893214	-0.711492	-0.390255	NaN	NaN	-1.0484	0.530235	0.100295	0.0968794	NaN	-0.181151	S	3	260	___1	biological regulation;biosynthetic process;cellular biosynthetic process;cellular component organization;cellular component organization at cellular level;cellular component organization or biogenesis;cellular component organization or biogenesis at cellular level;cellular macromolecule biosynthetic process;cellular macromolecule metabolic process;cellular metabolic process;cellular nitrogen comp…	acid-amino acid ligase activity;binding;catalytic activity;chromatin binding;DNA binding;enzyme binding;ligase activity;ligase activity, forming carbon-nitrogen bonds;nucleic acid binding;protein binding;protein binding transcription factor activity;regulatory region DNA binding;regulatory region nucleic acid binding;RNA binding;single-stranded RNA binding;small conjugating protein binding;small …	cell part;intracellular membrane-bounded organelle;intracellular organelle;intracellular organelle part;intracellular part;macromolecular complex;membrane-bounded organelle;nuclear body;nuclear part;nuclear speck;nucleoplasm;nucleoplasm part;nucleus;organelle;organelle part;PcG protein complex;PRC1 complex;protein complex		14-3-3 domain binding motif;Akt kinase substrate motif;Calmodulin-dependent protein kinase II substrate motif;Casein kinase II substrate motif;G protein-coupled receptor kinase 1 substrate motif;MAPKAPK1 kinase substrate motif;PKA kinase substrate motif;PKC kinase substrate motif		0.994771	8.94e-10	102.64	650290000	383020000	267270000	415	22.7929
-0.302937	0.63352	0.663768	-0.118365	-0.0803959	-0.148534	-0.00719724	-0.513144	0.325825	0.0705083	-0.350035	0.151237	0.647969	-0.12579	-0.0854386	-0.157851	-0.00764867	0.31807	0.0688301	-0.365822	-0.476621	-0.312839	-0.462551	-0.522726	-0.243975	NaN	-0.67636	0.707913	-0.120762	-0.151541	-0.00734294	-0.357122	S	3	262	___1	axon guidance;chemotaxis;locomotion;response to chemical stimulus;response to external stimulus;response to stimulus;taxis	binding;cation binding;heme binding;ion binding;iron ion binding;lipid binding;metal ion binding;steroid binding;tetrapyrrole binding;transition metal ion binding	cell part;cytoplasmic part;endoplasmic reticulum;endoplasmic reticulum membrane;endoplasmic reticulum part;extracellular membrane-bounded organelle;extracellular organelle;extracellular region part;extracellular vesicular exosome;integral to membrane;intracellular membrane-bounded organelle;intracellular non-membrane-bounded organelle;intracellular organelle;intracellular organelle part;intracell…		BARD1 BRCT domain binding motif;Casein kinase II substrate motif	+	0.999999	1.85e-74	165.38	4407500000	2685400000	1722100000	181	60.7069
-0.472017	-0.235271	0.824963	0.649232	0.0591534	0.38963	-0.251786	0.1079	0.498738	0.327582	1.01556	-0.0266672	0.805328	0.633779	0.0577455	0.380357	-0.267579	0.486867	0.319785	0.290015	0.478245	0.814286	0.342293	0.093564	0.684162	NaN	0.930837	0.879829	0.69241	0.415543	-0.256884	1.0831	S	2	263	___1	biological regulation;biosynthetic process;cell cycle;cellular biosynthetic process;cellular component organization;cellular component organization at cellular level;cellular component organization or biogenesis;cellular component organization or biogenesis at cellular level;cellular macromolecule biosynthetic process;cellular macromolecule metabolic process;cellular metabolic process;cellular ni…	binding;chromatin binding;enzyme binding;protein binding;protein dimerization activity;protein heterodimerization activity	cell part;DSIF complex;intracellular membrane-bounded organelle;intracellular organelle;intracellular organelle part;intracellular part;macromolecular complex;membrane-bounded organelle;nuclear part;nucleoplasm;nucleoplasm part;nucleus;organelle;organelle part;protein complex;transcription elongation factor complex		ERK1,2 kinase substrate motif;G protein-coupled receptor kinase 1 substrate motif;Growth associated histone HI kinase substrate motif;GSK3 kinase substrate motif;GSK-3, ERK1, ERK2, CDK5 substrate motif;PKA kinase substrate motif;PKC kinase substrate motif;WW domain binding motif		1	3.19e-35	141.08	1356700000	895620000	461090000	662	73.0962
-1.33262	-0.306252	NaN	-0.623259	-1.44868	-0.128724	-1.15388	-1.07581	NaN	NaN	-0.000915045	-0.614384	NaN	-0.662352	-1.53955	-0.136798	-1.22626	NaN	NaN	-1.27905	-1.16352	0.156429	-0.441799	-1.39071	-0.713052	NaN	-1.0816	NaN	-0.635876	-0.13133	-1.17724	-0.000933569	S	2	269	___1	biological regulation;biosynthetic process;cellular biosynthetic process;cellular component assembly;cellular component assembly at cellular level;cellular component organization;cellular component organization at cellular level;cellular component organization or biogenesis;cellular component organization or biogenesis at cellular level;cellular macromolecular complex assembly;cellular macromolec…	binding;catalytic activity;cysteine-type peptidase activity;hydrolase activity;nucleic acid binding;peptidase activity;peptidase activity, acting on L-amino acid peptides;RNA binding;small conjugating protein-specific protease activity;translation factor activity, nucleic acid binding;translation initiation factor activity;ubiquitin-specific protease activity	cell part;cytoplasmic part;cytosol;eukaryotic 43S preinitiation complex;eukaryotic 48S preinitiation complex;eukaryotic translation initiation factor 3 complex;intracellular part;macromolecular complex;membrane;protein complex;ribonucleoprotein complex;translation preinitiation complex	RNA transport	AMP-activated protein kinase substrate motif;Cdc2 kinase substrate motif;CDK kinase substrate motif;CDK1,2,4,6 kinase substrate motif;ERK1,2 kinase substrate motif;GSK-3, ERK1, ERK2, CDK5 substrate motif;PKA kinase substrate motif;WW domain binding motif		1	0.0019261	123.21	335120000	168790000	166330000	258	74.1059
0.661342	0.323674	2.51933	NaN	NaN	2.10954	1.60347	0.817947	NaN	1.73426	2.57211	NaN	2.45937	NaN	NaN	2.05933	1.56531	NaN	1.69298	0.789332	0.608695	NaN	NaN	1.09196	0.893584	NaN	2.46079	2.68689	NaN	2.24984	1.71011	2.74318	S	2	294	___1	anatomical structure development;anatomical structure formation involved in morphogenesis;anatomical structure morphogenesis;angiogenesis;biological regulation;cell development;cellular developmental process;cellular process;definitive hemopoiesis;developmental process;hemopoiesis;hemopoietic or lymphoid organ development;lens morphogenesis in camera-type eye;megakaryocyte development;negative re…	binding;chromatin binding;core promoter proximal region DNA binding;core promoter proximal region sequence-specific DNA binding;DNA binding;nucleic acid binding;nucleic acid binding transcription factor activity;regulatory region DNA binding;regulatory region nucleic acid binding;RNA polymerase II core promoter proximal region sequence-specific DNA binding;RNA polymerase II core promoter proximal…	cell part;intracellular membrane-bounded organelle;intracellular organelle;intracellular organelle part;intracellular part;macromolecular complex;membrane-bounded organelle;nuclear part;nucleoplasm part;nucleus;organelle;organelle part;protein complex;transcription factor complex		Casein kinase II substrate motif	+	0.999953	7.86e-105	231.06	936410000	793920000	142490000	194	43.2888
-0.457086	0.603175	0.589012	-0.217506	-0.224495	-0.339354	-0.225126	-0.779852	-0.171157	0.152388	-0.0829993	-0.253757	0.574992	-0.231148	-0.238576	-0.360639	-0.239246	-0.181892	0.148761	-0.577396	-0.246392	-0.260935	0.0248679	-1.25043	-0.509687	-0.174084	-0.705558	0.628185	-0.221909	-0.346224	-0.229683	-0.0846796	S	2	309	___1	biological regulation;regulation of biological process;regulation of cell growth;regulation of cellular component organization;regulation of cellular process;regulation of growth	apoptotic protease activator activity;enzyme activator activity;enzyme regulator activity;peptidase activator activity;peptidase regulator activity	adherens junction;anchoring junction;cell junction;cell part;cell-substrate adherens junction;cell-substrate junction;cytoplasmic membrane-bounded vesicle;cytoplasmic part;cytoplasmic vesicle;focal adhesion;Golgi apparatus;Golgi apparatus part;Golgi membrane;integral to membrane;intracellular membrane-bounded organelle;intracellular organelle;intracellular organelle part;intracellular part;intrin…		14-3-3 domain binding motif;Akt kinase substrate motif;Calmodulin-dependent protein kinase II substrate motif;MAPKAPK1 kinase substrate motif;PKA kinase substrate motif;PKC epsilon kinase substrate motif;PKC kinase substrate motif		1	7.81e-152	222.63	20022000000	11759000000	8263200000	36	75.636
-0.456965	NaN	0.800218	NaN	-0.015191	0.165699	NaN	0.345621	NaN	0.0425068	0.878295	NaN	0.781171	NaN	-0.0161438	0.161755	NaN	NaN	0.0414951	0.489089	NaN	0.859343	-0.475492	-0.502644	-0.271029	NaN	NaN	0.853438	NaN	0.176719	NaN	0.936708	S	3	313	___1	cellular macromolecule metabolic process;cellular metabolic process;cellular nitrogen compound metabolic process;cellular process;macromolecule metabolic process;macromolecule modification;metabolic process;ncRNA metabolic process;ncRNA processing;nitrogen compound metabolic process;nucleic acid metabolic process;nucleobase-containing compound metabolic process;primary metabolic process;RNA metab…	binding;nucleic acid binding;RNA binding;snoRNA binding	box C/D snoRNP complex;cell part;cytoplasm;intracellular non-membrane-bounded organelle;intracellular organelle;intracellular organelle part;intracellular part;macromolecular complex;membrane;non-membrane-bounded organelle;nuclear part;nucleolar part;nucleolus;nucleoplasm;organelle;organelle part;preribosome;pre-snoRNP complex;ribonucleoprotein complex;small nucleolar ribonucleoprotein complex;sm…	Ribosome biogenesis in eukaryotes	Casein kinase II substrate motif;MDC1 BRCT domain binding motif;Plk1 PBD domain binding motif		1	6.19e-93	194.75	12558000000	6795800000	5761800000	570	49.6619
2.04323	1.7553	1.88489	3.35283	0.516684	1.8882	1.9347	2.1068	2.02911	3.18826	2.22164	1.62731	1.84002	3.27303	0.504386	1.84326	1.88865	1.98082	3.11237	2.16297	NaN	0.891002	0.091996	0.725023	0.613213	1.58971	1.68505	2.01024	3.57582	2.01378	2.06337	2.36939	S	3	313	___1	cellular macromolecule metabolic process;cellular metabolic process;cellular nitrogen compound metabolic process;cellular process;macromolecule metabolic process;macromolecule modification;metabolic process;ncRNA metabolic process;ncRNA processing;nitrogen compound metabolic process;nucleic acid metabolic process;nucleobase-containing compound metabolic process;primary metabolic process;RNA metab…	binding;nucleic acid binding;RNA binding;snoRNA binding	box C/D snoRNP complex;cell part;cytoplasm;intracellular non-membrane-bounded organelle;intracellular organelle;intracellular organelle part;intracellular part;macromolecular complex;membrane;non-membrane-bounded organelle;nuclear part;nucleolar part;nucleolus;nucleoplasm;organelle;organelle part;preribosome;pre-snoRNP complex;ribonucleoprotein complex;small nucleolar ribonucleoprotein complex;sm…	Ribosome biogenesis in eukaryotes	14-3-3 domain binding motif;Calmodulin-dependent protein kinase II substrate motif;Casein kinase II substrate motif;G protein-coupled receptor kinase 1 substrate motif;MAPKAPK1 kinase substrate motif;Pim1 kinase substrate sequence;PKA kinase substrate motif;PKC epsilon kinase substrate motif;PKC kinase substrate motif	+	1	8.2e-103	197.37	12133000000	9886300000	2247100000	563	49.6619
0.188456	-0.331009	1.37765	NaN	0.453611	0.0288992	-0.595407	0.156722	NaN	0.557182	0.533237	1.49965	1.34486	NaN	0.442814	0.0282113	-0.632753	NaN	0.543921	NaN	0.692524	1.75048	1.77396	0.463105	1.04124	NaN	NaN	1.46928	NaN	0.0308212	-0.60746	0.568701	S	2	329	___1	anatomical structure development;anatomical structure formation involved in morphogenesis;androgen receptor signaling pathway;ATP-dependent chromatin remodeling;biological regulation;biosynthetic process;blood vessel development;cardiac chamber development;cellular biosynthetic process;cellular component disassembly;cellular component disassembly at cellular level;cellular component organization;…	binding;DNA binding;ligand-dependent nuclear receptor binding;nucleic acid binding;protein binding;protein binding transcription factor activity;receptor binding;transcription coactivator activity;transcription cofactor activity;transcription factor binding transcription factor activity	cell part;chromatin;chromatin remodeling complex;chromosomal part;intracellular membrane-bounded organelle;intracellular organelle;intracellular organelle part;intracellular part;macromolecular complex;membrane-bounded organelle;nBAF complex;npBAF complex;nuclear chromatin;nuclear chromosome part;nuclear part;nucleoplasm;nucleus;organelle;organelle part;protein complex;SWI/SNF complex;SWI/SNF-typ…		Casein kinase II substrate motif;G protein-coupled receptor kinase 1 substrate motif;GSK3 kinase substrate motif;PKA kinase substrate motif;PKC kinase substrate motif		1	6.59e-06	111.31	991990000	722130000	269860000	1751	81.0196
0.134134	0.426644	0.467907	0.800962	1.69475	1.08764	0.292711	0.205787	-0.418736	0.662385	0.764108	NaN	0.45677	0.781898	1.65441	1.06175	0.285744	-0.445	0.646619	-0.365177	-0.236913	0.908041	0.339102	-0.0881768	0.676484	NaN	0.477859	0.499026	0.854231	1.15997	0.312178	0.814926	S	2	329	___1	anatomical structure development;anatomical structure formation involved in morphogenesis;androgen receptor signaling pathway;ATP-dependent chromatin remodeling;biological regulation;biosynthetic process;blood vessel development;cardiac chamber development;cellular biosynthetic process;cellular component disassembly;cellular component disassembly at cellular level;cellular component organization;…	binding;DNA binding;ligand-dependent nuclear receptor binding;nucleic acid binding;protein binding;protein binding transcription factor activity;receptor binding;transcription coactivator activity;transcription cofactor activity;transcription factor binding transcription factor activity	cell part;chromatin;chromatin remodeling complex;chromosomal part;intracellular membrane-bounded organelle;intracellular organelle;intracellular organelle part;intracellular part;macromolecular complex;membrane-bounded organelle;nBAF complex;npBAF complex;nuclear chromatin;nuclear chromosome part;nuclear part;nucleoplasm;nucleus;organelle;organelle part;protein complex;SWI/SNF complex;SWI/SNF-typ…		14-3-3 domain binding motif;AMP-activated protein kinase substrate motif;Calmodulin-dependent protein kinase II substrate motif;Casein kinase II substrate motif;DNA dependent Protein kinase substrate motif;ERK1,2 kinase substrate motif;GSK-3, ERK1, ERK2, CDK5 substrate motif;HMGCoA Reductase kinase substrate motif;PKA kinase substrate motif;PKC kinase substrate motif;WW domain binding motif		1	8.16e-36	141.83	4611400000	3144100000	1467300000	696	78.1396
0.215787	0.16469	-0.195992	-0.0423517	0.111042	0.354533	0.0901817	0.461815	-0.280379	0.230397	0.101633	0.687063	-0.208285	-0.0450082	0.108399	0.346094	0.0880353	-0.297966	0.224913	0.197673	0.388334	0.79799	0.148377	0.448369	0.499952	NaN	0.187008	-0.19996	-0.0432091	0.378111	0.0961795	0.108392	S	3	329	___1	anatomical structure development;anatomical structure formation involved in morphogenesis;androgen receptor signaling pathway;ATP-dependent chromatin remodeling;biological regulation;biosynthetic process;blood vessel development;cardiac chamber development;cellular biosynthetic process;cellular component disassembly;cellular component disassembly at cellular level;cellular component organization;…	binding;DNA binding;ligand-dependent nuclear receptor binding;nucleic acid binding;protein binding;protein binding transcription factor activity;receptor binding;transcription coactivator activity;transcription cofactor activity;transcription factor binding transcription factor activity	cell part;chromatin;chromatin remodeling complex;chromosomal part;intracellular membrane-bounded organelle;intracellular organelle;intracellular organelle part;intracellular part;macromolecular complex;membrane-bounded organelle;nBAF complex;npBAF complex;nuclear chromatin;nuclear chromosome part;nuclear part;nucleoplasm;nucleus;organelle;organelle part;protein complex;SWI/SNF complex;SWI/SNF-typ…		Casein kinase II substrate motif;ERK1,2 kinase substrate motif;G protein-coupled receptor kinase 1 substrate motif;GSK3 kinase substrate motif;GSK-3, ERK1, ERK2, CDK5 substrate motif;WW domain binding motif		0.999939	1.64e-63	145.04	2857200000	1936500000	920650000	363	42.3852
0.549281	-0.422951	-0.0846162	-0.372338	0.799077	0.939519	0.663768	1.05977	NaN	0.891075	0.107497	NaN	-0.0899236	-0.395692	0.780058	0.917157	0.64797	NaN	0.869866	1.18272	0.409197	-0.149527	0.657546	0.0183069	-0.0473848	NaN	0.447578	-0.0863292	-0.379875	1.002	0.707913	0.114646	S	3	329	___1	anatomical structure development;anatomical structure formation involved in morphogenesis;androgen receptor signaling pathway;ATP-dependent chromatin remodeling;biological regulation;biosynthetic process;blood vessel development;cardiac chamber development;cellular biosynthetic process;cellular component disassembly;cellular component disassembly at cellular level;cellular component organization;…	binding;DNA binding;ligand-dependent nuclear receptor binding;nucleic acid binding;protein binding;protein binding transcription factor activity;receptor binding;transcription coactivator activity;transcription cofactor activity;transcription factor binding transcription factor activity	cell part;chromatin;chromatin remodeling complex;chromosomal part;intracellular membrane-bounded organelle;intracellular organelle;intracellular organelle part;intracellular part;macromolecular complex;membrane-bounded organelle;nBAF complex;npBAF complex;nuclear chromatin;nuclear chromosome part;nuclear part;nucleoplasm;nucleus;organelle;organelle part;protein complex;SWI/SNF complex;SWI/SNF-typ…		14-3-3 domain binding motif;Calmodulin-dependent protein kinase II alpha substrate motif;Calmodulin-dependent protein kinase II substrate motif;Calmodulin-dependent protein kinase IV substrate motif;Chk1 kinase substrate motif;MAPKAPK2 kinase substrate motif;Phosphorylase kinase substrate motif;PKA kinase substrate motif;PKC kinase substrate motif		0.975259	1.1e-98	222.78	1649800000	1153100000	496720000	1184	15.957
-1.79494	-2.15098	-1.64786	-2.0302	-3.62403	-0.380418	-1.70443	-1.58921	-1.46098	-1.38809	NaN	-1.99218	-1.75122	-2.15755	-3.85134	-0.404279	-1.81134	-1.55261	-1.47515	-2.02829	-3.53968	-1.35369	NaN	NaN	-1.93223	NaN	-4.46421	-1.68122	-2.0713	-0.388119	-1.73894	NaN	S	3	343	___1	anatomical structure development;biological regulation;cell cycle phase;cell cycle process;cell differentiation;cell projection organization;cellular component organization;cellular component organization at cellular level;cellular component organization or biogenesis;cellular component organization or biogenesis at cellular level;cellular developmental process;cellular process;cellular response …	adenyl nucleotide binding;adenyl ribonucleotide binding;ATP binding;binding;catalytic activity;cation binding;ion binding;kinase activity;metal ion binding;nucleotide binding;PDZ domain binding;phosphotransferase activity, alcohol group as acceptor;protein binding;protein domain specific binding;protein kinase activity;protein serine/threonine kinase activity;purine nucleotide binding;purine ribo…	actin cytoskeleton;cell body;cell part;cell projection;cytoplasmic part;cytoskeleton;cytosol;Golgi apparatus part;Golgi cisterna;intracellular membrane-bounded organelle;intracellular non-membrane-bounded organelle;intracellular organelle;intracellular organelle part;intracellular part;membrane;membrane-bounded organelle;neuronal cell body;non-membrane-bounded organelle;organelle;organelle part;o…		14-3-3 domain binding motif;Calmodulin-dependent protein kinase II substrate motif;Calmodulin-dependent protein kinase IV substrate motif;Cdc2 kinase substrate motif;CDK kinase substrate motif;CDK1,2,4,6 kinase substrate motif;Chk1 kinase substrate motif;CLK1 kinase substrate motif;ERK1,2 kinase substrate motif;G protein-coupled receptor kinase 1 substrate motif;Growth associated histone HI kinas…		1	0.000306529	73.273	629070000	244620000	384450000	2013	51.1346
0.377493	NaN	NaN	NaN	0.28212	0.312675	0.0831747	0.596123	0.0943071	NaN	0.822242	NaN	NaN	NaN	0.275405	0.305233	0.081195	0.0920624	NaN	NaN	-0.128755	NaN	-0.864342	-1.24878	-0.371082	NaN	NaN	NaN	NaN	0.33347	0.0887064	0.876926	S	2	344	___1	cellular component organization;cellular component organization at cellular level;cellular component organization or biogenesis;cellular component organization or biogenesis at cellular level;cellular process;COPI coating of Golgi vesicle;ER to Golgi vesicle-mediated transport;establishment of localization;establishment of localization in cell;establishment of protein localization;Golgi transport…	structural molecule activity	cell part;COPI vesicle coat;cytoplasmic part;cytoplasmic vesicle part;cytosol;Golgi apparatus;Golgi apparatus part;intracellular membrane-bounded organelle;intracellular organelle;intracellular organelle part;intracellular part;macromolecular complex;membrane coat;membrane part;membrane-bounded organelle;nuclear part;nucleoplasm;organelle;organelle part;protein complex;vesicle coat		14-3-3 domain binding motif;Aurora-A kinase substrate motif;b-Adrenergic Receptor kinase substrate motif;Calmodulin-dependent protein kinase II substrate motif;MAPKAPK2 kinase substrate motif;PAK2 kinase substrate motif;Phosphorylase kinase substrate motif;PKA kinase substrate motif;PKC epsilon kinase substrate motif;PKC kinase substrate motif	+	1	2.08e-05	110.55	152860000	94128000	58737000	99	70.8885
0.955667	0.492379	-0.0119942	NaN	NaN	-0.0108966	0.648803	0.851446	NaN	-0.0972396	1.4923	1.0701	-0.0127465	NaN	NaN	-0.0115801	0.63336	NaN	-0.103339	0.86651	1.06404	-0.573519	-0.186871	-0.0456488	0.478261	NaN	0.650362	-0.012237	NaN	-0.0111172	0.691953	1.59155	S	3	347	___1	anterograde axon cargo transport;anterograde synaptic vesicle transport;antigen processing and presentation;antigen processing and presentation of exogenous antigen;antigen processing and presentation of lipid antigen via MHC class Ib;antigen processing and presentation via MHC class Ib;antigen processing and presentation, exogenous lipid antigen via MHC class Ib;axon cargo transport;biological r…	transporter activity	axon part;cell part;cell projection part;cytoplasmic part;endosomal part;endosome membrane;Golgi apparatus;Golgi apparatus part;Golgi membrane;intracellular membrane-bounded organelle;intracellular organelle;intracellular organelle part;intracellular part;lysosomal membrane;macromolecular complex;membrane;membrane coat;membrane part;membrane-bounded organelle;nuclear part;nucleoplasm;organelle;or…	Lysosome	Casein kinase II substrate motif;DNA dependent Protein kinase substrate motif;G protein-coupled receptor kinase 1 substrate motif;PKA kinase substrate motif;PKC kinase substrate motif;Pyruvate dehydrogenase kinase substrate motif		1	6.55e-17	130.29	751100000	551600000	199500000	658	76.8199
0.00786285	0.410686	NaN	NaN	NaN	0.557008	0.577217	0.0114818	-0.121619	0.505709	0.326792	0.173143	NaN	NaN	NaN	0.543751	0.563479	-0.129248	0.493673	NaN	0.000715723	0.0351964	NaN	-0.0842148	-0.455059	NaN	NaN	NaN	NaN	0.594053	0.615606	0.348526	S	3	347	___1	anterograde axon cargo transport;anterograde synaptic vesicle transport;antigen processing and presentation;antigen processing and presentation of exogenous antigen;antigen processing and presentation of lipid antigen via MHC class Ib;antigen processing and presentation via MHC class Ib;antigen processing and presentation, exogenous lipid antigen via MHC class Ib;axon cargo transport;biological r…	transporter activity	axon part;cell part;cell projection part;cytoplasmic part;endosomal part;endosome membrane;Golgi apparatus;Golgi apparatus part;Golgi membrane;intracellular membrane-bounded organelle;intracellular organelle;intracellular organelle part;intracellular part;lysosomal membrane;macromolecular complex;membrane;membrane coat;membrane part;membrane-bounded organelle;nuclear part;nucleoplasm;organelle;or…	Lysosome	Casein kinase I substrate motif;ERK1,2 kinase substrate motif;Growth associated histone HI kinase substrate motif;GSK-3, ERK1, ERK2, CDK5 substrate motif;PKA kinase substrate motif;PKC kinase substrate motif;WW domain binding motif	+	1	2.04e-277	305.53	6491400000	4505400000	1986000000	931	126.606
-0.0560807	-0.0905169	-0.346873	-0.519938	-0.385122	-0.0168959	-0.382196	-0.177999	-0.359468	-0.295276	-0.290456	-0.183981	-0.36863	-0.55255	-0.409279	-0.0179557	-0.406168	-0.382014	-0.313796	-0.263764	0.1995	0.164311	-0.0857675	NaN	0.159357	NaN	-0.314761	-0.353895	-0.530463	-0.0172379	-0.389933	-0.296336	S	3	352;353	___1	biological regulation;biosynthetic process;cellular biosynthetic process;cellular component organization;cellular component organization at cellular level;cellular component organization or biogenesis;cellular component organization or biogenesis at cellular level;cellular macromolecule biosynthetic process;cellular macromolecule metabolic process;cellular metabolic process;cellular nitrogen comp…	adenyl nucleotide binding;adenyl ribonucleotide binding;ATP binding;ATPase activity;ATPase activity, coupled;ATP-dependent DNA helicase activity;ATP-dependent helicase activity;binding;catalytic activity;DNA binding;DNA helicase activity;DNA-dependent ATPase activity;helicase activity;histone binding;hydrolase activity;hydrolase activity, acting on acid anhydrides;hydrolase activity, acting on ac…	cell part;cytoplasm;intracellular membrane-bounded organelle;intracellular organelle;intracellular part;membrane-bounded organelle;nucleus;organelle		Casein kinase II substrate motif;ERK1,2 kinase substrate motif;Growth associated histone HI kinase substrate motif;GSK-3, ERK1, ERK2, CDK5 substrate motif;MAPKAPK2 kinase substrate motif;Pyruvate dehydrogenase kinase substrate motif;WW domain binding motif	+	0.999477	5.72e-09	91.355	1544000000	957490000	586530000	1677	34.8412
-0.334415	-0.24162	NaN	NaN	-0.783818	0.431606	-0.317898	-0.14443	NaN	-0.249994	-0.365542	-1.00859	NaN	NaN	-0.832981	0.421333	-0.337838	NaN	-0.265675	0.0651032	0.391792	NaN	0.284539	-0.693529	0.244665	NaN	-0.0708184	NaN	NaN	0.460311	-0.324334	-0.372943	S	3	352	___1	biological regulation;biosynthetic process;cellular biosynthetic process;cellular component organization;cellular component organization at cellular level;cellular component organization or biogenesis;cellular component organization or biogenesis at cellular level;cellular macromolecule biosynthetic process;cellular macromolecule metabolic process;cellular metabolic process;cellular nitrogen comp…	adenyl nucleotide binding;adenyl ribonucleotide binding;ATP binding;ATPase activity;ATPase activity, coupled;ATP-dependent DNA helicase activity;ATP-dependent helicase activity;binding;catalytic activity;DNA binding;DNA helicase activity;DNA-dependent ATPase activity;helicase activity;histone binding;hydrolase activity;hydrolase activity, acting on acid anhydrides;hydrolase activity, acting on ac…	cell part;cytoplasm;intracellular membrane-bounded organelle;intracellular organelle;intracellular part;membrane-bounded organelle;nucleus;organelle		Casein kinase II substrate motif;ERK1,2 kinase substrate motif;Growth associated histone HI kinase substrate motif;GSK-3, ERK1, ERK2, CDK5 substrate motif;WW domain binding motif		0.999996	1.69e-05	98.368	417820000	248350000	169470000	1689	53.68
-0.334415	-0.24162	NaN	NaN	-0.783818	0.431606	-0.317898	-0.14443	NaN	-0.249994	-0.365542	-1.00859	NaN	NaN	-0.832981	0.421333	-0.337838	NaN	-0.265675	0.0651032	0.391792	NaN	0.284539	-0.693529	0.244665	NaN	-0.0708184	NaN	NaN	0.460311	-0.324334	-0.372943	S	3	353	___1	biological regulation;biosynthetic process;cellular biosynthetic process;cellular component organization;cellular component organization at cellular level;cellular component organization or biogenesis;cellular component organization or biogenesis at cellular level;cellular macromolecule biosynthetic process;cellular macromolecule metabolic process;cellular metabolic process;cellular nitrogen comp…	adenyl nucleotide binding;adenyl ribonucleotide binding;ATP binding;ATPase activity;ATPase activity, coupled;ATP-dependent DNA helicase activity;ATP-dependent helicase activity;binding;catalytic activity;DNA binding;DNA helicase activity;DNA-dependent ATPase activity;helicase activity;histone binding;hydrolase activity;hydrolase activity, acting on acid anhydrides;hydrolase activity, acting on ac…	cell part;cytoplasm;intracellular membrane-bounded organelle;intracellular organelle;intracellular part;membrane-bounded organelle;nucleus;organelle		Casein kinase II substrate motif;ERK1,2 kinase substrate motif;Growth associated histone HI kinase substrate motif;GSK-3, ERK1, ERK2, CDK5 substrate motif;WW domain binding motif		0.999996	2.45e-17	113.54	417820000	248350000	169470000	1688	53.68
0.719821	0.653941	1.57174	1.08167	0.590942	1.12852	0.84699	0.669879	0.779024	1.43597	0.578546	1.31554	1.53433	1.05592	0.576876	1.10166	0.826831	0.760482	1.40179	NaN	1.00782	-0.0155938	0.380936	0.685919	0.500729	NaN	0.565731	1.67627	1.1536	1.20357	0.903321	0.617023	S	3	354	___1	anatomical structure development;biological regulation;biosynthetic process;cell differentiation;cellular biosynthetic process;cellular component organization;cellular component organization at cellular level;cellular component organization or biogenesis;cellular component organization or biogenesis at cellular level;cellular developmental process;cellular macromolecule biosynthetic process;cellu…	adenyl nucleotide binding;adenyl ribonucleotide binding;ATP binding;ATPase activity;ATPase activity, coupled;ATP-dependent DNA helicase activity;ATP-dependent helicase activity;binding;catalytic activity;core promoter binding;core promoter sequence-specific DNA binding;DNA binding;DNA helicase activity;DNA-dependent ATPase activity;helicase activity;histone binding;hydrolase activity;hydrolase ac…	cell part;extracellular membrane-bounded organelle;extracellular organelle;extracellular region part;extracellular vesicular exosome;intracellular membrane-bounded organelle;intracellular non-membrane-bounded organelle;intracellular organelle;intracellular organelle part;intracellular part;membrane-bounded organelle;membrane-bounded vesicle;non-membrane-bounded organelle;nuclear part;nucleolus;nu…		14-3-3 domain binding motif;Calmodulin-dependent protein kinase II substrate motif;Casein kinase II substrate motif;PAK2 kinase substrate motif;Pim1 kinase substrate sequence;PKA kinase substrate motif;PKA, PKG kinase substrate motif;PKC epsilon kinase substrate motif;PKC kinase substrate motif;PKG kinase substrate motif;ZIP kinase substrate motif	+	1	9.77e-56	170.38	447530000	323850000	123680000	1728	114.096
-0.425037	-0.332151	-0.480714	-1.25287	-0.172661	-0.471906	0.35803	-0.22905	-1.23793	1.30105	-0.83666	-0.68232	-0.510866	-1.33146	-0.183491	-0.501506	0.349508	-1.31557	1.27008	-0.0825315	0.135419	-0.590175	-1.95631	0.317585	0.230769	-2.57041	0.354498	-0.490446	-1.27823	-0.48146	0.381841	-0.853598	S	2	362	___1	biological regulation;negative regulation of biological process;negative regulation of cell proliferation;negative regulation of cellular process;regulation of biological process;regulation of cell proliferation;regulation of cellular process;response to stimulus;response to stress		cell part;integral to membrane;intrinsic to membrane;membrane part		AMP-activated protein kinase substrate motif;ATM kinase substrate motif;Calmodulin-dependent protein kinase II substrate motif;Casein kinase II substrate motif;Chk1 kinase substrate motif;DNA dependent Protein kinase substrate motif;HMGCoA Reductase kinase substrate motif;PKA kinase substrate motif;PKC kinase substrate motif;Pyruvate dehydrogenase kinase substrate motif		1	2.71e-37	200.93	4007000000	3035900000	971070000	14	67.9043
NaN	1.04533	NaN	1.72591	0.310723	1.26928	NaN	0.801776	NaN	0.774277	1.52164	1.01766	NaN	1.68483	0.303327	1.23907	NaN	NaN	0.755849	NaN	1.12915	1.59614	NaN	0.990678	NaN	NaN	1.62344	NaN	1.84069	1.35369	NaN	1.62284	S	2	363	___1	biological regulation;biosynthetic process;cell growth;cellular biosynthetic process;cellular component organization;cellular component organization at cellular level;cellular component organization or biogenesis;cellular component organization or biogenesis at cellular level;cellular macromolecule biosynthetic process;cellular macromolecule metabolic process;cellular metabolic process;cellular n…	binding;catalytic activity;cation binding;DNA binding;histone methyltransferase activity;histone methyltransferase activity (H3-K4 specific);histone-lysine N-methyltransferase activity;ion binding;lysine N-methyltransferase activity;metal ion binding;methyltransferase activity;N-methyltransferase activity;nucleic acid binding;protein methyltransferase activity;protein-lysine N-methyltransferase a…	cell part;histone methyltransferase complex;intracellular membrane-bounded organelle;intracellular organelle;intracellular organelle part;intracellular part;macromolecular complex;membrane-bounded organelle;methyltransferase complex;nuclear part;nucleoplasm;nucleoplasm part;nucleus;organelle;organelle part;protein complex		14-3-3 domain binding motif;Calmodulin-dependent protein kinase II substrate motif;ERK1,2 kinase substrate motif;G protein-coupled receptor kinase 1 substrate motif;GSK-3, ERK1, ERK2, CDK5 substrate motif;PKA kinase substrate motif;PKC kinase substrate motif;WW domain binding motif		1	0.000137155	67.997	126830000	93123000	33706000	4738	48.284
0.268228	0.772035	NaN	1.51154	0.436371	0.511328	0.189861	NaN	0.441293	0.139114	0.502326	NaN	NaN	1.47556	0.425984	0.499158	0.185342	0.43079	0.135803	NaN	0.9496	0.960263	1.46093	NaN	1.0981	NaN	1.05924	NaN	1.61206	0.545335	0.202488	0.535734	S	2	363	___1	biological regulation;biosynthetic process;cell growth;cellular biosynthetic process;cellular component organization;cellular component organization at cellular level;cellular component organization or biogenesis;cellular component organization or biogenesis at cellular level;cellular macromolecule biosynthetic process;cellular macromolecule metabolic process;cellular metabolic process;cellular n…	binding;catalytic activity;cation binding;DNA binding;histone methyltransferase activity;histone methyltransferase activity (H3-K4 specific);histone-lysine N-methyltransferase activity;ion binding;lysine N-methyltransferase activity;metal ion binding;methyltransferase activity;N-methyltransferase activity;nucleic acid binding;protein methyltransferase activity;protein-lysine N-methyltransferase a…	cell part;histone methyltransferase complex;intracellular membrane-bounded organelle;intracellular organelle;intracellular organelle part;intracellular part;macromolecular complex;membrane-bounded organelle;methyltransferase complex;nuclear part;nucleoplasm;nucleoplasm part;nucleus;organelle;organelle part;protein complex		ERK1,2 kinase substrate motif;G protein-coupled receptor kinase 1 substrate motif;GSK-3, ERK1, ERK2, CDK5 substrate motif;PKA kinase substrate motif;PKC kinase substrate motif;WW domain binding motif		1	4.34e-21	119.38	431850000	316070000	115780000	4359	81.7751
-0.951619	-1.11427	-1.74475	-1.7668	-0.615867	-1.10811	-0.76653	-1.03861	-1.60398	-1.5051	-1.57428	-0.963278	-1.85419	-1.87762	-0.654496	-1.17761	-0.814609	-1.70458	-1.5995	-1.54812	-1.24061	-1.24284	-1.85231	-0.975208	-1.14327	NaN	-1.06202	-1.78007	-1.80257	-1.13054	-0.782048	-1.60615	S	2	369	___1	biological regulation;cellular process;cellular response to chemical stimulus;cellular response to endogenous stimulus;cellular response to growth factor stimulus;cellular response to organic substance;cellular response to stimulus;cellular response to transforming growth factor beta stimulus;negative regulation of biological process;negative regulation of cell proliferation;negative regulation o…	acetyltransferase activator activity;beta-tubulin binding;binding;carbohydrate binding;cytoskeletal protein binding;DNA binding;enzyme activator activity;enzyme regulator activity;glycosaminoglycan binding;heparin binding;nucleic acid binding;pattern binding;polysaccharide binding;protein binding;tubulin binding	cell part;cytoplasm;extracellular membrane-bounded organelle;extracellular organelle;extracellular region part;extracellular vesicular exosome;intracellular membrane-bounded organelle;intracellular organelle;intracellular part;membrane-bounded organelle;membrane-bounded vesicle;nucleus;organelle;vesicle		b-Adrenergic Receptor kinase substrate motif;Casein kinase II substrate motif;PKA kinase substrate motif;Pyruvate dehydrogenase kinase substrate motif		1	0.000251189	111.83	1330700000	601900000	728800000	119	78.742
0.791968	1.17799	-0.468282	0.935481	1.32419	0.28261	1.0711	1.55625	NaN	0.620441	-0.8552	1.46367	-0.497654	0.913216	1.29267	0.275884	1.0456	NaN	0.605674	NaN	1.19782	-0.0266709	0.371368	1.696	0.85504	NaN	0.875738	-0.477762	0.997697	0.301406	1.14233	-0.872512	S	2	371	___1	acid secretion;actin cytoskeleton organization;actin filament-based process;activation of adenylate cyclase activity;activation of adenylate cyclase activity by dopamine receptor signaling pathway;activation of adenylate cyclase activity by G-protein signaling pathway;activation of phospholipase C activity;activation of phospholipase C activity by dopamine receptor signaling pathway;activation of…	adrenergic receptor binding;beta-2 adrenergic receptor binding;beta-catenin binding;binding;channel regulator activity;chloride channel regulator activity;enzyme binding;G-protein-coupled receptor binding;growth factor receptor binding;PDZ domain binding;phosphatase binding;protein binding;protein domain specific binding;protein self-association;receptor binding	actin cytoskeleton;apical plasma membrane;brush border membrane;cell part;cell periphery;cell projection;cell projection membrane;cell projection part;centrosome;cytoplasm;cytoplasmic part;cytoskeletal part;cytoskeleton;endomembrane system;extracellular membrane-bounded organelle;extracellular organelle;extracellular region part;extracellular vesicular exosome;filopodium;intracellular membrane-bo…		14-3-3 domain binding motif;Calmodulin-dependent protein kinase II substrate motif;Calmodulin-dependent protein kinase IV substrate motif;Casein kinase II substrate motif;Chk1 kinase substrate motif;G protein-coupled receptor kinase 1 substrate motif;GSK3 kinase substrate motif;PKA kinase substrate motif;PKC kinase substrate motif		0.972424	1.56e-205	275.68	2230500000	1776100000	454400000	290	17.6784
1.61575	NaN	0.360949	1.05488	2.41941	-0.395507	0.982973	0.301152	NaN	0.420483	1.4448	1.49204	0.352358	1.02977	2.36182	-0.420315	0.959577	NaN	0.410475	0.877126	0.354402	0.266613	-2.07747	NaN	0.865534	NaN	0.370689	0.384955	1.12503	-0.403514	1.04835	1.54089	S	4	385	___1	cellular process;establishment of localization;establishment of localization in cell;establishment of protein localization;Golgi vesicle transport;intracellular transport;post-Golgi vesicle-mediated transport;protein transport;response to chemical stimulus;response to external stimulus;response to extracellular stimulus;response to nutrient;response to nutrient levels;response to retinoic acid;re…	binding;enzyme binding;protein binding;ubiquitin protein ligase binding	cell part;cytoplasmic part;extracellular membrane-bounded organelle;extracellular organelle;extracellular region part;extracellular vesicular exosome;Golgi apparatus part;Golgi membrane;integral to membrane;intracellular organelle part;intracellular part;intrinsic to membrane;membrane;membrane part;membrane-bounded organelle;membrane-bounded vesicle;organelle;organelle membrane;organelle part;ves…		Casein kinase II substrate motif;DNA dependent Protein kinase substrate motif;G protein-coupled receptor kinase 1 substrate motif;PKA kinase substrate motif;PKC kinase substrate motif		1	1.08e-87	148.12	1728100000	1342400000	385760000	32	77.8367
-1.50607	-1.45077	-0.878426	-1.04426	-1.88	-1.76084	-2.06906	-2.36377	-1.26604	-0.550442	-2.16926	-1.44352	-0.933524	-1.10976	-1.99792	-1.87128	-2.19884	-1.34545	-0.584967	-2.02952	-1.55369	-1.87018	NaN	-2.49082	-2.61524	-0.269353	-2.70338	-0.896209	-1.0654	-1.79648	-2.11095	-2.21317	S	2	385;386	___1	cellular process;establishment of localization;establishment of localization in cell;establishment of protein localization;Golgi vesicle transport;intracellular transport;post-Golgi vesicle-mediated transport;protein transport;response to chemical stimulus;response to external stimulus;response to extracellular stimulus;response to nutrient;response to nutrient levels;response to retinoic acid;re…	binding;enzyme binding;protein binding;ubiquitin protein ligase binding	cell part;cytoplasmic part;extracellular membrane-bounded organelle;extracellular organelle;extracellular region part;extracellular vesicular exosome;Golgi apparatus part;Golgi membrane;integral to membrane;intracellular organelle part;intracellular part;intrinsic to membrane;membrane;membrane part;membrane-bounded organelle;membrane-bounded vesicle;organelle;organelle membrane;organelle part;ves…		14-3-3 domain binding motif;Calmodulin-dependent protein kinase II substrate motif;Casein kinase II substrate motif;ERK1,2 kinase substrate motif;G protein-coupled receptor kinase 1 substrate motif;GSK-3, ERK1, ERK2, CDK5 substrate motif;MAPKAPK2 kinase substrate motif;PKA kinase substrate motif;PKC epsilon kinase substrate motif;PKC kinase substrate motif;WW domain binding motif		0.999967	0.000184878	125.54	2260500000	763280000	1497200000	76	44.7817
-2.438	-2.62003	-2.9025	-2.06549	NaN	-1.63157	-2.87254	-2.63208	NaN	-2.45316	-2.19013	-1.80563	-3.08456	-2.19505	NaN	-1.73391	-3.05272	NaN	-2.60703	-2.97427	-3.17678	-1.4618	NaN	-3.33579	-1.64015	NaN	NaN	-2.96126	-2.10731	-1.6646	-2.93069	-2.23447	S	2	397	___1	biological regulation;cellular component assembly;cellular component assembly at cellular level;cellular component organization;cellular component organization at cellular level;cellular component organization or biogenesis;cellular component organization or biogenesis at cellular level;cellular macromolecular complex assembly;cellular macromolecular complex subunit organization;cellular macromol…	acetyltransferase activity;catalytic activity;H4 histone acetyltransferase activity;histone acetyltransferase activity;lysine N-acetyltransferase activity;N-acetyltransferase activity;N-acyltransferase activity;transferase activity;transferase activity, transferring acyl groups;transferase activity, transferring acyl groups other than amino-acyl groups	cell part;chromatin;chromosomal part;cytoplasm;intracellular membrane-bounded organelle;intracellular organelle;intracellular organelle part;intracellular part;macromolecular complex;membrane-bounded organelle;nuclear chromatin;nuclear chromosome part;nuclear matrix;nuclear part;nucleoplasm;nucleus;organelle;organelle part;protein complex		14-3-3 domain binding motif;AMP-activated protein kinase 2 substrate motif;Calmodulin-dependent protein kinase II substrate motif;Cdc2 kinase substrate motif;CDK kinase substrate motif;CDK1,2,4,6 kinase substrate motif;ERK1,2 kinase substrate motif;GSK-3, ERK1, ERK2, CDK5 substrate motif;MAPKAPK1 kinase substrate motif;PKA kinase substrate motif;PKC kinase substrate motif;WW domain binding motif;…		1	0.00827899	125.58	548220000	154670000	393550000	361	84.0679
1.55941	1.58065	-1.70824	0.965854	1.91827	-0.189149	1.35371	0.835899	1.42721	-0.753809	-0.125184	1.34337	-1.81539	0.942865	1.87262	-0.201013	1.32149	1.39324	-0.801091	0.937026	NaN	-0.0702835	-0.403114	1.18689	0.861692	NaN	1.67818	-1.74283	1.03009	-0.192978	1.44374	-0.127718	S	2	407	___1	biological regulation;cell cycle;cell cycle phase;cell cycle process;cellular component organization;cellular component organization at cellular level;cellular component organization or biogenesis;cellular component organization or biogenesis at cellular level;cellular macromolecule metabolic process;cellular metabolic process;cellular process;cellular protein metabolic process;cellular response …	14-3-3 protein binding;binding;enzyme binding;enzyme inhibitor activity;enzyme regulator activity;kinase binding;molecular transducer activity;phosphatase regulator activity;protein binding;protein kinase binding;signal transducer activity	actin cytoskeleton;adherens junction;anchoring junction;cell junction;cell part;cell-substrate adherens junction;cell-substrate junction;centrosome;chromosomal part;contractile fiber;cytoplasm;cytoplasmic part;cytoskeletal part;cytoskeleton;cytosol;focal adhesion;intracellular non-membrane-bounded organelle;intracellular organelle;intracellular organelle part;intracellular part;kinetochore;macrom…	Focal adhesion;Long-term potentiation;Regulation of actin cytoskeleton;Vascular smooth muscle contraction	AMP-activated protein kinase substrate motif;Calmodulin-dependent protein kinase II substrate motif;Chk1 kinase substrate motif;PKA kinase substrate motif;PKC kinase substrate motif		0.993655	7.51e-44	166.48	1394100000	1062900000	331210000	445	21.948
1.76005	2.27225	1.93257	1.85016	0.311404	1.34356	1.25511	1.90783	2.00754	0.90073	1.7313	1.61523	1.88657	1.80613	0.303992	1.31158	1.22524	1.95976	0.879292	1.6189	1.52921	0.941576	NaN	1.21986	2.95102	3.00048	1.54611	2.0611	1.97321	1.43292	1.33858	1.84644	S	3	415	___1		binding;cation binding;ion binding;metal ion binding	cell part;intracellular membrane-bounded organelle;intracellular organelle;intracellular part;membrane-bounded organelle;nucleus;organelle		14-3-3 domain binding motif;ATM kinase substrate motif;Calmodulin-dependent protein kinase II substrate motif;Casein kinase II substrate motif;DNA dependent Protein kinase substrate motif;G protein-coupled receptor kinase 1 substrate motif;GSK3 kinase substrate motif;MAPKAPK1 kinase substrate motif;PAK2 kinase substrate motif;PKA kinase substrate motif;PKC epsilon kinase substrate motif;PKC kinas…		0.999957	7.48e-247	287.17	7964900000	6602200000	1362700000	413	46.653
1.05002	2.09901	2.09097	1.80788	0.0673475	2.0029	0.753163	NaN	1.01053	0.687569	1.60888	NaN	2.0412	1.76485	0.0657445	1.95522	0.735236	0.986481	0.671204	1.898	1.59568	3.06351	2.74636	0.682629	2.24107	NaN	1.59561	2.23003	1.92812	2.1361	0.803253	1.71588	S	2	415	___1		binding;cation binding;ion binding;metal ion binding	cell part;intracellular membrane-bounded organelle;intracellular organelle;intracellular part;membrane-bounded organelle;nucleus;organelle		Casein kinase I substrate motif;Casein kinase II substrate motif;ERK1,2 kinase substrate motif;G protein-coupled receptor kinase 1 substrate motif;GSK3 kinase substrate motif;GSK-3, ERK1, ERK2, CDK5 substrate motif;WW domain binding motif		0.999998	3.91e-33	159.18	1671600000	1273200000	398390000	576	57.9557
-1.4076	-1.36384	-1.91791	NaN	-0.564237	-2.40941	-0.763104	-1.51894	NaN	NaN	-2.19252	NaN	-2.03821	NaN	-0.599628	-2.56054	-0.810968	NaN	NaN	NaN	-1.47282	-1.44591	-2.05766	-0.867744	-1.21659	NaN	-1.25312	-1.95673	NaN	-2.45819	-0.778552	-2.2369	S	4	417	___1	anatomical structure development;cellular component organization;cellular component organization at cellular level;cellular component organization or biogenesis;cellular component organization or biogenesis at cellular level;cellular process;COPII vesicle coating;developmental process;endoplasmic reticulum organization;establishment of localization;establishment of protein localization;organelle …		cell part;cytoplasm;cytoplasmic part;cytosol;endoplasmic reticulum membrane;endoplasmic reticulum part;Golgi apparatus;Golgi apparatus part;Golgi membrane;intracellular membrane-bounded organelle;intracellular organelle;intracellular organelle part;intracellular part;membrane;membrane part;membrane-bounded organelle;organelle;organelle membrane;organelle part		Casein kinase II substrate motif;Pyruvate dehydrogenase kinase substrate motif		0.999193	2.67e-16	89.272	1263800000	565490000	698300000	1149	30.9261
0.432741	-0.014479	-0.811859	-0.614093	0.69464	-0.0817522	0.43057	-0.195021	NaN	-0.0690646	-0.343248	-0.413125	-0.862781	-0.652611	0.678106	-0.0868799	0.420322	NaN	-0.0733965	-0.247567	-0.256065	-0.797723	-0.73866	-0.196635	-0.717583	NaN	-0.253133	-0.828294	-0.626525	-0.0834071	0.459206	-0.350197	S	2	417	___1	anatomical structure development;cellular component organization;cellular component organization at cellular level;cellular component organization or biogenesis;cellular component organization or biogenesis at cellular level;cellular process;COPII vesicle coating;developmental process;endoplasmic reticulum organization;establishment of localization;establishment of protein localization;organelle …		cell part;cytoplasm;cytoplasmic part;cytosol;endoplasmic reticulum membrane;endoplasmic reticulum part;Golgi apparatus;Golgi apparatus part;Golgi membrane;intracellular membrane-bounded organelle;intracellular organelle;intracellular organelle part;intracellular part;membrane;membrane part;membrane-bounded organelle;organelle;organelle membrane;organelle part		14-3-3 domain binding motif;Aurora-A kinase substrate motif;Calmodulin-dependent protein kinase II substrate motif;Casein kinase II substrate motif;MAPKAPK2 kinase substrate motif;MDC1 BRCT domain binding motif;PAK2 kinase substrate motif;Phosphorylase kinase substrate motif;PKA kinase substrate motif;PKC epsilon kinase substrate motif;PKC kinase substrate motif;Plk1 PBD domain binding motif		0.987797	2.55e-135	247.35	5500500000	3378100000	2122500000	1191	20.121
-0.343847	-0.230418	-0.0335091	NaN	-0.0808336	0.0959275	-0.638172	-0.182996	NaN	NaN	0.21453	NaN	-0.0356109	NaN	-0.0859037	0.0936443	-0.678201	NaN	NaN	0.16439	0.0678564	0.272363	-0.108466	0.894091	0.585175	NaN	0.34918	-0.0341875	NaN	0.102307	-0.651092	0.228798	S	3	421	___1	cellular macromolecule metabolic process;cellular metabolic process;cellular nitrogen compound metabolic process;cellular process;macromolecule metabolic process;metabolic process;nitrogen compound metabolic process;nucleic acid metabolic process;nucleobase-containing compound metabolic process;primary metabolic process;RNA metabolic process;RNA processing	binding;nucleotide binding	cell part;intracellular membrane-bounded organelle;intracellular organelle;intracellular organelle part;intracellular part;membrane-bounded organelle;nuclear part;nucleoplasm;nucleus;organelle;organelle part	Spliceosome	b-Adrenergic Receptor kinase substrate motif;ERK1,2 kinase substrate motif;GSK-3, ERK1, ERK2, CDK5 substrate motif;MAPKAPK2 kinase substrate motif;WW domain binding motif	+	1	1.05e-37	148.01	1485500000	921480000	564040000	67	71.6365
NaN	0.340227	NaN	0.0254689	-0.135692	-0.0506461	-0.495153	0.215598	-0.739991	-0.139487	-0.16414	0.202473	NaN	0.0248627	-0.144203	-0.0538228	-0.526211	-0.786406	-0.148236	NaN	0.534658	0.968544	-0.0353057	0.338355	0.544194	NaN	0.114588	NaN	0.0271628	-0.0516714	-0.505177	-0.167463	S	4	448	___1	biological regulation;biosynthetic process;calcium ion homeostasis;catabolic process;cation homeostasis;cellular biosynthetic process;cellular macromolecule biosynthetic process;cellular macromolecule metabolic process;cellular metabolic process;cellular nitrogen compound metabolic process;cellular process;cellular protein metabolic process;cellular response to chemical stimulus;cellular response…	acid-amino acid ligase activity;binding;catalytic activity;cation binding;chromatin binding;DNA binding;estrogen response element binding;histone acetyl-lysine binding;histone binding;ion binding;kinase activity;ligase activity;ligase activity, forming carbon-nitrogen bonds;metal ion binding;nucleic acid binding;p53 binding;phosphotransferase activity, alcohol group as acceptor;protein binding;pr…	cell part;chromatin;chromosomal part;cytoplasmic part;cytosol;euchromatin;intracellular membrane-bounded organelle;intracellular organelle;intracellular organelle part;intracellular part;membrane-bounded organelle;nuclear chromatin;nuclear chromosome part;nuclear euchromatin;nuclear part;nucleoplasm;nucleus;organelle;organelle part;perichromatin fibrils		ERK1,2 kinase substrate motif;Growth associated histone HI kinase substrate motif;GSK-3, ERK1, ERK2, CDK5 substrate motif;WW domain binding motif	+	0.993705	3.01e-44	137.72	1998400000	1315500000	682940000	777	23.6957
2.78577	2.6702	2.08229	-0.733567	2.24941	2.28307	2.14547	2.57089	NaN	2.70996	-0.30949	1.30643	2.03273	-0.779579	2.19587	2.22873	2.0944	NaN	2.64546	2.77426	3.24153	-0.289582	NaN	NaN	2.2977	NaN	NaN	2.22078	-0.748417	2.43491	2.28816	-0.315755	S	2	457;458;459	___1		binding;cation binding;ion binding;metal ion binding;transition metal ion binding;zinc ion binding	actin cytoskeleton;adherens junction;anchoring junction;cell junction;cell part;cell-substrate adherens junction;cell-substrate junction;cytoplasm;cytoskeleton;focal adhesion;intracellular non-membrane-bounded organelle;intracellular organelle;intracellular part;membrane;non-membrane-bounded organelle;organelle;plasma membrane		14-3-3 domain binding motif;b-Adrenergic Receptor kinase substrate motif;Calmodulin-dependent protein kinase II substrate motif;Calmodulin-dependent protein kinase IV substrate motif;Casein kinase II substrate motif;Chk1 kinase substrate motif;G protein-coupled receptor kinase 1 substrate motif;GSK3 kinase substrate motif;PAK2 kinase substrate motif;PKA kinase substrate motif;PKC epsilon kinase s…		0.997176	4.94e-74	187.43	4435200000	3961200000	474010000	466	26.353
-0.345283	-0.0822255	0.223683	-0.166188	-0.219022	-0.222397	-0.140777	-0.284272	NaN	-0.0884462	0.0599309	NaN	0.218359	-0.176612	-0.232759	-0.236347	-0.149607	NaN	-0.0939938	NaN	0.308406	0.0932026	-0.20062	-0.131988	-0.362255	NaN	-0.160803	0.238559	-0.169553	-0.2269	-0.143627	0.0639167	S	3	460	___1	biological regulation;catabolic process;cellular catabolic process;cellular localization;cellular macromolecule catabolic process;cellular macromolecule localization;cellular macromolecule metabolic process;cellular metabolic process;cellular nitrogen compound metabolic process;cellular process;establishment of localization;establishment of RNA localization;gene expression;intracellular mRNA loca…	binding;enzyme binding;identical protein binding;protein binding;ubiquitin protein ligase binding	cell part;cytoplasmic part;cytosol;exon-exon junction complex;intracellular organelle part;intracellular part;macromolecular complex;nuclear body;nuclear part;nuclear speck;nucleoplasm part;organelle part;perinuclear region of cytoplasm;protein complex;ribonucleoprotein complex	mRNA surveillance pathway;RNA transport	Casein kinase I substrate motif;PKA kinase substrate motif;PKC kinase substrate motif		0.999938	4.33e-76	161.49	1676500000	1055600000	620970000	148	43.8408
-0.0241575	-0.13553	0.00887594	-0.0761784	-0.127915	0.0162575	-0.0825949	0.0414218	0.867059	0.254338	-0.0327309	0.292231	0.00866468	-0.0809565	-0.135939	0.0158705	-0.0877755	0.846422	0.248285	0.256939	0.256384	-0.264184	0.180825	0.127022	0.363901	NaN	-0.383621	0.00946625	-0.0777205	0.0173387	-0.084267	-0.0333935	S	3	529	___1	biological regulation;cell cycle arrest;cell cycle process;cellular component assembly;cellular component assembly at cellular level;cellular component organization;cellular component organization at cellular level;cellular component organization or biogenesis;cellular component organization or biogenesis at cellular level;cellular macromolecular complex assembly;cellular macromolecular complex s…		Cajal body;catalytic step 2 spliceosome;cell part;cytoplasm;cytoplasmic part;cytosol;Golgi apparatus;intracellular membrane-bounded organelle;intracellular organelle;intracellular organelle part;intracellular part;macromolecular complex;membrane-bounded organelle;nuclear body;nuclear part;nucleoplasm;nucleoplasm part;organelle;organelle part;ribonucleoprotein complex;small nuclear ribonucleoprote…	Spliceosome	14-3-3 domain binding motif;Calmodulin-dependent protein kinase II substrate motif;Casein kinase II substrate motif;G protein-coupled receptor kinase 1 substrate motif;MAPKAPK1 kinase substrate motif;PAK2 kinase substrate motif;Pim1 kinase substrate sequence;PKA kinase substrate motif;PKC epsilon kinase substrate motif;PKC kinase substrate motif;ZIP kinase substrate motif		1	7.12e-76	157.61	12692000000	8061900000	4629700000	448	84.6861
0.864594	0.898562	-0.39462	0.880838	0.358234	0.604664	1.15062	0.684202	NaN	0.141849	0.718044	0.414269	-0.419372	0.859873	0.349708	0.590272	1.12323	NaN	0.138473	0.345054	0.620444	NaN	0.780867	0.542357	0.430641	NaN	1.15665	-0.402609	0.93942	0.644878	1.22715	0.765799	S	2	539	___1	alcohol metabolic process;carbohydrate metabolic process;cellular carbohydrate metabolic process;cellular metabolic process;cellular process;inositol metabolic process;inositol phosphate metabolic process;metabolic process;organophosphate metabolic process;polyol metabolic process;primary metabolic process;small molecule metabolic process	acid phosphatase activity;adenyl nucleotide binding;adenyl ribonucleotide binding;ATP binding;binding;catalytic activity;diphosphoinositol-pentakisphosphate kinase activity;hydrolase activity;hydrolase activity, acting on ester bonds;inositol 1,3,4,5,6-pentakisphosphate kinase activity;inositol hexakisphosphate 1-kinase activity;inositol hexakisphosphate 3-kinase activity;inositol hexakisphosphat…	cell part;cytoplasmic part;cytosol;intracellular part		ERK1,2 kinase substrate motif;GSK-3, ERK1, ERK2, CDK5 substrate motif;MDC1 BRCT domain binding motif;PKA kinase substrate motif;PKC kinase substrate motif;Plk1 PBD domain binding motif;WW domain binding motif		0.861071	0.0168005	81.32	763680000	565880000	197800000	1172	7.92246
0.339014	-0.183895	NaN	-0.154391	0.673362	-0.819986	NaN	-0.16737	NaN	NaN	-0.046621	NaN	NaN	-0.164075	0.657335	-0.871418	NaN	NaN	NaN	0.0119913	0.166502	-0.617462	NaN	-0.473234	-0.156683	NaN	NaN	NaN	-0.157517	-0.836586	NaN	-0.0475648	S	2	540	___1	activation of immune response;activation of innate immune response;activation of MAPK activity;activation of MAPKK activity;activation of NF-kappaB-inducing kinase activity;activation of protein kinase activity;anatomical structure formation involved in morphogenesis;angiogenesis;antigen receptor-mediated signaling pathway;apoptosis;biological regulation;biosynthetic process;cell death;cell surfa…	adenyl nucleotide binding;adenyl ribonucleotide binding;ATP binding;binding;catalytic activity;cation binding;ion binding;kinase activity;magnesium ion binding;MAP kinase kinase activity;MAP kinase kinase kinase activity;metal ion binding;molecular transducer activity;nucleotide binding;phosphotransferase activity, alcohol group as acceptor;protein binding;protein kinase activity;protein serine/t…	Ada2/Gcn5/Ada3 transcription activator complex;cell part;cytoplasm;cytoplasmic part;cytosol;endosomal part;endosome membrane;histone acetyltransferase complex;intracellular membrane-bounded organelle;intracellular organelle;intracellular organelle part;intracellular part;macromolecular complex;membrane;membrane-bounded organelle;nuclear part;nucleoplasm;nucleoplasm part;nucleus;organelle;organell…	Adherens junction;Leishmaniasis;MAPK signaling pathway;Measles;NOD-like receptor signaling pathway;Osteoclast differentiation;RIG-I-like receptor signaling pathway;T cell receptor signaling pathway;Toll-like receptor signaling pathway;Toxoplasmosis;Wnt signaling pathway	G protein-coupled receptor kinase 1 substrate motif;GSK3 kinase substrate motif;PAK2 kinase substrate motif;PKA kinase substrate motif;PKC kinase substrate motif		1	1.1e-05	97.273	392380000	245170000	147210000	389	64.1255
0.258391	-0.0717183	-1.1116	-0.833663	0.689126	-0.326716	0.028403	-0.0530293	-0.904872	-0.605348	-1.0977	-0.327719	-1.18132	-0.885953	0.672724	-0.347208	0.027727	-0.961628	-0.643317	0.193975	-0.381	-0.443878	-1.28439	0.0165356	-0.696989	NaN	-0.0456536	-1.1341	-0.85054	-0.33333	0.030292	-1.11992	S	2	540	___1	activation of immune response;activation of innate immune response;activation of MAPK activity;activation of MAPKK activity;activation of NF-kappaB-inducing kinase activity;activation of protein kinase activity;anatomical structure formation involved in morphogenesis;angiogenesis;antigen receptor-mediated signaling pathway;apoptosis;biological regulation;biosynthetic process;cell death;cell surfa…	adenyl nucleotide binding;adenyl ribonucleotide binding;ATP binding;binding;catalytic activity;cation binding;ion binding;kinase activity;magnesium ion binding;MAP kinase kinase activity;MAP kinase kinase kinase activity;metal ion binding;molecular transducer activity;nucleotide binding;phosphotransferase activity, alcohol group as acceptor;protein binding;protein kinase activity;protein serine/t…	Ada2/Gcn5/Ada3 transcription activator complex;cell part;cytoplasm;cytoplasmic part;cytosol;endosomal part;endosome membrane;histone acetyltransferase complex;intracellular membrane-bounded organelle;intracellular organelle;intracellular organelle part;intracellular part;macromolecular complex;membrane;membrane-bounded organelle;nuclear part;nucleoplasm;nucleoplasm part;nucleus;organelle;organell…	Adherens junction;Leishmaniasis;MAPK signaling pathway;Measles;NOD-like receptor signaling pathway;Osteoclast differentiation;RIG-I-like receptor signaling pathway;T cell receptor signaling pathway;Toll-like receptor signaling pathway;Toxoplasmosis;Wnt signaling pathway	14-3-3 domain binding motif;Aurora-A kinase substrate motif;Calmodulin-dependent protein kinase II substrate motif;Casein kinase II substrate motif;PAK2 kinase substrate motif;Phosphorylase kinase substrate motif;PKA kinase substrate motif;PKC epsilon kinase substrate motif;PKC kinase substrate motif;Pyruvate dehydrogenase kinase substrate motif		1	5.18e-86	170.1	3611200000	2234700000	1376400000	412	65.9262
-0.75612	-1.14264	-0.226352	NaN	-0.307954	-0.371707	-0.638752	-1.36707	-0.14595	-0.0341603	-0.505838	-0.528985	-0.240549	NaN	-0.32727	-0.395022	-0.678817	-0.155104	-0.0363029	-0.624487	-0.314537	-0.686498	NaN	-1.16261	-1.49055	NaN	-1.09126	-0.230934	NaN	-0.379232	-0.651683	-0.516079	S	3	546	___1	assembly of spliceosomal tri-snRNP;cellular component assembly;cellular component assembly at cellular level;cellular component organization;cellular component organization at cellular level;cellular component organization or biogenesis;cellular component organization or biogenesis at cellular level;cellular macromolecular complex assembly;cellular macromolecular complex subunit organization;cell…	binding;identical protein binding;protein binding	Cajal body;cell part;cytoplasm;intracellular membrane-bounded organelle;intracellular organelle;intracellular organelle part;intracellular part;macromolecular complex;membrane-bounded organelle;nuclear body;nuclear part;nuclear speck;nucleoplasm;nucleoplasm part;nucleus;organelle;organelle part;ribonucleoprotein complex;small nuclear ribonucleoprotein complex;spliceosomal complex;U4/U6 x U5 tri-s…	Spliceosome	b-Adrenergic Receptor kinase substrate motif;BARD1 BRCT domain binding motif;Casein kinase I substrate motif;Casein kinase II substrate motif;G protein-coupled receptor kinase 1 substrate motif		1	6.18e-39	131.56	1047500000	535900000	511600000	619	45.6175
-1.15444	-0.606751	-1.97242	-1.27762	0.0186897	-1.07043	0.696118	-1.37747	-2.16917	-0.154732	-0.623798	-1.51779	-2.09614	-1.35775	0.0182449	-1.13757	0.679549	-2.30523	-0.164437	-0.927565	-0.383682	-1.85723	-1.07964	-0.330777	-1.27421	NaN	-0.305394	-2.01235	-1.30348	-1.0921	0.742415	-0.636426	S	2	548;549	___1	biological regulation;regulation of biological process;regulation of cell proliferation;regulation of cellular process	binding;identical protein binding;protein binding;protein dimerization activity;protein heterodimerization activity;protein homodimerization activity	cell part;cytoplasm;cytoplasmic part;intracellular part;perinuclear region of cytoplasm		Casein kinase II substrate motif;Pyruvate dehydrogenase kinase substrate motif		1	1.75e-46	203.11	4382400000	2709100000	1673400000	166	63.3288
-1.19167	-0.576652	-2.37256	NaN	NaN	NaN	-1.07344	-0.492053	-1.43239	-1.81804	-2.77709	NaN	-2.52138	NaN	NaN	NaN	-1.14077	-1.52223	-1.93207	NaN	-1.04855	NaN	NaN	-0.315168	NaN	NaN	-1.0817	-2.4206	NaN	NaN	-1.09517	-2.83331	S	3	556	___1	biological regulation;cell surface receptor linked signaling pathway;cellular process;cellular response to chemical stimulus;cellular response to cytokine stimulus;cellular response to organic substance;cellular response to stimulus;cytokine-mediated signaling pathway;posttranscriptional regulation of gene expression;regulation of biological process;regulation of biosynthetic process;regulation o…	binding;nucleic acid binding;RNA binding;RNA cap binding;translation factor activity, nucleic acid binding;translation initiation factor activity	cell part;cytoplasmic part;cytosol;eukaryotic translation initiation factor 4F complex;intracellular part;macromolecular complex;protein complex	RNA transport;Viral myocarditis	14-3-3 domain binding motif;AMP-activated protein kinase substrate motif;Calmodulin-dependent protein kinase I substrate motif;Calmodulin-dependent protein kinase II substrate motif;Calmodulin-dependent protein kinase IV substrate motif;Casein kinase II substrate motif;HMGCoA Reductase kinase substrate motif;PKA kinase substrate motif;PKC kinase substrate motif;Pyruvate dehydrogenase kinase subst…		0.968464	1.14e-28	119.62	890240000	401640000	488600000	1156	14.8728
-0.511036	0.39744	-0.174064	NaN	0.196888	0.119973	0.0777568	-0.641541	NaN	-0.115709	0.439079	NaN	-0.184982	NaN	0.192201	0.117117	0.075906	NaN	-0.122967	-0.845072	-0.8949	-0.559647	-0.407947	0.00207884	-0.875707	NaN	NaN	-0.177588	NaN	0.127952	0.0829281	0.468281	S	3	556	___1	biological regulation;cell surface receptor linked signaling pathway;cellular process;cellular response to chemical stimulus;cellular response to cytokine stimulus;cellular response to organic substance;cellular response to stimulus;cytokine-mediated signaling pathway;posttranscriptional regulation of gene expression;regulation of biological process;regulation of biosynthetic process;regulation o…	binding;nucleic acid binding;RNA binding;RNA cap binding;translation factor activity, nucleic acid binding;translation initiation factor activity	cell part;cytoplasmic part;cytosol;eukaryotic translation initiation factor 4F complex;intracellular part;macromolecular complex;protein complex	RNA transport;Viral myocarditis	Calmodulin-dependent protein kinase II substrate motif;Chk1 kinase substrate motif;DNA dependent Protein kinase substrate motif;ERK1,2 kinase substrate motif;GSK-3, ERK1, ERK2, CDK5 substrate motif;PKA kinase substrate motif;PKC kinase substrate motif;WW domain binding motif	+	1	0.000118651	128.38	265620000	131810000	133820000	232	45.4885
-0.509168	0.453881	-0.112877	-0.0816053	0.200214	0.0132213	-0.937671	-0.592423	NaN	-0.0652642	-0.123338	NaN	-0.119957	-0.0867239	0.195448	0.0129066	-0.996485	NaN	-0.0693578	-1.14435	-0.545316	-1.19975	-0.331141	0.146025	-2.08722	NaN	-0.761943	-0.115162	-0.0832574	0.0141006	-0.956654	-0.125835	S	3	556	___1	biological regulation;cell surface receptor linked signaling pathway;cellular process;cellular response to chemical stimulus;cellular response to cytokine stimulus;cellular response to organic substance;cellular response to stimulus;cytokine-mediated signaling pathway;posttranscriptional regulation of gene expression;regulation of biological process;regulation of biosynthetic process;regulation o…	binding;nucleic acid binding;RNA binding;RNA cap binding;translation factor activity, nucleic acid binding;translation initiation factor activity	cell part;cytoplasmic part;cytosol;eukaryotic translation initiation factor 4F complex;intracellular part;macromolecular complex;protein complex	RNA transport;Viral myocarditis	ERK1,2 kinase substrate motif;G protein-coupled receptor kinase 1 substrate motif;Growth associated histone HI kinase substrate motif;GSK-3, ERK1, ERK2, CDK5 substrate motif;PKA kinase substrate motif;PKC kinase substrate motif;WW domain binding motif		1	5.72e-10	109.5	2369400000	1378100000	991320000	495	77.1398
-1.37192	-3.35634	-2.09974	-4.85564	-3.35978	-2.12004	-2.586	-1.59312	NaN	-2.00661	-2.26035	NaN	-2.23145	-5.1602	-3.57052	-2.25301	-2.74821	NaN	-2.13247	-1.94663	NaN	-5.45066	-1.68241	-1.54688	-3.45494	NaN	NaN	-2.14225	-4.95394	-2.16296	-2.63835	-2.30611	S	4	565;566	___1	actin cytoskeleton organization;actin filament-based process;cellular component organization;cellular component organization at cellular level;cellular component organization or biogenesis;cellular component organization or biogenesis at cellular level;cellular process;cortical actin cytoskeleton organization;cortical cytoskeleton organization;cytoskeleton organization;organelle organization	structural molecule activity	adherens junction;anchoring junction;cell cortex part;cell junction;cell part;cell-substrate adherens junction;cell-substrate junction;cytoplasmic part;cytoskeletal part;extracellular membrane-bounded organelle;extracellular organelle;extracellular region part;extracellular vesicular exosome;extrinsic to membrane;focal adhesion;intracellular membrane-bounded organelle;intracellular organelle;intr…	Tight junction	Casein kinase I substrate motif;Casein kinase II substrate motif;Cdc2 kinase substrate motif;CDK kinase substrate motif;CDK1,2,4,6 kinase substrate motif;ERK1,2 kinase substrate motif;G protein-coupled receptor kinase 1 substrate motif;Growth associated histone HI kinase substrate motif;GSK-3, ERK1, ERK2, CDK5 substrate motif;WW domain binding motif		0.997018	2.96e-24	121.44	1401600000	319640000	1081900000	598	25.2417
-1.63081	-0.282736	-1.41585	-0.685482	-0.500621	-1.68816	-0.803326	-1.55387	0.397717	-1.21818	-0.96053	0.36111	-1.50466	-0.728477	-0.532021	-1.79405	-0.853713	0.388251	-1.29459	-1.12242	-0.762067	-1.15141	-1.8522	-0.548249	-0.754332	NaN	-1.89918	-1.44451	-0.699359	-1.72234	-0.819588	-0.979975	S	2	1573;4906;565;566;7059;8183	___1	actin cytoskeleton organization;actin filament-based process;anatomical structure formation involved in morphogenesis;anatomical structure morphogenesis;apoptosis;biological regulation;blood circulation;cell communication;cell death;cell junction assembly;cell junction organization;cell part morphogenesis;cell projection morphogenesis;cell projection organization;cell-cell junction assembly;cell-…	1-phosphatidylinositol binding;binding;cytoskeletal protein binding;lipid binding;phosphatidylinositol binding;phospholipid binding;protein binding;spectrin binding;structural constituent of cytoskeleton;structural molecule activity	adherens junction;anchoring junction;axolemma;axon part;cell cortex part;cell junction;cell part;cell projection membrane;cell projection part;cell-cell junction;cell-substrate adherens junction;cell-substrate junction;cortical cytoskeleton;cytoplasm;cytoplasmic part;cytoskeletal part;cytoskeleton;cytosol;extracellular membrane-bounded organelle;extracellular organelle;extracellular region part;e…	Tight junction	Casein kinase II substrate motif;G protein-coupled receptor kinase 1 substrate motif;NIMA kinase substrate motif;PKA kinase substrate motif;PKC kinase substrate motif		0.999968	0.0331327	83.206	1035100000	462570000	572500000	518	45.004
-0.944137	-1.33876	-1.64852	-3.54772	-2.22235	-2.47114	-1.22686	-1.34483	NaN	-1.3643	-2.09277	-3.2519	-1.75192	-3.77024	-2.36174	-2.62613	-1.30381	NaN	-1.44988	-1.43813	-3.77455	-3.80131	-2.06938	-2.12111	-1.38911	NaN	-3.02088	-1.68189	-3.61954	-2.52116	-1.2517	-2.13513	S	2	565;566	___1	actin cytoskeleton organization;actin filament-based process;cellular component organization;cellular component organization at cellular level;cellular component organization or biogenesis;cellular component organization or biogenesis at cellular level;cellular process;cortical actin cytoskeleton organization;cortical cytoskeleton organization;cytoskeleton organization;organelle organization	structural molecule activity	adherens junction;anchoring junction;cell cortex part;cell junction;cell part;cell-substrate adherens junction;cell-substrate junction;cytoplasmic part;cytoskeletal part;extracellular membrane-bounded organelle;extracellular organelle;extracellular region part;extracellular vesicular exosome;extrinsic to membrane;focal adhesion;intracellular membrane-bounded organelle;intracellular organelle;intr…	Tight junction	AMP-activated protein kinase substrate motif;Calmodulin-dependent protein kinase II substrate motif;Casein kinase II substrate motif;Chk1 kinase substrate motif;PKA kinase substrate motif;PKC kinase substrate motif		0.999849	5.78e-13	131.35	1233400000	416610000	816800000	87	38.2426
-1.84226	-2.21273	NaN	NaN	-0.875581	-0.105687	0.142815	-2.5661	NaN	-0.0884462	-0.849198	NaN	NaN	NaN	-0.930501	-0.112316	0.139416	NaN	-0.0939938	NaN	-2.07821	-2.66126	NaN	-3.0839	-1.49691	NaN	NaN	NaN	NaN	-0.107827	0.152314	-0.866389	S	2	567	___1			cell part;cytoplasmic membrane-bounded vesicle;cytoplasmic part;cytoplasmic vesicle;Golgi apparatus;Golgi apparatus part;integral to membrane;intracellular membrane-bounded organelle;intracellular organelle;intracellular organelle part;intracellular part;intrinsic to membrane;membrane;membrane part;membrane-bounded organelle;membrane-bounded vesicle;nuclear part;nucleoplasm;organelle;organelle pa…		b-Adrenergic Receptor kinase substrate motif;Casein kinase II substrate motif;G protein-coupled receptor kinase 1 substrate motif;PKA kinase substrate motif;PKC kinase substrate motif	+	0.974646	2.85e-52	147.08	720600000	305000000	415600000	298	15.8481
1.65656	0.915946	-1.28208	NaN	2.24406	0.167361	1.51315	0.907105	NaN	0.297424	0.735701	NaN	-1.36249	NaN	2.19064	0.163378	1.47714	NaN	0.290345	1.53251	2.32279	0.201063	0.56183	NaN	1.2142	NaN	1.66508	-1.30803	NaN	0.178492	1.61379	0.78463	S	2	572	___1	actin cytoskeleton organization;actin filament organization;actin filament-based movement;actin filament-based process;actin polymerization or depolymerization;biological regulation;cellular component assembly;cellular component movement;cellular component organization;cellular component organization at cellular level;cellular component organization or biogenesis;cellular component organization o…	actin binding;binding;cytoskeletal protein binding;profilin binding;protein binding	actin cytoskeleton;actin filament;cell part;cell projection;cytoplasmic membrane-bounded vesicle;cytoplasmic part;cytoplasmic vesicle;cytoskeletal part;cytoskeleton;cytosol;intracellular membrane-bounded organelle;intracellular non-membrane-bounded organelle;intracellular organelle;intracellular organelle part;intracellular part;macromolecular complex;membrane-bounded organelle;membrane-bounded v…		14-3-3 domain binding motif;Calmodulin-dependent protein kinase II substrate motif;Casein kinase II substrate motif;G protein-coupled receptor kinase 1 substrate motif;GSK3 kinase substrate motif;Phosphorylase kinase substrate motif;PKA kinase substrate motif;PKC kinase substrate motif		0.99996	8.68e-43	149.44	639170000	515990000	123170000	340	44.2323
1.57692	0.567031	-0.511072	0.67727	1.63296	0.645647	1.74369	0.921526	2.20729	0.66236	0.756613	2.28269	-0.543128	0.66115	1.59409	0.63028	1.70219	2.15475	0.646595	0.910878	1.48522	-0.278372	-0.223696	1.17898	0.564052	NaN	1.16279	-0.521418	0.722314	0.688588	1.85966	0.806933	S	2	577;578	___1	associative learning;asymmetric cell division;behavior;biological regulation;cell cycle phase;cell cycle process;cell division;cell surface receptor linked signaling pathway;cellular component organization;cellular component organization at cellular level;cellular component organization or biogenesis;cellular component organization or biogenesis at cellular level;cellular process;cellular respons…	binding;cytoskeletal protein binding;enzyme activator activity;enzyme regulator activity;GDP-dissociation inhibitor activity;GTPase activator activity;GTPase regulator activity;microtubule binding;molecular transducer activity;nucleoside-triphosphatase regulator activity;protein binding;protein complex scaffold;receptor signaling complex scaffold activity;receptor signaling protein activity;signa…	cell junction;cell part;cell projection;cell projection part;centrosome;cytoplasm;cytoplasmic part;cytoskeletal part;dendrite;dendritic spine;intracellular membrane-bounded organelle;intracellular non-membrane-bounded organelle;intracellular organelle;intracellular organelle part;intracellular part;macromolecular complex;membrane;membrane-bounded organelle;microtubule;microtubule organizing cente…		Casein kinase II substrate motif;G protein-coupled receptor kinase 1 substrate motif;MAPKAPK2 kinase substrate motif;PKA kinase substrate motif;PKC kinase substrate motif		0.999999	1.24e-55	170.16	1779000000	1430600000	348400000	288	61.9263
0.327691	-0.61434	-1.97743	-1.92882	-0.0779	-1.69203	-0.342367	0.199132	-1.88842	-0.832307	NaN	0.158496	-2.10146	-2.04981	-0.0827861	-1.79816	-0.363841	-2.00687	-0.884511	-1.19917	-1.58452	-2.96526	-0.778242	0.00623731	-1.11826	NaN	-0.487858	-2.01746	-1.96787	-1.72628	-0.349298	NaN	S	2	585	___1	biological regulation;catabolic process;cell differentiation;cell proliferation;cellular catabolic process;cellular developmental process;cellular metabolic process;cellular nitrogen compound catabolic process;cellular nitrogen compound metabolic process;cellular process;deoxyribonucleoside monophosphate catabolic process;deoxyribonucleoside monophosphate metabolic process;deoxyribonucleotide cat…	catalytic activity;deoxyribonucleoside 5'-monophosphate N-glycosidase activity;hydrolase activity;hydrolase activity, acting on glycosyl bonds;hydrolase activity, hydrolyzing N-glycosyl compounds;nucleoside deoxyribosyltransferase activity;transferase activity;transferase activity, transferring glycosyl groups;transferase activity, transferring pentosyl groups	cell part;cytoplasm;extracellular membrane-bounded organelle;extracellular organelle;extracellular region part;extracellular vesicular exosome;intracellular membrane-bounded organelle;intracellular organelle;intracellular organelle part;intracellular part;membrane-bounded organelle;membrane-bounded vesicle;nuclear part;nucleoplasm;nucleus;organelle;organelle part;vesicle		14-3-3 domain binding motif;b-Adrenergic Receptor kinase substrate motif;Calmodulin-dependent protein kinase II substrate motif;Casein kinase II substrate motif;CLK1 kinase substrate motif;PKA kinase substrate motif;PKC kinase substrate motif		1	0.000278272	117.1	1409700000	767470000	642260000	12	65.4735
NaN	2.46502	-0.79674	0.360304	1.47838	NaN	NaN	NaN	0.163461	0.0489789	-0.126909	0.326708	-0.846714	0.351728	1.44319	NaN	NaN	0.15957	0.0478131	NaN	1.15351	NaN	NaN	NaN	-0.0872467	NaN	0.382694	-0.812869	0.384267	NaN	NaN	-0.129478	S	2	592	___1	biological regulation;negative regulation of biological process;negative regulation of cell communication;negative regulation of cellular process;negative regulation of G-protein coupled receptor protein signaling pathway;negative regulation of response to stimulus;negative regulation of signal transduction;negative regulation of signaling;positive regulation of catalytic activity;positive regula…	enzyme activator activity;enzyme regulator activity;GTPase activator activity;GTPase regulator activity;nucleoside-triphosphatase regulator activity	axon part;axon terminus;cell body;cell part;cell projection;cell projection part;cytoplasm;dendritic spine;intracellular membrane-bounded organelle;intracellular organelle;intracellular part;membrane;membrane-bounded organelle;neuron projection;neuron projection terminus;neuron spine;neuronal cell body;nucleus;organelle;plasma membrane		G protein-coupled receptor kinase 1 substrate motif;PKA kinase substrate motif;PKC kinase substrate motif		0.999699	0.00650324	72.275	324280000	223790000	100490000	10	35.2102
0.273295	1.03257	1.07303	0.461172	0.256516	1.49978	0.967827	0.760401	0.340348	0.752281	1.31914	0.906357	1.0475	0.450196	0.25041	1.46408	0.944792	0.332247	0.734375	NaN	0.800043	1.88322	1.03997	0.427534	0.991644	1.28089	0.775125	1.1444	0.491844	1.59953	1.03219	1.40687	S	3	607	___1	biological regulation;biosynthetic process;cellular biosynthetic process;cellular macromolecule biosynthetic process;cellular macromolecule metabolic process;cellular metabolic process;cellular nitrogen compound metabolic process;cellular process;macromolecule biosynthetic process;macromolecule metabolic process;metabolic process;nitrogen compound metabolic process;nucleic acid metabolic process;…	binding;nucleotide binding	cell part;intracellular membrane-bounded organelle;intracellular organelle;intracellular organelle part;intracellular part;membrane-bounded organelle;nuclear part;nucleoplasm;nucleus;organelle;organelle part		Casein kinase I substrate motif;Casein kinase II substrate motif;G protein-coupled receptor kinase 1 substrate motif;PKA kinase substrate motif;PKC kinase substrate motif		1	2.05e-74	181.85	2420000000	1752100000	667860000	579	64.5215
-0.843376	0.287347	1.14881	0.119925	-0.467853	0.583307	-0.296499	-0.398431	NaN	-0.163622	0.350413	NaN	1.12146	0.117071	-0.497198	0.569424	-0.315097	NaN	-0.173885	-0.0254768	-0.293403	0.436857	NaN	-0.0908859	NaN	NaN	-0.179726	1.22521	0.127901	0.622101	-0.302502	0.373718	S	3	607	___1	biological regulation;biosynthetic process;cellular biosynthetic process;cellular macromolecule biosynthetic process;cellular macromolecule metabolic process;cellular metabolic process;cellular nitrogen compound metabolic process;cellular process;macromolecule biosynthetic process;macromolecule metabolic process;metabolic process;nitrogen compound metabolic process;nucleic acid metabolic process;…	binding;nucleotide binding	cell part;intracellular membrane-bounded organelle;intracellular organelle;intracellular organelle part;intracellular part;membrane-bounded organelle;nuclear part;nucleoplasm;nucleus;organelle;organelle part		b-Adrenergic Receptor kinase substrate motif;Casein kinase I substrate motif;Cdc2 kinase substrate motif;CDK kinase substrate motif;CDK1,2,4,6 kinase substrate motif;ERK1,2 kinase substrate motif;Growth associated histone HI kinase substrate motif;GSK-3, ERK1, ERK2, CDK5 substrate motif;MAPKAPK2 kinase substrate motif;PKA kinase substrate motif;PKC kinase substrate motif;WW domain binding motif		0.999982	1.51e-74	199.94	511260000	333660000	177590000	498	47.4745
0.635753	1.42827	1.35893	1.06525	0.636864	1.39305	1.06974	1.08478	NaN	NaN	1.84415	0.974622	1.32658	1.0399	0.621706	1.35989	1.04428	NaN	NaN	0.917235	1.15125	1.42933	1.39046	0.556011	1.38842	NaN	1.13337	1.44931	1.1361	1.48569	1.14088	1.9668	S	3	607	___1	biological regulation;biosynthetic process;cellular biosynthetic process;cellular macromolecule biosynthetic process;cellular macromolecule metabolic process;cellular metabolic process;cellular nitrogen compound metabolic process;cellular process;macromolecule biosynthetic process;macromolecule metabolic process;metabolic process;nitrogen compound metabolic process;nucleic acid metabolic process;…	binding;nucleotide binding	cell part;intracellular membrane-bounded organelle;intracellular organelle;intracellular organelle part;intracellular part;membrane-bounded organelle;nuclear part;nucleoplasm;nucleus;organelle;organelle part		Casein kinase II substrate motif;Cdc2 kinase substrate motif;CDK kinase substrate motif;CDK1,2,4,6 kinase substrate motif;ERK1,2 kinase substrate motif;Growth associated histone HI kinase substrate motif;GSK-3, ERK1, ERK2, CDK5 substrate motif;MDC1 BRCT domain binding motif;PKA kinase substrate motif;PKC kinase substrate motif;Plk1 PBD domain binding motif;WW domain binding motif		0.922157	3.78e-50	123.12	4694400000	3663900000	1030600000	453	10.7359
0.593453	1.39076	NaN	NaN	0.534341	1.25342	1.0849	0.740838	NaN	0.993805	1.5153	NaN	NaN	NaN	0.521623	1.22359	1.05908	NaN	0.970151	0.703779	0.966752	1.45614	1.3269	0.439422	1.32364	NaN	NaN	NaN	NaN	1.33678	1.15705	1.61608	S	3	607	___1	biological regulation;biosynthetic process;cellular biosynthetic process;cellular macromolecule biosynthetic process;cellular macromolecule metabolic process;cellular metabolic process;cellular nitrogen compound metabolic process;cellular process;macromolecule biosynthetic process;macromolecule metabolic process;metabolic process;nitrogen compound metabolic process;nucleic acid metabolic process;…	binding;nucleotide binding	cell part;intracellular membrane-bounded organelle;intracellular organelle;intracellular organelle part;intracellular part;membrane-bounded organelle;nuclear part;nucleoplasm;nucleus;organelle;organelle part		b-Adrenergic Receptor kinase substrate motif		1	5.75e-167	219.27	3428800000	2564800000	864000000	676	48.5972
0.452381	1.00272	1.36388	1.50972	0.338642	0.946478	0.756007	0.444359	NaN	0.797338	1.29834	0.941079	1.33142	1.47378	0.330582	0.92395	0.738013	NaN	0.77836	NaN	0.745216	1.30286	1.167	-0.246739	0.936424	NaN	1.10441	1.45459	1.61012	1.00943	0.806287	1.38469	S	3	607	___1	biological regulation;biosynthetic process;cellular biosynthetic process;cellular macromolecule biosynthetic process;cellular macromolecule metabolic process;cellular metabolic process;cellular nitrogen compound metabolic process;cellular process;macromolecule biosynthetic process;macromolecule metabolic process;metabolic process;nitrogen compound metabolic process;nucleic acid metabolic process;…	binding;nucleotide binding	cell part;intracellular membrane-bounded organelle;intracellular organelle;intracellular organelle part;intracellular part;membrane-bounded organelle;nuclear part;nucleoplasm;nucleus;organelle;organelle part		b-Adrenergic Receptor kinase substrate motif;Casein kinase I substrate motif;Casein kinase II substrate motif		1	6.38e-154	244.04	4876100000	3534400000	1341700000	642	105.673
-0.637925	-1.62566	-2.70762	-2.0812	-0.672864	-2.88696	-0.548645	-1.1707	-2.6397	-2.96494	-3.57348	-1.39257	-2.87745	-2.21174	-0.715068	-3.06804	-0.583057	-2.80527	-3.15091	-0.946479	-0.567738	-1.32126	-1.42374	-0.0681821	-1.7572	NaN	0.441989	-2.76244	-2.12333	-2.94541	-0.559752	-3.64582	S	2	2868;614	___1	biological regulation;cell cycle;cell cycle phase;cell cycle process;cell division;cell surface receptor linked signaling pathway;cellular component organization;cellular component organization at cellular level;cellular component organization or biogenesis;cellular component organization or biogenesis at cellular level;cellular process;cellular response to stimulus;dopamine receptor signaling pa…	binding;channel inhibitor activity;channel regulator activity;enzyme binding;enzyme inhibitor activity;enzyme regulator activity;ion channel inhibitor activity;phosphatase binding;phosphatase inhibitor activity;phosphatase regulator activity;potassium channel inhibitor activity;potassium channel regulator activity;protein binding;protein phosphatase 2A binding;protein phosphatase binding;protein …	cell part;cytoplasm;intracellular organelle part;intracellular part;nuclear part;nucleoplasm;organelle part		b-Adrenergic Receptor kinase substrate motif;Casein kinase II substrate motif;PKA kinase substrate motif	+	1	1.06e-09	120.9	4031600000	1834600000	2197100000	67	70.1094
-0.680495	-0.28729	0.317518	0.0681658	-0.594692	-0.558942	-0.407983	-0.36655	-0.388549	-0.349014	-0.543863	-0.314824	0.309961	0.0665434	-0.631993	-0.594001	-0.433573	-0.41292	-0.370905	-0.15481	-0.48916	0.0960861	-0.317256	-0.690509	-0.41936	NaN	-0.615031	0.338635	0.0726994	-0.570257	-0.416242	-0.554873	S	2	624	___1	biological regulation;cell cycle phase;cell cycle process;cellular component organization;cellular component organization at cellular level;cellular component organization or biogenesis;cellular component organization or biogenesis at cellular level;cellular macromolecule metabolic process;cellular metabolic process;cellular nitrogen compound metabolic process;cellular process;cellular response t…	binding;cation binding;DNA binding;double-stranded DNA binding;ion binding;metal ion binding;nucleic acid binding;structure-specific DNA binding;transition metal ion binding;zinc ion binding	cell part;chromosome;condensed chromosome;cytoplasmic part;female pronucleus;Golgi apparatus;intracellular membrane-bounded organelle;intracellular non-membrane-bounded organelle;intracellular organelle;intracellular organelle part;intracellular part;membrane;membrane-bounded organelle;mitochondrion;non-membrane-bounded organelle;nuclear matrix;nuclear part;nucleoplasm;nucleus;organelle;organelle…		Casein kinase I substrate motif;Casein kinase II substrate motif		1	6.33e-93	194.24	888770000	473640000	415140000	339	85.9369
0.0380742	-0.750144	-1.3371	NaN	0.434005	-1.25611	-0.26033	-0.591378	0.526331	-0.830978	-1.61248	-0.253498	-1.42096	NaN	0.423675	-1.3349	-0.276659	0.513803	-0.8831	-0.445001	-0.887762	-1.24235	-2.38417	-1.05899	-0.906228	NaN	NaN	-1.36416	NaN	-1.28154	-0.265601	-1.64513	S	2	630	___1	biological regulation;cell migration;cell motility;cell proliferation;cellular component movement;cellular component organization;cellular component organization or biogenesis;cellular process;locomotion;macromolecule metabolic process;metabolic process;neuromuscular junction development;positive regulation of biological process;positive regulation of catabolic process;positive regulation of cell…	binding;catalytic activity;cation binding;endopeptidase activity;epidermal growth factor binding;growth factor binding;hormone binding;hydrolase activity;ion binding;metal ion binding;metalloendopeptidase activity;metallopeptidase activity;peptidase activity;peptidase activity, acting on L-amino acid peptides;protein binding	cell part;cell surface;cytoplasmic part;cytosol;intracellular part		14-3-3 domain binding motif;Aurora-A kinase substrate motif;Calmodulin-dependent protein kinase II substrate motif;Casein kinase II substrate motif;G protein-coupled receptor kinase 1 substrate motif;PAK2 kinase substrate motif;Phosphorylase kinase substrate motif;PKA kinase substrate motif;PKC epsilon kinase substrate motif;PKC kinase substrate motif		0.997731	2.11e-12	108.75	3379600000	1898800000	1480800000	94	26.4318
-0.486918	-0.359614	-0.11755	NaN	-0.636097	0.0662452	-0.52791	-0.455156	0.0469554	-0.282555	-0.37713	-0.904289	-0.124923	NaN	-0.675995	0.0646684	-0.561023	0.0458378	-0.300278	-0.215935	-0.233053	-0.11496	-0.279126	-0.584812	-0.467176	NaN	NaN	-0.11993	NaN	0.0706509	-0.538597	-0.384764	S	3	645	___1	cellular macromolecule metabolic process;cellular metabolic process;cellular nitrogen compound metabolic process;cellular process;macromolecule metabolic process;metabolic process;mRNA metabolic process;mRNA processing;nitrogen compound metabolic process;nuclear mRNA splicing, via spliceosome;nucleic acid metabolic process;nucleobase-containing compound metabolic process;primary metabolic process…	adenyl nucleotide binding;adenyl ribonucleotide binding;ATP binding;ATPase activity;ATPase activity, coupled;ATP-dependent helicase activity;ATP-dependent RNA helicase activity;binding;catalytic activity;helicase activity;hydrolase activity;hydrolase activity, acting on acid anhydrides;hydrolase activity, acting on acid anhydrides, in phosphorus-containing anhydrides;nucleoside-triphosphatase act…	cell part;cytoplasm;intracellular membrane-bounded organelle;intracellular organelle;intracellular organelle part;intracellular part;macromolecular complex;membrane-bounded organelle;nuclear part;nucleoplasm;nucleus;organelle;organelle part;ribonucleoprotein complex;spliceosomal complex	Spliceosome	b-Adrenergic Receptor kinase substrate motif;BARD1 BRCT domain binding motif;Casein kinase II substrate motif;G protein-coupled receptor kinase 1 substrate motif;PKA kinase substrate motif;PKC kinase substrate motif		1	3.55e-16	122.49	1003200000	572140000	431050000	160	64.6147
NaN	0.900669	1.56383	1.07932	1.20863	2.30973	0.927686	0.576516	1.85548	2.03137	1.36819	NaN	1.52661	1.05363	1.17986	2.25475	0.905606	1.81132	1.98302	1.16252	0.506838	0.78847	1.92711	0.79176	1.32712	NaN	1.65291	1.66784	1.1511	2.46334	0.989384	1.45919	S	2	648	___1	biological regulation;catabolic process;cellular catabolic process;cellular macromolecule catabolic process;cellular macromolecule metabolic process;cellular metabolic process;cellular process;cellular protein catabolic process;cellular protein metabolic process;defense response;defense response to virus;immune effector process;immune system process;macromolecule catabolic process;macromolecule m…	binding;identical protein binding;lamin binding;protein binding;protein dimerization activity;protein heterodimerization activity;protein homodimerization activity	cell part;cytoplasmic part;endoplasmic reticulum;envelope;integral to membrane;intracellular membrane-bounded organelle;intracellular organelle;intracellular organelle part;intracellular part;intrinsic to membrane;membrane;membrane part;membrane-bounded organelle;mitochondrial membrane;mitochondrial outer membrane;mitochondrial part;mitochondrion;nuclear envelope;nuclear part;organelle;organelle …		14-3-3 domain binding motif;Calmodulin-dependent protein kinase II substrate motif;Casein kinase II substrate motif;Phosphorylase kinase substrate motif;PKA kinase substrate motif;PKC kinase substrate motif		0.999506	0.00193849	94.309	545430000	432200000	113230000	126	35.7903
0.150933	-0.171189	0.767596	0.673607	NaN	0.669692	-0.0322759	NaN	NaN	1.18537	0.517809	3.22754	0.749326	0.657574	NaN	0.653752	-0.0343004	NaN	1.15716	0.626631	NaN	0.125589	-0.0203561	0.246062	-0.265996	NaN	NaN	0.818646	0.718406	0.714231	-0.0329293	0.552247	S	2	649	___1	androgen receptor signaling pathway;biological regulation;biosynthetic process;cellular biosynthetic process;cellular macromolecule metabolic process;cellular metabolic process;cellular nitrogen compound metabolic process;cellular process;cellular response to stimulus;developmental process;gene expression;intracellular receptor mediated signaling pathway;macromolecule metabolic process;metabolic …	binding;hormone receptor binding;ligand-dependent nuclear receptor transcription coactivator activity;nuclear hormone receptor binding;protein binding;protein binding transcription factor activity;receptor activity;receptor binding;RNA polymerase II transcription cofactor activity;RNA polymerase II transcription factor binding transcription factor activity;thyroid hormone receptor binding;transcr…	cell part;intracellular membrane-bounded organelle;intracellular organelle;intracellular organelle part;intracellular part;macromolecular complex;mediator complex;membrane;membrane-bounded organelle;nuclear part;nucleoplasm;nucleoplasm part;nucleus;organelle;organelle part;protein complex		14-3-3 domain binding motif;Calmodulin-dependent protein kinase II substrate motif;Pim1 kinase substrate sequence;PKA kinase substrate motif;PKA, PKG kinase substrate motif;PKC epsilon kinase substrate motif;PKC kinase substrate motif;PKG kinase substrate motif		1	4.46e-11	135.08	624300000	411480000	212820000	617	76.9512
-0.516162	0.149336	NaN	NaN	-0.528455	-0.309735	0.0585031	0.35217	-0.154077	-0.406705	0.524641	-0.538073	NaN	NaN	-0.561601	-0.329162	0.0571106	-0.163742	-0.432215	0.151581	-0.421984	0.824896	0.214667	NaN	-0.621729	NaN	NaN	NaN	NaN	-0.316005	0.062394	0.559534	S	4	649	___1	androgen receptor signaling pathway;biological regulation;biosynthetic process;cellular biosynthetic process;cellular macromolecule metabolic process;cellular metabolic process;cellular nitrogen compound metabolic process;cellular process;cellular response to stimulus;developmental process;gene expression;intracellular receptor mediated signaling pathway;macromolecule metabolic process;metabolic …	binding;hormone receptor binding;ligand-dependent nuclear receptor transcription coactivator activity;nuclear hormone receptor binding;protein binding;protein binding transcription factor activity;receptor activity;receptor binding;RNA polymerase II transcription cofactor activity;RNA polymerase II transcription factor binding transcription factor activity;thyroid hormone receptor binding;transcr…	cell part;intracellular membrane-bounded organelle;intracellular organelle;intracellular organelle part;intracellular part;macromolecular complex;mediator complex;membrane;membrane-bounded organelle;nuclear part;nucleoplasm;nucleoplasm part;nucleus;organelle;organelle part;protein complex		ERK1,2 kinase substrate motif;Growth associated histone HI kinase substrate motif;GSK-3, ERK1, ERK2, CDK5 substrate motif;PKA kinase substrate motif;PKC kinase substrate motif;WW domain binding motif		0.888524	3.22e-30	102.31	881660000	504620000	377050000	1144	9.01986
0.473711	0.125391	1.53202	0.198439	0.017234	0.466871	0.878328	0.599055	0.409015	1.22715	0.669327	0.601752	1.49555	0.193715	0.0168238	0.455759	0.857423	0.399279	1.19794	NaN	0.414272	-0.402968	1.09179	0.54921	1.12523	NaN	NaN	1.63391	0.211636	0.497921	0.936743	0.713842	S	2	659	___1	cellular macromolecule metabolic process;cellular metabolic process;cellular nitrogen compound metabolic process;cellular process;macromolecule metabolic process;metabolic process;nitrogen compound metabolic process;nucleic acid metabolic process;nucleobase-containing compound metabolic process;primary metabolic process;RNA metabolic process;RNA processing	binding;cation binding;ion binding;metal ion binding	cell part;extracellular region part;extracellular space;intracellular		14-3-3 domain binding motif;AMP-activated protein kinase substrate motif;Calmodulin-dependent protein kinase I substrate motif;Calmodulin-dependent protein kinase II substrate motif;Calmodulin-dependent protein kinase IV substrate motif;Casein kinase II substrate motif;Chk1 kinase substrate motif;PAK2 kinase substrate motif;PKA kinase substrate motif;PKC epsilon kinase substrate motif;PKC kinase …		0.966087	1.56e-38	190.41	904430000	619990000	284440000	352	14.8309
0.051778	1.09554	2.42548	2.44786	0.76771	NaN	1.21887	0.745798	0.837825	1.87166	2.61384	1.94594	2.36775	2.3896	0.749437	NaN	1.18986	0.817884	1.82711	0.933769	1.31004	2.49691	0.986738	0.74296	NaN	NaN	1.23016	2.5868	2.61066	NaN	1.29993	2.78768	S	3	676	___1	cellular component organization;cellular component organization or biogenesis;cellular membrane organization;cellular process;defense response;endocytosis;establishment of localization;immune response;immune system process;inflammatory response;membrane invagination;membrane organization;response to stimulus;response to stress;response to wounding;transport;vesicle-mediated transport	binding;carbohydrate binding;receptor activity	cell part;extracellular membrane-bounded organelle;extracellular organelle;extracellular region part;extracellular vesicular exosome;integral to membrane;integral to plasma membrane;intrinsic to membrane;intrinsic to plasma membrane;membrane part;membrane-bounded organelle;membrane-bounded vesicle;organelle;plasma membrane part;vesicle		Casein kinase II substrate motif;G protein-coupled receptor kinase 1 substrate motif;MDC1 BRCT domain binding motif;PKA kinase substrate motif;PKC kinase substrate motif;Plk1 PBD domain binding motif		0.809227	4.27e-09	120.57	527980000	412770000	115210000	1703	6.27553
-0.284569	0.14937	0.0305627	0.62075	0.168324	0.891318	0.685192	-0.607106	0.241885	0.694818	-0.28098	-1.03547	0.0298353	0.605975	0.164318	0.870103	0.668883	0.236128	0.67828	-0.578409	-0.134408	0.0635245	0.0422497	-0.819076	-0.225192	-0.255337	0.0954413	0.0325954	0.662034	0.950596	0.730762	-0.286668	S	2	723	___1	alcohol metabolic process;biosynthetic process;carbohydrate biosynthetic process;carbohydrate metabolic process;cellular biosynthetic process;cellular carbohydrate metabolic process;cellular lipid metabolic process;cellular macromolecule metabolic process;cellular metabolic process;cellular nitrogen compound metabolic process;cellular process;cellular protein metabolic process;C-terminal protein …	alcohol binding;binding;carbohydrate binding;catalytic activity;dolichyl-phosphate beta-D-mannosyltransferase activity;dolichyl-phosphate-mannose-protein mannosyltransferase activity;mannose binding;mannosyltransferase activity;monosaccharide binding;sugar binding;transferase activity;transferase activity, transferring glycosyl groups;transferase activity, transferring hexosyl groups	cell part;cytoplasmic part;dolichol-phosphate-mannose synthase complex;endoplasmic reticulum;endoplasmic reticulum membrane;endoplasmic reticulum part;intracellular membrane-bounded organelle;intracellular organelle;intracellular organelle part;intracellular part;macromolecular complex;mannosyltransferase complex;membrane;membrane part;membrane-bounded organelle;nucleus;organelle;organelle membra…	N-Glycan biosynthesis	Cdc2 kinase substrate motif;CDK kinase substrate motif;CDK1,2,4,6 kinase substrate motif;ERK1,2 kinase substrate motif;G protein-coupled receptor kinase 1 substrate motif;Growth associated histone HI kinase substrate motif;GSK3 kinase substrate motif;GSK-3, ERK1, ERK2, CDK5 substrate motif;PKA kinase substrate motif;PKC kinase substrate motif;WW domain binding motif	+	0.999379	1.57e-29	181.77	10039000000	6491200000	3547500000	9	32.0644
1.7565	-0.306107	-0.7997	0.475111	2.56462	0.396364	2.37276	2.4413	NaN	NaN	NaN	NaN	-0.849859	0.463803	2.50358	0.38693	2.31629	NaN	NaN	3.52728	2.72246	-0.496536	1.71603	NaN	2.79057	NaN	NaN	-0.815889	0.50671	0.422725	2.53057	NaN	S	2	727	___1	alcohol catabolic process;alcohol metabolic process;biological regulation;carbohydrate catabolic process;carbohydrate metabolic process;carbohydrate phosphorylation;carboxylic acid metabolic process;catabolic process;cellular carbohydrate catabolic process;cellular carbohydrate metabolic process;cellular ketone metabolic process;cellular metabolic process;cellular process;fructose 2,6-bisphosphat…	6-phosphofructo-2-kinase activity;adenyl nucleotide binding;adenyl ribonucleotide binding;ATP binding;binding;carbohydrate kinase activity;carbohydrate phosphatase activity;catalytic activity;enzyme binding;fructose-2,6-bisphosphate 2-phosphatase activity;hydrolase activity;hydrolase activity, acting on ester bonds;kinase activity;kinase binding;nucleotide binding;phosphatase activity;phosphofruc…	cell part;cytoplasmic part;cytosol;intracellular part	Fructose and mannose metabolism	14-3-3 domain binding motif;Akt kinase substrate motif;AMP-activated protein kinase substrate motif;Calmodulin-dependent protein kinase II substrate motif;Casein kinase II substrate motif;HMGCoA Reductase kinase substrate motif;MAPKAPK1 kinase substrate motif;PAK2 kinase substrate motif;PKA kinase substrate motif;PKC epsilon kinase substrate motif;PKC kinase substrate motif		0.993298	1.09e-09	91.401	335110000	291130000	43972000	466	22.2035
0.0461747	0.441741	1.37801	0.332661	-0.677231	-0.124061	-0.220011	0.61918	NaN	0.446802	0.478933	0.439887	1.34521	0.324743	-0.719709	-0.131843	-0.23381	NaN	0.436168	0.430314	0.686944	1.01024	0.413777	0.337624	0.618354	NaN	0.668272	1.46966	0.354786	-0.126573	-0.224465	0.510786	S	2	732	___1	anatomical structure homeostasis;biological regulation;biosynthetic process;box H/ACA snoRNA 3'-end processing;box H/ACA snoRNA metabolic process;box H/ACA snoRNA processing;cell proliferation;cellular biosynthetic process;cellular component organization;cellular component organization at cellular level;cellular component organization or biogenesis;cellular component organization or biogenesis at…	binding;catalytic activity;DNA polymerase activity;intramolecular transferase activity;isomerase activity;nucleic acid binding;nucleotidyltransferase activity;pseudouridine synthase activity;RNA binding;RNA-directed DNA polymerase activity;telomerase activity;transferase activity;transferase activity, transferring phosphorus-containing groups	box H/ACA RNP complex;box H/ACA snoRNP complex;Cajal body;cell part;cytoplasm;intracellular membrane-bounded organelle;intracellular non-membrane-bounded organelle;intracellular organelle;intracellular organelle part;intracellular part;macromolecular complex;membrane-bounded organelle;non-membrane-bounded organelle;nuclear body;nuclear part;nucleolar part;nucleolus;nucleoplasm;nucleoplasm part;nu…	Ribosome biogenesis in eukaryotes	b-Adrenergic Receptor kinase substrate motif;Casein kinase I substrate motif;Casein kinase II substrate motif		0.943121	5.16e-100	183.85	6020300000	3954500000	2065900000	494	13.0857
-0.212879	0.0854899	1.06275	NaN	NaN	NaN	-0.600875	-0.163004	NaN	-0.198746	0.0793512	NaN	1.03746	NaN	NaN	NaN	-0.638564	NaN	-0.211212	NaN	NaN	0.365539	0.298993	0.000392404	0.0218505	NaN	0.819144	1.13344	NaN	NaN	-0.613039	0.0846286	S	2	732	___1	anatomical structure homeostasis;biological regulation;biosynthetic process;box H/ACA snoRNA 3'-end processing;box H/ACA snoRNA metabolic process;box H/ACA snoRNA processing;cell proliferation;cellular biosynthetic process;cellular component organization;cellular component organization at cellular level;cellular component organization or biogenesis;cellular component organization or biogenesis at…	binding;catalytic activity;DNA polymerase activity;intramolecular transferase activity;isomerase activity;nucleic acid binding;nucleotidyltransferase activity;pseudouridine synthase activity;RNA binding;RNA-directed DNA polymerase activity;telomerase activity;transferase activity;transferase activity, transferring phosphorus-containing groups	box H/ACA RNP complex;box H/ACA snoRNP complex;Cajal body;cell part;cytoplasm;intracellular membrane-bounded organelle;intracellular non-membrane-bounded organelle;intracellular organelle;intracellular organelle part;intracellular part;macromolecular complex;membrane-bounded organelle;non-membrane-bounded organelle;nuclear body;nuclear part;nucleolar part;nucleolus;nucleoplasm;nucleoplasm part;nu…	Ribosome biogenesis in eukaryotes	Casein kinase I substrate motif;G protein-coupled receptor kinase 1 substrate motif		1	3.36e-18	176.09	360530000	219520000	141010000	513	50.7033
-0.408625	-0.0436716	-0.092953	NaN	-0.628809	-1.31003	NaN	-0.621403	NaN	-0.685872	-0.200498	-0.9122	-0.0987834	NaN	-0.66825	-1.3922	NaN	NaN	-0.728892	-1.51073	-0.619382	-0.336774	NaN	-1.21801	-0.891165	NaN	0.161719	-0.0948348	NaN	-1.33655	NaN	-0.204557	S	3	733	___1	biological regulation;biosynthetic process;cellular biosynthetic process;cellular macromolecule biosynthetic process;cellular macromolecule metabolic process;cellular metabolic process;cellular process;cellular protein metabolic process;gene expression;macromolecule biosynthetic process;macromolecule metabolic process;metabolic process;posttranscriptional regulation of gene expression;primary met…	binding;catalytic activity;GTP binding;GTPase activity;guanyl nucleotide binding;guanyl ribonucleotide binding;hydrolase activity;hydrolase activity, acting on acid anhydrides;hydrolase activity, acting on acid anhydrides, in phosphorus-containing anhydrides;nucleic acid binding;nucleoside-triphosphatase activity;nucleotide binding;purine nucleotide binding;purine ribonucleoside triphosphate bind…	cell part;cytoplasm;cytoplasmic part;cytosol;intracellular part	RNA transport	b-Adrenergic Receptor kinase substrate motif;Casein kinase I substrate motif;Casein kinase II substrate motif;G protein-coupled receptor kinase 1 substrate motif		1	8.87e-152	235.69	5480900000	2160800000	3320100000	113	141.567
-0.674965	-0.770813	-0.368308	-0.915079	-0.671602	-1.30286	-2.02055	-0.91571	-0.553945	-0.556174	-0.730462	-2.28382	-0.39141	-0.972476	-0.713727	-1.38458	-2.14728	-0.58869	-0.591059	-1.07123	-1.10214	-0.41671	-0.645768	-1.24918	-1.01913	NaN	-1.23184	-0.375764	-0.933604	-1.32923	-2.06145	-0.745249	S	2	733	___1	biological regulation;biosynthetic process;cellular biosynthetic process;cellular macromolecule biosynthetic process;cellular macromolecule metabolic process;cellular metabolic process;cellular process;cellular protein metabolic process;gene expression;macromolecule biosynthetic process;macromolecule metabolic process;metabolic process;posttranscriptional regulation of gene expression;primary met…	binding;catalytic activity;GTP binding;GTPase activity;guanyl nucleotide binding;guanyl ribonucleotide binding;hydrolase activity;hydrolase activity, acting on acid anhydrides;hydrolase activity, acting on acid anhydrides, in phosphorus-containing anhydrides;nucleic acid binding;nucleoside-triphosphatase activity;nucleotide binding;purine nucleotide binding;purine ribonucleoside triphosphate bind…	cell part;cytoplasm;cytoplasmic part;cytosol;intracellular part	RNA transport	Casein kinase II substrate motif;G protein-coupled receptor kinase 1 substrate motif;PKA kinase substrate motif;Pyruvate dehydrogenase kinase substrate motif		1	1.59e-106	240.34	3194000000	1511200000	1682800000	164	75.3206
-0.382262	-0.610972	-0.384679	-1.02733	-0.485555	-1.27162	-0.937479	-0.983154	-0.527505	-0.908811	-0.735686	-0.716363	-0.408807	-1.09177	-0.51601	-1.35138	-0.996281	-0.560592	-0.965815	-1.17541	-0.963447	-0.570174	-0.850362	-1.3486	-1.23788	NaN	-1.30395	-0.392466	-1.04813	-1.29736	-0.956458	-0.750579	S	3	733	___1	biological regulation;biosynthetic process;cellular biosynthetic process;cellular macromolecule biosynthetic process;cellular macromolecule metabolic process;cellular metabolic process;cellular process;cellular protein metabolic process;gene expression;macromolecule biosynthetic process;macromolecule metabolic process;metabolic process;posttranscriptional regulation of gene expression;primary met…	binding;catalytic activity;GTP binding;GTPase activity;guanyl nucleotide binding;guanyl ribonucleotide binding;hydrolase activity;hydrolase activity, acting on acid anhydrides;hydrolase activity, acting on acid anhydrides, in phosphorus-containing anhydrides;nucleic acid binding;nucleoside-triphosphatase activity;nucleotide binding;purine nucleotide binding;purine ribonucleoside triphosphate bind…	cell part;cytoplasm;cytoplasmic part;cytosol;intracellular part	RNA transport	b-Adrenergic Receptor kinase substrate motif;Casein kinase II substrate motif		1	2.46e-88	185.96	8829700000	4219700000	4610000000	214	82.2623
0.172895	1.16742	0.679424	-0.266486	0.362244	0.177086	0.185294	1.09777	1.01146	0.045614	0.493	1.38766	0.663253	-0.283201	0.353622	0.172871	0.180883	0.987384	0.0445284	1.02122	0.50133	0.942211	1.21433	0.519299	0.945709	NaN	0.637725	0.72461	-0.271881	0.188864	0.197617	0.525788	S	2	741	___1	biological regulation;biosynthetic process;cell cycle process;cell proliferation;cellular biosynthetic process;cellular component organization;cellular component organization at cellular level;cellular component organization or biogenesis;cellular component organization or biogenesis at cellular level;cellular macromolecule biosynthetic process;cellular macromolecule metabolic process;cellular me…	binding;chromatin binding;DNA binding;histone acetyl-lysine binding;histone binding;nucleic acid binding;p53 binding;protein binding	carboxy-terminal domain protein kinase complex;cell part;chromatin;chromosomal part;chromosome;condensed chromosome;condensed nuclear chromosome;cytoplasm;intracellular membrane-bounded organelle;intracellular non-membrane-bounded organelle;intracellular organelle;intracellular organelle part;intracellular part;macromolecular complex;membrane-bounded organelle;non-membrane-bounded organelle;nucle…		ERK1,2 kinase substrate motif;GSK-3, ERK1, ERK2, CDK5 substrate motif;PKA kinase substrate motif;PKC kinase substrate motif;WW domain binding motif		1	0.00068618	137.14	1503900000	1074900000	428940000	1117	78.1489
3.39531	NaN	NaN	6.94354	2.205	4.34505	4.34354	5.05456	NaN	6.36048	2.64591	3.56837	NaN	6.77827	2.15252	4.24163	4.24016	NaN	6.20909	2.61782	5.94169	NaN	NaN	2.56846	3.38529	NaN	NaN	NaN	7.40533	4.63402	4.63242	2.82188	S	3	753;754	___1	biological regulation;cell surface receptor linked signaling pathway;cellular process;cellular response to stimulus;defense response;immune system process;negative regulation of biological process;negative regulation of cell differentiation;negative regulation of cellular process;negative regulation of developmental process;negative regulation of myeloid cell differentiation;negative regulation o…	molecular transducer activity;receptor activity;signal transducer activity;signaling receptor activity;transmembrane signaling receptor activity	cell part;integral to membrane;integral to plasma membrane;intrinsic to membrane;intrinsic to plasma membrane;membrane part;plasma membrane part		14-3-3 domain binding motif;Calmodulin-dependent protein kinase II substrate motif;Calmodulin-dependent protein kinase IV substrate motif;Chk1 kinase substrate motif;ERK1,2 kinase substrate motif;GSK-3, ERK1, ERK2, CDK5 substrate motif;MDC1 BRCT domain binding motif;PAK2 kinase substrate motif;PKA kinase substrate motif;PKC epsilon kinase substrate motif;PKC kinase substrate motif;Plk1 PBD domain…		1	6.24e-178	273.94	3282100000	3206700000	75381000	503	109.814
0.523757	-0.821163	-2.04944	-0.635014	0.828741	-0.287475	0.949915	0.472434	NaN	-0.500632	0.663963	-0.333265	-2.17798	-0.674844	0.809016	-0.305507	0.927306	NaN	-0.532033	0.112263	-0.247286	-0.829309	-0.419395	0.0719	-0.282703	NaN	0.0611436	-2.09093	-0.647869	-0.293295	1.01309	0.708121	S	3	766	___1	biological regulation;cellular process;cellular response to abiotic stimulus;cellular response to light stimulus;cellular response to radiation;cellular response to stimulus;cellular response to UV;negative regulation of biological process;negative regulation of catabolic process;negative regulation of cellular catabolic process;negative regulation of cellular metabolic process;negative regulatio…		cell part;intracellular non-membrane-bounded organelle;intracellular organelle;intracellular organelle part;intracellular part;non-membrane-bounded organelle;nuclear body;nuclear part;nucleolus;nucleoplasm part;organelle;organelle part;PML body		Casein kinase II substrate motif;Phosphorylase kinase substrate motif;PKA kinase substrate motif;PKC kinase substrate motif		1	1.47e-44	140.2	944130000	578440000	365690000	300	67.8773
0.234726	-0.674751	-1.3772	-0.57071	0.28307	-1.08744	0.0871743	-0.234251	-0.717122	-0.917138	-1.47248	-0.866396	-1.46358	-0.606507	0.276333	-1.15564	0.0850994	-0.762102	-0.974664	-0.506146	-0.490788	-1.05413	-0.670681	-0.824417	-1.09552	NaN	NaN	-1.40508	-0.582264	-1.10945	0.092972	-1.50229	S	2	768;769	___1	axon guidance;biological regulation;cell cycle;cell cycle phase;cell cycle process;cell division;cellular component organization;cellular component organization at cellular level;cellular component organization or biogenesis;cellular component organization or biogenesis at cellular level;cellular process;cellular response to stimulus;chemotaxis;cytoskeleton organization;establishment or maintenan…	alpha(1,2)-fucosyltransferase activity;binding;catalytic activity;cytoskeletal protein binding;fucosyltransferase activity;galactoside 2-alpha-L-fucosyltransferase activity;microtubule binding;microtubule plus-end binding;protein binding;transferase activity;transferase activity, transferring glycosyl groups;transferase activity, transferring hexosyl groups;tubulin binding	cell cortex;cell part;cell projection membrane;cell projection part;chromosomal part;condensed chromosome kinetochore;cytoplasm;cytoplasmic microtubule;cytoplasmic part;cytoskeletal part;cytosol;Golgi apparatus;Golgi apparatus part;intracellular membrane-bounded organelle;intracellular non-membrane-bounded organelle;intracellular organelle;intracellular organelle part;intracellular part;kinetocho…		14-3-3 domain binding motif;Calmodulin-dependent protein kinase I substrate motif;Calmodulin-dependent protein kinase II substrate motif;Calmodulin-dependent protein kinase IV substrate motif;Casein kinase II substrate motif;Chk1 kinase substrate motif;PKA kinase substrate motif;PKC kinase substrate motif;Pyruvate dehydrogenase kinase substrate motif		0.994159	1.57e-49	176.67	1824300000	1015300000	808930000	604	22.3094
-1.95211	NaN	-2.13951	NaN	-1.09745	-3.08559	NaN	-2.79117	NaN	-3.19003	-3.27255	NaN	-2.27371	NaN	-1.16628	-3.27913	NaN	NaN	-3.39012	-2.95324	-2.94902	-2.80012	-3.08445	-2.64213	-2.66122	NaN	NaN	-2.18282	NaN	-3.14805	NaN	-3.33879	S	4	769	___1	axon guidance;biological regulation;cell cycle;cell cycle phase;cell cycle process;cell division;cellular component organization;cellular component organization at cellular level;cellular component organization or biogenesis;cellular component organization or biogenesis at cellular level;cellular process;cellular response to stimulus;chemotaxis;cytoskeleton organization;establishment or maintenan…	alpha(1,2)-fucosyltransferase activity;binding;catalytic activity;cytoskeletal protein binding;fucosyltransferase activity;galactoside 2-alpha-L-fucosyltransferase activity;microtubule binding;microtubule plus-end binding;protein binding;transferase activity;transferase activity, transferring glycosyl groups;transferase activity, transferring hexosyl groups;tubulin binding	cell cortex;cell part;cell projection membrane;cell projection part;chromosomal part;condensed chromosome kinetochore;cytoplasm;cytoplasmic microtubule;cytoplasmic part;cytoskeletal part;cytosol;Golgi apparatus;Golgi apparatus part;intracellular membrane-bounded organelle;intracellular non-membrane-bounded organelle;intracellular organelle;intracellular organelle part;intracellular part;kinetocho…		Calmodulin-dependent protein kinase II substrate motif;Casein kinase II substrate motif;Chk1 kinase substrate motif;PKA kinase substrate motif;PKC kinase substrate motif;Pyruvate dehydrogenase kinase substrate motif		1	7.94e-63	132.61	2076200000	671170000	1405000000	241	72.4713
0.965475	NaN	NaN	1.82933	0.552557	1.79912	1.0513	0.421438	NaN	1.79126	0.832116	0.619076	NaN	1.78579	0.539405	1.7563	1.02627	NaN	1.74862	0.621559	0.40246	NaN	NaN	-0.0312763	0.82455	NaN	NaN	NaN	1.95099	1.91877	1.12121	0.887457	S	2	777	___1	anatomical structure development;biological regulation;biosynthetic process;cellular biosynthetic process;cellular component organization;cellular component organization at cellular level;cellular component organization or biogenesis;cellular component organization or biogenesis at cellular level;cellular macromolecule biosynthetic process;cellular macromolecule metabolic process;cellular metabol…	binding;catalytic activity;cation binding;demethylase activity;dioxygenase activity;histone binding;histone demethylase activity;histone demethylase activity (H3-K9 specific);ion binding;iron ion binding;metal ion binding;methylated histone residue binding;oxidoreductase activity;protein binding;transition metal ion binding;zinc ion binding	cell part;chromosomal part;condensed chromosome kinetochore;cytoplasm;intracellular membrane-bounded organelle;intracellular non-membrane-bounded organelle;intracellular organelle;intracellular organelle part;intracellular part;kinetochore;macromolecular complex;membrane-bounded organelle;non-membrane-bounded organelle;nuclear part;nucleolus;nucleoplasm;nucleus;organelle;organelle part;protein co…		14-3-3 domain binding motif;Calmodulin-dependent protein kinase II substrate motif;G protein-coupled receptor kinase 1 substrate motif;MAPKAPK1 kinase substrate motif;Pim1 kinase substrate sequence;PKA kinase substrate motif;PKA, PKG kinase substrate motif;PKC epsilon kinase substrate motif;PKC kinase substrate motif;PKG kinase substrate motif	+	1	7.37e-13	122.94	807690000	589890000	217800000	899	90.3936
0.731833	0.75391	1.11507	0.161192	0.782759	1.00959	0.295281	0.999741	NaN	0.798792	1.72274	1.64538	1.08853	0.157355	0.764128	0.985559	0.288253	NaN	0.77978	1.19618	0.990264	0.241562	0.591254	0.472708	0.826657	NaN	NaN	1.18923	0.171912	1.07673	0.31492	1.83731	S	3	778	___1	establishment of localization;establishment of localization in cell;establishment of RNA localization;intracellular transport;mRNA export from nucleus;mRNA transport;nuclear export;nuclear transport;nucleic acid transport;nucleobase-containing compound transport;nucleocytoplasmic transport;poly(A)+ mRNA export from nucleus;RNA export from nucleus;RNA transport;transport	binding;cation binding;ion binding;metal ion binding			14-3-3 domain binding motif;Calmodulin-dependent protein kinase II substrate motif;Pim1 kinase substrate sequence;PKA kinase substrate motif;PKC epsilon kinase substrate motif;PKC kinase substrate motif		0.999901	9.67e-10	101.78	3566200000	2688100000	878080000	290	40.0614
0.160163	-0.0746103	-0.0143576	NaN	0.0402146	0.011056	0.12071	0.0904128	0.0460058	-0.545838	0.230766	-0.162025	-0.0152581	NaN	0.0392575	0.0107929	0.117837	0.0449108	-0.580075	0.349378	0.504827	0.511033	0.42965	0.596239	-0.0138627	NaN	0.637252	-0.0146482	NaN	0.0117914	0.128738	0.246114	S	3	778	___1	establishment of localization;establishment of localization in cell;establishment of RNA localization;intracellular transport;mRNA export from nucleus;mRNA transport;nuclear export;nuclear transport;nucleic acid transport;nucleobase-containing compound transport;nucleocytoplasmic transport;poly(A)+ mRNA export from nucleus;RNA export from nucleus;RNA transport;transport	binding;cation binding;ion binding;metal ion binding			14-3-3 domain binding motif;Calmodulin-dependent protein kinase II substrate motif;Casein kinase II substrate motif;G protein-coupled receptor kinase 1 substrate motif;MAPKAPK1 kinase substrate motif;PAK2 kinase substrate motif;PKA kinase substrate motif;PKC epsilon kinase substrate motif;PKC kinase substrate motif	+	0.998231	1.32e-63	158.29	8238700000	5795200000	2443500000	758	24.8447
1.67132	1.3765	-0.830896	0.341085	1.7814	0.858244	1.62081	1.33764	NaN	0.450623	0.893553	NaN	-0.883013	0.332967	1.739	0.837816	1.58224	NaN	0.439897	2.07793	0.786215	0.540922	-0.395364	1.00794	1.19993	NaN	1.64302	-0.847717	0.36377	0.915323	1.72861	0.95298	S	3	782	___1		enzyme inhibitor activity;enzyme regulator activity;phosphatase inhibitor activity;phosphatase regulator activity;protein phosphatase inhibitor activity;protein phosphatase regulator activity			14-3-3 domain binding motif;Calmodulin-dependent protein kinase II alpha substrate motif;Calmodulin-dependent protein kinase II substrate motif;Calmodulin-dependent protein kinase IV substrate motif;Chk1 kinase substrate motif;DMPK1,2 kinase substrate motif;G protein-coupled receptor kinase 1 substrate motif;MAPKAPK2 kinase substrate motif;Phosphorylase kinase substrate motif;PKA kinase substrate…		0.999983	3.99e-12	106.93	401060000	307370000	93690000	480	47.8041
NaN	0.547004	-0.571355	0.606833	1.10679	NaN	0.875159	1.19137	-0.476136	0.133641	0.633307	NaN	-0.607192	0.59239	1.08045	NaN	0.854329	-0.506001	0.130461	NaN	0.621766	0.0225803	NaN	0.737744	-0.110374	NaN	0.30868	-0.582921	0.647192	NaN	0.933363	0.675426	S	3	783	___1			cell part;cytoplasm;intracellular membrane-bounded organelle;intracellular organelle;intracellular part;membrane-bounded organelle;organelle		14-3-3 domain binding motif;Calmodulin-dependent protein kinase II substrate motif;Casein kinase II substrate motif;ERK1,2 kinase substrate motif;G protein-coupled receptor kinase 1 substrate motif;GSK-3, ERK1, ERK2, CDK5 substrate motif;MDC1 BRCT domain binding motif;PKA kinase substrate motif;PKC kinase substrate motif;Plk1 PBD domain binding motif;Pyruvate dehydrogenase kinase substrate motif;…		0.999833	7.92e-24	124.63	256520000	176860000	79656000	717	38.0808
-0.821848	0.273429	-1.06574	NaN	-0.822848	-1.17783	-0.738692	-1.11189	-1.21388	-0.636917	-1.27608	NaN	-1.13258	NaN	-0.87446	-1.25171	-0.785025	-1.29002	-0.676866	-0.57018	-0.630193	0.099714	-1.01109	-0.524588	-1.1257	NaN	-0.232376	-1.08731	NaN	-1.20167	-0.753646	-1.30191	S	4	789;790	___1	actin cytoskeleton organization;actin filament-based process;anatomical structure development;biological adhesion;biological regulation;cell adhesion;cell differentiation;cell differentiation involved in embryonic placenta development;cell-cell adhesion;cellular component organization;cellular component organization at cellular level;cellular component organization or biogenesis;cellular componen…	ATPase activator activity;ATPase regulator activity;binding;chaperone binding;DNA binding;enzyme activator activity;enzyme regulator activity;heat shock protein binding;nucleic acid binding;nucleoside-triphosphatase regulator activity;protein binding;unfolded protein binding	cell part;contractile fiber part;cytoplasm;cytoplasmic part;cytosol;intracellular membrane-bounded organelle;intracellular organelle;intracellular organelle part;intracellular part;membrane;membrane-bounded organelle;nuclear part;nucleoplasm;nucleus;organelle;organelle part;perinuclear region of cytoplasm;Z disc		BARD1 BRCT domain binding motif;Casein kinase II substrate motif;G protein-coupled receptor kinase 1 substrate motif		1	1.92e-24	112.55	3690900000	2024900000	1666100000	277	89.8587
0.987843	1.01588	NaN	-0.149251	1.00168	-0.0288517	1.24506	0.971618	NaN	0.0556122	0.0436466	NaN	NaN	-0.158612	0.977835	-0.0306614	1.21542	NaN	0.0542886	0.383148	0.685603	-0.0599468	NaN	NaN	0.286149	NaN	0.842579	NaN	-0.152272	-0.0294358	1.32786	0.0465494	S	2	806	___1	biological regulation;catabolic process;cation transport;cell cycle process;cellular catabolic process;cellular component disassembly;cellular component disassembly at cellular level;cellular component organization;cellular component organization at cellular level;cellular component organization or biogenesis;cellular component organization or biogenesis at cellular level;cellular macromolecular …	adenyl nucleotide binding;adenyl ribonucleotide binding;ATP binding;ATPase activity;ATPase activity, coupled;binding;catalytic activity;hydrolase activity;hydrolase activity, acting on acid anhydrides;hydrolase activity, acting on acid anhydrides, in phosphorus-containing anhydrides;identical protein binding;nucleoside-triphosphatase activity;nucleotide binding;protein binding;protein C-terminus …	cell part;centrosome;cytoplasm;cytoplasmic part;cytoskeletal part;cytosol;endosomal part;endosome;endosome membrane;extracellular membrane-bounded organelle;extracellular organelle;extracellular region part;extracellular vesicular exosome;intracellular membrane-bounded organelle;intracellular non-membrane-bounded organelle;intracellular organelle;intracellular organelle part;intracellular part;la…	Endocytosis	b-Adrenergic Receptor kinase substrate motif;Casein kinase II substrate motif;PKA kinase substrate motif		1	7.04e-89	225.82	2142500000	1526600000	615860000	102	137.302
0.586402	0.604119	-0.146727	NaN	NaN	0.762981	0.334401	0.602728	0.599768	0.589202	0.511194	NaN	-0.15593	NaN	NaN	0.744821	0.326442	0.585493	0.575179	NaN	0.383791	0.242105	0.763018	0.506015	0.17668	NaN	0.759038	-0.149697	NaN	0.813725	0.356641	0.545192	S	2	815	___1	alpha-beta T cell activation;alpha-beta T cell differentiation;anatomical structure development;biological regulation;biosynthetic process;CD4-positive, alpha-beta T cell activation;CD4-positive, alpha-beta T cell differentiation;CD4-positive, CD25-positive, alpha-beta regulatory T cell differentiation;cell activation;cell differentiation;cell surface receptor linked signaling pathway;cellular bi…	activating transcription factor binding;binding;chromatin binding;DNA binding;enzyme binding;enzyme regulator activity;histone deacetylase binding;histone deacetylase regulator activity;hormone receptor binding;nuclear hormone receptor binding;nucleic acid binding;nucleic acid binding transcription factor activity;protein binding;protein binding transcription factor activity;receptor binding;regu…	cell part;chromatin;chromosomal part;cytoplasm;cytoskeletal part;intracellular membrane-bounded organelle;intracellular organelle;intracellular organelle part;intracellular part;macromolecular complex;membrane;membrane-bounded organelle;microtubule;nuclear chromatin;nuclear chromosome part;nuclear part;nucleoplasm;nucleoplasm part;nucleus;organelle;organelle part;protein complex;spindle microtubu…		Casein kinase I substrate motif;Casein kinase II substrate motif;ERK1,2 kinase substrate motif;Growth associated histone HI kinase substrate motif;GSK-3, ERK1, ERK2, CDK5 substrate motif;WW domain binding motif		0.996914	2.75e-16	125.86	687040000	481540000	205500000	2184	25.3858
0.013183	0.336563	-0.475885	0.312766	-0.332333	0.00271787	-0.238735	-0.040737	-0.0105236	0.14514	-0.324647	0.337138	-0.505734	0.305321	-0.353178	0.00265318	-0.253709	-0.0111837	0.141686	0.000767011	-0.103543	-0.112428	0.105861	-0.200341	0.133975	0.367228	-0.238726	-0.485519	0.333567	0.00289863	-0.243568	-0.331219	S	2	815	___1	alpha-beta T cell activation;alpha-beta T cell differentiation;anatomical structure development;biological regulation;biosynthetic process;CD4-positive, alpha-beta T cell activation;CD4-positive, alpha-beta T cell differentiation;CD4-positive, CD25-positive, alpha-beta regulatory T cell differentiation;cell activation;cell differentiation;cell surface receptor linked signaling pathway;cellular bi…	activating transcription factor binding;binding;chromatin binding;DNA binding;enzyme binding;enzyme regulator activity;histone deacetylase binding;histone deacetylase regulator activity;hormone receptor binding;nuclear hormone receptor binding;nucleic acid binding;nucleic acid binding transcription factor activity;protein binding;protein binding transcription factor activity;receptor binding;regu…	cell part;chromatin;chromosomal part;cytoplasm;cytoskeletal part;intracellular membrane-bounded organelle;intracellular organelle;intracellular organelle part;intracellular part;macromolecular complex;membrane;membrane-bounded organelle;microtubule;nuclear chromatin;nuclear chromosome part;nuclear part;nucleoplasm;nucleoplasm part;nucleus;organelle;organelle part;protein complex;spindle microtubu…		Casein kinase II substrate motif;ERK1,2 kinase substrate motif;GSK-3, ERK1, ERK2, CDK5 substrate motif;PKA kinase substrate motif;PKC kinase substrate motif;WW domain binding motif		1	5.67e-06	112.84	1350600000	846860000	503730000	2120	77.5969
1.23334	0.896544	0.913039	0.851351	2.28948	-0.331911	0.751755	1.12818	1.24114	0.551989	2.05736	1.35364	0.891308	0.831087	2.23499	-0.352729	0.733862	1.21159	0.538851	1.08023	1.36126	0.638995	-0.446693	0.226816	1.50563	NaN	1.50185	0.973763	0.907972	-0.33863	0.801752	2.19419	S	2	825	___1	biological regulation;cellular process;ER to Golgi vesicle-mediated transport;establishment of localization;establishment of localization in cell;establishment of protein localization;Golgi vesicle transport;intracellular transport;positive regulation of biological process;positive regulation of catabolic process;positive regulation of macromolecule metabolic process;positive regulation of metabo…		cell part;cytoplasmic membrane-bounded vesicle;cytoplasmic part;cytoplasmic vesicle;endoplasmic reticulum membrane;endoplasmic reticulum part;endoplasmic reticulum-Golgi intermediate compartment;endoplasmic reticulum-Golgi intermediate compartment membrane;Golgi apparatus part;Golgi membrane;integral to membrane;intracellular membrane-bounded organelle;intracellular organelle;intracellular organe…	Phagosome;SNARE interactions in vesicular transport	Casein kinase II substrate motif		1	1.26e-38	162.59	2163700000	1707900000	455740000	137	72.3821
-1.71879	NaN	-0.421936	-1.15162	-0.658316	-1.0556	-1.48703	-0.833363	-0.601058	-1.92212	-0.452454	NaN	-0.448401	-1.22385	-0.699607	-1.12181	-1.58031	-0.638758	-2.04269	-1.43088	-0.996616	-0.829822	NaN	NaN	NaN	NaN	-1.88911	-0.430477	-1.17493	-1.07697	-1.51714	-0.461614	S	2	826;827	___1	biological regulation;cell cycle;cell division;cell migration;cell motility;cellular component movement;cellular component organization;cellular component organization at cellular level;cellular component organization or biogenesis;cellular component organization or biogenesis at cellular level;cellular macromolecule metabolic process;cellular metabolic process;cellular nitrogen compound metaboli…		cell part;cytoplasm;intracellular organelle part;intracellular part;membrane;nuclear body;nuclear matrix;nuclear part;nuclear speck;nucleoplasm;nucleoplasm part;organelle part	Spliceosome	b-Adrenergic Receptor kinase substrate motif;Casein kinase II substrate motif		1	2.58e-80	207.38	8038900000	4661700000	3377200000	888	75.7522
0.281985	0.0603867	NaN	NaN	NaN	0.0507064	0.0764677	0.207581	NaN	0.606354	0.461139	0.432929	NaN	NaN	NaN	0.0494995	0.0746477	NaN	0.591922	NaN	0.143311	-0.318249	NaN	-0.416327	-0.490486	NaN	NaN	NaN	NaN	0.0540787	0.0815534	0.491808	S	3	826;827	___1	biological regulation;cell cycle;cell division;cell migration;cell motility;cellular component movement;cellular component organization;cellular component organization at cellular level;cellular component organization or biogenesis;cellular component organization or biogenesis at cellular level;cellular macromolecule metabolic process;cellular metabolic process;cellular nitrogen compound metaboli…		cell part;cytoplasm;intracellular organelle part;intracellular part;membrane;nuclear body;nuclear matrix;nuclear part;nuclear speck;nucleoplasm;nucleoplasm part;organelle part	Spliceosome	14-3-3 domain binding motif;Calmodulin-dependent protein kinase II substrate motif;Casein kinase II substrate motif;PAK2 kinase substrate motif;PKA kinase substrate motif;PKC epsilon kinase substrate motif;PKC kinase substrate motif	+	0.750813	2.86e-45	126.47	302630000	194690000	107940000	34	5.81211
0.340862	-0.338989	-0.808121	-0.449929	0.548289	0.15937	-0.0304782	0.554405	NaN	0.0591839	NaN	NaN	-0.858809	-0.47815	0.535239	0.155576	-0.0323899	NaN	0.0577752	-0.146662	-0.0528264	0.0543378	NaN	NaN	-0.321774	NaN	NaN	-0.824481	-0.459037	0.169969	-0.0310952	NaN	S	2	830	___1	biological regulation;cell surface receptor linked signaling pathway;cellular process;cellular response to stimulus;enzyme linked receptor protein signaling pathway;insulin-like growth factor receptor signaling pathway;regulation of biological process;regulation of cellular process;response to stimulus;signal transduction;transmembrane receptor protein tyrosine kinase signaling pathway				14-3-3 domain binding motif;Calmodulin-dependent protein kinase II alpha substrate motif;Calmodulin-dependent protein kinase II substrate motif;Calmodulin-dependent protein kinase IV substrate motif;Casein kinase II substrate motif;Chk1 kinase substrate motif;G protein-coupled receptor kinase 1 substrate motif;GSK3 kinase substrate motif;MAPKAPK2 kinase substrate motif;Phosphorylase kinase substr…		0.999199	0.000317393	75.819	338550000	214310000	124240000	638	30.9723
0.950014	0.662465	1.30204	2.85237	NaN	NaN	1.3211	1.17993	0.214327	NaN	1.26938	1.35792	1.27105	2.78448	NaN	NaN	1.28966	0.209225	NaN	1.94775	1.62216	1.96959	NaN	1.41606	2.06299	0.370537	1.16582	1.38864	3.04207	NaN	1.40896	1.3538	S	2	839	___1	biological regulation;biosynthetic process;cellular biosynthetic process;cellular component assembly;cellular component assembly at cellular level;cellular component organization;cellular component organization at cellular level;cellular component organization or biogenesis;cellular component organization or biogenesis at cellular level;cellular macromolecular complex assembly;cellular macromolec…	activating transcription factor binding;binding;chromatin binding;DNA binding;nucleic acid binding;protein binding;protein binding transcription factor activity;RNA polymerase II transcription coactivator activity;RNA polymerase II transcription cofactor activity;RNA polymerase II transcription factor binding transcription factor activity;RNA polymerase II transcription factor binding transcripti…	cell part;chromatin;chromosomal part;cytoplasmic part;cytosol;heterochromatin;intracellular membrane-bounded organelle;intracellular organelle;intracellular organelle part;intracellular part;membrane-bounded organelle;nuclear chromatin;nuclear chromosome part;nuclear heterochromatin;nuclear part;nuclear periphery;nucleoplasm;nucleus;organelle;organelle part;transcriptionally active chromatin		Casein kinase I substrate motif;Casein kinase II substrate motif;PKA kinase substrate motif;PKC kinase substrate motif;Pyruvate dehydrogenase kinase substrate motif		1	3.35e-272	302.29	12735000000	10199000000	2535600000	129	80.5127
-0.475487	-0.213625	0.545396	0.0264061	-0.788367	-0.87426	-0.794416	-0.121738	-0.0862241	-0.278133	-0.212749	-0.473201	0.532415	0.0257776	-0.837816	-0.929097	-0.844244	-0.0916324	-0.295579	-0.197504	-0.0219956	0.00215587	-0.47754	-0.349684	-0.129028	NaN	-0.29267	0.581669	0.0281622	-0.891959	-0.810498	-0.217055	S	2	844;845	___1	assembly of spliceosomal tri-snRNP;biological regulation;cellular component assembly;cellular component assembly at cellular level;cellular component organization;cellular component organization at cellular level;cellular component organization or biogenesis;cellular component organization or biogenesis at cellular level;cellular macromolecular complex assembly;cellular macromolecular complex sub…	binding;nucleic acid binding;nucleotide binding;protein binding;protein domain specific binding;RNA binding;RS domain binding;unfolded protein binding	cell part;cytoplasm;intracellular membrane-bounded organelle;intracellular organelle;intracellular organelle part;intracellular part;membrane-bounded organelle;nuclear body;nuclear part;nuclear speck;nucleoplasm;nucleoplasm part;nucleus;organelle;organelle part	Spliceosome	14-3-3 domain binding motif;Akt kinase substrate motif;Calmodulin-dependent protein kinase II substrate motif;Casein kinase II substrate motif;MAPKAPK1 kinase substrate motif;MAPKAPK2 kinase substrate motif;PKA kinase substrate motif;PKC kinase substrate motif		1	3.25e-17	173.06	36667000000	22930000000	13736000000	133	107.88
NaN	-0.402975	NaN	-0.106899	NaN	-0.612772	-0.851609	-0.676015	-0.305961	NaN	NaN	0.0482117	NaN	-0.113604	NaN	-0.651207	-0.905024	-0.325152	NaN	-0.744972	0.0629488	0.039574	NaN	-0.238086	NaN	NaN	-0.0845984	NaN	-0.109063	-0.625177	-0.868849	NaN	S	2	844	___1	assembly of spliceosomal tri-snRNP;biological regulation;cellular component assembly;cellular component assembly at cellular level;cellular component organization;cellular component organization at cellular level;cellular component organization or biogenesis;cellular component organization or biogenesis at cellular level;cellular macromolecular complex assembly;cellular macromolecular complex sub…	binding;nucleic acid binding;nucleotide binding;protein binding;protein domain specific binding;RNA binding;RS domain binding;unfolded protein binding	cell part;cytoplasm;intracellular membrane-bounded organelle;intracellular organelle;intracellular organelle part;intracellular part;membrane-bounded organelle;nuclear body;nuclear part;nuclear speck;nucleoplasm;nucleoplasm part;nucleus;organelle;organelle part	Spliceosome	Casein kinase II substrate motif;ERK1,2 kinase substrate motif;G protein-coupled receptor kinase 1 substrate motif;Growth associated histone HI kinase substrate motif;GSK3 kinase substrate motif;GSK-3, ERK1, ERK2, CDK5 substrate motif;PKA kinase substrate motif;PKC kinase substrate motif;WW domain binding motif		0.997807	0.000404032	92.653	1116600000	657620000	458960000	255	26.5803
0.16024	-0.772888	0.693862	0.160141	0.158505	0.823265	0.187078	-0.172786	NaN	0.518427	0.770807	NaN	0.677347	0.156329	0.154733	0.80367	0.182625	NaN	0.506087	0.116018	0.671305	NaN	0.17673	0.0646252	0.814844	NaN	0.340815	0.740009	0.170791	0.878018	0.19952	0.822071	S	3	845	___1	assembly of spliceosomal tri-snRNP;biological regulation;cellular component assembly;cellular component assembly at cellular level;cellular component organization;cellular component organization at cellular level;cellular component organization or biogenesis;cellular component organization or biogenesis at cellular level;cellular macromolecular complex assembly;cellular macromolecular complex sub…	binding;nucleic acid binding;nucleotide binding;protein binding;protein domain specific binding;RNA binding;RS domain binding;unfolded protein binding	cell part;cytoplasm;intracellular membrane-bounded organelle;intracellular organelle;intracellular organelle part;intracellular part;membrane-bounded organelle;nuclear body;nuclear part;nuclear speck;nucleoplasm;nucleoplasm part;nucleus;organelle;organelle part	Spliceosome	14-3-3 domain binding motif;Calmodulin-dependent protein kinase II substrate motif;Casein kinase II substrate motif;PKA kinase substrate motif;PKC kinase substrate motif;Pyruvate dehydrogenase kinase substrate motif;ZIP kinase substrate motif		0.982778	6.23e-131	203.75	1436500000	953390000	483130000	157	17.695
3.8232	5.27779	1.97171	3.67197	3.98138	3.00267	3.28551	4.13013	NaN	3.84499	1.75031	4.89975	1.92478	3.58457	3.88662	2.9312	3.20731	NaN	3.75347	3.08911	4.78772	NaN	1.47127	0.671337	4.39335	NaN	4.39659	2.10284	3.91618	3.20237	3.50402	1.86672	S	2	858	___1	B cell activation;biological regulation;cell activation;cellular component assembly;cellular component organization;cellular component organization or biogenesis;cellular process;cellular response to stimulus;immune system process;leukocyte activation;lymphocyte activation;macromolecular complex assembly;macromolecular complex subunit organization;negative regulation of biological process;negativ…	binding;binding, bridging;protein binding;protein binding, bridging;SH3/SH2 adaptor activity;signaling adaptor activity	cell part;cytoplasm;cytoplasmic part;cytosol;intracellular organelle part;intracellular part;membrane;nuclear part;nucleoplasm;organelle part;plasma membrane		14-3-3 domain binding motif;ATM kinase substrate motif;Calmodulin-dependent protein kinase II substrate motif;Casein kinase II substrate motif;DNA dependent Protein kinase substrate motif;PKA kinase substrate motif;PKC epsilon kinase substrate motif;PKC kinase substrate motif		1	3.53e-193	282.86	8408100000	8151400000	256690000	283	77.0882
0.243421	0.672546	0.434729	-0.5909	0.249214	0.36062	0.0830188	0.635275	0.0627716	0.500303	0.104607	0.301365	0.424381	-0.627963	0.243283	0.352037	0.0810428	0.0612775	0.488395	0.568035	-0.467836	0.419491	0.902061	0.515962	0.644368	NaN	0.744705	0.463641	-0.602863	0.384604	0.0885401	0.111564	S	2	859	___1	anatomical structure morphogenesis;biological regulation;cellular macromolecule metabolic process;cellular metabolic process;cellular nitrogen compound metabolic process;cellular process;cellular protein metabolic process;cellular response to chemical stimulus;cellular response to dsRNA;cellular response to organic substance;cellular response to oxidative stress;cellular response to stimulus;cell…	binding;double-stranded RNA binding;enzyme activator activity;enzyme binding;enzyme regulator activity;identical protein binding;nucleic acid binding;protein binding;protein dimerization activity;protein homodimerization activity;RNA binding	cell part;cytoplasm;cytoplasmic part;cytosol;intracellular organelle part;intracellular part;membrane;nuclear part;nucleoplasm;organelle part;perinuclear region of cytoplasm		14-3-3 domain binding motif;b-Adrenergic Receptor kinase substrate motif;Calmodulin-dependent protein kinase II substrate motif;Calmodulin-dependent protein kinase IV substrate motif;Casein kinase II substrate motif;Chk1 kinase substrate motif;G protein-coupled receptor kinase 1 substrate motif;GSK3 kinase substrate motif;PKA kinase substrate motif;PKC epsilon kinase substrate motif;PKC kinase su…		0.994371	7.36e-55	133.15	3510800000	2483800000	1027100000	18	22.7171
-0.303742	-0.43305	-0.31322	-0.657211	-0.602352	-0.196665	-0.36399	-0.0371739	NaN	-1.19252	-0.570735	-0.487419	-0.332866	-0.698434	-0.640133	-0.209001	-0.38682	NaN	-1.26732	-0.128887	0.0617823	-0.729748	-0.458406	NaN	-1.70122	NaN	-0.183923	-0.319561	-0.670516	-0.200647	-0.371358	-0.582289	S	2	864	___1	anatomical structure morphogenesis;axon guidance;axonogenesis;biological regulation;biosynthetic process;branchiomotor neuron axon guidance;cell part morphogenesis;cell projection morphogenesis;cell projection organization;cellular biosynthetic process;cellular component morphogenesis;cellular component organization;cellular component organization at cellular level;cellular component organization…	acid-amino acid ligase activity;binding;catalytic activity;cation binding;ion binding;ligase activity;ligase activity, forming carbon-nitrogen bonds;metal ion binding;small conjugating protein ligase activity;transition metal ion binding;ubiquitin-protein ligase activity;zinc ion binding	axon;cell part;cell projection;cytoskeleton;intracellular membrane-bounded organelle;intracellular non-membrane-bounded organelle;intracellular organelle;intracellular part;membrane;membrane-bounded organelle;microtubule cytoskeleton;neuron projection;non-membrane-bounded organelle;nucleus;organelle		14-3-3 domain binding motif;Akt kinase substrate motif;Calmodulin-dependent protein kinase II substrate motif;Casein kinase II substrate motif;MAPKAPK1 kinase substrate motif;PKA kinase substrate motif;PKC kinase substrate motif;ZIP kinase substrate motif		1	3.03e-30	157.54	1192300000	654820000	537430000	3467	69.8373
0.0151653	NaN	0.113747	NaN	-0.466079	0.365038	NaN	-0.517384	NaN	0.423476	0.536232	NaN	0.11104	NaN	-0.495313	0.35635	NaN	NaN	0.413396	NaN	NaN	-0.304452	-0.246958	0.0358385	-0.654232	NaN	NaN	0.121312	NaN	0.389316	NaN	0.571895	S	3	864	___1	anatomical structure morphogenesis;axon guidance;axonogenesis;biological regulation;biosynthetic process;branchiomotor neuron axon guidance;cell part morphogenesis;cell projection morphogenesis;cell projection organization;cellular biosynthetic process;cellular component morphogenesis;cellular component organization;cellular component organization at cellular level;cellular component organization…	acid-amino acid ligase activity;binding;catalytic activity;cation binding;ion binding;ligase activity;ligase activity, forming carbon-nitrogen bonds;metal ion binding;small conjugating protein ligase activity;transition metal ion binding;ubiquitin-protein ligase activity;zinc ion binding	axon;cell part;cell projection;cytoskeleton;intracellular membrane-bounded organelle;intracellular non-membrane-bounded organelle;intracellular organelle;intracellular part;membrane;membrane-bounded organelle;microtubule cytoskeleton;neuron projection;non-membrane-bounded organelle;nucleus;organelle		14-3-3 domain binding motif;Calmodulin-dependent protein kinase II substrate motif;ERK1,2 kinase substrate motif;GSK-3, ERK1, ERK2, CDK5 substrate motif;MAPKAPK2 kinase substrate motif;PKA kinase substrate motif;PKC kinase substrate motif;WW domain binding motif		1	1.55e-29	154.51	2205500000	1404400000	801060000	2751	91.0771
0.237073	0.318554	-0.314226	-0.134951	0.213176	0.192672	0.486276	0.15001	-0.0862241	0.254014	0.838425	0.165422	-0.333935	-0.143415	0.208102	0.188086	0.474702	-0.0916324	0.247968	0.00881517	0.338786	-0.881158	0.0273183	0.191559	-0.631661	-1.00957	0.100196	-0.320587	-0.137683	0.205486	0.518617	0.894186	S	2	864	___1	anatomical structure morphogenesis;axon guidance;axonogenesis;biological regulation;biosynthetic process;branchiomotor neuron axon guidance;cell part morphogenesis;cell projection morphogenesis;cell projection organization;cellular biosynthetic process;cellular component morphogenesis;cellular component organization;cellular component organization at cellular level;cellular component organization…	acid-amino acid ligase activity;binding;catalytic activity;cation binding;ion binding;ligase activity;ligase activity, forming carbon-nitrogen bonds;metal ion binding;small conjugating protein ligase activity;transition metal ion binding;ubiquitin-protein ligase activity;zinc ion binding	axon;cell part;cell projection;cytoskeleton;intracellular membrane-bounded organelle;intracellular non-membrane-bounded organelle;intracellular organelle;intracellular part;membrane;membrane-bounded organelle;microtubule cytoskeleton;neuron projection;non-membrane-bounded organelle;nucleus;organelle		14-3-3 domain binding motif;Akt kinase substrate motif;Calmodulin-dependent protein kinase II substrate motif;Casein kinase II substrate motif;G protein-coupled receptor kinase 1 substrate motif;MAPKAPK1 kinase substrate motif;PKA kinase substrate motif;PKC kinase substrate motif		0.999351	2.95e-70	200.67	5120500000	3327000000	1793500000	2833	32.167
0.507619	-0.104337	-0.697053	-1.20303	0.70585	0.571908	0.237202	-0.401366	-0.227194	0.463469	0.497609	0.442734	-0.740775	-1.27849	0.68905	0.558296	0.231556	-0.241445	0.452438	0.713149	-1.04233	-0.795668	0.373774	0.159226	-0.028813	NaN	-0.0477735	-0.711164	-1.22739	0.609944	0.252977	0.530704	S	2	864	___1	anatomical structure morphogenesis;axon guidance;axonogenesis;biological regulation;biosynthetic process;branchiomotor neuron axon guidance;cell part morphogenesis;cell projection morphogenesis;cell projection organization;cellular biosynthetic process;cellular component morphogenesis;cellular component organization;cellular component organization at cellular level;cellular component organization…	acid-amino acid ligase activity;binding;catalytic activity;cation binding;ion binding;ligase activity;ligase activity, forming carbon-nitrogen bonds;metal ion binding;small conjugating protein ligase activity;transition metal ion binding;ubiquitin-protein ligase activity;zinc ion binding	axon;cell part;cell projection;cytoskeleton;intracellular membrane-bounded organelle;intracellular non-membrane-bounded organelle;intracellular organelle;intracellular part;membrane;membrane-bounded organelle;microtubule cytoskeleton;neuron projection;non-membrane-bounded organelle;nucleus;organelle		14-3-3 domain binding motif;Calmodulin-dependent protein kinase II alpha substrate motif;Calmodulin-dependent protein kinase II substrate motif;Calmodulin-dependent protein kinase IV substrate motif;G protein-coupled receptor kinase 1 substrate motif;GSK3 kinase substrate motif;Phosphorylase kinase substrate motif;PKA kinase substrate motif;PKC kinase substrate motif		0.999977	2.66e-44	133.84	1309200000	837400000	471760000	3440	46.9736
-0.467096	0.0817475	0.226438	NaN	-0.573531	0.730342	-0.603128	0.0611034	1.60089	-0.0359245	-0.195825	-0.136269	0.221048	NaN	-0.609504	0.712959	-0.640958	1.56279	-0.0381778	NaN	0.101747	0.632517	NaN	NaN	-0.0924191	NaN	NaN	0.241497	NaN	0.778915	-0.615338	-0.199789	S	2	871	___1	cell differentiation;cellular component assembly;cellular component assembly at cellular level;cellular component organization;cellular component organization at cellular level;cellular component organization or biogenesis;cellular component organization or biogenesis at cellular level;cellular developmental process;cellular macromolecular complex assembly;cellular macromolecular complex subunit …	adenyl nucleotide binding;adenyl ribonucleotide binding;ATP binding;ATPase activity;ATPase activity, coupled;ATP-dependent helicase activity;ATP-dependent RNA helicase activity;binding;catalytic activity;helicase activity;hydrolase activity;hydrolase activity, acting on acid anhydrides;hydrolase activity, acting on acid anhydrides, in phosphorus-containing anhydrides;identical protein binding;nuc…	catalytic step 2 spliceosome;cell part;intracellular membrane-bounded organelle;intracellular organelle;intracellular organelle part;intracellular part;macromolecular complex;membrane;membrane-bounded organelle;nuclear part;nucleoplasm;nucleus;organelle;organelle part;ribonucleoprotein complex;small nuclear ribonucleoprotein complex;spliceosomal complex;U5 snRNP	Spliceosome	AMP-activated protein kinase substrate motif;Casein kinase I substrate motif;Casein kinase II substrate motif;Pyruvate dehydrogenase kinase substrate motif		1	6.31e-58	193.06	1940400000	1215100000	725260000	225	48.8985
-0.969646	-1.05664	NaN	NaN	-1.78811	-1.90178	-2.66629	-1.20586	NaN	-1.39747	-1.92347	-1.18933	NaN	NaN	-1.90026	-2.02106	-2.83353	NaN	-1.48512	-0.78327	-0.127373	-0.352776	-0.562899	-0.262842	-0.34182	NaN	-1.07938	NaN	NaN	-1.94028	-2.72027	-1.96241	S	2	876	___1	cellular component biogenesis;cellular component biogenesis at cellular level;cellular component organization or biogenesis;cellular component organization or biogenesis at cellular level;cellular process;ribonucleoprotein complex biogenesis;ribosome biogenesis	binding;DNA binding;nucleic acid binding;RNA binding	cell part;granular component;intracellular non-membrane-bounded organelle;intracellular organelle;intracellular organelle part;intracellular part;non-membrane-bounded organelle;nuclear part;nucleolar part;nucleolus;nucleoplasm;organelle;organelle part		ERK1,2 kinase substrate motif;GSK-3, ERK1, ERK2, CDK5 substrate motif;PKA kinase substrate motif;PKC kinase substrate motif;WW domain binding motif	+	1	3.21e-06	115.33	432790000	199880000	232920000	138	43.6508
-1.12677	-1.63188	-0.846055	NaN	-0.106513	-1.53983	-0.675864	-0.791805	-1.02416	0.520888	0.603852	-1.05526	-0.899122	NaN	-0.113194	-1.63641	-0.718256	-1.08839	0.50849	-1.30938	-1.06046	-1.17795	-2.47932	-0.790885	-0.597108	NaN	NaN	-0.863182	NaN	-1.571	-0.689546	0.644012	S	2	881	___1	anatomical structure morphogenesis;biological regulation;biosynthetic process;cell morphogenesis;cellular biosynthetic process;cellular component morphogenesis;cellular component organization;cellular component organization at cellular level;cellular component organization or biogenesis;cellular component organization or biogenesis at cellular level;cellular developmental process;cellular macromo…	adenyl nucleotide binding;adenyl ribonucleotide binding;ATP binding;binding;catalytic activity;enzyme activator activity;enzyme regulator activity;GTP binding;GTPase activator activity;GTPase regulator activity;guanyl nucleotide binding;guanyl ribonucleotide binding;kinase activity;nucleobase-containing compound kinase activity;nucleoside diphosphate kinase activity;nucleoside-triphosphatase regu…	cell part;cell projection;centriole;cilium;cytoplasm;cytoplasmic part;cytoplasmic vesicle;cytoskeletal part;extracellular membrane-bounded organelle;extracellular organelle;extracellular region part;extracellular vesicular exosome;Golgi apparatus;intracellular membrane-bounded organelle;intracellular non-membrane-bounded organelle;intracellular organelle;intracellular organelle part;intracellular…		PKA kinase substrate motif;PKC kinase substrate motif		1	0.0012154	129.63	689510000	364130000	325380000	28	80.838
-0.67987	-0.323133	-0.147362	-0.254294	-0.470607	-0.357486	-0.339574	-0.854089	-0.311541	-0.197017	-0.0298451	-0.329446	-0.156605	-0.270244	-0.500125	-0.379908	-0.360873	-0.331082	-0.209374	-0.549815	-0.353794	-0.173319	-0.361463	-0.479458	-0.355964	NaN	-0.566281	-0.150345	-0.259442	-0.364723	-0.346448	-0.0304493	S	3	912	___1	biological regulation;biosynthetic process;cell cycle phase;cell cycle process;cell division;cellular biosynthetic process;cellular component organization;cellular component organization at cellular level;cellular component organization or biogenesis;cellular component organization or biogenesis at cellular level;cellular macromolecule biosynthetic process;cellular macromolecule metabolic process…	binding;catalytic activity;cyclin-dependent protein kinase activity;enzyme binding;kinase activity;kinase binding;phosphotransferase activity, alcohol group as acceptor;protein binding;protein kinase activity;protein kinase binding;protein serine/threonine kinase activity;RNA polymerase II carboxy-terminal domain kinase activity;transferase activity;transferase activity, transferring phosphorus-c…	cell part;intracellular membrane-bounded organelle;intracellular organelle;intracellular part;membrane-bounded organelle;nucleus;organelle		Casein kinase II substrate motif;ERK1,2 kinase substrate motif;Growth associated histone HI kinase substrate motif;GSK-3, ERK1, ERK2, CDK5 substrate motif;PKA kinase substrate motif;PKC kinase substrate motif;WW domain binding motif		1	1.18e-66	225.33	3557300000	1955700000	1601500000	340	46.3177
2.28369	1.68374	NaN	0.422749	2.61252	0.516599	2.45705	2.60837	NaN	0.435695	-0.0717492	3.21448	NaN	0.412687	2.55034	0.504303	2.39856	NaN	0.425325	3.28655	2.49799	1.56177	NaN	2.36711	2.0561	NaN	2.85122	NaN	0.450865	0.550956	2.62046	-0.0732017	S	3	927	___1	anatomical structure homeostasis;biological regulation;homeostasis of number of cells;homeostasis of number of cells within a tissue;homeostatic process;positive regulation of adaptive immune response;positive regulation of adaptive immune response based on somatic recombination of immune receptors built from immunoglobulin superfamily domains;positive regulation of alpha-beta T cell activation;p…		cell part;cytoplasm;intracellular membrane-bounded organelle;intracellular organelle;intracellular part;membrane-bounded organelle;nucleus;organelle		14-3-3 domain binding motif;Calmodulin-dependent protein kinase II substrate motif;Calmodulin-dependent protein kinase IV substrate motif;Casein kinase II substrate motif;Chk1 kinase substrate motif;DNA dependent Protein kinase substrate motif;Pim1 kinase substrate sequence;PKA kinase substrate motif;PKA, PKG kinase substrate motif;PKC epsilon kinase substrate motif;PKC kinase substrate motif;PKG…		0.999999	1.69e-104	232.62	12509000000	11506000000	1002500000	7	59.6726
2.62144	1.65636	-0.49757	1.01311	2.33891	1.28936	2.67814	2.38177	-0.66819	1.52815	0.825315	2.80596	-0.52878	0.988999	2.28324	1.25867	2.61439	-0.7101	1.49178	1.76718	2.62104	1.86337	1.3581	1.63237	1.66243	-1.82469	2.01931	-0.507643	1.08049	1.37511	2.85625	0.880204	S	2	927	___1	anatomical structure homeostasis;biological regulation;homeostasis of number of cells;homeostasis of number of cells within a tissue;homeostatic process;positive regulation of adaptive immune response;positive regulation of adaptive immune response based on somatic recombination of immune receptors built from immunoglobulin superfamily domains;positive regulation of alpha-beta T cell activation;p…		cell part;cytoplasm;intracellular membrane-bounded organelle;intracellular organelle;intracellular part;membrane-bounded organelle;nucleus;organelle		14-3-3 domain binding motif;Calmodulin-dependent protein kinase I substrate motif;Calmodulin-dependent protein kinase II alpha substrate motif;Calmodulin-dependent protein kinase II substrate motif;Calmodulin-dependent protein kinase IV substrate motif;Casein kinase II substrate motif;Chk1 kinase substrate motif;MDC1 BRCT domain binding motif;PKA kinase substrate motif;PKC kinase substrate motif;…		0.999213	2.27e-05	105.94	12628000000	10922000000	1706000000	27	34.0469
-1.82842	-1.27494	-0.117387	NaN	NaN	-1.4443	-2.03611	-1.81819	NaN	-1.08649	-1.50363	-1.53193	-0.12475	NaN	NaN	-1.53489	-2.16382	NaN	-1.15464	-1.88638	-0.771179	-1.01577	-1.33756	-1.14258	-1.27321	NaN	-0.934478	-0.119763	NaN	-1.47354	-2.07733	-1.53407	S	2	929	___1	biological regulation;cell differentiation;cellular developmental process;cellular process;developmental process;osteoblast differentiation;regulation of apoptosis;regulation of biological process;regulation of cell aging;regulation of cell death;regulation of cellular process;regulation of cellular response to stress;regulation of cellular senescence;regulation of developmental process;regulatio…		cell part;intracellular non-membrane-bounded organelle;intracellular organelle;intracellular organelle part;intracellular part;membrane;non-membrane-bounded organelle;nuclear part;nucleolus;organelle;organelle part		b-Adrenergic Receptor kinase substrate motif;BARD1 BRCT domain binding motif;Casein kinase II substrate motif;G protein-coupled receptor kinase 1 substrate motif		0.999281	2.03e-64	171.83	2334400000	939860000	1394500000	361	31.4305
0.685283	-0.226921	-0.697144	-2.1706	0.0734162	-0.886396	-0.120939	0.207137	NaN	-1.34313	-0.996262	NaN	-0.740871	-2.30675	0.0716688	-0.941993	-0.128525	NaN	-1.42738	0.139392	-0.39679	-0.597162	0.33243	0.132058	-0.275686	NaN	0.340199	-0.711257	-2.21454	-0.90434	-0.123388	-1.01643	S	3	943	___1	biological regulation;cellular process;cellular response to chemical stimulus;cellular response to endogenous stimulus;cellular response to growth factor stimulus;cellular response to hormone stimulus;cellular response to organic substance;cellular response to steroid hormone stimulus;cellular response to stimulus;multi-organism process;negative regulation of biological process;negative regulatio…	binding;chromatin binding;enzyme inhibitor activity;enzyme regulator activity;phosphatase inhibitor activity;phosphatase regulator activity;protein binding transcription factor activity;protein phosphatase inhibitor activity;protein phosphatase regulator activity;RNA polymerase II transcription cofactor activity;RNA polymerase II transcription corepressor activity;RNA polymerase II transcription …	cell part;cell projection;cytoplasm;cytoplasmic part;dendrite;DNA-directed RNA polymerase complex;DNA-directed RNA polymerase II, core complex;intracellular membrane-bounded organelle;intracellular organelle;intracellular organelle part;intracellular part;macromolecular complex;membrane-bounded organelle;mitochondrion;neuron projection;nuclear DNA-directed RNA polymerase complex;nuclear part;nucl…		14-3-3 domain binding motif;Calmodulin-dependent protein kinase II substrate motif;Calmodulin-dependent protein kinase IV substrate motif;Casein kinase II substrate motif;Chk1 kinase substrate motif;G protein-coupled receptor kinase 1 substrate motif;PKA kinase substrate motif;PKC kinase substrate motif		0.994135	2.41e-182	226.04	1333600000	794920000	538680000	442	22.292
-0.119628	-0.027319	-0.234307	NaN	0.17662	-0.273849	-0.372776	0.409764	NaN	-0.892604	NaN	NaN	-0.249004	NaN	0.172416	-0.291025	-0.396158	NaN	-0.948591	0.768318	0.220871	1.00201	0.646651	NaN	0.285317	NaN	-0.264222	-0.239051	NaN	-0.279393	-0.380323	NaN	S	3	946	___1	ATP-dependent chromatin remodeling;biological regulation;cellular component organization;cellular component organization at cellular level;cellular component organization or biogenesis;cellular component organization or biogenesis at cellular level;cellular macromolecule metabolic process;cellular metabolic process;cellular nitrogen compound metabolic process;cellular process;chromatin assembly o…	binding;catalytic activity;cation binding;chromatin binding;deacetylase activity;DNA binding;histone deacetylase activity;hydrolase activity;hydrolase activity, acting on carbon-nitrogen (but not peptide) bonds;hydrolase activity, acting on carbon-nitrogen (but not peptide) bonds, in linear amides;ion binding;metal ion binding;nucleic acid binding;nucleic acid binding transcription factor activit…	cell part;chromatin;chromatin remodeling complex;chromosomal part;histone deacetylase complex;intracellular organelle part;intracellular part;macromolecular complex;membrane;nuclear chromatin;nuclear chromosome part;nuclear part;nucleoplasm;nucleoplasm part;NuRD complex;organelle part;protein complex;transcription factor complex;transcriptional repressor complex		Casein kinase II substrate motif;ERK1,2 kinase substrate motif;G protein-coupled receptor kinase 1 substrate motif;GSK-3, ERK1, ERK2, CDK5 substrate motif;WW domain binding motif	+	0.997394	4.65e-56	142.32	503410000	327390000	176020000	435	29.3196
-0.401732	0.0202876	-2.07321	-1.00916	0.962781	-2.47781	0.72454	-1.345	NaN	-1.54068	-2.2338	NaN	-2.20324	-1.07245	0.939865	-2.63323	0.707295	NaN	-1.63731	-0.919556	1.25113	-0.943751	NaN	0.0107967	-1.64891	NaN	0.0939303	-2.11518	-1.02959	-2.52797	0.772727	-2.27902	S	2	947	___1	activation of protein kinase activity;biological adhesion;biological regulation;cell adhesion;cell cycle;cell-cell adhesion;cellular macromolecule metabolic process;cellular metabolic process;cellular process;cellular protein metabolic process;cellular response to stimulus;cellular response to stress;homotypic cell-cell adhesion;intracellular protein kinase cascade;intracellular signal transducti…	adenyl nucleotide binding;adenyl ribonucleotide binding;ATP binding;binding;catalytic activity;identical protein binding;kinase activity;molecular transducer activity;nucleotide binding;phosphotransferase activity, alcohol group as acceptor;polo kinase kinase activity;protein binding;protein dimerization activity;protein homodimerization activity;protein kinase activity;protein serine/threonine k…	cell part;cytoplasm;extracellular membrane-bounded organelle;extracellular organelle;extracellular region part;extracellular vesicular exosome;intracellular part;membrane;membrane-bounded organelle;membrane-bounded vesicle;organelle;plasma membrane;vesicle		Casein kinase II substrate motif;PKA kinase substrate motif;PKC kinase substrate motif		1	1.48e-07	128.36	1096600000	676510000	420050000	13	42.0307
0.691225	1.27669	-0.117632	1.12499	0.958334	1.49416	1.63922	-0.40327	NaN	0.913832	1.23478	NaN	-0.12501	1.09821	0.935524	1.4586	1.6002	NaN	0.892082	-0.0132399	1.50743	0.693736	-0.20146	0.717272	-0.550751	NaN	NaN	-0.120014	1.19981	1.59353	1.74824	1.3169	S	2	947	___1	activation of protein kinase activity;biological adhesion;biological regulation;cell adhesion;cell cycle;cell-cell adhesion;cellular macromolecule metabolic process;cellular metabolic process;cellular process;cellular protein metabolic process;cellular response to stimulus;cellular response to stress;homotypic cell-cell adhesion;intracellular protein kinase cascade;intracellular signal transducti…	adenyl nucleotide binding;adenyl ribonucleotide binding;ATP binding;binding;catalytic activity;identical protein binding;kinase activity;molecular transducer activity;nucleotide binding;phosphotransferase activity, alcohol group as acceptor;polo kinase kinase activity;protein binding;protein dimerization activity;protein homodimerization activity;protein kinase activity;protein serine/threonine k…	cell part;cytoplasm;extracellular membrane-bounded organelle;extracellular organelle;extracellular region part;extracellular vesicular exosome;intracellular part;membrane;membrane-bounded organelle;membrane-bounded vesicle;organelle;plasma membrane;vesicle		ERK1,2 kinase substrate motif;GSK-3, ERK1, ERK2, CDK5 substrate motif;WW domain binding motif		1	1.12e-27	140.28	1426300000	1077500000	348760000	438	57.3663
-1.61867	NaN	-0.461718	-0.68803	NaN	-1.63147	-0.524677	-1.50364	-0.640483	NaN	-0.631949	-0.286683	-0.490679	-0.731185	NaN	-1.7338	-0.557587	-0.680657	NaN	1.71399	-0.229958	NaN	-2.4042	-0.137583	-0.591884	NaN	NaN	-0.471065	-0.701958	-1.6645	-0.535299	-0.644742	S	3	3886;6858;948	___1	activation of immune response;activation of protein kinase activity;activation of protein kinase C activity by G-protein coupled receptor protein signaling pathway;anatomical structure formation involved in morphogenesis;anatomical structure morphogenesis;angiogenesis;antigen receptor-mediated signaling pathway;apoptosis;biological adhesion;biological regulation;biosynthetic process;cell adhesion…	adenyl nucleotide binding;adenyl ribonucleotide binding;ATP binding;binding;catalytic activity;cation binding;identical protein binding;ion binding;kinase activity;metal ion binding;nucleotide binding;phosphotransferase activity, alcohol group as acceptor;protein binding;protein kinase activity;protein kinase C activity;protein serine/threonine kinase activity;purine nucleotide binding;purine rib…	cell cortex;cell junction;cell part;cell-cell junction;cytoplasm;cytoplasmic part;cytosol;Golgi apparatus;Golgi apparatus part;integral to membrane;integral to plasma membrane;intracellular membrane-bounded organelle;intracellular organelle;intracellular organelle part;intracellular part;intrinsic to membrane;intrinsic to plasma membrane;membrane;membrane part;membrane-bounded organelle;nuclear p…		G protein-coupled receptor kinase 1 substrate motif;GSK3 kinase substrate motif;PKA kinase substrate motif;PKC kinase substrate motif		1	0.000410513	76.228	209230000	100910000	108320000	706	46.3521
-0.450415	0.397051	1.28082	0.490739	-0.813596	0.0319132	0.00381886	0.156508	0.921174	0.228612	0.319095	0.0421388	1.25034	0.479059	-0.864628	0.0311536	0.00372797	0.899249	0.223171	0.39157	0.275586	0.60963	0.731863	0.106019	0.492135	0.286557	0.191761	1.36601	0.523376	0.0340357	0.00407284	0.340317	S	3	954	___1	cellular macromolecule metabolic process;cellular metabolic process;cellular process;cellular protein metabolic process;establishment of localization;establishment of localization in cell;establishment of protein localization;establishment of protein localization in mitochondrion;establishment of protein localization to organelle;intracellular protein transport;intracellular transport;macromolecu…	macromolecule transmembrane transporter activity;protein transmembrane transporter activity;protein transporter activity;substrate-specific transmembrane transporter activity;substrate-specific transporter activity;transmembrane transporter activity;transporter activity	cell part;cytoplasmic part;extracellular membrane-bounded organelle;extracellular organelle;extracellular region part;extracellular vesicular exosome;integral to membrane;intracellular membrane-bounded organelle;intracellular organelle;intracellular organelle part;intracellular part;intrinsic to membrane;macromolecular complex;membrane;membrane part;membrane-bounded organelle;membrane-bounded ves…		ERK1,2 kinase substrate motif;GSK-3, ERK1, ERK2, CDK5 substrate motif;PKA kinase substrate motif;PKC kinase substrate motif;WW domain binding motif		0.999997	1.44e-114	188.55	64448000000	42763000000	21685000000	91	55.8512
0.622609	0.642386	1.30564	0.558993	0.0821256	0.807113	0.166532	0.663335	NaN	0.948343	NaN	1.50608	1.27456	0.545688	0.0801709	0.787903	0.162568	NaN	0.925771	1.19536	0.950261	1.01216	0.615991	1.01257	0.968312	NaN	0.742491	1.39247	0.59617	0.860792	0.177607	NaN	S	3	966;967	___1	anatomical structure development;biological regulation;developmental process;lung alveolus development;negative regulation of biological process;negative regulation of biosynthetic process;negative regulation of cell communication;negative regulation of cell proliferation;negative regulation of cellular biosynthetic process;negative regulation of cellular macromolecule biosynthetic process;negati…	binding;cation binding;ion binding;metal ion binding;transition metal ion binding;zinc ion binding	cell part;intracellular membrane-bounded organelle;intracellular organelle;intracellular part;membrane-bounded organelle;nucleus;organelle		14-3-3 domain binding motif;Akt kinase substrate motif;Calmodulin-dependent protein kinase II substrate motif;MAPKAPK1 kinase substrate motif;PKA kinase substrate motif;PKC epsilon kinase substrate motif;PKC kinase substrate motif		1	1.08e-05	88.561	754060000	563390000	190670000	835	44.5108
1.09701	0.102568	-1.14488	-0.249295	0.35719	0.227987	0.895311	0.626668	NaN	-0.390895	-0.564339	0.659012	-1.21669	-0.264931	0.348688	0.222561	0.874002	NaN	-0.415413	0.710513	0.0707079	-0.0267846	0.396577	0.399897	0.135467	NaN	0.562315	-1.16805	-0.254341	0.24315	0.954856	-0.575764	S	3	970	___1		binding;enzyme binding;protein binding;small conjugating protein binding;transcription factor binding;ubiquitin binding;ubiquitin protein ligase binding	Cdc48p-Npl4p-Ufd1p AAA ATPase complex;cell part;cytoplasmic part;endoplasmic reticulum part;intracellular organelle part;intracellular part;macromolecular complex;membrane part;nuclear part;nucleoplasm;organelle part;protein complex		14-3-3 domain binding motif;b-Adrenergic Receptor kinase substrate motif;Calmodulin-dependent protein kinase II substrate motif;Casein kinase II substrate motif;G protein-coupled receptor kinase 1 substrate motif;Phosphorylase kinase substrate motif;PKA kinase substrate motif;PKC kinase substrate motif;Pyruvate dehydrogenase kinase substrate motif		0.986855	2.7e-104	204.04	1992100000	1357000000	635100000	280	19.955
-0.482522	-0.166458	-0.0816519	NaN	NaN	0.00804717	-0.28381	-0.235062	NaN	-0.028268	0.145464	NaN	-0.0867734	NaN	NaN	0.00785564	-0.301612	NaN	-0.0300411	NaN	-0.0293941	0.204635	0.0697898	-0.267298	-0.202265	NaN	-0.68421	-0.0833049	NaN	0.00858236	-0.289556	0.155138	S	3	975	___1	biosynthetic process;cellular biosynthetic process;cellular macromolecule biosynthetic process;cellular macromolecule metabolic process;cellular metabolic process;cellular nitrogen compound metabolic process;cellular process;gene expression;macromolecule biosynthetic process;macromolecule metabolic process;metabolic process;mRNA 3'-end processing;mRNA cleavage;mRNA metabolic process;mRNA polyaden…	basal RNA polymerase II transcription machinery binding;basal transcription machinery binding;binding;enzyme binding;mRNA binding;nucleic acid binding;protein binding;RNA binding;RNA polymerase binding;RNA polymerase core enzyme binding;RNA polymerase II core binding	cell part;cytoplasm;intracellular organelle part;intracellular part;macromolecular complex;mRNA cleavage factor complex;nuclear part;nucleoplasm;nucleoplasm part;organelle part;protein complex	mRNA surveillance pathway	Casein kinase I substrate motif;ERK1,2 kinase substrate motif;Growth associated histone HI kinase substrate motif;GSK-3, ERK1, ERK2, CDK5 substrate motif;WW domain binding motif		1	6.62e-62	185.99	944190000	584610000	359580000	705	126.073
0.232123	0.0745213	-0.0556988	0.424516	0.159049	0.192147	0.128947	0.463546	NaN	-0.0169709	0.0149177	NaN	-0.0591924	0.414412	0.155263	0.187574	0.125878	NaN	-0.0180353	0.305114	-0.0973497	-0.0622641	0.280406	0.133301	0.111437	NaN	0.298467	-0.0568264	0.452749	0.204926	0.137523	0.0159098	S	3	975	___1	biosynthetic process;cellular biosynthetic process;cellular macromolecule biosynthetic process;cellular macromolecule metabolic process;cellular metabolic process;cellular nitrogen compound metabolic process;cellular process;gene expression;macromolecule biosynthetic process;macromolecule metabolic process;metabolic process;mRNA 3'-end processing;mRNA cleavage;mRNA metabolic process;mRNA polyaden…	basal RNA polymerase II transcription machinery binding;basal transcription machinery binding;binding;enzyme binding;mRNA binding;nucleic acid binding;protein binding;RNA binding;RNA polymerase binding;RNA polymerase core enzyme binding;RNA polymerase II core binding	cell part;cytoplasm;intracellular organelle part;intracellular part;macromolecular complex;mRNA cleavage factor complex;nuclear part;nucleoplasm;nucleoplasm part;organelle part;protein complex	mRNA surveillance pathway	ERK1,2 kinase substrate motif;Growth associated histone HI kinase substrate motif;GSK-3, ERK1, ERK2, CDK5 substrate motif;PKA kinase substrate motif;PKC kinase substrate motif;WW domain binding motif		1	2.66e-08	112.17	571780000	362620000	209160000	777	64.2439
-0.426767	-0.262455	0.16074	NaN	NaN	0.18815	-0.374555	-0.599456	NaN	0.0969409	0.256796	-0.735582	0.156914	NaN	NaN	0.183672	-0.398049	NaN	0.0946336	-0.223727	-0.787815	0.265438	-0.272891	-0.545232	0.178303	NaN	0.00943567	0.171431	NaN	0.200664	-0.382138	0.273875	S	2	975	___1	biosynthetic process;cellular biosynthetic process;cellular macromolecule biosynthetic process;cellular macromolecule metabolic process;cellular metabolic process;cellular nitrogen compound metabolic process;cellular process;gene expression;macromolecule biosynthetic process;macromolecule metabolic process;metabolic process;mRNA 3'-end processing;mRNA cleavage;mRNA metabolic process;mRNA polyaden…	basal RNA polymerase II transcription machinery binding;basal transcription machinery binding;binding;enzyme binding;mRNA binding;nucleic acid binding;protein binding;RNA binding;RNA polymerase binding;RNA polymerase core enzyme binding;RNA polymerase II core binding	cell part;cytoplasm;intracellular organelle part;intracellular part;macromolecular complex;mRNA cleavage factor complex;nuclear part;nucleoplasm;nucleoplasm part;organelle part;protein complex	mRNA surveillance pathway	Cdc2 kinase substrate motif;CDK kinase substrate motif;CDK1,2,4,6 kinase substrate motif;ERK1,2 kinase substrate motif;Growth associated histone HI kinase substrate motif;GSK-3, ERK1, ERK2, CDK5 substrate motif;PKA kinase substrate motif;PKC kinase substrate motif;WW domain binding motif		1	2.27e-06	133.42	3685000000	2861200000	823800000	494	80.0141
0.340275	NaN	-0.970048	0.00273638	0.609752	-0.391264	0.107177	NaN	1.18009	-0.266194	-0.334235	NaN	-1.03089	0.00267125	0.595239	-0.415805	0.104626	1.15201	-0.28289	-0.000514178	NaN	-0.837611	-0.61626	0.0471311	-0.635356	NaN	NaN	-0.989686	0.00291837	-0.399185	0.114305	-0.341001	S	2	976	___1	biological regulation;biosynthetic process;cellular biosynthetic process;cellular macromolecule biosynthetic process;cellular macromolecule metabolic process;cellular metabolic process;cellular nitrogen compound metabolic process;cellular process;macromolecule biosynthetic process;macromolecule metabolic process;metabolic process;nitrogen compound metabolic process;nucleic acid metabolic process;…				14-3-3 domain binding motif;Calmodulin-dependent protein kinase I substrate motif;Calmodulin-dependent protein kinase II alpha substrate motif;Calmodulin-dependent protein kinase II substrate motif;Calmodulin-dependent protein kinase IV substrate motif;Casein kinase II substrate motif;Chk1 kinase substrate motif;Phosphorylase kinase substrate motif;PKA kinase substrate motif;PKC kinase substrate …		0.991024	0.000571408	95.618	685840000	413430000	272410000	1978	22.1342
0.413642	0.683993	-0.311406	-0.297589	0.615996	0.500816	0.835542	-0.604128	-0.0605192	0.293154	0.174097	0.0385965	-0.330938	-0.316255	0.601334	0.488896	0.815655	-0.0643151	0.286177	-0.18321	-0.980045	-0.426429	-0.611953	-0.505641	-0.54003	NaN	0.176258	-0.31771	-0.303614	0.534124	0.891112	0.185676	S	3	988	___1	antigen processing and presentation;antigen processing and presentation of exogenous antigen;antigen processing and presentation of exogenous peptide antigen;antigen processing and presentation of exogenous peptide antigen via MHC class II;antigen processing and presentation of peptide antigen;antigen processing and presentation of peptide antigen via MHC class I;antigen processing and presentati…	binding;calcium-dependent protein binding;protein binding	cell part;coated vesicle;coated vesicle membrane;COPII vesicle coat;cytoplasm;cytoplasmic membrane-bounded vesicle;cytoplasmic part;cytoplasmic vesicle;cytoplasmic vesicle membrane;cytoplasmic vesicle part;cytosol;endoplasmic reticulum;endoplasmic reticulum exit site;endoplasmic reticulum membrane;endoplasmic reticulum part;ER to Golgi transport vesicle;ER to Golgi transport vesicle membrane;Golg…	Protein processing in endoplasmic reticulum	b-Adrenergic Receptor kinase substrate motif;ERK1,2 kinase substrate motif;G protein-coupled receptor kinase 1 substrate motif;Growth associated histone HI kinase substrate motif;GSK-3, ERK1, ERK2, CDK5 substrate motif;PKA kinase substrate motif;PKC kinase substrate motif;WW domain binding motif	+	1	1.14e-37	125.45	7140900000	4644600000	2496400000	799	76.7701
-0.183353	-0.134565	-0.212552	0.018295	0.0512993	-0.26487	-0.568871	-0.60982	0.532874	-0.146425	-0.494991	0.254954	-0.225884	0.0178595	0.0500783	-0.281483	-0.604552	0.52019	-0.15561	0.106096	-0.422666	0.292583	-0.179455	-0.199381	-0.118399	-0.0529863	-0.658248	-0.216855	0.0195117	-0.270232	-0.580387	-0.505011	S	2	993	___1	biological regulation;catabolic process;cell proliferation;cellular catabolic process;cellular macromolecule catabolic process;cellular macromolecule metabolic process;cellular metabolic process;cellular nitrogen compound metabolic process;cellular process;cellular protein metabolic process;cellular response to stimulus;cellular response to stress;DNA metabolic process;DNA repair;intracellular re…	acid-amino acid ligase activity;binding;catalytic activity;cation binding;ion binding;ligase activity;ligase activity, forming carbon-nitrogen bonds;metal ion binding;nucleic acid binding;RNA binding;small conjugating protein ligase activity;transition metal ion binding;ubiquitin-protein ligase activity;ubiquitin-ubiquitin ligase activity;zinc ion binding	cell part;cytoplasm;intracellular membrane-bounded organelle;intracellular organelle;intracellular organelle part;intracellular part;membrane;membrane-bounded organelle;nuclear part;nucleoplasm;nucleus;organelle;organelle part	Ubiquitin mediated proteolysis	14-3-3 domain binding motif;ATM kinase substrate motif;Calmodulin-dependent protein kinase II substrate motif;Casein kinase II substrate motif;DNA dependent Protein kinase substrate motif;G protein-coupled receptor kinase 1 substrate motif;PAK2 kinase substrate motif;PKA kinase substrate motif;PKC epsilon kinase substrate motif;PKC kinase substrate motif		0.999999	1.3e-13	166.24	3025200000	1732000000	1293200000	1549	59.4526
-0.08211	0.275466	0.57072	NaN	0.0644479	-0.0254659	-0.338175	0.0486401	-0.299794	0.0542328	0.127991	0.476687	0.557136	NaN	0.062914	-0.0270632	-0.359386	-0.318598	0.052942	0.357828	-0.200756	0.725197	0.404298	0.0683732	0.65375	NaN	0.476462	0.608677	NaN	-0.0259815	-0.345021	0.136503	S	3	1012	___1	biological regulation;cellular macromolecule metabolic process;cellular metabolic process;cellular nitrogen compound metabolic process;cellular process;macromolecule metabolic process;metabolic process;mRNA metabolic process;mRNA processing;nitrogen compound metabolic process;nucleic acid metabolic process;nucleobase-containing compound metabolic process;primary metabolic process;regulation of bi…	binding;cation binding;ion binding;metal ion binding;nucleic acid binding;nucleic acid binding transcription factor activity;RNA binding;sequence-specific DNA binding transcription factor activity;transition metal ion binding;zinc ion binding	cell part;intracellular membrane-bounded organelle;intracellular organelle;intracellular organelle part;intracellular part;membrane-bounded organelle;nuclear part;nucleoplasm;nucleus;organelle;organelle part		14-3-3 domain binding motif;b-Adrenergic Receptor kinase substrate motif;Calmodulin-dependent protein kinase II substrate motif;Calmodulin-dependent protein kinase IV substrate motif;Casein kinase II substrate motif;Chk1 kinase substrate motif;PKA kinase substrate motif;PKC epsilon kinase substrate motif;PKC kinase substrate motif		1	7.64e-75	166.91	4249800000	2857600000	1392200000	120	83.0336
0.0474161	0.271282	0.632958	-0.100302	-0.270451	-0.262616	-0.0394297	-0.0775382	-0.0564433	-0.107692	0.282874	0.322674	0.617893	-0.106593	-0.287415	-0.279088	-0.0419029	-0.0599836	-0.114447	0.134777	0.255803	0.966828	0.78239	0.0908567	0.447612	NaN	-0.104894	0.675055	-0.102332	-0.267932	-0.0402279	0.301687	S	3	1012	___1	biological regulation;cellular macromolecule metabolic process;cellular metabolic process;cellular nitrogen compound metabolic process;cellular process;macromolecule metabolic process;metabolic process;mRNA metabolic process;mRNA processing;nitrogen compound metabolic process;nucleic acid metabolic process;nucleobase-containing compound metabolic process;primary metabolic process;regulation of bi…	binding;cation binding;ion binding;metal ion binding;nucleic acid binding;nucleic acid binding transcription factor activity;RNA binding;sequence-specific DNA binding transcription factor activity;transition metal ion binding;zinc ion binding	cell part;intracellular membrane-bounded organelle;intracellular organelle;intracellular organelle part;intracellular part;membrane-bounded organelle;nuclear part;nucleoplasm;nucleus;organelle;organelle part		b-Adrenergic Receptor kinase substrate motif;Casein kinase I substrate motif;Casein kinase II substrate motif;G protein-coupled receptor kinase 1 substrate motif;PKA kinase substrate motif;PKC kinase substrate motif		1	1.06e-115	200.95	12380000000	8168100000	4212200000	153	76.7954
-0.807193	-0.964526	-0.846329	-2.58092	NaN	0.154696	-1.02161	-0.68097	NaN	-1.05093	NaN	-0.99272	-0.899413	-2.74281	NaN	0.151014	-1.08569	NaN	-1.11685	NaN	-1.18755	-0.581454	NaN	NaN	0.407231	NaN	-3.01427	-0.863462	-2.63317	0.164985	-1.04229	NaN	S	2	1017	___1	anterograde axon cargo transport;antigen processing and presentation;antigen processing and presentation of exogenous antigen;antigen processing and presentation of exogenous peptide antigen;antigen processing and presentation of exogenous peptide antigen via MHC class II;antigen processing and presentation of peptide antigen;antigen processing and presentation of peptide antigen via MHC class II…	adenyl nucleotide binding;adenyl ribonucleotide binding;ATP binding;ATPase activity;binding;catalytic activity;DNA binding;hydrolase activity;hydrolase activity, acting on acid anhydrides;hydrolase activity, acting on acid anhydrides, in phosphorus-containing anhydrides;microtubule motor activity;motor activity;nucleic acid binding;nucleoside-triphosphatase activity;nucleotide binding;plus-end-di…	cell part;chromosome;cytoplasm;cytoplasmic part;cytoskeletal part;cytosol;intracellular non-membrane-bounded organelle;intracellular organelle;intracellular organelle part;intracellular part;kinesin complex;macromolecular complex;membrane;microtubule;microtubule associated complex;midbody;non-membrane-bounded organelle;nuclear matrix;nuclear part;nucleoplasm;organelle;organelle part;protein compl…		14-3-3 domain binding motif;Akt kinase substrate motif;Calmodulin-dependent protein kinase II substrate motif;Casein kinase II substrate motif;MAPKAPK1 kinase substrate motif;p70 Ribosomal S6 kinase substrate motif;Phosphorylase kinase substrate motif;PKA kinase substrate motif;PKC kinase substrate motif;ZIP kinase substrate motif		0.994229	0.000297566	97.597	274280000	154750000	119530000	801	23.4317
-0.880794	-0.771359	0.324465	0.469197	0.328086	0.44675	-0.0600676	-0.335871	1.5256	0.226604	0.470911	-0.79204	0.316742	0.458029	0.320277	0.436117	-0.0638353	1.48928	0.221211	NaN	NaN	-0.671303	0.00394017	NaN	0.146942	NaN	NaN	0.346044	0.500402	0.476462	-0.0612836	0.502229	S	3	1037	___1	biological regulation;biosynthetic process;cell differentiation;cellular biosynthetic process;cellular developmental process;cellular macromolecule biosynthetic process;cellular macromolecule metabolic process;cellular metabolic process;cellular nitrogen compound metabolic process;cellular process;developmental process;macromolecule biosynthetic process;macromolecule metabolic process;metabolic p…	binding;cation binding;DNA binding;enzyme binding;histone acetyltransferase binding;ion binding;metal ion binding;nucleic acid binding;protein binding	cell part;intracellular membrane-bounded organelle;intracellular organelle;intracellular part;membrane-bounded organelle;nucleus;organelle		b-Adrenergic Receptor kinase substrate motif;BARD1 BRCT domain binding motif;Casein kinase II substrate motif;G protein-coupled receptor kinase 1 substrate motif;GSK3 kinase substrate motif		1	7.52e-35	120.71	1957800000	1271800000	686070000	337	82.0459
0.734584	0.0550014	0.866161	1.55327	NaN	1.33319	1.09722	0.677359	NaN	1.40256	0.951932	NaN	0.845545	1.5163	NaN	1.30146	1.07111	NaN	1.36918	NaN	0.572116	-0.186472	0.597475	0.470704	0.969963	NaN	NaN	0.923767	1.65657	1.42186	1.17019	1.01524	S	3	1037	___1	biological regulation;biosynthetic process;cell differentiation;cellular biosynthetic process;cellular developmental process;cellular macromolecule biosynthetic process;cellular macromolecule metabolic process;cellular metabolic process;cellular nitrogen compound metabolic process;cellular process;developmental process;macromolecule biosynthetic process;macromolecule metabolic process;metabolic p…	binding;cation binding;DNA binding;enzyme binding;histone acetyltransferase binding;ion binding;metal ion binding;nucleic acid binding;protein binding	cell part;intracellular membrane-bounded organelle;intracellular organelle;intracellular part;membrane-bounded organelle;nucleus;organelle		Casein kinase I substrate motif;ERK1,2 kinase substrate motif;GSK-3, ERK1, ERK2, CDK5 substrate motif;WW domain binding motif	+	1	5.06e-75	176.34	721720000	531630000	190090000	549	86.182
0.488778	NaN	-1.10829	NaN	-0.164978	-2.09739	-0.441249	-1.35652	NaN	-0.83823	2.18702	NaN	-1.17781	NaN	-0.175326	-2.22895	-0.468926	NaN	-0.890807	NaN	0.133825	-1.95852	NaN	NaN	-1.05979	NaN	-0.983257	-1.13073	NaN	-2.13985	-0.450182	2.33247	S	3	1045	___1	alcohol biosynthetic process;alcohol metabolic process;amino sugar biosynthetic process;amino sugar metabolic process;anatomical structure development;biosynthetic process;carbohydrate biosynthetic process;carbohydrate metabolic process;cellular biosynthetic process;cellular carbohydrate biosynthetic process;cellular carbohydrate metabolic process;cellular macromolecule metabolic process;cellular…	binding;catalytic activity;cation binding;intramolecular transferase activity;intramolecular transferase activity, phosphotransferases;ion binding;isomerase activity;magnesium ion binding;metal ion binding;phosphoacetylglucosamine mutase activity;phosphoglucomutase activity	cell part;cytoplasmic part;cytosol;intracellular part	Amino sugar and nucleotide sugar metabolism			0.998861	8.55e-64	150.06	524350000	265070000	259290000	64	29.4316
-0.288098	0.306631	-0.590305	-0.550485	-0.285945	-0.0952882	0.0496171	-0.0488755	0.191954	NaN	-0.382014	NaN	-0.627331	-0.585013	-0.30388	-0.101265	0.0484362	0.187385	NaN	0.0210219	-0.0651272	-0.110209	-0.213397	-0.487902	NaN	NaN	0.228077	-0.602255	-0.561629	-0.0972172	0.052917	-0.389748	S	2	1048	___1	assembly of spliceosomal tri-snRNP;biological regulation;cellular component assembly;cellular component assembly at cellular level;cellular component organization;cellular component organization at cellular level;cellular component organization or biogenesis;cellular component organization or biogenesis at cellular level;cellular macromolecular complex assembly;cellular macromolecular complex sub…	binding;ribonucleoprotein binding	cell part;cytoplasm;intracellular membrane-bounded organelle;intracellular organelle;intracellular organelle part;intracellular part;macromolecular complex;membrane-bounded organelle;nuclear part;nucleoplasm;nucleus;organelle;organelle part;ribonucleoprotein complex;small nuclear ribonucleoprotein complex;U5 snRNP		DNA dependent Protein kinase substrate motif		0.76024	3.33e-08	113.1	2426400000	1366800000	1059600000	194	5.01174
-0.262802	0.306631	-0.179611	-0.139158	-0.332005	-0.0952882	-0.158101	-0.0488755	0.191954	-0.617442	0.0709078	-0.121821	-0.190877	-0.147886	-0.352829	-0.101265	-0.168018	0.187385	-0.65617	0.0210219	0.0976769	-0.110209	-0.164374	-0.467666	0.0145057	NaN	-0.491384	-0.183247	-0.141975	-0.0972172	-0.161302	0.0756236	S	2	1048	___1	assembly of spliceosomal tri-snRNP;biological regulation;cellular component assembly;cellular component assembly at cellular level;cellular component organization;cellular component organization at cellular level;cellular component organization or biogenesis;cellular component organization or biogenesis at cellular level;cellular macromolecular complex assembly;cellular macromolecular complex sub…	binding;ribonucleoprotein binding	cell part;cytoplasm;intracellular membrane-bounded organelle;intracellular organelle;intracellular organelle part;intracellular part;macromolecular complex;membrane-bounded organelle;nuclear part;nucleoplasm;nucleus;organelle;organelle part;ribonucleoprotein complex;small nuclear ribonucleoprotein complex;U5 snRNP		Cdc2 kinase substrate motif;CDK kinase substrate motif;CDK1,2,4,6 kinase substrate motif;ERK1,2 kinase substrate motif;Growth associated histone HI kinase substrate motif;GSK-3, ERK1, ERK2, CDK5 substrate motif;MDC1 BRCT domain binding motif;Plk1 PBD domain binding motif;WW domain binding motif		0.95604	2.63e-14	135.81	4336500000	2462900000	1873500000	195	13.3742
2.04932	-1.11329	-2.26312	2.36148	NaN	-0.0851443	-1.27315	2.10358	NaN	-3.89137	-4.54926	NaN	-2.40507	2.30528	NaN	-0.0904848	-1.353	NaN	-4.13545	1.3912	1.35784	0.351976	0.404847	1.75564	-0.804608	NaN	NaN	-2.30894	2.51854	-0.086868	-1.29892	-4.64135	S	2	1051	___1	anatomical structure development;biological regulation;cellular component organization;cellular component organization at cellular level;cellular component organization or biogenesis;cellular component organization or biogenesis at cellular level;cellular process;cytoskeleton organization;developmental process;muscle tissue development;organelle organization;positive regulation of biological proc…	actin binding;actin filament binding;binding;cytoskeletal protein binding;protein binding	actin cytoskeleton;adherens junction;anchoring junction;cell division site part;cell junction;cell part;cell projection;cell-substrate adherens junction;cell-substrate junction;cleavage furrow;contractile fiber part;costamere;cytoplasm;cytoplasmic part;cytoskeletal part;cytoskeleton;focal adhesion;intracellular membrane-bounded organelle;intracellular non-membrane-bounded organelle;intracellular …		ERK1,2 kinase substrate motif;G protein-coupled receptor kinase 1 substrate motif;Growth associated histone HI kinase substrate motif;GSK-3, ERK1, ERK2, CDK5 substrate motif;PKA kinase substrate motif;PKC kinase substrate motif;WW domain binding motif		1	1.19e-56	194.67	1376900000	525660000	851190000	245	78.8409
2.25786	0.790922	-0.354757	1.80178	2.26279	1.61455	2.24259	2.19098	3.82911	1.77233	1.83576	3.29055	-0.377008	1.75889	2.20893	1.57612	2.18922	3.73798	1.73014	2.26553	2.28269	0.781037	0.0602093	1.42386	1.74263	-0.164483	1.09147	-0.361938	1.92161	1.72193	2.39174	1.95786	S	2	1058	___1	actin cytoskeleton organization;actin filament severing;actin filament-based process;biological regulation;cell migration;cell motility;cellular component movement;cellular component organization;cellular component organization at cellular level;cellular component organization or biogenesis;cellular component organization or biogenesis at cellular level;cellular process;cellular response to stimu…	actin binding;actin filament binding;binding;cytoskeletal protein binding;enzyme binding;GTPase activating protein binding;GTPase binding;protein binding;Rac GTPase binding;Ras GTPase binding;Rho GTPase binding;small GTPase binding	bleb;cell cortex;cell part;cell projection;cytoplasmic membrane-bounded vesicle;cytoplasmic part;cytoplasmic vesicle;cytosol;endocytic vesicle;extracellular membrane-bounded organelle;extracellular organelle;extracellular region part;extracellular vesicular exosome;intracellular membrane-bounded organelle;intracellular organelle;intracellular part;membrane;membrane-bounded organelle;membrane-boun…		14-3-3 domain binding motif;b-Adrenergic Receptor kinase substrate motif;Calmodulin-dependent protein kinase II substrate motif;Calmodulin-dependent protein kinase IV substrate motif;Chk1 kinase substrate motif;G protein-coupled receptor kinase 1 substrate motif;PAK2 kinase substrate motif;PKA kinase substrate motif;PKC epsilon kinase substrate motif;PKC kinase substrate motif		1	5.31e-17	145.49	10127000000	8931600000	1195800000	624	134.058
1.66527	0.458149	-0.665919	1.57318	1.56582	1.33275	2.04697	1.59276	2.377	1.64334	1.20414	2.06176	-0.707688	1.53574	1.52855	1.30103	1.99824	2.32043	1.60422	1.30858	1.76347	0.44011	-0.092683	1.08765	0.930616	NaN	1.06212	-0.6794	1.67781	1.42139	2.1831	1.28423	S	3	1058	___1	actin cytoskeleton organization;actin filament severing;actin filament-based process;biological regulation;cell migration;cell motility;cellular component movement;cellular component organization;cellular component organization at cellular level;cellular component organization or biogenesis;cellular component organization or biogenesis at cellular level;cellular process;cellular response to stimu…	actin binding;actin filament binding;binding;cytoskeletal protein binding;enzyme binding;GTPase activating protein binding;GTPase binding;protein binding;Rac GTPase binding;Ras GTPase binding;Rho GTPase binding;small GTPase binding	bleb;cell cortex;cell part;cell projection;cytoplasmic membrane-bounded vesicle;cytoplasmic part;cytoplasmic vesicle;cytosol;endocytic vesicle;extracellular membrane-bounded organelle;extracellular organelle;extracellular region part;extracellular vesicular exosome;intracellular membrane-bounded organelle;intracellular organelle;intracellular part;membrane;membrane-bounded organelle;membrane-boun…		Cdc2 kinase substrate motif;CDK kinase substrate motif;CDK1,2,4,6 kinase substrate motif;ERK1, ERK2, SAPK, CDK5 and GSK3 kinase substrate motif;ERK1,2 kinase substrate motif;G protein-coupled receptor kinase 1 substrate motif;Growth associated histone HI kinase substrate motif;GSK-3, ERK1, ERK2, CDK5 substrate motif;WW domain binding motif		1	7.24e-144	196.15	6179400000	5040300000	1139100000	1031	45.4378
2.93873	1.11043	0.683302	3.62707	2.06284	2.59419	NaN	2.59867	NaN	2.00097	2.14277	NaN	0.667039	3.54074	2.01374	2.53245	NaN	NaN	1.95335	NaN	2.93572	NaN	NaN	1.98608	1.90307	NaN	NaN	0.728747	3.8683	2.76673	NaN	2.28528	S	3	1058	___1	actin cytoskeleton organization;actin filament severing;actin filament-based process;biological regulation;cell migration;cell motility;cellular component movement;cellular component organization;cellular component organization at cellular level;cellular component organization or biogenesis;cellular component organization or biogenesis at cellular level;cellular process;cellular response to stimu…	actin binding;actin filament binding;binding;cytoskeletal protein binding;enzyme binding;GTPase activating protein binding;GTPase binding;protein binding;Rac GTPase binding;Ras GTPase binding;Rho GTPase binding;small GTPase binding	bleb;cell cortex;cell part;cell projection;cytoplasmic membrane-bounded vesicle;cytoplasmic part;cytoplasmic vesicle;cytosol;endocytic vesicle;extracellular membrane-bounded organelle;extracellular organelle;extracellular region part;extracellular vesicular exosome;intracellular membrane-bounded organelle;intracellular organelle;intracellular part;membrane;membrane-bounded organelle;membrane-boun…		Casein kinase II substrate motif;Plk1 kinase substrate motif;Pyruvate dehydrogenase kinase substrate motif		0.999995	9.19e-49	169.92	979140000	877010000	102130000	184	52.9282
1.49176	NaN	NaN	1.66878	1.1527	2.98104	0.813763	0.393361	NaN	3.03106	2.17069	1.73168	NaN	1.62906	1.12526	2.91009	0.794394	NaN	2.95891	2.02607	1.22961	-0.313283	NaN	0.442015	1.3852	NaN	NaN	NaN	1.77977	3.1793	0.867884	2.31506	S	2	1067	___1	ATP metabolic process;biosynthetic process;cellular biosynthetic process;cellular metabolic process;cellular nitrogen compound biosynthetic process;cellular nitrogen compound metabolic process;cellular process;coenzyme biosynthetic process;coenzyme metabolic process;cofactor biosynthetic process;cofactor metabolic process;heterocycle biosynthetic process;heterocycle metabolic process;metabolic pr…	adenyl nucleotide binding;adenyl ribonucleotide binding;ATP binding;binding;catalytic activity;cation binding;ion binding;kinase activity;metal ion binding;NAD+ kinase activity;nucleotide binding;phosphotransferase activity, alcohol group as acceptor;purine nucleotide binding;purine ribonucleoside triphosphate binding;purine ribonucleotide binding;ribonucleotide binding;transferase activity;trans…	cell part;cytoplasmic part;cytosol;intracellular part	Nicotinate and nicotinamide metabolism	14-3-3 domain binding motif;Calmodulin-dependent protein kinase II alpha substrate motif;Calmodulin-dependent protein kinase II substrate motif;Calmodulin-dependent protein kinase IV substrate motif;Doublecortin kinase-1 kinase substrate motif;G protein-coupled receptor kinase 1 substrate motif;Phosphorylase kinase substrate motif;PKA kinase substrate motif;PKC kinase substrate motif;ZIP kinase s…		1	3.47e-14	103.13	2327400000	1917000000	410390000	64	84.8973
NaN	0.390627	NaN	2.75641	2.16209	3.25523	2.21433	2.14469	NaN	3.15209	NaN	2.76956	NaN	2.6908	2.11063	3.17775	2.16162	NaN	3.07707	1.53557	2.39582	NaN	NaN	2.08723	1.85894	NaN	NaN	NaN	2.93973	3.47172	2.3616	NaN	S	2	1067	___1	ATP metabolic process;biosynthetic process;cellular biosynthetic process;cellular metabolic process;cellular nitrogen compound biosynthetic process;cellular nitrogen compound metabolic process;cellular process;coenzyme biosynthetic process;coenzyme metabolic process;cofactor biosynthetic process;cofactor metabolic process;heterocycle biosynthetic process;heterocycle metabolic process;metabolic pr…	adenyl nucleotide binding;adenyl ribonucleotide binding;ATP binding;binding;catalytic activity;cation binding;ion binding;kinase activity;metal ion binding;NAD+ kinase activity;nucleotide binding;phosphotransferase activity, alcohol group as acceptor;purine nucleotide binding;purine ribonucleoside triphosphate binding;purine ribonucleotide binding;ribonucleotide binding;transferase activity;trans…	cell part;cytoplasmic part;cytosol;intracellular part	Nicotinate and nicotinamide metabolism	14-3-3 domain binding motif;Akt kinase substrate motif;Calmodulin-dependent protein kinase II substrate motif;Casein kinase II substrate motif;G protein-coupled receptor kinase 1 substrate motif;MAPKAPK1 kinase substrate motif;MAPKAPK2 kinase substrate motif;PKA kinase substrate motif;PKC kinase substrate motif		0.99924	1.13e-25	155.17	706890000	641230000	65657000	48	33.7439
0.811724	0.60419	1.17062	NaN	0.543096	1.4172	0.483568	1.32224	1.1199	2.15411	0.298493	1.20353	1.14276	NaN	0.530169	1.38347	0.472058	1.09325	2.10284	1.05209	0.219578	-0.44998	0.797288	NaN	0.894413	NaN	0.58976	1.24848	NaN	1.51146	0.515728	0.318345	S	2	1095;1096	___1			cell part;cytoplasmic part;endosomal part;endosome membrane;integral to membrane;intracellular membrane-bounded organelle;intracellular organelle;intracellular organelle part;intracellular part;intrinsic to membrane;late endosome membrane;lysosomal membrane;membrane;membrane part;membrane-bounded organelle;organelle;organelle membrane;organelle part;vacuolar membrane;vacuolar part		14-3-3 domain binding motif;b-Adrenergic Receptor kinase substrate motif;Calmodulin-dependent protein kinase II alpha substrate motif;Calmodulin-dependent protein kinase II substrate motif;Calmodulin-dependent protein kinase IV substrate motif;Casein kinase II substrate motif;Chk1 kinase substrate motif;PKA kinase substrate motif;PKC kinase substrate motif		0.999956	0.000635731	102.07	670570000	519050000	151520000	39	43.5709
0.152971	0.394633	1.06787	0.350093	-2.47031	0.0499609	0.140112	-0.35694	-0.0271428	-0.0961767	-1.05552	NaN	1.04246	0.34176	-2.62525	0.0487718	0.136777	-0.0288453	-0.102209	0.790551	NaN	0.263264	1.39328	0.419208	0.0562472	NaN	0.191135	1.13889	0.373376	0.0532837	0.14943	-1.07689	S	2	1131	___1	anatomical structure development;ATP-dependent chromatin remodeling;biological regulation;biosynthetic process;cellular biosynthetic process;cellular component organization;cellular component organization at cellular level;cellular component organization or biogenesis;cellular component organization or biogenesis at cellular level;cellular macromolecule biosynthetic process;cellular macromolecule…	binding;chromatin binding;DNA binding;methyl-CpG binding;nucleic acid binding;nucleotide binding;sequence-specific DNA binding	cell part;chromatin;chromatin remodeling complex;chromosomal part;cytoplasm;heterochromatin;histone deacetylase complex;intracellular organelle part;intracellular part;macromolecular complex;nuclear chromatin;nuclear chromosome part;nuclear part;nucleoplasm;nucleoplasm part;NuRD complex;organelle part;protein complex;transcriptional repressor complex		14-3-3 domain binding motif;Akt kinase substrate motif;AMP-activated protein kinase substrate motif;b-Adrenergic Receptor kinase substrate motif;Calmodulin-dependent protein kinase II substrate motif;HMGCoA Reductase kinase substrate motif;MAPKAPK1 kinase substrate motif;PKA kinase substrate motif;PKC kinase substrate motif		0.969824	1.33e-09	129.54	439910000	269180000	170740000	53	15.0704
0.713303	0.349189	-1.61921	-0.968251	0.709726	0.126517	0.605242	0.763807	-0.750513	0.0649629	-0.534871	0.0659295	-1.72077	-1.02898	0.692833	0.123506	0.590837	-0.797588	0.0634167	0.425915	-0.796241	-0.777493	-0.564086	0.110122	-0.127836	NaN	-0.0473027	-1.65199	-0.987852	0.134932	0.645495	-0.545699	S	2	1137	___1	activation of immune response;activation of innate immune response;adaptive immune response;adaptive immune response based on somatic recombination of immune receptors built from immunoglobulin superfamily domains;anatomical structure formation involved in morphogenesis;antigen receptor-mediated signaling pathway;apoptosis;B cell apoptosis;B cell mediated immunity;biological regulation;cell death…	binding;enzyme binding;kinase binding;NF-kappaB binding;protease binding;protein binding;protein binding transcription factor activity;protein C-terminus binding;protein kinase B binding;protein kinase binding;protein self-association;small conjugating protein binding;transcription coactivator activity;transcription cofactor activity;transcription factor binding;transcription factor binding trans…	CBM complex;cell part;cytoplasm;cytoplasmic microtubule;cytoplasmic part;cytoskeletal part;cytosol;immunological synapse;intracellular membrane-bounded organelle;intracellular organelle;intracellular organelle part;intracellular part;lysosome;lytic vacuole;macromolecular complex;membrane;membrane part;membrane raft;membrane-bounded organelle;microtubule;nucleus;organelle;organelle part;perinuclea…	B cell receptor signaling pathway;ko05152;T cell receptor signaling pathway	14-3-3 domain binding motif;Calmodulin-dependent protein kinase II substrate motif;Calmodulin-dependent protein kinase IV substrate motif;Casein kinase II substrate motif;Chk1 kinase substrate motif;MAPKAPK2 kinase substrate motif;PKA kinase substrate motif;PKC kinase substrate motif		0.999984	8.52e-22	148.52	371320000	238040000	133280000	138	47.9418
NaN	2.22037	-0.750592	-5.5911	NaN	0.723568	-6.25893	0.97382	-0.76201	1.69352	1.37688	NaN	-0.797671	-5.94179	NaN	0.706346	-6.65151	-0.809806	1.65321	1.09844	2.04088	NaN	-5.46348	-7.10617	NaN	NaN	-0.621457	-0.765787	-5.70428	0.771691	-6.38564	1.46845	S	2	1212;1213;1338;1546;2155	___1	antibacterial humoral response;antigen processing and presentation;antigen processing and presentation of endogenous antigen;antigen processing and presentation of endogenous peptide antigen;antigen processing and presentation of endogenous peptide antigen via MHC class I;antigen processing and presentation of endogenous peptide antigen via MHC class I via ER pathway;antigen processing and presen…	antigen binding;beta-2-microglobulin binding;binding;peptide antigen binding;peptide binding;protein binding;protein complex binding;receptor binding;T cell receptor binding;TAP binding	cell part;cell surface;coated vesicle membrane;cytoplasmic part;cytoplasmic vesicle membrane;cytoplasmic vesicle part;early endosome membrane;endocytic vesicle membrane;endoplasmic reticulum;endoplasmic reticulum exit site;endoplasmic reticulum part;endosomal part;endosome membrane;ER to Golgi transport vesicle membrane;extracellular membrane-bounded organelle;extracellular organelle;extracellula…	Allograft rejection;Antigen processing and presentation;Autoimmune thyroid disease;Cell adhesion molecules (CAMs);Endocytosis;Graft-versus-host disease;Natural killer cell mediated cytotoxicity;Phagosome;Type I diabetes mellitus;Viral myocarditis	Casein kinase II substrate motif;G protein-coupled receptor kinase 1 substrate motif;PKA kinase substrate motif;PKC kinase substrate motif		0.987841	2.22e-114	180.4	10133000000	7111000000	3021900000	343	19.0979
-0.972815	-2.11132	-1.01276	-1.48549	1.09607	1.58068	0.114916	-1.81652	-2.6204	0.879634	0.00660359	-3.46895	-1.07629	-1.57867	1.06998	1.54305	0.112181	-2.78476	0.858697	-2.2966	-4.05075	-2.14705	-2.96939	-0.348818	-1.20772	1.16773	0.397162	-1.03327	-1.51556	1.6858	0.122559	0.00704277	S	2	1223;1224	___1	anatomical structure development;apoptosis;biological regulation;cardiac cell development;cardiac muscle cell development;cell cycle;cell cycle process;cell death;cell development;cellular component disassembly;cellular component disassembly at cellular level;cellular component disassembly involved in apoptosis;cellular component organization;cellular component organization at cellular level;cell…	structural molecule activity	cell part;cytoplasm;cytoplasmic part;cytoskeletal part;cytosol;envelope;intermediate filament;intracellular membrane-bounded organelle;intracellular organelle;intracellular organelle part;intracellular part;lamin filament;macromolecular complex;membrane;membrane-bounded organelle;nuclear body;nuclear envelope;nuclear lamina;nuclear membrane;nuclear part;nuclear speck;nucleoplasm;nucleoplasm part;…	Arrhythmogenic right ventricular cardiomyopathy (ARVC);Dilated cardiomyopathy;Hypertrophic cardiomyopathy (HCM)	Casein kinase II substrate motif;ERK1,2 kinase substrate motif;G protein-coupled receptor kinase 1 substrate motif;GSK-3, ERK1, ERK2, CDK5 substrate motif;PKA kinase substrate motif;PKC kinase substrate motif;WW domain binding motif		0.999992	2.31e-29	165.93	27356000000	17400000000	9956500000	390	51.0441
0.207988	1.0514	-0.732611	-0.35003	1.05943	-0.634702	0.824056	-0.267502	NaN	-0.315275	NaN	0.253211	-0.778563	-0.371985	1.03421	-0.674512	0.804442	NaN	-0.335051	-0.0161345	NaN	-0.774745	0.140155	0.60374	-0.809505	NaN	0.49698	-0.747443	-0.357116	-0.647551	0.878861	NaN	S	2	1233	___1	aging;anatomical structure development;axon ensheathment;biological regulation;cell communication;cell-cell signaling;cellular component organization;cellular component organization or biogenesis;cellular process;central nervous system development;developmental process;ensheathment of neurons;immune response;immune system process;membrane organization;myelination;negative regulation of axonogenes…	structural constituent of myelin sheath;structural molecule activity	axon part;cell body;cell part;cell projection part;compact myelin;internode region of axon;intracellular membrane-bounded organelle;intracellular organelle;intracellular part;membrane;membrane-bounded organelle;neuronal cell body;nucleus;organelle;plasma membrane		14-3-3 domain binding motif;Calmodulin-dependent protein kinase II substrate motif;Calmodulin-dependent protein kinase IV substrate motif;Chk1 kinase substrate motif;G protein-coupled receptor kinase 1 substrate motif;PKA kinase substrate motif;PKC kinase substrate motif		1	1.45e-14	97.271	2244200000	1479800000	764440000	96	52.3906
-1.56047	NaN	-0.908375	NaN	-2.24024	NaN	-1.10775	-2.7635	NaN	NaN	-1.8584	NaN	-0.965351	NaN	-2.38076	NaN	-1.17723	NaN	NaN	-2.63801	-2.13379	-0.569318	-1.64644	-3.46518	-3.06626	NaN	NaN	-0.926764	NaN	NaN	-1.13017	-1.89602	S	3	1268	___1	aging;alcohol metabolic process;associative learning;behavior;biological regulation;biosynthetic process;cell differentiation;cellular biosynthetic process;cellular component assembly;cellular component organization;cellular component organization or biogenesis;cellular developmental process;cellular ketone metabolic process;cellular lipid metabolic process;cellular metabolic process;cellular nit…	binding;catalytic activity;coenzyme binding;cofactor binding;hydroxymethylglutaryl-CoA reductase (NADPH) activity;hydroxymethylglutaryl-CoA reductase activity;NADP binding;NADPH binding;nucleotide binding;oxidoreductase activity;oxidoreductase activity, acting on CH-OH group of donors;oxidoreductase activity, acting on the CH-OH group of donors, NAD or NADP as acceptor	cell part;cytoplasmic part;endoplasmic reticulum;endoplasmic reticulum membrane;endoplasmic reticulum part;integral to membrane;intracellular membrane-bounded organelle;intracellular organelle;intracellular organelle part;intracellular part;intrinsic to membrane;membrane;membrane part;membrane-bounded organelle;microbody;microbody membrane;microbody part;organelle;organelle membrane;organelle par…	Bile secretion;Terpenoid backbone biosynthesis	AMP-activated protein kinase substrate motif;HMGCoA Reductase kinase substrate motif		1	1.66e-12	113.88	182330000	61180000	121150000	819	87.2835
0.396419	-1.00319	-1.83109	-1.19776	0.176583	-1.02242	0.122315	-0.074376	1.23397	-1.4482	-0.572385	-0.334495	-1.94594	-1.27289	0.17238	-1.08655	0.119404	1.2046	-1.53904	-0.30427	-0.155044	-0.991592	NaN	-0.648856	-0.685731	NaN	-0.574365	-1.86816	-1.22201	-1.04312	0.13045	-0.583972	S	3	1270	___1	activation of adenylate cyclase activity;activation of immune response;activation of innate immune response;activation of MAPKK activity;activation of protein kinase activity;anatomical structure development;apoptosis;axon guidance;biological regulation;blood coagulation;cell activation;cell communication;cell death;cell proliferation;cell surface receptor linked signaling pathway;cell-cell signa…	adenyl nucleotide binding;adenyl ribonucleotide binding;ATP binding;binding;catalytic activity;cation binding;identical protein binding;ion binding;kinase activity;MAP kinase kinase kinase activity;metal ion binding;molecular transducer activity;nucleotide binding;phosphotransferase activity, alcohol group as acceptor;protein binding;protein kinase activity;protein serine/threonine kinase activit…	cell part;cell projection;cytoplasm;cytoplasmic part;cytosol;Golgi apparatus;intracellular membrane-bounded organelle;intracellular organelle;intracellular organelle part;intracellular part;membrane;membrane-bounded organelle;mitochondrial membrane;mitochondrial outer membrane;mitochondrial part;nucleus;organelle;organelle membrane;organelle outer membrane;organelle part;outer membrane;plasma mem…	Acute myeloid leukemia;B cell receptor signaling pathway;Bladder cancer;Chemokine signaling pathway;Chronic myeloid leukemia;Colorectal cancer;Endometrial cancer;ErbB signaling pathway;Fc epsilon RI signaling pathway;Fc gamma R-mediated phagocytosis;Focal adhesion;Gap junction;Glioma;GnRH signaling pathway;Hepatitis C;Insulin signaling pathway;ko05152;Long-term depression;Long-term potentiation;M…	14-3-3 domain binding motif;Calmodulin-dependent protein kinase II substrate motif;Calmodulin-dependent protein kinase IV substrate motif;PAK2 kinase substrate motif;PKA kinase substrate motif;PKA, PKG kinase substrate motif;PKC epsilon kinase substrate motif;PKC kinase substrate motif;PKG kinase substrate motif		1	4.6e-48	168.64	1550300000	887240000	663010000	43	79.5465
1.09492	1.37231	NaN	0.227917	1.26102	-0.50214	1.27221	0.861966	NaN	0.304205	NaN	2.12259	NaN	0.222493	1.23101	-0.533635	1.24193	NaN	0.296965	NaN	1.72	-0.336077	-0.30777	0.775795	0.737466	NaN	NaN	NaN	0.243076	-0.512305	1.35682	NaN	S	3	1274	___1	actin cytoskeleton organization;actin filament organization;actin filament-based process;alcohol biosynthetic process;alcohol catabolic process;alcohol metabolic process;anatomical structure homeostasis;ATP biosynthetic process;ATP metabolic process;biological regulation;biosynthetic process;blood coagulation;carbohydrate biosynthetic process;carbohydrate catabolic process;carbohydrate metabolic …	actin binding;aldehyde-lyase activity;binding;carbohydrate binding;carbon-carbon lyase activity;catalytic activity;cytoskeletal protein binding;fructose binding;fructose-bisphosphate aldolase activity;identical protein binding;lyase activity;monosaccharide binding;protein binding;sugar binding;tubulin binding	actin cytoskeleton;cell part;contractile fiber part;cytoplasmic membrane-bounded vesicle lumen;cytoplasmic part;cytoplasmic vesicle part;cytoskeleton;cytosol;extracellular membrane-bounded organelle;extracellular organelle;extracellular region;extracellular region part;extracellular space;extracellular vesicular exosome;I band;intracellular membrane-bounded organelle;intracellular non-membrane-bo…	Carbon fixation in photosynthetic organisms;Fructose and mannose metabolism;Glycolysis / Gluconeogenesis;Pentose phosphate pathway			0.985226	2.37e-27	135.09	465420000	340220000	125200000	39	19.0271
1.44918	2.06101	1.9709	2.24058	0.95023	2.42387	2.12668	2.02218	NaN	1.88581	2.6392	2.38411	1.92399	2.18725	0.927614	2.36618	2.07606	NaN	1.84092	1.7229	2.13583	0.172319	2.67005	1.83326	0.986992	NaN	1.23856	2.10198	2.38959	2.58508	2.26812	2.81472	S	4	1288	___1	activation of MAPK activity;adaptive immune response;adaptive immune response based on somatic recombination of immune receptors built from immunoglobulin superfamily domains;antigen processing and presentation;antigen processing and presentation of endogenous antigen;antigen processing and presentation of exogenous antigen;antigen processing and presentation of exogenous peptide antigen;antigen …	antigen binding;beta-amyloid binding;binding;cytokine binding;cytokine receptor activity;identical protein binding;macrophage migration inhibitory factor binding;MHC class II protein binding;MHC class II protein binding, via antigen binding groove;MHC class II protein complex binding;MHC protein binding;MHC protein complex binding;molecular transducer activity;protein binding;protein binding invo…	cell part;cell surface;clathrin coated vesicle membrane;clathrin-coated endocytic vesicle membrane;coated vesicle membrane;cytoplasmic part;cytoplasmic vesicle membrane;cytoplasmic vesicle part;endocytic vesicle membrane;endoplasmic reticulum part;endosome;ER to Golgi transport vesicle membrane;external side of plasma membrane;extracellular membrane-bounded organelle;extracellular organelle;extra…	Antigen processing and presentation;ko05152	14-3-3 domain binding motif;Akt kinase substrate motif;Calmodulin-dependent protein kinase II substrate motif;Casein kinase II substrate motif;MAPKAPK1 kinase substrate motif;PKA kinase substrate motif;PKC kinase substrate motif;ZIP kinase substrate motif		1	1.03e-58	204.17	5815200000	5236000000	579240000	8	61.9628
-2.65646	-0.636308	-3.61946	-5.499	-3.32357	-3.61298	-2.47888	-2.53517	-3.45342	-3.14723	-5.791	-3.51685	-3.84649	-5.84391	-3.53203	-3.83959	-2.63436	-3.67003	-3.34463	-5.3216	-5.42167	-4.88551	-1.84087	-2.23405	-2.28712	-4.60083	-2.93722	-3.69273	-5.61032	-3.68612	-2.52906	-5.90823	S	2	1302	___1	anatomical structure homeostasis;biological adhesion;biological regulation;cell adhesion;cell surface receptor linked signaling pathway;cell-cell adhesion;cellular component movement;cellular process;cellular response to chemical stimulus;cellular response to growth factor stimulus;cellular response to organic substance;cellular response to stimulus;cellular response to vascular endothelial growt…	binding;enzyme binding;enzyme inhibitor activity;enzyme regulator activity;identical protein binding;kinase binding;kinase inhibitor activity;kinase regulator activity;protein binding;protein kinase binding;protein kinase C binding;protein kinase C inhibitor activity;protein kinase inhibitor activity;protein kinase regulator activity;protein serine/threonine kinase inhibitor activity;small conjug…	adherens junction;anchoring junction;cell junction;cell part;cell-substrate adherens junction;cell-substrate junction;contractile fiber part;cytoplasm;cytoplasmic part;cytoskeletal part;cytoskeleton;cytosol;extracellular membrane-bounded organelle;extracellular organelle;extracellular region part;extracellular space;extracellular vesicular exosome;focal adhesion;intracellular membrane-bounded org…	Amoebiasis;MAPK signaling pathway;VEGF signaling pathway	14-3-3 domain binding motif;Calmodulin-dependent protein kinase II substrate motif;Calmodulin-dependent protein kinase IV substrate motif;Chk1 kinase substrate motif;G protein-coupled receptor kinase 1 substrate motif;GSK3 kinase substrate motif;MAPKAPK2 kinase substrate motif;PKA kinase substrate motif;PKC kinase substrate motif		0.999548	1.37e-13	133.98	33785000000	10258000000	23527000000	82	33.4463
-2.83711	-1.60003	-4.32994	-5.19587	-3.48066	-4.26259	-2.79863	-2.33633	-3.94564	-3.35507	-6.88314	-4.46944	-4.60153	-5.52177	-3.69897	-4.52996	-2.97416	-4.19313	-3.56551	-5.63463	-6.08319	-2.8333	-2.00375	-2.72735	-2.83739	NaN	-3.64942	-4.4176	-5.30106	-4.34889	-2.85528	-7.02248	S	3	1302	___1	anatomical structure homeostasis;biological adhesion;biological regulation;cell adhesion;cell surface receptor linked signaling pathway;cell-cell adhesion;cellular component movement;cellular process;cellular response to chemical stimulus;cellular response to growth factor stimulus;cellular response to organic substance;cellular response to stimulus;cellular response to vascular endothelial growt…	binding;enzyme binding;enzyme inhibitor activity;enzyme regulator activity;identical protein binding;kinase binding;kinase inhibitor activity;kinase regulator activity;protein binding;protein kinase binding;protein kinase C binding;protein kinase C inhibitor activity;protein kinase inhibitor activity;protein kinase regulator activity;protein serine/threonine kinase inhibitor activity;small conjug…	adherens junction;anchoring junction;cell junction;cell part;cell-substrate adherens junction;cell-substrate junction;contractile fiber part;cytoplasm;cytoplasmic part;cytoskeletal part;cytoskeleton;cytosol;extracellular membrane-bounded organelle;extracellular organelle;extracellular region part;extracellular space;extracellular vesicular exosome;focal adhesion;intracellular membrane-bounded org…	Amoebiasis;MAPK signaling pathway;VEGF signaling pathway	14-3-3 domain binding motif;AMP-activated protein kinase substrate motif;Calmodulin-dependent protein kinase I substrate motif;Calmodulin-dependent protein kinase II substrate motif;Calmodulin-dependent protein kinase IV substrate motif;Chk1 kinase substrate motif;DNA dependent Protein kinase substrate motif;HMGCoA Reductase kinase substrate motif;PKA kinase substrate motif;PKC kinase substrate m…		1	5e-35	147.17	7164100000	1713100000	5451000000	15	77.822
2.11667	2.26184	2.96993	3.03124	1.57036	2.88491	2.37709	1.34241	3.65088	3.50354	2.61895	4.01701	2.89924	2.95909	1.53299	2.81625	2.32051	3.56398	3.42015	2.69787	1.70706	1.38745	2.81873	1.2459	1.13759	3.4441	1.49118	3.16745	3.23283	3.07678	2.53519	2.79313	S	2	1319	___1	anatomical structure morphogenesis;biological regulation;cellular component organization;cellular component organization at cellular level;cellular component organization or biogenesis;cellular component organization or biogenesis at cellular level;cellular macromolecule metabolic process;cellular metabolic process;cellular nitrogen compound metabolic process;cellular process;cellular response to…	binding;chromatin binding;DNA binding;nucleic acid binding	cell part;chromatin;chromosomal part;cytoplasm;intracellular membrane-bounded organelle;intracellular organelle;intracellular organelle part;intracellular part;membrane-bounded organelle;nucleus;organelle;organelle part		14-3-3 domain binding motif;Calmodulin-dependent protein kinase II substrate motif;Casein kinase II substrate motif;Pim1 kinase substrate sequence;PKA kinase substrate motif;PKC epsilon kinase substrate motif;PKC kinase substrate motif		0.999349	1.24e-145	263.19	28311000000	25416000000	2895600000	7	31.8593
-0.776077	-0.0851323	0.461607	-0.172591	-1.05055	-0.645951	-0.771549	-0.541523	0.37815	-0.425273	-0.376753	0.38487	0.450621	-0.183416	-1.11644	-0.686467	-0.819943	0.36915	-0.451948	-0.567351	0.173341	0.205811	NaN	-0.307172	-0.275448	NaN	0.0772675	0.492307	-0.176085	-0.659028	-0.787169	-0.38438	S	2	1319	___1	anatomical structure morphogenesis;biological regulation;cellular component organization;cellular component organization at cellular level;cellular component organization or biogenesis;cellular component organization or biogenesis at cellular level;cellular macromolecule metabolic process;cellular metabolic process;cellular nitrogen compound metabolic process;cellular process;cellular response to…	binding;chromatin binding;DNA binding;nucleic acid binding	cell part;chromatin;chromosomal part;cytoplasm;intracellular membrane-bounded organelle;intracellular organelle;intracellular organelle part;intracellular part;membrane-bounded organelle;nucleus;organelle;organelle part		Casein kinase I substrate motif;PKA kinase substrate motif		1	1.2e-63	167.87	1131600000	681040000	450540000	99	96.5886
-0.315768	0.0960234	-0.222092	NaN	NaN	0.0665501	-1.23222	-0.589941	NaN	-0.113611	-0.131968	NaN	-0.236023	NaN	NaN	0.0649661	-1.30951	NaN	-0.120737	-1.20924	-1.17949	-0.622381	-0.660364	-1.75108	-1.09513	NaN	NaN	-0.226588	NaN	0.0709761	-1.25716	-0.13464	S	3	1332;1333	___1	biosynthetic process;catabolic process;cellular biosynthetic process;cellular catabolic process;cellular component disassembly;cellular component disassembly at cellular level;cellular component organization;cellular component organization at cellular level;cellular component organization or biogenesis;cellular component organization or biogenesis at cellular level;cellular macromolecular complex…	binding;nucleic acid binding;RNA binding;structural constituent of ribosome;structural molecule activity	adherens junction;anchoring junction;cell junction;cell part;cell-substrate adherens junction;cell-substrate junction;cytoplasm;cytoplasmic part;cytosol;cytosolic large ribosomal subunit;extracellular membrane-bounded organelle;extracellular organelle;extracellular region part;extracellular vesicular exosome;focal adhesion;intracellular organelle part;intracellular part;large ribosomal subunit;ma…	Ribosome	b-Adrenergic Receptor kinase substrate motif;Casein kinase II substrate motif;Pyruvate dehydrogenase kinase substrate motif		1	1.01e-63	170.14	2189200000	1168200000	1021000000	105	71.696
-0.852217	-0.531011	-0.280049	-1.00631	-0.85965	-0.882333	-0.722061	-0.840114	-1.49805	-1.00812	-0.835097	-1.27486	-0.297614	-1.06943	-0.91357	-0.937676	-0.767351	-1.59201	-1.07136	-0.936694	-1.15436	-0.98392	-0.666716	-0.9448	-0.775277	NaN	-0.360105	-0.285718	-1.02668	-0.900195	-0.736678	-0.852003	S	3	1337	___1	cellular macromolecule metabolic process;cellular metabolic process;cellular nitrogen compound metabolic process;cellular process;histone mRNA metabolic process;macromolecule metabolic process;macromolecule modification;metabolic process;mRNA metabolic process;ncRNA metabolic process;ncRNA processing;nitrogen compound metabolic process;nucleic acid metabolic process;nucleobase-containing compound…	binding;mRNA binding;nucleic acid binding;nucleotide binding;RNA binding;tRNA binding	cell part;intracellular membrane-bounded organelle;intracellular organelle;intracellular part;macromolecular complex;membrane-bounded organelle;nucleus;organelle;ribonucleoprotein complex	Systemic lupus erythematosus	BARD1 BRCT domain binding motif;Casein kinase II substrate motif;PKA kinase substrate motif;PKC kinase substrate motif		1	4.28e-225	270	57543000000	28446000000	29096000000	366	92.4964
-2.35667	-3.51745	NaN	NaN	-2.89175	-1.15563	-3.42253	-2.15023	NaN	-1.72992	-2.30164	-2.43558	NaN	NaN	-3.07313	-1.22811	-3.63721	NaN	-1.83843	NaN	-2.72564	-1.58696	NaN	NaN	-1.28945	NaN	NaN	NaN	NaN	-1.17902	-3.49182	-2.34824	S	2	1351	___1	anatomical structure development;anatomical structure morphogenesis;androgen receptor signaling pathway;apoptosis;attachment of spindle microtubules to chromosome;biological regulation;biosynthetic process;cell cycle;cell cycle arrest;cell cycle checkpoint;cell cycle process;cell death;cell differentiation;cell division;cell maturation;cell morphogenesis;cell morphogenesis involved in differentia…	androgen receptor binding;binding;core promoter binding;DNA binding;enzyme binding;hormone receptor binding;identical protein binding;kinase binding;nuclear hormone receptor binding;nucleic acid binding;nucleic acid binding transcription factor activity;phosphoprotein binding;protein binding;protein binding transcription factor activity;receptor binding;regulatory region DNA binding;regulatory re…	cell part;chromatin;chromatin remodeling complex;chromosomal part;cytoskeletal part;intracellular membrane-bounded organelle;intracellular non-membrane-bounded organelle;intracellular organelle;intracellular organelle part;intracellular part;macromolecular complex;membrane-bounded organelle;non-membrane-bounded organelle;nuclear body;nuclear part;nucleoplasm;nucleoplasm part;nucleus;organelle;org…	Bladder cancer;Cell cycle;Chronic myeloid leukemia;Glioma;Melanoma;Non-small cell lung cancer;Pancreatic cancer;Pathways in cancer;Prostate cancer;Small cell lung cancer	Cdc2 kinase substrate motif;CDK kinase substrate motif;CDK1,2,4,6 kinase substrate motif;ERK1,2 kinase substrate motif;Growth associated histone HI kinase substrate motif;GSK-3, ERK1, ERK2, CDK5 substrate motif;WW domain binding motif		0.999976	4.72e-10	125.39	921160000	209360000	711800000	788	46.1427
-2.16394	-2.36855	NaN	NaN	NaN	-0.880601	-2.41758	NaN	NaN	-1.98968	-1.72301	-2.83394	NaN	NaN	NaN	-0.935835	-2.56922	NaN	-2.11448	NaN	-2.63829	-0.756724	-1.98572	NaN	-2.12723	NaN	NaN	NaN	NaN	-0.898428	-2.46652	-1.75789	S	2	1351	___1	anatomical structure development;anatomical structure morphogenesis;androgen receptor signaling pathway;apoptosis;attachment of spindle microtubules to chromosome;biological regulation;biosynthetic process;cell cycle;cell cycle arrest;cell cycle checkpoint;cell cycle process;cell death;cell differentiation;cell division;cell maturation;cell morphogenesis;cell morphogenesis involved in differentia…	androgen receptor binding;binding;core promoter binding;DNA binding;enzyme binding;hormone receptor binding;identical protein binding;kinase binding;nuclear hormone receptor binding;nucleic acid binding;nucleic acid binding transcription factor activity;phosphoprotein binding;protein binding;protein binding transcription factor activity;receptor binding;regulatory region DNA binding;regulatory re…	cell part;chromatin;chromatin remodeling complex;chromosomal part;cytoskeletal part;intracellular membrane-bounded organelle;intracellular non-membrane-bounded organelle;intracellular organelle;intracellular organelle part;intracellular part;macromolecular complex;membrane-bounded organelle;non-membrane-bounded organelle;nuclear body;nuclear part;nucleoplasm;nucleoplasm part;nucleus;organelle;org…	Bladder cancer;Cell cycle;Chronic myeloid leukemia;Glioma;Melanoma;Non-small cell lung cancer;Pancreatic cancer;Pathways in cancer;Prostate cancer;Small cell lung cancer	Casein kinase II substrate motif;ERK1,2 kinase substrate motif;G protein-coupled receptor kinase 1 substrate motif;Growth associated histone HI kinase substrate motif;GSK-3, ERK1, ERK2, CDK5 substrate motif;PKA kinase substrate motif;PKC kinase substrate motif;WW domain binding motif		1	1.36e-06	112.62	182050000	61405000	120640000	249	87.3276
-0.535574	0.0538162	-0.370148	-0.744163	-0.79029	-1.79197	NaN	-0.300873	NaN	-1.48282	NaN	-0.257378	-0.393365	-0.790839	-0.839859	-1.90437	NaN	NaN	-1.57582	-0.3135	0.340938	0.225951	0.179639	0.149077	0.279373	NaN	NaN	-0.377641	-0.759228	-1.82825	NaN	NaN	S	3	1365	___1	aging;ATP-dependent chromatin remodeling;biological regulation;cell aging;cell cycle process;cellular component assembly;cellular component assembly at cellular level;cellular component organization;cellular component organization at cellular level;cellular component organization or biogenesis;cellular component organization or biogenesis at cellular level;cellular macromolecular complex assembly…	binding;enzyme binding;enzyme inhibitor activity;enzyme regulator activity;histone binding;identical protein binding;kinase binding;kinase inhibitor activity;kinase regulator activity;NF-kappaB binding;nucleic acid binding;protein binding;protein binding transcription factor activity;protein dimerization activity;protein heterodimerization activity;protein homodimerization activity;protein kinase…	adherens junction;anchoring junction;cell junction;cell part;cell-substrate adherens junction;cell-substrate junction;centrosome;cytoplasm;cytoplasmic part;cytoskeletal part;cytosol;focal adhesion;intracellular membrane-bounded organelle;intracellular non-membrane-bounded organelle;intracellular organelle;intracellular organelle part;intracellular part;macromolecular complex;membrane;membrane-bou…		b-Adrenergic Receptor kinase substrate motif;BARD1 BRCT domain binding motif;Casein kinase I substrate motif;Casein kinase II substrate motif;G protein-coupled receptor kinase 1 substrate motif	+	1	1.82e-170	197.66	2780700000	1544300000	1236500000	125	83.2148
0.813665	-1.45041	NaN	NaN	0.514495	-3.49971	-0.0826114	0.763834	NaN	-2.92557	-2.94378	0.0576437	NaN	NaN	0.50225	-3.71922	-0.087793	NaN	-3.10907	0.731093	-0.382633	-1.00527	-0.0738092	0.627676	-1.05563	NaN	1.31417	NaN	NaN	-3.57055	-0.0842838	-3.00337	S	2	1365	___1	aging;ATP-dependent chromatin remodeling;biological regulation;cell aging;cell cycle process;cellular component assembly;cellular component assembly at cellular level;cellular component organization;cellular component organization at cellular level;cellular component organization or biogenesis;cellular component organization or biogenesis at cellular level;cellular macromolecular complex assembly…	binding;enzyme binding;enzyme inhibitor activity;enzyme regulator activity;histone binding;identical protein binding;kinase binding;kinase inhibitor activity;kinase regulator activity;NF-kappaB binding;nucleic acid binding;protein binding;protein binding transcription factor activity;protein dimerization activity;protein heterodimerization activity;protein homodimerization activity;protein kinase…	adherens junction;anchoring junction;cell junction;cell part;cell-substrate adherens junction;cell-substrate junction;centrosome;cytoplasm;cytoplasmic part;cytoskeletal part;cytosol;focal adhesion;intracellular membrane-bounded organelle;intracellular non-membrane-bounded organelle;intracellular organelle;intracellular organelle part;intracellular part;macromolecular complex;membrane;membrane-bou…		Casein kinase II substrate motif;Phosphorylase kinase substrate motif;PKA kinase substrate motif;PKC kinase substrate motif		0.999758	0.000635731	113.66	440390000	244860000	195530000	137	36.1519
0.543406	-1.83553	NaN	-3.02328	-0.0914634	NaN	0.498266	-0.252967	NaN	-2.41899	-2.56529	-1.503	NaN	-3.21291	-0.0972002	NaN	0.486407	NaN	-2.57071	0.0974267	-0.11975	NaN	-0.854036	0.799933	NaN	NaN	NaN	NaN	-3.08449	NaN	0.531404	-2.61722	S	2	1365	___1	aging;ATP-dependent chromatin remodeling;biological regulation;cell aging;cell cycle process;cellular component assembly;cellular component assembly at cellular level;cellular component organization;cellular component organization at cellular level;cellular component organization or biogenesis;cellular component organization or biogenesis at cellular level;cellular macromolecular complex assembly…	binding;enzyme binding;enzyme inhibitor activity;enzyme regulator activity;histone binding;identical protein binding;kinase binding;kinase inhibitor activity;kinase regulator activity;NF-kappaB binding;nucleic acid binding;protein binding;protein binding transcription factor activity;protein dimerization activity;protein heterodimerization activity;protein homodimerization activity;protein kinase…	adherens junction;anchoring junction;cell junction;cell part;cell-substrate adherens junction;cell-substrate junction;centrosome;cytoplasm;cytoplasmic part;cytoskeletal part;cytosol;focal adhesion;intracellular membrane-bounded organelle;intracellular non-membrane-bounded organelle;intracellular organelle;intracellular organelle part;intracellular part;macromolecular complex;membrane;membrane-bou…		G protein-coupled receptor kinase 1 substrate motif;GSK3 kinase substrate motif;PKA kinase substrate motif;PKC kinase substrate motif		0.99959	0.00136288	102.52	235850000	119050000	116800000	139	33.8666
-0.00966104	-1.25172	-0.0887513	1.75072	0.557212	1.011	0.756854	0.315486	NaN	3.1576	1.48276	NaN	-0.094318	1.70905	0.54395	0.986933	0.73884	NaN	3.08245	0.761187	-0.0734631	-1.44109	-2.34081	-0.274867	0.81392	NaN	NaN	-0.090548	1.86716	1.07823	0.80719	1.58137	S	2	1387	___1	anatomical structure formation involved in morphogenesis;angiogenesis;biological regulation;body fluid secretion;cellular component assembly;cellular component assembly at cellular level;cellular component organization;cellular component organization at cellular level;cellular component organization or biogenesis;cellular component organization or biogenesis at cellular level;cellular membrane or…	binding;calcium ion binding;calcium-dependent phospholipid binding;calcium-dependent protein binding;cation binding;enzyme inhibitor activity;enzyme regulator activity;ion binding;lipase inhibitor activity;lipid binding;metal ion binding;phosphatidylinositol binding;phosphatidylinositol-4,5-bisphosphate binding;phospholipase A2 inhibitor activity;phospholipase inhibitor activity;phospholipid bind…	basement membrane;basolateral plasma membrane;cell cortex;cell part;cell projection;cell surface;cytoplasmic membrane-bounded vesicle;cytoplasmic part;cytoplasmic vesicle;early endosome;endosomal part;endosome;endosome membrane;extracellular matrix part;extracellular membrane-bounded organelle;extracellular organelle;extracellular region part;extracellular space;extracellular vesicular exosome;ex…		MAPKAPK2 kinase substrate motif;PKA kinase substrate motif;PKC kinase substrate motif		0.999976	2.55e-44	144.63	1540600000	1228700000	311960000	26	46.2788
-0.362276	-0.195572	-0.630029	1.10291	-0.515894	-0.594627	0.176356	-0.621916	-0.0282365	-0.291818	-0.612396	2.42994	-0.669546	1.07666	-0.548252	-0.631924	0.172159	-0.0300075	-0.310122	-0.640772	-0.423347	-0.708356	NaN	-0.720045	-0.731607	NaN	0.624189	-0.642783	1.17626	-0.606665	0.188085	-0.624793	S	3	1402	___1	apoptosis;axon guidance;biological regulation;cardiac muscle cell apoptosis;cell cycle;cell cycle process;cell death;cell migration;cell motility;cell surface receptor linked signaling pathway;cellular component assembly;cellular component assembly at cellular level;cellular component movement;cellular component organization;cellular component organization at cellular level;cellular component org…	adenyl deoxyribonucleotide binding;adenyl nucleotide binding;adenyl ribonucleotide binding;antigen binding;ATP binding;ATPase activity;binding;catalytic activity;CTP binding;dATP binding;deoxyribonucleotide binding;enzyme binding;enzyme regulator activity;GTP binding;GTPase binding;guanyl nucleotide binding;guanyl ribonucleotide binding;hydrolase activity;hydrolase activity, acting on acid anhydr…	apical plasma membrane;basolateral plasma membrane;brush border membrane;cell body;cell part;cell projection;cell projection membrane;cell projection part;cell surface;cytoplasm;cytoplasmic membrane-bounded vesicle;cytoplasmic membrane-bounded vesicle lumen;cytoplasmic part;cytoplasmic vesicle;cytoplasmic vesicle part;cytosol;endocytic vesicle lumen;extracellular matrix;extracellular membrane-bou…	Antigen processing and presentation;NOD-like receptor signaling pathway;Pathways in cancer;Plant-pathogen interaction;Progesterone-mediated oocyte maturation;Prostate cancer;Protein processing in endoplasmic reticulum	BARD1 BRCT domain binding motif;Casein kinase II substrate motif;G protein-coupled receptor kinase 1 substrate motif;PKA kinase substrate motif;PKC kinase substrate motif		1	2.41e-94	229.02	3148200000	1776100000	1372100000	231	204.31
-0.402486	-0.483673	-1.04791	NaN	-0.478737	-0.523245	0.12648	-0.265911	-1.27942	-0.560078	-0.543303	-0.876933	-1.11364	NaN	-0.508765	-0.556064	0.12347	-1.35967	-0.595208	-0.667432	-0.550641	-0.896289	-1.34994	-0.690899	-0.741648	NaN	0.28751	-1.06913	NaN	-0.533837	0.134892	-0.554301	S	3	1402	___1	apoptosis;axon guidance;biological regulation;cardiac muscle cell apoptosis;cell cycle;cell cycle process;cell death;cell migration;cell motility;cell surface receptor linked signaling pathway;cellular component assembly;cellular component assembly at cellular level;cellular component movement;cellular component organization;cellular component organization at cellular level;cellular component org…	adenyl deoxyribonucleotide binding;adenyl nucleotide binding;adenyl ribonucleotide binding;antigen binding;ATP binding;ATPase activity;binding;catalytic activity;CTP binding;dATP binding;deoxyribonucleotide binding;enzyme binding;enzyme regulator activity;GTP binding;GTPase binding;guanyl nucleotide binding;guanyl ribonucleotide binding;hydrolase activity;hydrolase activity, acting on acid anhydr…	apical plasma membrane;basolateral plasma membrane;brush border membrane;cell body;cell part;cell projection;cell projection membrane;cell projection part;cell surface;cytoplasm;cytoplasmic membrane-bounded vesicle;cytoplasmic membrane-bounded vesicle lumen;cytoplasmic part;cytoplasmic vesicle;cytoplasmic vesicle part;cytosol;endocytic vesicle lumen;extracellular matrix;extracellular membrane-bou…	Antigen processing and presentation;NOD-like receptor signaling pathway;Pathways in cancer;Plant-pathogen interaction;Progesterone-mediated oocyte maturation;Prostate cancer;Protein processing in endoplasmic reticulum	BARD1 BRCT domain binding motif;Casein kinase I substrate motif;Casein kinase II substrate motif		1	2.6e-248	298.97	37058000000	23338000000	13720000000	263	134.492
0.459711	-2.0899	-1.04967	-3.32897	0.24259	-0.105879	-1.48301	0.885613	-2.35945	-0.0188695	-1.44352	0.422504	-1.11551	-3.53777	0.236816	-0.11252	-1.57603	-2.50745	-0.020053	0.888975	-2.381	-1.95175	1.08435	-0.335652	-0.367178	NaN	-1.05127	-1.07092	-3.39636	-0.108023	-1.51303	-1.47274	S	2	1404;1405;1406	___1	3'-UTR-mediated mRNA stabilization;ATP-dependent chromatin remodeling;biological regulation;cell differentiation;cellular component organization;cellular component organization at cellular level;cellular component organization or biogenesis;cellular component organization or biogenesis at cellular level;cellular developmental process;cellular macromolecule metabolic process;cellular metabolic pro…	binding;chromatin binding;chromatin DNA binding;core promoter proximal region DNA binding;core promoter proximal region sequence-specific DNA binding;DNA binding;enhancer binding;enhancer sequence-specific DNA binding;identical protein binding;mRNA 3'-UTR binding;mRNA binding;nucleic acid binding;nucleosomal DNA binding;nucleosome binding;nucleotide binding;poly(U) RNA binding;poly-pyrimidine tra…	catalytic step 2 spliceosome;cell part;chromatin;chromosomal part;cytoplasmic part;cytosol;extracellular membrane-bounded organelle;extracellular organelle;extracellular region part;extracellular vesicular exosome;intracellular membrane-bounded organelle;intracellular organelle;intracellular organelle part;intracellular part;macromolecular complex;membrane;membrane-bounded organelle;membrane-boun…	Spliceosome	14-3-3 domain binding motif;Calmodulin-dependent protein kinase II alpha substrate motif;Calmodulin-dependent protein kinase II substrate motif;Calmodulin-dependent protein kinase IV substrate motif;PKA kinase substrate motif;PKC kinase substrate motif		0.99988	0.00194157	91.069	1237100000	717510000	519610000	125	41.4787
0.105778	-0.289049	1.15789	0.58722	-0.0869976	0.192633	0.0414696	NaN	0.972149	0.416968	0.392792	0.150049	1.13033	0.573244	-0.0924544	0.188048	0.0404826	0.94901	0.407043	0.0743079	0.19074	0.396645	NaN	0.186631	0.0969796	NaN	0.11151	1.2349	0.626275	0.205444	0.0442276	0.418915	S	2	1404;1405;1406	___1	3'-UTR-mediated mRNA stabilization;ATP-dependent chromatin remodeling;biological regulation;cell differentiation;cellular component organization;cellular component organization at cellular level;cellular component organization or biogenesis;cellular component organization or biogenesis at cellular level;cellular developmental process;cellular macromolecule metabolic process;cellular metabolic pro…	binding;chromatin binding;chromatin DNA binding;core promoter proximal region DNA binding;core promoter proximal region sequence-specific DNA binding;DNA binding;enhancer binding;enhancer sequence-specific DNA binding;identical protein binding;mRNA 3'-UTR binding;mRNA binding;nucleic acid binding;nucleosomal DNA binding;nucleosome binding;nucleotide binding;poly(U) RNA binding;poly-pyrimidine tra…	catalytic step 2 spliceosome;cell part;chromatin;chromosomal part;cytoplasmic part;cytosol;extracellular membrane-bounded organelle;extracellular organelle;extracellular region part;extracellular vesicular exosome;intracellular membrane-bounded organelle;intracellular organelle;intracellular organelle part;intracellular part;macromolecular complex;membrane;membrane-bounded organelle;membrane-boun…	Spliceosome	BARD1 BRCT domain binding motif;Casein kinase II substrate motif;G protein-coupled receptor kinase 1 substrate motif;PKA kinase substrate motif		1	1.31e-276	336.16	4567100000	2960500000	1606600000	220	171.725
-0.145548	-0.204546	-0.70612	0.0765503	-0.513614	NaN	0.135904	-0.546497	NaN	0.822682	-0.0641548	0.580833	-0.75041	0.0747283	-0.54583	NaN	0.132669	NaN	0.803101	-0.485992	0.618865	-0.456285	-0.893651	-0.0686027	-0.379521	NaN	NaN	-0.720414	0.0816414	NaN	0.144943	-0.0654535	S	2	1410;1411	___1	activation of immune response;activation of innate immune response;amine transport;anatomical structure development;antigen receptor-mediated signaling pathway;axon guidance;B cell homeostasis;B cell receptor signaling pathway;biological regulation;blood coagulation;cell activation;cell communication;cell development;cell differentiation;cell migration;cell motility;cell surface receptor linked s…	adenyl nucleotide binding;adenyl ribonucleotide binding;ATP binding;binding;catalytic activity;enzyme binding;glycolipid binding;glycosphingolipid binding;ion channel binding;kinase activity;lipid binding;molecular transducer activity;non-membrane spanning protein tyrosine kinase activity;nucleotide binding;phosphotransferase activity, alcohol group as acceptor;protein binding;protein kinase acti…	alpha2-beta1 integrin complex;cell part;cytoplasm;cytoplasmic part;cytoskeletal part;cytosol;extracellular membrane-bounded organelle;extracellular organelle;extracellular region part;extracellular vesicular exosome;extrinsic to internal side of plasma membrane;extrinsic to membrane;extrinsic to plasma membrane;Golgi apparatus;integrin complex;intracellular membrane-bounded organelle;intracellula…	B cell receptor signaling pathway;Chemokine signaling pathway;Epithelial cell signaling in Helicobacter pylori infection;Fc epsilon RI signaling pathway;Fc gamma R-mediated phagocytosis;Long-term depression	b-Adrenergic Receptor kinase substrate motif;Casein kinase II substrate motif;PKA kinase substrate motif;PKC kinase substrate motif;Pyruvate dehydrogenase kinase substrate motif		1	1.33e-37	161.35	1458800000	832110000	626710000	11	49.5369
-0.179857	-0.259772	-0.56362	0.0634638	0.00679817	-0.780323	-0.163262	-0.640401	-0.135671	0.319506	-0.236948	-0.00722184	-0.598972	0.0619533	0.00663637	-0.829267	-0.173502	-0.14418	0.311901	-0.489329	-0.421303	-0.452427	-0.909581	-0.979363	-1.05638	NaN	-1.35767	-0.57503	0.0676846	-0.79612	-0.166567	-0.241745	S	2	1410;1411	___1	activation of immune response;activation of innate immune response;amine transport;anatomical structure development;antigen receptor-mediated signaling pathway;axon guidance;B cell homeostasis;B cell receptor signaling pathway;biological regulation;blood coagulation;cell activation;cell communication;cell development;cell differentiation;cell migration;cell motility;cell surface receptor linked s…	adenyl nucleotide binding;adenyl ribonucleotide binding;ATP binding;binding;catalytic activity;enzyme binding;glycolipid binding;glycosphingolipid binding;ion channel binding;kinase activity;lipid binding;molecular transducer activity;non-membrane spanning protein tyrosine kinase activity;nucleotide binding;phosphotransferase activity, alcohol group as acceptor;protein binding;protein kinase acti…	alpha2-beta1 integrin complex;cell part;cytoplasm;cytoplasmic part;cytoskeletal part;cytosol;extracellular membrane-bounded organelle;extracellular organelle;extracellular region part;extracellular vesicular exosome;extrinsic to internal side of plasma membrane;extrinsic to membrane;extrinsic to plasma membrane;Golgi apparatus;integrin complex;intracellular membrane-bounded organelle;intracellula…	B cell receptor signaling pathway;Chemokine signaling pathway;Epithelial cell signaling in Helicobacter pylori infection;Fc epsilon RI signaling pathway;Fc gamma R-mediated phagocytosis;Long-term depression	Casein kinase I substrate motif;PKA kinase substrate motif	+	1	1.75e-79	210.98	7464700000	4034400000	3430300000	13	49.5369
-1.48645	-1.42904	-0.562838	NaN	-1.09933	-1.28329	-0.897488	NaN	0.503007	-0.710398	-1.29284	2.05666	-0.598141	NaN	-1.16828	-1.36378	-0.953782	0.491035	-0.754956	NaN	-0.958058	-0.781365	NaN	-4.46091	-1.71025	NaN	NaN	-0.574232	NaN	-1.30927	-0.915657	-1.31901	S	2	1428	___1	anatomical structure development;axon guidance;biological regulation;cellular macromolecule metabolic process;cellular metabolic process;cellular process;cellular protein metabolic process;cellular response to chemical stimulus;cellular response to cytokine stimulus;cellular response to heat;cellular response to interleukin-4;cellular response to organic substance;cellular response to stimulus;ce…	adenyl nucleotide binding;adenyl ribonucleotide binding;antigen binding;ATP binding;binding;double-stranded RNA binding;enzyme binding;enzyme regulator activity;kinase binding;MHC class II protein complex binding;MHC protein complex binding;nitric-oxide synthase regulator activity;nucleic acid binding;nucleotide binding;protein binding;protein domain specific binding;purine nucleotide binding;pur…	cell part;cytoplasm;cytoplasmic membrane-bounded vesicle;cytoplasmic part;cytoplasmic vesicle;cytosol;extracellular membrane-bounded organelle;extracellular organelle;extracellular region part;extracellular vesicular exosome;intracellular membrane-bounded organelle;intracellular organelle;intracellular organelle part;intracellular part;melanosome;membrane;membrane-bounded organelle;membrane-bound…	Antigen processing and presentation;NOD-like receptor signaling pathway;Pathways in cancer;Plant-pathogen interaction;Progesterone-mediated oocyte maturation;Prostate cancer;Protein processing in endoplasmic reticulum	BARD1 BRCT domain binding motif;Casein kinase II substrate motif;G protein-coupled receptor kinase 1 substrate motif;PKA kinase substrate motif;PKC kinase substrate motif		1	9.03e-21	133.86	758870000	362460000	396410000	226	41.695
-0.927825	-1.51149	-1.77582	-2.23944	-0.869232	-1.66724	-1.15036	-1.56142	2.73932	-1.41737	-1.79672	-1.74121	-1.88721	-2.3799	-0.923753	-1.77182	-1.22251	2.67412	-1.50627	-1.84213	-1.5745	-1.65817	-1.94179	-1.67605	-1.66516	-3.31992	-1.60962	-1.81177	-2.28477	-1.70099	-1.17364	-1.8331	S	3	1428;4243	___1	anatomical structure development;axon guidance;biological regulation;cellular macromolecule metabolic process;cellular metabolic process;cellular process;cellular protein metabolic process;cellular response to chemical stimulus;cellular response to cytokine stimulus;cellular response to heat;cellular response to interleukin-4;cellular response to organic substance;cellular response to stimulus;ce…	adenyl nucleotide binding;adenyl ribonucleotide binding;antigen binding;ATP binding;binding;double-stranded RNA binding;enzyme binding;enzyme regulator activity;kinase binding;MHC class II protein complex binding;MHC protein complex binding;nitric-oxide synthase regulator activity;nucleic acid binding;nucleotide binding;protein binding;protein domain specific binding;purine nucleotide binding;pur…	cell part;cytoplasm;cytoplasmic membrane-bounded vesicle;cytoplasmic part;cytoplasmic vesicle;cytosol;extracellular membrane-bounded organelle;extracellular organelle;extracellular region part;extracellular vesicular exosome;intracellular membrane-bounded organelle;intracellular organelle;intracellular organelle part;intracellular part;melanosome;membrane;membrane-bounded organelle;membrane-bound…	Antigen processing and presentation;NOD-like receptor signaling pathway;Pathways in cancer;Plant-pathogen interaction;Progesterone-mediated oocyte maturation;Prostate cancer;Protein processing in endoplasmic reticulum	BARD1 BRCT domain binding motif;Casein kinase I substrate motif;Casein kinase II substrate motif		1	1.53e-150	250.27	261340000000	102840000000	158500000000	255	96.7085
-0.166823	2.75395	3.97997	3.06527	0.355119	1.38854	1.04754	2.56046	1.55022	1.12279	2.70138	1.96955	3.88524	2.99232	0.346667	1.35549	1.0226	1.51333	1.09606	1.28262	2.17146	2.01926	3.12722	1.93498	2.90076	NaN	1.23706	4.24467	3.26914	1.48089	1.1172	2.88104	S	2	1438;1439	___1	acetyl-CoA biosynthetic process;acetyl-CoA biosynthetic process from pyruvate;acetyl-CoA catabolic process;acetyl-CoA metabolic process;alcohol catabolic process;alcohol metabolic process;biological regulation;biosynthetic process;carbohydrate catabolic process;carbohydrate metabolic process;carboxylic acid metabolic process;catabolic process;cellular biosynthetic process;cellular carbohydrate ca…	catalytic activity;oxidoreductase activity;oxidoreductase activity, acting on the aldehyde or oxo group of donors;oxidoreductase activity, acting on the aldehyde or oxo group of donors, disulfide as acceptor;pyruvate dehydrogenase (acetyl-transferring) activity;pyruvate dehydrogenase activity	cell part;cytoplasmic part;intracellular membrane-bounded organelle;intracellular organelle;intracellular organelle lumen;intracellular organelle part;intracellular part;macromolecular complex;membrane-bounded organelle;membrane-enclosed lumen;mitochondrial matrix;mitochondrial part;mitochondrion;nucleus;organelle;organelle lumen;organelle part;protein complex;pyruvate dehydrogenase complex	Butanoate metabolism;Citrate cycle (TCA cycle);Glycolysis / Gluconeogenesis;Pyruvate metabolism;Valine, leucine and isoleucine biosynthesis	Casein kinase II substrate motif;G protein-coupled receptor kinase 1 substrate motif		0.999998	4.88e-09	130.56	5774000000	5135200000	638720000	232	56.5472
-0.294591	0.896082	1.16975	0.370598	-0.594335	-0.169196	-0.152609	0.490359	0.450224	-0.0312103	1.08312	0.854567	1.1419	0.361777	-0.631614	-0.179808	-0.162182	0.439508	-0.0331679	0.258833	0.653668	0.88098	0.670226	0.0963921	0.762702	NaN	0.530409	1.24754	0.395245	-0.172621	-0.155699	1.15515	S	3	1438;1439	___1	acetyl-CoA biosynthetic process;acetyl-CoA biosynthetic process from pyruvate;acetyl-CoA catabolic process;acetyl-CoA metabolic process;alcohol catabolic process;alcohol metabolic process;biological regulation;biosynthetic process;carbohydrate catabolic process;carbohydrate metabolic process;carboxylic acid metabolic process;catabolic process;cellular biosynthetic process;cellular carbohydrate ca…	catalytic activity;oxidoreductase activity;oxidoreductase activity, acting on the aldehyde or oxo group of donors;oxidoreductase activity, acting on the aldehyde or oxo group of donors, disulfide as acceptor;pyruvate dehydrogenase (acetyl-transferring) activity;pyruvate dehydrogenase activity	cell part;cytoplasmic part;intracellular membrane-bounded organelle;intracellular organelle;intracellular organelle lumen;intracellular organelle part;intracellular part;macromolecular complex;membrane-bounded organelle;membrane-enclosed lumen;mitochondrial matrix;mitochondrial part;mitochondrion;nucleus;organelle;organelle lumen;organelle part;protein complex;pyruvate dehydrogenase complex	Butanoate metabolism;Citrate cycle (TCA cycle);Glycolysis / Gluconeogenesis;Pyruvate metabolism;Valine, leucine and isoleucine biosynthesis	Casein kinase II substrate motif;G protein-coupled receptor kinase 1 substrate motif;Pyruvate dehydrogenase kinase substrate motif		0.999196	2.68e-16	125.98	21037000000	16229000000	4808100000	293	30.9614
1.52038	0.493167	0.745767	2.97477	2.2161	0.623244	1.61664	1.04437	3.29	2.48894	1.5245	2.71217	0.728017	2.90396	2.16336	0.60841	1.57816	3.21169	2.4297	1.32961	1.58211	0.474206	-0.693067	0.95392	1.32251	1.49815	0.257361	0.795366	3.17261	0.664694	1.72416	1.62589	S	2	1443	___1	activation of immune response;anatomical structure development;antigen receptor-mediated signaling pathway;axon guidance;B cell activation;B cell proliferation;B cell receptor signaling pathway;biological regulation;biosynthetic process;bone marrow development;calcium ion homeostasis;calcium ion transport;calcium ion transport into cytosol;cation homeostasis;cation transport;cell activation;cell …	binding;catalytic activity;enzyme binding;hydrolase activity;hydrolase activity, acting on ester bonds;kinase binding;molecular transducer activity;phosphatase activity;phosphoprotein phosphatase activity;phosphoric ester hydrolase activity;protein binding;protein kinase binding;protein tyrosine phosphatase activity;receptor activity;signal transducer activity;signaling receptor activity;transmem…	adherens junction;anchoring junction;cell junction;cell part;cell surface;cell-substrate adherens junction;cell-substrate junction;external side of plasma membrane;extracellular membrane-bounded organelle;extracellular organelle;extracellular region part;extracellular vesicular exosome;focal adhesion;integral to membrane;integral to plasma membrane;intrinsic to membrane;intrinsic to plasma membra…	Cell adhesion molecules (CAMs);Fc gamma R-mediated phagocytosis;Primary immunodeficiency;T cell receptor signaling pathway	G protein-coupled receptor kinase 1 substrate motif;PKA kinase substrate motif;PKC kinase substrate motif		1	2.3e-37	156.49	31050000000	25823000000	5227100000	812	76.2128
0.00126219	0.0298988	0.777615	0.0173084	-0.12638	0.367122	-0.173224	0.162032	0.459692	0.416735	0.319425	-0.209899	0.759107	0.0168965	-0.134307	0.358384	-0.184089	0.448751	0.406816	0.372657	-0.0657035	0.301569	0.361053	0.252273	0.347272	0.513885	-0.102789	0.829332	0.0184596	0.391538	-0.17673	0.340669	S	3	1447	___1	biological regulation;cellular macromolecule metabolic process;cellular metabolic process;cellular nitrogen compound metabolic process;cellular process;gene expression;macromolecule metabolic process;metabolic process;mRNA metabolic process;mRNA processing;nitrogen compound metabolic process;nuclear mRNA splicing, via spliceosome;nucleic acid metabolic process;nucleobase-containing compound metab…	binding;nucleic acid binding;nucleotide binding;RNA binding	cell part;intracellular membrane-bounded organelle;intracellular organelle;intracellular organelle part;intracellular part;macromolecular complex;membrane-bounded organelle;nuclear body;nuclear part;nuclear speck;nucleoplasm;nucleoplasm part;nucleus;organelle;organelle part;ribonucleoprotein complex;small nuclear ribonucleoprotein complex;spliceosomal complex;U1 snRNP	Spliceosome	DNA dependent Protein kinase substrate motif;ERK1,2 kinase substrate motif;GSK-3, ERK1, ERK2, CDK5 substrate motif;WW domain binding motif		1	9.91e-23	118.21	13491000000	8951900000	4538900000	226	81.3598
-0.372303	-0.506422	-0.471033	-0.811897	-0.618852	-0.378092	NaN	0.492148	NaN	-0.788504	-0.999887	NaN	-0.500577	-0.862822	-0.657668	-0.401807	NaN	NaN	-0.837962	0.138003	-0.69517	-0.251602	-0.137972	-0.545663	-0.11466	NaN	NaN	-0.480568	-0.828333	-0.385746	NaN	-1.02013	S	2	1452;1453	___1	anatomical structure morphogenesis;biological regulation;biosynthetic process;cellular biosynthetic process;cellular macromolecule biosynthetic process;cellular macromolecule metabolic process;cellular metabolic process;cellular nitrogen compound metabolic process;cellular process;developmental process;DNA metabolic process;DNA replication;macromolecule biosynthetic process;macromolecule metaboli…	binding;core promoter proximal region DNA binding;core promoter proximal region sequence-specific DNA binding;DNA binding;double-stranded DNA binding;nucleic acid binding;nucleic acid binding transcription factor activity;regulatory region DNA binding;regulatory region nucleic acid binding;RNA polymerase II core promoter proximal region sequence-specific DNA binding;RNA polymerase II core promote…	cell part;intracellular membrane-bounded organelle;intracellular non-membrane-bounded organelle;intracellular organelle;intracellular organelle part;intracellular part;membrane-bounded organelle;non-membrane-bounded organelle;nuclear part;nucleolus;nucleoplasm;nucleus;organelle;organelle part		Cdc2 kinase substrate motif;CDK kinase substrate motif;CDK1,2,4,6 kinase substrate motif;ERK1,2 kinase substrate motif;Growth associated histone HI kinase substrate motif;GSK-3, ERK1, ERK2, CDK5 substrate motif;MDC1 BRCT domain binding motif;Plk1 PBD domain binding motif;WW domain binding motif		0.958069	5.92e-108	211.43	1070900000	596900000	473970000	314	13.5886
2.8235	2.41594	NaN	1.72677	2.87391	6.18353	2.71376	3.14408	4.76095	5.00748	NaN	NaN	NaN	1.68567	2.8055	6.03636	2.64917	4.64763	4.8883	3.79386	0.93432	-0.392055	3.37735	1.51929	3.22182	6.11121	2.01697	NaN	1.84161	6.59478	2.89425	NaN	S	2	1454	___1	actin filament-based movement;actin filament-based process;actin-mediated cell contraction;actin-myosin filament sliding;anatomical structure development;apoptosis;astrocyte development;astrocyte differentiation;Bergmann glial cell differentiation;biological regulation;cell death;cell development;cell differentiation;cellular component disassembly;cellular component disassembly at cellular level;…	binding;double-stranded RNA binding;glycoprotein binding;identical protein binding;nucleic acid binding;protein binding;protein C-terminus binding;RNA binding;scaffold protein binding;structural constituent of cytoskeleton;structural constituent of eye lens;structural molecule activity	adherens junction;anchoring junction;cell junction;cell leading edge;cell part;cell projection;cell-substrate adherens junction;cell-substrate junction;cytoplasm;cytoplasmic part;cytoskeletal part;cytoskeleton;cytosol;extracellular membrane-bounded organelle;extracellular organelle;extracellular region part;extracellular vesicular exosome;focal adhesion;intermediate filament;intermediate filament…		14-3-3 domain binding motif;Calmodulin-dependent protein kinase II substrate motif;PKA kinase substrate motif;PKC kinase substrate motif		1	9.87e-06	113.07	3671800000	3506200000	165610000	72	46.1586
3.31966	NaN	6.22718	5.18057	3.72588	4.48386	NaN	3.97011	NaN	4.9131	5.057	3.06308	6.07897	5.05727	3.6372	4.37714	NaN	NaN	4.79616	4.19445	3.06657	2.56068	1.70348	1.53713	NaN	6.11121	4.19799	6.64133	5.52512	4.78207	NaN	5.39333	S	2	1454	___1	actin filament-based movement;actin filament-based process;actin-mediated cell contraction;actin-myosin filament sliding;anatomical structure development;apoptosis;astrocyte development;astrocyte differentiation;Bergmann glial cell differentiation;biological regulation;cell death;cell development;cell differentiation;cellular component disassembly;cellular component disassembly at cellular level;…	binding;double-stranded RNA binding;glycoprotein binding;identical protein binding;nucleic acid binding;protein binding;protein C-terminus binding;RNA binding;scaffold protein binding;structural constituent of cytoskeleton;structural constituent of eye lens;structural molecule activity	adherens junction;anchoring junction;cell junction;cell leading edge;cell part;cell projection;cell-substrate adherens junction;cell-substrate junction;cytoplasm;cytoplasmic part;cytoskeletal part;cytoskeleton;cytosol;extracellular membrane-bounded organelle;extracellular organelle;extracellular region part;extracellular vesicular exosome;focal adhesion;intermediate filament;intermediate filament…		AMP-activated protein kinase substrate motif;MDC1 BRCT domain binding motif;PKA kinase substrate motif;PKC kinase substrate motif;Plk1 PBD domain binding motif	+	1	1.77e-05	108.72	5825700000	5604700000	220960000	73	46.1586
2.74241	0.886665	1.16596	2.97066	3.17649	5.18801	3.30308	2.69548	4.01824	4.38001	4.07876	NaN	1.13821	2.89995	3.10089	5.06453	3.22446	3.9226	4.27576	3.54677	2.11664	0.490875	1.25774	1.97897	2.71999	NaN	3.15965	1.24351	3.16823	5.53305	3.52276	4.35003	S	3	1454	___1	actin filament-based movement;actin filament-based process;actin-mediated cell contraction;actin-myosin filament sliding;anatomical structure development;apoptosis;astrocyte development;astrocyte differentiation;Bergmann glial cell differentiation;biological regulation;cell death;cell development;cell differentiation;cellular component disassembly;cellular component disassembly at cellular level;…	binding;double-stranded RNA binding;glycoprotein binding;identical protein binding;nucleic acid binding;protein binding;protein C-terminus binding;RNA binding;scaffold protein binding;structural constituent of cytoskeleton;structural constituent of eye lens;structural molecule activity	adherens junction;anchoring junction;cell junction;cell leading edge;cell part;cell projection;cell-substrate adherens junction;cell-substrate junction;cytoplasm;cytoplasmic part;cytoskeletal part;cytoskeleton;cytosol;extracellular membrane-bounded organelle;extracellular organelle;extracellular region part;extracellular vesicular exosome;focal adhesion;intermediate filament;intermediate filament…		14-3-3 domain binding motif;Calmodulin-dependent protein kinase II substrate motif;Casein kinase II substrate motif;G protein-coupled receptor kinase 1 substrate motif;Phosphorylase kinase substrate motif;PKA kinase substrate motif;PKC kinase substrate motif		0.999641	1.17e-10	103.79	18549000000	17571000000	977510000	39	38.1517
0.758828	-1.73641	-2.4484	NaN	NaN	-2.4925	1.33843	0.679999	-1.49246	-2.40679	-2.54324	2.10209	-2.60197	NaN	NaN	-2.64884	1.30657	-1.58608	-2.55775	0.963118	1.17555	0.710274	-0.908525	0.381679	-1.62625	NaN	-0.0266614	-2.49796	NaN	-2.54296	1.42744	-2.59472	S	3	1476	___1	apoptosis;base-excision repair, DNA ligation;biological regulation;catabolic process;cell activation;cell chemotaxis;cell death;cell migration;cell motility;cell projection organization;cellular catabolic process;cellular component disassembly;cellular component disassembly at cellular level;cellular component disassembly involved in apoptosis;cellular component movement;cellular component organi…	binding;chemoattractant activity;chromatin binding;cytokine activity;damaged DNA binding;DNA bending activity;DNA binding;double-stranded DNA binding;nucleic acid binding;nucleic acid binding transcription factor activity;protein binding;RAGE receptor binding;receptor binding;repressing transcription factor binding;sequence-specific DNA binding transcription factor activity;single-stranded DNA bi…	cell part;cell surface;chromosome;condensed chromosome;extracellular region;extracellular region part;extracellular space;intracellular membrane-bounded organelle;intracellular non-membrane-bounded organelle;intracellular organelle;intracellular organelle part;intracellular part;membrane-bounded organelle;non-membrane-bounded organelle;nuclear part;nucleoplasm;nucleus;organelle;organelle part	Base excision repair	G protein-coupled receptor kinase 1 substrate motif;GSK3 kinase substrate motif		1	4.43e-12	105.71	2243600000	1462800000	780890000	35	66.1282
-0.223395	-0.102975	1.01836	0.374336	-0.32488	0.0631108	-0.238437	-0.185555	1.00391	0.190874	0.536303	0.248719	0.994123	0.365426	-0.345258	0.0616087	-0.253393	0.980014	0.186331	0.147819	-0.0228854	0.571166	0.396739	0.0448292	-0.011274	0.615048	0.463299	1.08609	0.399232	0.0673081	-0.243264	0.571971	S	2	1491	___1	alternative nuclear mRNA splicing, via spliceosome;cellular macromolecule metabolic process;cellular metabolic process;cellular nitrogen compound metabolic process;cellular process;establishment of localization;establishment of localization in cell;establishment of RNA localization;gene expression;intracellular transport;macromolecule metabolic process;metabolic process;mRNA metabolic process;mRN…	binding;DNA binding;nucleic acid binding;nucleotide binding;RNA binding;single-stranded DNA binding;single-stranded RNA binding;structure-specific DNA binding	catalytic step 2 spliceosome;cell part;cytoplasm;cytoskeleton;extracellular membrane-bounded organelle;extracellular organelle;extracellular region part;extracellular vesicular exosome;intermediate filament cytoskeleton;intracellular non-membrane-bounded organelle;intracellular organelle;intracellular organelle part;intracellular part;macromolecular complex;membrane;membrane-bounded organelle;mem…	Spliceosome	b-Adrenergic Receptor kinase substrate motif;Calmodulin-dependent protein kinase II substrate motif;Casein kinase II substrate motif;Chk1 kinase substrate motif;ERK1,2 kinase substrate motif;G protein-coupled receptor kinase 1 substrate motif;Growth associated histone HI kinase substrate motif;GSK-3, ERK1, ERK2, CDK5 substrate motif;MAPKAPK2 kinase substrate motif;PKA kinase substrate motif;PKC k…		1	1.9e-50	180.02	199620000000	133520000000	66095000000	6	40.4317
0.362183	0.0157268	NaN	NaN	-0.0383555	0.4126	0.108893	0.454361	NaN	0.361836	0.62121	0.958654	NaN	NaN	-0.0407613	0.40278	0.106301	NaN	0.353224	0.69119	0.326103	1.03914	0.302041	0.269979	0.444524	NaN	0.399627	NaN	NaN	0.440041	0.116135	0.662525	S	2	1491	___1	alternative nuclear mRNA splicing, via spliceosome;cellular macromolecule metabolic process;cellular metabolic process;cellular nitrogen compound metabolic process;cellular process;establishment of localization;establishment of localization in cell;establishment of RNA localization;gene expression;intracellular transport;macromolecule metabolic process;metabolic process;mRNA metabolic process;mRN…	binding;DNA binding;nucleic acid binding;nucleotide binding;RNA binding;single-stranded DNA binding;single-stranded RNA binding;structure-specific DNA binding	catalytic step 2 spliceosome;cell part;cytoplasm;cytoskeleton;extracellular membrane-bounded organelle;extracellular organelle;extracellular region part;extracellular vesicular exosome;intermediate filament cytoskeleton;intracellular non-membrane-bounded organelle;intracellular organelle;intracellular organelle part;intracellular part;macromolecular complex;membrane;membrane-bounded organelle;mem…	Spliceosome	Casein kinase II substrate motif;G protein-coupled receptor kinase 1 substrate motif;GSK3 kinase substrate motif		1	1.9e-50	180.02	12194000000	8614100000	3580400000	2	40.4317
-0.734085	0.27864	0.904925	-0.249864	NaN	-0.328238	-0.457171	-0.785085	NaN	0.0569085	0.436179	NaN	0.883387	-0.265536	NaN	-0.348826	-0.485846	NaN	0.055554	NaN	-0.93542	0.196661	0.0261553	-0.251774	0.575312	NaN	NaN	0.965109	-0.254922	-0.334883	-0.466426	0.465188	S	3	1497	___1	anatomical structure homeostasis;base-excision repair;biological regulation;biosynthetic process;cell differentiation;cell surface receptor linked signaling pathway;cellular biosynthetic process;cellular component organization;cellular component organization at cellular level;cellular component organization or biogenesis;cellular component organization or biogenesis at cellular level;cellular dev…	binding;catalytic activity;cation binding;coenzyme binding;cofactor binding;DNA binding;enzyme binding;identical protein binding;ion binding;kinase binding;metal ion binding;NAD binding;NAD+ ADP-ribosyltransferase activity;nucleic acid binding;nucleotide binding;protein binding;protein kinase binding;protein N-terminus binding;transcription factor binding;transferase activity;transferase activity…	cell part;envelope;intracellular membrane-bounded organelle;intracellular non-membrane-bounded organelle;intracellular organelle;intracellular organelle part;intracellular part;macromolecular complex;membrane;membrane-bounded organelle;non-membrane-bounded organelle;nuclear envelope;nuclear part;nucleolus;nucleoplasm;nucleoplasm part;nucleus;organelle;organelle envelope;organelle part;protein com…	Base excision repair	14-3-3 domain binding motif;Calmodulin-dependent protein kinase II substrate motif;Calmodulin-dependent protein kinase IV substrate motif;Casein kinase II substrate motif;Chk1 kinase substrate motif;G protein-coupled receptor kinase 1 substrate motif;GSK3 kinase substrate motif;PKA kinase substrate motif;PKC kinase substrate motif		0.999776	1.08e-24	115.02	450100000	256210000	193890000	782	37.3496
-1.58136	NaN	NaN	-2.65151	-0.743421	-1.82915	NaN	-2.19976	NaN	NaN	-0.976583	NaN	NaN	-2.81782	-0.79005	-1.94387	NaN	NaN	NaN	-0.746586	NaN	-1.42453	-3.46544	-1.60874	-1.24954	NaN	-2.41618	NaN	-2.70519	-1.86617	NaN	-0.996353	S	3	1498	___1	anatomical structure homeostasis;biological regulation;biosynthetic process;cell cycle;cell cycle process;cell proliferation;cellular biosynthetic process;cellular component organization;cellular component organization at cellular level;cellular component organization or biogenesis;cellular component organization or biogenesis at cellular level;cellular macromolecule biosynthetic process;cellular…	3'-5' exonuclease activity;4 iron, 4 sulfur cluster binding;binding;catalytic activity;cation binding;chromatin binding;DNA binding;DNA polymerase activity;DNA-directed DNA polymerase activity;enzyme binding;exonuclease activity;hydrolase activity;hydrolase activity, acting on ester bonds;ion binding;iron-sulfur cluster binding;kinase binding;metal cluster binding;metal ion binding;nuclease activ…	alpha DNA polymerase:primase complex;cell part;chromosomal part;cytoplasm;envelope;intracellular membrane-bounded organelle;intracellular non-membrane-bounded organelle;intracellular organelle;intracellular organelle part;intracellular part;macromolecular complex;membrane-bounded organelle;non-membrane-bounded organelle;nuclear chromosome part;nuclear envelope;nuclear matrix;nuclear part;nucleolu…	DNA replication;Purine metabolism;Pyrimidine metabolism	Calmodulin-dependent protein kinase II substrate motif;Chk1 kinase substrate motif;G protein-coupled receptor kinase 1 substrate motif;GSK3 kinase substrate motif;Phosphorylase kinase substrate motif;Pim1 kinase substrate sequence;PKA kinase substrate motif;PKC kinase substrate motif		0.999991	1.28e-45	127.16	382510000	149380000	233130000	186	50.5071
3.70605	1.97762	3.11315	4.92369	2.64749	2.86676	2.35843	2.67988	4.94821	4.25826	2.60054	5.47076	3.03906	4.8065	2.58448	2.79852	2.3023	4.83043	4.1569	3.52178	4.10099	2.17328	0.995037	2.23619	2.68279	3.68179	1.83449	3.3202	5.25115	3.05742	2.51528	2.7735	S	2	1549;1753	___1	cellular component assembly;cellular component assembly at cellular level;cellular component organization;cellular component organization at cellular level;cellular component organization or biogenesis;cellular component organization or biogenesis at cellular level;cellular macromolecular complex assembly;cellular macromolecular complex subunit organization;cellular process;chromatin assembly;chr…	binding;chromatin binding;chromatin DNA binding;DNA binding;nucleic acid binding;structure-specific DNA binding	cell part;chromatin;chromosomal part;euchromatin;extracellular membrane-bounded organelle;extracellular organelle;extracellular region part;extracellular vesicular exosome;heterochromatin;intracellular membrane-bounded organelle;intracellular organelle;intracellular organelle part;intracellular part;macromolecular complex;membrane-bounded organelle;membrane-bounded vesicle;nuclear chromatin;nucle…		14-3-3 domain binding motif;Calmodulin-dependent protein kinase II substrate motif;Pim1 kinase substrate sequence;PKA kinase substrate motif;PKC epsilon kinase substrate motif;PKC kinase substrate motif		1	6.61e-50	180.32	19816000000	18328000000	1487800000	36	72.2815
0.848873	0.904894	0.399669	NaN	1.41526	0.327915	1.0668	0.139659	NaN	1.20518	NaN	NaN	0.390157	NaN	1.38158	0.32011	1.04141	NaN	1.1765	NaN	0.702511	0.299287	0.422658	-0.977767	-0.00476633	NaN	NaN	0.42625	NaN	0.349724	1.13775	NaN	S	2	1558	___1	actin cytoskeleton organization;actin filament-based process;activation of phospholipase C activity;activation of protein kinase A activity;activation of protein kinase activity;actomyosin structure organization;anatomical structure formation involved in morphogenesis;biological regulation;blood coagulation;cardiac muscle cell proliferation;cell cycle phase;cell cycle process;cell proliferation;c…	adenyl nucleotide binding;adenyl ribonucleotide binding;AMP binding;binding;cAMP binding;cAMP-dependent protein kinase inhibitor activity;cAMP-dependent protein kinase regulator activity;cyclic nucleotide binding;enzyme binding;enzyme inhibitor activity;enzyme regulator activity;kinase binding;kinase inhibitor activity;kinase regulator activity;nucleotide binding;protein binding;protein kinase A …	AMP-activated protein kinase complex;cAMP-dependent protein kinase complex;cell part;cytoplasmic part;cytosol;intracellular part;macromolecular complex;membrane;neuromuscular junction;plasma membrane;protein complex;synapse	Apoptosis;Insulin signaling pathway	Casein kinase I substrate motif;ERK1,2 kinase substrate motif;G protein-coupled receptor kinase 1 substrate motif;GSK-3, ERK1, ERK2, CDK5 substrate motif;WW domain binding motif		0.999995	4.37e-16	111.65	4137700000	2757600000	1380200000	83	52.6988
-2.29751	-1.22129	-0.391772	-1.47122	-1.72534	-1.56546	-1.99555	-2.11502	-2.20811	-1.38243	-0.94524	-1.93657	-0.416345	-1.56349	-1.83356	-1.66366	-2.12072	-2.34661	-1.46914	-1.86481	-2.03022	-1.02077	-1.15505	-1.24274	-1.37421	NaN	NaN	-0.399703	-1.501	-1.59716	-2.03595	-0.964375	S	2	1564	___1	activation of caspase activity;activation of immune response;activation of innate immune response;adaptive immune response;adaptive immune response based on somatic recombination of immune receptors built from immunoglobulin superfamily domains;B cell activation;B cell activation involved in immune response;B cell cytokine production;B cell mediated immunity;B cell proliferation;biological regula…	adenyl nucleotide binding;adenyl ribonucleotide binding;ATP binding;ATPase activity;binding;catalytic activity;chaperone binding;DNA binding;DNA replication origin binding;double-stranded RNA binding;enzyme binding;hydrolase activity;hydrolase activity, acting on acid anhydrides;hydrolase activity, acting on acid anhydrides, in phosphorus-containing anhydrides;lipopolysaccharide binding;nucleic a…	cell part;cell surface;coated pit;coated vesicle;cytoplasm;cytoplasmic membrane-bounded vesicle;cytoplasmic part;cytoplasmic vesicle;cytosol;early endosome;endosome;extracellular membrane-bounded organelle;extracellular organelle;extracellular region part;extracellular space;extracellular vesicular exosome;intracellular membrane-bounded organelle;intracellular organelle;intracellular organelle lu…	ko05152;RNA degradation;Type I diabetes mellitus	ERK1,2 kinase substrate motif;G protein-coupled receptor kinase 1 substrate motif;Growth associated histone HI kinase substrate motif;GSK-3, ERK1, ERK2, CDK5 substrate motif;PKA kinase substrate motif;PKC kinase substrate motif;WW domain binding motif		0.999957	3.04e-17	136.81	516360000	195740000	320630000	70	43.6535
-0.223679	-1.32245	NaN	1.82011	NaN	-0.382618	0.655312	NaN	3.52162	NaN	NaN	2.49595	NaN	1.77679	NaN	-0.406617	0.639715	3.4378	NaN	0.0560203	0.269976	0.756607	0.54436	-0.185737	0.239757	NaN	0.230841	NaN	1.94116	-0.390364	0.698895	NaN	S	2	1573	___1	actin cytoskeleton organization;actin filament-based process;biological regulation;blood circulation;cellular component organization;cellular component organization at cellular level;cellular component organization or biogenesis;cellular component organization or biogenesis at cellular level;cellular process;circulatory system process;cortical actin cytoskeleton organization;cortical cytoskeleton…	1-phosphatidylinositol binding;binding;cytoskeletal protein binding;lipid binding;phosphatidylinositol binding;phospholipid binding;protein binding;spectrin binding;structural constituent of cytoskeleton;structural molecule activity	cell cortex part;cell part;cortical cytoskeleton;cytoplasmic part;cytoskeletal part;cytoskeleton;extrinsic to membrane;Golgi apparatus;intracellular membrane-bounded organelle;intracellular non-membrane-bounded organelle;intracellular organelle;intracellular organelle part;intracellular part;macromolecular complex;membrane;membrane part;membrane-bounded organelle;non-membrane-bounded organelle;nu…	Tight junction	G protein-coupled receptor kinase 1 substrate motif		1	4.43e-21	134.88	242600000	151420000	91184000	542	88.2881
0.852499	1.56453	-1.689	-0.795319	1.26909	-0.508873	0.662212	0.454361	-0.43955	-0.56927	-0.687273	-0.261764	-1.79493	-0.845204	1.23888	-0.540791	0.64645	-0.46712	-0.604977	0.108581	0.209181	-0.746352	-0.504062	0.29407	-0.206905	NaN	0.573696	-1.72319	-0.811419	-0.519174	0.706253	-0.701186	S	2	1578;1579	___1	alcohol metabolic process;carbohydrate catabolic process;carbohydrate metabolic process;catabolic process;cellular carbohydrate catabolic process;cellular carbohydrate metabolic process;cellular glucan metabolic process;cellular macromolecule metabolic process;cellular metabolic process;cellular polysaccharide catabolic process;cellular polysaccharide metabolic process;cellular process;energy der…	binding;catalytic activity;cofactor binding;glycogen phosphorylase activity;nucleotide binding;phosphorylase activity;pyridoxal phosphate binding;transferase activity;transferase activity, transferring glycosyl groups;transferase activity, transferring hexosyl groups;vitamin B6 binding;vitamin binding	cell part;cytoplasm;cytoplasmic part;cytosol;extracellular membrane-bounded organelle;extracellular organelle;extracellular region part;extracellular vesicular exosome;intracellular part;membrane;membrane-bounded organelle;membrane-bounded vesicle;organelle;vesicle	Insulin signaling pathway;Starch and sucrose metabolism	Phosphorylase kinase substrate motif;PKA kinase substrate motif;PKC kinase substrate motif		1	0.0680594	91.783	1477900000	974490000	503390000	15	77.3176
-2.1363	-2.89538	NaN	-2.42374	-2.5345	-1.67383	-2.54802	-2.40466	-2.14998	-0.343355	-2.01123	NaN	NaN	-2.57577	-2.69347	-1.77882	-2.70784	-2.28483	-0.364891	-1.53234	-2.12719	NaN	-1.09111	-1.90417	-1.49905	NaN	-2.54381	NaN	-2.47281	-1.70772	-2.59961	-2.05194	S	2	1589	___1	biological regulation;biosynthetic process;cell death;cell division;cellular biosynthetic process;cellular component organization;cellular component organization at cellular level;cellular component organization or biogenesis;cellular component organization or biogenesis at cellular level;cellular macromolecule biosynthetic process;cellular macromolecule metabolic process;cellular metabolic proce…	ATPase activity;ATPase activity, coupled;binding;catalytic activity;chromatin binding;core promoter binding;core promoter sequence-specific DNA binding;DNA binding;DNA topoisomerase (ATP-hydrolyzing) activity;DNA topoisomerase activity;DNA topoisomerase type I activity;DNA-dependent ATPase activity;hydrolase activity;hydrolase activity, acting on acid anhydrides;hydrolase activity, acting on acid…	cell part;chromosomal part;cytoplasmic mRNA processing body;cytoplasmic part;intracellular membrane-bounded organelle;intracellular non-membrane-bounded organelle;intracellular organelle;intracellular organelle part;intracellular part;macromolecular complex;membrane-bounded organelle;non-membrane-bounded organelle;nuclear chromosome part;nuclear part;nucleolus;nucleoplasm;nucleus;organelle;organe…		ATM kinase substrate motif;b-Adrenergic Receptor kinase substrate motif;Casein kinase II substrate motif;DNA dependent Protein kinase substrate motif;G protein-coupled receptor kinase 1 substrate motif		1	6.25e-53	163.79	947490000	328280000	619220000	10	73.6585
NaN	-2.88261	-1.83774	-2.72856	NaN	-1.49359	NaN	-3.43246	-1.87303	-1.38001	-2.04015	-1.91332	-1.95301	-2.8997	NaN	-1.58727	NaN	-1.99051	-1.46657	NaN	-3.04958	-1.61448	-3.69359	-3.92102	-2.07788	NaN	NaN	-1.87494	-2.7838	-1.52383	NaN	-2.08145	S	3	1590	___1	apoptotic chromosome condensation;biological regulation;cell cycle;cell cycle process;cell differentiation;cell division;cellular component organization;cellular component organization at cellular level;cellular component organization or biogenesis;cellular component organization or biogenesis at cellular level;cellular developmental process;cellular macromolecule metabolic process;cellular metab…	adenyl nucleotide binding;adenyl ribonucleotide binding;ATP binding;ATPase activity;ATPase activity, coupled;binding;catalytic activity;cation binding;chromatin binding;DNA bending activity;DNA binding;DNA topoisomerase (ATP-hydrolyzing) activity;DNA topoisomerase activity;DNA-dependent ATPase activity;drug binding;enzyme binding;histone deacetylase binding;hydrolase activity;hydrolase activity, …	cell part;chromosome;condensed chromosome;cytoplasm;DNA topoisomerase complex (ATP-hydrolyzing);intracellular membrane-bounded organelle;intracellular non-membrane-bounded organelle;intracellular organelle;intracellular organelle part;intracellular part;macromolecular complex;membrane-bounded organelle;non-membrane-bounded organelle;nuclear part;nucleolus;nucleoplasm;nucleus;organelle;organelle p…		b-Adrenergic Receptor kinase substrate motif;Casein kinase II substrate motif		0.999999	6.66e-88	205.02	1247000000	303140000	943830000	1106	58.7991
1.33125	-0.537447	NaN	NaN	1.15908	-1.28651	0.473725	1.79658	NaN	-1.96083	0.27309	NaN	NaN	NaN	1.13149	-1.3672	0.46245	NaN	-2.08382	1.47666	NaN	-0.429006	NaN	NaN	0.107983	NaN	0.808246	NaN	NaN	-1.31255	0.505231	0.291252	S	3	1614	___1	biological regulation;biosynthetic process;carbohydrate metabolic process;carbohydrate transport;cell cycle;cell cycle checkpoint;cell cycle phase;cell cycle process;cell division;cell surface receptor linked signaling pathway;cellular biosynthetic process;cellular component disassembly;cellular component disassembly at cellular level;cellular component organization;cellular component organizatio…	binding;chromatin binding;cytoskeletal protein binding;dynein complex binding;enzyme binding;heat shock protein binding;identical protein binding;kinase binding;mitogen-activated protein kinase binding;mRNA binding;nucleic acid binding;nucleocytoplasmic transporter activity;protein binding;protein complex binding;protein dimerization activity;protein homodimerization activity;protein kinase bindi…	cell part;chromosomal part;cytoplasm;cytoplasmic dynein complex;cytoplasmic part;cytoskeletal part;dynein complex;envelope;extrinsic to membrane;inclusion body;intracellular membrane-bounded organelle;intracellular non-membrane-bounded organelle;intracellular organelle;intracellular organelle part;intracellular part;kinetochore;macromolecular complex;membrane;membrane part;membrane-bounded organe…	MAPK signaling pathway - yeast;Pathways in cancer;RNA transport;Thyroid cancer	ERK1,2 kinase substrate motif;G protein-coupled receptor kinase 1 substrate motif;GSK-3, ERK1, ERK2, CDK5 substrate motif;WW domain binding motif		1	2.27e-53	154.65	553540000	408600000	144940000	2155	95.6726
-0.316965	0.924526	0.801272	-0.154757	NaN	-0.618493	-0.102247	0.628989	0.692933	-0.119243	-0.788461	1.05919	0.7822	-0.164464	NaN	-0.657287	-0.108661	0.676441	-0.126722	0.236078	0.883089	1.83487	0.90683	0.0201987	0.610088	NaN	0.692681	0.854562	-0.15789	-0.631014	-0.104317	-0.804423	S	3	1621	___1	amine catabolic process;amine metabolic process;branched chain family amino acid catabolic process;branched chain family amino acid metabolic process;carboxylic acid catabolic process;carboxylic acid metabolic process;catabolic process;cellular amine metabolic process;cellular amino acid catabolic process;cellular amino acid metabolic process;cellular catabolic process;cellular ketone metabolic p…	3-methyl-2-oxobutanoate dehydrogenase (2-methylpropanoyl-transferring) activity;alpha-ketoacid dehydrogenase activity;binding;carbon-carbon lyase activity;carboxy-lyase activity;catalytic activity;cation binding;ion binding;lyase activity;metal ion binding;oxidoreductase activity;oxidoreductase activity, acting on the aldehyde or oxo group of donors;oxidoreductase activity, acting on the aldehyde…	cell part;cytoplasmic part;dihydrolipoyl dehydrogenase complex;intracellular membrane-bounded organelle;intracellular organelle;intracellular organelle lumen;intracellular organelle part;intracellular part;macromolecular complex;membrane-bounded organelle;membrane-enclosed lumen;mitochondrial alpha-ketoglutarate dehydrogenase complex;mitochondrial matrix;mitochondrial part;mitochondrial tricarbox…	Valine, leucine and isoleucine degradation	Branched chain alpha-ketoacid dehydrogenase kinase substrate motif;Casein kinase II substrate motif;Pyruvate dehydrogenase kinase substrate motif		0.999192	3.56e-130	246.38	15051000000	11162000000	3888300000	337	30.969
-0.0769936	0.613188	1.72757	NaN	-0.265514	-0.170469	-0.555008	0.589063	1.39299	0.295601	0.420682	1.3811	1.68645	NaN	-0.282168	-0.181161	-0.58982	1.35984	0.288566	0.563331	0.591269	1.57716	1.24461	0.624709	0.738501	NaN	0.544621	1.84246	NaN	-0.17392	-0.566244	0.44866	S	3	1621	___1	amine catabolic process;amine metabolic process;branched chain family amino acid catabolic process;branched chain family amino acid metabolic process;carboxylic acid catabolic process;carboxylic acid metabolic process;catabolic process;cellular amine metabolic process;cellular amino acid catabolic process;cellular amino acid metabolic process;cellular catabolic process;cellular ketone metabolic p…	3-methyl-2-oxobutanoate dehydrogenase (2-methylpropanoyl-transferring) activity;alpha-ketoacid dehydrogenase activity;binding;carbon-carbon lyase activity;carboxy-lyase activity;catalytic activity;cation binding;ion binding;lyase activity;metal ion binding;oxidoreductase activity;oxidoreductase activity, acting on the aldehyde or oxo group of donors;oxidoreductase activity, acting on the aldehyde…	cell part;cytoplasmic part;dihydrolipoyl dehydrogenase complex;intracellular membrane-bounded organelle;intracellular organelle;intracellular organelle lumen;intracellular organelle part;intracellular part;macromolecular complex;membrane-bounded organelle;membrane-enclosed lumen;mitochondrial alpha-ketoglutarate dehydrogenase complex;mitochondrial matrix;mitochondrial part;mitochondrial tricarbox…	Valine, leucine and isoleucine degradation	Branched chain alpha-ketoacid dehydrogenase kinase substrate motif;Casein kinase II substrate motif;MAPKAPK2 kinase substrate motif		1	3.56e-130	198.15	8304300000	6251600000	2052700000	347	107.241
1.82868	4.85116	NaN	2.91969	2.01228	NaN	2.03074	NaN	NaN	NaN	-0.082203	NaN	NaN	2.8502	1.96439	NaN	1.98241	NaN	NaN	NaN	NaN	-1.04805	1.30641	0.809685	-0.765643	NaN	2.48671	NaN	3.11387	NaN	2.1658	-0.0838671	S	5	1629	___1	actin cytoskeleton organization;actin filament bundle assembly;actin filament organization;actin filament-based process;activation of immune response;activation of innate immune response;activation of protein kinase activity;activation of protein kinase B activity;adherens junction organization;anatomical structure development;anatomical structure homeostasis;anatomical structure morphogenesis;ax…	adenyl nucleotide binding;adenyl ribonucleotide binding;ATP binding;binding;binding, bridging;catalytic activity;cation binding;enzyme binding;ephrin receptor binding;growth factor receptor binding;heme binding;hormone receptor binding;integrin binding;ion binding;ion channel binding;iron ion binding;kinase activity;metal ion binding;non-membrane spanning protein tyrosine kinase activity;nucleoti…	actin filament;caveola;cell part;cell projection;cell projection membrane;cell projection part;cytoplasm;cytoplasmic part;cytoskeletal part;cytosol;endosome;extracellular membrane-bounded organelle;extracellular organelle;extracellular region part;extracellular vesicular exosome;extrinsic to internal side of plasma membrane;extrinsic to membrane;extrinsic to plasma membrane;intracellular membrane…	Adherens junction;Bacterial invasion of epithelial cells;Endocytosis;Epithelial cell signaling in Helicobacter pylori infection;ErbB signaling pathway;Focal adhesion;Gap junction;GnRH signaling pathway;ko05152;Tight junction;VEGF signaling pathway	14-3-3 domain binding motif;Aurora-A kinase substrate motif;Calmodulin-dependent protein kinase II substrate motif;Casein kinase II substrate motif;G protein-coupled receptor kinase 1 substrate motif;PAK2 kinase substrate motif;Phosphorylase kinase substrate motif;PKA kinase substrate motif;PKC epsilon kinase substrate motif;PKC kinase substrate motif		1	7.33e-29	105.66	1919500000	1669000000	250550000	17	76.2455
NaN	2.95279	3.73853	3.33322	NaN	1.1532	NaN	1.95491	NaN	2.67873	2.69589	2.88351	3.64955	3.25388	NaN	1.12575	NaN	NaN	2.61497	3.21713	2.87561	2.61807	3.45663	2.7135	3.10688	NaN	2.8187	3.98717	3.5549	1.22989	NaN	2.87519	S	4	1632	___1	anatomical structure development;anatomical structure maturation;B cell activation;B cell differentiation;biological regulation;biosynthetic process;blood vessel maturation;cell activation;cell differentiation;cellular biosynthetic process;cellular developmental process;cellular macromolecule biosynthetic process;cellular macromolecule metabolic process;cellular metabolic process;cellular nitroge…	binding;DNA binding;nucleic acid binding;nucleic acid binding transcription factor activity;regulatory region DNA binding;regulatory region nucleic acid binding;RNA polymerase II regulatory region DNA binding;RNA polymerase II regulatory region sequence-specific DNA binding;sequence-specific DNA binding;sequence-specific DNA binding RNA polymerase II transcription factor activity;sequence-specifi…	cell part;intracellular membrane-bounded organelle;intracellular organelle;intracellular part;membrane-bounded organelle;nucleus;organelle		14-3-3 domain binding motif;AMP-activated protein kinase substrate motif;Calmodulin-dependent protein kinase I substrate motif;Calmodulin-dependent protein kinase II substrate motif;Calmodulin-dependent protein kinase IV substrate motif;Casein kinase II substrate motif;Chk1 kinase substrate motif;DNA dependent Protein kinase substrate motif;PAK2 kinase substrate motif;Pim1 kinase substrate sequen…		1	4.45e-38	166.49	1932200000	1779400000	152770000	134	56.4882
0.945646	7.62053	4.45203	9.23247	5.18465	NaN	2.25318	2.70433	5.94594	4.77667	3.78784	NaN	4.34607	9.01272	5.06124	NaN	2.19955	5.80442	4.66298	NaN	3.59644	3.79648	3.20112	3.19219	2.62186	NaN	NaN	4.74812	9.84649	NaN	2.40303	4.03976	S	2	1638	___1	biological adhesion;biological regulation;blood coagulation;blood coagulation, intrinsic pathway;cell activation;cell adhesion;cell surface receptor linked signaling pathway;cellular process;cellular response to stimulus;coagulation;hemostasis;macromolecule metabolic process;metabolic process;multicellular organismal process;platelet activation;primary metabolic process;protein activation cascade…	molecular transducer activity;receptor activity;signal transducer activity;signaling receptor activity;transmembrane signaling receptor activity	cell part;integral to membrane;integral to plasma membrane;intrinsic to membrane;intrinsic to plasma membrane;membrane;membrane part;plasma membrane;plasma membrane part	ECM-receptor interaction;Hematopoietic cell lineage	Casein kinase II substrate motif;G protein-coupled receptor kinase 1 substrate motif;PKA kinase substrate motif;PKC kinase substrate motif;Pyruvate dehydrogenase kinase substrate motif		1	4.08e-05	113.25	5016300000	4920900000	95443000	191	72.6617
-0.683512	-2.85246	-1.92963	-2.10046	0.081736	-2.76681	-0.782283	-1.59901	NaN	-3.4754	-1.6084	-1.45841	-2.05066	-2.2322	0.0797906	-2.94035	-0.83135	NaN	-3.69339	-2.60123	-1.86595	-3.23466	NaN	-1.59762	-1.2614	NaN	NaN	-1.96869	-2.14298	-2.82282	-0.798119	-1.64096	S	2	1641	___1	biological regulation;catabolic process;cellular catabolic process;cellular macromolecule catabolic process;cellular macromolecule metabolic process;cellular metabolic process;cellular nitrogen compound metabolic process;cellular process;macromolecule catabolic process;macromolecule metabolic process;metabolic process;mRNA catabolic process;mRNA metabolic process;negative regulation of catalytic …	enzyme inhibitor activity;enzyme regulator activity;ribonuclease inhibitor activity	angiogenin-PRI complex;cell part;cytoplasm;extracellular membrane-bounded organelle;extracellular organelle;extracellular region part;extracellular vesicular exosome;intracellular part;macromolecular complex;membrane-bounded organelle;membrane-bounded vesicle;organelle;protein complex;vesicle				1	3.44e-53	154.34	445910000	179310000	266600000	2	67.0776
-0.523703	-0.543482	-0.484334	0.0260996	0.0608823	-0.565418	-0.188972	-0.561461	-0.519154	-0.281625	0.0500183	-0.639653	-0.514713	0.0254784	0.0594332	-0.600882	-0.200825	-0.551717	-0.29929	-0.0075807	-0.0176877	0.136095	-1.86203	-0.319843	-0.205277	NaN	-0.207571	-0.494139	0.0278354	-0.576864	-0.192798	0.0533449	S	2	1649	___1	anatomical structure development;anatomical structure morphogenesis;B cell activation;B cell differentiation;biological adhesion;biological regulation;blood coagulation;blood vessel remodeling;cell activation;cell adhesion;cell differentiation;cell migration;cell morphogenesis;cell morphogenesis involved in differentiation;cell motility;cell surface receptor linked signaling pathway;cell-cell adh…	binding;cation binding;cell adhesion molecule binding;ion binding;metal ion binding;protein binding	adherens junction;alpha4-beta7 integrin complex;anchoring junction;cell junction;cell part;cell surface;cell-cell junction;cell-substrate adherens junction;cell-substrate junction;external side of plasma membrane;extracellular membrane-bounded organelle;extracellular organelle;extracellular region part;extracellular vesicular exosome;focal adhesion;integrin complex;macromolecular complex;membrane…	Arrhythmogenic right ventricular cardiomyopathy (ARVC);Cell adhesion molecules (CAMs);Dilated cardiomyopathy;ECM-receptor interaction;Focal adhesion;Hematopoietic cell lineage;Hypertrophic cardiomyopathy (HCM);Intestinal immune network for IgA production;Leishmaniasis;Leukocyte transendothelial migration;Regulation of actin cytoskeleton	14-3-3 domain binding motif;b-Adrenergic Receptor kinase substrate motif;Calmodulin-dependent protein kinase II substrate motif;Casein kinase II substrate motif;PAK2 kinase substrate motif;PKA kinase substrate motif;PKC epsilon kinase substrate motif;PKC kinase substrate motif		0.99998	1.79e-36	200.19	3173200000	1827900000	1345300000	1021	47.084
1.07754	-0.685259	-2.02124	-0.509849	0.613113	-1.53205	0.186809	1.327	-1.32122	-1.60831	-0.869829	0.681129	-2.14802	-0.541828	0.598521	-1.62814	0.182362	-1.40409	-1.70919	0.579707	0.400891	-1.7578	-1.1463	-0.421274	-0.451593	-3.16285	-0.432215	-2.06216	-0.52017	-1.56306	0.199233	-0.887438	S	2	1664	___1	actin cytoskeleton organization;actin filament bundle assembly;actin filament organization;actin filament-based process;anatomical structure morphogenesis;biological regulation;cell activation;cell activation involved in immune response;cell migration;cell motility;cellular component assembly;cellular component assembly at cellular level;cellular component disassembly;cellular component disassemb…	actin binding;actin filament binding;binding;calcium ion binding;cation binding;cytoskeletal protein binding;enzyme binding;GTPase binding;ion binding;metal ion binding;protein binding	actin cytoskeleton;actin filament;actin filament bundle;adherens junction;anchoring junction;cell junction;cell part;cell projection;cell projection membrane;cell projection part;cell-substrate adherens junction;cell-substrate junction;cytoplasm;cytoplasmic part;cytoskeletal part;cytoskeleton;cytosol;extracellular membrane-bounded organelle;extracellular organelle;extracellular region part;extrac…		Casein kinase II substrate motif;PKA kinase substrate motif;PKC kinase substrate motif;Pyruvate dehydrogenase kinase substrate motif		1	7.1e-167	270.56	72612000000	50516000000	22096000000	5	47.6398
-0.237068	-1.61903	-2.3209	-1.07102	0.25834	-2.10599	-0.414799	-0.16715	NaN	-1.0263	-2.32618	-0.426857	-2.46647	-1.1382	0.252191	-2.23808	-0.440816	NaN	-1.09068	-0.595849	-0.428104	-1.9158	-2.10829	-0.576075	-0.653048	NaN	-0.808359	-2.36789	-1.0927	-2.14862	-0.423196	-2.37327	S	2	1664	___1	actin cytoskeleton organization;actin filament bundle assembly;actin filament organization;actin filament-based process;anatomical structure morphogenesis;biological regulation;cell activation;cell activation involved in immune response;cell migration;cell motility;cellular component assembly;cellular component assembly at cellular level;cellular component disassembly;cellular component disassemb…	actin binding;actin filament binding;binding;calcium ion binding;cation binding;cytoskeletal protein binding;enzyme binding;GTPase binding;ion binding;metal ion binding;protein binding	actin cytoskeleton;actin filament;actin filament bundle;adherens junction;anchoring junction;cell junction;cell part;cell projection;cell projection membrane;cell projection part;cell-substrate adherens junction;cell-substrate junction;cytoplasm;cytoplasmic part;cytoskeletal part;cytoskeleton;cytosol;extracellular membrane-bounded organelle;extracellular organelle;extracellular region part;extrac…		AMP-activated protein kinase substrate motif;b-Adrenergic Receptor kinase substrate motif;Casein kinase I substrate motif;Casein kinase II substrate motif;Pyruvate dehydrogenase kinase substrate motif		1	2.83e-09	123.95	2398300000	1317600000	1080700000	257	40.7274
0.856164	0.160235	-0.33873	0.572063	1.08384	0.0606971	0.750579	-0.299938	0.995766	0.538725	-0.426841	1.06867	-0.359976	0.558447	1.05805	0.0592524	0.732715	0.972066	0.525903	0.289421	0.153186	-0.228798	-0.211256	0.654076	-0.407907	NaN	0.0494275	-0.345587	0.610109	0.0647339	0.800498	-0.435482	S	2	1669	___1	activation of phospholipase C activity;activation of protein kinase A activity;activation of protein kinase activity;biological regulation;blood coagulation;cell surface receptor linked signaling pathway;cellular metabolic process;cellular process;cellular response to chemical stimulus;cellular response to endogenous stimulus;cellular response to fibroblast growth factor stimulus;cellular respons…	adenyl nucleotide binding;adenyl ribonucleotide binding;AMP binding;binding;cAMP binding;cAMP-dependent protein kinase inhibitor activity;cAMP-dependent protein kinase regulator activity;cyclic nucleotide binding;enzyme binding;enzyme inhibitor activity;enzyme regulator activity;kinase binding;kinase inhibitor activity;kinase regulator activity;nucleotide binding;protein binding;protein kinase A …	adherens junction;AMP-activated protein kinase complex;anchoring junction;cAMP-dependent protein kinase complex;cell junction;cell part;cell-substrate adherens junction;cell-substrate junction;centrosome;cytoplasm;cytoplasmic part;cytoskeletal part;cytosol;extracellular membrane-bounded organelle;extracellular organelle;extracellular region part;extracellular vesicular exosome;focal adhesion;intr…	Apoptosis;Insulin signaling pathway	14-3-3 domain binding motif;Aurora-A kinase substrate motif;Calmodulin-dependent protein kinase II alpha substrate motif;Calmodulin-dependent protein kinase II substrate motif;Calmodulin-dependent protein kinase IV substrate motif;PAK2 kinase substrate motif;Phosphorylase kinase substrate motif;PKA kinase substrate motif;PKC epsilon kinase substrate motif;PKC kinase substrate motif		1	1.16e-73	161.5	20072000000	13742000000	6329400000	99	65.8431
0.995108	NaN	NaN	-0.479408	0.0838973	-0.531976	0.946662	0.644263	NaN	0.72636	-0.51923	NaN	NaN	-0.509478	0.0819004	-0.565343	0.924131	NaN	0.709072	NaN	-0.341861	NaN	0.877155	NaN	-0.360685	NaN	-0.754309	NaN	-0.489113	-0.542745	1.00962	-0.529742	S	3	1672	___1	multi-organism process;response to biotic stimulus;response to other organism;response to stimulus;response to virus				14-3-3 domain binding motif;Calmodulin-dependent protein kinase II substrate motif;Calmodulin-dependent protein kinase IV substrate motif;Chk1 kinase substrate motif;G protein-coupled receptor kinase 1 substrate motif;PAK2 kinase substrate motif;PKA kinase substrate motif;PKC epsilon kinase substrate motif;PKC kinase substrate motif		0.999949	2.67e-14	108.96	197390000	120170000	77219000	300	42.917
-1.33403	-1.34686	-1.8949	-1.54439	-0.465388	-1.53663	-0.838576	-2.19124	-1.46625	-1.27459	-2.15164	-1.83556	-2.01375	-1.64126	-0.494579	-1.63302	-0.891174	-1.55822	-1.35454	-1.76195	-2.55511	-1.35471	-1.68147	-1.69646	-1.91988	NaN	-2.04219	-1.93326	-1.57565	-1.56774	-0.855552	-2.19519	S	3	1680	___1	actin cytoskeleton organization;actin filament organization;actin filament polymerization;actin filament-based process;actin polymerization or depolymerization;biological regulation;cell differentiation;cellular component assembly;cellular component assembly at cellular level;cellular component organization;cellular component organization at cellular level;cellular component organization or bioge…	binding;enzyme binding;kinase binding;protein binding;protein kinase binding;RNA polymerase II transcription factor binding;transcription factor binding	cell part;cytoplasm;cytoplasmic part;intracellular membrane-bounded organelle;intracellular organelle;intracellular organelle part;intracellular part;macromolecular complex;membrane;membrane-bounded organelle;mitochondrion;nuclear part;nucleoplasm part;nucleus;organelle;organelle part;protein complex;transcription factor complex	Bacterial invasion of epithelial cells;Pathogenic Escherichia coli infection;Shigellosis;Tight junction	Casein kinase II substrate motif;ERK1,2 kinase substrate motif;G protein-coupled receptor kinase 1 substrate motif;Growth associated histone HI kinase substrate motif;GSK-3, ERK1, ERK2, CDK5 substrate motif;PKA kinase substrate motif;PKC kinase substrate motif;WW domain binding motif		1	1.9e-50	132.53	9128200000	3631900000	5496200000	275	60.9505
-0.849988	-2.14555	-1.71388	-1.48117	-0.859722	-0.417374	-1.12877	-1.38716	-2.20375	0.0200035	-1.06177	-2.20312	-1.82138	-1.57408	-0.913647	-0.443553	-1.19957	-2.34197	0.0195273	-2.41569	-2.49176	-2.88488	-0.496401	-2.57289	-1.19342	NaN	-2.99997	-1.74858	-1.51116	-0.425824	-1.15162	-1.08326	S	2	1717	___1	biological regulation;biosynthetic process;cell death;cellular biosynthetic process;cellular macromolecule biosynthetic process;cellular macromolecule metabolic process;cellular metabolic process;cellular nitrogen compound metabolic process;cellular process;cellular response to chemical stimulus;cellular response to endogenous stimulus;cellular response to hormone stimulus;cellular response to or…	binding;DNA binding;double-stranded DNA binding;nucleic acid binding;nucleic acid binding transcription factor activity;regulatory region DNA binding;regulatory region nucleic acid binding;RNA polymerase II regulatory region DNA binding;RNA polymerase II regulatory region sequence-specific DNA binding;sequence-specific DNA binding;sequence-specific DNA binding transcription factor activity;struct…	cell part;intracellular membrane-bounded organelle;intracellular organelle;intracellular organelle part;intracellular part;membrane-bounded organelle;nuclear part;nucleoplasm;nucleus;organelle;organelle part	Osteoclast differentiation	Casein kinase I substrate motif;ERK1,2 kinase substrate motif;G protein-coupled receptor kinase 1 substrate motif;Growth associated histone HI kinase substrate motif;GSK-3, ERK1, ERK2, CDK5 substrate motif;PKA kinase substrate motif;PKC kinase substrate motif;WW domain binding motif		1	7.04e-15	134.99	2285400000	1015400000	1270000000	200	46.0691
1.75793	1.60002	1.09175	2.04057	1.1502	2.99373	2.38982	1.3611	2.35694	2.46942	2.67489	1.561	1.06577	1.992	1.12282	2.92247	2.33294	2.30084	2.41064	0.647433	0.797405	0.89841	2.194	0.354202	1.24317	NaN	0.957143	1.16436	2.17629	3.19283	2.54876	2.85279	S	2	1737	___1	amine metabolic process;aminoglycan catabolic process;aminoglycan metabolic process;anatomical structure development;anatomical structure morphogenesis;biological adhesion;biological regulation;blood coagulation;branching involved in prostate gland morphogenesis;branching involved in ureteric bud morphogenesis;branching morphogenesis of a tube;carbohydrate catabolic process;carbohydrate metabolic…	binding;carbohydrate binding;catalytic activity;collagen binding;glycosaminoglycan binding;hexosaminidase activity;hyaluronic acid binding;hyalurononglucosaminidase activity;hydrolase activity;hydrolase activity, acting on glycosyl bonds;hydrolase activity, hydrolyzing O-glycosyl compounds;pattern binding;polysaccharide binding;protein binding	adherens junction;anchoring junction;basolateral plasma membrane;cell junction;cell part;cell surface;cell-substrate adherens junction;cell-substrate junction;cytoplasm;cytoplasmic part;external side of plasma membrane;extracellular membrane-bounded organelle;extracellular organelle;extracellular region part;extracellular vesicular exosome;focal adhesion;Golgi apparatus;integral to membrane;integ…	ECM-receptor interaction;Hematopoietic cell lineage;Shigellosis	ATM kinase substrate motif;Casein kinase II substrate motif;DNA dependent Protein kinase substrate motif	+	1	7.22e-101	224.07	6491600000	5646300000	845250000	304	125.839
-0.959667	0.280002	0.883451	0.793021	-1.81771	0.479675	-1.25821	-0.12146	0.074458	-0.338454	0.984389	-0.765792	0.862424	0.774146	-1.93172	0.468258	-1.33713	0.0726858	-0.359683	0.306972	0.26004	1.10162	-2.09105	-1.11895	-0.0883373	NaN	-2.04635	0.942207	0.845762	0.511577	-1.28368	1.04986	S	3	1741	___1	biological regulation;blood coagulation;cell migration;cell motility;cell surface receptor linked signaling pathway;cellular component movement;cellular defense response;cellular process;cellular response to stimulus;chemotaxis;coagulation;defense response;defense response to bacterium;establishment or maintenance of cell polarity;hemostasis;immune response;immune system process;leukocyte migrati…	molecular transducer activity;receptor activity;signal transducer activity;signaling receptor activity;transmembrane signaling receptor activity	basement membrane;cell part;cell projection;cell surface;external side of plasma membrane;extracellular matrix part;extracellular membrane-bounded organelle;extracellular organelle;extracellular region part;extracellular space;extracellular vesicular exosome;integral to membrane;integral to plasma membrane;intrinsic to membrane;intrinsic to plasma membrane;membrane;membrane part;membrane-bounded …	Cell adhesion molecules (CAMs)	G protein-coupled receptor kinase 1 substrate motif;PKA kinase substrate motif;PKC kinase substrate motif		0.999954	2.4e-28	113.65	4574200000	3028700000	1545500000	336	48.1758
0.0889815	-0.299131	-0.567832	0.00772292	0.118718	-0.416659	-0.0857124	0.0132368	-0.100576	-0.383786	-0.162255	-0.13599	-0.603449	0.0075391	0.115893	-0.442793	-0.0910885	-0.106884	-0.407859	0.275742	0.458156	-0.0225722	-1.2448	-0.493839	-0.314951	-0.973585	0.598204	-0.579328	0.00823655	-0.425093	-0.0874475	-0.16554	S	3	1741	___1	biological regulation;blood coagulation;cell migration;cell motility;cell surface receptor linked signaling pathway;cellular component movement;cellular defense response;cellular process;cellular response to stimulus;chemotaxis;coagulation;defense response;defense response to bacterium;establishment or maintenance of cell polarity;hemostasis;immune response;immune system process;leukocyte migrati…	molecular transducer activity;receptor activity;signal transducer activity;signaling receptor activity;transmembrane signaling receptor activity	basement membrane;cell part;cell projection;cell surface;external side of plasma membrane;extracellular matrix part;extracellular membrane-bounded organelle;extracellular organelle;extracellular region part;extracellular space;extracellular vesicular exosome;integral to membrane;integral to plasma membrane;intrinsic to membrane;intrinsic to plasma membrane;membrane;membrane part;membrane-bounded …	Cell adhesion molecules (CAMs)	14-3-3 domain binding motif;Calmodulin-dependent protein kinase II substrate motif;MAPKAPK1 kinase substrate motif;MAPKAPK2 kinase substrate motif;p70 Ribosomal S6 kinase substrate motif;Phosphorylase kinase substrate motif;PKA kinase substrate motif;PKC kinase substrate motif		1	2.69e-33	195.85	47404000000	29984000000	17420000000	355	51.4954
-2.54998	-1.00025	-0.713761	-0.999616	-2.27249	-0.374535	-1.47617	-0.781598	-1.08307	0.279657	-0.250269	-1.23455	-0.758531	-1.06231	-2.41503	-0.398027	-1.56876	-1.151	0.273001	-0.972158	-0.849929	-0.671956	-2.79449	-1.47099	-0.263352	-1.83294	-2.49004	-0.728211	-1.01985	-0.382117	-1.50606	-0.255336	S	2	1741	___1	biological regulation;blood coagulation;cell migration;cell motility;cell surface receptor linked signaling pathway;cellular component movement;cellular defense response;cellular process;cellular response to stimulus;chemotaxis;coagulation;defense response;defense response to bacterium;establishment or maintenance of cell polarity;hemostasis;immune response;immune system process;leukocyte migrati…	molecular transducer activity;receptor activity;signal transducer activity;signaling receptor activity;transmembrane signaling receptor activity	basement membrane;cell part;cell projection;cell surface;external side of plasma membrane;extracellular matrix part;extracellular membrane-bounded organelle;extracellular organelle;extracellular region part;extracellular space;extracellular vesicular exosome;integral to membrane;integral to plasma membrane;intrinsic to membrane;intrinsic to plasma membrane;membrane;membrane part;membrane-bounded …	Cell adhesion molecules (CAMs)			1	2.02e-06	134.75	15521000000	7873200000	7648200000	291	94.393
1.78751	1.45041	-1.06962	-0.0411562	1.82518	-0.346509	1.26095	2.05416	NaN	-0.495063	-0.218626	1.99247	-1.13671	-0.0437376	1.78174	-0.368243	1.23094	NaN	-0.526115	1.98936	1.45732	0.553209	0.145904	0.933364	1.34926	NaN	NaN	-1.09127	-0.0419894	-0.353523	1.34481	-0.223052	S	3	1750	___1	actin cytoskeleton organization;actin filament organization;actin filament-based process;activation of immune response;antigen receptor-mediated signaling pathway;axon guidance;biological regulation;cell activation;cell projection assembly;cell projection organization;cell surface receptor linked signaling pathway;cellular component assembly;cellular component assembly at cellular level;cellular …	binding;binding, bridging;cytoskeletal adaptor activity;cytoskeletal protein binding;enzyme inhibitor activity;enzyme regulator activity;eukaryotic initiation factor eIF2 binding;kinase inhibitor activity;kinase regulator activity;protein binding;protein binding, bridging;protein complex scaffold;protein kinase inhibitor activity;protein kinase regulator activity;receptor binding;receptor signali…	cell junction;cell part;cell-cell junction;cytoplasm;cytoplasmic part;cytosol;endoplasmic reticulum;intracellular membrane-bounded organelle;intracellular non-membrane-bounded organelle;intracellular organelle;intracellular part;macromolecular complex;membrane;membrane-bounded organelle;non-membrane-bounded organelle;nucleus;organelle;organelle membrane;organelle part;plasma membrane;protein comp…	ErbB signaling pathway;Pathogenic Escherichia coli infection;T cell receptor signaling pathway	14-3-3 domain binding motif;Calmodulin-dependent protein kinase II alpha substrate motif;Calmodulin-dependent protein kinase II substrate motif;Calmodulin-dependent protein kinase IV substrate motif;Casein kinase II substrate motif;Chk1 kinase substrate motif;DNA dependent Protein kinase substrate motif;G protein-coupled receptor kinase 1 substrate motif;GSK3 kinase substrate motif;Phosphorylase …	+	0.999353	5.27e-47	122.53	2951500000	2344900000	606510000	85	32.4112
1.47503	1.78318	2.30752	2.53715	0.822532	2.45593	1.53241	0.227033	8.02566	2.65385	1.98919	NaN	2.2526	2.47676	0.802955	2.39748	1.49594	7.83464	2.59069	1.72183	2.85131	1.64729	1.79229	1.91684	2.758	NaN	2.11046	2.46099	2.70589	2.61927	1.63433	2.12148	S	3	1752	___1	biological regulation;cellular component assembly;cellular component assembly at cellular level;cellular component organization;cellular component organization at cellular level;cellular component organization or biogenesis;cellular component organization or biogenesis at cellular level;cellular macromolecular complex assembly;cellular macromolecular complex subunit organization;cellular process;…	binding;chromatin binding;chromatin DNA binding;DNA binding;enzyme binding;histone deacetylase binding;nucleic acid binding;protein binding;structure-specific DNA binding	cell part;chromatin;chromosomal part;extracellular membrane-bounded organelle;extracellular organelle;extracellular region part;extracellular vesicular exosome;heterochromatin;intracellular organelle part;intracellular part;macromolecular complex;membrane-bounded organelle;membrane-bounded vesicle;nuclear chromatin;nuclear chromosome part;nuclear heterochromatin;nuclear part;nucleosome;organelle;…		Casein kinase II substrate motif;G protein-coupled receptor kinase 1 substrate motif		0.979432	2.93e-133	238.61	69194000000	42459000000	26735000000	2	16.7811
-1.33141	-2.5499	-1.8402	-2.09438	-0.954946	0.235039	-2.63106	-1.46316	-0.773847	-1.21433	-1.65617	-0.938949	-1.95562	-2.22575	-1.01484	0.229445	-2.79609	-0.822385	-1.2905	-1.93181	-1.89528	-1.67348	-3.84623	-3.10571	-1.01357	-2.75494	0.673935	-1.87745	-2.13678	0.250671	-2.68433	-1.6897	S	2	1752	___1	biological regulation;cellular component assembly;cellular component assembly at cellular level;cellular component organization;cellular component organization at cellular level;cellular component organization or biogenesis;cellular component organization or biogenesis at cellular level;cellular macromolecular complex assembly;cellular macromolecular complex subunit organization;cellular process;…	binding;chromatin binding;chromatin DNA binding;DNA binding;enzyme binding;histone deacetylase binding;nucleic acid binding;protein binding;structure-specific DNA binding	cell part;chromatin;chromosomal part;extracellular membrane-bounded organelle;extracellular organelle;extracellular region part;extracellular vesicular exosome;heterochromatin;intracellular organelle part;intracellular part;macromolecular complex;membrane-bounded organelle;membrane-bounded vesicle;nuclear chromatin;nuclear chromosome part;nuclear heterochromatin;nuclear part;nucleosome;organelle;…		Cdc2 kinase substrate motif;CDK kinase substrate motif;CDK1,2,4,6 kinase substrate motif;ERK1,2 kinase substrate motif;Growth associated histone HI kinase substrate motif;GSK-3, ERK1, ERK2, CDK5 substrate motif;WW domain binding motif		1	1.1e-152	238.61	579010000000	207310000000	371700000000	18	77.0542
3.71955	2.01647	3.09429	4.88092	2.63674	2.79903	2.34948	2.67525	4.94297	4.16394	2.59898	5.53694	3.02064	4.76475	2.57399	2.73241	2.29356	4.82532	4.06484	3.52178	4.10099	2.17823	0.857635	2.12586	2.76437	3.68179	1.72261	3.30008	5.20554	2.98518	2.50574	2.77183	S	2	1754	___1	cellular component assembly;cellular component assembly at cellular level;cellular component organization;cellular component organization at cellular level;cellular component organization or biogenesis;cellular component organization or biogenesis at cellular level;cellular macromolecular complex assembly;cellular macromolecular complex subunit organization;cellular process;chromatin assembly;chr…	binding;chromatin binding;chromatin DNA binding;DNA binding;nucleic acid binding;structure-specific DNA binding	cell part;chromatin;chromosomal part;euchromatin;intracellular membrane-bounded organelle;intracellular organelle;intracellular organelle part;intracellular part;macromolecular complex;membrane-bounded organelle;nuclear chromatin;nuclear chromosome part;nuclear euchromatin;nuclear part;nucleosome;nucleus;organelle;organelle part;protein-DNA complex		14-3-3 domain binding motif;Calmodulin-dependent protein kinase II substrate motif;PKA kinase substrate motif;PKC epsilon kinase substrate motif;PKC kinase substrate motif		1	6.61e-50	180.32	18479000000	17093000000	1386400000	36	72.2815
2.28988	2.26528	2.63347	4.23512	1.84	2.94033	2.1965	2.58955	NaN	3.30912	2.68166	NaN	2.57079	4.13432	1.7962	2.87035	2.14422	NaN	3.23036	3.12539	3.50437	2.86388	2.1322	2.28441	3.36066	NaN	2.38229	2.80861	4.51678	3.13589	2.34259	2.86001	S	2	1754	___1	cellular component assembly;cellular component assembly at cellular level;cellular component organization;cellular component organization at cellular level;cellular component organization or biogenesis;cellular component organization or biogenesis at cellular level;cellular macromolecular complex assembly;cellular macromolecular complex subunit organization;cellular process;chromatin assembly;chr…	binding;chromatin binding;chromatin DNA binding;DNA binding;nucleic acid binding;structure-specific DNA binding	cell part;chromatin;chromosomal part;euchromatin;intracellular membrane-bounded organelle;intracellular organelle;intracellular organelle part;intracellular part;macromolecular complex;membrane-bounded organelle;nuclear chromatin;nuclear chromosome part;nuclear euchromatin;nuclear part;nucleosome;nucleus;organelle;organelle part;protein-DNA complex		Casein kinase II substrate motif;G protein-coupled receptor kinase 1 substrate motif		0.842864	4.69e-25	105.5	8974700000	8366600000	608100000	2	7.29481
0.0220337	-0.831198	-2.37708	-2.46837	-0.652861	-3.31141	-1.56943	-0.694396	-2.40519	-3.52466	-2.21372	-0.209899	-2.52618	-2.62319	-0.69381	-3.51911	-1.66787	-2.55605	-3.74574	-1.18912	-0.140999	-1.04663	-2.38327	-1.25347	-0.807956	NaN	-1.06569	-2.4252	-2.51834	-3.37844	-1.6012	-2.25853	S	3	1763	___1	anatomical structure development;anatomical structure morphogenesis;axonogenesis;biological regulation;brain development;cell cycle process;cell part morphogenesis;cell projection morphogenesis;cell projection organization;cellular component disassembly;cellular component disassembly at cellular level;cellular component morphogenesis;cellular component organization;cellular component organization…	binding;cytoskeletal protein binding;molecular transducer activity;protein binding;signal transducer activity;tubulin binding	cell part;cell projection;cytoplasm;cytoplasmic part;cytoskeletal part;cytosol;extracellular membrane-bounded organelle;extracellular organelle;extracellular region part;extracellular vesicular exosome;intracellular;intracellular organelle part;intracellular part;macromolecular complex;membrane;membrane-bounded organelle;membrane-bounded vesicle;microtubule;neuron projection;organelle;organelle p…	MAPK signaling pathway	Calmodulin-dependent protein kinase II substrate motif;Chk1 kinase substrate motif;PAK2 kinase substrate motif;PKA kinase substrate motif;PKC kinase substrate motif	+	1	2.68e-15	132.79	3914300000	998940000	2915400000	16	76.4587
-0.327169	-2.29132	-3.27723	-2.53686	-0.904128	-2.81158	-1.85873	0.554926	-1.66577	-2.2482	-3.95564	NaN	-3.48279	-2.69597	-0.960838	-2.98793	-1.97532	-1.77026	-2.38921	0.0386889	-1.91644	-1.95568	-1.65591	-1.74874	-1.29586	NaN	-2.03691	-3.34358	-2.58821	-2.86849	-1.89636	-4.03572	S	3	1763	___1	anatomical structure development;anatomical structure morphogenesis;axonogenesis;biological regulation;brain development;cell cycle process;cell part morphogenesis;cell projection morphogenesis;cell projection organization;cellular component disassembly;cellular component disassembly at cellular level;cellular component morphogenesis;cellular component organization;cellular component organization…	binding;cytoskeletal protein binding;molecular transducer activity;protein binding;signal transducer activity;tubulin binding	cell part;cell projection;cytoplasm;cytoplasmic part;cytoskeletal part;cytosol;extracellular membrane-bounded organelle;extracellular organelle;extracellular region part;extracellular vesicular exosome;intracellular;intracellular organelle part;intracellular part;macromolecular complex;membrane;membrane-bounded organelle;membrane-bounded vesicle;microtubule;neuron projection;organelle;organelle p…	MAPK signaling pathway	Casein kinase II substrate motif;ERK1,2 kinase substrate motif;Growth associated histone HI kinase substrate motif;GSK-3, ERK1, ERK2, CDK5 substrate motif;PKA kinase substrate motif;PKC kinase substrate motif;WW domain binding motif	+	1	6.78e-18	150.91	4121000000	1242900000	2878100000	25	80.6661
-1.25252	-3.17179	-2.26825	-1.36397	-3.6696	-4.37085	-3.88643	-1.86547	-1.79789	-2.67254	-4.51655	-1.23303	-2.41053	-1.44952	-3.89977	-4.64501	-4.13019	-1.91066	-2.84017	NaN	-2.84635	-2.40717	-2.04861	-3.71023	-3.68482	NaN	-4.27759	-2.31417	-1.39158	-4.45934	-3.9651	-4.60798	S	3	1763	___1	anatomical structure development;anatomical structure morphogenesis;axonogenesis;biological regulation;brain development;cell cycle process;cell part morphogenesis;cell projection morphogenesis;cell projection organization;cellular component disassembly;cellular component disassembly at cellular level;cellular component morphogenesis;cellular component organization;cellular component organization…	binding;cytoskeletal protein binding;molecular transducer activity;protein binding;signal transducer activity;tubulin binding	cell part;cell projection;cytoplasm;cytoplasmic part;cytoskeletal part;cytosol;extracellular membrane-bounded organelle;extracellular organelle;extracellular region part;extracellular vesicular exosome;intracellular;intracellular organelle part;intracellular part;macromolecular complex;membrane;membrane-bounded organelle;membrane-bounded vesicle;microtubule;neuron projection;organelle;organelle p…	MAPK signaling pathway	Cdc2 kinase substrate motif;CDK kinase substrate motif;CDK1,2,4,6 kinase substrate motif;CDK4 kinase substrate motif;ERK1,2 kinase substrate motif;GSK-3, ERK1, ERK2, CDK5 substrate motif;WW domain binding motif		1	1.33e-12	124.62	2551000000	554710000	1996300000	38	82.0881
-0.336516	-2.10852	-0.994658	NaN	-0.235607	-2.99391	-1.12253	-1.07522	NaN	-1.72152	-2.30229	0.289197	-1.05705	NaN	-0.250385	-3.1817	-1.19294	NaN	-1.8295	-0.144285	0.395204	-1.39344	NaN	-1.88252	-1.65753	-2.88902	-0.785244	-1.01479	NaN	-3.05452	-1.14526	-2.3489	S	2	1763	___1	anatomical structure development;anatomical structure morphogenesis;axonogenesis;biological regulation;brain development;cell cycle process;cell part morphogenesis;cell projection morphogenesis;cell projection organization;cellular component disassembly;cellular component disassembly at cellular level;cellular component morphogenesis;cellular component organization;cellular component organization…	binding;cytoskeletal protein binding;molecular transducer activity;protein binding;signal transducer activity;tubulin binding	cell part;cell projection;cytoplasm;cytoplasmic part;cytoskeletal part;cytosol;extracellular membrane-bounded organelle;extracellular organelle;extracellular region part;extracellular vesicular exosome;intracellular;intracellular organelle part;intracellular part;macromolecular complex;membrane;membrane-bounded organelle;membrane-bounded vesicle;microtubule;neuron projection;organelle;organelle p…	MAPK signaling pathway	14-3-3 domain binding motif;Calmodulin-dependent protein kinase II substrate motif;Casein kinase II substrate motif;PAK2 kinase substrate motif;PKA kinase substrate motif;PKC epsilon kinase substrate motif;PKC kinase substrate motif		1	9.81e-24	172.1	14026000000	7670300000	6355800000	63	59.9076
1.27678	1.57684	0.442789	NaN	0.710746	NaN	0.523347	2.70455	NaN	-0.78923	0.0893147	NaN	0.43225	NaN	0.693829	NaN	0.510891	NaN	-0.838732	2.76242	1.54354	1.28066	3.5227	1.67828	1.1566	NaN	2.03091	0.472238	NaN	NaN	0.558153	0.0952547	S	2	1767	___1	anatomical structure morphogenesis;biological regulation;biosynthetic process;cellular biosynthetic process;cellular macromolecule biosynthetic process;cellular macromolecule metabolic process;cellular metabolic process;cellular nitrogen compound metabolic process;cellular process;developmental process;macromolecule biosynthetic process;macromolecule metabolic process;metabolic process;nitrogen c…	binding;cation binding;DNA binding;ion binding;metal ion binding;nucleic acid binding;transition metal ion binding;zinc ion binding	cell part;intracellular membrane-bounded organelle;intracellular organelle;intracellular organelle part;intracellular part;membrane-bounded organelle;nuclear part;nucleoplasm;nucleus;organelle;organelle part		AMP-activated protein kinase substrate motif;Casein kinase II substrate motif;MDC1 BRCT domain binding motif;Plk1 PBD domain binding motif	+	0.960084	0.00209113	83.948	324620000	262830000	61790000	42	15.6277
1.90537	2.45266	2.57743	2.43603	0.662529	1.87491	1.49589	2.16589	2.63234	2.34113	1.43933	3.69231	2.51608	2.37805	0.64676	1.83029	1.46028	2.56968	2.28541	2.57483	2.44181	1.91406	2.34514	2.00445	2.38306	3.83112	1.28876	2.74884	2.59804	1.99961	1.59537	1.53506	S	2	1767	___1	anatomical structure morphogenesis;biological regulation;biosynthetic process;cellular biosynthetic process;cellular macromolecule biosynthetic process;cellular macromolecule metabolic process;cellular metabolic process;cellular nitrogen compound metabolic process;cellular process;developmental process;macromolecule biosynthetic process;macromolecule metabolic process;metabolic process;nitrogen c…	binding;cation binding;DNA binding;ion binding;metal ion binding;nucleic acid binding;transition metal ion binding;zinc ion binding	cell part;intracellular membrane-bounded organelle;intracellular organelle;intracellular organelle part;intracellular part;membrane-bounded organelle;nuclear part;nucleoplasm;nucleus;organelle;organelle part		Casein kinase II substrate motif;PKA kinase substrate motif;PKC kinase substrate motif;Pyruvate dehydrogenase kinase substrate motif		1	1.86e-07	151.22	13748000000	12187000000	1560900000	49	111.241
-0.673083	-2.27096	-1.39042	NaN	-0.481761	-2.25314	-1.3902	-1.50483	-1.82588	0.0281028	NaN	NaN	-1.47763	NaN	-0.511978	-2.39447	-1.47739	-1.94041	0.0274339	-1.59499	-1.64508	-1.52245	-2.15593	-2.37635	-2.3216	NaN	-2.8759	-1.41857	NaN	-2.29876	-1.41834	NaN	S	4	1772	___1	aging;base-excision repair;biological regulation;biosynthetic process;cell aging;cellular biosynthetic process;cellular component assembly;cellular component assembly at cellular level;cellular component disassembly;cellular component disassembly at cellular level;cellular component organization;cellular component organization at cellular level;cellular component organization or biogenesis;cellul…	5'-deoxyribose-5-phosphate lyase activity;AT DNA binding;binding;carbon-oxygen lyase activity;catalytic activity;DNA binding;DNA-(apurinic or apyrimidinic site) lyase activity;enzyme binding;hormone receptor binding;ligand-dependent nuclear receptor transcription coactivator activity;lyase activity;nuclear hormone receptor binding;nucleic acid binding;peroxisome proliferator activated receptor bi…	adherens junction;anchoring junction;cell junction;cell part;cell-substrate adherens junction;cell-substrate junction;chromatin;chromosomal part;cytoplasmic part;cytosol;focal adhesion;heterochromatin;intracellular membrane-bounded organelle;intracellular organelle;intracellular organelle part;intracellular part;macromolecular complex;membrane-bounded organelle;nuclear part;nucleoplasm;nucleoplas…		ATM kinase substrate motif;Casein kinase II substrate motif;DNA dependent Protein kinase substrate motif;G protein-coupled receptor kinase 1 substrate motif;PKA kinase substrate motif;PKC kinase substrate motif		0.999714	1.32e-56	137.29	1817900000	698100000	1119800000	44	35.9626
NaN	-0.87248	-1.31383	-0.312441	NaN	-0.832582	-1.6434	-1.43626	NaN	-0.510423	NaN	-0.928153	-1.39624	-0.332038	NaN	-0.884804	-1.74648	NaN	-0.542438	-1.37277	NaN	NaN	0.301283	-1.6072	-2.62255	NaN	-1.24026	-1.34043	-0.318766	-0.849437	-1.67667	NaN	S	2	1787	___1	activation of immune response;activation of innate immune response;aging;anatomical structure development;anatomical structure formation involved in morphogenesis;anatomical structure morphogenesis;angiogenesis;apoptotic mitochondrial changes;axon regeneration;axonogenesis;behavior;biological regulation;cell activation;cell communication;cell development;cell differentiation;cell part morphogenes…	activating transcription factor binding;binding;cAMP response element binding;core promoter proximal region DNA binding;core promoter proximal region sequence-specific DNA binding;DNA binding;double-stranded DNA binding;enhancer binding;enhancer sequence-specific DNA binding;enzyme activator activity;enzyme binding;enzyme regulator activity;GTPase activator activity;GTPase regulator activity;nucl…	cell part;chromatin;chromosomal part;chromosome;cytoplasmic part;cytosol;euchromatin;intracellular membrane-bounded organelle;intracellular non-membrane-bounded organelle;intracellular organelle;intracellular organelle part;intracellular part;macromolecular complex;membrane-bounded organelle;non-membrane-bounded organelle;nuclear chromatin;nuclear chromosome;nuclear chromosome part;nuclear euchro…	B cell receptor signaling pathway;Chagas disease (American trypanosomiasis);Colorectal cancer;Epithelial cell signaling in Helicobacter pylori infection;ErbB signaling pathway;Focal adhesion;GnRH signaling pathway;Leishmaniasis;MAPK signaling pathway;Neurotrophin signaling pathway;Osteoclast differentiation;Pathways in cancer;Renal cell carcinoma;Rheumatoid arthritis;T cell receptor signaling pat…	Calmodulin-dependent protein kinase II substrate motif;Casein kinase II substrate motif;Chk1 kinase substrate motif;ERK1,2 kinase substrate motif;GSK-3, ERK1, ERK2, CDK5 substrate motif;PKA kinase substrate motif;PKC kinase substrate motif;WW domain binding motif		1	0.00029562	97.813	210690000	78209000	132480000	100	49.3004
-2.04114	-2.74638	-2.18956	NaN	-2.16337	-1.02352	-1.90837	-2.74183	NaN	-2.01923	-2.38588	NaN	-2.32689	NaN	-2.29906	-1.08772	-2.02807	NaN	-2.14588	NaN	-2.60873	-2.07219	-3.25199	-3.34924	-1.29413	NaN	-3.3299	-2.23388	NaN	-1.04424	-1.94701	-2.43418	S	3	1797	___1	B cell activation;B cell differentiation;biological regulation;carbohydrate homeostasis;cell activation;cell differentiation;cell surface receptor linked signaling pathway;cellular developmental process;cellular macromolecule metabolic process;cellular metabolic process;cellular process;cellular protein metabolic process;cellular response to chemical stimulus;cellular response to cytokine stimulu…	binding;catalytic activity;enzyme binding;hydrolase activity;hydrolase activity, acting on ester bonds;integrin binding;kinase binding;phosphatase activity;phosphoprotein phosphatase activity;phosphoric ester hydrolase activity;protein binding;protein complex binding;protein kinase binding;protein tyrosine phosphatase activity;receptor binding;receptor tyrosine kinase binding;SNARE binding;syntax…	cell part;cytoplasmic part;endoplasmic reticulum;endoplasmic reticulum-Golgi intermediate compartment;intracellular membrane-bounded organelle;intracellular organelle;intracellular organelle part;intracellular part;membrane;membrane-bounded organelle;nuclear part;nucleoplasm;nucleus;organelle;organelle part;plasma membrane		Cdc2 kinase substrate motif;CDK kinase substrate motif;CDK1,2,4,6 kinase substrate motif;ERK1,2 kinase substrate motif;GSK-3, ERK1, ERK2, CDK5 substrate motif;WW domain binding motif		1	2.32e-43	150.63	663260000	183700000	479570000	304	77.084
-1.21534	-1.84322	-0.784684	-2.42848	-0.962306	-2.97505	-1.72116	NaN	0.658662	-2.45749	-2.92104	-1.77761	-0.833902	-2.5808	-1.02267	-3.16166	-1.82912	0.642985	-2.61163	-2.16254	-2.19119	-1.98208	-2.26666	NaN	-2.12863	-4.15202	-2.15657	-0.800569	-2.47764	-3.03528	-1.756	-2.98017	S	2	1798	___1	amine metabolic process;B cell activation;B cell proliferation;biosynthetic process;carboxylic acid metabolic process;cell activation;cell proliferation;cellular amine metabolic process;cellular amino acid metabolic process;cellular biosynthetic process;cellular ketone metabolic process;cellular metabolic process;cellular nitrogen compound biosynthetic process;cellular nitrogen compound metabolic…	adenyl nucleotide binding;adenyl ribonucleotide binding;ATP binding;binding;catalytic activity;CTP synthase activity;ligase activity;ligase activity, forming carbon-nitrogen bonds;nucleotide binding;purine nucleotide binding;purine ribonucleoside triphosphate binding;purine ribonucleotide binding;ribonucleotide binding	cell part;cytoplasmic part;cytosol;intracellular part;membrane	Pyrimidine metabolism	Casein kinase II substrate motif;ERK1,2 kinase substrate motif;G protein-coupled receptor kinase 1 substrate motif;Growth associated histone HI kinase substrate motif;GSK-3, ERK1, ERK2, CDK5 substrate motif;PKA kinase substrate motif;PKC kinase substrate motif;Pyruvate dehydrogenase kinase substrate motif;WW domain binding motif		1	0.00352441	90.906	4495900000	1358500000	3137300000	562	76.0998
-1.1813	-1.31188	NaN	-0.991778	-0.884404	-0.944684	-1.49701	NaN	NaN	-1.97894	-1.16175	-1.35689	NaN	-1.05398	-0.939877	-1.00394	-1.59091	NaN	-2.10306	NaN	NaN	-0.685401	-1.26966	-1.49428	NaN	NaN	NaN	NaN	-1.01186	-0.963809	-1.52732	-1.18527	S	2	1800	___1	biological regulation;biosynthetic process;cell growth;cellular biosynthetic process;cellular macromolecule biosynthetic process;cellular macromolecule metabolic process;cellular metabolic process;cellular nitrogen compound metabolic process;cellular process;cellular response to stimulus;chordate embryonic development;circadian rhythm;developmental process;embryo development;embryo development en…	adenyl nucleotide binding;adenyl ribonucleotide binding;androgen receptor binding;ATP binding;ATPase activity;ATPase activity, coupled;ATP-dependent helicase activity;ATP-dependent RNA helicase activity;binding;catalytic activity;estrogen receptor binding;helicase activity;hormone receptor binding;hydrolase activity;hydrolase activity, acting on acid anhydrides;hydrolase activity, acting on acid …	catalytic step 2 spliceosome;cell part;cytoplasm;extracellular membrane-bounded organelle;extracellular organelle;extracellular region part;extracellular vesicular exosome;intracellular membrane-bounded organelle;intracellular non-membrane-bounded organelle;intracellular organelle;intracellular organelle part;intracellular part;macromolecular complex;membrane;membrane-bounded organelle;membrane-b…	Spliceosome	Casein kinase II substrate motif;MAPKAPK2 kinase substrate motif;MDC1 BRCT domain binding motif;PKA kinase substrate motif;PKC kinase substrate motif;Plk1 PBD domain binding motif;Pyruvate dehydrogenase kinase substrate motif		0.995439	0.000263432	81.525	917110000	358730000	558380000	6	23.3923
0.485109	-1.18977	-1.27636	-0.913344	1.00049	-0.737059	-0.434546	0.28194	-0.363368	-0.293087	-2.2852	0.20032	-1.35642	-0.970632	0.97668	-0.78329	-0.461802	-0.38616	-0.31147	0.0860199	-1.06387	-1.68155	-1.28958	-0.843046	-0.565664	NaN	-1.25605	-1.3022	-0.931834	-0.75198	-0.443343	-2.33146	S	2	1801	___1	alcohol catabolic process;alcohol metabolic process;biological regulation;carbohydrate catabolic process;carbohydrate metabolic process;carbohydrate phosphorylation;catabolic process;cellular carbohydrate catabolic process;cellular carbohydrate metabolic process;cellular component assembly;cellular component organization;cellular component organization or biogenesis;cellular metabolic process;cel…	6-phosphofructokinase activity;adenyl nucleotide binding;adenyl ribonucleotide binding;ATP binding;binding;carbohydrate binding;carbohydrate kinase activity;catalytic activity;cation binding;enzyme binding;fructose binding;fructose-6-phosphate binding;identical protein binding;ion binding;kinase activity;kinase binding;metal ion binding;monosaccharide binding;nucleotide binding;phosphofructokinas…	6-phosphofructokinase complex;cell part;cytoplasmic part;cytosol;cytosolic part;extracellular membrane-bounded organelle;extracellular organelle;extracellular region part;extracellular vesicular exosome;intracellular part;macromolecular complex;membrane;membrane-bounded organelle;membrane-bounded vesicle;organelle;protein complex;vesicle	Fructose and mannose metabolism;Galactose metabolism;Glycolysis / Gluconeogenesis;Methane metabolism;Pentose phosphate pathway	14-3-3 domain binding motif;Calmodulin-dependent protein kinase II substrate motif;PKA kinase substrate motif;PKC kinase substrate motif;ZIP kinase substrate motif		0.999996	3.34e-05	109.16	2629500000	1512700000	1116800000	775	54.1205
1.45064	0.658466	-0.237428	1.69101	0.0494804	1.6357	0.789117	0.491106	1.44683	2.26494	0.4793	0.993771	-0.25232	1.65076	0.0483027	1.59677	0.770335	1.41239	2.21103	0.195033	0.602057	0.465745	0.737282	0.764656	0.270499	NaN	-0.802225	-0.242235	1.80347	1.74449	0.841599	0.511177	S	2	1822;1823	___1	biological regulation;cellular component organization;cellular component organization at cellular level;cellular component organization or biogenesis;cellular component organization or biogenesis at cellular level;cellular macromolecule metabolic process;cellular metabolic process;cellular nitrogen compound metabolic process;cellular process;cytokinesis;cytoskeleton organization;macromolecule met…	binding;DNA binding;nucleic acid binding;RNA binding	cell part;intracellular organelle part;intracellular part;nuclear body;nuclear part;nuclear speck;nucleoplasm;nucleoplasm part;organelle part		14-3-3 domain binding motif;Calmodulin-dependent protein kinase II substrate motif;Casein kinase II substrate motif;MAPKAPK1 kinase substrate motif;MAPKAPK2 kinase substrate motif;p70 Ribosomal S6 kinase substrate motif;Phosphorylase kinase substrate motif;PKA kinase substrate motif;PKC kinase substrate motif		1	9.71e-89	224.4	2392700000	1793400000	599340000	94	71.9693
-0.638246	-0.615542	-0.317907	-0.648021	-0.936533	-0.0590808	-1.13396	-0.895425	-0.580041	-0.122377	NaN	-0.693197	-0.337847	-0.688667	-0.995276	-0.0627865	-1.20508	-0.616423	-0.130053	-0.803822	NaN	-0.270747	NaN	-0.572692	-0.358439	NaN	-0.730102	-0.324343	-0.66114	-0.0602768	-1.15692	NaN	S	2	1822;1823	___1	biological regulation;cellular component organization;cellular component organization at cellular level;cellular component organization or biogenesis;cellular component organization or biogenesis at cellular level;cellular macromolecule metabolic process;cellular metabolic process;cellular nitrogen compound metabolic process;cellular process;cytokinesis;cytoskeleton organization;macromolecule met…	binding;DNA binding;nucleic acid binding;RNA binding	cell part;intracellular organelle part;intracellular part;nuclear body;nuclear part;nuclear speck;nucleoplasm;nucleoplasm part;organelle part		Casein kinase I substrate motif;Casein kinase II substrate motif;ERK1,2 kinase substrate motif;G protein-coupled receptor kinase 1 substrate motif;GSK3 kinase substrate motif;GSK-3, ERK1, ERK2, CDK5 substrate motif;WW domain binding motif		0.976968	7.84e-06	105.19	485030000	261170000	223860000	283	18.8788
0.488497	-0.0715677	-0.743882	-1.91824	0.391173	0.202184	0.161018	0.518456	-1.14364	-0.146938	-0.637954	0.0927737	-0.79054	-2.03856	0.381862	0.197372	0.157185	-1.21537	-0.156154	1.26134	0.00750627	-0.615201	0.343111	0.349033	0.557082	NaN	0.614614	-0.758941	-1.95708	0.215631	0.171727	-0.650869	S	2	1824	___1	biological regulation;biosynthetic process;cellular biosynthetic process;cellular macromolecule biosynthetic process;cellular macromolecule metabolic process;cellular metabolic process;cellular nitrogen compound metabolic process;cellular process;gene expression;macromolecule biosynthetic process;macromolecule metabolic process;metabolic process;negative regulation of biological process;negative …	binding;nucleic acid binding;nucleotide binding;RNA binding	cell part;cytoplasmic part;intracellular membrane-bounded organelle;intracellular organelle;intracellular organelle part;intracellular part;macromolecular complex;membrane-bounded organelle;mitochondrion;NELF complex;nuclear part;nucleoplasm;nucleoplasm part;nucleus;organelle;organelle part;protein complex;transcription elongation factor complex		14-3-3 domain binding motif;b-Adrenergic Receptor kinase substrate motif;Calmodulin-dependent protein kinase II alpha substrate motif;Calmodulin-dependent protein kinase II substrate motif;Calmodulin-dependent protein kinase IV substrate motif;Casein kinase II substrate motif;Doublecortin kinase-1 kinase substrate motif;PKA kinase substrate motif;PKC kinase substrate motif;ZIP kinase substrate mo…		0.999994	0.00044008	118.41	1040100000	654340000	385800000	251	51.8625
-0.138998	-0.231481	-0.364046	NaN	-0.447508	-0.0136868	-0.197859	0.00921487	-1.05335	-0.35189	-0.382014	-0.267036	-0.38688	NaN	-0.475577	-0.0145453	-0.210269	-1.11942	-0.373961	-0.205675	-0.185141	-0.340252	-0.300778	-0.667308	0.193158	NaN	-0.13307	-0.371415	NaN	-0.0139639	-0.201864	-0.389748	S	2	1824	___1	biological regulation;biosynthetic process;cellular biosynthetic process;cellular macromolecule biosynthetic process;cellular macromolecule metabolic process;cellular metabolic process;cellular nitrogen compound metabolic process;cellular process;gene expression;macromolecule biosynthetic process;macromolecule metabolic process;metabolic process;negative regulation of biological process;negative …	binding;nucleic acid binding;nucleotide binding;RNA binding	cell part;cytoplasmic part;intracellular membrane-bounded organelle;intracellular organelle;intracellular organelle part;intracellular part;macromolecular complex;membrane-bounded organelle;mitochondrion;NELF complex;nuclear part;nucleoplasm;nucleoplasm part;nucleus;organelle;organelle part;protein complex;transcription elongation factor complex		14-3-3 domain binding motif;Calmodulin-dependent protein kinase II substrate motif;Calmodulin-dependent protein kinase IV substrate motif;Casein kinase II substrate motif;PKA kinase substrate motif;PKC kinase substrate motif;Pyruvate dehydrogenase kinase substrate motif		0.999961	1.3e-69	197.47	3549000000	2160000000	1389000000	115	44.0829
0.119088	-0.417811	-0.65086	-1.67477	-0.113126	0.142773	-0.157788	-0.071387	-1.08705	-0.0148864	-0.706267	0.366548	-0.691684	-1.77982	-0.120221	0.139375	-0.167685	-1.15523	-0.0158201	0.273858	-0.675741	-0.796901	0.119205	-0.145721	0.265928	NaN	0.0567053	-0.664036	-1.70868	0.152268	-0.160982	-0.720565	S	2	1824	___1	biological regulation;biosynthetic process;cellular biosynthetic process;cellular macromolecule biosynthetic process;cellular macromolecule metabolic process;cellular metabolic process;cellular nitrogen compound metabolic process;cellular process;gene expression;macromolecule biosynthetic process;macromolecule metabolic process;metabolic process;negative regulation of biological process;negative …	binding;nucleic acid binding;nucleotide binding;RNA binding	cell part;cytoplasmic part;intracellular membrane-bounded organelle;intracellular organelle;intracellular organelle part;intracellular part;macromolecular complex;membrane-bounded organelle;mitochondrion;NELF complex;nuclear part;nucleoplasm;nucleoplasm part;nucleus;organelle;organelle part;protein complex;transcription elongation factor complex		14-3-3 domain binding motif;AMP-activated protein kinase substrate motif;Calmodulin-dependent protein kinase I substrate motif;Calmodulin-dependent protein kinase II substrate motif;Calmodulin-dependent protein kinase IV substrate motif;Chk1 kinase substrate motif;G protein-coupled receptor kinase 1 substrate motif;PKA kinase substrate motif;PKC kinase substrate motif		0.999457	7.05e-63	165.38	3808300000	2320400000	1487900000	51	32.6531
-0.0856872	-0.829617	-1.6512	-0.242562	0.767848	-0.528998	-0.673257	-0.592945	-1.0133	-0.247137	-1.24239	NaN	-1.75477	-0.257776	0.749572	-0.562178	-0.715486	-1.07685	-0.262638	-0.613425	0.237104	-1.6254	NaN	-0.584707	-0.570889	NaN	NaN	-1.68462	-0.247473	-0.539707	-0.686887	-1.26754	S	2	1827	___1	alcohol biosynthetic process;alcohol catabolic process;alcohol metabolic process;biological regulation;biosynthetic process;carbohydrate biosynthetic process;carbohydrate catabolic process;carbohydrate metabolic process;catabolic process;cellular biosynthetic process;cellular carbohydrate biosynthetic process;cellular carbohydrate catabolic process;cellular carbohydrate metabolic process;cellular…	binding;bisphosphoglycerate 2-phosphatase activity;bisphosphoglycerate mutase activity;bisphosphoglycerate phosphatase activity;catalytic activity;enzyme binding;hydrolase activity;hydrolase activity, acting on ester bonds;intramolecular transferase activity;intramolecular transferase activity, phosphotransferases;isomerase activity;kinase binding;phosphatase activity;phosphoglycerate mutase acti…	cell part;cytoplasm;cytoplasmic part;cytosol;extracellular membrane-bounded organelle;extracellular organelle;extracellular region part;extracellular vesicular exosome;intracellular part;membrane;membrane-bounded organelle;membrane-bounded vesicle;organelle;vesicle	Glycolysis / Gluconeogenesis;Methane metabolism	AMP-activated protein kinase substrate motif;b-Adrenergic Receptor kinase substrate motif		1	3.17e-29	165.64	510980000	329590000	181390000	14	64.1035
-0.1034	-0.376791	0.402691	0.174546	-0.527891	-0.223352	0.00515824	-0.333581	0.0212388	0.133093	0.0044523	-0.388383	0.393107	0.170392	-0.561002	-0.237361	0.00503546	0.0207333	0.129926	-0.133088	-0.17901	-0.328733	0.107254	0.0891979	-0.186727	0.162558	0.365233	0.429473	0.186155	-0.227873	0.0055013	0.00474841	S	2	1828	___1	biological regulation;cell cycle phase;cell cycle process;cell division;cellular component assembly;cellular component assembly at cellular level;cellular component organization;cellular component organization at cellular level;cellular component organization or biogenesis;cellular component organization or biogenesis at cellular level;cellular process;chromosome segregation;cytoskeleton organiza…	binding;chromatin binding;chromatin DNA binding;DNA binding;enzyme regulator activity;GTPase regulator activity;guanyl-nucleotide exchange factor activity;histone binding;nucleic acid binding;nucleoside-triphosphatase regulator activity;nucleosomal DNA binding;nucleosome binding;protein binding;Ran guanyl-nucleotide exchange factor activity;Ras guanyl-nucleotide exchange factor activity;small GTP…	cell part;chromatin;chromosomal part;chromosome;condensed chromosome;condensed nuclear chromosome;cytoplasm;intracellular membrane-bounded organelle;intracellular non-membrane-bounded organelle;intracellular organelle;intracellular organelle part;intracellular part;membrane;membrane-bounded organelle;non-membrane-bounded organelle;nuclear chromatin;nuclear chromosome;nuclear chromosome part;nucle…		Calmodulin-dependent protein kinase II substrate motif;Chk1 kinase substrate motif;ERK1,2 kinase substrate motif;Growth associated histone HI kinase substrate motif;GSK-3, ERK1, ERK2, CDK5 substrate motif;PAK2 kinase substrate motif;PKA kinase substrate motif;PKC kinase substrate motif;WW domain binding motif		1	4.07e-06	113.52	14470000000	8905900000	5564200000	11	43.8967
-0.562422	-1.48872	NaN	NaN	0.693359	-1.96583	0.249336	-2.29326	NaN	-2.14764	-0.267124	2.56798	NaN	NaN	0.676856	-2.08913	0.243401	NaN	-2.28235	-2.82115	NaN	-0.524893	NaN	NaN	-1.93931	NaN	NaN	NaN	NaN	-2.00563	0.265918	-0.272532	S	2	1830	___1	anatomical structure homeostasis;anatomical structure morphogenesis;base-excision repair;biological regulation;biosynthetic process;cell cycle;cell division;cellular biosynthetic process;cellular component organization;cellular component organization at cellular level;cellular component organization or biogenesis;cellular component organization or biogenesis at cellular level;cellular macromolecu…	adenyl nucleotide binding;adenyl ribonucleotide binding;ATP binding;binding;catalytic activity;cation binding;DNA binding;DNA ligase (ATP) activity;DNA ligase activity;ion binding;ligase activity;ligase activity, forming phosphoric ester bonds;metal ion binding;nucleic acid binding;nucleotide binding;purine nucleotide binding;purine ribonucleoside triphosphate binding;purine ribonucleotide bindin…	cell part;cytoplasmic part;Golgi apparatus;intracellular membrane-bounded organelle;intracellular organelle;intracellular organelle part;intracellular part;membrane-bounded organelle;mitochondrion;nuclear part;nucleoplasm;nucleus;organelle;organelle part	Base excision repair;DNA replication;Mismatch repair;Nucleotide excision repair	Casein kinase II substrate motif;G protein-coupled receptor kinase 1 substrate motif		1	1.07e-168	262.05	4819900000	717930000	4102000000	66	86.916
1.71446	3.0019	-0.88338	NaN	1.99622	1.13212	1.93956	1.36608	2.0208	1.16516	NaN	2.48835	-0.938789	NaN	1.94871	1.10517	1.89339	1.9727	1.13743	NaN	1.04643	NaN	0.0539208	1.11148	0.790841	NaN	NaN	-0.901264	NaN	1.20741	2.06855	NaN	S	3	1836;2000	___1	axon guidance;biological adhesion;biological regulation;cell adhesion;cell surface receptor linked signaling pathway;cell-cell adhesion;cellular process;cellular response to stimulus;chemotaxis;enzyme linked receptor protein signaling pathway;ephrin receptor signaling pathway;establishment of localization;establishment of localization in cell;establishment of protein localization;establishment of…	binding;calcium ion binding;cation binding;ion binding;metal ion binding;structural constituent of muscle;structural molecule activity	actin filament bundle;actomyosin;apical part of cell;cell part;contractile fiber part;cytoplasmic part;cytoskeletal part;cytosol;extracellular membrane-bounded organelle;extracellular organelle;extracellular region part;extracellular vesicular exosome;intracellular organelle part;intracellular part;macromolecular complex;membrane-bounded organelle;membrane-bounded vesicle;muscle myosin complex;my…	Focal adhesion;Leukocyte transendothelial migration;Regulation of actin cytoskeleton;Tight junction;Vascular smooth muscle contraction	14-3-3 domain binding motif;Calmodulin-dependent protein kinase II substrate motif;G protein-coupled receptor kinase 1 substrate motif;PKA kinase substrate motif;PKC kinase substrate motif		1	4.57e-88	187.43	5690200000	4629800000	1060400000	19	90.1843
-1.29445	-0.696844	-0.394497	-1.00384	-1.38342	-0.713233	NaN	-1.06879	NaN	-0.787617	-0.760182	NaN	-0.419241	-1.06681	-1.47019	-0.757969	NaN	NaN	-0.837019	-0.893625	NaN	-0.177919	-1.08662	-1.04891	-0.264915	NaN	-1.33	-0.402483	-1.02416	-0.727672	NaN	-0.775571	S	3	1840	___1	anatomical structure formation involved in morphogenesis;angiogenesis;developmental process	binding;DNA binding;identical protein binding;nucleic acid binding;nucleotide binding;protein binding;protein C-terminus binding;RNA binding;sequence-specific DNA binding;telomeric DNA binding	cell cortex;cell part;cytoplasmic part;extracellular membrane-bounded organelle;extracellular organelle;extracellular region part;extracellular vesicular exosome;intracellular membrane-bounded organelle;intracellular non-membrane-bounded organelle;intracellular organelle;intracellular organelle part;intracellular part;macromolecular complex;membrane;membrane-bounded organelle;membrane-bounded ves…	Pathogenic Escherichia coli infection	ERK1,2 kinase substrate motif;GSK-3, ERK1, ERK2, CDK5 substrate motif;PKA kinase substrate motif;PKC kinase substrate motif;WW domain binding motif		1	2.97e-20	109.1	7785900000	3988500000	3797400000	563	104.549
-3.19117	-3.63341	-1.62607	-2.35138	0.401668	-1.8115	-3.71241	-2.5877	-3.17582	-2.18931	-2.72396	-3.1819	-1.72806	-2.49887	0.392108	-1.92512	-3.94526	-3.37502	-2.32663	-3.15197	-2.89039	-1.80068	-3.18818	-3.73915	-2.08272	-3.78455	-4.28849	-1.65899	-2.39898	-1.84817	-3.78756	-2.77911	S	2	1840	___1	anatomical structure formation involved in morphogenesis;angiogenesis;developmental process	binding;DNA binding;identical protein binding;nucleic acid binding;nucleotide binding;protein binding;protein C-terminus binding;RNA binding;sequence-specific DNA binding;telomeric DNA binding	cell cortex;cell part;cytoplasmic part;extracellular membrane-bounded organelle;extracellular organelle;extracellular region part;extracellular vesicular exosome;intracellular membrane-bounded organelle;intracellular non-membrane-bounded organelle;intracellular organelle;intracellular organelle part;intracellular part;macromolecular complex;membrane;membrane-bounded organelle;membrane-bounded ves…	Pathogenic Escherichia coli infection	Casein kinase II substrate motif;Cdc2 kinase substrate motif;CDK kinase substrate motif;CDK1,2,4,6 kinase substrate motif;ERK1,2 kinase substrate motif;GSK-3, ERK1, ERK2, CDK5 substrate motif;PKA kinase substrate motif;WW domain binding motif		0.999319	3.68e-17	178.52	35968000000	7564500000	28404000000	67	31.6639
-0.128937	NaN	-1.10081	0.379009	1.22421	-0.0530238	1.33516	-0.302898	NaN	0.452699	0.807421	NaN	-1.16986	0.369988	1.19507	-0.0563496	1.30338	NaN	0.441924	-0.707876	0.0688256	-2.4032	NaN	NaN	NaN	NaN	-1.01078	-1.1231	0.404216	-0.0540972	1.42396	0.861121	S	2	1849	___1	anatomical structure development;autophagy;biological regulation;catabolic process;cellular catabolic process;cellular component organization;cellular component organization at cellular level;cellular component organization or biogenesis;cellular component organization or biogenesis at cellular level;cellular metabolic process;cellular process;developmental process;embryonic organ development;emb…	binding;core promoter proximal region DNA binding;core promoter proximal region sequence-specific DNA binding;DNA binding;nucleic acid binding;nucleic acid binding transcription factor activity;regulatory region DNA binding;regulatory region nucleic acid binding;RNA polymerase II core promoter proximal region sequence-specific DNA binding;RNA polymerase II core promoter proximal region sequence-s…	cell part;cytoplasm;intracellular membrane-bounded organelle;intracellular organelle;intracellular part;membrane-bounded organelle;nucleus;organelle		14-3-3 domain binding motif;Calmodulin-dependent protein kinase II substrate motif;Casein kinase II substrate motif;MAPKAPK2 kinase substrate motif;MDC1 BRCT domain binding motif;PAK2 kinase substrate motif;PKA kinase substrate motif;PKC epsilon kinase substrate motif;PKC kinase substrate motif;Plk1 PBD domain binding motif		0.909597	1.3e-16	149	420530000	298050000	122470000	467	10.0985
-0.321347	0.747206	-0.133454	NaN	NaN	-0.240829	NaN	-0.760758	1.1128	0.481459	-0.185148	NaN	-0.141825	NaN	NaN	-0.255935	NaN	1.08631	0.47	NaN	0.0605016	-0.507496	-0.406201	-0.805815	NaN	NaN	NaN	-0.136156	NaN	-0.245704	NaN	-0.188896	S	2	1853	___1	amine metabolic process;aminoglycan catabolic process;aminoglycan metabolic process;biological regulation;calcium-mediated signaling;carbohydrate catabolic process;carbohydrate metabolic process;cardiac cell differentiation;cardiac muscle cell differentiation;catabolic process;cation homeostasis;cation transport;cell death;cell differentiation;cell growth;cell migration;cell motility;cellular cat…	active transmembrane transporter activity;antiporter activity;binding;binding, bridging;calcium-dependent protein binding;cation transmembrane transporter activity;cation:cation antiporter activity;enzyme binding;hydrogen ion transmembrane transporter activity;inorganic cation transmembrane transporter activity;ion transmembrane transporter activity;lipid binding;metal ion transmembrane transport…	adherens junction;anchoring junction;apical plasma membrane;basolateral plasma membrane;cell junction;cell part;cell projection;cell surface;cell-cell contact zone;cell-cell junction;cell-substrate adherens junction;cell-substrate junction;cytoplasm;cytoplasmic part;endoplasmic reticulum;endoplasmic reticulum membrane;endoplasmic reticulum part;extracellular membrane-bounded organelle;extracellul…	Bile secretion;Cardiac muscle contraction;Gastric acid secretion;Pancreatic secretion;Regulation of actin cytoskeleton;Salivary secretion	14-3-3 domain binding motif;Akt kinase substrate motif;Calmodulin-dependent protein kinase II substrate motif;G protein-coupled receptor kinase 1 substrate motif;MAPKAPK1 kinase substrate motif;PKA kinase substrate motif;PKC kinase substrate motif		1	7.13e-15	134.88	678460000	408480000	269990000	703	88.8694
0.237726	-0.51014	-0.796945	0.199235	0.47917	0.461995	0.0893039	-0.112224	NaN	0.959162	0.121957	NaN	-0.846932	0.194493	0.467765	0.450999	0.0871783	NaN	0.936332	-0.462788	NaN	-1.2657	-1.93589	-0.751234	-0.341251	NaN	-1.03674	-0.813079	0.212485	0.492721	0.0952432	0.130068	S	3	1860	___1	biological regulation;blood coagulation;cellular process;coagulation;establishment of localization;hemostasis;ion transmembrane transport;ion transport;multicellular organismal process;regulation of biological quality;regulation of body fluid levels;transmembrane transport;transport	active transmembrane transporter activity;adenyl nucleotide binding;adenyl ribonucleotide binding;ATP binding;ATPase activity;ATPase activity, coupled;ATPase activity, coupled to movement of substances;ATPase activity, coupled to transmembrane movement of ions;ATPase activity, coupled to transmembrane movement of ions, phosphorylative mechanism;ATPase activity, coupled to transmembrane movement o…	cell part;extracellular membrane-bounded organelle;extracellular organelle;extracellular region part;extracellular vesicular exosome;integral to membrane;integral to plasma membrane;intracellular membrane-bounded organelle;intracellular organelle;intracellular part;intrinsic to membrane;intrinsic to plasma membrane;membrane;membrane part;membrane-bounded organelle;membrane-bounded vesicle;nucleus…	Calcium signaling pathway;Pancreatic secretion;Salivary secretion	MDC1 BRCT domain binding motif;PKA kinase substrate motif;PKC kinase substrate motif;Plk1 PBD domain binding motif	+	0.804445	1.85e-11	108.14	2058100000	1335000000	723120000	1104	6.14226
-1.09819	-0.791657	-0.689694	-0.966717	-0.156124	-1.01042	-0.772509	-1.19866	-0.535134	-0.567474	-0.65987	-0.903436	-0.732953	-1.02735	-0.165916	-1.0738	-0.820963	-0.5687	-0.603068	-1.66629	-0.930496	-0.894132	-1.35589	-1.42782	-1.31218	NaN	-1.24983	-0.703656	-0.986287	-1.03088	-0.788148	-0.673229	S	2	1862	___1	anatomical structure development;biosynthetic process;cell proliferation;cellular biosynthetic process;cellular macromolecule biosynthetic process;cellular macromolecule metabolic process;cellular metabolic process;cellular process;cellular process involved in reproduction;cellular protein metabolic process;chordate embryonic development;developmental process;developmental process involved in rep…	binding;cation binding;ion binding;metal ion binding;nucleic acid binding;RNA binding;translation factor activity, nucleic acid binding;translation initiation factor activity	cell part;cytoplasm;cytoplasmic part;cytosol;eukaryotic translation initiation factor 2 complex;intracellular part;macromolecular complex;protein complex	RNA transport	Casein kinase II substrate motif	+	1	1.64e-28	145.52	7180800000	3471400000	3709400000	2	95.6076
0.263133	1.9337	0.213326	NaN	0.822434	1.86659	0.90748	0.95258	NaN	0.379566	1.40301	-0.0516328	0.208249	NaN	0.802859	1.82216	0.88588	NaN	0.370532	0.32359	1.0024	0.945006	0.462384	0.564826	0.707906	NaN	1.18489	0.227514	NaN	1.99073	0.967833	1.49632	S	2	1880;1881	___1	antigen processing and presentation;biological regulation;cellular component movement;cellular localization;cellular macromolecule localization;cellular macromolecule metabolic process;cellular metabolic process;cellular process;cellular protein localization;cellular protein metabolic process;cellular response to stimulus;cytoskeleton-dependent intracellular transport;early endosome to Golgi tran…	binding;catalytic activity;cytoskeletal protein binding;GTP binding;GTPase activity;guanyl nucleotide binding;guanyl ribonucleotide binding;hydrolase activity;hydrolase activity, acting on acid anhydrides;hydrolase activity, acting on acid anhydrides, in phosphorus-containing anhydrides;myosin binding;myosin V binding;nucleoside-triphosphatase activity;nucleotide binding;protein binding;protein d…	cell part;cytoplasmic part;cytoplasmic vesicle;cytosol;extracellular membrane-bounded organelle;extracellular organelle;extracellular region part;extracellular vesicular exosome;Golgi apparatus;Golgi apparatus part;Golgi membrane;intracellular membrane-bounded organelle;intracellular organelle;intracellular organelle part;intracellular part;membrane;membrane-bounded organelle;membrane-bounded ves…				0.906502	1.88e-49	188.13	325850000	235720000	90137000	2	9.86564
-0.621547	-2.06527	-1.16452	-1.55834	-2.11888	-0.588599	-1.92263	-1.01849	-0.630431	-0.532906	-1.38472	-1.14379	-1.23756	-1.65609	-2.25179	-0.625518	-2.04323	-0.669974	-0.566332	-1.1171	-1.58389	-1.41352	-1.96148	-1.62886	-0.495999	-1.4588	-2.73353	-1.1881	-1.58989	-0.600515	-1.96156	-1.41276	S	2	1889;3290	___1	apoptosis;cell death;cellular component disassembly;cellular component disassembly at cellular level;cellular component disassembly involved in apoptosis;cellular component organization;cellular component organization at cellular level;cellular component organization or biogenesis;cellular component organization or biogenesis at cellular level;cellular process;death;programmed cell death	structural molecule activity	cell part;cytoskeletal part;envelope;intermediate filament;intracellular organelle part;intracellular part;lamin filament;macromolecular complex;membrane;nuclear envelope;nuclear inner membrane;nuclear membrane;nuclear part;nucleoplasm;organelle envelope;organelle inner membrane;organelle membrane;organelle part;protein complex		Casein kinase II substrate motif;ERK1,2 kinase substrate motif;G protein-coupled receptor kinase 1 substrate motif;GSK3 kinase substrate motif;GSK-3, ERK1, ERK2, CDK5 substrate motif;PKA kinase substrate motif;PKC kinase substrate motif;WW domain binding motif		1	4.26e-09	131.95	10647000000	3820200000	6826300000	391	73.7902
3.1804	NaN	NaN	2.99032	2.65921	2.95846	3.85761	2.39174	NaN	2.71104	1.9842	NaN	NaN	2.91915	2.59592	2.88804	3.76579	NaN	2.64652	NaN	NaN	NaN	0.0155593	1.85394	0.507316	NaN	0.873871	NaN	3.1892	3.15522	4.11417	2.11617	S	2	1895;1896	___1	biological regulation;negative regulation of apoptosis;negative regulation of biological process;negative regulation of catalytic activity;negative regulation of cell death;negative regulation of cellular process;negative regulation of endopeptidase activity;negative regulation of hydrolase activity;negative regulation of molecular function;negative regulation of peptidase activity;negative regul…	cysteine-type endopeptidase inhibitor activity;endopeptidase inhibitor activity;endopeptidase regulator activity;enzyme inhibitor activity;enzyme regulator activity;peptidase inhibitor activity;peptidase regulator activity	cell part;cytoplasm;cytoplasmic part;cytosol;intracellular part;membrane		ERK1,2 kinase substrate motif;Growth associated histone HI kinase substrate motif;GSK-3, ERK1, ERK2, CDK5 substrate motif;PKA kinase substrate motif;PKC kinase substrate motif;WW domain binding motif	+	1	4.42e-12	107.91	4640700000	4368100000	272700000	11	76.0229
-0.0661726	0.0964744	0.0986852	0.223289	0.0480407	0.0953063	0.552296	-0.0820299	0.254915	0.144464	0.0300256	0.399652	0.0963363	0.217974	0.0468973	0.0930379	0.539151	0.248848	0.141025	-0.126933	0.184869	0.110731	0.0437592	0.119074	0.209205	NaN	0.0583681	0.105248	0.238139	0.101645	0.589028	0.0320225	S	2	1903;8118	___1	apoptosis;biological adhesion;biological regulation;cell adhesion;cell cycle phase;cell cycle process;cell death;cell proliferation;cellular component organization;cellular component organization at cellular level;cellular component organization or biogenesis;cellular component organization or biogenesis at cellular level;cellular macromolecule metabolic process;cellular metabolic process;cellula…	adenyl nucleotide binding;adenyl ribonucleotide binding;ATP binding;binding;catalytic activity;cyclin-dependent protein kinase activity;kinase activity;nucleotide binding;phosphotransferase activity, alcohol group as acceptor;protein kinase activity;protein serine/threonine kinase activity;purine nucleotide binding;purine ribonucleoside triphosphate binding;purine ribonucleotide binding;ribonucle…	adherens junction;anchoring junction;apical plasma membrane;basolateral plasma membrane;cell junction;cell part;cytoplasm;integral to membrane;intracellular membrane-bounded organelle;intracellular organelle;intracellular organelle part;intracellular part;intrinsic to membrane;membrane part;membrane-bounded organelle;nuclear part;nucleoplasm;nucleus;organelle;organelle part;plasma membrane part		Cdc2 kinase substrate motif;CDK kinase substrate motif;CDK1,2,4,6 kinase substrate motif;ERK1,2 kinase substrate motif;G protein-coupled receptor kinase 1 substrate motif;Growth associated histone HI kinase substrate motif;GSK-3, ERK1, ERK2, CDK5 substrate motif;WW domain binding motif		1	2.95e-10	104.94	4311200000	2796300000	1514900000	224	80.4546
0.0422775	0.274127	0.454638	0.213226	0.11033	0.214944	0.181178	0.522874	NaN	0.242625	0.0800746	NaN	0.443817	0.208151	0.107704	0.209828	0.176866	NaN	0.236851	0.128428	0.107644	0.468765	0.00671232	0.0135279	0.162356	NaN	0.0865925	0.484874	0.227407	0.229239	0.193228	0.0854002	S	2	1903	___1	apoptosis;biological regulation;cell cycle phase;cell cycle process;cell death;cell proliferation;cellular component organization;cellular component organization at cellular level;cellular component organization or biogenesis;cellular component organization or biogenesis at cellular level;cellular macromolecule metabolic process;cellular metabolic process;cellular process;cellular protein metabol…	adenyl nucleotide binding;adenyl ribonucleotide binding;ATP binding;binding;catalytic activity;cyclin-dependent protein kinase activity;kinase activity;nucleotide binding;phosphotransferase activity, alcohol group as acceptor;protein kinase activity;protein serine/threonine kinase activity;purine nucleotide binding;purine ribonucleoside triphosphate binding;purine ribonucleotide binding;ribonucle…	cell part;cytoplasm;intracellular membrane-bounded organelle;intracellular organelle;intracellular organelle part;intracellular part;membrane-bounded organelle;nuclear part;nucleoplasm;nucleus;organelle;organelle part		Cdc2 kinase substrate motif;CDK kinase substrate motif;CDK1,2,4,6 kinase substrate motif;ERK1,2 kinase substrate motif;GSK-3, ERK1, ERK2, CDK5 substrate motif;PKA kinase substrate motif;PKC kinase substrate motif;WW domain binding motif		0.999985	2.55e-06	112.42	2656900000	1796700000	860200000	65	48.3702
NaN	0.303069	0.0418312	-0.681279	-0.184835	0.138468	0.0265616	0.219604	NaN	0.38725	-0.132856	NaN	0.0408356	-0.724011	-0.196429	0.135172	0.0259294	NaN	0.378033	0.203508	NaN	-0.103844	-0.355069	NaN	NaN	NaN	NaN	0.0446133	-0.695071	0.147677	0.0283281	-0.135546	S	4	1903;8118	___1	apoptosis;biological regulation;cell cycle phase;cell cycle process;cell death;cell proliferation;cellular component organization;cellular component organization at cellular level;cellular component organization or biogenesis;cellular component organization or biogenesis at cellular level;cellular macromolecule metabolic process;cellular metabolic process;cellular process;cellular protein metabol…	adenyl nucleotide binding;adenyl ribonucleotide binding;ATP binding;binding;catalytic activity;cyclin-dependent protein kinase activity;kinase activity;nucleotide binding;phosphotransferase activity, alcohol group as acceptor;protein kinase activity;protein serine/threonine kinase activity;purine nucleotide binding;purine ribonucleoside triphosphate binding;purine ribonucleotide binding;ribonucle…	cell part;cytoplasm;intracellular membrane-bounded organelle;intracellular organelle;intracellular organelle part;intracellular part;membrane-bounded organelle;nuclear part;nucleoplasm;nucleus;organelle;organelle part		14-3-3 domain binding motif;b-Adrenergic Receptor kinase substrate motif;Calmodulin-dependent protein kinase II alpha substrate motif;Calmodulin-dependent protein kinase II substrate motif;Calmodulin-dependent protein kinase IV substrate motif;Casein kinase II substrate motif;PKA kinase substrate motif;PKC epsilon kinase substrate motif;PKC kinase substrate motif;Plk1 kinase substrate motif;Pyruv…		0.999976	5.75e-35	147.49	1551400000	1070100000	481280000	72	46.1494
2.4482	NaN	1.36005	4.28129	3.99797	1.62657	2.80233	1.54042	4.23144	3.5699	2.68876	3.94597	1.32768	4.17939	3.90282	1.58785	2.73563	4.13073	3.48493	3.08833	2.51559	0.918688	1.54866	1.45248	0.878334	NaN	2.55585	1.4505	4.56603	1.73475	2.9887	2.86758	S	3	1908	___1	actin crosslink formation;actin cytoskeleton organization;actin cytoskeleton reorganization;actin filament organization;actin filament-based process;anatomical structure formation involved in morphogenesis;anatomical structure morphogenesis;biological adhesion;biological regulation;biosynthetic process;blood coagulation;cAMP-mediated signaling;cell activation;cell adhesion;cell cycle process;cell…	actin binding;actin filament binding;binding;cytoskeletal protein binding;enzyme binding;Fc-gamma receptor I complex binding;glycoprotein binding;GTPase binding;identical protein binding;immunoglobulin receptor binding;molecular transducer activity;protein binding;protein dimerization activity;protein homodimerization activity;Rac GTPase binding;Ral GTPase binding;Ras GTPase binding;receptor bind…	actin cytoskeleton;actin filament;adherens junction;anchoring junction;cell body;cell cortex part;cell junction;cell part;cell projection part;cell-substrate adherens junction;cell-substrate junction;chromosomal part;cortical cytoskeleton;cytoplasm;cytoplasmic part;cytoskeletal part;cytoskeleton;cytosol;dendritic shaft;extracellular membrane-bounded organelle;extracellular organelle;extracellular…	Focal adhesion;MAPK signaling pathway	14-3-3 domain binding motif;Akt kinase substrate motif;Calmodulin-dependent protein kinase II substrate motif;DNA dependent Protein kinase substrate motif;MAPKAPK1 kinase substrate motif;p70 Ribosomal S6 kinase substrate motif;Phosphorylase kinase substrate motif;PKA kinase substrate motif;PKC kinase substrate motif;PP2B substrate motif;ZIP kinase substrate motif		1	4.99e-78	186.06	21481000000	19767000000	1714000000	2144	103.611
1.32992	4.39187	1.06876	3.36763	2.12935	2.38623	2.40832	0.843272	2.7775	2.17703	1.49586	2.88452	1.04332	3.28747	2.07867	2.32943	2.351	2.7114	2.12521	0.962308	1.82579	0.776645	1.63928	1.57858	0.678101	NaN	3.13391	1.13984	3.5916	2.54493	2.56849	1.59535	S	2	1908	___1	actin crosslink formation;actin cytoskeleton organization;actin cytoskeleton reorganization;actin filament organization;actin filament-based process;anatomical structure formation involved in morphogenesis;anatomical structure morphogenesis;biological adhesion;biological regulation;biosynthetic process;blood coagulation;cAMP-mediated signaling;cell activation;cell adhesion;cell cycle process;cell…	actin binding;actin filament binding;binding;cytoskeletal protein binding;enzyme binding;Fc-gamma receptor I complex binding;glycoprotein binding;GTPase binding;identical protein binding;immunoglobulin receptor binding;molecular transducer activity;protein binding;protein dimerization activity;protein homodimerization activity;Rac GTPase binding;Ral GTPase binding;Ras GTPase binding;receptor bind…	actin cytoskeleton;actin filament;adherens junction;anchoring junction;cell body;cell cortex part;cell junction;cell part;cell projection part;cell-substrate adherens junction;cell-substrate junction;chromosomal part;cortical cytoskeleton;cytoplasm;cytoplasmic part;cytoskeletal part;cytoskeleton;cytosol;dendritic shaft;extracellular membrane-bounded organelle;extracellular organelle;extracellular…	Focal adhesion;MAPK signaling pathway	ERK1,2 kinase substrate motif;GSK-3, ERK1, ERK2, CDK5 substrate motif;WW domain binding motif		1	5.17e-43	174.47	3802000000	3421400000	380590000	1459	82.5807
[truncated: 2,884 more rows]
[truncated: 10 more columns]

## Sheet: Significant phoshosites (HSD)
RELAPSE	RELAPSE_CN	RELAPSE_M1M2	RELAPSE_NPM1_MUT	Amino acid	Charge	Protein group IDs	Multiplicity	GOBP name	GOMF name	GOCC name	KEGG name	Motifs	ANOVA Significant	Localization prob	PEP	Score	Intensity	Intensity L	Intensity H	Position	Score diff	ANOVA p value	Proteins	Positions within proteins	Leading proteins	Protein	Protein names	Gene names	Sequence window	Phospho (STY) Probabilities	id	Significant pairs
[truncated: 306 more rows]
