# Supplementary material for: High Mitochondrial Protein Expression as a Potential Predictor of Relapse Risk in Acute Myeloid Leukemia Patients with the Monocytic FAB subtypes M4 and M5
Source: Preprints.org preprint supplement (doi:10.20944/preprints202310.1628.v1), 2023-10-25
Supplement: Supplementary file 4 [file Supplementary file 3_Number of regulated phosphosites and proteins in the different comparison studies.xlsx]

## Sheet: Hoja1
FAB M1/M2 RELAPSE vs FAB M4/M5 RELAPSE	COMPARISON STUDY	NUMBER OF SIGNIFICANTLY REGULATED PROTEINS	NUMBER OF SIGNIFICANTLY REGULATED PHOSPHORYLATION SITES
Higher FC in FAB M1/M2	REL_M1/2_all vs REL_M4/5_all	162	32
	REL_M1/2_all vs REL_M4/5_CN	131	44
	REL_M1/2_all vs REL_M4/5_mut	34	24
Higher FC in FAB M4/M5	REL_M4/5_all vs REL_M1/2_all	268	94
	REL_M4/5_CN vs REL_M1/2_all	382	89
	REL_M4/5_mut vs REL_M1/2_all	283	86
FAB M4/M5 RELAPSE vs FAB M4/M5 REL_FREE	COMPARISON STUDY	NUMBER OF SIGNIFICANTLY REGULATED PROTEINS	NUMBER OF SIGNIFICANTLY REGULATED PHOSPHORYLATION SITES
Higher FC in RELAPSE	REL_M4/5_all vs REL_F_M4/5_all	14	9
	REL_M4/5_CN vs REL_F_M4/5_CN	27	6
	REL_M4/5_mut vs REL_F_M4/5_mut	145	17
Higher FC in REL_FREE	REL_F_M4/5_all vs REL_M4/5_all	0	2
	REL_F_M4/5_CN vs REL_M4/5_CN	21	4
	REL_F_M4/5_mut vs REL_M4/5_mut	48	17
(FC stands for fold change, CN for normal cytogenetics and mut for NPM1 Ins mutation, as described in the main text of the publication)
