# Supplementary material for: High Mitochondrial Protein Expression as a Potential Predictor of Relapse Risk in Acute Myeloid Leukemia Patients with the Monocytic FAB subtypes M4 and M5
Source: Preprints.org preprint supplement (doi:10.20944/preprints202310.1628.v1), 2023-10-25
Supplement: Supplementary file 5 [file Supplementary file 5_Phosphoproteomics data REL_F_M4_M5_ and REL_M4_M5 subgroups.xlsx]

## Sheet: Details
Details:
Datasheet "Phosphosites" contains MS phosphoproteomic data from each patients (row 1 and 2 of datasheet "Phosphosites") and AML disease subgroups: 12 REL_M4/5_all, 7 REL_M4/5_CN, 5 REL_M4/5_mut, 14 REL_F_M4/5_all, 9 REL_F_M4/5_CN and 8 REL_F_M4/5_mut. CN refers to normal cytogenetics and mut to NPM1 Ins mutation It shows phosphoproteomics data after selecting at least 3 quantified proteins (valid…
Patient number with no sufix, with sufix _1 and sufix_2 indicates a patient that is found in the non-stratified subgroups, in the CN-stratified subgroups and in the mut-stratified subgroups, respectively
Datasheet "Significant phosphosites (HSD)" contains significantly different phosphosite pairs after applying post hoc Turkey’s Honest Significance Difference (HSD) test with FDR < 0.05 on the significant findings of the ANOVA multiple sample test
REL_F refers to RELAPSE_FREE
All patients have an M4/M5 FAB classification

## Sheet: Phosphosites
P10	P11	P13	P14	P17	P18	P2	P22	P23	P24	P29	P31	P34	P36	P37	P42	P43	P44	P45	P46	P47	P49	P50	P51	P52	P53	P10_1	P13_1	P14_1	P18_1	P2_1	P22_1	P23_1	P24_1	P29_1	P34_1	P45_1	P46_1	P47_1	P49_1	P50_1	P53_1	P13_2	P14_2	P18_2	P2_2	P23_2	P24_2	P34_2	P44_2
REL_F_all	RELAPSE_all	REL_F_all	REL_F_all	RELAPSE_all	RELAPSE_all	RELAPSE_all	RELAPSE_all	RELAPSE_all	REL_F_all	REL_F_all	REL_F_all	RELAPSE_all	REL_F_all	RELAPSE_all	REL_F_all	REL_F_all	REL_F_all	RELAPSE_all	REL_F_all	REL_F_all	REL_F_all	RELAPSE_all	RELAPSE_all	RELAPSE_all	REL_F_all	REL_F_CN	REL_F_CN	REL_F_CN	RELAPSE_CN	RELAPSE_CN	RELAPSE_CN	RELAPSE_CN	REL_F_CN	REL_F_CN	RELAPSE_CN	RELAPSE_CN	REL_F_CN	REL_F_CN	REL_F_CN	RELAPSE_CN	REL_F_CN	REL_F_mut	REL_F_mut	RELAPSE_mut	RELAPSE_mut	RELAPSE_mut	REL_F_mut	RELAPSE_mut	REL_F_mut
NaN	NaN	NaN	NaN	0.732421	2.07543	NaN	0.0239595	0.623269	NaN	1.96742	NaN	NaN	0.26881	0.672995	1.0962	0.360362	NaN	NaN	0.214325	0.944459	NaN	0.962087	1.80034	NaN	1.022	NaN	NaN	NaN	2.02603	NaN	0.0233893	0.608435	NaN	1.92059	NaN	NaN	0.209224	0.92198	NaN	0.939188	0.997675	NaN	NaN	2.21346	NaN	0.664721	NaN	NaN	NaN
0.152054	0.0197672	0.127124	-0.307526	-0.356101	-0.0658345	-0.0391613	-0.244874	-0.0792406	-0.218864	0.065051	-0.459649	-0.439149	-0.171317	-0.63405	-0.0208887	-0.442643	-0.300014	-0.398022	-0.48294	-0.196904	-0.687735	-0.184853	-0.19014	-0.415344	-0.484861	0.148435	0.124098	-0.326815	-0.0699638	-0.0416176	-0.260233	-0.0842108	-0.232592	0.0635027	-0.466694	-0.422987	-0.513232	-0.209254	-0.730872	-0.196448	-0.515273	0.135578	-0.313752	-0.0671672	-0.0399541	-0.0808447	-0.223295	-0.448039	-0.306088
NaN	1.81902	1.73176	0.361829	NaN	NaN	NaN	1.52304	0.369752	1.49271	2.46413	2.16179	1.69969	2.35852	1.05087	1.87834	NaN	1.68061	NaN	1.21359	0.738014	NaN	NaN	1.66529	3.56632	NaN	NaN	1.69054	0.353217	NaN	NaN	1.48679	0.360951	1.45718	2.40548	1.65923	NaN	1.1847	0.720448	NaN	NaN	NaN	1.84693	0.385893	NaN	NaN	0.394343	1.59199	1.81273	1.79238
NaN	1.4782	1.16044	0.844626	0.11888	-0.541539	NaN	1.51203	-0.405881	1.09133	1.01046	-0.148478	0.891478	NaN	0.409999	1.48709	NaN	NaN	NaN	0.236166	NaN	NaN	0.956361	-0.0716412	NaN	-0.948775	NaN	1.13282	0.824523	-0.575506	NaN	1.47604	-0.431339	1.06535	0.986411	0.870259	NaN	0.230545	NaN	NaN	0.933598	-1.00829	1.23762	0.9008	-0.552502	NaN	-0.414098	1.16391	0.950767	NaN
-0.397297	0.611738	NaN	NaN	-0.909238	NaN	1.13737	1.28383	-0.789949	1.05336	1.12623	2.05085	NaN	1.76907	0.331301	NaN	-0.0703934	1.76797	NaN	1.04506	1.19008	1.23408	NaN	0.329449	-0.22131	1.32817	-0.422217	NaN	NaN	NaN	1.11029	1.25327	-0.839497	1.02829	1.09942	NaN	NaN	1.02019	1.16176	1.20471	NaN	1.29656	NaN	NaN	NaN	1.21301	-0.805941	1.12342	NaN	1.88555
NaN	0.908012	NaN	0.615021	-0.929496	NaN	NaN	1.68668	0.501029	1.85891	0.320395	1.30251	1.53383	1.82236	0.696942	-0.780603	NaN	1.83447	NaN	1.64749	1.66367	1.72869	1.10735	0.777063	NaN	1.33756	NaN	NaN	0.600382	NaN	NaN	1.64654	0.489104	1.81466	0.312769	1.49732	NaN	1.60828	1.62407	1.68755	1.08099	1.30573	NaN	0.655924	NaN	NaN	0.534351	1.98254	1.63584	1.95647
0.900168	0.182825	0.913185	NaN	0.573976	1.0104	0.384204	NaN	-0.0417607	-0.358608	0.760112	-0.286892	-0.132521	-0.103683	0.0610535	0.63725	0.103643	-0.374285	-0.0177586	0.114176	0.286551	0.367558	0.168754	0.607861	0.672242	0.507553	0.878743	0.89145	NaN	0.986354	0.375059	NaN	-0.04438	-0.381101	0.74202	-0.140833	-0.0188725	0.111459	0.279731	0.35881	0.164738	0.495473	0.973918	NaN	1.0776	0.409756	-0.0426061	-0.365868	-0.135204	-0.381862
NaN	2.80228	0.598472	NaN	NaN	-0.718675	2.39516	1.20602	2.68654	4.01628	1.25002	2.30445	2.73931	3.22108	2.65616	0.615992	2.06735	3.69306	2.43058	3.12862	4.11421	3.57375	3.61325	1.48595	4.39691	2.02361	NaN	0.584227	NaN	-0.763752	2.33815	1.17731	2.6226	3.92068	1.22026	2.67411	2.37273	3.05415	4.01628	3.48869	3.52725	1.97545	0.638274	NaN	-0.733224	2.55445	2.86522	4.28339	2.92149	3.93868
-3.78119	-2.29477	-3.09355	-2.18251	-4.77216	-2.89522	-4.20831	-3.4448	-3.59037	-2.88316	-2.47628	-4.17837	-3.60299	-4.49797	-6.126	-5.21634	-4.3558	-4.35659	-1.79564	-3.49544	-2.29527	-2.22067	-2.63981	-5.51708	NaN	NaN	-4.01836	-3.28758	-2.31941	-3.07682	-4.47227	-3.66087	-3.81557	-3.064	-2.6316	-3.82898	-1.90827	-3.71469	-2.43923	-2.35996	-2.80539	NaN	-3.15617	-2.2267	-2.95383	-4.2935	-3.66306	-2.94153	-3.67593	-4.44479
NaN	0.51191	0.388231	1.10564	1.6139	2.86774	NaN	NaN	0.0949411	-0.3428	-0.535213	-0.386645	0.994735	0.755147	-0.246859	1.01135	-0.50148	0.869241	1.28962	1.11744	1.30905	NaN	0.51219	-0.664731	NaN	1.30655	NaN	0.378991	1.07932	2.79949	NaN	NaN	0.0926814	-0.364302	-0.568783	0.971059	1.25893	1.09084	1.2779	NaN	0.499999	1.27546	0.414052	1.17917	3.05847	NaN	0.101255	-0.34974	1.06089	0.927051
NaN	0.226497	0.687746	0.53015	-0.245387	1.75247	1.31206	1.18407	0.260886	0.877011	2.22236	0.0930406	0.189945	-0.155001	-0.21417	1.0142	NaN	NaN	NaN	0.517275	1.0233	1.29475	1.07243	1.49279	0.784655	NaN	NaN	0.671377	0.517532	1.71076	1.28083	1.15588	0.254676	0.856137	2.16946	0.185424	NaN	0.504963	0.998944	1.26393	1.0469	NaN	0.733486	0.565409	1.86902	1.39932	0.278236	0.935338	0.202578	NaN
NaN	-0.307628	-0.955972	-1.06489	-0.96763	-1.15402	NaN	-0.973837	-1.29598	-0.913455	-1.09051	-1.11103	-0.879952	-1.21884	-0.320391	-0.927753	NaN	NaN	-1.98228	NaN	-0.725318	-2.07777	-1.50726	-1.29014	-0.308336	-0.530692	NaN	-1.01593	-1.13168	-1.2264	NaN	-1.03492	-1.37726	-0.970749	-1.15891	-0.935145	-2.10661	NaN	-0.770812	-2.20809	-1.6018	-0.563978	-0.975325	-1.08645	-1.17738	NaN	-1.32221	-0.931947	-0.897766	NaN
NaN	1.56696	0.756823	0.616824	0.557075	-0.733226	0.718408	1.09535	0.799027	1.13135	0.45979	1.16529	1.45618	1.21961	1.52302	1.15804	1.19952	1.3287	0.965368	1.25418	1.24052	1.02445	0.575624	0.416277	1.01305	0.63019	NaN	0.73881	0.602143	-0.779217	0.701309	1.06927	0.780009	1.10442	0.448846	1.42152	0.942391	1.22433	1.211	1.00006	0.561923	0.61519	0.807157	0.657847	-0.74807	0.766188	0.852168	1.20659	1.55303	1.41706
NaN	1.39563	-0.0236814	0.784975	0.728921	NaN	NaN	0.584501	1.15377	1.09698	NaN	1.0807	0.838593	0.0850935	1.53122	0.956885	NaN	1.15081	0.0567545	0.674679	1.13273	NaN	0.48773	0.452061	0.647601	0.979677	NaN	-0.0251668	0.766292	NaN	NaN	0.570589	1.12631	1.07087	NaN	0.818633	0.0554036	0.658621	1.10577	NaN	0.476121	0.956359	-0.0241608	0.837181	NaN	NaN	1.2305	1.16993	0.894365	1.22734
NaN	1.57068	-0.273221	NaN	NaN	-0.896087	0.243448	0.736037	NaN	NaN	0.0247938	NaN	1.39557	0.729933	0.894792	0.991066	0.868269	1.00897	-0.0485456	0.860953	NaN	1.24907	0.809389	NaN	NaN	0.837421	NaN	-0.290359	NaN	-0.952292	0.237654	0.718519	NaN	NaN	0.0242037	1.36235	-0.0515905	0.840461	NaN	1.21934	0.790125	0.81749	-0.278752	NaN	-0.914228	0.259639	NaN	NaN	1.48839	1.07608
NaN	1.36804	NaN	NaN	0.525992	-0.618165	NaN	0.970592	1.20486	0.986903	0.653991	1.1276	1.13064	1.04883	1.54622	1.46531	1.11782	NaN	NaN	0.656703	NaN	1.37912	0.412447	1.02474	NaN	1.18342	NaN	NaN	NaN	-0.656938	NaN	0.947491	1.17618	0.963413	0.638425	1.10373	NaN	0.641072	NaN	1.3463	0.40263	1.15526	NaN	NaN	-0.630679	NaN	1.28499	1.05254	1.20584	NaN
NaN	0.732373	0.957234	-0.0327557	0.463824	-0.644013	0.283499	0.241376	0.373127	0.23093	0.274975	0.572661	0.719586	0.717305	0.810847	0.375067	-0.221816	0.630683	-0.531794	0.566981	0.389544	0.379219	-0.0790583	0.179795	0.67652	0.440673	NaN	0.934451	-0.0348102	-0.684408	0.276751	0.235631	0.364246	0.225434	0.26843	0.702459	-0.56515	0.553486	0.380272	0.370193	-0.0840171	0.430185	1.0209	-0.0334188	-0.657051	0.302353	0.397943	0.246289	0.767444	0.672628
NaN	0.145005	NaN	NaN	NaN	-1.08939	0.791957	0.305598	0.642771	0.413006	-0.0231117	0.265997	0.541351	0.687354	-0.226606	-0.263472	-1.33641	0.603634	NaN	0.559633	NaN	0.662366	1.24871	NaN	NaN	NaN	NaN	NaN	NaN	-1.15772	0.773107	0.298324	0.627472	0.403176	-0.0245613	0.528466	NaN	0.546313	NaN	0.646601	1.21899	NaN	NaN	NaN	-1.11145	0.844628	0.68552	0.440474	0.577355	0.64378
-1.25399	NaN	NaN	-0.668957	-0.325715	0.49717	0.0940408	-0.903283	0.090838	NaN	NaN	-0.758446	NaN	-1.2456	-0.557999	-0.119925	NaN	NaN	NaN	-1.00519	-0.656648	-0.527151	0.0868845	-0.177557	NaN	0.121509	-1.33264	NaN	-0.710916	0.485337	0.0918025	-0.959939	0.088676	NaN	NaN	NaN	NaN	-1.06823	-0.697835	-0.560215	0.0848165	0.118617	NaN	-0.682499	0.530235	0.100295	0.0968794	NaN	NaN	NaN
NaN	-0.302937	0.0489415	-0.146041	0.63352	0.663768	-0.118365	-0.0803959	-0.148534	-0.43137	-0.380521	0.066517	-0.00719724	-0.213132	-0.513144	-0.0653154	-0.197794	-0.322115	0.325825	-0.237102	-0.314821	-0.487859	0.0705083	-0.350035	0.151237	-0.144953	NaN	0.0477766	-0.155201	0.647969	-0.12579	-0.0854386	-0.157851	-0.458427	-0.404389	-0.00764867	0.31807	-0.251974	-0.334568	-0.51846	0.0688301	-0.154045	0.0521964	-0.148998	0.707913	-0.120762	-0.151541	-0.440102	-0.00734294	-0.328636
NaN	-0.472017	0.732283	0.0506907	-0.235271	0.824963	0.649232	0.0591534	0.38963	0.163761	0.374408	-0.556952	-0.251786	-0.206199	0.1079	0.464348	NaN	-0.0566564	0.498738	-0.522733	0.012081	-0.0183196	0.327582	1.01556	-0.0266672	0.350484	NaN	0.714853	0.0494842	0.805328	0.633779	0.0577455	0.380357	0.159863	0.365496	-0.267579	0.486867	-0.55552	0.0117934	-0.0194686	0.319785	0.342142	0.780985	0.054062	0.879829	0.69241	0.415543	0.174652	-0.256884	-0.0578034
NaN	-1.33262	-1.4509	NaN	-0.306252	NaN	-0.623259	-1.44868	-0.128724	-1.6421	-0.145749	-0.670974	-1.15388	-0.875576	-1.07581	-0.507868	NaN	-1.27123	NaN	-1.28389	-0.994096	NaN	NaN	-0.000915045	-0.614384	-1.0268	NaN	-1.54191	NaN	NaN	-0.662352	-1.53955	-0.136798	-1.7451	-0.154891	-1.22626	NaN	-1.36442	-1.05645	NaN	NaN	-1.0912	-1.48028	NaN	NaN	-0.635876	-0.13133	-1.67535	-1.17724	-1.29697
NaN	0.661342	2.42496	NaN	0.323674	2.51933	NaN	NaN	2.10954	0.767221	NaN	1.51286	1.60347	-1.14332	0.817947	0.937938	NaN	1.35299	NaN	0.725261	1.07525	NaN	1.73426	2.57211	NaN	2.09719	NaN	2.36724	NaN	2.45937	NaN	NaN	2.05933	0.74896	NaN	1.56531	NaN	0.707999	1.04966	NaN	1.69298	2.04727	2.58624	NaN	2.68689	NaN	2.24984	0.818247	1.71011	1.44297
NaN	-0.457086	-0.570573	-0.139842	0.603175	0.589012	-0.217506	-0.224495	-0.339354	-0.596119	0.0901832	-0.685421	-0.225126	-0.638086	-0.779852	-0.445836	-0.039866	-0.526162	-0.171157	-0.255572	-0.131286	-0.195593	0.152388	-0.0829993	-0.253757	-0.381355	NaN	-0.606361	-0.148613	0.574992	-0.231148	-0.238576	-0.360639	-0.633509	0.0880367	-0.239246	-0.181892	-0.271602	-0.139521	-0.207861	0.148761	-0.405275	-0.582124	-0.142673	0.628185	-0.221909	-0.346224	-0.608187	-0.229683	-0.536814
NaN	-0.456965	NaN	NaN	NaN	0.800218	NaN	-0.015191	0.165699	-1.69133	1.03774	NaN	NaN	-0.930251	0.345621	-0.412257	NaN	-0.640648	NaN	0.114831	NaN	NaN	0.0425068	0.878295	NaN	0.897784	NaN	NaN	NaN	0.781171	NaN	-0.0161438	0.161755	-1.79741	1.01304	NaN	NaN	0.112097	NaN	NaN	0.0414951	0.876415	NaN	NaN	0.853438	NaN	0.176719	-1.72557	NaN	-0.653617
1.37206	2.04323	2.95421	1.44419	1.7553	1.88489	3.35283	0.516684	1.8882	1.38321	2.45643	-1.88798	1.9347	-0.522941	2.1068	1.91828	1.84343	1.01069	2.02911	1.13304	1.37462	1.11792	3.18826	2.22164	1.62731	1.84206	1.3394	2.8839	1.40982	1.84002	3.27303	0.504386	1.84326	1.35029	2.39796	1.88865	1.98082	1.10607	1.3419	1.09131	3.11237	1.79822	3.15069	1.54024	2.01024	3.57582	2.01378	1.47521	2.06337	1.07791
NaN	0.188456	1.17817	-0.0750426	-0.331009	1.37765	NaN	0.453611	0.0288992	-0.140555	1.35706	-0.297976	-0.595407	0.745758	0.156722	1.27278	1.74119	0.0249349	NaN	-1.30007	0.26131	0.223845	0.557182	0.533237	1.49965	-0.0490137	NaN	1.15013	-0.0797495	1.34486	NaN	0.442814	0.0282113	-0.149371	1.32476	-0.632753	NaN	-1.38162	0.255091	0.218517	0.543921	-0.052088	1.25652	-0.0765617	1.46928	NaN	0.0308212	-0.143401	-0.60746	0.0265932
NaN	0.134134	0.970527	0.257069	0.426644	0.467907	0.800962	1.69475	1.08764	0.184401	0.700644	0.480844	0.292711	0.5402	0.205787	0.755355	0.719107	0.473614	-0.418736	0.0224663	-0.0414459	0.476712	0.662385	0.764108	NaN	0.607129	NaN	0.947427	0.25095	0.45677	0.781898	1.65441	1.06175	0.180012	0.683968	0.285744	-0.445	0.0219315	-0.0440455	0.465366	0.646619	0.592679	1.03507	0.274165	0.499026	0.854231	1.15997	0.196665	0.312178	0.505113
NaN	0.215787	0.575005	0.39456	0.16469	-0.195992	-0.0423517	0.111042	0.354533	0.243255	0.196484	0.0713245	0.0901817	0.48784	0.461815	-0.900497	1.0519	0.107734	-0.280379	-0.00141767	-0.0949279	0.28831	0.230397	0.101633	0.687063	0.447934	NaN	0.561319	0.385169	-0.208285	-0.0450082	0.108399	0.346094	0.237465	0.191808	0.0880353	-0.297966	-0.00150659	-0.100882	0.281448	0.224913	0.437273	0.613247	0.420801	-0.19996	-0.0432091	0.378111	0.259433	0.0961795	0.114899
NaN	0.549281	1.1269	0.576155	-0.422951	-0.0846162	-0.372338	0.799077	0.939519	0.281177	-0.0569126	0.766184	0.663768	-0.16547	1.05977	0.328194	NaN	0.180731	NaN	0.0230915	0.536887	0.664825	0.891075	0.107497	NaN	0.205963	NaN	1.10008	0.562441	-0.0899236	-0.395692	0.780058	0.917157	0.274484	-0.0604824	0.64797	NaN	0.0225419	0.524108	0.649001	0.869866	0.20106	1.20185	0.614473	-0.0863292	-0.379875	1.002	0.299877	0.707913	0.192751
-2.23683	-1.79494	-2.29719	NaN	-2.15098	-1.64786	-2.0302	-3.62403	-0.380418	NaN	-2.46317	-0.637961	-1.70443	NaN	-1.58921	-0.990573	-2.24085	-1.13067	-1.46098	NaN	-2.65128	-2.50634	-1.38809	NaN	-1.99218	-1.93703	-2.37713	-2.44128	NaN	-1.75122	-2.15755	-3.85134	-0.404279	NaN	-2.61767	-1.81134	-1.55261	NaN	-2.81758	-2.66355	-1.47515	-2.05853	-2.3437	NaN	-1.68122	-2.0713	-0.388119	NaN	-1.73894	-1.15356
NaN	0.377493	1.42093	0.534959	NaN	NaN	NaN	0.28212	0.312675	0.280092	-0.237436	0.169737	0.0831747	NaN	0.596123	0.0311921	NaN	0.29301	0.0943071	0.522166	0.314986	NaN	NaN	0.822242	NaN	-0.0703134	NaN	1.38711	0.522227	NaN	NaN	0.275405	0.305233	0.273425	-0.252328	0.081195	0.0920624	0.509738	0.307489	NaN	NaN	-0.0747237	1.51543	0.570538	NaN	NaN	0.33347	0.29872	0.0887064	0.312497
NaN	0.955667	0.796649	2.19492	0.492379	-0.0119942	NaN	NaN	-0.0108966	1.53672	0.782001	1.51347	0.648803	0.558508	0.851446	0.189613	1.39991	1.25166	NaN	0.995304	2.07754	1.25403	-0.0972396	1.4923	1.0701	-0.0704908	NaN	0.777688	2.14268	-0.0127465	NaN	NaN	-0.0115801	1.50014	0.763389	0.63336	NaN	0.971615	2.02809	1.22418	-0.103339	-0.0749122	0.849632	2.3409	-0.012237	NaN	-0.0111172	1.63892	0.691953	1.3349
NaN	0.00786285	-0.0171117	NaN	0.410686	NaN	NaN	NaN	0.557008	0.495007	-0.326536	0.327989	0.577217	0.880379	0.0114818	-0.337236	NaN	0.548825	-0.121619	0.257865	NaN	NaN	0.505709	0.326792	0.173143	0.485555	NaN	-0.018185	NaN	NaN	NaN	NaN	0.543751	0.483225	-0.347018	0.563479	-0.129248	0.251728	NaN	NaN	0.493673	0.473998	-0.0174582	NaN	NaN	NaN	0.594053	0.527929	0.615606	0.585326
-0.548784	-0.0560807	-0.463256	-0.481182	-0.0905169	-0.346873	-0.519938	-0.385122	-0.0168959	NaN	-0.176665	-0.214231	-0.382196	0.1892	-0.177999	0.185501	NaN	NaN	-0.359468	0.0702328	-0.231719	-0.921207	-0.295276	-0.290456	-0.183981	NaN	-0.583205	-0.492313	-0.511364	-0.36863	-0.55255	-0.409279	-0.0179557	NaN	-0.187746	-0.406168	-0.382014	0.0685612	-0.246253	-0.978988	-0.313796	NaN	-0.472634	-0.490923	-0.353895	-0.530463	-0.0172379	NaN	-0.389933	NaN
NaN	-0.334415	NaN	-0.564485	-0.24162	NaN	NaN	-0.783818	0.431606	-0.71362	-0.0490596	-0.188537	-0.317898	0.114052	-0.14443	1.15916	-0.45369	-0.901686	NaN	-0.747291	-0.456185	NaN	-0.249994	-0.365542	-1.00859	-0.842542	NaN	NaN	-0.599892	NaN	NaN	-0.832981	0.421333	-0.75838	-0.0521367	-0.337838	NaN	-0.794163	-0.484799	NaN	-0.265675	-0.895389	NaN	-0.575913	NaN	NaN	0.460311	-0.728066	-0.324334	-0.91994
NaN	-0.334415	NaN	-0.564485	-0.24162	NaN	NaN	-0.783818	0.431606	-0.71362	-0.0490596	-0.188537	-0.317898	0.114052	-0.14443	1.15916	-0.45369	-0.901686	NaN	-0.747291	-0.456185	NaN	-0.249994	-0.365542	-1.00859	-0.842542	NaN	NaN	-0.599892	NaN	NaN	-0.832981	0.421333	-0.75838	-0.0521367	-0.337838	NaN	-0.794163	-0.484799	NaN	-0.265675	-0.895389	NaN	-0.575913	NaN	NaN	0.460311	-0.728066	-0.324334	-0.91994
NaN	0.719821	1.34391	0.934968	0.653941	1.57174	1.08167	0.590942	1.12852	0.99553	0.826925	-1.21887	0.84699	-0.497055	0.669879	1.13464	0.425751	0.492367	0.779024	NaN	0.827132	1.08886	1.43597	0.578546	1.31554	NaN	NaN	1.31193	0.912715	1.53433	1.05592	0.576876	1.10166	0.971835	0.807243	0.826831	0.760482	NaN	0.807445	1.06295	1.40179	NaN	1.43329	0.99715	1.67627	1.1536	1.20357	1.06174	0.903321	0.525113
NaN	-0.425037	NaN	-2.01198	-0.332151	-0.480714	-1.25287	-0.172661	-0.471906	1.27073	-2.49461	0.417465	0.35803	1.27057	-0.22905	-1.10908	0.424701	1.7275	-1.23793	1.02802	0.816704	0.979804	1.30105	-0.83666	-0.68232	0.435757	NaN	NaN	-2.13817	-0.510866	-1.33146	-0.183491	-0.501506	1.24049	-2.65108	0.349508	-1.31557	1.00355	0.797265	0.956483	1.27008	0.425385	NaN	-2.05271	-0.490446	-1.27823	-0.48146	1.35524	0.381841	1.84239
NaN	NaN	NaN	NaN	1.04533	NaN	1.72591	0.310723	1.26928	0.455016	1.29222	NaN	NaN	0.561094	0.801776	1.40095	NaN	NaN	NaN	0.296217	0.280719	NaN	0.774277	1.52164	1.01766	1.20422	NaN	NaN	NaN	NaN	1.68483	0.303327	1.23907	0.444186	1.26147	NaN	NaN	0.289167	0.274037	NaN	0.755849	1.17556	NaN	NaN	NaN	1.84069	1.35369	0.485278	NaN	NaN
NaN	0.268228	1.10784	0.594794	0.772035	NaN	1.51154	0.436371	0.511328	0.0162608	NaN	0.515131	0.189861	0.855875	NaN	1.325	1.09817	NaN	0.441293	0.421934	NaN	NaN	0.139114	0.502326	NaN	1.07359	NaN	1.08147	0.580637	NaN	1.47556	0.425984	0.499158	0.0158737	NaN	0.185342	0.43079	0.411891	NaN	NaN	0.135803	1.04803	1.18152	0.634352	NaN	1.61206	0.545335	0.0173422	0.202488	NaN
NaN	-0.951619	-1.63146	-1.53858	-1.11427	-1.74475	-1.7668	-0.615867	-1.10811	-1.21057	-1.20627	-0.790594	-0.76653	-0.436646	-1.03861	-1.3051	-1.03596	-1.58567	-1.60398	-1.02594	-1.00145	NaN	-1.5051	-1.57428	-0.963278	-1.164	NaN	-1.73379	-1.63509	-1.85419	-1.87762	-0.654496	-1.17761	-1.2865	-1.28193	-0.814609	-1.70458	-1.09029	-1.06426	NaN	-1.5995	-1.23701	-1.66448	-1.56973	-1.78007	-1.80257	-1.13054	-1.23508	-0.782048	-1.61777
NaN	0.791968	1.00332	0.591863	1.17799	-0.468282	0.935481	1.32419	0.28261	1.02996	0.787236	0.824661	1.0711	1.83345	1.55625	1.0357	0.979762	1.18402	NaN	1.42337	1.0713	NaN	0.620441	-0.8552	1.46367	1.19718	NaN	0.979439	0.577776	-0.497654	0.913216	1.29267	0.275884	1.00544	0.768499	1.0456	NaN	1.3895	1.0458	NaN	0.605674	1.16869	1.07005	0.631226	-0.477762	0.997697	0.301406	1.09846	1.14233	1.26277
NaN	1.61575	NaN	0.330653	NaN	0.360949	1.05488	2.41941	-0.395507	0.882937	1.47076	1.2756	0.982973	0.877471	0.301152	1.65557	NaN	NaN	NaN	NaN	1.10749	NaN	0.420483	1.4448	1.49204	-0.401737	NaN	NaN	0.322783	0.352358	1.02977	2.36182	-0.420315	0.861922	1.43575	0.959577	NaN	NaN	1.08113	NaN	0.410475	-0.426936	NaN	0.352644	0.384955	1.12503	-0.403514	0.941658	1.04835	NaN
-1.97099	-1.50607	-1.0846	-1.48759	-1.45077	-0.878426	-1.04426	-1.88	-1.76084	-1.4627	-1.52242	-2.11613	-2.06906	-2.27134	-2.36377	-1.44164	-1.40845	-1.78103	-1.26604	-1.84922	-1.62864	-1.8668	-0.550442	-2.16926	-1.44352	-1.85227	-2.09462	-1.15263	-1.5809	-0.933524	-1.10976	-1.99792	-1.87128	-1.55444	-1.61791	-2.19884	-1.34545	-1.96521	-1.73079	-1.98389	-0.584967	-1.96845	-1.10656	-1.51771	-0.896209	-1.0654	-1.79648	-1.49231	-2.11095	-1.81709
NaN	-2.438	-2.90301	NaN	-2.62003	-2.9025	-2.06549	NaN	-1.63157	-3.7241	-2.72007	-0.0518255	-2.87254	-1.14243	-2.63208	-1.61245	-2.42925	-2.27658	NaN	-2.31849	-3.38747	NaN	-2.45316	-2.19013	-1.80563	-2.23046	NaN	-3.08509	NaN	-3.08456	-2.19505	NaN	-1.73391	-3.95769	-2.89069	-3.05272	NaN	-2.46391	-3.59994	NaN	-2.60703	-2.37037	-2.96178	NaN	-2.96126	-2.10731	-1.6646	-3.79949	-2.93069	-2.32267
NaN	1.55941	1.46156	0.424158	1.58065	-1.70824	0.965854	1.91827	-0.189149	1.04429	1.0262	0.51141	1.35371	1.92607	0.835899	-0.25331	0.644636	1.58966	1.42721	1.13903	1.01456	1.55246	-0.753809	-0.125184	1.34337	0.955049	NaN	1.42677	0.414062	-1.81539	0.942865	1.87262	-0.201013	1.01944	1.00177	1.32149	1.39324	1.11192	0.990411	1.51551	-0.801091	0.932317	1.55877	0.452367	-1.74283	1.03009	-0.192978	1.11375	1.44374	1.69538
NaN	1.76005	2.27026	NaN	2.27225	1.93257	1.85016	0.311404	1.34356	0.726385	1.83178	1.00425	1.25511	1.07536	1.90783	2.06856	1.42224	0.940172	2.00754	1.00636	1.11334	0.694679	0.90073	1.7313	1.61523	1.2783	NaN	2.21622	NaN	1.88657	1.80613	0.303992	1.31158	0.709096	1.78818	1.22524	1.95976	0.982402	1.08684	0.678145	0.879292	1.24787	2.42125	NaN	2.0611	1.97321	1.43292	0.774695	1.33858	1.0027
0.819536	1.05002	NaN	0.376809	2.09901	2.09097	1.80788	0.0673475	2.0029	0.173801	1.80577	0.629863	0.753163	0.800149	NaN	2.25535	2.68237	0.597539	1.01053	0.338293	0.910363	NaN	0.687569	1.60888	NaN	1.8199	0.80003	NaN	0.367841	2.0412	1.76485	0.0657445	1.95522	0.169665	1.76279	0.735236	0.986481	0.330241	0.888695	NaN	0.671204	1.77658	NaN	0.40187	2.23003	1.92812	2.1361	0.18536	0.803253	0.63728
NaN	-1.4076	NaN	NaN	-1.36384	-1.91791	NaN	-0.564237	-2.40941	-0.678512	-1.25044	-0.484185	-0.763104	-0.582448	-1.51894	-2.30533	NaN	-1.1957	NaN	-0.0948093	NaN	-1.28157	NaN	-2.19252	NaN	NaN	NaN	NaN	NaN	-2.03821	NaN	-0.599628	-2.56054	-0.721071	-1.32887	-0.810968	NaN	-0.100756	NaN	-1.36195	NaN	NaN	NaN	NaN	-1.95673	NaN	-2.45819	-0.692248	-0.778552	-1.2199
-0.272703	0.432741	-1.17528	-0.422061	-0.014479	-0.811859	-0.614093	0.69464	-0.0817522	0.393571	-0.525118	-0.24448	0.43057	0.184026	-0.195021	-0.107612	-0.843489	0.611412	NaN	0.534405	0.252335	0.0309538	-0.0690646	-0.343248	-0.413125	0.059596	-0.289808	-1.249	-0.448534	-0.862781	-0.652611	0.678106	-0.0868799	0.384203	-0.558055	0.420322	NaN	0.521685	0.246329	0.0302171	-0.0733965	0.0581776	-1.19907	-0.430606	-0.828294	-0.626525	-0.0834071	0.419746	0.459206	0.652076
NaN	-0.343847	-0.645472	-0.831976	-0.230418	-0.0335091	NaN	-0.0808336	0.0959275	-1.10905	0.0800306	0.6169	-0.638172	0.111433	-0.182996	0.327609	0.901106	-0.925972	NaN	-0.692178	-2.00395	0.0697501	NaN	0.21453	NaN	-0.0794521	NaN	-0.685958	-0.88416	-0.0356109	NaN	-0.0859037	0.0936443	-1.17862	0.0781258	-0.678201	NaN	-0.735593	-2.12965	0.0680899	NaN	-0.0844355	-0.658539	-0.848818	-0.0341875	NaN	0.102307	-1.1315	-0.651092	-0.944718
NaN	NaN	0.481634	-0.509063	0.340227	NaN	0.0254689	-0.135692	-0.0506461	-0.802607	0.291897	0.12298	-0.495153	-0.0907196	0.215598	0.15535	NaN	NaN	-0.739991	0.0536523	-0.446896	-1.18555	-0.139487	-0.16414	0.202473	NaN	NaN	0.47017	-0.540993	NaN	0.0248627	-0.144203	-0.0538228	-0.852949	0.284949	-0.526211	-0.786406	0.0523753	-0.474926	-1.25991	-0.148236	NaN	0.513666	-0.519369	NaN	0.0271628	-0.0516714	-0.818855	-0.505177	NaN
NaN	2.78577	NaN	3.19541	2.6702	2.08229	-0.733567	2.24941	2.28307	1.83986	3.01847	1.91926	2.14547	3.08294	2.57089	-0.0841994	1.77256	2.35184	NaN	3.11922	1.94273	3.44039	2.70996	-0.30949	1.30643	2.55593	NaN	NaN	3.11935	2.03273	-0.779579	2.19587	2.22873	1.79607	2.94662	2.0944	NaN	3.04498	1.89649	3.35851	2.64546	2.49509	NaN	3.40792	2.22078	-0.748417	2.43491	1.96223	2.28816	2.50825
NaN	-0.345283	-0.11442	-0.263352	-0.0822255	0.223683	-0.166188	-0.219022	-0.222397	-0.187666	-0.0394207	0.0404727	-0.140777	-0.32792	-0.284272	-0.291765	NaN	NaN	NaN	-0.17563	-0.282368	NaN	-0.0884462	0.0599309	NaN	NaN	NaN	-0.121597	-0.27987	0.218359	-0.176612	-0.232759	-0.236347	-0.199437	-0.0418933	-0.149607	NaN	-0.186646	-0.300079	NaN	-0.0939938	NaN	-0.116737	-0.268683	0.238559	-0.169553	-0.2269	-0.191465	-0.143627	NaN
NaN	-0.0241575	0.0267459	0.0148035	-0.13553	0.00887594	-0.0761784	-0.127915	0.0162575	0.0641101	0.0658849	-0.0190392	-0.0825949	0.033984	0.0414218	0.0388002	0.231384	0.0143761	0.867059	-0.143409	-0.0761419	0.106239	0.254338	-0.0327309	0.292231	-0.0140397	NaN	0.0261093	0.0144511	0.00866468	-0.0809565	-0.135939	0.0158705	0.0625842	0.0643167	-0.0877755	0.846422	-0.152404	-0.0809178	0.10371	0.248285	-0.0149203	0.0285247	0.015788	0.00946625	-0.0777205	0.0173387	0.0683739	-0.084267	0.0153322
NaN	0.864594	-0.0600263	0.218105	0.898562	-0.39462	0.880838	0.358234	0.604664	0.459587	0.282136	0.428978	1.15062	0.959328	0.684202	0.360511	0.387097	0.731286	NaN	0.874054	NaN	NaN	0.141849	0.718044	0.414269	0.944147	NaN	-0.0637913	0.212914	-0.419372	0.859873	0.349708	0.590272	0.448648	0.275421	1.12323	NaN	0.85325	NaN	NaN	0.138473	0.921675	-0.0612414	0.232611	-0.402609	0.93942	0.644878	0.490152	1.22715	0.779921
NaN	0.339014	-0.828578	-0.209352	-0.183895	NaN	-0.154391	0.673362	-0.819986	0.465756	0.249831	0.434613	NaN	0.373001	-0.16737	-0.332364	NaN	0.906138	NaN	0.572699	0.226183	NaN	NaN	-0.046621	NaN	-0.222214	NaN	-0.880549	-0.222484	NaN	-0.164075	0.657335	-0.871418	0.454671	0.243884	NaN	NaN	0.559068	0.2208	NaN	NaN	-0.236152	-0.845352	-0.213591	NaN	-0.157517	-0.836586	0.496732	NaN	0.966402
NaN	0.258391	-0.839036	-0.227552	-0.0717183	-1.1116	-0.833663	0.689126	-0.326716	0.0777035	-0.0751253	0.348251	0.028403	0.18774	-0.0530293	0.180718	-0.558807	0.217883	-0.904872	0.167899	0.139977	-0.118319	-0.605348	-1.0977	-0.327719	-0.418003	NaN	-0.891663	-0.241825	-1.18132	-0.885953	0.672724	-0.347208	0.075854	-0.0798374	0.027727	-0.961628	0.163903	0.136645	-0.12574	-0.643317	-0.444221	-0.856022	-0.232159	-1.1341	-0.85054	-0.33333	0.0828713	0.030292	0.232374
NaN	-0.75612	-0.61551	NaN	-1.14264	-0.226352	NaN	-0.307954	-0.371707	-0.496866	-0.293644	-0.992513	-0.638752	-0.77282	-1.36707	-0.353432	NaN	-0.69025	-0.14595	-0.565479	-0.662545	-0.598453	-0.0341603	-0.505838	-0.528985	-0.681986	NaN	-0.654116	NaN	-0.240549	NaN	-0.32727	-0.395022	-0.528031	-0.312062	-0.678817	-0.155104	-0.600947	-0.704102	-0.63599	-0.0363029	-0.724763	-0.62797	NaN	-0.230934	NaN	-0.379232	-0.506924	-0.651683	-0.704224
NaN	-1.15444	-1.7845	-1.06365	-0.606751	-1.97242	-1.27762	0.0186897	-1.07043	0.512339	-0.798761	1.5123	0.696118	0.861525	-1.37747	-2.55248	-1.24588	0.36509	-2.16917	0.935648	0.293752	NaN	-0.154732	-0.623798	-1.51779	0.522622	NaN	-1.89642	-1.13036	-2.09614	-1.35775	0.0182449	-1.13757	0.500145	-0.848862	0.679549	-2.30523	0.913379	0.28676	NaN	-0.164437	0.510183	-1.82062	-1.08518	-2.01235	-1.30348	-1.0921	0.546413	0.742415	0.389371
NaN	-1.19167	-2.66609	NaN	-0.576652	-2.37256	NaN	NaN	NaN	-1.12609	NaN	0.140251	-1.07344	-0.339263	-0.492053	-2.19736	-3.07515	-0.475668	-1.43239	-0.303603	-0.911866	-1.24875	-1.81804	-2.77709	NaN	NaN	NaN	-2.83332	NaN	-2.52138	NaN	NaN	NaN	-1.19672	NaN	-1.14077	-1.52223	-0.322646	-0.969061	-1.32707	-1.93207	NaN	-2.72006	NaN	-2.4206	NaN	NaN	-1.14888	-1.09517	-0.485298
NaN	-0.511036	-0.688473	-0.0975053	0.39744	-0.174064	NaN	0.196888	0.119973	-0.267442	-0.269881	-0.0877742	0.0777568	0.206073	-0.641541	-0.559091	NaN	0.0308769	NaN	-0.100418	-0.211357	NaN	-0.115709	0.439079	NaN	-0.11329	NaN	-0.731656	-0.103621	-0.184982	NaN	0.192201	0.117117	-0.284217	-0.286809	0.075906	NaN	-0.106717	-0.224614	NaN	-0.122967	-0.120396	-0.70241	-0.0994792	-0.177588	NaN	0.127952	-0.272857	0.0829281	0.0329304
NaN	-0.509168	-0.824626	-0.875903	0.453881	-0.112877	-0.0816053	0.200214	0.0132213	-0.608156	-0.405318	0.247826	-0.937671	0.327395	-0.592423	-0.918166	NaN	0.123228	NaN	0.301069	NaN	0.150801	-0.0652642	-0.123338	NaN	0.0998481	NaN	-0.876349	-0.930843	-0.119957	-0.0867239	0.195448	0.0129066	-0.646302	-0.43074	-0.996485	NaN	0.293903	NaN	0.147211	-0.0693578	0.0974715	-0.84132	-0.893635	-0.115162	-0.0832574	0.0141006	-0.620468	-0.956654	0.131424
NaN	-1.37192	-2.35492	NaN	-3.35634	-2.09974	-4.85564	-3.35978	-2.12004	-3.6369	-6.20562	-3.441	-2.586	-3.49943	-1.59312	-2.41596	-2.89535	-5.60561	NaN	-2.316	-2.56336	-2.26206	-2.00661	-2.26035	NaN	-3.79188	NaN	-2.50262	NaN	-2.23145	-5.1602	-3.57052	-2.25301	-3.86502	-6.59485	-2.74821	NaN	-2.46127	-2.72414	-2.40394	-2.13247	-4.02972	-2.40259	NaN	-2.14225	-4.95394	-2.16296	-3.71052	-2.63835	-5.71909
-0.549374	-1.63081	-1.12268	-0.742008	-0.282736	-1.41585	-0.685482	-0.500621	-1.68816	-0.462735	-1.19613	-0.566473	-0.803326	-0.948983	-1.55387	-1.89312	-1.51441	-1.15183	0.397717	-0.581281	-0.232234	-0.40304	-1.21818	-0.96053	0.36111	-1.18439	-0.583833	-1.1931	-0.788549	-1.50466	-0.728477	-0.532021	-1.79405	-0.491759	-1.27116	-0.853713	0.388251	-0.617741	-0.2468	-0.42832	-1.29459	-1.25867	-1.14541	-0.757029	-1.44451	-0.699359	-1.72234	-0.472102	-0.819588	-1.17515
-0.896329	-0.944137	-3.24069	-3.5974	-1.33876	-1.64852	-3.54772	-2.22235	-2.47114	-2.71687	-3.88356	-1.28303	-1.22686	-1.71957	-1.34483	-1.57795	-2.7432	-4.10432	NaN	-0.943992	-1.49719	-2.39615	-1.3643	-2.09277	-3.2519	-2.65179	-0.95255	-3.44395	-3.82304	-1.75192	-3.77024	-2.36174	-2.62613	-2.88728	-4.12715	-1.30381	NaN	-1.0032	-1.59109	-2.54645	-1.44988	-2.81812	-3.30629	-3.67022	-1.68189	-3.61954	-2.52116	-2.77187	-1.2517	-4.18741
NaN	-1.84226	-1.77717	NaN	-2.21273	NaN	NaN	-0.875581	-0.105687	-0.649081	-1.72757	-1.19167	0.142815	-0.707194	-2.5661	-2.25728	NaN	-0.446372	NaN	-0.847104	-1.12327	NaN	-0.0884462	-0.849198	NaN	-1.37758	NaN	-1.88864	NaN	NaN	NaN	-0.930501	-0.112316	-0.689793	-1.83592	0.139416	NaN	-0.900237	-1.19373	NaN	-0.0939938	-1.46398	-1.81315	NaN	NaN	NaN	-0.107827	-0.662221	0.152314	-0.455408
NaN	1.65656	0.607666	0.628823	0.915946	-1.28208	NaN	2.24406	0.167361	1.67402	1.5181	1.97804	1.51315	2.14536	0.907105	0.983196	NaN	1.57565	NaN	1.29144	1.7678	NaN	0.297424	0.735701	NaN	2.2334	NaN	0.593202	0.613856	-1.36249	NaN	2.19064	0.163378	1.63417	1.48196	1.47714	NaN	1.2607	1.72573	NaN	0.290345	2.18024	0.64808	0.670644	-1.30803	NaN	0.178492	1.78535	1.61379	1.68044
NaN	1.57692	0.325343	NaN	0.567031	-0.511072	0.67727	1.63296	0.645647	1.22902	1.23507	2.16149	1.74369	1.61158	0.921526	-0.0766002	0.710182	1.72651	2.20729	1.89278	1.29742	1.79644	0.66236	0.756613	2.28269	1.56862	NaN	0.3176	NaN	-0.543128	0.66115	1.59409	0.63028	1.19976	1.20568	1.70219	2.15475	1.84773	1.26654	1.75369	0.646595	1.53129	0.346981	NaN	-0.521418	0.722314	0.688588	1.31075	1.85966	1.84134
NaN	0.327691	-1.36207	-0.719247	-0.61434	-1.97743	-1.92882	-0.0779	-1.69203	0.170151	-2.17978	-1.04836	-0.342367	-1.93469	0.199132	-0.838404	-1.58587	-0.408358	-1.88842	-0.499347	0.109384	0.376145	-0.832307	NaN	0.158496	-0.741015	NaN	-1.4475	-0.76436	-2.10146	-2.04981	-0.0827861	-1.79816	0.166101	-2.3165	-0.363841	-2.00687	-0.530668	0.106781	0.367192	-0.884511	-0.787494	-1.38964	-0.733807	-2.01746	-1.96787	-1.72628	0.181467	-0.349298	-0.416625
NaN	NaN	-0.815415	NaN	2.46502	-0.79674	0.360304	1.47838	NaN	1.03828	-0.16001	NaN	NaN	NaN	NaN	-1.46827	-0.785891	NaN	0.163461	NaN	1.70797	0.491573	0.0489789	-0.126909	0.326708	0.278163	NaN	-0.86656	NaN	-0.846714	0.351728	1.44319	NaN	1.01357	-0.170047	NaN	0.15957	NaN	1.66731	0.479873	0.0478131	0.271542	-0.831922	NaN	-0.812869	0.384267	NaN	1.10734	NaN	NaN
NaN	0.273295	0.940351	0.645153	1.03257	1.07303	0.461172	0.256516	1.49978	0.35884	0.898476	0.888949	0.967827	0.342089	0.760401	1.22956	NaN	0.468357	0.340348	0.315163	0.43057	NaN	0.752281	1.31914	0.906357	0.75279	NaN	0.91797	0.629798	1.0475	0.450196	0.25041	1.46408	0.350299	0.877091	0.944792	0.332247	0.307662	0.420322	NaN	0.734375	0.734873	1.00289	0.68806	1.1444	0.491844	1.59953	0.382705	1.03219	0.499506
NaN	-0.843376	NaN	-0.103502	0.287347	1.14881	0.119925	-0.467853	0.583307	-0.187394	NaN	0.493089	-0.296499	0.125906	-0.398431	0.3376	NaN	-0.27278	NaN	0.086098	-0.404222	0.210939	-0.163622	0.350413	NaN	-0.00698274	NaN	NaN	-0.109994	1.12146	0.117071	-0.497198	0.569424	-0.199148	NaN	-0.315097	NaN	0.0840487	-0.429576	0.205919	-0.173885	-0.00742072	NaN	-0.105597	1.22521	0.127901	0.622101	-0.191187	-0.302502	-0.278302
NaN	0.635753	1.38995	0.960413	1.42827	1.35893	1.06525	0.636864	1.39305	0.441193	1.32876	1.37759	1.06974	1.02903	1.08478	1.00896	1.44898	0.781698	NaN	NaN	0.785996	0.85229	NaN	1.84415	0.974622	1.22055	NaN	1.35687	0.937554	1.32658	1.0399	0.621706	1.35989	0.430692	1.29713	1.04428	NaN	NaN	0.767288	0.832004	NaN	1.1915	1.4824	1.02429	1.44931	1.1361	1.48569	0.470536	1.14088	0.833686
NaN	0.593453	1.21649	0.604729	1.39076	NaN	NaN	0.534341	1.25342	0.610382	1.31506	0.922764	1.0849	0.531125	0.740838	0.972393	NaN	0.591793	NaN	0.324154	NaN	NaN	0.993805	1.5153	NaN	0.776714	NaN	1.18754	0.590336	NaN	NaN	0.521623	1.22359	0.595854	1.28376	1.05908	NaN	0.316438	NaN	NaN	0.970151	0.758228	1.2974	0.644948	NaN	NaN	1.33678	0.650977	1.15705	0.631152
NaN	0.452381	1.02295	0.494834	1.00272	1.36388	1.50972	0.338642	0.946478	0.370803	0.823024	1.0477	0.756007	0.331376	0.444359	0.64776	0.209697	0.570216	NaN	0.707932	0.689703	0.702308	0.797338	1.29834	0.941079	0.717795	NaN	0.998603	0.483056	1.33142	1.47378	0.330582	0.92395	0.361977	0.803435	0.738013	NaN	0.691083	0.673287	0.685592	0.77836	0.700711	1.09098	0.527744	1.45459	1.61012	1.00943	0.395464	0.806287	0.60814
-0.860566	-0.637925	-1.79394	-2.95474	-1.62566	-2.70762	-2.0812	-0.672864	-2.88696	-0.992058	-1.41706	-0.941088	-0.548645	-0.217277	-1.1707	-1.99239	-2.39693	-0.532866	-2.6397	-0.527779	-0.48079	-1.52304	-2.96494	-3.57348	-1.39257	-1.34532	-0.914543	-1.90646	-3.14007	-2.87745	-2.21174	-0.715068	-3.06804	-1.05428	-1.50594	-0.583057	-2.80527	-0.560883	-0.510947	-1.61857	-3.15091	-1.42971	-1.83025	-3.01456	-2.76244	-2.12333	-2.94541	-1.01214	-0.559752	-0.543653
NaN	-0.680495	-0.891031	-0.453229	-0.28729	0.317518	0.0681658	-0.594692	-0.558942	-0.445174	-0.112053	-0.212615	-0.407983	-0.588997	-0.36655	-0.370392	-0.397924	-0.585921	-0.388549	-0.732613	-0.497264	NaN	-0.349014	-0.543863	-0.314824	-0.470904	NaN	-0.946919	-0.481657	0.309961	0.0665434	-0.631993	-0.594001	-0.473097	-0.119081	-0.433573	-0.41292	-0.778565	-0.528454	NaN	-0.370905	-0.50044	-0.909069	-0.462404	0.338635	0.0726994	-0.570257	-0.454186	-0.416242	-0.597783
NaN	0.0380742	-1.46002	-1.4703	-0.750144	-1.3371	NaN	0.434005	-1.25611	-0.104034	-0.697134	0.161057	-0.26033	0.418588	-0.591378	-0.925283	-0.704638	-0.236662	0.526331	0.165306	NaN	NaN	-0.830978	-1.61248	-0.253498	-1.36509	NaN	-1.5516	-1.56252	-1.42096	NaN	0.423675	-1.3349	-0.110559	-0.74086	-0.276659	0.513803	0.161371	NaN	NaN	-0.8831	-1.45071	-1.48958	-1.50007	-1.36416	NaN	-1.28154	-0.10614	-0.265601	-0.241453
NaN	-0.486918	-0.358171	-0.690246	-0.359614	-0.11755	NaN	-0.636097	0.0662452	-0.387805	-0.195507	-0.432197	-0.52791	-0.311709	-0.455156	-0.224087	-0.00784231	-0.633172	0.0469554	-0.711374	-0.750573	-0.606387	-0.282555	-0.37713	-0.904289	-0.642055	NaN	-0.380637	-0.733541	-0.124923	NaN	-0.675995	0.0646684	-0.41213	-0.20777	-0.561023	0.0458378	-0.755994	-0.797652	-0.644422	-0.300278	-0.682327	-0.365422	-0.70422	-0.11993	NaN	0.0706509	-0.395656	-0.538597	-0.64599
NaN	NaN	1.61176	1.52847	0.900669	1.56383	1.07932	1.20863	2.30973	0.675925	0.754733	0.743984	0.927686	0.669177	0.576516	0.704292	2.11675	NaN	1.85548	0.531544	1.11444	NaN	2.03137	1.36819	NaN	1.94952	NaN	1.5734	1.49209	1.52661	1.05363	1.17986	2.25475	0.659837	0.736769	0.905606	1.81132	0.518893	1.08792	NaN	1.98302	1.90312	1.71896	1.63012	1.66784	1.1511	2.46334	0.720879	0.989384	NaN
NaN	0.150933	1.47555	0.117638	-0.171189	0.767596	0.673607	NaN	0.669692	0.536591	0.615671	NaN	-0.0322759	0.518557	NaN	0.528638	0.0390768	0.149289	NaN	-0.133904	NaN	NaN	1.18537	0.517809	3.22754	0.224852	NaN	1.44043	0.114838	0.749326	0.657574	NaN	0.653752	0.52382	0.601017	-0.0343004	NaN	-0.142303	NaN	NaN	1.15716	0.219501	1.57368	0.125461	0.818646	0.718406	0.714231	0.572278	-0.0329293	0.159217
NaN	-0.516162	NaN	-0.47402	0.149336	NaN	NaN	-0.528455	-0.309735	-0.193773	-0.452046	-0.168972	0.0585031	0.32584	0.35217	0.085838	0.267486	0.00490029	-0.154077	-0.683721	-0.329383	-0.818749	-0.406705	0.524641	-0.538073	-1.13943	NaN	NaN	-0.503752	NaN	NaN	-0.561601	-0.329162	-0.205927	-0.4804	0.0571106	-0.163742	-0.726606	-0.350043	-0.870104	-0.432215	-1.2109	NaN	-0.483616	NaN	NaN	-0.316005	-0.197696	0.062394	0.0052262
0.322117	0.473711	0.859734	0.114386	0.125391	1.53202	0.198439	0.017234	0.466871	0.202881	0.437451	-0.127296	0.878328	0.00583051	0.599055	0.679602	0.97973	0.0560483	0.409015	-0.13959	0.322531	-0.0760176	1.22715	0.669327	0.601752	0.549669	0.31445	0.839271	0.111663	1.49555	0.193715	0.0168238	0.455759	0.198052	0.427039	0.857423	0.399279	-0.148346	0.314854	-0.0807857	1.19794	0.536586	0.916913	0.121993	1.63391	0.211636	0.497921	0.216374	0.936743	0.0597759
NaN	0.051778	-0.152867	1.42288	1.09554	2.42548	2.44786	0.76771	NaN	0.823905	1.5265	1.28351	1.21887	0.74677	0.745798	-0.541874	2.41501	0.734561	0.837825	0.630064	1.26265	1.61895	1.87166	2.61384	1.94594	1.42975	NaN	-0.162455	1.38901	2.36775	2.3896	0.749437	NaN	0.804295	1.49016	1.18986	0.817884	0.615068	1.2326	1.58041	1.82711	1.39572	-0.155962	1.51751	2.5868	2.61066	NaN	0.8787	1.29993	0.783414
0.0383206	-0.284569	0.756141	0.274541	0.14937	0.0305627	0.62075	0.168324	0.891318	0.681687	-0.0639867	0.497358	0.685192	-0.160746	-0.607106	-0.591886	-0.212178	0.409554	0.241885	-0.146519	0.480135	0.371127	0.694818	-0.28098	-1.03547	0.24755	0.0374085	0.738144	0.268007	0.0298353	0.605975	0.164318	0.870103	0.665462	-0.0680002	0.668883	0.236128	-0.155709	0.468707	0.362293	0.67828	0.241658	0.80643	0.2928	0.0325954	0.662034	0.950596	0.727024	0.730762	0.436792
NaN	1.7565	0.583473	1.81597	-0.306107	-0.7997	0.475111	2.56462	0.396364	NaN	2.42566	0.812605	2.37276	NaN	2.4413	1.61893	NaN	1.59937	NaN	NaN	NaN	NaN	NaN	NaN	NaN	NaN	NaN	0.569585	1.77274	-0.849859	0.463803	2.50358	0.38693	NaN	2.36793	2.31629	NaN	NaN	NaN	NaN	NaN	NaN	0.622278	1.93674	-0.815889	0.50671	0.422725	NaN	2.53057	1.70574
0.848243	0.0461747	NaN	-0.544087	0.441741	1.37801	0.332661	-0.677231	-0.124061	-0.175066	1.31139	-0.682397	-0.220011	-0.37798	0.61918	0.67078	0.230019	-0.541917	NaN	-0.371212	0.0453773	-0.527262	0.446802	0.478933	0.439887	0.969726	0.828054	NaN	-0.578214	1.34521	0.324743	-0.719709	-0.131843	-0.186046	1.28018	-0.23381	NaN	-0.394495	0.0442973	-0.560333	0.436168	0.946645	NaN	-0.555102	1.46966	0.354786	-0.126573	-0.17861	-0.224465	-0.552887
NaN	-0.212879	NaN	NaN	0.0854899	1.06275	NaN	NaN	NaN	-0.526243	0.499087	-0.888942	-0.600875	-1.0108	-0.163004	-0.0627722	-0.186287	-1.12986	NaN	-0.811068	-0.45204	NaN	-0.198746	0.0793512	NaN	NaN	NaN	NaN	NaN	1.03746	NaN	NaN	NaN	-0.55925	0.487208	-0.638564	NaN	-0.861941	-0.480393	NaN	-0.211212	NaN	NaN	NaN	1.13344	NaN	NaN	-0.536896	-0.613039	-1.15273
NaN	-0.408625	NaN	NaN	-0.0436716	-0.092953	NaN	-0.628809	-1.31003	-0.846812	-0.575674	-0.334387	NaN	-0.25406	-0.621403	-0.49479	NaN	-0.646091	NaN	-0.453553	NaN	NaN	-0.685872	-0.200498	-0.9122	-0.644048	NaN	NaN	NaN	-0.0987834	NaN	-0.66825	-1.3922	-0.899927	-0.611782	NaN	NaN	-0.482001	NaN	NaN	-0.728892	-0.684445	NaN	NaN	-0.0948348	NaN	-1.33655	-0.863955	NaN	-0.659171
-1.29588	-0.674965	-1.76469	-0.63822	-0.770813	-0.368308	-0.915079	-0.671602	-1.30286	-1.16338	-0.830841	-0.611615	-2.02055	-0.291126	-0.91571	-0.801765	-0.835831	-2.14917	-0.553945	-0.628198	-0.428677	-0.468273	-0.556174	-0.730462	-2.28382	-1.31384	-1.37716	-1.87537	-0.678251	-0.39141	-0.972476	-0.713727	-1.38458	-1.23636	-0.882954	-2.14728	-0.58869	-0.667601	-0.455565	-0.497645	-0.591059	-1.39625	-1.80041	-0.65114	-0.375764	-0.933604	-1.32923	-1.18694	-2.06145	-2.19268
-0.947578	-0.382262	-1.78722	-0.951552	-0.610972	-0.384679	-1.02733	-0.485555	-1.27162	-1.10143	-0.722317	-0.747548	-0.937479	-0.458465	-0.983154	-1.00925	-0.605527	-1.04628	-0.527505	-0.772682	-0.740916	-1.00438	-0.908811	-0.735686	-0.716363	-1.0507	-1.00701	-1.89932	-1.01124	-0.408807	-1.09177	-0.51601	-1.35138	-1.17051	-0.767623	-0.996281	-0.560592	-0.821148	-0.787388	-1.06738	-0.965815	-1.1166	-1.8234	-0.970816	-0.392466	-1.04813	-1.29736	-1.12373	-0.956458	-1.06746
0.562028	0.172895	0.588335	0.633914	1.16742	0.679424	-0.266486	0.362244	0.177086	0.0732018	0.0193611	0.183399	0.185294	0.464083	1.09777	0.449185	1.42277	0.173809	1.01146	0.0895499	0.369458	0.567959	0.045614	0.493	1.38766	0.908621	0.548651	0.574332	0.618826	0.663253	-0.283201	0.353622	0.172871	0.0714595	0.0189003	0.180883	0.987384	0.0874185	0.360664	0.554441	0.0445284	0.886995	0.627464	0.676073	0.72461	-0.271881	0.188864	0.0780702	0.197617	0.185368
NaN	3.39531	NaN	4.04522	NaN	NaN	6.94354	2.205	4.34505	3.10968	4.69707	1.70107	4.34354	6.62032	5.05456	3.06299	4.30015	3.25185	NaN	5.47573	NaN	5.60288	6.36048	2.64591	3.56837	NaN	NaN	NaN	3.94894	NaN	6.77827	2.15252	4.24163	3.03567	4.58527	4.24016	NaN	5.3454	NaN	5.46952	6.20909	NaN	NaN	4.31426	NaN	7.40533	4.63402	3.3165	4.63242	3.46812
NaN	0.523757	-0.91981	-0.122122	-0.821163	-2.04944	-0.635014	0.828741	-0.287475	0.56839	-0.431706	0.854344	0.949915	0.506233	0.472434	-0.817967	0.671375	0.83436	NaN	0.826157	0.365567	0.329611	-0.500632	0.663963	-0.333265	0.333095	NaN	-0.977504	-0.129782	-2.17798	-0.674844	0.809016	-0.305507	0.554862	-0.458784	0.927306	NaN	0.806494	0.356866	0.321766	-0.532033	0.325167	-0.938431	-0.124594	-2.09093	-0.647869	-0.293295	0.606192	1.01309	0.88985
NaN	0.234726	NaN	NaN	-0.674751	-1.3772	-0.57071	0.28307	-1.08744	-0.412129	-0.866377	1.37635	0.0871743	-0.0379854	-0.234251	-0.830657	-0.71221	0.283726	-0.717122	0.160583	-0.182828	0.152109	-0.917138	-1.47248	-0.866396	-0.436043	NaN	NaN	NaN	-1.46358	-0.606507	0.276333	-1.15564	-0.437979	-0.920718	0.0850994	-0.762102	0.156761	-0.194295	0.148489	-0.974664	-0.463393	NaN	NaN	-1.40508	-0.582264	-1.10945	-0.420472	0.092972	0.302596
NaN	-1.95211	-3.53192	NaN	NaN	-2.13951	NaN	-1.09745	-3.08559	-1.91341	-2.45362	0.334749	NaN	-2.38212	-2.79117	-2.8038	-4.33471	NaN	NaN	-1.23747	-1.90433	NaN	-3.19003	-3.27255	NaN	-2.38055	NaN	-3.75345	NaN	-2.27371	NaN	-1.16628	-3.27913	-2.03343	-2.60752	NaN	NaN	-1.31509	-2.02378	NaN	-3.39012	-2.52987	-3.60342	NaN	-2.18282	NaN	-3.14805	-1.95215	NaN	NaN
NaN	0.965475	1.57513	NaN	NaN	NaN	1.82933	0.552557	1.79912	0.830949	0.319667	NaN	1.0513	0.731318	0.421438	1.1879	0.912275	0.627981	NaN	0.0989456	NaN	0.860343	1.79126	0.832116	0.619076	NaN	NaN	1.53764	NaN	NaN	1.78579	0.539405	1.7563	0.811171	0.312059	1.02627	NaN	0.0965905	NaN	0.839865	1.74862	NaN	1.67988	NaN	NaN	1.95099	1.91877	0.886213	1.12121	0.669747
NaN	0.731833	NaN	0.796777	0.75391	1.11507	0.161192	0.782759	1.00959	0.593108	0.608114	0.456101	0.295281	0.447342	0.999741	1.08612	1.54816	0.368449	NaN	0.434945	0.738764	0.788997	0.798792	1.72274	1.64538	0.861938	NaN	NaN	0.777813	1.08853	0.157355	0.764128	0.985559	0.578991	0.593641	0.288253	NaN	0.424593	0.721181	0.770218	0.77978	0.841423	NaN	0.849768	1.18923	0.171912	1.07673	0.632554	0.31492	0.392954
NaN	0.160163	0.707931	-1.16972	-0.0746103	-0.0143576	NaN	0.0402146	0.011056	-0.678607	-0.118121	0.620778	0.12071	0.13657	0.0904128	0.164884	0.00243967	-0.0636739	0.0460058	-0.151109	0.0676909	-0.528932	-0.545838	0.230766	-0.162025	0.263989	NaN	0.691081	-1.24308	-0.0152581	NaN	0.0392575	0.0107929	-0.721171	-0.12553	0.117837	0.0449108	-0.160587	0.0660797	-0.562108	-0.580075	0.257705	0.755013	-1.1934	-0.0146482	NaN	0.0117914	-0.692345	0.128738	-0.064963
NaN	1.67132	0.77308	0.35014	1.3765	-0.830896	0.341085	1.7814	0.858244	0.889708	1.35648	1.39979	1.62081	NaN	1.33764	0.613444	2.20781	NaN	NaN	NaN	1.35273	NaN	0.450623	0.893553	NaN	0.73493	NaN	0.754679	0.341806	-0.883013	0.332967	1.739	0.837816	0.868532	1.3242	1.58224	NaN	NaN	1.32053	NaN	0.439897	0.717438	0.824495	0.373427	-0.847717	0.36377	0.915323	0.94888	1.72861	NaN
NaN	NaN	0.0573961	NaN	0.547004	-0.571355	0.606833	1.10679	NaN	0.643519	0.463454	0.18368	0.875159	NaN	1.19137	0.162429	NaN	0.819176	-0.476136	NaN	0.660281	0.580247	0.133641	0.633307	NaN	0.596373	NaN	0.0560299	NaN	-0.607192	0.59239	1.08045	NaN	0.628202	0.452424	0.854329	-0.506001	NaN	0.644565	0.566436	0.130461	0.582178	0.0612133	NaN	-0.582921	0.647192	NaN	0.686317	0.933363	0.873657
-0.314565	-0.821848	-0.292263	-0.994924	0.273429	-1.06574	NaN	-0.822848	-1.17783	-1.02465	-0.307405	0.712912	-0.738692	-0.718713	-1.11189	-1.18057	-0.787446	-0.501124	-1.21388	-0.0690277	-0.830386	-2.17041	-0.636917	-1.27608	NaN	-0.562112	-0.334296	-0.310595	-1.05733	-1.13258	NaN	-0.87446	-1.25171	-1.08892	-0.326687	-0.785025	-1.29002	-0.0733573	-0.882471	-2.30655	-0.676866	-0.59737	-0.29818	-1.01507	-1.08731	NaN	-1.20167	-1.0454	-0.753646	-0.511269
NaN	0.987843	0.553218	NaN	1.01588	NaN	-0.149251	1.00168	-0.0288517	1.00759	0.588495	0.463924	1.24506	NaN	0.971618	0.0839169	NaN	1.2437	NaN	-1.65328	1.09321	0.915189	0.0556122	0.0436466	NaN	0.707068	NaN	0.540051	NaN	NaN	-0.158612	0.977835	-0.0306614	0.983606	0.574488	1.21542	NaN	-1.75698	1.06719	0.893406	0.0542886	0.690239	0.590011	NaN	NaN	-0.152272	-0.0294358	1.0746	1.32786	1.32642
NaN	0.586402	1.07775	1.07845	0.604119	-0.146727	NaN	NaN	0.762981	NaN	-0.151768	0.612454	0.334401	0.475398	0.602728	0.228164	1.22577	NaN	0.599768	0.195064	NaN	0.579604	0.589202	0.511194	NaN	NaN	NaN	1.0521	1.05278	-0.15593	NaN	NaN	0.744821	NaN	-0.161287	0.326442	0.585493	0.190421	NaN	0.565808	0.575179	NaN	1.14942	1.15018	-0.149697	NaN	0.813725	NaN	0.356641	NaN
NaN	0.013183	0.505515	-0.00106168	0.336563	-0.475885	0.312766	-0.332333	0.00271787	-0.626607	-0.372302	0.136837	-0.238735	0.410655	-0.040737	0.247605	0.391008	-0.239415	-0.0105236	-0.267811	-0.408291	0.133504	0.14514	-0.324647	0.337138	0.143439	NaN	0.493483	-0.00112827	-0.505734	0.305321	-0.353178	0.00265318	-0.665909	-0.395654	-0.253709	-0.0111837	-0.284609	-0.433901	0.130327	0.141686	0.140025	0.539135	-0.00108317	-0.485519	0.333567	0.00289863	-0.639292	-0.243568	-0.244262
NaN	1.23334	1.58975	1.04481	0.896544	0.913039	0.851351	2.28948	-0.331911	0.971898	2.23631	0.981423	0.751755	0.81917	1.12818	1.06726	0.577466	0.996225	1.24114	0.732319	1.40031	1.37321	0.551989	2.05736	1.35364	0.931835	NaN	1.55192	1.01994	0.891308	0.831087	2.23499	-0.352729	0.948766	2.18309	0.733862	1.21159	0.714889	1.36698	1.34053	0.538851	0.909656	1.69548	1.1143	0.973763	0.907972	-0.33863	1.03654	0.801752	1.06248
NaN	-1.71879	-1.53736	NaN	NaN	-0.421936	-1.15162	-0.658316	-1.0556	NaN	-0.816164	-0.388242	-1.48703	NaN	-0.833363	-0.536299	NaN	-0.987578	-0.601058	NaN	-1.52853	NaN	-1.92212	-0.452454	NaN	NaN	NaN	-1.63379	NaN	-0.448401	-1.22385	-0.699607	-1.12181	NaN	-0.867356	-1.58031	-0.638758	NaN	-1.62441	NaN	-2.04269	NaN	-1.56848	NaN	-0.430477	-1.17493	-1.07697	NaN	-1.51714	-1.00757
NaN	0.281985	0.212567	NaN	0.0603867	NaN	NaN	NaN	0.0507064	0.754671	0.418698	NaN	0.0764677	-0.868508	0.207581	0.751401	NaN	NaN	NaN	-0.218706	NaN	0.177527	0.606354	0.461139	0.432929	NaN	NaN	0.207508	NaN	NaN	NaN	NaN	0.0494995	0.736709	0.408732	0.0746477	NaN	-0.232424	NaN	0.173302	0.591922	NaN	0.226704	NaN	NaN	NaN	0.0540787	0.804862	0.0815534	NaN
NaN	0.340862	NaN	0.0539094	-0.338989	-0.808121	-0.449929	0.548289	0.15937	0.291784	-0.625018	0.256214	-0.0304782	NaN	0.554405	0.192876	0.447168	0.532841	NaN	NaN	0.130412	NaN	0.0591839	NaN	NaN	NaN	NaN	NaN	0.0526262	-0.858809	-0.47815	0.535239	0.155576	0.284839	-0.664222	-0.0323899	NaN	NaN	0.127308	NaN	0.0577752	NaN	NaN	0.0574947	-0.824481	-0.459037	0.169969	0.31119	-0.0310952	0.568278
NaN	0.950014	2.09097	1.41267	0.662465	1.30204	2.85237	NaN	NaN	0.623846	1.64408	-0.562567	1.3211	0.385379	1.17993	1.51383	NaN	0.861463	0.214327	1.03069	1.08889	NaN	NaN	1.26938	1.35792	1.72841	NaN	2.0412	1.37905	1.27105	2.78448	NaN	NaN	0.608997	1.60494	1.28966	0.209225	1.00615	1.06297	NaN	NaN	1.68727	2.23003	1.50662	1.38864	3.04207	NaN	0.665336	1.40896	0.918757
-0.0449391	-0.475487	0.201615	-0.527078	-0.213625	0.545396	0.0264061	-0.788367	-0.87426	-0.461623	0.0262891	-0.833853	-0.794416	-0.388331	-0.121738	0.194233	0.192201	-0.354007	-0.0862241	-0.531254	-0.54265	-0.307157	-0.278133	-0.212749	-0.473201	-0.582722	-0.0477579	0.196817	-0.560138	0.532415	0.0257776	-0.837816	-0.929097	-0.490577	0.0256634	-0.844244	-0.0916324	-0.564576	-0.576687	-0.326423	-0.295579	-0.619272	0.215024	-0.537748	0.581669	0.0281622	-0.891959	-0.470968	-0.810498	-0.361173
NaN	NaN	NaN	NaN	-0.402975	NaN	-0.106899	NaN	-0.612772	-0.734804	-0.0191204	NaN	-0.851609	-0.726245	-0.676015	-0.342696	-0.464437	NaN	-0.305961	-0.558172	-0.593061	-0.909515	NaN	NaN	0.0482117	-0.600788	NaN	NaN	NaN	NaN	-0.113604	NaN	-0.651207	-0.780893	-0.0203197	-0.905024	-0.325152	-0.593183	-0.630259	-0.966563	NaN	-0.638472	NaN	NaN	NaN	-0.109063	-0.625177	-0.749679	-0.868849	NaN
NaN	0.16024	0.33429	0.301008	-0.772888	0.693862	0.160141	0.158505	0.823265	0.208016	0.444449	0.224945	0.187078	0.209793	-0.172786	NaN	0.254485	NaN	NaN	-0.32877	0.111017	-0.188442	0.518427	0.770807	NaN	0.396405	NaN	0.326333	0.293843	0.677347	0.156329	0.154733	0.80367	0.203065	0.43387	0.182625	NaN	-0.349392	0.108374	-0.200262	0.506087	0.38697	0.356522	0.321027	0.740009	0.170791	0.878018	0.22185	0.19952	NaN
NaN	3.8232	2.40079	3.26589	5.27779	1.97171	3.67197	3.98138	3.00267	3.34782	4.50187	2.83422	3.28551	4.28524	4.13013	3.43968	5.30455	2.25644	NaN	2.81949	3.2993	3.20978	3.84499	1.75031	4.89975	2.87227	NaN	2.34364	3.18816	1.92478	3.58457	3.88662	2.9312	3.26814	4.39472	3.20731	NaN	2.75238	3.22078	3.13339	3.75347	2.8039	2.56046	3.4831	2.10284	3.91618	3.20237	3.57048	3.50402	2.40651
NaN	0.243421	1.22362	0.441112	0.672546	0.434729	-0.5909	0.249214	0.36062	0.101644	-0.217509	-0.303643	0.0830188	0.199643	0.635275	0.413904	0.98381	-0.509637	0.0627716	0.442191	0.216537	-0.0329206	0.500303	0.104607	0.301365	0.398714	NaN	1.1945	0.430613	0.424381	-0.627963	0.243283	0.352037	0.0992251	-0.231152	0.0810428	0.0612775	0.431666	0.211383	-0.0349855	0.488395	0.389224	1.305	0.470449	0.463641	-0.602863	0.384604	0.108404	0.0885401	-0.519955
NaN	-0.303742	-0.744517	0.527328	-0.43305	-0.31322	-0.657211	-0.602352	-0.196665	0.265322	-0.280646	0.622138	-0.36399	-1.1375	-0.0371739	-1.15753	-0.799653	0.21415	NaN	-0.300971	0.184763	0.0171356	-1.19252	-0.570735	-0.487419	-1.12335	NaN	-0.791215	0.514777	-0.332866	-0.698434	-0.640133	-0.209001	0.259007	-0.298249	-0.38682	NaN	-0.319849	0.180366	0.0167278	-1.26732	-1.19381	-0.759589	0.562399	-0.319561	-0.670516	-0.200647	0.282967	-0.371358	0.228392
NaN	0.0151653	NaN	-0.183405	NaN	0.113747	NaN	-0.466079	0.365038	-0.113461	-0.0916475	-0.310356	NaN	0.240045	-0.517384	-0.0122608	NaN	NaN	NaN	0.114483	-0.281996	NaN	0.423476	0.536232	NaN	-0.0442042	NaN	NaN	-0.194908	0.11104	NaN	-0.495313	0.35635	-0.120578	-0.0973959	NaN	NaN	0.111758	-0.299684	NaN	0.413396	-0.0469768	NaN	-0.187117	0.121312	NaN	0.389316	-0.115758	NaN	NaN
-0.990043	0.237073	-0.643764	0.354244	0.318554	-0.314226	-0.134951	0.213176	0.192672	0.231177	-0.0774133	0.606268	0.486276	0.285616	0.15001	-0.698048	-0.158983	0.556393	-0.0862241	0.327227	0.259799	0.351442	0.254014	0.838425	0.165422	0.0799884	-1.05214	-0.684143	0.345812	-0.333935	-0.143415	0.208102	0.188086	0.225675	-0.082269	0.474702	-0.0916324	0.319439	0.253615	0.343078	0.247968	0.0780846	-0.656796	0.377803	-0.320587	-0.137683	0.205486	0.246552	0.518617	0.593397
NaN	0.507619	-0.132355	0.644291	-0.104337	-0.697053	-1.20303	0.70585	0.571908	0.178666	-0.56087	0.847838	0.237202	-0.604236	-0.401366	0.672588	0.825252	0.818531	-0.227194	-0.057697	0.657181	0.942268	0.463469	0.497609	0.442734	0.178728	NaN	-0.140656	0.628956	-0.740775	-1.27849	0.68905	0.558296	0.174414	-0.596049	0.231556	-0.241445	-0.061316	0.64154	0.919841	0.452438	0.174474	-0.135034	0.687141	-0.711164	-1.22739	0.609944	0.190549	0.252977	0.872969
NaN	-0.467096	0.622092	0.0108286	0.0817475	0.226438	NaN	-0.573531	0.730342	NaN	0.112323	-0.151856	-0.603128	-0.324846	0.0611034	NaN	NaN	-0.285896	1.60089	-0.573096	-0.324106	NaN	-0.0359245	-0.195825	-0.136269	0.464083	NaN	0.607286	0.0105709	0.221048	NaN	-0.609504	0.712959	NaN	0.10965	-0.640958	1.56279	-0.609042	-0.344435	NaN	-0.0381778	0.453037	0.663466	0.0115488	0.241497	NaN	0.778915	NaN	-0.615338	-0.291684
NaN	-0.969646	-1.8072	-2.898	-1.05664	NaN	NaN	-1.78811	-1.90178	-2.61975	0.00444275	-1.34868	-2.66629	-1.49333	-1.20586	-0.362654	NaN	-2.89273	NaN	-2.27257	-1.9749	NaN	-1.39747	-1.92347	-1.18933	-1.44645	NaN	-1.92055	-3.07978	NaN	NaN	-1.90026	-2.02106	-2.78407	0.004337	-2.83353	NaN	-2.41511	-2.09878	NaN	-1.48512	-1.53717	-1.84378	-2.95667	NaN	NaN	-1.94028	-2.67278	-2.72027	-2.95129
NaN	-1.12677	-2.65622	-0.516141	-1.63188	-0.846055	NaN	-0.106513	-1.53983	0.413459	-0.7839	0.164031	-0.675864	0.211913	-0.791805	NaN	-0.268687	0.210728	-1.02416	-0.0713528	-0.217615	0.133826	0.520888	0.603852	-1.05526	-0.706802	NaN	-2.82283	-0.548515	-0.899122	NaN	-0.113194	-1.63641	0.403618	-0.833069	-0.718256	-1.08839	-0.0758283	-0.231264	0.130641	0.50849	-0.751135	-2.70999	-0.52659	-0.863182	NaN	-1.571	0.440957	-0.689546	0.224743
-0.361767	-0.67987	-0.44474	-0.449835	-0.323133	-0.147362	-0.254294	-0.470607	-0.357486	-0.578371	-0.133738	-0.718204	-0.339574	-0.467917	-0.854089	-0.471798	-0.159651	-0.479508	-0.311541	-0.45937	-0.461945	-0.358703	-0.197017	-0.0298451	-0.329446	-0.236658	-0.384458	-0.472636	-0.47805	-0.156605	-0.270244	-0.500125	-0.379908	-0.614648	-0.142126	-0.360873	-0.331082	-0.488183	-0.49092	-0.381202	-0.209374	-0.251502	-0.453744	-0.458942	-0.150345	-0.259442	-0.364723	-0.59008	-0.346448	-0.489215
3.95493	2.28369	NaN	NaN	1.68374	NaN	0.422749	2.61252	0.516599	1.84051	2.90361	2.65012	2.45705	3.25392	2.60837	1.5438	-0.599831	2.62431	NaN	2.57336	1.79201	2.38283	0.435695	-0.0717492	3.21448	NaN	3.86079	NaN	NaN	NaN	0.412687	2.55034	0.504303	1.7967	2.8345	2.39856	NaN	2.51211	1.74936	2.32612	0.425325	NaN	NaN	NaN	NaN	0.450865	0.550956	1.96292	2.62046	2.79884
2.72872	2.62144	0.767803	0.158088	1.65636	-0.49757	1.01311	2.33891	1.28936	2.09986	2.71137	2.0491	2.67814	2.68544	2.38177	1.27333	0.792158	2.72034	-0.66819	2.16139	2.08554	1.84691	1.52815	0.825315	2.80596	1.8873	2.66377	0.749528	0.154325	-0.52878	0.988999	2.28324	1.25867	2.04988	2.64683	2.61439	-0.7101	2.10994	2.0359	1.80295	1.49178	1.84238	0.818867	0.168602	-0.507643	1.08049	1.37511	2.23951	2.85625	2.90126
NaN	-1.82842	-1.21307	-2.37734	-1.27494	-0.117387	NaN	NaN	-1.4443	-2.15412	-0.796005	-2.33358	-2.03611	-1.71813	-1.81819	-1.09439	NaN	-2.64744	NaN	-2.21708	-1.84524	-2.45339	-1.08649	-1.50363	-1.53193	-1.6463	NaN	-1.28915	-2.52645	-0.12475	NaN	NaN	-1.53489	-2.28923	-0.845933	-2.16382	NaN	-2.35614	-1.96097	-2.60727	-1.15464	-1.74956	-1.23762	-2.42546	-0.119763	NaN	-1.47354	-2.19773	-2.07733	-2.70103
NaN	0.685283	-0.798101	-0.835156	-0.226921	-0.697144	-2.1706	0.0734162	-0.886396	-0.72549	-0.184634	-1.04614	-0.120939	-0.540538	0.207137	-0.229087	-0.692329	0.106655	NaN	0.0957257	-0.299856	-0.495507	-1.34313	-0.996262	NaN	-0.151959	NaN	-0.848161	-0.887539	-0.740871	-2.30675	0.0716688	-0.941993	-0.770995	-0.196215	-0.128525	NaN	0.0934473	-0.318664	-0.526587	-1.42738	-0.16149	-0.814258	-0.852063	-0.711257	-2.21454	-0.90434	-0.740177	-0.123388	0.113748
NaN	-0.119628	-0.806143	-0.167137	-0.027319	-0.234307	NaN	0.17662	-0.273849	NaN	0.793692	-0.6149	-0.372776	0.308583	0.409764	0.090741	0.0472348	-0.702697	NaN	NaN	-0.209395	-0.421721	-0.892604	NaN	NaN	NaN	NaN	-0.856707	-0.177621	-0.249004	NaN	0.172416	-0.291025	NaN	0.774801	-0.396158	NaN	NaN	-0.222529	-0.448173	-0.948591	NaN	-0.822463	-0.170521	-0.239051	NaN	-0.279393	NaN	-0.380323	-0.716922
NaN	-0.401732	-1.79784	-1.2574	0.0202876	-2.07321	-1.00916	0.962781	-2.47781	0.798403	0.836596	0.593267	0.72454	-0.415824	-1.345	-3.05084	NaN	0.758394	NaN	1.01867	0.816052	0.507974	-1.54068	-2.2338	NaN	0.37732	NaN	-1.91061	-1.33627	-2.20324	-1.07245	0.939865	-2.63323	0.7794	0.816684	0.707295	NaN	0.994423	0.796629	0.495884	-1.63731	0.368339	-1.83424	-1.28285	-2.11518	-1.02959	-2.52797	0.851502	0.772727	0.808833
-0.25936	0.691225	0.0394693	0.965623	1.27669	-0.117632	1.12499	0.958334	1.49416	1.37689	1.14682	1.14889	1.63922	0.418383	-0.40327	-0.989278	NaN	1.01465	NaN	1.06877	1.06041	1.08254	0.913832	1.23478	NaN	1.77657	-0.275628	0.0385299	0.94264	-0.12501	1.09821	0.935524	1.4586	1.34412	1.11952	1.6002	NaN	1.04333	1.03518	1.05677	0.892082	1.73429	0.0420943	1.02984	-0.120014	1.19981	1.59353	1.46847	1.74824	1.08213
NaN	-1.61867	-0.725119	-0.0234916	NaN	-0.461718	-0.68803	NaN	-1.63147	0.0678409	-1.06959	0.351249	-0.524677	-0.80803	-1.50364	-1.87676	NaN	NaN	-0.640483	-0.218354	-0.344499	NaN	NaN	-0.631949	-0.286683	NaN	NaN	-0.770601	-0.024965	-0.490679	-0.731185	NaN	-1.7338	0.0662262	-1.13668	-0.557587	-0.680657	-0.23205	-0.366107	NaN	NaN	NaN	-0.739799	-0.0239671	-0.471065	-0.701958	-1.6645	0.0723528	-0.535299	NaN
0.700022	-0.450415	0.0822741	-0.377077	0.397051	1.28082	0.490739	-0.813596	0.0319132	-0.17475	0.264978	-0.678032	0.00381886	0.253515	0.156508	0.393707	0.0902703	-0.301266	0.921174	-0.393944	-0.434999	0.112296	0.228612	0.319095	0.0421388	0.385277	0.68336	0.0803159	-0.400728	1.25034	0.479059	-0.864628	0.0311536	-0.185711	0.258671	0.00372797	0.899249	-0.418653	-0.462283	0.109623	0.223171	0.376107	0.0877459	-0.38471	1.36601	0.523376	0.0340357	-0.178288	0.00407284	-0.307365
NaN	0.622609	0.873299	NaN	0.642386	1.30564	0.558993	0.0821256	0.807113	0.364538	1.07503	NaN	0.166532	NaN	0.663335	1.16368	0.829297	-0.151223	NaN	NaN	0.33008	0.0700148	0.948343	NaN	1.50608	0.571807	NaN	0.852513	NaN	1.27456	0.545688	0.0801709	0.787903	0.355861	1.04945	0.162568	NaN	NaN	0.322224	0.0683483	0.925771	0.558197	0.931379	NaN	1.39247	0.59617	0.860792	0.388782	0.177607	-0.154285
NaN	1.09701	0.470492	0.289343	0.102568	-1.14488	-0.249295	0.35719	0.227987	0.309935	0.0247451	0.594837	0.895311	0.241272	0.626668	0.960652	NaN	0.769504	NaN	-0.00357949	0.238634	0.344658	-0.390895	-0.564339	0.659012	0.41563	NaN	0.459293	0.282457	-1.21669	-0.264931	0.348688	0.222561	0.302558	0.0241562	0.874002	NaN	-0.003804	0.232954	0.336455	-0.415413	0.405737	0.501783	0.308587	-1.16805	-0.254341	0.24315	0.330547	0.954856	0.820681
NaN	-0.482522	NaN	-0.106026	-0.166458	-0.0816519	NaN	NaN	0.00804717	0.000208314	-0.0740402	-0.0508254	-0.28381	-0.0685556	-0.235062	-0.129143	NaN	-0.151637	NaN	0.13348	NaN	NaN	-0.028268	0.145464	NaN	0.0877279	NaN	NaN	-0.112676	-0.0867734	NaN	NaN	0.00785564	0.000203356	-0.0786842	-0.301612	NaN	0.130303	NaN	NaN	-0.0300411	0.0856398	NaN	-0.108173	-0.0833049	NaN	0.00858236	0.000222169	-0.289556	-0.154707
0.195563	0.232123	NaN	0.364783	0.0745213	-0.0556988	0.424516	0.159049	0.192147	0.200704	-0.121609	0.096922	0.128947	-0.0883872	0.463546	0.343095	0.572432	-0.268099	NaN	-0.0162239	0.248698	NaN	-0.0169709	0.0149177	NaN	NaN	0.190908	NaN	0.3561	-0.0591924	0.414412	0.155263	0.187574	0.195927	-0.129236	0.125878	NaN	-0.0172415	0.242779	NaN	-0.0180353	NaN	NaN	0.389043	-0.0568264	0.452749	0.204926	0.214052	0.137523	-0.273526
0.207866	-0.426767	0.280648	-0.261342	-0.262455	0.16074	NaN	NaN	0.18815	-0.398449	-0.0141542	-0.642063	-0.374555	-0.150388	-0.599456	0.271417	0.145564	-0.603356	NaN	-0.333486	-0.251397	NaN	0.0969409	0.256796	-0.735582	-0.0198076	0.202919	0.273969	-0.277734	0.156914	NaN	NaN	0.183672	-0.423441	-0.015042	-0.398049	NaN	-0.354404	-0.267165	NaN	0.0946336	-0.02105	0.299314	-0.266632	0.171431	NaN	0.200664	-0.406516	-0.382138	-0.615571
0.088725	0.340275	-0.421249	0.209561	NaN	-0.970048	0.00273638	0.609752	-0.391264	NaN	NaN	0.204886	0.107177	0.490471	NaN	-0.558676	0.0218491	0.364745	1.18009	0.351571	0.260847	NaN	-0.266194	-0.334235	NaN	NaN	0.0866133	-0.447671	0.204574	-1.03089	0.00267125	0.595239	-0.415805	NaN	NaN	0.104626	1.15201	0.343203	0.254639	NaN	-0.28289	NaN	-0.429777	0.223499	-0.989686	0.00291837	-0.399185	NaN	0.114305	0.389004
NaN	0.413642	0.197021	0.407543	0.683993	-0.311406	-0.297589	0.615996	0.500816	0.348962	-0.0207084	0.534895	0.835542	0.359394	-0.604128	-0.268845	0.39733	0.633785	-0.0605192	0.612815	0.386552	0.451282	0.293154	0.174097	0.0385965	0.464714	NaN	0.192332	0.397843	-0.330938	-0.316255	0.601334	0.488896	0.340657	-0.0220072	0.815655	-0.0643151	0.598229	0.377351	0.440541	0.286177	0.453653	0.210124	0.434648	-0.31771	-0.303614	0.534124	0.372171	0.891112	0.675937
-0.313989	-0.183353	-0.071667	-0.332906	-0.134565	-0.212552	0.018295	0.0512993	-0.26487	-0.121139	-0.559567	-0.759139	-0.568871	-0.351653	-0.60982	-0.0568992	-0.160721	-0.543815	0.532874	-0.477709	-0.20323	-0.162778	-0.146425	-0.494991	0.254954	-0.351818	-0.333683	-0.0761622	-0.353787	-0.225884	0.0178595	0.0500783	-0.281483	-0.128737	-0.594665	-0.604552	0.52019	-0.507672	-0.215977	-0.172988	-0.15561	-0.373885	-0.0731178	-0.339645	-0.216855	0.0195117	-0.270232	-0.123591	-0.580387	-0.554824
NaN	-0.08211	0.321718	-0.320275	0.275466	0.57072	NaN	0.0644479	-0.0254659	-0.179096	0.545771	-0.662416	-0.338175	-0.296233	0.0486401	0.187499	0.399555	NaN	-0.299794	-0.598098	0.0817197	NaN	0.0542328	0.127991	0.476687	-0.233886	NaN	0.314061	-0.340364	0.557136	NaN	0.062914	-0.0270632	-0.19033	0.532781	-0.359386	-0.318598	-0.635613	0.0797746	NaN	0.052942	-0.248556	0.343115	-0.326759	0.608677	NaN	-0.0259815	-0.182722	-0.345021	NaN
NaN	0.0474161	0.178969	-0.162944	0.271282	0.632958	-0.100302	-0.270451	-0.262616	-0.3428	0.673972	-0.405421	-0.0394297	-0.337357	-0.0775382	0.416602	NaN	-0.419592	-0.0564433	-0.312339	-0.0789139	-0.250221	-0.107692	0.282874	0.322674	0.00806116	NaN	0.17471	-0.173165	0.617893	-0.106593	-0.287415	-0.279088	-0.364302	0.657931	-0.0419029	-0.0599836	-0.33193	-0.0838636	-0.265916	-0.114447	0.0078693	0.190872	-0.166243	0.675055	-0.102332	-0.267932	-0.34974	-0.0402279	-0.428086
NaN	-0.807193	-0.820187	NaN	-0.964526	-0.846329	-2.58092	NaN	0.154696	-2.83221	NaN	0.395366	-1.02161	-1.26844	-0.68097	0.553925	-1.17782	-0.559389	NaN	-1.22438	-1.89294	NaN	-1.05093	NaN	-0.99272	-0.781975	NaN	-0.871631	NaN	-0.899413	-2.74281	NaN	0.151014	-3.00985	NaN	-1.08569	NaN	-1.30118	-2.01168	NaN	-1.11685	-0.831023	-0.836791	NaN	-0.863462	-2.63317	0.164985	-2.88954	-1.04229	-0.570714
NaN	-0.880794	-0.3687	0.600074	-0.771359	0.324465	0.469197	0.328086	0.44675	0.273332	-0.521174	0.29807	-0.0600676	0.438267	-0.335871	-0.291891	0.447469	NaN	1.5256	-0.0967766	-0.00407756	NaN	0.226604	0.470911	-0.79204	NaN	NaN	-0.391826	0.585791	0.316742	0.458029	0.320277	0.436117	0.266826	-0.553864	-0.0638353	1.48928	-0.102847	-0.00433332	NaN	0.221211	NaN	-0.376164	0.639983	0.346044	0.500402	0.476462	0.29151	-0.0612836	NaN
NaN	0.734584	0.478804	0.885451	0.0550014	0.866161	1.55327	NaN	1.33319	1.07992	0.48484	0.349104	1.09722	1.27341	0.677359	1.10294	1.65614	NaN	NaN	0.638478	NaN	1.14046	1.40256	0.951932	NaN	0.783444	NaN	0.467408	0.864376	0.845545	1.5163	NaN	1.30146	1.05422	0.4733	1.07111	NaN	0.623282	NaN	1.11332	1.36918	0.764797	0.510648	0.94434	0.923767	1.65657	1.42186	1.15174	1.17019	NaN
NaN	0.488778	NaN	-1.24102	NaN	-1.10829	NaN	-0.164978	-2.09739	-0.498707	-1.40618	0.102534	-0.441249	-0.428782	-1.35652	NaN	NaN	NaN	NaN	-0.102235	NaN	-0.159197	-0.83823	2.18702	NaN	NaN	NaN	NaN	-1.31886	-1.17781	NaN	-0.175326	-2.22895	-0.529988	-1.49438	-0.468926	NaN	-0.108648	NaN	-0.169182	-0.890807	NaN	NaN	-1.26615	-1.13073	NaN	-2.13985	-0.508803	-0.450182	NaN
NaN	-0.288098	-0.0466433	-0.538119	0.306631	-0.590305	-0.550485	-0.285945	-0.0952882	NaN	0.341491	0.177687	0.0496171	-0.272378	-0.0488755	-0.357152	-0.751694	-0.122438	0.191954	-0.29624	NaN	-0.302745	NaN	-0.382014	NaN	0.0161378	NaN	-0.0495689	-0.571872	-0.627331	-0.585013	-0.30388	-0.101265	NaN	0.333363	0.0484362	0.187385	-0.314821	NaN	-0.321735	NaN	0.0157537	-0.0475875	-0.549013	-0.602255	-0.561629	-0.0972172	NaN	0.052917	-0.124917
NaN	-0.262802	-0.244765	-0.538119	0.306631	-0.179611	-0.139158	-0.332005	-0.0952882	-0.171436	0.00067964	0.0865528	-0.158101	-0.210502	-0.0488755	-0.357152	-0.570505	-0.122438	0.191954	-0.223623	-0.613657	-0.434717	-0.617442	0.0709078	-0.121821	0.376805	NaN	-0.260118	-0.571872	-0.190877	-0.147886	-0.352829	-0.101265	-0.182189	0.000663463	-0.168018	0.187385	-0.237649	-0.652147	-0.461983	-0.65617	0.367837	-0.24972	-0.549013	-0.183247	-0.141975	-0.0972172	-0.174907	-0.161302	-0.124917
NaN	2.04932	NaN	1.1356	-1.11329	-2.26312	2.36148	NaN	-0.0851443	-0.289835	NaN	1.36413	-1.27315	2.04492	2.10358	-5.26862	-2.6929	1.36172	NaN	1.47209	1.45651	2.37958	-3.89137	-4.54926	NaN	1.76937	NaN	NaN	1.10857	-2.40507	2.30528	NaN	-0.0904848	-0.308015	NaN	-1.353	NaN	1.43706	1.42184	2.32294	-4.13545	1.72726	NaN	1.21112	-2.30894	2.51854	-0.086868	-0.295703	-1.29892	1.45229
2.53235	2.25786	1.50777	1.3376	0.790922	-0.354757	1.80178	2.26279	1.61455	2.05706	2.12616	2.30657	2.24259	2.72801	2.19098	1.18672	1.83867	1.71667	3.82911	2.02498	2.20723	1.9131	1.77233	1.83576	3.29055	1.91423	2.47208	1.47189	1.30577	-0.377008	1.75889	2.20893	1.57612	2.0081	2.07556	2.18922	3.73798	1.97679	2.15469	1.86757	1.73014	1.86867	1.60805	1.42657	-0.361938	1.92161	1.72193	2.19387	2.39174	1.83084
NaN	1.66527	0.651829	1.70692	0.458149	-0.665919	1.57318	1.56582	1.33275	1.80844	1.53373	1.89685	2.04697	1.66563	1.59276	0.546598	1.87735	2.01722	2.377	1.54553	1.89053	2.11803	1.64334	1.20414	2.06176	2.04295	NaN	0.636315	1.66629	-0.707688	1.53574	1.52855	1.30103	1.76539	1.49723	1.99824	2.32043	1.50874	1.84553	2.06762	1.60422	1.99432	0.695181	1.82044	-0.6794	1.67781	1.42139	1.92871	2.1831	2.15138
NaN	2.93873	1.91444	2.33823	1.11043	0.683302	3.62707	2.06284	2.59419	2.25467	2.65627	2.58155	NaN	2.56178	2.59867	2.0863	NaN	3.05002	NaN	2.77615	2.28302	NaN	2.00097	2.14277	NaN	3.28654	NaN	1.86887	2.28257	0.667039	3.54074	2.01374	2.53245	2.20101	2.59305	NaN	NaN	2.71007	2.22869	NaN	1.95335	3.20832	2.04176	2.49373	0.728747	3.8683	2.76673	2.40463	NaN	3.25287
NaN	1.49176	0.762925	2.78503	NaN	NaN	1.66878	1.1527	2.98104	1.98786	0.757969	-0.279615	0.813763	1.14374	0.393361	1.23756	2.95283	1.61526	NaN	2.24846	2.25337	2.42749	3.03106	2.17069	1.73168	0.941316	NaN	0.744766	2.71874	NaN	1.62906	1.12526	2.91009	1.94055	0.739928	0.794394	NaN	2.19495	2.19973	2.36972	2.95891	0.918912	0.813665	2.97026	NaN	1.77977	3.1793	2.12007	0.867884	1.72268
NaN	NaN	1.2229	2.45593	0.390627	NaN	2.75641	2.16209	3.25523	2.21852	NaN	2.99265	2.21433	3.90301	2.14469	0.348208	3.25903	2.36021	NaN	2.63246	2.40288	3.32286	3.15209	NaN	2.76956	2.90469	NaN	1.1938	2.39748	NaN	2.6908	2.11063	3.17775	2.16572	NaN	2.16162	NaN	2.56981	2.34569	3.24377	3.07707	2.83556	1.30424	2.61927	NaN	2.93973	3.47172	2.36607	2.3616	2.51718
NaN	0.811724	1.11105	1.87776	0.60419	1.17062	NaN	0.543096	1.4172	1.58669	-0.416526	-0.664499	0.483568	0.241615	1.32224	1.59009	1.6945	0.800636	1.1199	0.471633	0.963993	1.53445	2.15411	0.298493	1.20353	1.16444	NaN	1.08461	1.83306	1.14276	NaN	0.530169	1.38347	1.54893	-0.442652	0.472058	1.09325	0.460408	0.941049	1.49792	2.10284	1.13673	1.18494	2.00264	1.24848	NaN	1.51146	1.69222	0.515728	0.853883
NaN	0.152971	0.204439	NaN	0.394633	1.06787	0.350093	-2.47031	0.0499609	NaN	0.05005	-1.53447	0.140112	NaN	-0.35694	0.476598	NaN	-1.49896	-0.0271428	-1.55359	-0.205857	-1.24194	-0.0961767	-1.05552	NaN	-0.184713	NaN	0.199573	NaN	1.04246	0.34176	-2.62525	0.0487718	NaN	0.0488587	0.136777	-0.0288453	-1.65103	-0.218769	-1.31984	-0.102209	-0.196299	0.218035	NaN	1.13889	0.373376	0.0532837	NaN	0.14943	-1.5293
NaN	0.713303	-0.317751	0.207602	0.349189	-1.61921	-0.968251	0.709726	0.126517	0.43926	-0.337211	0.516322	0.605242	0.365559	0.763807	0.341093	-0.113992	0.415693	-0.750513	0.795754	0.597212	0.793124	0.0649629	-0.534871	0.0659295	-0.279913	NaN	-0.337681	0.202661	-1.72077	-1.02898	0.692833	0.123506	0.428805	-0.358362	0.590837	-0.797588	0.776814	0.582998	0.774246	0.0634167	-0.29747	-0.324183	0.221409	-1.65199	-0.987852	0.134932	0.468474	0.645495	0.44334
NaN	NaN	0.0811323	-0.120941	2.22037	-0.750592	-5.5911	NaN	0.723568	0.709548	0.458305	-6.46006	-6.25893	0.812003	0.97382	-0.317894	-4.39059	1.11656	-0.76201	1.39509	NaN	0.469778	1.69352	1.37688	NaN	0.074655	NaN	0.0792013	-0.128527	-0.797671	-5.94179	NaN	0.706346	0.69266	0.447396	-6.65151	-0.809806	1.36189	NaN	0.458597	1.65321	0.0728781	0.0865282	-0.123389	-0.765787	-5.70428	0.771691	0.756738	-6.38564	1.19082
-0.920262	-0.972815	1.35784	0.847273	-2.11132	-1.01276	-1.48549	1.09607	1.58068	0.455525	-1.56127	1.66873	0.114916	-1.8046	-1.81652	-0.786607	-1.5678	0.943804	-2.6204	-0.655277	-1.15018	-0.281804	0.879634	0.00660359	-3.46895	-1.18699	-0.977984	1.32552	0.827107	-1.07629	-1.57867	1.06998	1.54305	0.444683	-1.6592	0.112181	-2.78476	-0.696378	-1.22232	-0.29948	0.858697	-1.26144	1.44814	0.903623	-1.03327	-1.51556	1.6858	0.48582	0.122559	1.00657
0.259973	0.207988	-0.276607	0.236396	1.0514	-0.732611	-0.35003	1.05943	-0.634702	0.371756	-0.14153	0.500841	0.824056	0.475505	-0.267502	-0.724363	-0.477677	0.870862	NaN	0.882276	NaN	0.736035	-0.315275	NaN	0.253211	0.591577	0.253786	-0.293957	0.23077	-0.778563	-0.371985	1.03421	-0.674512	0.362907	-0.150407	0.804442	NaN	0.861277	NaN	0.718517	-0.335051	0.577497	-0.282207	0.252118	-0.747443	-0.357116	-0.647551	0.39648	0.878861	0.92878
NaN	-1.56047	-3.90579	-3.1096	NaN	-0.908375	NaN	-2.24024	NaN	NaN	-2.3258	-3.0474	-1.10775	-1.31159	-2.7635	NaN	NaN	-2.92803	NaN	-2.28204	NaN	NaN	NaN	-1.8584	NaN	-2.20799	NaN	-4.15077	-3.30465	-0.965351	NaN	-2.38076	NaN	NaN	-2.47168	-1.17723	NaN	-2.42517	NaN	NaN	NaN	-2.34649	-3.98486	-3.17255	-0.926764	NaN	NaN	NaN	-1.13017	-2.9873
NaN	0.396419	-0.98644	NaN	-1.00319	-1.83109	-1.19776	0.176583	-1.02242	-0.0634082	-0.492524	0.357008	0.122315	0.412736	-0.074376	-0.811751	-0.456412	0.44439	1.23397	0.206148	-0.108893	0.0478858	-1.4482	-0.572385	-0.334495	-0.479071	NaN	-1.04831	NaN	-1.94594	-1.27289	0.17238	-1.08655	-0.0673854	-0.523416	0.119404	1.2046	0.201242	-0.115723	0.046746	-1.53904	-0.50912	-1.00641	NaN	-1.86816	-1.22201	-1.04312	-0.0646919	0.13045	0.473945
NaN	1.09492	NaN	0.30625	1.37231	NaN	0.227917	1.26102	-0.50214	1.08259	0.998848	0.882511	1.27221	1.29253	0.861966	-0.355473	0.973423	NaN	NaN	1.17717	1.11527	NaN	0.304205	NaN	2.12259	0.758423	NaN	NaN	0.298961	NaN	0.222493	1.23101	-0.533635	1.05682	0.975074	1.24193	NaN	1.14915	1.08873	NaN	0.296965	0.740371	NaN	0.326618	NaN	0.243076	-0.512305	1.15459	1.35682	NaN
NaN	1.44918	-0.46162	3.16114	2.06101	1.9709	2.24058	0.95023	2.42387	1.20825	2.94547	3.05176	2.12668	2.88687	2.02218	0.362283	1.11276	2.03524	NaN	1.39787	2.06789	2.8448	1.88581	2.6392	2.38411	1.80487	NaN	-0.490574	3.0859	1.92399	2.18725	0.927614	2.36618	1.17949	2.87536	2.07606	NaN	1.3646	2.01868	2.77709	1.84092	1.76191	-0.470965	3.37137	2.10198	2.38959	2.58508	1.28861	2.26812	2.1706
-4.25679	-2.65646	-4.83116	-3.70114	-0.636308	-3.61946	-5.499	-3.32357	-3.61298	-3.97521	-5.72221	0.171808	-2.47888	-2.17194	-2.53517	-1.8498	-3.60144	-4.77433	-3.45342	-1.57261	-3.14119	-4.21114	-3.14723	-5.791	-3.51685	-4.10364	-4.52379	-5.13419	-3.93328	-3.84649	-5.84391	-3.53203	-3.83959	-4.22455	-6.08112	-2.63436	-3.67003	-1.67124	-3.33821	-4.47528	-3.34463	-4.36103	-4.92896	-3.77606	-3.69273	-5.61032	-3.68612	-4.05569	-2.52906	-4.87099
NaN	-2.83711	-5.21897	-4.2358	-1.60003	-4.32994	-5.19587	-3.48066	-4.26259	-4.54636	-6.13472	-0.719743	-2.79863	-2.8879	-2.33633	-2.39177	-4.026	-5.48203	-3.94564	-1.90826	-3.90291	-4.20821	-3.35507	-6.88314	-4.46944	-4.9303	NaN	-5.54632	-4.50148	-4.60153	-5.52177	-3.69897	-4.52996	-4.83152	-6.5195	-2.97416	-4.19313	-2.02795	-4.14772	-4.47216	-3.56551	-5.23954	-5.32462	-4.32155	-4.4176	-5.30106	-4.34889	-4.63839	-2.85528	-5.59301
1.1515	2.11667	3.496	-0.236742	2.26184	2.96993	3.03124	1.57036	2.88491	0.916712	2.85409	0.740426	2.37709	1.12964	1.34241	3.17496	2.95042	1.9149	3.65088	1.67279	2.57578	2.54925	3.50354	2.61895	4.01701	1.90357	1.12409	3.41279	-0.251591	2.89924	2.95909	1.53299	2.81625	0.894893	2.78616	2.32051	3.56398	1.63298	2.51447	2.48857	3.42015	1.85826	3.7285	-0.241535	3.16745	3.23283	3.07678	0.97768	2.53519	2.04225
NaN	-0.776077	0.30419	NaN	-0.0851323	0.461607	-0.172591	-1.05055	-0.645951	-0.913854	0.923683	0.157521	-0.771549	-1.45989	-0.541523	-0.305762	-1.1395	-1.10765	0.37815	-0.632584	-0.456403	NaN	-0.425273	-0.376753	0.38487	-0.342532	NaN	0.29695	NaN	0.450621	-0.183416	-1.11644	-0.686467	-0.971173	0.901698	-0.819943	0.36915	-0.672261	-0.48503	NaN	-0.451948	-0.364017	0.324421	NaN	0.492307	-0.176085	-0.659028	-0.932354	-0.787169	-1.13007
-0.718143	-0.315768	NaN	-0.574383	0.0960234	-0.222092	NaN	NaN	0.0665501	-1.55396	-0.709826	-1.05685	-1.23222	-0.707194	-0.589941	-0.276104	NaN	-1.48897	NaN	-0.330595	-1.7884	NaN	-0.113611	-0.131968	NaN	NaN	-0.763188	NaN	-0.61041	-0.236023	NaN	NaN	0.0649661	-1.65143	-0.754348	-1.30951	NaN	-0.35133	-1.90057	NaN	-0.120737	NaN	NaN	-0.586011	-0.226588	NaN	0.0709761	-1.58542	-1.25716	-1.51911
-0.844613	-0.852217	-0.628116	-1.23757	-0.531011	-0.280049	-1.00631	-0.85965	-0.882333	-0.879437	-0.913101	-0.831977	-0.722061	-0.6661	-0.840114	-1.03706	-1.23455	-1.17066	-1.49805	-0.856357	-0.853677	-1.15445	-1.00812	-0.835097	-1.27486	-0.790552	-0.89759	-0.667514	-1.3152	-0.297614	-1.06943	-0.91357	-0.937676	-0.934598	-0.970373	-0.767351	-1.59201	-0.91007	-0.907223	-1.22686	-1.07136	-0.840138	-0.640832	-1.26263	-0.285718	-1.02668	-0.900195	-0.897241	-0.736678	-1.19436
NaN	-2.35667	-2.34082	NaN	-3.51745	NaN	NaN	-2.89175	-1.15563	-2.5379	-3.16462	-1.21111	-3.42253	-1.99788	-2.15023	NaN	NaN	NaN	NaN	NaN	NaN	NaN	-1.72992	-2.30164	-2.43558	-2.71025	NaN	-2.48764	NaN	NaN	NaN	-3.07313	-1.22811	-2.69708	-3.36312	-3.63721	NaN	NaN	NaN	NaN	-1.83843	-2.88025	-2.38821	NaN	NaN	NaN	-1.17902	-2.58928	-3.49182	NaN
NaN	-2.16394	NaN	-2.40323	-2.36855	NaN	NaN	NaN	-0.880601	-2.39954	-1.69325	-1.43153	-2.41758	-2.15056	NaN	-1.03588	NaN	NaN	NaN	-2.971	-2.24096	NaN	-1.98968	-1.72301	-2.83394	NaN	NaN	NaN	-2.55397	NaN	NaN	NaN	-0.935835	-2.55005	-1.79945	-2.56922	NaN	-3.15735	-2.38152	NaN	-2.11448	NaN	NaN	-2.45188	NaN	NaN	-0.898428	-2.44812	-2.46652	NaN
NaN	-0.535574	-1.22873	-1.68878	0.0538162	-0.370148	-0.744163	-0.79029	-1.79197	NaN	0.207801	NaN	NaN	-0.720575	-0.300873	0.404452	NaN	-2.41052	NaN	-1.90474	-1.71474	-1.7604	-1.48282	NaN	-0.257378	NaN	NaN	-1.3058	-1.79471	-0.393365	-0.790839	-0.839859	-1.90437	NaN	0.202855	NaN	NaN	-2.02421	-1.82229	-1.87082	-1.57582	NaN	-1.25361	-1.72297	-0.377641	-0.759228	-1.82825	NaN	NaN	-2.45932
NaN	0.813665	-0.917885	NaN	-1.45041	NaN	NaN	0.514495	-3.49971	-1.1333	-0.638621	-1.16921	-0.0826114	-0.695185	0.763834	0.348293	NaN	0.228064	NaN	-0.69025	-0.459449	NaN	-2.92557	-2.94378	0.0576437	-1.21421	NaN	-0.975458	NaN	NaN	NaN	0.50225	-3.71922	-1.20439	-0.678677	-0.087793	NaN	-0.733545	-0.488267	NaN	-3.10907	-1.29036	-0.936467	NaN	NaN	NaN	-3.57055	-1.15625	-0.0842838	0.243231
-1.21051	0.543406	NaN	NaN	-1.83553	NaN	-3.02328	-0.0914634	NaN	-1.58208	-0.923889	-1.93267	0.498266	-1.5649	-0.252967	-1.00827	NaN	0.0517117	NaN	-0.486447	NaN	-1.2911	-2.41899	-2.56529	-1.503	-1.10802	-1.28644	NaN	NaN	NaN	-3.21291	-0.0972002	NaN	-1.68131	-0.981839	0.486407	NaN	-0.516959	NaN	-1.37208	-2.57071	-1.17752	NaN	NaN	NaN	-3.08449	NaN	-1.6141	0.531404	0.0551509
NaN	-0.00966104	NaN	0.962903	-1.25172	-0.0887513	1.75072	0.557212	1.011	1.95831	0.640571	1.90876	0.756854	1.6179	0.315486	1.48364	1.56108	0.497216	NaN	0.808536	1.01079	NaN	3.1576	1.48276	NaN	1.58128	NaN	NaN	0.939985	-0.094318	1.70905	0.54395	0.986933	1.9117	0.625325	0.73884	NaN	0.789292	0.986736	NaN	3.08245	1.54365	NaN	1.02694	-0.090548	1.86716	1.07823	2.08855	0.80719	0.530285
1.60158	-0.362276	-0.342676	NaN	-0.195572	-0.630029	1.10291	-0.515894	-0.594627	0.154723	-0.77852	1.37886	0.176356	0.102053	-0.621916	-1.15028	-0.04412	0.025976	-0.0282365	0.10873	0.495002	0.860236	-0.291818	-0.612396	2.42994	0.35839	1.56346	-0.36417	NaN	-0.669546	1.07666	-0.548252	-0.631924	0.15104	-0.827351	0.172159	-0.0300075	0.106142	0.48322	0.839762	-0.310122	0.34986	-0.349613	NaN	-0.642783	1.17626	-0.606665	0.165013	0.188085	0.0277036
NaN	-0.402486	-0.906129	-0.266303	-0.483673	-1.04791	NaN	-0.478737	-0.523245	-0.327421	-0.769064	0.231115	0.12648	0.00354417	-0.265911	-0.490657	NaN	-0.12336	-1.27942	-0.150861	-0.346982	-0.118658	-0.560078	-0.543303	-0.876933	-0.478402	NaN	-0.962964	-0.283006	-1.11364	NaN	-0.508765	-0.556064	-0.347958	-0.817303	0.12347	-1.35967	-0.160324	-0.368746	-0.126101	-0.595208	-0.508409	-0.924473	-0.271694	-1.06913	NaN	-0.533837	-0.334049	0.134892	-0.125858
-0.439113	0.459711	0.108705	0.612301	-2.0899	-1.04967	-3.32897	0.24259	-0.105879	-0.209392	-2.58379	-1.1407	-1.48301	-1.14383	0.885613	0.347277	0.61504	-0.0658006	-2.35945	-1.47096	-0.128092	0.390597	-0.0188695	-1.44352	0.422504	-0.232565	-0.466655	0.106118	0.597727	-1.11551	-3.53777	0.236816	-0.11252	-0.222526	-2.74585	-1.57603	-2.50745	-1.56322	-0.136126	0.3813	-0.020053	-0.247152	0.115935	0.653023	-1.07092	-3.39636	-0.108023	-0.213631	-1.51303	-0.0671327
0.871867	0.105778	-0.184085	NaN	-0.289049	1.15789	0.58722	-0.0869976	0.192633	-0.215536	0.456391	NaN	0.0414696	0.0652935	NaN	0.573367	0.5078	NaN	0.972149	NaN	-0.0276423	0.0535734	0.416968	0.392792	0.150049	0.300294	0.851115	-0.195632	NaN	1.13033	0.573244	-0.0924544	0.188048	-0.229056	0.445529	0.0404826	0.94901	NaN	-0.0293762	0.0522983	0.407043	0.293146	-0.187812	NaN	1.2349	0.626275	0.205444	-0.2199	0.0442276	NaN
NaN	-0.145548	-2.08931	0.236615	-0.204546	-0.70612	0.0765503	-0.513614	NaN	0.793867	-0.447595	-1.08752	0.135904	0.711956	-0.546497	-0.57794	-0.207141	0.175448	NaN	0.55622	NaN	NaN	0.822682	-0.0641548	0.580833	0.0152637	NaN	-2.22036	0.230983	-0.75041	0.0747283	-0.54583	NaN	0.774972	-0.475669	0.132669	NaN	0.542981	NaN	NaN	0.803101	0.0149004	-2.1316	0.252351	-0.720414	0.0816414	NaN	0.846665	0.144943	0.187117
-1.89444	-0.179857	-1.68164	0.180975	-0.259772	-0.56362	0.0634638	0.00679817	-0.780323	0.397957	-0.705199	-0.743005	-0.163262	-0.527416	-0.640401	-0.781045	0.269902	-0.0129693	-0.135671	-0.285279	0.0364896	-0.179419	0.319506	-0.236948	-0.00722184	-0.489964	-2.01326	-1.78712	0.176668	-0.598972	0.0619533	0.00663637	-0.829267	0.388485	-0.749431	-0.173502	-0.14418	-0.303173	0.0356211	-0.190673	0.311901	-0.520696	-1.71569	0.193012	-0.57503	0.0676846	-0.79612	0.424423	-0.166567	-0.0132319
NaN	-1.48645	-0.349005	NaN	-1.42904	-0.562838	NaN	-1.09933	-1.28329	-0.183019	-1.20259	1.07875	-0.897488	-1.3845	NaN	-1.86184	NaN	-0.988553	0.503007	-0.617081	0.222978	NaN	-0.710398	-1.29284	2.05666	0.48594	NaN	-0.370896	NaN	-0.598141	NaN	-1.16828	-1.36378	-0.194499	-1.27802	-0.953782	0.491035	-0.655786	0.217671	NaN	-0.754956	0.474374	-0.356071	NaN	-0.574232	NaN	-1.30927	-0.186724	-0.915657	-1.00857
-2.04926	-0.927825	-2.08093	-1.59128	-1.51149	-1.77582	-2.23944	-0.869232	-1.66724	-1.22315	-1.36689	-0.665478	-1.15036	-0.984684	-1.56142	-1.83973	-1.36185	-1.22109	2.73932	-0.73688	-1.0857	-1.31348	-1.41737	-1.79672	-1.74121	-1.19818	-2.17779	-2.21146	-1.69109	-1.88721	-2.3799	-0.923753	-1.77182	-1.29987	-1.45263	-1.22251	2.67412	-0.783099	-1.1538	-1.39586	-1.50627	-1.27334	-2.12306	-1.62349	-1.81177	-2.28477	-1.70099	-1.24791	-1.17364	-1.24581
NaN	-0.166823	-0.00472849	1.47588	2.75395	3.97997	3.06527	0.355119	1.38854	NaN	2.73261	1.04314	1.04754	2.09029	2.56046	3.08034	1.86383	0.752881	1.55022	0.966982	NaN	-0.517651	1.12279	2.70138	1.96955	2.02677	NaN	-0.00502508	1.44076	3.88524	2.99232	0.346667	1.35549	NaN	2.66757	1.0226	1.51333	0.943967	NaN	-0.55012	1.09606	1.97853	-0.00482422	1.57404	4.24467	3.26914	1.48089	NaN	1.1172	0.802953
-0.372782	-0.294591	-0.420302	0.0349306	0.896082	1.16975	0.370598	-0.594335	-0.169196	-0.337328	0.602885	-0.27977	-0.152609	0.170176	0.490359	0.794557	0.030414	-0.418433	0.450224	-0.10717	-0.0711031	-0.496872	-0.0312103	1.08312	0.854567	0.208894	-0.396164	-0.446664	0.0340992	1.1419	0.361777	-0.631614	-0.179808	-0.358486	0.588535	-0.162182	0.439508	-0.113892	-0.0755629	-0.528038	-0.0331679	0.203922	-0.42881	0.0372537	1.24754	0.395245	-0.172621	-0.344157	-0.155699	-0.426904
NaN	1.52038	1.38767	1.94326	0.493167	0.745767	2.97477	2.2161	0.623244	2.05173	1.08798	1.26144	1.61664	2.47262	1.04437	0.297881	2.91099	1.6549	3.29	1.64677	1.91326	2.29705	2.48894	1.5245	2.71217	1.49503	NaN	1.35464	1.897	0.728017	2.90396	2.16336	0.60841	2.0029	1.06209	1.57816	3.21169	1.60757	1.86772	2.24238	2.4297	1.45944	1.47996	2.0725	0.795366	3.17261	0.664694	2.18819	1.72416	1.76496
0.504322	0.00126219	0.103138	0.0862376	0.0298988	0.777615	0.0173084	-0.12638	0.367122	-0.259982	0.170629	0.135768	-0.173224	-0.041208	0.162032	0.605975	0.21417	-0.104087	0.459692	0.0563811	-0.122965	0.221709	0.416735	0.319425	-0.209899	0.244826	0.492319	0.100683	0.084185	0.759107	0.0168965	-0.134307	0.358384	-0.276288	0.166568	-0.184089	0.448751	0.0550392	-0.130678	0.216432	0.406816	0.238999	0.109997	0.091973	0.829332	0.0184596	0.391538	-0.265245	-0.17673	-0.106194
NaN	-0.372303	-0.327684	NaN	-0.506422	-0.471033	-0.811897	-0.618852	-0.378092	NaN	-0.65886	-0.660453	NaN	-0.968142	0.492148	0.136773	NaN	NaN	NaN	-1.19651	NaN	-0.663185	-0.788504	-0.999887	NaN	NaN	NaN	-0.348237	NaN	-0.500577	-0.862822	-0.657668	-0.401807	NaN	-0.700186	NaN	NaN	-1.27156	NaN	-0.704782	-0.837962	NaN	-0.334317	NaN	-0.480568	-0.828333	-0.385746	NaN	NaN	NaN
NaN	2.8235	4.85052	NaN	2.41594	NaN	1.72677	2.87391	6.18353	2.85348	0.231762	3.02835	2.71376	1.97004	3.14408	3.30744	4.38002	3.1161	4.76095	2.30847	3.0716	3.70167	5.00748	NaN	NaN	4.23249	NaN	4.73507	NaN	NaN	1.68567	2.8055	6.03636	2.78557	0.226246	2.64917	4.64763	2.25353	2.9985	3.61356	4.8883	4.13175	5.17311	NaN	NaN	1.84161	6.59478	3.04326	2.89425	3.32334
5.18234	3.31966	5.99604	2.9917	NaN	6.22718	5.18057	3.72588	4.48386	3.44439	3.91627	3.30072	NaN	3.66722	3.97011	NaN	5.00035	NaN	NaN	2.80847	3.42187	3.63523	4.9131	5.057	3.06308	3.3972	5.05899	5.85332	2.9205	6.07897	5.05727	3.6372	4.37714	3.36241	3.82306	NaN	NaN	2.74163	3.34042	3.54871	4.79616	3.31634	6.39481	3.19067	6.64133	5.52512	4.78207	3.67347	NaN	NaN
NaN	2.74241	5.01532	3.4692	0.886665	1.16596	2.97066	3.17649	5.18801	2.78278	0.0687906	3.62953	3.30308	3.06098	2.69548	2.25289	3.77773	3.03397	4.01824	2.55637	3.25718	3.28215	4.38001	4.07876	NaN	3.95413	NaN	4.89595	3.38662	1.13821	2.89995	3.10089	5.06453	2.71655	0.0671533	3.22446	3.9226	2.49552	3.17966	3.20403	4.27576	3.86002	5.34887	3.69992	1.24351	3.16823	5.53305	2.96786	3.52276	3.23576
NaN	0.758828	0.311083	-1.14991	-1.73641	-2.4484	NaN	NaN	-2.4925	-0.597629	0.162633	-0.0294445	1.33843	-0.798494	0.679999	-0.23263	NaN	0.819461	-1.49246	0.174432	0.444405	0.455757	-2.40679	-2.54324	2.10209	-0.928534	NaN	0.303678	-1.22203	-2.60197	NaN	NaN	-2.64884	-0.635115	0.158762	1.30657	-1.58608	0.17028	0.433827	0.44491	-2.55775	-0.986775	0.331772	-1.17318	-2.49796	NaN	-2.54296	-0.609728	1.42744	0.87396
0.599055	-0.223395	0.598517	0.147369	-0.102975	1.01836	0.374336	-0.32488	0.0631108	0.0126571	0.0698273	-0.385773	-0.238437	-0.120739	-0.185555	-0.0537598	0.460493	-0.0639176	1.00391	-0.0222513	-0.146979	0.200316	0.190874	0.536303	0.248719	0.353497	0.584797	0.584272	0.143862	0.994123	0.365426	-0.345258	0.0616087	0.0123558	0.0681653	-0.253393	0.980014	-0.023647	-0.156198	0.195548	0.186331	0.345083	0.638323	0.15717	1.08609	0.399232	0.0673081	0.0134989	-0.243264	-0.0652116
NaN	0.362183	0.642768	NaN	0.0157268	NaN	NaN	-0.0383555	0.4126	0.270014	0.807142	0.194047	0.108893	0.320574	0.454361	0.653211	1.14391	0.146328	NaN	0.213739	NaN	0.391247	0.361836	0.62121	0.958654	0.667525	NaN	0.627469	NaN	NaN	NaN	-0.0407613	0.40278	0.263588	0.787931	0.106301	NaN	0.208652	NaN	0.381935	0.353224	0.651637	0.685517	NaN	NaN	NaN	0.440041	0.287972	0.116135	0.15606
NaN	-0.734085	0.491665	-0.95574	0.27864	0.904925	-0.249864	NaN	-0.328238	-0.815617	NaN	-0.43375	-0.457171	-0.856949	-0.785085	-0.157389	-0.808613	-0.930857	NaN	-0.891674	-0.675466	NaN	0.0569085	0.436179	NaN	-0.595855	NaN	0.479963	-1.01569	0.883387	-0.265536	NaN	-0.348826	-0.866775	NaN	-0.485846	NaN	-0.947602	-0.717834	NaN	0.055554	-0.633229	0.524364	-0.975088	0.965109	-0.254922	-0.334883	-0.832128	-0.466426	-0.949701
NaN	-1.58136	-1.78104	-1.97939	NaN	NaN	-2.65151	-0.743421	-1.82915	NaN	-1.03057	-1.88948	NaN	-1.90765	-2.19976	-0.888183	NaN	NaN	NaN	-1.73458	-0.972022	NaN	NaN	-0.976583	NaN	NaN	NaN	-1.89275	-2.10355	NaN	-2.81782	-0.79005	-1.94387	NaN	-1.09522	NaN	NaN	-1.84338	-1.03299	NaN	NaN	NaN	-1.81709	-2.01946	NaN	-2.70519	-1.86617	NaN	NaN	NaN
4.0924	3.70605	4.9997	3.14388	1.97762	3.11315	4.92369	2.64749	2.86676	2.5241	3.9583	2.02829	2.35843	2.74854	2.67988	2.80602	4.83223	2.48517	4.94821	2.52421	2.77239	3.35543	4.25826	2.60054	5.47076	2.50066	3.995	4.8807	3.06905	3.03906	4.8065	2.58448	2.79852	2.46403	3.86409	2.3023	4.83043	2.46413	2.7064	3.27557	4.1569	2.44114	5.33221	3.35297	3.3202	5.25115	3.05742	2.69197	2.51528	2.65045
NaN	0.848873	1.14658	NaN	0.904894	0.399669	NaN	1.41526	0.327915	1.12201	0.350933	NaN	1.0668	1.28541	0.139659	-0.0815736	NaN	NaN	NaN	0.541482	1.20845	1.42407	1.20518	NaN	NaN	NaN	NaN	1.11929	NaN	0.390157	NaN	1.38158	0.32011	1.0953	0.34258	1.04141	NaN	0.528594	1.17969	1.39018	1.1765	NaN	1.22284	NaN	0.42625	NaN	0.349724	1.19663	1.13775	NaN
NaN	-2.29751	-2.1592	-2.29469	-1.22129	-0.391772	-1.47122	-1.72534	-1.56546	-2.26962	-1.89573	-1.78748	-1.99555	-1.01409	-2.11502	-1.23573	-1.38269	-2.45325	-2.20811	-0.861624	-2.16497	-1.93322	-1.38243	-0.94524	-1.93657	-1.98129	NaN	-2.29463	-2.43862	-0.416345	-1.56349	-1.83356	-1.66366	-2.41197	-2.01464	-2.12072	-2.34661	-0.915668	-2.30077	-2.05447	-1.46914	-2.10557	-2.20291	-2.34115	-0.399703	-1.501	-1.59716	-2.31556	-2.03595	-2.50291
3.77344	-0.223679	-0.609256	-0.239511	-1.32245	NaN	1.82011	NaN	-0.382618	0.118031	0.00660869	NaN	0.655312	0.0081207	NaN	-0.288118	NaN	0.212963	3.52162	-0.515079	1.06895	NaN	NaN	NaN	2.49595	-1.49838	3.68362	-0.64747	-0.254534	NaN	1.77679	NaN	-0.406617	0.115222	0.00645139	0.639715	3.4378	-0.547386	1.04351	NaN	NaN	-1.59237	-0.62159	-0.244359	NaN	1.94116	-0.390364	0.125881	0.698895	0.227126
1.02238	0.852499	-1.63119	-0.77553	1.56453	-1.689	-0.795319	1.26909	-0.508873	0.675948	0.168167	0.335495	0.662212	0.689519	0.454361	-1.02322	-1.35006	1.11511	-0.43955	0.765428	1.07369	0.562999	-0.56927	-0.687273	-0.261764	0.163397	0.998047	-1.7335	-0.824173	-1.79493	-0.845204	1.23888	-0.540791	0.65986	0.164165	0.64645	-0.46712	0.74721	1.04813	0.549599	-0.604977	0.159508	-1.66421	-0.791229	-1.72319	-0.811419	-0.519174	0.720903	0.706253	1.18928
-1.89075	-2.1363	-1.92181	NaN	-2.89538	NaN	-2.42374	-2.5345	-1.67383	-1.9234	-1.85792	-1.48182	-2.54802	-0.843588	-2.40466	-1.0568	-2.16099	NaN	-2.14998	-2.98397	0.937423	NaN	-0.343355	-2.01123	NaN	-2.37654	-2.00934	-2.04235	NaN	NaN	-2.57577	-2.69347	-1.77882	-2.04404	-1.97446	-2.70784	-2.28483	-3.17113	0.915111	NaN	-0.364891	-2.52561	-1.96072	NaN	NaN	-2.47281	-1.70772	-1.96234	-2.59961	NaN
NaN	NaN	-2.10722	NaN	-2.88261	-1.83774	-2.72856	NaN	-1.49359	-3.62259	-2.70179	-0.791613	NaN	-2.26926	-3.43246	-1.64929	NaN	-3.35306	-1.87303	-3.25612	-3.28047	NaN	-1.38001	-2.04015	-1.91332	-2.82095	NaN	-2.23939	NaN	-1.95301	-2.8997	NaN	-1.58727	-3.84981	-2.87125	NaN	-1.99051	-3.46035	-3.48623	NaN	-1.46657	-2.99789	-2.14988	NaN	-1.87494	-2.7838	-1.52383	-3.69592	NaN	-3.42094
NaN	1.33125	NaN	-1.54534	-0.537447	NaN	NaN	1.15908	-1.28651	-0.0168061	NaN	3.00102	0.473725	-0.12352	1.79658	1.09489	NaN	1.10587	NaN	-0.715714	-0.655803	NaN	-1.96083	0.27309	NaN	0.825673	NaN	NaN	-1.64227	NaN	NaN	1.13149	-1.3672	-0.0178602	NaN	0.46245	NaN	-0.760606	-0.696937	NaN	-2.08382	0.806021	NaN	-1.57663	NaN	NaN	-1.31255	-0.0171463	0.505231	1.17941
NaN	-0.316965	0.311878	NaN	0.924526	0.801272	-0.154757	NaN	-0.618493	-0.339519	1.00665	-1.43922	-0.102247	-0.714293	0.628989	0.475286	-0.497152	-1.03901	0.692933	-0.304808	-0.308393	-0.764496	-0.119243	-0.788461	1.05919	-0.0972682	NaN	0.304455	NaN	0.7822	-0.164464	NaN	-0.657287	-0.360815	0.982693	-0.108661	0.676441	-0.323927	-0.327737	-0.812448	-0.126722	-0.103369	0.33262	NaN	0.854562	-0.15789	-0.631014	-0.346393	-0.104317	-1.06005
NaN	-0.0769936	0.794447	-0.16218	0.613188	1.72757	NaN	-0.265514	-0.170469	-0.0720842	0.862454	-0.917269	-0.555008	0.152187	0.589063	1.52474	0.494411	-0.982871	1.39299	-0.451316	0.0406922	NaN	0.295601	0.420682	1.3811	0.8957	NaN	0.775538	-0.172353	1.68645	NaN	-0.282168	-0.181161	-0.0766055	0.841926	-0.58982	1.35984	-0.479624	0.0397237	NaN	0.288566	0.874381	0.847283	-0.165464	1.84246	NaN	-0.17392	-0.0735434	-0.566244	-1.00277
NaN	1.82868	-1.05176	1.31668	4.85116	NaN	2.91969	2.01228	NaN	1.6418	NaN	0.65719	2.03074	0.89147	NaN	-0.100226	NaN	NaN	NaN	2.2367	2.33506	NaN	NaN	-0.082203	NaN	NaN	NaN	-1.11773	1.28535	NaN	2.8502	1.96439	NaN	1.60272	NaN	1.98241	NaN	2.18347	2.27948	NaN	NaN	NaN	-1.07305	1.40425	NaN	3.11387	NaN	1.75099	2.1658	NaN
NaN	NaN	2.67359	0.163718	2.95279	3.73853	3.33322	NaN	1.1532	0.563583	3.04168	NaN	NaN	1.37259	1.95491	3.51801	NaN	1.37659	NaN	1.03493	NaN	-0.355072	2.67873	2.69589	2.88351	2.6079	NaN	2.60996	0.159821	3.64955	3.25388	NaN	1.12575	0.550169	2.96928	NaN	NaN	1.0103	NaN	-0.377344	2.61497	2.54583	2.85141	0.174606	3.98717	3.5549	1.22989	0.601066	NaN	1.46814
NaN	0.945646	NaN	3.45604	7.62053	4.45203	9.23247	5.18465	NaN	1.36098	2.63384	2.37437	2.25318	4.0279	2.70433	2.29556	2.66507	4.07929	5.94594	2.87516	5.74027	NaN	4.77667	3.78784	NaN	6.18002	NaN	NaN	3.37378	4.34607	9.01272	5.06124	NaN	1.32858	2.57115	2.19955	5.80442	2.80673	5.60364	NaN	4.66298	6.03293	NaN	3.68589	4.74812	9.84649	NaN	1.45149	2.40303	4.35059
NaN	-0.683512	NaN	-1.94907	-2.85246	-1.92963	-2.10046	0.081736	-2.76681	-0.150671	-2.19366	-0.593555	-0.782283	-1.18224	-1.59901	NaN	NaN	-1.5327	NaN	-0.216593	-0.463571	-1.45117	-3.4754	-1.6084	-1.45841	NaN	NaN	NaN	-2.07132	-2.05066	-2.2322	0.0797906	-2.94035	-0.160121	-2.33125	-0.83135	NaN	-0.230179	-0.492648	-1.5422	-3.69339	NaN	NaN	-1.98853	-1.96869	-2.14298	-2.82282	-0.153721	-0.798119	-1.56372
NaN	-0.523703	-0.29951	-0.190032	-0.543482	-0.484334	0.0260996	0.0608823	-0.565418	0.352912	0.100505	-0.827553	-0.188972	-0.428424	-0.561461	-0.473011	-0.422297	-0.265966	-0.519154	0.0375605	-0.10679	-0.256673	-0.281625	0.0500183	-0.639653	-0.631145	NaN	-0.318297	-0.201951	-0.514713	0.0254784	0.0594332	-0.600882	0.344512	0.0981132	-0.200825	-0.551717	0.0366665	-0.113488	-0.272773	-0.29929	-0.670732	-0.305574	-0.193879	-0.494139	0.0278354	-0.576864	0.376383	-0.192798	-0.27135
-0.510296	1.07754	-0.925423	1.04511	-0.685259	-2.02124	-0.509849	0.613113	-1.53205	2.01004	0.00429845	2.49172	0.186809	0.0187196	1.327	-1.25318	-0.0556136	1.80801	-1.32122	1.1399	2.03742	1.26188	-1.60831	-0.869829	0.681129	-0.982368	-0.542304	-0.983468	1.02024	-2.14802	-0.541828	0.598521	-1.62814	1.9622	0.00419614	0.182362	-1.40409	1.11277	1.98892	1.23185	-1.70919	-1.04399	-0.944157	1.11462	-2.06216	-0.52017	-1.56306	2.14372	0.199233	1.92826
NaN	-0.237068	-0.968967	-1.53674	-1.61903	-2.3209	-1.07102	0.25834	-2.10599	0.174558	-1.06272	0.116815	-0.414799	0.74664	-0.16715	-1.07933	-0.904762	-0.00895029	NaN	-0.13764	-0.298264	NaN	-1.0263	-2.32618	-0.426857	-0.877807	NaN	-1.02974	-1.63313	-2.46647	-1.1382	0.252191	-2.23808	0.170403	-1.12938	-0.440816	NaN	-0.146273	-0.316972	NaN	-1.09068	-0.932866	-0.988583	-1.56785	-2.36789	-1.0927	-2.14862	0.186167	-0.423196	-0.00913148
NaN	0.856164	-0.30809	0.816485	0.160235	-0.33873	0.572063	1.08384	0.0606971	0.916425	-0.0787359	0.56705	0.750579	0.728345	-0.299938	-0.0230831	0.505693	1.05164	0.995766	0.482985	0.906043	0.900497	0.538725	-0.426841	1.06867	0.795032	NaN	-0.327414	0.797051	-0.359976	0.558447	1.05805	0.0592524	0.894613	-0.0836745	0.732715	0.972066	0.47149	0.884478	0.879064	0.525903	0.77611	-0.314327	0.870787	-0.345587	0.610109	0.0647339	0.977373	0.800498	1.12158
NaN	0.995108	NaN	NaN	NaN	NaN	-0.479408	0.0838973	-0.531976	-0.614036	0.239061	0.980441	0.946662	NaN	0.644263	0.527137	-0.362603	-0.226476	NaN	NaN	0.609683	NaN	0.72636	-0.51923	NaN	-0.851115	NaN	NaN	NaN	NaN	-0.509478	0.0819004	-0.565343	-0.65255	0.233371	0.924131	NaN	NaN	0.595172	NaN	0.709072	-0.9045	NaN	NaN	NaN	-0.489113	-0.542745	-0.626467	1.00962	-0.23106
NaN	-1.33403	-2.58022	-1.26898	-1.34686	-1.8949	-1.54439	-0.465388	-1.53663	-1.07121	-1.06446	-0.39288	-0.838576	-1.24608	-2.19124	-1.98009	-1.80702	-0.886036	-1.46625	-0.611613	-0.965403	-0.666833	-1.27459	-2.15164	-1.83556	-1.8275	NaN	-2.74206	-1.34857	-2.01375	-1.64126	-0.494579	-1.63302	-1.1384	-1.13122	-0.891174	-1.55822	-0.649975	-1.02596	-0.708659	-1.35454	-1.94213	-2.63246	-1.29466	-1.93326	-1.57565	-1.56774	-1.09289	-0.855552	-0.903973
NaN	-0.849988	-0.0743604	-0.633193	-2.14555	-1.71388	-1.48117	-0.859722	-0.417374	-0.929401	-2.03049	0.0554671	-1.12877	-0.722044	-1.38716	-1.32345	-0.834745	-0.0733253	-2.20375	-1.28019	-1.33955	-1.05627	0.0200035	-1.06177	-2.20312	-1.40106	NaN	-0.0790245	-0.672909	-1.82138	-1.57408	-0.913647	-0.443553	-0.987696	-2.15785	-1.19957	-2.34197	-1.36048	-1.42357	-1.12252	0.0195273	-1.48893	-0.0758658	-0.646012	-1.74858	-1.51116	-0.425824	-0.948216	-1.15162	-0.0748097
NaN	1.75793	0.521072	1.86046	1.60002	1.09175	2.04057	1.1502	2.99373	1.30707	1.56672	0.66552	2.38982	1.72771	1.3611	1.51178	2.42596	1.92457	2.35694	1.26921	2.13913	1.7047	2.46942	2.67489	1.561	1.41652	NaN	0.50867	1.81618	1.06577	1.992	1.12282	2.92247	1.27596	1.52943	2.33294	2.30084	1.239	2.08821	1.66413	2.41064	1.3828	0.555727	1.98419	1.16436	2.17629	3.19283	1.394	2.54876	2.05257
NaN	-0.959667	-0.902763	0.235102	0.280002	0.883451	0.793021	-1.81771	0.479675	0.108193	0.570254	0.0509704	-1.25821	-0.0108674	-0.12146	-0.0340939	0.109515	-0.850564	0.074458	-0.256369	-0.688631	NaN	-0.338454	0.984389	-0.765792	1.29471	NaN	-0.959387	0.229506	0.862424	0.774146	-1.93172	0.468258	0.105618	0.556682	-1.33713	0.0726858	-0.272449	-0.731824	NaN	-0.359683	1.2639	-0.921038	0.250738	0.942207	0.845762	0.511577	0.115388	-1.28368	-0.867783
0.613039	0.0889815	-0.343788	-0.401091	-0.299131	-0.567832	0.00772292	0.118718	-0.416659	-0.00428714	0.12373	0.331022	-0.0857124	-0.32792	0.0132368	-0.0180951	-0.933664	0.0416707	-0.100576	0.284526	0.078182	0.0457716	-0.383786	-0.162255	-0.13599	0.0751986	0.598448	-0.365352	-0.426248	-0.603449	0.0075391	0.115893	-0.442793	-0.00455604	0.120785	-0.0910885	-0.106884	0.277754	0.0763212	0.0446821	-0.407859	0.0734087	-0.350748	-0.40921	-0.579328	0.00823655	-0.425093	-0.00437393	-0.0874475	0.0444421
-1.03721	-2.54998	-0.893521	-0.882652	-1.00025	-0.713761	-0.999616	-2.27249	-0.374535	-0.171078	-0.986601	-0.105368	-1.47617	-0.740325	-0.781598	-0.0573449	-0.651721	-0.824149	-1.08307	-1.06917	-0.816799	-0.323262	0.279657	-0.250269	-1.23455	-0.164346	-1.10227	-0.949565	-0.938015	-0.758531	-1.06231	-2.41503	-0.398027	-0.181809	-1.04848	-1.56876	-1.151	-1.13623	-0.868031	-0.343538	0.273001	-0.174654	-0.911609	-0.900521	-0.728211	-1.01985	-0.382117	-0.174542	-1.50606	-0.840834
NaN	1.78751	0.442066	0.163036	1.45041	-1.06962	-0.0411562	1.82518	-0.346509	1.03505	1.57876	1.67842	1.26095	1.16524	2.05416	1.15306	0.288048	1.36282	NaN	1.33971	1.30562	0.903254	-0.495063	-0.218626	1.99247	0.388545	NaN	0.431544	0.159156	-1.13671	-0.0437376	1.78174	-0.368243	1.01041	1.54118	1.23094	NaN	1.30782	1.27454	0.881756	-0.526115	0.379297	0.471467	0.173879	-1.09127	-0.0419894	-0.353523	1.10389	1.34481	1.45345
4.07124	1.47503	3.19793	1.70637	1.78318	2.30752	2.53715	0.822532	2.45593	1.837	2.68376	0.682818	1.53241	2.18593	0.227033	2.56684	3.08997	0.925707	8.02566	1.55808	1.4326	1.75513	2.65385	1.98919	NaN	2.38727	3.97434	3.12182	1.66576	2.2526	2.47676	0.802955	2.39748	1.79328	2.61988	1.49594	7.83464	1.521	1.3985	1.71336	2.59069	2.33045	3.41062	1.81986	2.46099	2.70589	2.61927	1.95917	1.63433	0.987273
-2.45796	-1.33141	-1.85237	-2.21069	-2.5499	-1.8402	-2.09438	-0.954946	0.235039	-2.62675	-1.99876	-0.0825095	-2.63106	-1.47245	-1.46316	-0.776172	-1.47256	-1.66436	-0.773847	-1.96776	1.32003	0.99485	-1.21433	-1.65617	-0.938949	-1.44776	-2.61213	-1.96856	-2.34935	-1.95562	-2.22575	-1.01484	0.229445	-2.7915	-2.12413	-2.79609	-0.822385	-2.09118	1.28861	0.971171	-1.2905	-1.53857	-1.88987	-2.25544	-1.87745	-2.13678	0.250671	-2.67992	-2.68433	-1.69805
4.0924	3.71955	4.88042	3.10271	2.01647	3.09429	4.88092	2.63674	2.79903	2.51697	4.00835	1.9911	2.34948	2.25627	2.67525	2.80014	4.8511	2.46246	4.94297	2.5135	2.8163	3.43538	4.16394	2.59898	5.53694	2.47091	3.995	4.76426	3.02886	3.02064	4.76475	2.57399	2.73241	2.45707	3.91295	2.29356	4.82532	2.45368	2.74927	3.35362	4.06484	2.4121	5.205	3.30907	3.30008	5.20554	2.98518	2.68437	2.50574	2.62623
4.32548	2.28988	3.8324	1.41831	2.26528	2.63347	4.23512	1.84	2.94033	1.77648	3.12468	2.09119	2.1965	3.15107	2.58955	3.18551	3.44068	1.97302	NaN	1.88774	1.36982	2.29056	3.30912	2.68166	NaN	3.08325	4.22252	3.74119	1.38455	2.57079	4.13432	1.7962	2.87035	1.7342	3.05031	2.14422	NaN	1.84281	1.33721	2.23604	3.23036	3.00986	4.08729	1.51264	2.80861	4.51678	3.13589	1.89463	2.34259	2.10423
NaN	0.0220337	-1.7849	-2.62243	-0.831198	-2.37708	-2.46837	-0.652861	-3.31141	-0.819983	-0.995224	-1.83878	-1.56943	-2.56978	-0.694396	-1.16433	NaN	-1.91265	-2.40519	-0.205382	-0.344617	-1.58664	-3.52466	-2.21372	-0.209899	NaN	NaN	-1.89685	-2.78692	-2.52618	-2.62319	-0.69381	-3.51911	-0.871415	-1.05765	-1.66787	-2.55605	-0.218264	-0.366232	-1.68616	-3.74574	NaN	-1.82103	-2.67552	-2.4252	-2.51834	-3.37844	-0.836583	-1.6012	-1.95137
NaN	-0.327169	-1.94684	-1.20495	-2.29132	-3.27723	-2.53686	-0.904128	-2.81158	-1.36407	-2.40818	-0.27542	-1.85873	-2.12893	0.554926	-1.59991	-2.45725	-1.41193	-1.66577	-0.612726	-0.576035	-0.712074	-2.2482	-3.95564	NaN	-1.37361	NaN	-2.06895	-1.28053	-3.48279	-2.69597	-0.960838	-2.98793	-1.44963	-2.55923	-1.97532	-1.77026	-0.651158	-0.612166	-0.756738	-2.38921	-1.45976	-1.98625	-1.22935	-3.34358	-2.58821	-2.86849	-1.39168	-1.89636	-1.44051
-2.78441	-1.25252	-2.98569	-1.44516	-3.17179	-2.26825	-1.36397	-3.6696	-4.37085	-3.09871	-2.08078	-3.84425	-3.88643	-4.17361	-1.86547	-2.09486	-4.89118	-3.50147	-1.79789	-2.80876	-2.39778	-3.64969	-2.67254	-4.51655	-1.23303	-4.80395	-2.95906	-3.17296	-1.5358	-2.41053	-1.44952	-3.89977	-4.64501	-3.29307	-2.2113	-4.13019	-1.91066	-2.98493	-2.54818	-3.87861	-2.84017	-5.10526	-3.04613	-1.47442	-2.31417	-1.39158	-4.45934	-3.16144	-3.9651	-3.57236
NaN	-0.336516	-0.629207	NaN	-2.10852	-0.994658	NaN	-0.235607	-2.99391	-0.674904	0.105341	-3.37382	-1.12253	-2.03193	-1.07522	-0.605895	NaN	-1.99762	NaN	-0.881507	0.2802	NaN	-1.72152	-2.30229	0.289197	-2.22568	NaN	-0.668673	NaN	-1.05705	NaN	-0.250385	-3.1817	-0.717236	0.102834	-1.19294	NaN	-0.936798	0.273531	NaN	-1.8295	-2.36529	-0.641945	NaN	-1.01479	NaN	-3.05452	-0.688566	-1.14526	-2.03806
NaN	1.27678	1.38232	NaN	1.57684	0.442789	NaN	0.710746	NaN	0.131176	1.8482	-0.00318572	0.523347	0.433927	2.70455	1.26885	0.614555	0.795239	NaN	0.0873732	NaN	NaN	-0.78923	0.0893147	NaN	NaN	NaN	1.34942	NaN	0.43225	NaN	0.693829	NaN	0.128054	1.80421	0.510891	NaN	0.0852936	NaN	NaN	-0.838732	NaN	1.47425	NaN	0.472238	NaN	NaN	0.1399	0.558153	0.848128
2.08991	1.90537	2.75317	1.63311	2.45266	2.57743	2.43603	0.662529	1.87491	1.16157	2.14503	-0.0147524	1.49589	1.12685	2.16589	1.2389	2.46164	1.0405	2.63234	1.24786	1.47183	1.36888	2.34113	1.43933	3.69231	1.61483	2.04016	2.68764	1.59424	2.51608	2.37805	0.64676	1.83029	1.13392	2.09398	1.46028	2.56968	1.21816	1.4368	1.33629	2.28541	1.5764	2.93628	1.74172	2.74884	2.59804	1.99961	1.23882	1.59537	1.10971
NaN	-0.673083	-1.22367	-1.02724	-2.27096	-1.39042	NaN	-0.481761	-2.25314	-2.65271	-2.15472	-1.65239	-1.3902	-2.35825	-1.50483	-1.45273	-1.69688	NaN	-1.82588	-2.3808	-0.871064	0.510353	0.0281028	NaN	NaN	-2.72117	NaN	-1.30042	-1.09167	-1.47763	NaN	-0.511978	-2.39447	-2.8191	-2.28988	-1.47739	-1.94041	-2.53014	-0.9257	0.498206	0.0274339	-2.89185	-1.24844	-1.04803	-1.41857	NaN	-2.29876	-2.70641	-1.41834	NaN
NaN	NaN	-0.458957	NaN	-0.87248	-1.31383	-0.312441	NaN	-0.832582	-0.952936	-2.13974	-2.28683	-1.6434	-2.45244	-1.43626	-1.52847	NaN	-1.84871	NaN	-2.52811	NaN	NaN	-0.510423	NaN	-0.928153	NaN	NaN	-0.487745	NaN	-1.39624	-0.332038	NaN	-0.884804	-1.01271	-2.27395	-1.74648	NaN	-2.68668	NaN	NaN	-0.542438	NaN	-0.468249	NaN	-1.34043	-0.318766	-0.849437	-0.972227	-1.67667	-1.88614
NaN	-2.04114	-2.55854	-2.21596	-2.74638	-2.18956	NaN	-2.16337	-1.02352	-1.94234	-2.59308	-1.54511	-1.90837	-2.05909	-2.74183	-2.20675	NaN	-2.00045	NaN	-2.04833	-2.2587	-2.72526	-2.01923	-2.38588	NaN	-2.5578	NaN	-2.71902	-2.35495	-2.32689	NaN	-2.29906	-1.08772	-2.06417	-2.75573	-2.02807	NaN	-2.17681	-2.40037	-2.89619	-2.14588	-2.71823	-2.61033	-2.26082	-2.23388	NaN	-1.04424	-1.98166	-1.94701	-2.04095
-1.57336	-1.21534	-3.6584	-2.13004	-1.84322	-0.784684	-2.42848	-0.962306	-2.97505	-1.98705	-1.99807	-1.82673	-1.72116	-1.56567	NaN	-2.26258	3.535	-1.81764	0.658662	-0.830114	-1.15524	-1.91837	-2.45749	-2.92104	-1.77761	-2.57791	-1.67204	-3.88786	-2.26364	-0.833902	-2.5808	-1.02267	-3.16166	-2.11168	-2.1234	-1.82912	0.642985	-0.882182	-1.2277	-2.0387	-2.61163	-2.7396	-3.73246	-2.17316	-0.800569	-2.47764	-3.03528	-2.02727	-1.756	-1.85444
-1.22105	-1.1813	NaN	NaN	-1.31188	NaN	-0.991778	-0.884404	-0.944684	NaN	-0.660739	-0.644171	-1.49701	-1.55605	NaN	-1.54309	-1.63508	-1.53164	NaN	-1.35432	NaN	NaN	-1.97894	-1.16175	-1.35689	-1.37547	-1.29763	NaN	NaN	NaN	-1.05398	-0.939877	-1.00394	NaN	-0.702182	-1.59091	NaN	-1.43926	NaN	NaN	-2.10306	-1.46175	NaN	NaN	NaN	-1.01186	-0.963809	NaN	-1.52732	-1.56265
NaN	0.485109	0.0353484	0.525136	-1.18977	-1.27636	-0.913344	1.00049	-0.737059	0.0625084	-1.15116	-0.615405	-0.434546	-0.79933	0.28194	-0.1647	-1.07746	-0.140541	-0.363368	0.177628	0.358185	0.549925	-0.293087	-2.2852	0.20032	-0.669515	NaN	0.0345071	0.512637	-1.35642	-0.970632	0.97668	-0.78329	0.0610206	-1.22336	-0.461802	-0.38616	0.1734	0.349659	0.536836	-0.31147	-0.711509	0.0376994	0.560061	-1.3022	-0.931834	-0.75198	0.0666656	-0.443343	-0.143386
-1.40876	1.45064	0.662108	1.44722	0.658466	-0.237428	1.69101	0.0494804	1.6357	1.10035	0.173703	0.0955392	0.789117	0.672149	0.491106	1.9073	1.91628	0.716795	1.44683	0.0443185	1.00676	1.41268	2.26494	0.4793	0.993771	0.4302	-1.49712	0.646349	1.41278	-0.25232	1.65076	0.0483027	1.59677	1.07416	0.169569	0.770335	1.41239	0.0432636	0.9828	1.37905	2.21103	0.419961	0.706143	1.54347	-0.242235	1.80347	1.74449	1.17353	0.841599	0.764467
NaN	-0.638246	-0.185454	NaN	-0.615542	-0.317907	-0.648021	-0.936533	-0.0590808	-0.377433	-0.548848	-0.0408802	-1.13396	-0.205086	-0.895425	NaN	NaN	-0.750146	-0.580041	-0.810119	-1.15329	-0.305861	-0.122377	NaN	-0.693197	NaN	NaN	-0.197086	NaN	-0.337847	-0.688667	-0.995276	-0.0627865	-0.401106	-0.583273	-1.20508	-0.616423	-0.860932	-1.22563	-0.325045	-0.130053	NaN	-0.189208	NaN	-0.324343	-0.66114	-0.0602768	-0.385073	-1.15692	-0.765332
0.659456	0.488497	0.558408	0.356009	-0.0715677	-0.743882	-1.91824	0.391173	0.202184	-0.0746289	-0.5338	0.0721489	0.161018	0.326147	0.518456	0.221861	-0.0440041	0.336371	-1.14364	0.212217	0.0853084	0.0550879	-0.146938	-0.637954	0.0927737	0.298421	0.643761	0.545118	0.347536	-0.79054	-2.03856	0.381862	0.197372	-0.0793099	-0.567281	0.157185	-1.21537	0.207166	0.0832779	0.0537767	-0.156154	0.291318	0.595547	0.379687	-0.758941	-1.95708	0.215631	-0.0761397	0.171727	0.358743
0.249451	-0.138998	0.149493	-0.298921	-0.231481	-0.364046	NaN	-0.447508	-0.0136868	-0.182268	-0.350885	-0.0782467	-0.197859	-0.389436	0.00921487	-0.0376546	-0.381404	-0.0488192	-1.05335	-0.303384	-0.446347	-0.25251	-0.35189	-0.382014	-0.267036	0.103367	0.243514	0.145935	-0.31767	-0.38688	NaN	-0.475577	-0.0145453	-0.193701	-0.372894	-0.210269	-1.11942	-0.322413	-0.474343	-0.268348	-0.373961	0.100907	0.159435	-0.304972	-0.371415	NaN	-0.0139639	-0.185958	-0.201864	-0.0498075
NaN	0.119088	0.498532	-0.0593496	-0.417811	-0.65086	-1.67477	-0.113126	0.142773	-0.364593	-1.00008	0.0932542	-0.157788	-0.22196	-0.071387	0.072423	NaN	-0.223992	-1.08705	-0.507284	0.0225628	-0.0317316	-0.0148864	-0.706267	0.366548	0.0588528	NaN	0.486666	-0.0630722	-0.691684	-1.77982	-0.120221	0.139375	-0.387462	-1.06281	-0.167685	-1.15523	-0.539103	0.0220258	-0.0337219	-0.0158201	0.057452	0.531687	-0.0605511	-0.664036	-1.70868	0.152268	-0.371974	-0.160982	-0.228526
NaN	-0.0856872	NaN	-0.455486	-0.829617	-1.6512	-0.242562	0.767848	-0.528998	0.889345	NaN	0.665997	-0.673257	0.597722	-0.592945	-0.93688	NaN	1.16754	-1.0133	0.675851	NaN	1.38662	-0.247137	-1.24239	NaN	0.135607	NaN	NaN	-0.484056	-1.75477	-0.257776	0.749572	-0.562178	0.868177	NaN	-0.715486	-1.07685	0.659765	NaN	1.35362	-0.262638	0.132379	NaN	-0.464707	-1.68462	-0.247473	-0.539707	0.948492	-0.686887	1.24519
0.1426	-0.1034	0.197109	-0.265831	-0.376791	0.402691	0.174546	-0.527891	-0.223352	0.0485581	-0.000172908	-1.81049	0.00515824	-0.264116	-0.333581	-0.393235	-0.212694	0.032064	0.0212388	0.0259033	-0.15043	0.0257602	0.133093	0.0044523	-0.388383	0.237509	0.139206	0.192417	-0.282505	0.393107	0.170392	-0.561002	-0.237361	0.0474024	-0.000183754	0.00503546	0.0207333	0.0252868	-0.159865	0.0251471	0.129926	0.231856	0.210218	-0.271213	0.429473	0.186155	-0.227873	0.0517876	0.0055013	0.0341965
NaN	-0.562422	-1.51999	-1.76063	-1.48872	NaN	NaN	0.693359	-1.96583	NaN	-1.89951	-1.31524	0.249336	-3.39043	-2.29326	NaN	NaN	NaN	NaN	-1.84426	NaN	-1.6857	-2.14764	-0.267124	2.56798	NaN	NaN	-1.61533	-1.87106	NaN	NaN	0.676856	-2.08913	NaN	-2.01866	0.243401	NaN	-1.95994	NaN	-1.79143	-2.28235	NaN	-1.55076	-1.79627	NaN	NaN	-2.00563	NaN	0.265918	NaN
NaN	1.71446	0.48644	NaN	3.0019	-0.88338	NaN	1.99622	1.13212	1.4466	0.669033	1.48685	1.93956	2.54889	1.36608	0.307657	NaN	1.72112	2.0208	0.336058	1.60013	NaN	1.16516	NaN	2.48835	1.73232	NaN	0.474862	NaN	-0.938789	NaN	1.94871	1.10517	1.41217	0.653109	1.89339	1.9727	0.328059	1.56205	NaN	1.13743	1.69108	0.518792	NaN	-0.901264	NaN	1.20741	1.54281	2.06855	1.83558
-0.570765	-1.29445	NaN	-1.55544	-0.696844	-0.394497	-1.00384	-1.38342	-0.713233	-1.67355	-0.469256	-0.777857	NaN	-0.684885	-1.06879	-0.394985	-0.464869	NaN	NaN	-1.1935	-1.33627	-1.77741	-0.787617	-0.760182	NaN	NaN	-0.606565	NaN	-1.653	-0.419241	-1.06681	-1.47019	-0.757969	-1.77852	-0.498689	NaN	NaN	-1.26836	-1.42009	-1.88889	-0.837019	NaN	NaN	-1.58693	-0.402483	-1.02416	-0.727672	-1.70743	NaN	NaN
-3.59748	-3.19117	-2.83927	-3.89175	-3.63341	-1.62607	-2.35138	0.401668	-1.8115	-3.69641	-2.53044	-3.27659	-3.71241	-3.08776	-2.5877	-1.97562	-2.6961	-3.85469	-3.17582	-3.3284	-3.27393	-0.122619	-2.18931	-2.72396	-3.1819	-3.07373	-3.82313	-3.01736	-4.13585	-1.72806	-2.49887	0.392108	-1.92512	-3.92826	-2.68916	-3.94526	-3.37502	-3.53717	-3.47929	-0.13031	-2.32663	-3.26652	-2.89675	-3.97054	-1.65899	-2.39898	-1.84817	-3.77124	-3.78756	-3.93272
NaN	-0.128937	NaN	NaN	NaN	-1.10081	0.379009	1.22421	-0.0530238	1.09164	0.140781	1.19359	1.33516	NaN	-0.302898	-1.51458	0.313987	1.34354	NaN	1.22632	0.731113	1.02482	0.452699	0.807421	NaN	0.428106	NaN	NaN	NaN	-1.16986	0.369988	1.19507	-0.0563496	1.06565	0.13743	1.30338	NaN	1.19713	0.713712	1.00042	0.441924	0.417917	NaN	NaN	-1.1231	0.404216	-0.0540972	1.16424	1.42396	1.43289
NaN	-0.321347	-0.344344	0.854947	0.747206	-0.133454	NaN	NaN	-0.240829	0.343124	-0.781043	-0.0789668	NaN	-0.231827	-0.760758	-1.5151	0.590117	0.0417352	1.1128	0.539375	0.493656	NaN	0.481459	-0.185148	NaN	-0.0320192	NaN	-0.365943	0.834598	-0.141825	NaN	NaN	-0.255935	0.334957	-0.830032	NaN	1.08631	0.526538	0.481906	NaN	0.47	-0.0340276	-0.351315	0.911807	-0.136156	NaN	-0.245704	0.365944	NaN	0.0445108
NaN	0.237726	NaN	0.0968283	-0.51014	-0.796945	0.199235	0.47917	0.461995	NaN	-0.385689	0.912844	0.0893039	0.823439	-0.112224	0.466772	0.0271384	0.498921	NaN	0.313602	0.0527166	0.515735	0.959162	0.121957	NaN	NaN	NaN	NaN	0.0945237	-0.846932	0.194493	0.467765	0.450999	NaN	-0.409881	0.0871783	NaN	0.306138	0.0514619	0.50346	0.936332	NaN	NaN	0.103268	-0.813079	0.212485	0.492721	NaN	0.0952432	0.532103
-0.577441	-1.09819	-1.65356	-0.727743	-0.791657	-0.689694	-0.966717	-0.156124	-1.01042	-0.766552	-0.911569	-0.593811	-0.772509	-0.378104	-1.19866	-1.31768	-0.527794	-0.516172	-0.535134	-0.656847	-0.544079	-0.465138	-0.567474	-0.65987	-0.903436	-1.00677	-0.61366	-1.75728	-0.77339	-0.732953	-1.02735	-0.165916	-1.0738	-0.814632	-0.968746	-0.820963	-0.5687	-0.698046	-0.578206	-0.494313	-0.603068	-1.06992	-1.68704	-0.742476	-0.703656	-0.986287	-1.03088	-0.78207	-0.788148	-0.526622
NaN	0.263133	0.936542	1.11292	1.9337	0.213326	NaN	0.822434	1.86659	1.13216	1.08527	1.89385	0.90748	1.25432	0.95258	0.0906517	1.61329	1.00241	NaN	0.936079	0.481293	NaN	0.379566	1.40301	-0.0516328	1.31167	NaN	0.914251	1.08643	0.208249	NaN	0.802859	1.82216	1.10522	1.05944	0.88588	NaN	0.913799	0.469837	NaN	0.370532	1.28045	0.998829	1.18694	0.227514	NaN	1.99073	1.20746	0.967833	1.06908
-2.00932	-0.621547	-1.27438	-1.30947	-2.06527	-1.16452	-1.55834	-2.11888	-0.588599	-1.29236	-2.0191	0.265847	-1.92263	-1.01168	-1.01849	-0.405328	-0.975462	-0.91996	-0.630431	-1.4238	-1.79557	-1.38166	-0.532906	-1.38472	-1.14379	-0.983945	-2.13535	-1.35431	-1.39161	-1.23756	-1.65609	-2.25179	-0.625518	-1.37342	-2.14575	-2.04323	-0.669974	-1.5131	-1.90819	-1.46832	-0.566332	-1.04566	-1.30018	-1.33598	-1.1881	-1.58989	-0.600515	-1.31852	-1.96156	-0.938584
NaN	3.1804	2.26112	NaN	NaN	NaN	2.99032	2.65921	2.95846	2.47167	1.36347	3.58483	3.85761	3.38018	2.39174	1.83846	3.46178	4.05462	NaN	3.56839	2.25418	3.13447	2.71104	1.9842	NaN	2.97014	NaN	2.2073	NaN	NaN	2.91915	2.59592	2.88804	2.41284	1.33101	3.76579	NaN	3.48345	2.20052	3.05986	2.64652	2.89945	2.4115	NaN	NaN	3.1892	3.15522	2.63605	4.11417	4.32428
NaN	-0.0661726	0.0366152	-0.0252536	0.0964744	0.0986852	0.223289	0.0480407	0.0953063	0.0269715	0.367618	-0.115082	0.552296	0.145124	-0.0820299	0.00443856	0.0589834	-0.0244965	0.254915	-0.0506853	-0.0661472	NaN	0.144464	0.0300256	0.399652	-0.170845	NaN	0.0357437	-0.0268376	0.0963363	0.217974	0.0468973	0.0930379	0.0263295	0.358868	0.539151	0.248848	-0.0538644	-0.0702962	NaN	0.141025	-0.181561	0.0390503	-0.0257649	0.105248	0.238139	0.101645	0.0287653	0.589028	-0.0249924
NaN	0.0422775	0.351291	0.062924	0.274127	0.454638	0.213226	0.11033	0.214944	0.0512208	0.669526	-0.232544	0.181178	-0.468847	0.522874	0.102249	0.635677	NaN	NaN	-0.0811734	NaN	NaN	0.242625	0.0800746	NaN	-0.143689	NaN	0.34293	0.0614263	0.443817	0.208151	0.107704	0.209828	0.0500017	0.65359	0.176866	NaN	-0.0862649	NaN	NaN	0.236851	-0.152701	0.374654	0.0671089	0.484874	0.227407	0.229239	0.0546274	0.193228	NaN
NaN	NaN	NaN	-0.189283	0.303069	0.0418312	-0.681279	-0.184835	0.138468	NaN	-0.190357	0.0898911	0.0265616	0.228796	0.219604	0.220421	-0.234694	NaN	NaN	-0.185907	-0.306934	NaN	0.38725	-0.132856	NaN	NaN	NaN	NaN	-0.201156	0.0408356	-0.724011	-0.196429	0.135172	NaN	-0.202297	0.0259294	NaN	-0.197568	-0.326185	NaN	0.378033	NaN	NaN	-0.193115	0.0446133	-0.695071	0.147677	NaN	0.0283281	NaN
4.39123	2.4482	2.59343	2.93149	NaN	1.36005	4.28129	3.99797	1.62657	2.75068	2.49335	3.0355	2.80233	2.47128	1.54042	1.42832	2.48216	2.72807	4.23144	2.87227	3.21542	2.93863	3.5699	2.68876	3.94597	2.8881	4.28671	2.5317	2.86172	1.32768	4.17939	3.90282	1.58785	2.68521	2.43401	2.73563	4.13073	2.8039	3.13888	2.86869	3.48493	2.81936	2.76591	3.12645	1.4505	4.56603	1.73475	2.93362	2.9887	2.90951
NaN	1.32992	0.354675	2.34842	4.39187	1.06876	3.36763	2.12935	2.38623	1.81101	1.14129	2.15075	2.40832	1.16395	0.843272	0.852759	1.13154	2.2416	2.7775	2.62427	1.6778	1.78143	2.17703	1.49586	2.88452	2.86242	NaN	0.346233	2.29253	1.04332	3.28747	2.07867	2.32943	1.76791	1.11412	2.351	2.7114	2.56181	1.63786	1.73903	2.12521	2.79429	0.378263	2.50461	1.13984	3.5916	2.54493	1.93146	2.56849	2.39068
NaN	-1.70427	-1.11277	-1.35345	-1.2639	-1.6001	NaN	-0.412843	-2.2977	-1.53766	-1.89885	-3.60478	NaN	-1.35044	-1.61135	-2.04274	-2.48267	NaN	-1.9515	-1.52055	NaN	NaN	-3.17091	-2.08947	-1.96211	-1.55514	NaN	-1.18257	-1.43834	-1.70047	NaN	-0.438738	-2.44182	-1.63411	-2.01795	NaN	-2.0739	-1.61592	NaN	NaN	-3.3698	-1.65268	-1.1353	-1.38085	-1.6325	NaN	-2.34421	-1.56879	NaN	NaN
NaN	-0.71894	-0.217064	-0.885417	-1.05738	-0.199462	-0.203328	0.189272	NaN	-0.777178	-0.82046	-1.70465	NaN	NaN	-0.52352	NaN	-0.538104	-1.08511	NaN	NaN	-0.495361	NaN	-0.327588	-0.85111	NaN	NaN	NaN	-0.230679	-0.940953	-0.211973	-0.216082	0.184767	NaN	-0.825925	-0.871922	NaN	NaN	NaN	-0.526432	NaN	-0.348135	NaN	-0.221458	-0.903341	-0.2035	-0.207445	NaN	-0.792911	NaN	-1.10708
NaN	-0.453572	0.570028	-0.324235	-0.401881	0.108601	-0.117612	-0.682251	-0.0179326	-0.384867	0.186999	NaN	-0.678579	-0.483652	-0.751541	0.0544284	NaN	-0.378123	NaN	-0.629802	-0.602861	NaN	-0.289508	0.289074	NaN	-0.0128249	NaN	0.55646	-0.344572	0.106016	-0.124989	-0.725044	-0.0190574	-0.409007	0.182549	-0.721141	NaN	-0.669306	-0.640675	NaN	-0.307667	-0.0136293	0.607938	-0.330799	0.115824	-0.119993	-0.0182957	-0.392658	-0.692316	-0.385778
0.0316874	-0.209882	-0.0227047	-0.845881	-0.290075	-0.425118	-0.865702	-0.525349	-0.452715	-0.683718	-0.23373	-0.0981661	-0.336915	-0.356555	-0.354226	-0.588742	-0.944306	-0.288422	-1.12405	-0.537629	-0.537739	-0.695397	-0.943698	-0.358191	-0.581162	-0.431093	0.0309332	-0.0241289	-0.898937	-0.451783	-0.920001	-0.558301	-0.481111	-0.726603	-0.248391	-0.358048	-1.19455	-0.571351	-0.571468	-0.739015	-1.00289	-0.458132	-0.0231644	-0.863005	-0.433724	-0.883227	-0.46188	-0.69756	-0.343736	-0.294261
-2.05058	0.0906723	-0.147128	-2.12652	-1.86147	NaN	-0.221114	0.566854	0.088145	2.15421	-0.456128	-0.708224	0.563864	0.955347	-0.707592	-1.68079	-0.415934	NaN	NaN	-0.586009	0.784983	NaN	-0.296081	-0.566548	NaN	NaN	-2.1792	-0.156356	-2.2599	NaN	-0.234983	0.553362	0.086047	2.10293	-0.484737	0.550444	NaN	-0.622766	0.7663	NaN	-0.314652	NaN	-0.150107	-2.16957	NaN	-0.22559	0.0940073	2.29748	0.601365	NaN
NaN	-0.876146	-1.78794	-2.00069	NaN	-1.93007	-2.90838	-0.311291	-2.05757	-1.14318	-1.64626	-1.39095	0.175788	-1.86498	-1.33721	-1.65328	-2.14332	-1.08095	-1.74722	NaN	-0.637753	-0.89626	-1.88102	NaN	-1.6331	-1.35847	NaN	-1.90009	-2.12618	-2.05113	-3.0908	-0.330816	-2.18663	-1.21488	-1.74952	0.171604	-1.85682	NaN	-0.677754	-0.952476	-1.999	-1.44368	-1.82414	-2.04119	-1.96915	-2.96725	-2.09923	-1.16632	0.187479	-1.10283
NaN	1.75576	NaN	1.57556	2.78825	3.15967	3.7708	1.75718	0.985056	1.96959	1.37499	1.36607	2.41084	2.40148	1.56596	-0.279656	2.29634	NaN	NaN	1.03037	2.20597	1.84678	2.49919	3.40454	NaN	NaN	NaN	NaN	1.53806	3.08446	3.68105	1.71535	0.96161	1.92271	1.34226	2.35346	NaN	1.00585	2.15346	1.80282	2.4397	NaN	NaN	1.68034	3.36981	4.02159	1.05057	2.10058	2.57118	NaN
NaN	1.40133	1.87013	1.49422	1.45939	1.31047	1.60931	1.31279	1.51767	0.942601	2.00544	1.11445	1.55006	1.75458	1.61811	1.61214	2.23146	1.18732	2.80783	1.06617	1.13487	1.66271	1.75723	1.7349	NaN	1.59201	NaN	1.82562	1.45866	1.27928	1.571	1.28154	1.48155	0.920166	1.95771	1.51317	2.741	1.04079	1.10786	1.62314	1.7154	1.55411	1.9945	1.5936	1.39762	1.71634	1.61861	1.00529	1.65315	1.26628
3.49161	2.14183	1.43533	0.461391	1.08617	-0.58527	1.67207	2.06558	-0.0400914	1.74022	2.03902	1.765	2.33696	2.09936	1.94173	1.03693	0.302434	2.10186	0.664667	1.82595	1.81705	1.86482	0.333851	0.155498	2.46568	1.41821	3.4085	1.40117	0.450409	-0.62198	1.63228	2.01642	-0.0426061	1.6988	1.99049	2.28134	0.648847	1.78249	1.7738	1.82044	0.325905	1.38445	1.53079	0.492077	-0.597118	1.78328	-0.040903	1.85596	2.49239	2.24165
-0.352019	-0.206591	-0.976807	-0.548594	-0.371503	-0.209501	-0.629106	-0.216635	-0.440678	-0.420523	-0.398098	0.0528342	-0.625954	-0.60921	-0.781598	-0.847373	-0.674226	-0.5282	-0.281683	-0.237795	-0.245677	-0.829742	-0.353105	-0.664834	-0.300314	-0.532736	-0.374099	-1.03808	-0.583003	-0.222642	-0.668566	-0.230223	-0.468319	-0.446899	-0.423068	-0.665215	-0.299351	-0.252711	-0.261086	-0.881786	-0.375253	-0.566151	-0.996581	-0.559699	-0.213742	-0.641842	-0.449599	-0.429036	-0.638625	-0.538893
NaN	-1.07249	NaN	-0.855835	-0.73145	0.198846	NaN	-0.68567	-0.89423	-0.652759	-0.884239	-0.707628	-0.99356	NaN	-1.24933	-1.04674	NaN	-1.02809	NaN	NaN	-1.0269	-0.717754	-0.648382	-0.980506	NaN	-0.975727	NaN	NaN	-0.909516	0.194114	NaN	-0.728678	-0.950319	-0.693702	-0.939701	-1.05588	NaN	NaN	-1.09131	-0.762774	-0.689051	-1.03693	NaN	-0.873161	0.212071	NaN	-0.912333	-0.665973	-1.01367	-1.0489
NaN	0.75522	-0.909562	-0.106026	-0.629772	-1.7966	-1.21046	0.310879	-0.074189	0.283872	-0.930064	0.155559	0.0581508	-0.132667	0.553221	-0.442796	-0.343435	0.415279	-1.01983	0.564621	0.0801575	0.582617	-0.294239	-1.29553	-0.306084	0.389283	NaN	-0.966612	-0.112676	-1.90929	-1.28638	0.303479	-0.0788424	0.277115	-0.988401	0.0567667	-1.0838	0.551182	0.0782496	0.568749	-0.312695	0.380018	-0.927975	-0.108173	-1.83298	-1.23496	-0.0756909	0.302751	0.0620182	0.442898
2.85119	0.995199	1.57616	-0.725477	1.20408	-1.12611	0.309178	-0.0319285	-0.298648	0.632453	1.12868	1.72104	1.45907	0.648669	0.936345	0.0615586	-1.05414	0.810149	NaN	1.45052	0.101988	0.315271	-0.685611	NaN	1.59604	1.01963	2.78333	1.53864	-0.770981	-1.19674	0.301819	-0.0339311	-0.31738	0.6174	1.10182	1.42434	NaN	1.41599	0.0995607	0.307767	-0.728615	0.995364	1.68098	-0.740164	-1.1489	0.329741	-0.304694	0.674516	1.5561	0.86403
NaN	-0.246718	-0.457214	-0.326492	0.00729202	-0.112548	NaN	0.189621	-0.23232	0.170028	-0.558752	0.15921	NaN	0.275975	-0.376998	-0.111676	NaN	-0.124204	NaN	0.0362438	-0.0868803	NaN	-0.150776	0.0283528	NaN	-0.325765	NaN	-0.485892	-0.346971	-0.119607	NaN	0.185108	-0.246892	0.165981	-0.593799	NaN	NaN	0.0353812	-0.0923297	NaN	-0.160234	-0.346198	-0.46647	-0.333102	-0.114827	NaN	-0.237023	0.181336	NaN	-0.126718
-1.4898	-0.808818	-0.41756	-0.99058	-0.879448	-0.661492	-0.853341	-0.301816	0.354511	-0.740706	-0.923343	0.312387	-1.07996	-1.26107	-0.222852	0.0290817	-0.195839	-0.890578	-0.734583	-0.599569	-1.13134	-0.183938	-0.374686	-0.184005	0.0687748	-0.306543	-1.58325	-0.443751	-1.05271	-0.702983	-0.906865	-0.320747	0.346073	-0.787165	-0.981258	-1.1477	-0.780659	-0.637175	-1.2023	-0.195475	-0.398187	-0.32577	-0.426013	-1.01063	-0.674883	-0.870616	0.378089	-0.7557	-1.10182	-0.908607
0.352844	-0.103722	0.139876	-0.132964	-0.180767	0.268536	0.30116	-0.381971	0.0550439	0.0422881	0.449724	-0.498079	0.0139339	0.00925189	-0.306318	-0.0200191	-0.0147396	0.00959689	0.871524	-0.132736	-0.0828167	-0.0942588	0.312223	-0.0133257	0.151886	0.0158463	0.344446	0.136547	-0.141304	0.262144	0.293992	-0.405929	0.0537338	0.0412816	0.43902	0.0136023	0.850781	-0.141062	-0.0880112	-0.100171	0.304792	0.0154692	0.149179	-0.135656	0.286395	0.321189	0.0587047	0.0451006	0.0148606	0.0102351
NaN	-0.589568	-0.0416951	-0.993409	-0.18452	0.374287	0.304837	-0.968486	-0.62036	-0.345347	0.430548	-0.853914	-0.760099	-0.378846	0.0311367	-0.141982	-0.0441925	-0.711859	-0.0638091	-0.592894	-0.956052	-0.495279	-0.366181	-0.25491	0.175536	-0.267833	NaN	-0.0443104	-1.05572	0.365379	0.297581	-1.02923	-0.659271	-0.367008	0.4203	-0.807775	-0.0678114	-0.630082	-1.01602	-0.526345	-0.389149	-0.284632	-0.0425392	-1.01352	0.39918	0.32511	-0.632919	-0.352338	-0.775487	-0.72627
NaN	1.47191	-0.0848161	NaN	-1.22394	NaN	-1.39086	1.61393	-1.03588	0.489389	0.490057	NaN	NaN	0.487172	1.34328	0.461404	NaN	1.89817	NaN	0.562915	NaN	NaN	-1.17416	-1.48539	2.27466	-0.156285	NaN	-0.0901361	NaN	NaN	-1.4781	1.57552	-1.10085	0.477741	0.478393	NaN	NaN	0.549517	NaN	NaN	-1.2478	-0.166088	-0.0865332	NaN	NaN	-1.41902	-1.05685	0.521937	NaN	2.02441
NaN	1.23765	-0.111802	0.261363	0.298135	-1.10251	0.0176851	1.57416	-0.872605	0.809884	0.545634	1.56156	1.03957	0.486376	0.979005	0.420682	NaN	1.30731	NaN	1.0182	1.00567	0.887734	-1.12515	-0.515351	0.991811	-0.253568	NaN	-0.118815	0.255142	-1.17166	0.0172641	1.53669	-0.927338	0.790608	0.532647	1.01483	NaN	0.993968	0.981734	0.866605	-1.19572	-0.269472	-0.114065	0.278745	-1.12483	0.0188612	-0.890271	0.863747	1.10871	1.39426
-1.9653	-1.16643	-2.87051	-2.34577	-1.65166	-1.95145	-2.51457	-1.72833	-2.52906	-1.25363	-1.6108	-2.06433	-2.65857	-2.54836	-2.36808	-2.14906	-3.25406	-2.48534	-2.0477	-1.89706	-1.49598	-2.51769	-1.65018	-3.43429	-0.528768	-2.73572	-2.08856	-3.05056	-2.4929	-2.07385	-2.67229	-1.83674	-2.68769	-1.33226	-1.71183	-2.82532	-2.17614	-2.01605	-1.58981	-2.67561	-1.75368	-2.90731	-2.92862	-2.39325	-1.99096	-2.56548	-2.58026	-1.27901	-2.71239	-2.53565
NaN	-0.463124	-1.35828	-1.00883	-0.166616	-1.78952	NaN	-0.452101	0.066048	-0.48511	-0.856739	0.162647	-0.453791	-0.712226	-1.02923	-1.08247	-1.63804	0.34531	-1.87273	-0.558172	-1.06433	-0.723801	-1.19048	-1.80175	-1.57687	-0.993839	NaN	-1.44347	-1.07211	-1.90176	NaN	-0.480458	0.064476	-0.515538	-0.910477	-0.482254	-1.99019	-0.593183	-1.13109	-0.7692	-1.26515	-1.05618	-1.38577	-1.02925	-1.82575	NaN	0.0704407	-0.494931	-0.462978	0.368276
NaN	-0.812253	-2.42577	-1.85311	-0.938496	-0.509972	-2.69377	-1.29775	-1.01998	-1.00294	-1.92857	-1.34345	-1.43809	-1.95377	-1.46914	-1.78693	-0.888682	-0.700879	NaN	-1.5373	-1.40378	-1.79972	-1.54246	-2.52832	-1.24308	-1.77966	NaN	-2.57792	-1.96935	-0.541959	-2.86273	-1.37914	-1.08396	-1.06584	-2.04953	-1.52829	NaN	-1.63372	-1.49183	-1.9126	-1.6392	-1.89129	-2.47487	-1.89063	-0.520296	-2.7483	-1.04063	-1.02324	-1.4672	-0.715068
0.314447	0.900883	NaN	0.469334	-0.131179	NaN	0.559115	1.55606	0.24437	0.987827	1.33755	0.357847	0.84053	0.125324	0.272897	0.144099	NaN	0.709257	NaN	0.337191	1.18879	NaN	0.205073	0.271089	0.964223	NaN	0.306962	NaN	0.458164	NaN	0.545807	1.51903	0.238554	0.964315	1.30571	0.820525	NaN	0.329165	1.16049	NaN	0.200192	NaN	NaN	0.500548	NaN	0.5963	0.260623	1.05352	0.896432	0.756428
NaN	-0.434896	NaN	NaN	NaN	-0.739529	NaN	-0.299801	0.762338	0.366034	-0.281156	-0.511856	0.670928	-0.509433	-0.868719	-0.556807	NaN	1.15876	NaN	-0.195503	0.0911283	-0.554518	-0.00222787	NaN	NaN	NaN	NaN	NaN	NaN	-0.785914	NaN	-0.318605	0.744194	0.357322	-0.298791	0.654959	NaN	-0.207766	0.0889594	-0.589299	-0.00236761	NaN	NaN	NaN	-0.7545	NaN	0.813039	0.390378	0.715549	1.23582
NaN	-0.750269	-1.48575	-0.6776	-2.33648	-1.22523	-0.987053	-0.932957	0.0970424	-0.0505004	-0.824938	-0.921037	0.168657	-0.238913	NaN	-0.907704	NaN	0.524477	-1.63724	-0.125098	-0.395021	-0.535924	-0.440698	-1.76966	-2.52922	-0.483305	NaN	-1.57894	-0.720101	-1.30208	-1.04896	-0.991475	0.0947327	-0.0536679	-0.876681	0.164643	-1.73994	-0.132945	-0.419798	-0.569539	-0.468339	-0.513619	-1.51582	-0.691317	-1.25003	-1.00703	0.103496	-0.0515227	0.179874	0.559358
-0.147147	-0.335203	-0.000609675	0.22205	-0.216232	-0.0832622	0.199294	-0.103128	-0.0930236	0.132403	-0.389434	-0.189276	0.0748853	0.00118544	-0.864963	-0.832619	-0.567086	-0.48765	0.00713768	-0.232818	-0.250382	-0.294797	0.198667	-0.509399	-0.578011	-0.526702	-0.156377	-0.000647916	0.216765	-0.0884847	0.194551	-0.109597	-0.0988583	0.129251	-0.413861	0.0731029	0.00696779	-0.247422	-0.266086	-0.313288	0.193938	-0.559739	-0.000622018	0.236817	-0.0849478	0.212549	-0.0949068	0.141208	0.0798657	-0.497522
-0.249394	-0.142905	0.0776795	0.267319	0.0221762	0.577578	0.211341	-0.1395	0.116193	-0.116016	0.0301968	-0.0599819	-0.00352539	0.211012	-0.338615	-0.160981	0.250689	-0.242019	0.569926	0.0261615	-0.159968	0.092733	0.470741	-0.0681811	-0.22012	0.128167	-0.265037	0.0758306	0.260956	0.563831	0.20631	-0.14825	0.113427	-0.123293	0.0294781	-0.00374652	0.556361	0.0255388	-0.170002	0.0905259	0.459537	0.125116	0.0828457	0.285097	0.615991	0.225396	0.12392	-0.118364	-0.00359676	-0.246918
-0.298685	0.346456	-0.0696435	0.358135	0.126891	0.621243	0.536764	0.311944	0.175298	0.218941	0.432662	0.669969	0.30339	0.654314	0.34132	0.328194	0.454259	0.181314	0.694098	0.420494	-0.0298431	0.130107	0.727622	0.566971	-0.129553	0.239268	-0.31742	-0.0740118	0.349611	0.606456	0.523989	0.304519	0.171126	0.213729	0.422364	0.296169	0.677577	0.410486	-0.0317149	0.12701	0.710303	0.233573	-0.0710534	0.381954	0.66256	0.572463	0.186957	0.233502	0.323567	0.193373
NaN	-0.100988	0.758517	1.41431	0.704982	0.868198	0.928507	0.398063	1.44307	0.933479	0.267447	-0.137439	0.484974	0.526687	-0.016892	0.676603	NaN	0.821063	-0.361228	0.472174	0.719798	1.31469	1.52943	1.2885	NaN	0.955733	NaN	0.740463	1.38065	0.847534	0.906408	0.388589	1.40872	0.91126	0.261082	0.473431	-0.383886	0.460936	0.702666	1.2834	1.49303	0.932985	0.808964	1.50837	0.925939	0.99026	1.53904	0.995561	0.517228	0.87567
NaN	-0.31457	-0.0896159	NaN	NaN	0.194652	0.274974	-0.597458	NaN	NaN	-0.00408525	NaN	-0.203958	-0.804982	-0.250076	-0.148789	-0.495248	-0.232159	0.0736303	-0.125035	-0.344735	-0.674002	-0.357184	-0.0563651	NaN	-0.129421	NaN	-0.0952369	NaN	0.19002	0.268429	-0.634933	NaN	NaN	-0.00434149	-0.216751	0.0718778	-0.132878	-0.366358	-0.716277	-0.379587	-0.137539	-0.0914301	NaN	0.207598	0.293261	NaN	NaN	-0.208087	-0.236859
NaN	1.21621	-0.568488	-1.01033	0.397133	-1.98253	-1.28285	0.837597	-1.41809	0.955948	0.356743	1.01858	1.19719	0.570207	0.826348	-0.414099	-1.98636	1.30476	2.51993	1.26612	0.919115	0.792097	-1.08422	-1.44431	NaN	0.312227	NaN	-0.604145	-1.0737	-2.10688	-1.36331	0.817661	-1.50703	0.933195	0.348252	1.1687	2.45995	1.23598	0.897239	0.773244	-1.15222	0.304795	-0.579996	-1.03078	-2.02267	-1.30882	-1.4468	1.01953	1.27681	1.39154
NaN	1.64812	NaN	NaN	NaN	NaN	-1.24779	0.717744	NaN	0.972566	0.839292	0.912543	0.125917	0.691462	NaN	NaN	NaN	-0.00635503	0.434811	0.231315	0.17138	0.306968	1.58993	-1.25241	-0.0184061	-0.951517	NaN	NaN	NaN	NaN	-1.32606	0.70066	NaN	0.949417	0.819316	0.12292	0.424462	0.225809	0.167301	0.299662	1.55209	-1.0112	NaN	NaN	NaN	-1.27305	NaN	1.03725	0.134291	-0.00648368
NaN	1.52048	2.37569	0.939045	1.2438	2.33992	2.68627	0.460377	1.46858	1.12915	2.06578	1.38253	1.14428	1.32288	2.06879	2.46125	1.72292	0.468149	3.93462	1.05212	1.25596	1.04385	1.84913	2.10654	2.79051	1.9448	NaN	2.31914	0.916695	2.28422	2.62233	0.449419	1.43363	1.10227	2.01661	1.11705	3.84097	1.02708	1.22607	1.019	1.80512	1.89851	2.53369	1.0015	2.49554	2.86492	1.56625	1.20424	1.22039	0.499284
2.13332	1.89585	NaN	NaN	NaN	1.86924	1.92227	0.669591	NaN	NaN	1.23312	1.55806	0.921816	0.977387	2.10974	NaN	0.833961	NaN	3.54853	0.942998	0.735789	0.665698	NaN	NaN	2.81304	1.64736	2.08255	NaN	NaN	1.82475	1.87652	0.653654	NaN	NaN	1.20377	0.899875	3.46407	0.920554	0.718276	0.649853	NaN	1.60815	NaN	NaN	1.99356	2.05012	NaN	NaN	0.983123	NaN
2.13332	1.40188	2.24871	NaN	NaN	NaN	2.07624	0.669591	NaN	1.11538	NaN	1.55806	0.921816	1.00739	2.22018	1.88148	1.58956	NaN	3.40331	0.978999	1.08173	0.925588	1.6485	1.53884	2.4872	2.51542	2.08255	2.19519	NaN	NaN	2.02682	0.653654	NaN	1.08883	NaN	0.899875	3.3223	0.955697	1.05598	0.903558	1.60926	2.45555	2.39826	NaN	NaN	2.21432	NaN	1.18956	0.983123	NaN
NaN	NaN	2.63435	1.05098	1.79983	NaN	3.14619	NaN	1.58129	1.2475	2.08935	1.88584	NaN	1.64672	2.09418	2.50073	NaN	NaN	NaN	1.21728	1.43741	NaN	2.39832	2.14591	3.30398	2.37015	NaN	2.57165	1.02596	NaN	3.07131	NaN	1.54365	1.21781	2.03962	NaN	NaN	1.18831	1.4032	NaN	2.34124	2.31373	2.80956	1.12087	NaN	3.35544	1.68646	1.33047	NaN	NaN
NaN	1.08231	2.19367	0.546178	0.789555	2.19082	2.38277	0.293354	0.870707	0.966936	1.4667	1.26547	0.983064	1.19855	1.54262	1.39566	1.47462	NaN	3.93462	0.90314	0.725357	0.63058	1.4434	1.24792	2.79051	1.44102	NaN	2.14146	0.533179	2.13867	2.32605	0.286371	0.849983	0.943921	1.43179	0.959666	3.84097	0.881644	0.708093	0.615571	1.40905	1.40672	2.33957	0.582503	2.33652	2.54124	0.928615	1.03124	1.04844	NaN
NaN	1.145	2.26844	NaN	0.456334	2.41779	2.38277	0.467762	0.983929	0.966936	1.4667	1.26547	0.983064	1.12593	1.76053	1.11469	1.3218	NaN	3.93462	0.902026	NaN	NaN	1.78435	1.56363	2.79051	1.55739	NaN	2.21445	NaN	2.36025	2.32605	0.456628	0.960511	0.943921	1.43179	0.959666	3.84097	0.880556	NaN	NaN	1.74188	1.52032	2.41931	NaN	2.57859	2.54124	1.04937	1.03124	1.04844	NaN
NaN	-1.32372	-2.22	-0.991132	-1.57024	-1.01564	-1.50799	-1.58395	-1.528	-1.35279	-1.53611	-1.61498	-1.46724	-0.252175	-1.34417	-1.58094	-0.805121	-1.19948	-0.997294	-1.15322	-1.76825	-0.581918	-1.38725	-1.98376	-1.61867	-1.51345	NaN	-2.35925	-1.0533	-1.07934	-1.60257	-1.6833	-1.62384	-1.43764	-1.63246	-1.55926	-1.05985	-1.22555	-1.87916	-0.618418	-1.47427	-1.60838	-2.26494	-1.0112	-1.0362	-1.53852	-1.55894	-1.38018	-1.49694	-1.22377
NaN	-0.593548	-1.20625	-0.268777	-0.544862	-0.363344	-0.461448	-0.301144	-0.598632	-0.531008	-0.694507	-0.206945	-0.598381	-0.147208	-0.954288	-1.19511	-0.37013	-0.376404	NaN	-0.413463	-0.542752	-0.630037	-0.306625	-0.716571	-1.00747	-0.614675	NaN	-1.28191	-0.285635	-0.386134	-0.490392	-0.320033	-0.63618	-0.564314	-0.738069	-0.635913	NaN	-0.439396	-0.576796	-0.669555	-0.325858	-0.653229	-1.23067	-0.274218	-0.3707	-0.47079	-0.610751	-0.541757	-0.610495	-0.384024
NaN	0.763528	0.318177	NaN	-0.0821756	-0.662152	1.948	1.93401	1.44027	2.31318	1.64858	1.03293	2.83366	0.944097	-1.7504	-2.78834	NaN	2.94743	NaN	3.32553	2.40426	2.59363	NaN	1.14967	4.44961	4.32574	NaN	0.310604	NaN	-0.703685	1.90164	1.88798	1.40599	2.25813	1.60934	2.76622	NaN	3.24638	2.34703	2.5319	NaN	4.22278	0.339339	NaN	-0.675557	2.07756	1.53606	2.46703	3.02212	3.14345
-3.17824	-2.72675	-3.68733	-3.46453	-3.70312	-1.79848	3.12716	-1.59087	-1.69347	-4.70251	-3.75375	-0.701895	-4.30993	-2.67409	-1.34012	-1.69304	-2.71799	-3.96766	NaN	-3.34586	-3.36079	-2.58735	-1.80359	-2.71881	1.65689	-3.1335	-3.37759	-3.91861	-3.68183	-1.91128	3.05273	-1.69065	-1.79969	-4.99747	-3.98919	-4.58026	NaN	-3.55573	-3.57159	-2.74964	-1.91671	-3.33004	-3.76198	-3.53466	-1.83489	3.33514	-1.72775	-4.79771	-4.39718	-4.04798
NaN	-0.649028	NaN	1.41979	1.12406	0.707643	NaN	NaN	0.861395	2.04917	1.24535	NaN	1.52714	NaN	NaN	-0.356912	3.3158	NaN	-0.237943	1.16472	2.32206	1.88322	3.31415	2.6804	-0.937531	2.22974	NaN	NaN	1.386	0.6908	NaN	NaN	0.840892	2.0004	1.21571	1.49079	-0.252868	1.137	2.2668	1.8384	3.23526	2.17667	NaN	1.51422	0.754706	NaN	0.918684	2.18545	1.62871	NaN
NaN	0.146352	0.6494	NaN	0.22328	NaN	1.57664	-0.4524	0.733549	NaN	1.08108	NaN	NaN	-0.331753	NaN	0.875241	NaN	-0.0480316	-0.282578	-0.119764	0.0606816	0.336724	1.24106	1.48621	NaN	0.976563	NaN	0.633943	NaN	NaN	1.53912	-0.480776	0.716089	NaN	1.05534	NaN	-0.300302	-0.127276	0.0592373	0.32871	1.21153	0.95332	0.69259	NaN	NaN	1.6815	0.782335	NaN	NaN	-0.049004
NaN	-1.27733	-2.30391	-1.71751	-1.29958	-1.77902	-1.95083	-1.13978	-1.58895	-1.55381	-1.8006	-0.457843	NaN	-1.056	-1.58143	-1.49223	NaN	-1.43412	-0.973688	-1.11771	-1.40023	-1.56637	-1.57482	NaN	-1.03837	-1.77341	NaN	-2.44842	-1.82524	-1.8906	-2.07319	-1.21127	-1.68862	-1.65127	-1.91354	NaN	-1.03476	-1.18781	-1.48806	-1.66462	-1.67359	-1.88464	-2.35055	-1.75228	-1.81503	-1.99032	-1.62112	-1.58527	NaN	-1.46315
NaN	-5.59488	-4.93848	-0.692228	-6.97536	-3.94345	-0.153658	-6.47459	0.407534	-5.95418	-4.55702	0.447853	-6.29732	-4.16141	-7.02135	-3.99154	0.280544	-5.89094	NaN	-4.75089	-5.65991	-5.53366	-2.92521	-4.16168	NaN	-6.11607	NaN	-5.24823	-0.735646	-4.19079	-0.163296	-6.8807	0.397834	-6.32764	-4.84285	-6.69231	NaN	-5.04889	-6.01492	-5.88075	-3.10868	-6.49969	-5.03845	-0.706241	-4.02328	-0.156769	0.434637	-6.07471	-6.42481	-6.0102
NaN	NaN	NaN	NaN	2.40117	0.804715	6.49709	3.11469	3.45125	2.33279	3.92935	3.95271	NaN	1.21953	2.97918	1.84947	NaN	NaN	2.16791	2.12506	NaN	2.49459	3.44201	2.87244	3.387	3.45963	NaN	NaN	NaN	0.785562	6.34245	3.04056	3.36911	2.27727	3.83583	NaN	2.11631	2.07448	NaN	2.43521	3.36009	3.37728	NaN	NaN	0.858234	6.92919	3.68078	2.48794	NaN	NaN
-0.0229209	-0.779296	-0.473337	-0.455691	-0.664991	-0.146806	-0.173916	-1.32075	-0.648496	-0.681449	-0.0451143	-1.23006	-1.01905	-0.699067	-0.526104	-0.407873	-0.391453	-0.823755	-0.126964	-0.921017	-0.619649	-0.879738	-0.470228	-0.643307	0.82028	-0.262273	-0.0243585	-0.503026	-0.484274	-0.156015	-0.184824	-1.40359	-0.689171	-0.724192	-0.047944	-1.08297	-0.134928	-0.978786	-0.658515	-0.934918	-0.499723	-0.278724	-0.48292	-0.464917	-0.149778	-0.177436	-0.661624	-0.695244	-1.03968	-0.840431
NaN	0.350391	1.2301	0.0130048	0.549936	0.870997	0.264588	-0.263672	0.268311	0.17218	0.453558	0.208066	0.23659	0.142244	0.575073	0.716061	-0.00900157	0.240274	NaN	0.173162	0.167572	NaN	0.170527	0.540831	0.0583596	0.651949	NaN	1.20082	0.0126952	0.850266	0.25829	-0.28021	0.261925	0.168082	0.442763	0.230959	NaN	0.16904	0.163584	NaN	0.166468	0.636432	1.31191	0.0138697	0.928924	0.282185	0.286156	0.183632	0.252325	0.256254
-0.698081	-0.0118993	0.173611	NaN	-0.273884	-0.545899	NaN	-0.357442	-0.328999	-0.053236	-0.54819	-1.00666	-0.482806	2.40667	-0.205953	-0.173477	NaN	NaN	NaN	-0.436923	NaN	-0.785918	-0.20392	-0.536787	NaN	NaN	-0.741867	0.169478	NaN	-0.58014	NaN	-0.379862	-0.349635	-0.0565751	-0.582574	-0.513089	NaN	-0.464328	NaN	-0.835213	-0.216711	NaN	0.185157	NaN	-0.556951	NaN	-0.335659	-0.0543137	-0.49258	NaN
2.32439	0.0997158	0.911117	NaN	NaN	2.46578	2.04195	0.72169	NaN	1.31327	0.783063	3.60041	0.938917	NaN	1.62287	1.6414	2.12433	NaN	NaN	2.11138	NaN	2.91037	3.01103	NaN	NaN	NaN	2.26907	0.889431	NaN	2.40709	1.99335	0.704513	NaN	1.28201	0.764425	0.916569	NaN	2.06113	NaN	2.8411	2.93936	NaN	0.971713	NaN	2.62977	2.17775	NaN	1.40061	1.00136	NaN
NaN	NaN	NaN	3.13083	2.91972	NaN	4.52202	3.83338	4.26538	3.39818	3.68581	4.90948	3.99552	3.25825	3.32645	NaN	NaN	3.60447	NaN	3.02873	3.37522	3.90378	3.74805	3.11904	4.94451	3.4226	NaN	NaN	3.05631	NaN	4.41439	3.74214	4.16386	3.3173	3.59808	3.90042	NaN	2.95665	3.29488	3.81087	3.65885	3.34113	NaN	3.33905	NaN	4.82277	4.54906	3.62418	4.26125	3.84419
NaN	2.04758	1.62586	1.83824	2.59307	0.922786	4.25604	2.66643	3.65262	2.656	2.94924	3.39011	3.10833	2.00794	1.61236	0.911442	2.24758	2.47073	NaN	2.20724	2.37686	2.50328	1.86038	3.06511	3.67132	1.96823	NaN	1.58716	1.79448	0.900822	4.15474	2.60296	3.56568	2.59278	2.87905	3.03435	NaN	2.1547	2.32029	2.4437	1.8161	1.92139	1.73399	1.96049	0.984158	4.53909	3.89554	2.83264	3.31506	2.63505
NaN	0.431515	NaN	2.37859	2.91561	NaN	NaN	2.86883	2.62979	2.28899	2.91065	3.66809	2.82085	3.11254	2.19037	1.18297	NaN	2.63331	4.0356	2.97722	2.60419	NaN	2.79547	2.72046	4.49597	1.69285	NaN	NaN	2.32198	NaN	NaN	2.80055	2.56719	2.23451	2.84137	2.75371	3.93955	2.90636	2.54221	NaN	2.72893	1.65256	NaN	2.53679	NaN	NaN	2.80469	2.44122	3.00846	2.80845
NaN	1.92195	NaN	3.16736	-0.0321939	1.04654	NaN	NaN	2.54985	2.80734	1.52113	1.96025	NaN	3.18583	1.79646	0.635868	NaN	NaN	NaN	2.66804	1.99558	NaN	3.93946	3.01531	NaN	NaN	NaN	NaN	3.09198	1.02163	NaN	NaN	2.48916	2.74052	1.48493	NaN	NaN	2.60454	1.94809	NaN	3.8457	NaN	NaN	3.37801	1.11614	NaN	2.71943	2.99405	NaN	NaN
1.24343	-0.164909	-1.11012	-2.2949	-0.127141	-2.23417	-1.45539	0.313053	-3.46867	-0.0610216	-0.316859	-0.50849	0.238671	-1.92519	-0.849853	-1.22586	-3.52212	0.298815	-1.19694	0.677001	0.397518	-0.301055	-2.60029	-2.64069	-0.114618	-1.09385	1.21384	-1.17975	-2.43885	-2.3743	-1.54668	0.305602	-3.68624	-0.064849	-0.336734	0.23299	-1.27202	0.660888	0.388056	-0.319938	-2.76339	-1.16245	-1.13259	-2.34136	-2.2794	-1.48486	-3.53889	-0.0622569	0.254544	0.318688
NaN	-1.41601	NaN	NaN	-1.04319	-0.666577	NaN	-2.41198	-0.654989	NaN	-1.21608	-0.756365	-1.87355	-1.24258	-1.53698	-0.499884	NaN	-1.91844	NaN	-1.5257	-2.2671	NaN	-1.20183	-0.782372	-1.09967	-1.5571	NaN	NaN	NaN	-0.708387	NaN	-2.56327	-0.696072	NaN	-1.29236	-1.99106	NaN	-1.6214	-2.4093	NaN	-1.27721	-1.65477	NaN	NaN	-0.680071	NaN	-0.668249	NaN	-1.91147	-1.95728
NaN	1.1913	2.27993	0.401852	0.989553	NaN	1.77845	1.27841	1.64695	-0.133623	2.1387	1.39203	1.62847	2.54484	1.90002	NaN	NaN	1.44931	NaN	1.06342	0.696035	1.41281	0.707151	NaN	1.05907	NaN	NaN	2.22566	0.392287	NaN	1.73612	1.24799	1.60776	-0.142005	2.08779	1.58971	NaN	1.03811	0.679469	1.37918	0.69032	NaN	2.43156	0.428578	NaN	1.89673	1.75649	-0.136328	1.73677	1.5457
0.653804	1.30027	0.144779	1.57051	2.66452	-0.749642	1.06712	1.50954	0.70703	1.24686	0.357851	1.03771	1.66781	1.81114	1.01216	-0.0512402	1.62635	1.75286	2.03928	1.89348	1.70724	1.56685	1.16048	0.795081	0.848286	1.46583	0.638243	0.141333	1.53313	-0.796662	1.04172	1.47361	0.690201	1.21719	0.349334	1.62811	1.99074	1.84842	1.66661	1.52956	1.13286	1.43094	0.154408	1.67496	-0.764818	1.13809	0.754052	1.32979	1.77873	1.86944
NaN	-0.24839	-0.695948	0.312095	NaN	-0.266139	NaN	0.121605	-0.354874	NaN	-0.411669	-0.149571	NaN	-0.164469	-0.871475	-0.732172	NaN	NaN	NaN	-0.030161	NaN	0.100771	-0.202074	-0.0393848	NaN	NaN	NaN	-0.7396	0.304666	-0.282832	NaN	0.11871	-0.377133	NaN	-0.437491	NaN	NaN	-0.0320528	NaN	0.0983723	-0.214749	NaN	-0.710037	0.332851	-0.271526	NaN	-0.362058	NaN	NaN	NaN
NaN	1.73572	1.55698	0.337472	2.23106	1.29781	0.862328	1.53147	1.26924	0.921866	1.92379	1.97413	1.78362	1.58281	1.23598	0.602017	NaN	1.4739	1.54242	1.38116	1.45942	NaN	0.0501691	1.09906	2.65931	1.55553	NaN	1.51992	0.32944	1.26692	0.841804	1.49502	1.23903	0.899924	1.878	1.74116	1.50571	1.34829	1.42469	NaN	0.048975	1.5185	1.66053	0.359916	1.38412	0.919679	1.35365	0.983176	1.90224	1.57192
NaN	NaN	NaN	1.86835	1.52581	NaN	NaN	1.79265	3.1615	1.23247	0.913915	1.76778	2.5202	2.56225	0.329988	NaN	NaN	1.96234	NaN	NaN	2.60441	NaN	3.10416	3.27359	4.35712	1.56789	NaN	NaN	1.82388	NaN	NaN	1.74999	3.08625	1.20313	0.892163	2.46022	NaN	NaN	2.54243	NaN	3.03028	1.53057	NaN	1.9926	NaN	NaN	3.37176	1.31443	2.68781	2.09285
NaN	0.710623	1.20797	0.628761	1.27468	-0.267335	NaN	0.591841	1.3974	0.462456	0.273295	1.37895	0.908283	0.870169	0.564462	NaN	NaN	0.694863	3.61861	0.689966	1.00898	NaN	1.11856	NaN	3.23653	0.39148	NaN	1.17922	0.613796	-0.284103	NaN	0.577754	1.36414	0.451449	0.26679	0.886665	3.53248	0.673543	0.984964	NaN	1.09194	0.382162	1.28831	0.670578	-0.272747	NaN	1.49033	0.493213	0.96869	0.741076
NaN	-3.96949	-0.79794	-1.39768	-4.00186	-1.6671	-1.80418	-1.50272	-0.883977	0.058368	-0.963308	-2.01536	-2.98405	-1.98906	-2.4112	NaN	-1.89923	-2.05796	-1.2565	-1.76067	-0.810288	-1.19952	2.08417	-2.23323	NaN	-2.13913	NaN	-0.847989	-1.48535	-1.77166	-1.91735	-1.59698	-0.939423	0.0569787	-1.02373	-3.17122	-1.33531	-1.8711	-0.861111	-1.27476	2.03457	-2.2733	-0.814094	-1.42597	-1.70084	-1.84071	-0.901872	0.0622498	-3.04446	-2.09963
NaN	0.702789	NaN	NaN	NaN	-1.08041	NaN	0.831996	0.479372	NaN	-1.11279	-0.100403	0.177978	NaN	0.67333	0.236162	NaN	0.554435	NaN	-0.662202	-0.213576	NaN	NaN	NaN	NaN	1.29158	NaN	NaN	NaN	-1.14817	NaN	0.812194	0.467962	NaN	-1.18259	0.173742	NaN	-0.703738	-0.226973	NaN	NaN	1.26084	NaN	NaN	-1.10228	NaN	0.511253	NaN	0.189815	0.591309
NaN	NaN	NaN	NaN	-0.400786	0.118742	-0.018494	NaN	-0.265664	-0.498924	-0.460195	NaN	-0.760529	-1.14126	-0.898787	-0.38574	0.0103883	NaN	1.2827	-0.814493	NaN	NaN	-0.385944	NaN	-1.02075	-0.132257	NaN	NaN	NaN	0.115916	-0.019654	NaN	-0.282327	-0.530218	-0.48906	-0.808232	1.25217	-0.865581	NaN	NaN	-0.410152	-0.140553	NaN	NaN	0.12664	-0.0188684	-0.271042	-0.509024	-0.775925	NaN
0.719958	-0.685278	0.37277	-0.639116	-0.211475	0.833695	0.334812	-1.17382	-0.43527	-0.245979	0.472242	-0.904858	-0.440724	-0.638396	-0.704059	-0.383155	-0.234186	-0.50891	-0.347229	-0.564501	-0.0992676	-0.584062	-0.238289	-0.136936	-0.217869	0.00696342	0.702822	0.363897	-0.679203	0.813852	0.326843	-1.24744	-0.462571	-0.261407	0.461002	-0.468368	-0.369008	-0.599908	-0.105494	-0.620696	-0.253235	0.00679768	0.397561	-0.652054	0.889142	0.357079	-0.444082	-0.250959	-0.449647	-0.519212
0.216973	-0.609253	-0.480725	NaN	-0.415506	-0.346354	-0.720003	-0.652006	-0.858155	-1.06358	-0.47677	-0.328977	-0.804788	NaN	-0.17862	-0.96569	-0.931167	-0.906088	-0.377192	-0.865752	-0.527347	-1.27318	-0.726173	-0.285792	-0.572428	-0.984102	0.211809	-0.510878	NaN	-0.368078	-0.765164	-0.692902	-0.911981	-1.13029	-0.506675	-0.855267	-0.400851	-0.920054	-0.560424	-1.35304	-0.771721	-1.04583	-0.490457	NaN	-0.353366	-0.734579	-0.875528	-1.08511	-0.82108	-0.924431
-0.390303	-0.693352	-0.0187919	-1.20596	-0.393239	-0.100888	-0.360549	-0.954201	-1.15383	-0.835113	-0.281565	-0.660453	-0.994951	-0.960842	-0.405758	-0.788719	-0.793477	-0.83428	NaN	-0.938205	-0.792769	NaN	-0.882396	-0.255727	NaN	-0.817133	-0.414784	-0.0199706	-1.2816	-0.107216	-0.383164	-1.01405	-1.22621	-0.887494	-0.299225	-1.05736	NaN	-0.997053	-0.842494	NaN	-0.937742	-0.868387	-0.0191724	-1.23037	-0.10293	-0.367848	-1.17719	-0.852019	-1.01509	-0.85117
0.345055	-0.156786	-0.337212	NaN	NaN	0.0738266	0.146162	NaN	NaN	-0.527197	NaN	-0.155411	-1.07097	NaN	-0.459549	-0.988668	-0.910557	NaN	NaN	NaN	-0.389996	NaN	0.0985483	-0.749107	-0.890327	-0.457717	0.336842	-0.358363	NaN	0.0720694	0.142683	NaN	NaN	-0.560265	NaN	-1.13814	NaN	NaN	-0.414458	NaN	0.0962027	-0.486426	-0.344039	NaN	0.0787366	0.155883	NaN	-0.53787	-1.09265	NaN
NaN	-0.21345	-0.575018	NaN	NaN	-1.51197	NaN	-0.697031	-0.737729	NaN	-1.62713	-0.970861	-0.930352	-1.29869	-0.161478	NaN	NaN	-0.789313	NaN	-0.803969	NaN	NaN	NaN	NaN	-0.765606	-0.708518	NaN	-0.611085	NaN	-1.6068	NaN	-0.740751	-0.784001	NaN	-1.72919	-0.988707	NaN	-0.854397	NaN	NaN	NaN	-0.752959	-0.586659	NaN	-1.54258	NaN	-0.752663	NaN	-0.949187	-0.805292
NaN	0.0792291	1.00825	-0.592759	0.417967	0.693297	0.532492	-0.33637	0.20755	0.638276	0.189962	-0.631977	-0.385187	-0.80969	-0.48552	1.08409	-0.309141	-0.186236	-0.592157	-0.513876	-0.2294	-0.323774	-0.205395	0.428666	-0.595264	0.000181976	NaN	0.984251	-0.629939	0.676796	0.519818	-0.357468	0.20261	0.623084	0.18544	-0.409348	-0.629299	-0.546107	-0.243789	-0.344082	-0.218278	0.000177645	1.0753	-0.604759	0.739406	0.567907	0.221354	0.680726	-0.392985	-0.190006
NaN	0.306426	NaN	-0.840567	0.377581	-0.103131	NaN	NaN	1.08393	0.415676	-0.66531	0.251552	NaN	-0.922503	0.210322	0.533963	NaN	NaN	NaN	-0.157038	NaN	NaN	-0.0425168	0.748115	0.61231	0.679914	NaN	NaN	-0.89329	-0.1096	NaN	NaN	1.05813	0.405782	-0.70704	NaN	NaN	-0.166888	NaN	NaN	-0.0451836	0.663732	NaN	-0.857584	-0.105219	NaN	1.15602	0.443321	NaN	NaN
-1.08134	0.649316	-1.90591	-0.75834	-0.367596	-2.00657	-0.967518	0.195945	-1.19112	-0.215136	-0.920547	-0.232544	0.268897	0.400538	-0.589156	-1.1976	-0.574016	-0.196396	NaN	-0.267585	-0.260373	NaN	-1.28567	-1.7289	-0.944028	-0.0150231	-1.14916	-2.02546	-0.805905	-2.13243	-1.0282	0.191281	-1.26583	-0.228631	-0.978287	0.262497	NaN	-0.284369	-0.276704	NaN	-1.36631	-0.0159653	-1.9445	-0.773692	-2.0472	-0.987104	-1.21523	-0.219492	0.286781	-0.200372
NaN	0.686039	1.78245	0.965034	1.15744	1.7377	1.7626	0.612839	1.13485	0.678167	1.08133	0.838793	0.946633	0.698435	0.702696	0.783744	1.07764	0.636787	NaN	0.798505	0.889018	1.0316	1.09388	1.72424	NaN	1.48298	NaN	1.74002	0.942064	1.69634	1.72065	0.598253	1.10784	0.662026	1.0556	0.924102	NaN	0.7795	0.867858	1.00705	1.06784	1.44769	1.90099	1.02922	1.85327	1.87982	1.21032	0.72327	1.00959	0.679137
NaN	-3.40326	-2.4008	-1.69791	-3.8543	-2.15905	NaN	-2.75525	-2.4458	-2.36035	-2.82802	-3.2961	-3.56287	-2.85486	-2.44676	-2.40363	NaN	NaN	-2.64756	-2.25173	-1.87044	-2.35162	-2.22437	-3.0218	-3.03872	-2.49372	NaN	-2.55139	-1.80441	-2.29448	NaN	-2.92807	-2.59921	-2.5084	-3.0054	-3.78634	-2.81362	-2.39297	-1.98776	-2.49912	-2.36389	-2.65013	-2.44941	-1.73228	-2.20276	NaN	-2.49531	-2.40813	-3.63499	NaN
NaN	0.684575	NaN	-0.0172706	NaN	-0.599143	-0.466203	0.731053	-0.651949	-0.363757	-0.577523	-0.362054	0.0366377	1.53912	1.48674	-0.0139937	1.30524	0.278205	-0.464198	-0.894817	0.392405	0.389982	-0.0801344	NaN	1.62351	-0.575745	NaN	NaN	-0.0183539	-0.636723	-0.495444	0.713653	-0.692841	-0.386573	-0.613747	0.0357657	-0.493314	-0.950943	0.383065	0.3807	-0.0851607	-0.611858	NaN	-0.0176203	-0.611272	-0.475641	-0.665147	-0.371121	0.0390744	0.296708
NaN	0.0319824	-0.130287	-0.135434	-0.112517	0.170861	-0.0268609	0.0291749	0.369252	0.0319278	-0.347505	0.259126	-0.0454424	0.813935	0.0783455	0.373754	0.807254	0.299804	NaN	-0.0407156	-0.327706	0.238633	0.376161	0.607562	NaN	NaN	NaN	-0.138459	-0.143928	0.166794	-0.0285457	0.0284805	0.360463	0.0311679	-0.369302	-0.0482927	NaN	-0.0432694	-0.348261	0.232953	0.367208	NaN	-0.132924	-0.138175	0.182224	-0.0274047	0.393809	0.0340512	-0.0463623	0.319744
NaN	2.52139	3.26607	1.98974	2.75528	1.5462	3.22641	2.58292	NaN	2.01608	2.86765	2.03133	2.52807	2.40463	2.93922	2.0772	NaN	NaN	2.5004	1.74658	2.37868	NaN	0.206943	NaN	NaN	2.81076	NaN	3.18833	1.94238	1.5094	3.14961	2.52145	NaN	1.9681	2.7994	2.4679	2.44089	1.70501	2.32207	NaN	0.202017	2.74386	3.48328	2.12207	1.64903	3.44098	NaN	2.15017	2.69621	NaN
4.49596	2.26809	2.61671	1.46148	2.99683	0.986835	2.7751	2.07898	1.76705	2.79927	3.33465	2.39932	3.54114	3.30144	2.84004	2.43915	1.32126	3.04985	NaN	3.10545	2.61475	2.65684	1.7367	2.06291	NaN	3.32256	4.38895	2.55442	1.4267	0.963347	2.70904	2.02949	1.72499	2.73264	3.25528	3.45685	NaN	3.03154	2.55252	2.59361	1.69536	3.24348	2.79074	1.55868	1.05247	2.95966	1.88457	2.98544	3.77665	3.25269
NaN	1.63033	NaN	NaN	2.52336	NaN	NaN	1.32098	1.25422	1.18779	0.00707442	0.731464	1.64238	1.43595	1.34283	1.14041	NaN	1.07968	NaN	1.54725	0.801791	NaN	1.33576	0.690316	NaN	1.94767	NaN	NaN	NaN	NaN	NaN	1.28954	1.22437	1.15952	0.00690604	1.60328	NaN	1.51043	0.782707	NaN	1.30396	1.90131	NaN	NaN	NaN	NaN	1.33764	1.26679	1.7516	1.15148
NaN	1.61865	-0.187194	-0.291187	0.195729	NaN	NaN	-0.104509	0.256508	NaN	-0.077293	-0.560741	0.286586	0.0257891	-0.545288	-0.0218186	NaN	NaN	NaN	-0.121287	NaN	0.42603	0.410486	0.218892	NaN	-0.0912031	NaN	-0.198936	-0.309451	NaN	NaN	-0.111064	0.250402	NaN	-0.0821411	0.279765	NaN	-0.128895	NaN	0.415889	0.400716	-0.0969237	-0.190984	-0.297082	NaN	NaN	0.273567	NaN	0.305646	NaN
-0.989385	0.327849	0.754955	-0.686015	-0.157272	0.224145	-0.200026	-0.364178	0.100832	-0.1981	0.665412	-0.828771	-0.27277	-0.912308	0.597784	0.628696	-0.584895	-0.520152	0.149685	-0.569027	0.195283	-0.962933	-0.0535261	0.0870969	0.95206	0.168597	-1.05144	0.736986	-0.729044	0.21881	-0.212573	-0.38702	0.0984319	-0.210525	0.649575	-0.289879	0.146123	-0.604719	0.190635	-1.02333	-0.0568834	0.164584	0.805164	-0.699903	0.239052	-0.204076	0.107538	-0.20211	-0.278292	-0.530682
0.543655	0.131648	1.1179	0.440692	0.333831	0.897009	0.409177	0.302188	0.401839	0.231061	0.462354	-0.226142	0.268182	0.0794053	0.432254	0.691393	0.534679	-0.0370452	0.801732	0.14632	0.309496	0.219819	0.623355	0.44871	0.923685	0.263641	0.530716	1.09129	0.430203	0.875659	0.399438	0.294995	0.392275	0.225561	0.451349	0.261799	0.78265	0.142837	0.30213	0.214587	0.608519	0.257366	1.19225	0.470001	0.956667	0.43639	0.428564	0.246428	0.286018	-0.0377952
0.552871	-0.0577121	0.96222	0.170172	0.41483	1.01922	0.112466	-0.123304	0.0267473	-0.260884	0.793023	-0.233502	-0.186204	-0.174871	0.0418986	0.145191	0.574449	-0.0394403	-0.190286	-0.0944984	0.113175	-0.198806	0.126039	0.512552	0.0477712	0.343395	0.539712	0.939318	0.166122	0.994961	0.109789	-0.131038	0.0261106	-0.277248	0.774148	-0.197884	-0.202222	-0.100426	0.110482	-0.211276	0.123039	0.335222	1.02621	0.181489	1.087	0.119946	0.0285261	-0.266166	-0.189974	-0.0402388
NaN	0.304769	-1.03671	NaN	0.906662	NaN	NaN	0.920613	-0.721573	1.34891	0.535334	1.61451	1.67664	1.60758	0.19335	NaN	NaN	1.65288	-0.0853694	1.7965	NaN	NaN	0.685863	0.278105	-0.408911	1.37781	NaN	-1.10174	NaN	NaN	NaN	0.898701	-0.766833	1.31681	0.522592	1.63674	-0.090724	1.75374	NaN	NaN	0.669538	1.34502	-1.0577	NaN	NaN	NaN	-0.736181	1.43862	1.78815	1.76281
NaN	NaN	-1.78039	-2.80989	-1.85251	-1.54973	-2.2348	-3.40998	NaN	NaN	-1.48065	0.739975	NaN	-0.533769	-1.10827	-0.436923	-0.623642	-1.98683	-1.15398	-2.72964	NaN	NaN	-1.48272	-1.92501	-1.0962	-1.55917	NaN	-1.89207	-2.98614	-1.64694	-2.37497	-3.62387	NaN	NaN	-1.57352	NaN	-1.22636	-2.90085	NaN	NaN	-1.57572	-1.65697	-1.81644	-2.86678	-1.58111	-2.28004	NaN	NaN	NaN	-2.02705
NaN	-0.424171	NaN	NaN	-2.89989	-2.04463	NaN	-2.0207	-0.596631	-2.7746	-1.94242	0.838166	NaN	0.108705	-0.853309	NaN	-0.497786	-2.31198	NaN	-1.91524	NaN	NaN	-1.09989	-1.39048	NaN	NaN	NaN	NaN	NaN	-2.17288	NaN	-2.14744	-0.634054	-2.94863	-2.06425	NaN	NaN	-2.03537	NaN	NaN	-1.16887	NaN	NaN	NaN	-2.08602	NaN	-0.608709	-2.83077	NaN	-2.35878
NaN	-0.404117	-0.714122	NaN	-1.79771	-1.87383	0.158331	-0.453097	-0.147099	-1.38228	-2.08452	0.780588	-1.58314	-0.367307	-0.401366	NaN	-0.596481	-2.20011	-0.234399	-1.8511	-0.715746	NaN	-1.48599	NaN	0.071436	-0.596576	NaN	-0.758914	NaN	-1.99136	0.154563	-0.481517	-0.156325	-1.46898	-2.21526	-1.68244	-0.249101	-1.9672	-0.76064	NaN	-1.57919	-0.633995	-0.728579	NaN	-1.91176	0.168861	-0.150077	-1.41027	-1.61519	-2.24465
NaN	-0.640494	-0.850118	-2.11855	-1.9097	-1.54694	NaN	NaN	-0.66769	-2.28915	-1.53025	0.317516	-2.42973	-0.217829	-0.530447	-0.491528	NaN	NaN	NaN	-0.14801	-2.40745	NaN	-1.04197	NaN	NaN	NaN	NaN	-0.90344	-2.25144	-1.64397	NaN	NaN	-0.70957	-2.43274	-1.62624	-2.58213	NaN	-0.157293	-2.55845	NaN	-1.10732	NaN	-0.867328	-2.16144	-1.57826	NaN	-0.681207	-2.3355	-2.47892	NaN
NaN	0.204218	0.966498	NaN	-0.410886	-0.803797	-0.324657	-2.26608	1.51862	-2.18794	NaN	0.0890066	-1.76362	-0.490541	0.135083	1.37166	-0.451619	-1.35809	NaN	-1.15027	NaN	NaN	0.449197	-0.12829	0.186097	NaN	NaN	0.943494	NaN	-0.854213	-0.345021	-2.40822	1.48248	-2.32518	NaN	-1.87424	NaN	-1.22242	NaN	NaN	0.438506	NaN	1.03078	NaN	-0.820069	-0.33123	1.61962	-2.23224	-1.79932	-1.38558
NaN	2.62028	NaN	2.65497	NaN	NaN	NaN	3.12524	0.511257	2.03671	2.70508	2.66152	2.76037	1.93917	2.96261	-0.386679	NaN	NaN	NaN	2.06015	3.03092	2.58678	NaN	2.74554	NaN	NaN	NaN	NaN	2.59178	NaN	NaN	3.05086	0.499088	1.98823	2.6407	2.69466	NaN	2.01112	2.95878	2.52521	NaN	NaN	NaN	2.83154	NaN	NaN	0.545259	2.17217	2.94395	NaN
NaN	-3.26739	-3.4841	-4.19753	-4.41189	NaN	NaN	NaN	-1.69791	-3.24638	-2.9386	NaN	-3.7442	-2.93105	NaN	-2.06812	NaN	-3.4157	-3.77641	-3.43895	NaN	NaN	-2.51185	-2.51523	-3.82554	NaN	NaN	-3.70264	-4.46081	NaN	NaN	NaN	-1.80441	-3.45	-3.12292	-3.97905	-4.01327	-3.65466	NaN	NaN	-2.6694	NaN	-3.55463	-4.2825	NaN	NaN	-1.73229	-3.3121	-3.82	-3.48484
NaN	-3.2432	-2.51431	-1.6706	NaN	-2.37005	NaN	NaN	NaN	-3.08366	-1.89766	NaN	-3.57876	-4.04776	-3.37337	-2.45336	NaN	NaN	NaN	-4.05034	-2.72663	-3.39541	-2.67163	-2.45418	-2.81932	NaN	NaN	-2.67201	-1.77538	-2.51871	NaN	NaN	NaN	-3.27708	-2.01669	-3.80323	NaN	-4.30439	-2.89765	-3.60838	-2.83921	NaN	-2.56521	-1.70442	-2.41803	NaN	NaN	-3.14609	-3.65121	NaN
NaN	-2.94264	-3.06002	NaN	-4.0202	-1.71158	-2.97774	-2.77127	-1.59511	-3.76712	-2.61976	-2.67799	0.820472	-2.99238	-3.47562	-2.16978	-2.63481	-3.35944	NaN	-3.77626	-3.36229	NaN	-2.10923	-2.80742	-1.83931	-3.1596	NaN	-3.25195	NaN	-1.81894	-3.16451	-2.9451	-1.69516	-4.0034	-2.78408	0.800944	NaN	-4.01312	-3.57318	NaN	-2.24152	-3.35778	-3.12196	NaN	-1.74623	-3.03802	-1.6274	-3.84338	0.87504	-3.42745
0.949898	0.60646	0.134685	-0.0765083	0.720259	0.950257	0.529073	0.194325	0.309427	-0.371147	1.18781	0.0909073	0.163283	0.00804428	NaN	0.752202	0.242772	-0.0423094	0.0307517	-0.272538	0.417379	NaN	0.435203	0.516117	0.421764	0.039025	0.927289	0.131479	-0.0813071	0.927639	0.51648	0.1897	0.302062	-0.394426	1.15954	0.159397	0.0300198	-0.289632	0.407445	NaN	0.424844	0.0380962	0.143642	-0.0780571	1.01346	0.56426	0.330006	-0.378661	0.174143	-0.043166
NaN	0.183122	NaN	-1.17473	-1.48526	-0.736995	-1.91558	NaN	0.0526604	-0.756021	-1.03163	-1.18715	0.0121269	-0.517103	-0.294159	-0.983782	-0.753993	NaN	NaN	-0.655111	NaN	NaN	NaN	-0.794526	NaN	NaN	NaN	NaN	-1.24841	-0.783222	-2.03573	NaN	0.051407	-0.803441	-1.09634	0.0118382	NaN	-0.696202	NaN	NaN	NaN	NaN	NaN	-1.19851	-0.751915	-1.95436	0.0561626	-0.771326	0.0129334	NaN
NaN	0.147382	NaN	NaN	-1.97064	NaN	NaN	1.53695	-1.35216	1.03773	1.64863	2.25074	0.983671	0.0403964	-0.0492568	NaN	NaN	1.0538	-1.42485	0.100012	1.23235	NaN	NaN	-1.14013	-0.0514854	-0.462464	NaN	NaN	NaN	NaN	NaN	1.50036	-1.43697	1.01303	1.60939	0.960258	-1.51422	0.0976317	1.20301	NaN	NaN	-0.491471	NaN	NaN	NaN	NaN	-1.37953	1.10675	1.04909	1.12389
-0.813829	-0.687041	NaN	-1.31693	0.122412	-0.814612	-1.51302	0.105045	-1.09066	NaN	NaN	0.453032	0.397499	-0.362565	-1.10053	-1.5601	-0.894303	1.02967	-2.07543	0.0573682	0.400664	0.257328	-1.28736	NaN	-2.14777	-0.235734	-0.864875	NaN	-1.39953	-0.865707	-1.60792	0.102545	-1.15907	NaN	NaN	0.388038	-2.20561	0.0560028	0.391128	0.251203	-1.36811	-0.25052	NaN	-1.34359	-0.831104	-1.54365	-1.11274	NaN	0.423935	1.09815
NaN	-0.214447	NaN	-1.13596	-1.04928	-1.03395	NaN	-0.153242	-1.57285	0.0311518	-1.09633	NaN	-0.304951	-0.93093	NaN	-0.855279	NaN	0.0130192	NaN	-0.193111	-0.650724	-0.24347	-0.588126	-1.15413	NaN	NaN	NaN	NaN	-1.20721	-1.0988	NaN	-0.162854	-1.67151	0.0304103	-1.16509	-0.324078	NaN	-0.205224	-0.69154	-0.258741	-0.625015	NaN	NaN	-1.15895	-1.05488	NaN	-1.60469	0.0332236	-0.311124	0.0138851
NaN	0.631409	NaN	0.507249	NaN	0.758199	0.876281	0.433229	1.13265	0.59005	1.39565	0.365581	1.01304	0.400012	0.444447	0.514119	NaN	NaN	NaN	0.61137	0.8992	NaN	1.07522	1.16672	0.66223	NaN	NaN	NaN	0.495176	0.740152	0.855424	0.422917	1.10569	0.576006	1.36244	0.988926	NaN	0.596819	0.877798	NaN	1.04963	NaN	NaN	0.540985	0.808624	0.934559	1.20798	0.629293	1.08041	NaN
-0.860007	NaN	NaN	-1.2968	NaN	-0.299023	-0.892699	-1.08715	NaN	NaN	-1.10522	-0.92417	-1.04549	-1.38362	-1.23906	-1.11627	-1.67924	-1.16617	-1.73611	-1.11239	-1.24439	-1.60233	-1.27561	-0.954942	-1.30224	-1.02113	-0.91395	NaN	-1.37814	-0.317778	-0.948692	-1.15534	NaN	NaN	-1.17454	-1.11107	-1.845	-1.18216	-1.32244	-1.70284	-1.35562	-1.08517	NaN	-1.32306	-0.305076	-0.910771	NaN	NaN	-1.06666	-1.18978
NaN	-1.83978	-1.41242	-1.0812	-0.953812	-0.980055	-1.4651	-1.65895	-1.5035	-0.921491	-1.15252	-0.579167	-1.38556	-1.57501	-1.16075	-1.9696	-1.50591	-1.47776	NaN	-1.0472	-1.13199	NaN	-1.36531	-0.623373	-1.3366	-1.07214	NaN	-1.50101	-1.14902	-1.04153	-1.557	-1.76301	-1.5978	-0.979289	-1.22481	-1.47247	NaN	-1.11288	-1.203	NaN	-1.45095	-1.13938	-1.44101	-1.10309	-0.999895	-1.49476	-1.53393	-0.940145	-1.41361	-1.50767
NaN	-0.640494	-0.611926	0.365943	-1.59329	-1.38129	NaN	-0.28719	-0.956823	-0.913534	-2.97485	-1.64478	-1.44614	-1.4555	-0.0192422	-1.24635	NaN	-1.07401	-1.65671	-0.258075	-0.531163	-0.465022	-0.287773	-2.4867	NaN	-1.00001	NaN	-0.650308	0.357233	-1.46793	NaN	-0.305204	-1.01684	-0.970834	-3.16144	-1.53685	-1.76063	-0.274262	-0.56448	-0.49419	-0.305823	-1.06273	-0.624314	0.390281	-1.40925	NaN	-0.976193	-0.932028	-1.47542	-1.09575
NaN	-1.73349	-1.6149	NaN	-0.754784	-0.740052	-1.25239	NaN	-2.04033	NaN	NaN	-1.3794	-1.66291	-2.5812	-1.72397	-1.97461	NaN	-1.88976	NaN	-1.32831	-1.40545	-1.36984	-1.47439	-0.689407	-1.31087	-1.59803	NaN	-1.71619	NaN	-0.78647	-1.33094	NaN	-2.16831	NaN	NaN	-1.76721	NaN	-1.41163	-1.49361	-1.45576	-1.56687	-1.69827	-1.64759	NaN	-0.755034	-1.27774	-2.08163	NaN	-1.69657	-1.92801
NaN	-1.40607	-2.20978	-0.565147	-1.99672	-0.459347	-1.23845	-1.06457	-0.695719	-0.936716	-0.00465958	-0.627975	-0.985841	-0.638086	-1.66642	-1.4283	-0.755936	-0.734737	-1.82506	-0.776965	-1.84365	-0.264565	-0.524737	-1.1602	-1.61381	-1.55646	NaN	-2.34839	-0.600595	-0.488159	-1.31612	-1.13134	-0.739356	-0.99547	-0.00495184	-1.04768	-1.93953	-0.825698	-1.95929	-0.28116	-0.55765	-1.65409	-2.25452	-0.576588	-0.468646	-1.26352	-0.709803	-0.955679	-1.0058	-0.749611
NaN	NaN	NaN	-0.869574	-2.41712	-0.321508	-0.164734	-2.76175	NaN	-0.375064	-1.05718	-1.81827	NaN	-2.38114	-2.8067	-1.12694	-0.14297	NaN	NaN	-1.60044	-2.1881	-1.58249	NaN	-2.25814	NaN	NaN	NaN	NaN	-0.924117	-0.341674	-0.175067	-2.93498	NaN	-0.398589	-1.12349	NaN	NaN	-1.70083	-2.32534	-1.68175	NaN	NaN	NaN	-0.887178	-0.328017	-0.168069	NaN	-0.382657	NaN	NaN
NaN	-0.981005	-1.51057	-4.46659	-3.06746	NaN	-2.55147	-1.00327	-2.82385	-1.26051	-0.60138	-2.35162	-2.38011	-0.105262	-1.07824	-2.24717	NaN	-1.4126	-3.16083	-1.89112	-0.889413	NaN	-3.1477	-2.50196	-2.49481	-2.51903	NaN	-1.60532	-4.74675	NaN	-2.7115	-1.06619	-3.00097	-1.33958	-0.639101	-2.52939	-3.35908	-2.00973	-0.945199	NaN	-3.34513	-2.67703	-1.54115	-4.55701	NaN	-2.60312	-2.88102	-1.28603	-2.42829	-1.4412
NaN	-0.868457	-0.925938	NaN	-1.80424	NaN	NaN	NaN	-0.887431	-1.79876	NaN	-0.229186	-1.28393	-1.2421	-1.20793	-1.16447	NaN	-1.26444	NaN	-1.28189	-1.45689	NaN	-1.53847	-2.04761	NaN	NaN	NaN	-0.984016	NaN	NaN	NaN	NaN	-0.943094	-1.91158	NaN	-1.36446	NaN	-1.36229	-1.54827	NaN	-1.63497	NaN	-0.944683	NaN	NaN	NaN	-0.905397	-1.83517	-1.30992	-1.29004
1.83502	1.06672	NaN	0.677404	1.93072	1.45716	NaN	0.0281442	1.81778	1.49842	0.895247	0.394401	1.79021	1.20404	1.36072	0.850517	0.362385	1.44682	NaN	1.35718	1.40908	NaN	1.09987	1.14576	NaN	1.4461	1.79134	NaN	0.66128	1.42247	NaN	0.0274743	1.77452	1.46276	0.873939	1.7476	NaN	1.32488	1.37554	NaN	1.07369	1.41168	NaN	0.722456	1.55407	NaN	1.93868	1.59808	1.90927	1.54304
NaN	1.10126	0.569804	0.55274	0.884321	1.68703	0.492057	0.259388	1.41161	0.839691	1.13591	0.253936	0.883111	1.09519	0.443045	1.27298	1.09966	1.18373	NaN	0.645972	0.195805	0.700229	1.20487	1.3849	0.243725	0.453937	NaN	0.556242	0.539584	1.64688	0.480346	0.253214	1.37802	0.819706	1.10887	0.862091	NaN	0.630597	0.191144	0.683562	1.17619	0.443133	0.6077	0.589501	1.79923	0.524783	1.5055	0.895537	0.941844	1.26246
NaN	1.25592	NaN	1.3691	NaN	0.80072	NaN	1.05372	1.71806	1.31442	1.17257	1.35922	1.82923	1.67912	1.31432	NaN	NaN	1.4314	NaN	NaN	1.22064	NaN	NaN	1.5923	NaN	1.71173	NaN	NaN	1.33651	0.781661	NaN	1.02864	1.67716	1.28313	1.14466	1.78569	NaN	NaN	1.19159	NaN	NaN	1.67099	NaN	1.46015	0.853973	NaN	1.83232	1.40184	1.95089	1.52659
NaN	-0.144727	NaN	NaN	0.884006	1.00378	NaN	NaN	0.872654	0.243697	-0.192661	-1.32285	0.133781	-0.192233	NaN	0.148192	NaN	0.129217	0.758251	0.0720924	NaN	NaN	0.489878	1.33467	0.193841	0.232587	NaN	NaN	NaN	0.979893	NaN	NaN	0.851884	0.237897	-0.204745	0.130597	0.740203	0.0703765	NaN	NaN	0.478218	0.227051	NaN	NaN	1.07054	NaN	0.930692	0.259905	0.142678	0.13781
NaN	-0.813492	-1.10156	-2.08517	-0.326431	-0.915193	-2.06523	-2.24306	-0.12724	-2.18481	-0.346247	-0.149134	-0.994765	-1.43058	-0.224159	-0.12595	-2.45471	-1.16602	NaN	-1.45882	-1.6281	-1.74339	-1.49206	-0.778649	NaN	-0.658909	NaN	-1.17065	-2.21596	-0.972597	-2.19477	-2.38376	-0.135221	-2.32185	-0.367965	-1.05716	NaN	-1.55032	-1.73021	-1.85274	-1.58565	-0.700238	-1.12386	-2.12739	-0.933721	-2.10704	-0.129816	-2.22904	-1.0149	-1.18962
-0.270805	-0.865609	-1.17126	-2.19685	-0.719207	-0.997755	-2.20846	-2.29681	-0.635933	-1.73504	-0.833455	-0.591251	-1.50363	-1.70345	-0.524881	-0.395918	-2.12472	-1.63041	-1.18798	-1.41596	-1.50329	-2.51431	-1.29694	-1.10661	-0.498745	-1.15205	-0.287791	-1.24472	-2.33464	-1.06034	-2.34698	-2.44087	-0.675821	-1.84387	-0.885732	-1.59794	-1.2625	-1.50477	-1.59758	-2.67201	-1.37829	-1.22431	-1.19497	-2.24132	-1.01795	-2.25317	-0.648807	-1.77017	-1.53407	-1.66342
NaN	NaN	NaN	-2.53662	NaN	-1.2139	-2.07398	-2.14724	-0.536377	-2.4813	NaN	-0.483774	-1.29003	-0.705908	0.445893	-0.488586	-2.50307	-1.64322	-1.75131	-1.32768	NaN	-2.61027	NaN	NaN	-0.512952	-1.2189	NaN	NaN	-2.69573	-1.29004	-2.20407	-2.28193	-0.570021	-2.63693	NaN	-1.37094	-1.86116	-1.41096	NaN	-2.774	NaN	-1.29536	NaN	-2.58797	-1.23847	-2.11597	-0.547236	-2.53153	-1.31614	-1.67648
-0.383715	-0.951358	-1.28459	-2.84278	-0.776811	-1.11998	-2.28081	-2.61763	-0.561644	-2.59787	-0.876696	-0.625594	-1.49647	-1.77971	-0.564517	-0.315056	-2.32849	-1.66618	-1.96372	-1.57866	-2.08281	-2.55215	-1.51009	-0.788271	-0.618795	-1.06946	-0.407783	-1.36517	-3.02109	-1.19023	-2.42387	-2.78181	-0.596872	-2.76082	-0.931685	-1.59033	-2.08689	-1.67768	-2.21345	-2.71223	-1.6048	-1.13654	-1.3106	-2.90033	-1.14265	-2.32699	-0.573014	-2.65046	-1.52676	-1.69991
NaN	-0.418593	-0.952289	-2.15969	-0.398869	-0.723963	-1.84125	-1.91456	-0.470987	-2.09373	-0.305406	-0.283644	-0.909855	-1.52415	-0.264318	NaN	NaN	-1.37785	-1.1426	-1.05448	-1.1934	-2.09545	-1.24134	NaN	-0.0936652	-0.897007	NaN	-1.01202	-2.29516	-0.769372	-1.95674	-2.03465	-0.500529	-2.22506	-0.324562	-0.966924	-1.21427	-1.12062	-1.26825	-2.22689	-1.3192	-0.95327	-0.971567	-2.20341	-0.738619	-1.87852	-0.480522	-2.13612	-0.928274	-1.40574
NaN	-0.710085	-1.08953	-2.16953	-0.161872	-0.900583	-0.344739	-2.17931	-0.358604	-2.25302	-0.380804	-0.336336	-1.00327	-1.55483	-0.189528	-0.0160459	-1.86091	-1.29316	NaN	-1.20537	-1.05599	NaN	-1.05885	-0.743929	-0.100538	-0.507793	NaN	-1.15787	-2.30561	-0.957071	-0.366362	-2.31601	-0.381097	-2.39434	-0.404689	-1.0662	NaN	-1.28098	-1.12223	NaN	-1.12526	-0.539644	-1.11159	-2.21345	-0.918815	-0.351718	-0.365863	-2.29863	-1.02358	-1.31934
0.511349	-0.19003	-0.256169	-0.221838	0.0878464	0.151259	0.224379	-0.0794273	0.0913299	-0.330976	0.0805358	0.136871	0.0178674	0.419737	0.087709	-0.0587112	0.710613	0.118969	0.394833	-0.217768	-0.494727	-0.097808	-0.14116	-0.0729367	0.0818982	0.00629296	0.499178	-0.272237	-0.235752	0.147659	0.219039	-0.0844093	0.0891561	-0.351736	0.078619	0.0174422	0.385436	-0.231427	-0.525757	-0.103943	-0.150014	0.00614318	-0.261355	-0.226329	0.161319	0.239302	0.0974039	-0.337676	0.0190557	0.126881
NaN	-0.587131	-0.0707231	-0.244792	-1.25847	0.351892	-1.55688	NaN	0.19592	-0.401127	0.555797	-0.206783	NaN	0.0389115	0.0502271	0.435987	-2.00483	-0.417532	NaN	-0.411655	-0.0946286	NaN	0.30594	0.726753	-0.0135796	-0.155728	NaN	-0.075159	-0.260146	0.343516	-1.65453	NaN	0.191257	-0.426286	0.542568	NaN	NaN	-0.437475	-0.100564	NaN	0.298658	-0.165496	-0.0721548	-0.249748	0.375295	-1.5884	0.208951	-0.409247	NaN	-0.425985
NaN	1.66199	-0.217672	NaN	1.25711	NaN	1.55336	1.52407	1.70033	1.73977	0.796929	1.64179	1.8273	2.47092	1.25049	0.276274	1.23966	1.53113	0.125887	NaN	1.67118	1.88093	1.59666	0.96899	1.0045	1.49199	NaN	-0.231325	NaN	NaN	1.51638	1.4878	1.65986	1.69836	0.777961	1.78381	0.12289	NaN	1.6314	1.83616	1.55866	1.45647	-0.222078	NaN	NaN	1.65666	1.81342	1.85548	1.94883	1.63296
NaN	0.999812	NaN	1.72954	0.945406	-0.573937	1.19635	NaN	1.00818	1.56297	-0.0631351	1.50415	0.997615	1.12685	0.450484	NaN	1.20369	NaN	NaN	1.00764	1.20469	1.68615	0.722633	1.09186	NaN	0.795723	NaN	NaN	1.68838	-0.609936	1.16788	NaN	0.984187	1.52577	-0.0670951	0.97387	NaN	0.983661	1.17601	1.64602	0.705434	0.776784	NaN	1.84457	-0.585556	1.27592	1.07523	1.66692	1.06396	NaN
-0.405668	-0.583578	-0.391246	-0.840336	-0.847543	0.154697	-0.306236	-0.387848	-0.125156	-0.565654	-0.414054	-0.463118	-0.898178	-0.409907	-0.879826	-0.624324	-0.264466	-0.913086	-0.676039	-0.942942	-0.704296	-1.64443	-0.0351746	-0.0406143	-0.130675	0.0207781	-0.431113	-0.415786	-0.893044	0.151015	-0.325445	-0.412175	-0.133006	-0.601133	-0.440025	-0.954514	-0.718442	-1.00209	-0.748471	-1.74757	-0.0373808	0.0202836	-0.399166	-0.857348	0.164986	-0.312436	-0.127689	-0.577105	-0.916361	-0.931571
NaN	-0.914361	-0.939284	-1.3625	-0.851501	-0.199387	-0.688112	-1.22119	-0.628528	-1.11574	-0.380145	-0.85217	-0.920865	-0.686991	-1.01405	-0.406601	-0.619571	-1.16483	-0.321761	-1.11353	NaN	-1.36195	-0.617989	-0.59691	-0.743828	-0.960433	NaN	-0.998199	-1.44796	-0.211893	-0.731273	-1.29778	-0.667952	-1.18572	-0.403988	-0.978625	-0.341943	-1.18338	NaN	-1.44737	-0.656751	-1.02067	-0.958299	-1.39009	-0.203423	-0.702042	-0.641253	-1.13833	-0.939507	-1.18841
NaN	NaN	-1.20432	-1.58822	NaN	-0.526937	-1.05449	-1.87036	-0.932443	-1.81539	-0.710691	-1.98236	-1.99441	-1.18446	-1.43501	-1.0347	-1.06442	-2.47407	-0.0276399	NaN	-2.15772	-1.47351	-1.15888	-1.08035	-1.45512	-1.06276	NaN	-1.27986	-1.68783	-0.559988	-1.12063	-1.98767	-0.990929	-1.92926	-0.755268	-2.11951	-0.0293736	NaN	-2.29306	-1.56593	-1.23157	-1.12942	-1.2287	-1.62037	-0.537604	-1.07584	-0.95132	-1.85214	-2.03479	-2.52416
NaN	-0.146384	0.128754	-1.69635	0.371504	0.512683	-0.501855	-0.893594	-0.302654	-0.625029	0.519407	-0.508894	-0.541147	NaN	-0.0176697	0.650651	-0.221304	-0.279	-1.34439	-0.152594	-0.988611	-0.748124	0.0895646	-0.545095	-0.736152	-1.29266	NaN	0.125689	-1.80275	0.50048	-0.533333	-0.949643	-0.321637	-0.664233	0.507045	-0.57509	-1.42871	-0.162165	-1.05062	-0.795049	0.0874328	-1.37374	0.137317	-1.73069	0.54678	-0.512015	-0.308781	-0.637682	-0.552102	-0.284648
NaN	0.857796	NaN	NaN	NaN	2.44655	1.26675	1.9531	1.16236	0.858084	2.53481	-0.191309	1.15203	1.28244	0.694322	1.36651	2.17409	0.562575	NaN	0.783221	2.07745	NaN	1.32343	2.77846	NaN	NaN	NaN	NaN	NaN	2.38832	1.2366	1.90661	1.1347	0.83766	2.47448	1.12461	NaN	0.76458	2.028	NaN	1.29193	NaN	NaN	NaN	2.60927	1.351	1.23967	0.915152	1.22865	0.59999
NaN	-1.19757	-1.00642	NaN	-0.958203	-0.735726	-0.548573	-0.689745	-0.692565	-1.0521	-1.23803	-0.373517	NaN	NaN	-1.11228	-1.13808	NaN	NaN	NaN	NaN	-1.08577	NaN	-1.15424	-0.833256	NaN	-1.22686	NaN	-1.06954	NaN	-0.781873	-0.582982	-0.733008	-0.736005	-1.11809	-1.31568	NaN	NaN	NaN	-1.15387	NaN	-1.22664	-1.30381	-1.02679	NaN	-0.75062	-0.559679	-0.706586	-1.0734	NaN	NaN
-1.26895	-1.85092	-4.66576	-1.90057	-2.77917	-1.19832	-4.33142	-2.1312	-3.36958	-2.65416	-4.01258	-4.89338	-3.09666	-1.81659	-5.09651	-3.68234	-1.71033	-2.62311	-4.23966	-2.8043	-5.58747	-1.93838	-1.26742	-5.12829	-4.6516	-1.88113	-1.34854	-4.95842	-2.01978	-1.27349	-4.6031	-2.26487	-3.58093	-2.82063	-4.26426	-3.29089	-4.50558	-2.98019	-5.93794	-2.05997	-1.34692	-1.99912	-4.76022	-1.93904	-1.22258	-4.4191	-3.43779	-2.70789	-3.15935	-2.67621
NaN	0.389794	-0.19537	1.37225	-0.693869	-0.579594	0.728496	0.970192	2.22858	0.954784	-0.139472	0.516996	0.43166	0.192353	-0.196665	-0.297406	1.93105	0.980424	-0.172222	-0.311359	0.891114	1.30595	0.63155	1.42658	0.0617388	0.602135	NaN	-0.207624	1.33959	-0.615948	0.711157	0.9471	2.17554	0.932059	-0.14822	0.421386	-0.183024	-0.330889	0.869904	1.27487	0.616518	0.587803	-0.199325	1.46352	-0.591327	0.776946	2.3768	1.01828	0.460368	1.04563
NaN	1.99946	4.36684	NaN	2.72553	3.24576	NaN	NaN	3.13037	1.00301	2.86162	0.886938	1.61737	2.19528	2.18332	2.9399	NaN	1.33499	NaN	1.31561	NaN	NaN	2.80744	3.35099	NaN	2.80944	NaN	4.2629	NaN	3.16851	NaN	NaN	3.05586	0.979137	2.79351	1.57887	NaN	1.28429	NaN	NaN	2.74062	2.74257	4.65726	NaN	3.46162	NaN	3.33856	1.06972	1.72493	1.42377
NaN	0.464661	1.89772	0.547642	0.856499	2.31728	1.36168	0.116372	1.49198	0.403708	0.538299	0.915951	0.788118	0.896139	0.847324	1.40295	1.49338	1.00357	1.84819	0.722314	0.64576	0.579936	1.06721	1.69179	1.10076	1.63611	NaN	1.85256	0.534607	2.26212	1.32927	0.113602	1.45647	0.394099	0.525487	0.76936	1.8042	0.705122	0.63039	0.566132	1.04181	1.59717	2.02394	0.584064	2.47139	1.45224	1.59121	0.430557	0.840534	1.07032
NaN	0.713931	1.50014	0.189762	0.618328	1.5234	NaN	NaN	1.12204	-0.112513	0.719177	0.467364	NaN	0.54812	1.05611	1.43797	NaN	NaN	NaN	0.225212	NaN	NaN	0.838406	0.95484	NaN	0.805726	NaN	1.46444	0.185245	1.48714	NaN	NaN	1.09533	-0.11957	0.70206	NaN	NaN	0.219852	NaN	NaN	0.818451	0.786548	1.59991	0.202382	1.62472	NaN	1.19666	-0.11479	NaN	NaN
NaN	0.199163	NaN	NaN	-0.368993	-0.868059	NaN	0.199104	-1.30046	-1.65956	0.675754	-0.891286	-0.423178	-0.134566	-0.224159	-0.761629	NaN	-0.0872889	NaN	-0.393536	-0.503167	NaN	-1.84991	-0.271038	NaN	NaN	NaN	NaN	NaN	-0.922507	NaN	0.194365	-1.38203	-1.76365	0.65967	-0.449721	NaN	-0.41822	-0.534727	NaN	-1.96594	NaN	NaN	NaN	-0.885633	NaN	-1.32679	-1.69315	-0.431745	-0.089056
NaN	-1.44344	-1.11921	-1.66587	-0.535179	-0.18176	-0.959959	-1.52016	-1.0254	-1.73378	-0.136494	-0.808059	-1.64937	-1.00984	-1.75298	-1.16594	-0.604742	-1.6856	-0.802885	-1.36724	-1.6857	NaN	-1.41235	-0.802071	-0.748264	-1.49179	NaN	-1.18941	-1.77035	-0.19316	-1.02017	-1.61551	-1.08972	-1.84253	-0.145055	-1.75283	-0.853244	-1.45299	-1.79144	NaN	-1.50093	-1.58536	-1.14187	-1.69959	-0.185439	-0.979392	-1.04616	-1.76888	-1.68276	-1.71973
NaN	0.617686	2.61435	NaN	NaN	1.63765	2.0143	1.12574	0.745333	0.627935	1.72259	0.334631	0.809646	0.630508	0.750231	1.20247	1.10648	NaN	NaN	0.65041	0.957779	NaN	1.15042	0.972026	NaN	1.24209	NaN	2.55212	NaN	1.59867	1.96635	1.09895	0.727593	0.61299	1.68159	0.790375	NaN	0.634929	0.934983	NaN	1.12304	1.21252	2.78822	NaN	1.74656	2.14826	0.794903	0.669697	0.863493	NaN
NaN	-0.278168	NaN	0.623983	-0.822752	-0.398323	NaN	0.883694	-0.386278	0.301333	0.0653511	0.453246	-0.181426	NaN	-0.43129	-1.42228	NaN	0.219845	-0.684552	NaN	0.468791	1.04275	-0.303539	0.601913	NaN	0.404249	NaN	NaN	0.609131	-0.423307	NaN	0.86266	-0.410506	0.294161	0.0637956	-0.192806	-0.727489	NaN	0.457633	1.01793	-0.322578	0.394628	NaN	0.665482	-0.406386	NaN	-0.394098	0.321374	-0.185099	0.234467
NaN	0.702381	NaN	0.685511	0.0259289	NaN	0.289715	1.22688	-0.0175558	0.571526	0.471201	0.898814	0.382429	0.688249	0.168585	0.144636	0.0269937	1.21075	NaN	0.436008	0.966363	NaN	0.026136	0.247295	-0.754285	NaN	NaN	NaN	0.669195	NaN	0.28282	1.19767	-0.0186569	0.557923	0.459985	0.373326	NaN	0.425631	0.943362	NaN	0.0255139	NaN	NaN	0.731102	NaN	0.308983	-0.0179112	0.609537	0.407863	1.29127
NaN	1.54081	0.184016	0.457973	0.852746	-0.97398	NaN	1.21987	-0.144942	0.778551	0.289967	NaN	1.0848	1.56223	1.22192	0.804961	0.664402	1.33938	-0.00223344	2.22296	0.716259	1.21102	0.605662	NaN	0.422758	0.114044	NaN	0.179636	0.447073	-1.03507	NaN	1.19084	-0.154034	0.760021	0.283065	1.05898	-0.00237353	2.17005	0.699211	1.1822	0.591246	0.111329	0.196254	0.488432	-0.993698	NaN	-0.147877	0.83033	1.15695	1.42846
0.182032	-0.698093	-0.226157	NaN	0.149665	0.339739	0.23888	-0.838642	0.0106753	NaN	0.141884	-0.411298	NaN	-0.330987	-3.10046	-0.207642	-0.310346	0.116101	-1.09803	-0.261026	-0.30973	NaN	-0.397647	0.543889	-0.219855	0.425709	0.177699	-0.240342	NaN	0.331653	0.233195	-0.891245	0.0104212	NaN	0.138507	NaN	-1.1669	-0.277399	-0.329157	NaN	-0.422589	0.415576	-0.230735	NaN	0.362334	0.254768	0.0113853	NaN	NaN	0.123823
1.18046	0.481391	1.09282	-0.253152	0.0893584	-0.548496	0.104002	0.143058	0.134811	0.438527	0.345745	0.777205	0.650154	0.657498	0.255424	-0.560852	-0.52769	0.463255	-0.238786	0.636521	0.440431	0.490095	-0.299184	-0.256544	1.08202	0.627897	1.15236	1.06681	-0.26903	-0.582899	0.101526	0.139653	0.131603	0.428089	0.337515	0.63468	-0.253763	0.621371	0.429948	0.47843	-0.31795	0.612953	1.1655	-0.258277	-0.5596	0.110919	0.143777	0.467692	0.693394	0.494065
NaN	0.618825	-0.456803	NaN	-0.689742	NaN	-0.171264	NaN	-0.410202	0.354539	0.622929	0.454791	0.453452	0.295587	0.691263	-0.560852	NaN	0.449183	-0.825127	0.169725	0.0756919	NaN	-0.0873765	-0.0518061	-0.157211	0.705546	NaN	-0.485455	NaN	NaN	-0.182006	NaN	-0.435931	0.3461	0.608102	0.442659	-0.876881	0.165686	0.0738904	NaN	-0.092857	0.688753	-0.466051	NaN	NaN	-0.174731	-0.418506	0.378118	0.483609	0.479057
0.878323	0.505663	0.815405	-0.336381	0.0721369	NaN	-0.171264	0.286163	0.206981	0.315916	0.576303	0.709356	0.753495	0.708166	0.555732	-0.0981784	-0.269059	0.425582	-0.20161	0.818482	0.533049	0.206899	-0.439557	-0.280042	1.38432	0.579705	0.857418	0.795997	-0.35748	NaN	-0.182006	0.279352	0.202055	0.308396	0.562586	0.735561	-0.214256	0.799001	0.520362	0.201974	-0.467127	0.565907	0.869635	-0.343191	NaN	-0.174731	0.220747	0.336926	0.803608	0.453887
NaN	-1.60307	NaN	NaN	-1.04726	-0.334009	NaN	NaN	-0.983063	-2.51757	-1.19677	-1.32089	NaN	-1.68461	-1.61332	-1.09687	NaN	NaN	NaN	-0.292376	-2.00828	NaN	-1.11862	-1.45988	NaN	-1.74887	NaN	NaN	NaN	-0.354959	NaN	NaN	-1.04472	-2.67548	-1.27183	NaN	NaN	-0.310715	-2.13425	NaN	-1.18879	-1.85857	NaN	NaN	-0.340771	NaN	-1.00296	-2.56854	NaN	NaN
NaN	-0.520575	0.0729687	0.145289	0.104179	0.45091	0.166166	-0.320587	0.326158	-0.0435316	0.255479	-0.150294	0.100682	0.215702	0.16972	0.199039	0.378657	0.207257	-0.164656	-0.234093	NaN	0.228631	-0.0554437	0.0971646	0.137421	0.2285	NaN	0.071232	0.141831	0.440177	0.162211	-0.340695	0.318395	-0.0462621	0.249399	0.0982854	-0.174984	-0.248777	NaN	0.223189	-0.0589213	0.223062	0.0778217	0.154952	0.480898	0.177217	0.34785	-0.0444129	0.107378	0.221041
NaN	-0.0760714	-1.66212	-2.0677	-1.29649	-1.72054	-3.25017	0.136453	NaN	-1.5435	-1.12554	-1.47826	-1.00567	-0.404816	0.45456	-1.08319	-2.2693	0.0280228	NaN	-0.640807	-0.854568	-0.617423	-3.48521	-3.08385	-0.38672	-1.6653	NaN	-1.76638	-2.19739	-1.82846	-3.45403	0.133206	NaN	-1.64032	-1.19614	-1.06875	NaN	-0.681001	-0.908169	-0.65615	-3.70381	-1.76975	-1.69577	-2.10956	-1.75537	-3.31596	NaN	-1.57475	-1.02603	0.0298865
NaN	-0.613616	-2.27976	-2.67292	-0.846188	-1.73465	NaN	0.305697	-3.01677	-1.53205	-0.970926	NaN	-1.53307	-0.248938	0.876404	-1.10671	-1.93419	-0.444348	NaN	-0.354913	-0.925067	NaN	-4.23747	-2.27798	NaN	NaN	NaN	-2.42276	-2.84057	-1.84346	NaN	0.298421	-3.20599	-1.62815	-1.03183	-1.62923	NaN	-0.377174	-0.983091	NaN	-4.50325	NaN	-2.32592	-2.72703	-1.76977	NaN	-3.07784	-1.56307	-1.5641	-0.453343
0.947181	-0.561181	NaN	-0.47695	0.0557811	0.437997	-1.03788	-0.337132	-0.210757	-0.39226	-0.013521	1.18833	-0.522186	-0.362066	0.27927	-0.182063	NaN	-0.487035	NaN	-0.501032	-0.508205	NaN	-0.544493	0.333278	-0.301822	0.361224	0.924637	NaN	-0.506866	0.427572	-1.10298	-0.358278	-0.223977	-0.416864	-0.0143691	-0.554939	NaN	-0.532458	-0.540082	NaN	-0.578645	0.352626	NaN	-0.486606	0.467126	-1.05889	-0.215024	-0.400201	-0.532757	-0.496894
0.0929184	-0.533161	NaN	NaN	-1.21413	-0.61777	-2.21562	NaN	-1.5659	-0.402637	-0.261824	0.071777	-0.0344948	-0.0231041	0.358007	-1.0121	-1.12224	-0.687878	NaN	-0.443699	NaN	-0.822847	-1.40307	-0.892302	NaN	-0.28617	0.0907068	NaN	NaN	-0.656519	-2.35459	NaN	-1.66411	-0.427892	-0.278246	-0.0366584	NaN	-0.47153	NaN	-0.874459	-1.49107	-0.30412	NaN	NaN	-0.630276	-2.26047	-1.5976	-0.410788	-0.0351931	-0.701804
-0.0697666	-0.241691	NaN	1.08319	-0.795428	-0.0210533	-2.63456	0.272244	0.498193	0.0911027	-1.00912	-1.22226	NaN	-1.0637	1.17993	-0.139281	0.328507	NaN	-0.780412	-0.53098	0.229623	0.719363	0.815341	NaN	NaN	NaN	-0.0741426	NaN	1.05741	-0.0223738	-2.79981	0.265764	0.486336	0.0889343	-1.07242	NaN	-0.829362	-0.564285	0.224158	0.702241	0.795935	NaN	NaN	1.15523	-0.0214795	-2.68789	0.531327	0.0971616	NaN	NaN
0.122623	0.210141	1.13118	1.17646	-0.789282	-0.159275	-3.03992	0.344318	0.756093	0.325298	-1.84658	-0.701656	-0.602417	-0.874342	1.76238	0.000782247	NaN	0.230379	-0.481506	NaN	0.327547	0.763964	0.705068	-1.34083	0.720131	0.681115	0.119705	1.10425	1.14846	-0.169265	-3.2306	0.336123	0.738097	0.317555	-1.9624	-0.640202	-0.511708	NaN	0.319751	0.74578	0.688286	0.664904	1.20641	1.2547	-0.162499	-3.10146	0.806378	0.346932	-0.614612	0.245701
NaN	-0.310969	0.478994	0.116435	0.200348	0.861287	0.574061	0.114964	0.16135	0.0216492	0.355012	-0.00533661	0.436897	0.226381	0.161208	0.312755	0.354832	-0.0227955	0	0.304842	-0.026608	0.167629	0.619118	0.172671	NaN	0.168102	NaN	0.467593	0.113664	0.840787	0.560398	0.112228	0.157509	0.0211339	0.346562	0.426499	0	0.297587	-0.028277	0.163639	0.604382	0.1641	0.51085	0.124179	0.918569	0.61224	0.17208	0.023089	0.465954	-0.0232569
NaN	-0.640708	0.0339719	-0.602084	-0.359052	-0.517536	-0.288334	-0.639294	0.0920041	NaN	-0.752725	-0.476368	-0.350996	-0.178417	-0.549447	-0.390312	-0.225143	-0.460339	NaN	-0.504022	NaN	NaN	-0.29884	-0.372103	-0.578431	-0.347915	NaN	0.0331633	-0.639849	-0.549997	-0.306419	-0.679393	0.0898143	NaN	-0.799939	-0.373011	NaN	-0.535636	NaN	NaN	-0.317584	-0.369738	0.0362313	-0.614273	-0.528013	-0.294171	0.098123	NaN	-0.358101	-0.469658
NaN	-1.06913	-2.32351	-3.37825	NaN	NaN	NaN	0.284201	-2.48276	-0.446412	-0.414146	0.175032	-0.514437	-0.4116	-1.35028	-2.3579	NaN	-0.168746	-2.35143	-0.00880803	-0.418971	NaN	NaN	-2.28005	-2.33213	NaN	NaN	-2.46925	-3.59014	NaN	NaN	0.277437	-2.63849	-0.474412	-0.440123	-0.546704	-2.49891	-0.0093605	-0.44525	NaN	NaN	NaN	-2.37055	-3.44664	NaN	NaN	-2.53303	-0.455449	-0.524852	-0.172163
NaN	0.366768	1.19013	0.409481	0.214926	-0.259995	0.208616	NaN	NaN	0.169932	0.17004	-0.507546	NaN	NaN	0.627841	-0.148371	NaN	NaN	NaN	0.0251781	0.455767	0.770551	0.585079	0.670547	0.403038	NaN	NaN	1.16181	0.399735	-0.276303	0.203651	NaN	NaN	0.165887	0.165993	NaN	NaN	0.0245788	0.444919	0.752211	0.571153	NaN	1.26929	0.436715	-0.265259	0.222491	NaN	0.181234	NaN	NaN
-0.438159	0.0676943	0.177545	0.106614	-0.118382	-1.23453	-0.718398	-0.0892653	-0.287736	0.505019	-0.964248	0.120917	0.343504	0.0728436	0.0326387	-0.855614	-0.688357	0.32634	-0.634141	0.219085	0.223276	0.291975	-0.133289	-0.871176	-0.236963	-0.00155118	-0.465641	0.17332	0.104077	-1.31197	-0.763458	-0.0948643	-0.305784	0.492999	-1.02473	0.335328	-0.673916	0.21387	0.217961	0.285026	-0.141649	-0.00164847	0.189353	0.113705	-1.25952	-0.732942	-0.293561	0.538607	0.366349	0.348044
NaN	-0.126521	NaN	NaN	NaN	-1.81761	NaN	0.541698	-1.69856	0.118942	-0.538864	-0.31355	0.0184324	0.287183	-0.728513	-0.924565	-1.25389	0.12219	NaN	-0.177692	NaN	0.103699	-1.22825	NaN	NaN	NaN	NaN	NaN	NaN	-1.93161	NaN	0.528804	-1.8051	0.116111	-0.572663	0.0179937	NaN	-0.188837	NaN	0.101231	-1.30529	NaN	NaN	NaN	-1.8544	NaN	-1.73294	0.126852	0.0196583	0.130316
NaN	-2.88902	-3.51691	-2.11314	-3.14293	-1.88933	-1.84604	-2.18737	-1.4354	-2.12006	-3.04606	-2.23703	-2.02172	-2.45433	-3.15185	-1.53528	-2.25041	-2.24148	-1.51407	-2.7503	-2.26384	-2.54249	-1.73762	-2.22108	-1.3205	-2.33804	NaN	-3.7375	-2.24568	-2.00784	-1.96183	-2.32457	-1.52543	-2.25304	-3.23712	-2.14852	-1.60904	-2.92281	-2.40584	-2.70196	-1.84661	-2.48468	-3.5881	-2.15592	-1.92758	-1.88341	-1.46446	-2.16298	-2.06264	-2.28686
-3.63418	NaN	NaN	-2.52659	NaN	-2.13901	-2.98378	-2.05289	NaN	NaN	-4.14853	-3.18972	-3.63957	-3.62141	-3.65503	NaN	-1.94905	-4.05347	-3.04148	-2.28674	-3.22378	-2.12007	-2.70747	-3.54835	-2.25177	-3.83318	-3.86213	NaN	-2.68507	-2.27318	-3.17093	-2.18165	NaN	NaN	-4.40874	-3.86785	-3.23225	-2.43018	-3.42598	-2.25305	-2.87729	-4.07361	NaN	-2.57774	-2.18231	-3.04419	NaN	NaN	-3.71325	-4.13553
NaN	2.10939	NaN	2.00754	NaN	NaN	1.15385	1.7353	-0.497069	2.44464	0.15069	1.81479	2.91913	0.260821	1.84019	NaN	NaN	2.59647	1.55009	2.93701	2.32186	NaN	1.31548	NaN	NaN	0.803586	NaN	NaN	1.95976	NaN	1.12639	1.694	-0.528247	2.38645	0.147103	2.84965	1.5132	2.86711	2.2666	NaN	1.28417	0.784459	NaN	2.14106	NaN	1.23059	-0.507132	2.60723	3.11327	2.76915
NaN	0.187453	-0.47496	NaN	2.12433	-0.337421	-0.0991568	0.4654	0.137717	0.0528169	0.00191162	0.097927	-0.0930062	0.421996	-0.124828	0.0984751	NaN	-0.0567379	-0.0349763	0.00451597	0.308511	NaN	-0.157278	0.13235	1.49376	-0.0748457	NaN	-0.504751	NaN	-0.358585	-0.105376	0.454322	0.134439	0.0515598	0.00186612	-0.0988399	-0.0371701	0.00440848	0.301168	NaN	-0.167143	-0.0795403	-0.484575	NaN	-0.344252	-0.101164	0.146876	0.0563296	-0.0948891	-0.0578865
-0.180338	-0.376141	NaN	NaN	-0.453991	-0.0673846	-0.524954	-0.396198	-0.406722	-0.816817	-0.249009	-0.841995	-0.359302	-0.267586	-0.359648	-0.0393262	0.147251	NaN	NaN	-0.304042	-0.342604	NaN	-0.15116	-0.317349	-0.524312	NaN	-0.191649	NaN	NaN	-0.0716112	-0.55788	-0.421049	-0.432233	-0.86805	-0.264628	-0.381839	NaN	-0.323112	-0.364093	NaN	-0.160641	NaN	NaN	NaN	-0.0687487	-0.535581	-0.414956	-0.833352	-0.366576	NaN
NaN	-5.40009	-3.67695	NaN	-3.12716	-2.37724	NaN	-2.07826	-3.74984	-3.94192	-4.09809	-2.75609	-2.8037	-5.39267	-3.89117	-3.31597	NaN	-2.58487	-2.03946	-3.55047	NaN	NaN	-5.07809	-4.96033	-3.30196	-4.28446	NaN	-3.90758	NaN	-2.52635	NaN	-2.20862	-3.98504	-4.18917	-4.35514	-2.97956	-2.16738	-3.77316	NaN	NaN	-5.3966	-4.5532	-3.75138	NaN	-2.42537	NaN	-3.82575	-4.02172	-2.86046	-2.6372
1.1047	0.0074982	0.571237	0.465534	NaN	1.05756	0.0507492	0.775192	1.11695	0.301879	0.428816	NaN	0.0999709	NaN	NaN	0.314906	1.02094	0.201491	1.56492	-0.120894	0.467196	0.545003	0.348511	0.775503	NaN	0.40312	1.07841	0.557641	0.454454	1.03239	0.0495413	0.756742	1.09037	0.294694	0.41861	0.0975914	1.52767	-0.128477	0.456076	0.532031	0.340216	0.393526	0.609228	0.496496	1.1279	0.0541244	1.19124	0.321956	0.10662	0.214891
NaN	-0.281167	-0.86227	0.271668	NaN	NaN	-0.976956	0.493783	0.356473	0.329845	-0.736591	NaN	0.537722	0.240351	-0.787405	-0.918967	0.174134	0.621991	NaN	0.217966	0.333445	0.770281	-0.491671	-0.395209	NaN	-0.0572131	NaN	-0.916354	0.265202	NaN	-1.03823	0.48203	0.347988	0.321994	-0.782792	0.524924	NaN	0.212778	0.325509	0.751947	-0.52251	-0.0608017	-0.879726	0.289736	NaN	-0.996734	0.380181	0.351782	0.573485	0.663358
NaN	-1.68118	-2.44066	-3.0129	-3.31657	-3.16057	-3.0851	-2.23332	-3.10007	-2.00212	-2.69732	-2.08079	-2.96535	-2.30374	-1.93091	-2.11497	-3.25316	-2.03868	-3.11069	-2.23248	-2.11208	NaN	-3.69148	-3.18602	-2.3972	-2.89431	NaN	-2.59375	-3.20188	-3.35881	-3.2786	-2.3734	-3.29451	-2.1277	-2.86651	-3.15135	-3.3058	-2.37251	-2.24456	NaN	-3.92302	-3.07585	-2.49007	-3.07389	-3.22456	-3.14755	-3.16282	-2.04265	-3.02538	-2.07995
-1.30181	-0.229049	-0.787741	NaN	-5.74856	-1.39596	-2.15809	-1.4964	-0.201101	-0.748565	-1.85547	0.569011	-0.406375	0.0251085	-0.652274	-0.86722	-1.2537	-1.32355	-2.37902	-0.737654	-1.70394	-0.658917	-0.796543	-1.82457	-1.54809	-0.755473	-1.38346	-0.83715	NaN	-1.48352	-2.29345	-1.59025	-0.213715	-0.795518	-1.97185	-0.431864	-2.52824	-0.783922	-1.81082	-0.700247	-0.846504	-0.802859	-0.803688	NaN	-1.42422	-2.20178	-0.205172	-0.763719	-0.414602	-1.35035
NaN	1.47069	1.10807	1.13976	-0.17465	-0.861216	NaN	2.03172	0.366123	1.53645	1.59826	0.608142	1.18897	1.19221	1.01663	0.107531	NaN	1.15488	NaN	1.50799	1.80997	1.6277	0.779751	-0.156002	2.04325	-0.0594047	NaN	1.08169	1.11263	-0.915234	NaN	1.98336	0.357409	1.49988	1.56022	1.16067	NaN	1.47209	1.76689	1.58896	0.761192	-0.0631308	1.18176	1.21556	-0.878651	NaN	0.390473	1.63864	1.26805	1.23169
NaN	0.180238	NaN	0.375851	-0.264837	0.202753	0.710033	-0.305279	-0.139032	0.208087	-0.579849	0.446701	-0.212156	-0.517552	0.203719	0.29827	1.01917	-0.696701	0.472704	-0.207869	0.00879241	-0.0675515	0.0140749	0.127645	NaN	NaN	NaN	NaN	0.366906	0.197927	0.693133	-0.324427	-0.147752	0.203134	-0.616219	-0.225463	0.461453	-0.220907	0.00858314	-0.0717886	0.0137399	NaN	NaN	0.400848	0.216237	0.757255	-0.141846	0.221926	-0.216451	-0.710805
NaN	-0.0525744	-0.933653	-2.48428	-1.60233	-2.2506	-1.97194	-0.335607	-1.58965	-0.356207	-1.2576	-0.663764	-0.653057	-0.245424	-0.966707	-1.91323	-2.06176	-0.166926	2.70777	-0.445461	-0.676946	-1.14464	-1.62207	-2.2299	-1.26528	-1.45689	NaN	-0.992215	-2.6401	-2.39176	-2.09562	-0.356657	-1.68935	-0.378549	-1.33648	-0.694019	2.64332	-0.473402	-0.719406	-1.21644	-1.72381	-1.54827	-0.952554	-2.53457	-2.29616	-2.01186	-1.62183	-0.363418	-0.666278	-0.170305
NaN	-0.561181	0.241566	-0.0379991	-0.970244	0.515261	0.378126	NaN	0.299057	0.110747	-0.542751	0.276114	0.173902	-0.282178	NaN	-1.36189	-0.283363	0.18076	-0.00709277	NaN	-0.258355	NaN	0.437816	-0.00568216	-1.68096	0.212043	NaN	0.235817	-0.0403825	0.502997	0.369126	NaN	0.291939	0.108111	-0.576794	0.169763	-0.00753765	NaN	-0.27456	NaN	0.427395	0.206996	0.257632	-0.0387684	0.54953	0.403274	0.318946	0.118112	0.185467	0.192782
2.17759	1.33443	0.727714	-0.233726	0.559638	-0.848324	0.200948	1.0429	-0.986532	0.758125	1.08963	0.760761	1.27285	0.343954	1.18397	0.187803	-1.55663	0.945075	0.000659721	1.06958	0.926175	0.924435	-0.786003	-0.868301	1.49248	0.42944	2.12577	0.710393	-0.248386	-0.901534	0.196165	1.01808	-1.04841	0.740081	1.0637	1.24255	0.000644019	1.04413	0.904131	0.902432	-0.835303	0.419219	0.776112	-0.238457	-0.865498	0.214312	-1.0065	0.808546	1.3575	1.00793
NaN	0.164505	NaN	NaN	1.0431	0.0288238	-0.247016	0.2477	-0.198746	0.480853	0.76019	NaN	0.0898839	0.254408	NaN	-0.375606	NaN	-0.185186	1.00575	0.0371877	0.415413	-0.503454	0.101785	NaN	NaN	NaN	NaN	NaN	NaN	0.0281377	-0.26251	0.241804	-0.211212	0.469408	0.742097	0.0877445	0.981812	0.0363026	0.405526	-0.535033	0.0993627	NaN	NaN	NaN	0.0307408	-0.252017	-0.20277	0.512833	0.0958618	-0.188935
NaN	0.80308	1.06042	0.503299	1.49322	0.992372	1.83869	0.58844	0.5516	0.520507	1.31607	0.731622	0.520111	0.945173	1.21557	0.991293	1.29241	0.310435	2.5848	1.036	0.724281	0.662902	0.914528	1.02301	1.78418	1.46476	NaN	1.03518	0.49132	0.968752	1.79493	0.574434	0.538471	0.508118	1.28474	0.507732	2.52328	1.01135	0.707042	0.647124	0.892761	1.4299	1.13095	0.536772	1.05837	1.96098	0.588286	0.555125	0.554702	0.331081
0.467521	-0.145026	-0.173588	-0.0881237	-0.0370374	0.715017	-0.00841442	-0.586269	0.00708002	-0.162334	0.0871185	-0.434878	0.0269656	-0.00166246	-0.100685	-0.0346075	0.0468323	0.120502	-0.0216605	-0.283388	-0.152657	-0.212004	-0.0561279	0.0574423	-0.0611858	0.165849	0.456393	-0.184476	-0.0936511	0.697999	-0.0089422	-0.623042	0.00691151	-0.172516	0.085045	0.0263238	-0.0230191	-0.301163	-0.162232	-0.225302	-0.0596484	0.161902	-0.177103	-0.0899077	0.762571	-0.00858476	0.00755089	-0.16562	0.028759	0.128516
NaN	0.449519	1.11258	0.508681	-0.0798298	1.82739	0.694064	0.563264	0.714518	0.489897	1.38927	-0.13566	0.0103222	0.0390834	-0.0242828	1.03947	1.17395	-0.164495	0.242802	0.137115	0.700886	0.711596	1.29005	1.28216	1.28874	-0.102918	NaN	1.0861	0.496574	1.78389	0.677544	0.549858	0.697512	0.478237	1.35621	0.0100766	0.237023	0.133851	0.684204	0.694659	1.25935	-0.109373	1.18657	0.542512	1.94892	0.740224	0.762039	0.522479	0.0110087	-0.167825
-0.309715	1.04916	-0.594059	-0.511427	1.09967	-2.01228	-0.641065	1.09231	-2.09593	0.715482	0.243117	0.482859	0.973178	0.732062	0.662107	-0.564782	-0.966422	0.824197	NaN	0.975326	0.958524	0.654979	-1.49691	-2.13449	1.41408	-0.486305	-0.329141	-0.63132	-0.543505	-2.1385	-0.681275	1.06631	-2.22739	0.698453	0.23733	0.950015	NaN	0.952112	0.93571	0.63939	-1.5908	-0.516808	-0.606085	-0.52178	-2.05302	-0.654043	-2.13836	0.763067	1.0379	0.879012
1.72395	0.594438	1.01123	0.619822	0.308502	0.989953	0.814797	0.568757	-0.164378	0.251314	0.533346	0.0130625	0.217797	0.600266	0.553103	0.4174	0.949855	0.0441338	1.55908	0.0593579	0.38388	0.601436	0.416629	0.399934	1.58777	0.593789	1.68292	0.987157	0.605069	0.966391	0.795404	0.55522	-0.174688	0.245332	0.520651	0.212613	1.52197	0.0579451	0.374743	0.587121	0.406713	0.579656	1.07848	0.661044	1.05579	0.868987	-0.167705	0.268028	0.232282	0.047069
NaN	2.52752	4.17181	2.96484	2.07168	2.97214	4.95971	2.9929	2.54784	1.97499	2.90886	1.93664	2.5739	2.19674	2.2029	2.25848	NaN	2.57282	5.89468	2.09822	2.22925	NaN	2.7469	2.21541	4.47932	2.67979	NaN	4.07251	2.89427	2.9014	4.84166	2.92166	2.4872	1.92798	2.83962	2.51264	5.75438	2.04828	2.1762	NaN	2.68152	2.616	4.44926	3.16202	3.16981	5.28957	2.71729	2.10634	2.74509	2.74393
-1.37067	-1.38942	-1.49829	-1.85256	-0.214239	-1.21141	-2.25109	-1.95382	-2.45256	-1.10905	-0.763757	-1.26807	-0.827804	-1.76501	-0.578792	-1.93541	-2.21773	-1.25822	-2.15541	0.113989	-2.39963	-2.2745	-1.84213	-1.89614	-2.43733	-1.97339	-1.45664	-1.59226	-1.96876	-1.28739	-2.39229	-2.07637	-2.6064	-1.17862	-0.811662	-0.879727	-2.2906	0.111276	-2.55014	-2.41716	-1.95767	-2.09716	-1.52862	-1.89007	-1.23593	-2.29666	-2.50221	-1.1315	-0.844562	-1.28369
NaN	-0.745891	0.25073	-0.415213	-0.340978	0.478694	-0.100302	-0.817591	-0.232049	-0.322625	0.102332	-0.146138	-0.690402	-0.504222	-0.277648	-0.110418	-0.132921	-0.511213	-0.450437	-0.525121	-0.604032	-0.42232	-0.153457	0.153182	-0.50933	0.105114	NaN	0.244762	-0.441256	0.4673	-0.106593	-0.868873	-0.246604	-0.342861	0.0998963	-0.733707	-0.47869	-0.558058	-0.641919	-0.448809	-0.163082	0.102612	0.267406	-0.423618	0.51053	-0.102332	-0.236747	-0.329156	-0.704379	-0.521562
-1.20496	-0.794613	-1.03153	-0.701408	-0.567402	-0.774377	-0.643275	-0.433126	-0.609328	-0.471817	-0.607822	-0.456869	-0.467784	-0.780644	-0.950933	-0.980335	-0.644777	-0.520272	-0.377721	-0.632584	-0.652702	-0.546626	-0.643557	-0.662974	-0.305082	-0.747149	-1.28054	-1.09623	-0.745403	-0.822948	-0.683623	-0.460293	-0.647547	-0.501411	-0.645947	-0.497125	-0.401413	-0.672261	-0.693641	-0.580912	-0.683923	-0.794013	-1.05241	-0.715607	-0.790054	-0.656297	-0.621663	-0.481369	-0.477254	-0.530805
NaN	-0.660576	NaN	NaN	NaN	-0.463508	NaN	-0.881971	NaN	-1.13092	-0.972269	-0.685421	-1.48014	-0.442575	NaN	-1.18772	NaN	-1.27116	NaN	-1.24016	-1.28889	NaN	-1.96983	-1.99416	-0.951244	-1.36436	NaN	NaN	NaN	-0.49258	NaN	-0.937291	NaN	-1.20186	-1.03325	-1.57298	NaN	-1.31795	-1.36973	NaN	-2.09338	-1.44994	NaN	NaN	-0.472891	NaN	NaN	-1.15382	-1.51011	-1.29689
NaN	-0.0873796	0.269573	NaN	0.817408	1.20132	0.44599	NaN	0.588876	-0.650243	0.325696	-0.952099	0.164625	0.908346	-0.555732	-0.0347887	0.272134	0.28339	NaN	-0.0261166	NaN	NaN	-0.00355012	-0.176982	NaN	0.322509	NaN	0.263157	NaN	1.17273	0.435375	NaN	0.57486	-0.691029	0.317944	0.160707	NaN	-0.0277548	NaN	NaN	-0.00377279	0.314832	0.287501	NaN	1.28122	0.475652	0.62804	-0.663407	0.175574	0.302238
NaN	1.59888	2.61654	1.54505	1.31175	1.35018	-0.00989784	0.350428	1.81931	1.37971	0.774644	0.47038	0.599449	-0.832557	1.69398	1.86677	NaN	0.574295	0.677596	0.656703	1.31184	NaN	1.89102	1.68254	NaN	2.07763	NaN	2.55426	1.50827	1.31805	-0.0105187	0.342088	1.77601	1.34687	0.756206	0.585181	0.661469	0.641072	1.28061	NaN	1.84601	2.02818	2.79056	1.6478	1.43998	-0.0100982	1.94031	1.47147	0.639316	0.61249
NaN	-1.15459	0.479901	NaN	NaN	NaN	-1.98864	-1.36447	NaN	-2.30248	-0.74068	-0.193748	-1.2662	-1.31741	-0.0817807	-1.29847	NaN	-1.73832	NaN	-1.27244	-0.790138	NaN	-1.34486	-1.52691	NaN	-0.467646	NaN	0.468479	NaN	NaN	-2.11337	-1.45006	NaN	-2.44689	-0.787137	-1.34562	NaN	-1.35226	-0.839698	NaN	-1.42921	-0.496978	0.511818	NaN	NaN	-2.0289	NaN	-2.34909	-1.29184	-1.77352
NaN	-0.982366	-0.302261	0.0536623	-0.599611	NaN	0.347858	-0.564786	0.44449	0.514881	-1.01003	-0.195759	-0.0600676	0.434093	-0.473077	-1.12797	-2.15917	-0.821285	-0.994461	0.41417	-0.00105492	1.05965	0.602637	-0.217788	NaN	0.2555	NaN	-0.32122	0.0523851	NaN	0.339579	-0.600211	0.43391	0.502626	-1.07338	-0.0638353	-1.05684	0.404313	-0.00112109	1.03443	0.588293	0.249419	-0.30838	0.0572313	NaN	0.370993	0.474051	0.549124	-0.0612836	-0.837911
1.22146	0.362708	1.8802	NaN	NaN	0.750972	NaN	-0.101811	NaN	0.322267	0.25465	NaN	0.509957	0.860202	NaN	NaN	1.10068	0.250724	0.799163	0.186232	0.199307	0.267399	0.645302	0.2117	0.171848	0.720313	1.19239	1.83544	NaN	0.733098	NaN	-0.108197	NaN	0.314596	0.248589	0.497819	0.780141	0.181799	0.194564	0.261034	0.629943	0.703169	2.00524	NaN	0.800917	NaN	NaN	0.3437	0.543873	0.267399
0.0311034	NaN	0.573389	NaN	NaN	0.598634	0.354832	0.0566798	NaN	NaN	0.410272	0.0457589	-0.333411	0.0507242	0.0438073	0.101943	0.396656	-0.0847274	0.572218	NaN	-0.40784	NaN	0.397728	NaN	0.372887	0.136759	0.0303631	0.559742	NaN	0.584385	0.346386	0.0553307	NaN	NaN	0.400507	-0.354323	0.558598	NaN	-0.433421	NaN	0.388261	0.133504	0.611524	NaN	0.638447	0.378431	NaN	NaN	-0.34016	-0.0864427
NaN	-0.652321	-0.308546	-0.895679	-0.759851	-0.918585	NaN	-1.09075	-0.737251	-0.601348	-0.885867	NaN	-0.462875	-0.785619	-0.830655	-0.658345	-1.20382	-0.860329	NaN	-0.472073	-0.848075	-1.02779	-0.46025	-0.831966	0.0819327	-0.785412	NaN	-0.327899	-0.951858	-0.976201	NaN	-1.15917	-0.783493	-0.639067	-0.941431	-0.491908	NaN	-0.501683	-0.901269	-1.09226	-0.489119	-0.834675	-0.314792	-0.913811	-0.937181	NaN	-0.752176	-0.613522	-0.472245	-0.877746
NaN	1.62187	0.111247	1.66533	2.16704	0.772746	NaN	0.716519	2.22524	1.13683	1.34988	2.36728	2.09373	2.26779	0.638868	0.433948	1.89325	1.47994	0.822086	1.80016	NaN	1.52127	1.1062	1.1125	1.00208	2.232	NaN	0.108599	1.62569	0.754353	NaN	0.699465	2.17228	1.10978	1.31775	2.0439	0.80252	1.75732	NaN	1.48506	1.07988	2.17888	0.118646	1.77609	0.824139	NaN	2.37324	1.21244	2.23298	1.57837
NaN	-0.364725	0.47213	-0.0839484	0.0811356	0.69325	0.345107	-0.460743	0.189139	-0.118923	-0.412587	-0.227424	-0.0652231	0.0149217	-0.11343	0.15003	0.162234	-0.146091	-0.163495	-0.014374	-0.993877	-0.230555	0.212657	0.160345	0.0860527	0.166958	NaN	0.460892	-0.0892139	0.67675	0.336893	-0.489643	0.184637	-0.126383	-0.438466	-0.0693141	-0.17375	-0.0152756	-1.05622	-0.245017	0.207596	0.162984	0.503529	-0.0856478	0.739356	0.368059	0.201718	-0.121331	-0.0665435	-0.149049
NaN	-0.156194	0.428282	-0.123564	0.0318318	0.182168	-0.012086	-0.210409	0.237717	-0.139273	-0.103719	-0.347535	0.0476402	-0.0521927	-0.224649	NaN	0.151602	NaN	-0.0766933	-0.497941	-0.303887	-0.226453	0.230867	-0.171801	-0.0952428	0.0919775	NaN	0.418089	-0.131314	0.177833	-0.0128441	-0.223606	0.232059	-0.148009	-0.110225	0.0465063	-0.0815038	-0.529174	-0.322948	-0.240657	0.225372	0.0897884	0.456766	-0.126065	0.194284	-0.0123307	0.253526	-0.142093	0.0508086	NaN
NaN	-0.179857	NaN	-1.09687	-0.510781	NaN	-0.672584	-1.30553	-1.31659	-1.66678	-0.147683	-1.15389	-1.46675	-1.22476	-0.148828	-0.337965	-0.589263	-1.83748	NaN	-1.64792	-1.02654	NaN	-0.757359	-0.730758	NaN	-0.644347	NaN	NaN	-1.16567	NaN	-0.714771	-1.38741	-1.39918	-1.77132	-0.156946	-1.55875	NaN	-1.75128	-1.09093	NaN	-0.804863	-0.684762	NaN	-1.11908	NaN	-0.6862	-1.34325	-1.70052	-1.49645	-1.87468
NaN	-0.529477	-0.633653	NaN	0.564065	-1.89523	NaN	0.953036	-1.30597	-0.298389	-0.46046	0.705164	0.0384778	NaN	-0.386936	-0.908512	NaN	NaN	NaN	NaN	0.847657	NaN	-1.81204	-1.40544	-0.712703	-0.789381	NaN	-0.673398	NaN	-2.0141	NaN	0.930353	-1.38788	-0.317105	-0.489342	0.037562	NaN	NaN	0.827481	NaN	-1.9257	-0.838894	-0.646481	NaN	-1.93359	NaN	-1.3324	-0.30443	0.0410369	NaN
NaN	2.19575	0.876408	0.643913	NaN	0.16641	NaN	2.44311	NaN	2.03123	2.55567	NaN	1.71545	2.25382	2.0307	1.81868	1.61912	1.67565	NaN	1.63286	2.26712	NaN	1.12938	1.32228	NaN	NaN	NaN	0.855549	0.628587	0.16245	NaN	2.38496	NaN	1.98289	2.49484	1.67462	NaN	1.594	2.21316	NaN	1.1025	NaN	0.934696	0.686737	0.177478	NaN	NaN	2.16632	1.82954	1.78709
1.94744	0.0912075	0.450682	0.218922	0.0163277	1.01713	0.524531	0.0595446	0.0100006	-0.237219	0.578882	-0.0201865	0.069315	-0.104577	0.0207159	0.342842	0.339175	-0.0739547	2.8126	0.00399787	0.0664702	0.0346562	0.407203	0.325237	0.390655	-0.107104	1.90109	0.439955	0.213711	0.992923	0.512047	0.0581273	0.00976254	-0.252098	0.565104	0.0676652	2.74566	0.00390271	0.0648881	0.0338314	0.397511	-0.113822	0.480655	0.233481	1.08478	0.559416	0.0106657	-0.242022	0.0739249	-0.0754519
NaN	-0.781924	-0.297329	-0.666678	-0.40789	-0.144182	-0.645311	-0.769138	-0.470298	-1.38454	-0.134542	-0.562958	-0.856671	-0.507396	-0.616008	-0.395802	-0.171639	-1.1642	NaN	-0.52668	-0.679162	-0.763265	-0.382598	-0.504113	0.0399113	-0.724339	NaN	-0.315978	-0.708494	-0.153226	-0.685787	-0.817381	-0.499796	-1.47139	-0.142981	-0.910404	NaN	-0.559715	-0.721761	-0.811139	-0.406596	-0.769772	-0.303348	-0.680174	-0.147101	-0.658375	-0.479818	-1.41257	-0.874014	-1.18777
NaN	1.67575	1.91915	NaN	NaN	NaN	NaN	0.549533	0.810394	0.623481	2.11235	1.46286	1.73013	1.11383	0.990368	1.38917	NaN	0.616764	NaN	0.533437	NaN	NaN	-0.0063894	1.28838	3.79129	2.06567	NaN	1.87347	NaN	NaN	NaN	0.536453	0.791105	0.608641	2.06207	1.68895	NaN	0.520741	NaN	NaN	-0.00679016	2.0165	2.04679	NaN	NaN	NaN	0.864291	0.664946	1.84519	0.657784
NaN	1.2577	2.40895	NaN	1.86084	1.62975	1.43828	1.27607	1.80959	NaN	2.15372	NaN	NaN	1.34174	1.10435	0.998003	NaN	1.22432	4.74884	1.23647	1.53756	1.57117	1.46203	1.92245	2.64998	1.76074	NaN	2.35161	NaN	1.59096	1.40405	1.2457	1.76652	NaN	2.10245	NaN	4.63581	1.20704	1.50097	1.53378	1.42724	1.71883	2.56916	NaN	1.73814	1.53393	1.92994	NaN	NaN	1.30574
5.29338	2.92491	3.83244	2.18452	3.30299	2.76876	3.06631	1.73976	2.85198	2.1544	3.06001	2.50351	2.84756	2.7748	2.74695	2.82595	2.93466	2.04671	0.98625	2.69307	2.0361	2.18898	2.21442	3.19667	3.05255	NaN	5.16739	3.74122	2.13252	2.70286	2.99332	1.69836	2.7841	2.10313	2.98718	2.77978	0.962776	2.62897	1.98764	2.13688	2.16171	NaN	4.08732	2.3298	2.9529	3.27024	3.04166	2.29769	3.03694	2.18284
NaN	-0.260456	0.78889	-0.0589786	-0.0835217	0.828124	0.303399	-0.378706	0.275834	-0.247932	0.523239	-0.303031	-0.0192561	0.159287	0.170909	0.43913	0.801524	-0.152848	0.956236	-0.0918525	-0.304863	NaN	0.303083	0.407548	0.706695	0.388485	NaN	0.770113	-0.062678	0.808414	0.296178	-0.402459	0.269269	-0.263483	0.510785	-0.0204639	0.933477	-0.0976138	-0.323985	NaN	0.295869	0.379239	0.841357	-0.0601726	0.8832	0.323577	0.294179	-0.252952	-0.019646	-0.155942
3.06988	0.994407	2.39888	-0.111457	1.62205	1.5995	1.12994	NaN	0.930723	-0.0066355	0.954788	0.256733	NaN	-0.155288	1.39377	1.79262	1.18938	NaN	1.25013	-0.184702	NaN	-0.0812008	1.05057	1.61615	1.81584	2.0276	2.99681	2.34178	-0.118448	1.56143	1.10305	NaN	0.908571	-0.0070517	0.932063	NaN	1.22038	-0.196287	NaN	-0.086294	1.02556	1.97934	2.55842	-0.113713	1.70588	1.20509	0.992623	-0.00676983	NaN	NaN
2.3487	1.02327	NaN	0.199026	1.24205	-0.982139	-0.558377	1.00615	-0.670197	0.979785	0.435902	0.176796	1.10823	0.834223	0.901056	0.130509	0.0567743	0.604167	NaN	0.897137	1.19604	0.54724	-0.251421	-1.0913	1.5774	0.985559	2.2928	NaN	0.194289	-1.04374	-0.5934	0.982207	-0.712234	0.956465	0.425527	1.08185	NaN	0.875784	1.16757	0.534215	-0.267191	0.962102	NaN	0.212263	-1.00202	-0.56968	-0.683764	1.04495	1.18193	0.644348
0.53674	0.708046	NaN	-0.465294	NaN	-2.37474	-3.20814	1.21259	-2.30623	0.156681	NaN	0.189683	0.37926	0.181445	1.05631	-0.374186	-1.34404	0.0457875	NaN	0.757103	0.578536	0.517462	NaN	NaN	1.10644	0.281969	0.523965	NaN	-0.494479	-2.52369	-3.40937	1.18372	-2.45088	0.152951	NaN	0.370233	NaN	0.739083	0.564766	0.505146	NaN	0.275258	NaN	-0.474714	-2.42281	-3.27309	-2.35291	0.167101	0.404483	0.0488327
-2.20512	-1.13738	-2.51563	-0.85736	-0.832145	0.272499	-2.12754	-0.279815	-2.14705	NaN	NaN	NaN	-0.712242	-0.6734	NaN	-2.57038	-1.34503	-0.584767	-1.27912	-0.279037	-0.518226	-0.573418	-2.00346	-2.10504	NaN	NaN	-2.34343	-2.67341	-0.911137	0.266013	-2.26099	-0.297366	-2.28172	NaN	NaN	-0.756916	-1.35935	-0.296539	-0.550731	-0.609384	-2.12913	NaN	-2.56655	-0.874717	0.290622	-2.17061	-2.19052	NaN	-0.726661	-0.596605
-0.465168	-0.0893024	0.298604	0.18002	-0.200839	0.378764	0.117739	-0.412432	0.149829	-0.245458	-0.0748844	-1.46268	0.0626915	-0.107122	-0.266547	0.103239	0.396118	-0.27037	0.367638	-0.184461	-0.576732	0.111788	0.334514	0.34692	-0.238141	-0.115012	-0.494345	0.291497	0.175736	0.369749	0.114937	-0.438301	0.146263	-0.260853	-0.0795813	0.0611993	0.358887	-0.196031	-0.612907	0.109127	0.326552	-0.122226	0.318463	0.191993	0.403954	0.12557	0.159794	-0.250427	0.0668609	-0.275844
NaN	-0.404242	-1.1292	-0.624171	-0.609767	-0.288481	-0.396936	-0.915555	-0.181594	-1.04081	-1.26632	-0.654428	-0.697232	-0.0121051	-0.886826	-0.804551	-0.157644	-1.176	NaN	-0.769518	-0.759814	-0.374746	-0.248685	-0.585951	-0.72337	-0.66932	NaN	-1.20003	-0.663321	-0.306575	-0.421833	-0.972981	-0.192984	-1.10609	-1.34575	-0.740964	NaN	-0.817784	-0.807472	-0.398251	-0.264284	-0.711302	-1.15206	-0.636807	-0.294321	-0.404971	-0.18527	-1.06188	-0.711347	-1.19981
1.12572	0.07996	0.950545	1.23151	0.473166	0.564108	1.03768	-0.463019	0.607648	0.434014	0.79642	0.868266	-0.0133839	-0.0742838	0.789229	0.926149	0.715531	0.549271	1.0704	0.22072	0.813944	0.507117	0.819102	0.73218	0.812764	0.143808	1.09892	0.92792	1.2022	0.550681	1.01298	-0.492061	0.593185	0.423684	0.777465	-0.0142234	1.04493	0.215467	0.794571	0.495047	0.799607	0.140385	1.01376	1.31342	0.601625	1.1067	0.648061	0.462879	-0.0136549	0.585801
NaN	NaN	1.01956	NaN	1.94401	1.32014	-0.29726	-0.511616	0.46045	NaN	1.60738	0.665169	0.0132226	NaN	0.185387	1.15303	0.286385	NaN	1.8835	0.557754	NaN	0.664199	NaN	0.563672	NaN	1.01482	NaN	0.995294	NaN	1.28872	-0.315905	-0.543707	0.449491	NaN	1.56912	0.0129079	1.83867	0.544478	NaN	0.64839	NaN	0.990662	1.08737	NaN	1.40794	-0.303278	0.491073	NaN	0.014102	NaN
NaN	0.521754	1.46956	0.919212	1.65004	1.60962	-0.306346	0.378182	1.47803	0.582703	2.11166	NaN	1.48423	0.77491	0.140911	1.52796	1.10986	NaN	NaN	0.754383	0.984169	0.277941	1.72503	1.77159	NaN	1.14506	NaN	1.43459	0.897333	1.57131	-0.325561	0.369181	1.44285	0.568834	2.0614	1.44891	NaN	0.736428	0.960744	0.271326	1.68397	1.11781	1.5673	0.980346	1.71667	-0.312547	1.57633	0.621457	1.58294	NaN
NaN	0.252526	1.19147	0.597592	1.05698	1.15665	1.41776	-0.369499	0.611552	0.00404647	1.53762	-0.0774736	0.436999	0.0393334	-0.0500556	0.67361	0.751106	0.262338	NaN	0.338935	0.326413	0.217811	0.571909	0.841183	0.266259	1.10167	NaN	1.16311	0.583369	1.12912	1.38401	-0.392675	0.596996	0.00395015	1.50102	0.426598	NaN	0.330868	0.318644	0.212627	0.558297	1.07545	1.27071	0.637336	1.23357	1.51205	0.652224	0.00431558	0.466062	0.279786
0.250451	0.000832355	0.430408	NaN	0.0472913	-0.0271664	-0.0807024	-0.630026	-0.549936	-0.255977	0.00130352	0.0782754	-0.148517	0.0404745	0.155598	0.150791	0.519316	-0.0206749	0.342131	-0.435938	-0.301568	0.041852	-0.0266897	0.798213	-0.50955	0.492364	0.24449	0.420163	NaN	-0.0288703	-0.0857643	-0.669544	-0.58443	-0.272033	0.00127249	-0.157833	0.333988	-0.463281	-0.320483	0.0408558	-0.0283638	0.480645	0.459033	NaN	-0.0277163	-0.0823361	-0.561069	-0.261159	-0.151524	-0.0210934
NaN	0.824899	NaN	NaN	NaN	1.54204	0.635342	0.110227	0.536843	NaN	1.39696	-0.744171	0.148288	NaN	1.11597	1.71387	1.13701	0.272918	NaN	0.250942	0.19938	NaN	1.22736	1.2175	NaN	NaN	NaN	NaN	NaN	1.50534	0.62022	0.107603	0.524065	NaN	1.36371	0.144759	NaN	0.244969	0.194635	NaN	1.19815	NaN	NaN	NaN	1.6446	0.677597	0.572546	NaN	0.15815	0.291068
NaN	-1.95211	-2.48927	-3.72583	-3.11161	-2.86666	-2.98698	-1.76208	-1.22651	-3.42718	-3.04048	-1.91247	-3.23885	-2.6128	-1.58843	-1.13992	NaN	NaN	NaN	-2.79998	-2.82916	NaN	-3.35254	-2.38276	-2.71227	NaN	NaN	-2.6454	-3.95953	-3.04647	-3.17433	-1.8726	-1.30344	-3.64214	-3.23119	-3.442	NaN	-2.9756	-3.00662	NaN	-3.56282	NaN	-2.53966	-3.80126	-2.92469	-3.04745	-1.25134	-3.49656	-3.30442	NaN
NaN	0.316454	1.79815	1.64144	-1.26971	-0.0872343	-1.27103	0.442523	0.813595	0.661374	-1.57884	-1.42457	-0.370173	-0.827284	1.4018	0.246378	NaN	0.521248	-0.66861	-0.306558	0.4556	1.02925	0.945148	-0.460894	0.676101	0.63564	NaN	1.75535	1.60237	-0.092706	-1.35076	0.431991	0.79423	0.645632	-1.67787	-0.393391	-0.710548	-0.325787	0.444756	1.00475	0.922652	0.620511	1.91774	1.7506	-0.0890003	-1.29677	0.867704	0.70536	-0.377667	0.555915
-0.187516	-0.887242	-1.04953	-0.0582502	-0.279791	-0.749037	-1.51883	0.28853	-0.0213047	-0.742154	-0.96642	0.166612	-0.103301	0.228813	-0.532885	-1.18004	-0.237991	-0.247645	0.155037	0.101502	-0.597774	-0.092068	-0.119635	-0.713777	-1.07281	-0.270411	-0.199277	-1.11536	-0.0619038	-0.796019	-1.6141	0.281663	-0.022641	-0.788705	-1.02704	-0.109781	0.151347	0.0990861	-0.635268	-0.0978428	-0.127139	-0.287373	-1.07078	-0.0594294	-0.764201	-1.54958	-0.021736	-0.757179	-0.105393	-0.252658
NaN	-0.981601	-3.11298	-0.0169022	NaN	-2.16285	NaN	-1.86414	-2.54976	-0.886048	-2.81211	-0.543554	-3.42873	-2.72334	-1.38402	-1.22502	NaN	NaN	NaN	-1.8893	-1.38619	NaN	-1.71753	-3.10265	-1.09137	-3.1184	NaN	-3.30823	-0.0179623	-2.29851	NaN	-1.98107	-2.70969	-0.941624	-2.9885	-3.64379	NaN	-2.0078	-1.47313	NaN	-1.82526	-3.314	-3.176	-0.0172443	-2.20663	NaN	-2.60138	-0.903986	-3.49814	NaN
1.05983	-0.49673	-0.423143	0.390739	0.884749	0.0218857	-0.205917	0.664305	0.970378	0.0960415	-0.188599	1.6204	0.656741	1.23303	0.190221	-0.824927	1.27794	0.229007	1.41944	0.540289	0.114075	0.75315	0.395076	0.3862	0.0341874	0.616749	1.03461	-0.449684	0.381439	0.0213648	-0.218833	0.648494	0.947282	0.0937556	-0.200428	0.64111	1.38566	0.527429	0.11136	0.735224	0.385672	0.602069	-0.431709	0.416726	0.0233413	-0.210086	1.03491	0.102429	0.700419	0.244238
-2.47863	-1.03621	-2.40472	-1.02825	-1.52871	-0.87687	-1.73914	-1.20715	-1.74845	-1.35082	-2.09847	-1.17324	-1.61745	-1.7112	-1.40558	-1.5604	-1.80145	-1.52822	-0.441921	-0.937678	-1.57304	-1.32975	-0.925707	-2.35051	-1.86952	-2.12638	-2.6341	-2.55555	-1.09274	-0.93187	-1.84822	-1.28287	-1.85812	-1.43555	-2.23009	-1.7189	-0.46964	-0.996492	-1.6717	-1.41315	-0.983771	-2.25975	-2.4534	-1.04906	-0.894622	-1.77435	-1.78385	-1.37817	-1.65019	-1.55916
NaN	0.620906	0.689027	0.715405	-0.133598	0.123887	NaN	NaN	0.847559	0.428301	NaN	0.287958	0.832064	0.764705	0.987882	NaN	-0.0686842	NaN	NaN	0.489862	0.209811	NaN	0.736662	1.36095	NaN	1.25805	NaN	0.672627	0.698377	0.120938	NaN	NaN	0.827386	0.418107	NaN	0.81226	NaN	0.478203	0.204818	NaN	0.719128	1.22811	0.734852	0.762984	0.132126	NaN	0.903927	0.456786	0.887403	NaN
NaN	1.92641	NaN	1.27707	3.57975	3.10744	NaN	1.90365	1.65493	-0.660661	2.99872	NaN	1.59705	1.03757	2.36205	2.39484	2.44702	0.725049	NaN	1.44297	2.32919	1.4059	1.26557	2.20224	3.49838	2.56404	NaN	NaN	1.24667	3.03348	NaN	1.85834	1.61554	-0.7021	2.92735	1.55904	NaN	1.40863	2.27376	1.37244	1.23545	2.50302	NaN	1.362	3.31411	NaN	1.76499	-0.674035	1.70327	0.77327
NaN	0.172431	NaN	0.782996	0.834819	NaN	NaN	0.712986	-0.0414362	0.384449	-0.878019	1.22325	0.857098	1.02472	-0.118016	-1.0922	0.572108	0.779029	NaN	0.6267	0.451991	0.71566	-0.275567	-0.018421	NaN	0.818497	NaN	NaN	0.76436	NaN	NaN	0.696016	-0.0440352	0.375299	-0.933092	0.836698	NaN	0.611783	0.441233	0.698626	-0.292851	0.799016	NaN	0.835071	NaN	NaN	-0.042275	0.410018	0.914101	0.83084
NaN	-0.132253	-0.138025	-0.236621	-0.0702117	0.577095	-0.0598959	-0.395574	-0.0431039	-0.439646	0.403841	-0.327019	-0.100916	-0.174871	-0.147665	0.333382	0.0301423	-0.259693	-0.947225	-0.364238	-0.169763	-0.295973	0.249384	0.333736	-0.350761	-0.0432554	NaN	-0.146683	-0.251463	0.563359	-0.0636527	-0.420385	-0.0458075	-0.467222	0.394229	-0.107246	-1.00664	-0.387084	-0.180411	-0.314537	0.243448	-0.0459685	-0.14082	-0.241412	0.615476	-0.0611084	-0.0439765	-0.448547	-0.102959	-0.26495
-0.601761	-0.81511	-0.453617	NaN	-0.671737	0.54447	-0.656707	-1.13277	-0.0309853	-0.736168	-0.361449	-0.26073	NaN	-0.431647	-0.824546	-0.373001	-0.260482	-0.865429	-0.00203053	-0.709555	-1.06544	-0.85353	-0.156514	-0.0551019	NaN	-0.63235	-0.639505	-0.482069	NaN	0.531511	-0.697898	-1.20382	-0.0329288	-0.782343	-0.38412	NaN	-0.00215789	-0.75406	-1.13226	-0.907066	-0.166332	-0.672013	-0.4628	NaN	0.580681	-0.670002	-0.0316125	-0.751071	NaN	-0.882948
-0.306704	-0.0791484	-0.181468	NaN	-0.02627	0.212074	-0.301865	-0.473159	-0.323157	-0.511526	0.214013	-0.412729	-0.5294	-0.325743	-0.219745	-0.0734608	0.127962	-0.412887	-0.442209	-0.496909	-0.512181	-0.476139	-0.165014	-0.0357691	-0.290608	-0.270025	-0.325942	-0.192851	NaN	0.207026	-0.320799	-0.502837	-0.343427	-0.543611	0.208919	-0.562606	-0.469945	-0.528077	-0.544306	-0.506004	-0.175364	-0.286962	-0.185142	NaN	0.226178	-0.307976	-0.329699	-0.521882	-0.540118	-0.421246
-0.385585	0.160378	0.0181129	0.820493	0.838609	-0.925876	0.669586	0.878176	0.731328	1.03015	-0.495015	1.03827	1.05079	0.999999	-0.654035	-0.790478	0.0808779	1.09148	1.80547	1.03563	0.939617	1.42171	0.771362	0.45098	0.849868	0.981524	-0.40977	0.0176817	0.800964	-0.983949	0.653649	0.857274	0.713922	1.00563	-0.526064	1.02578	1.76249	1.01098	0.917253	1.38788	0.753003	0.958162	0.0193175	0.875062	-0.944619	0.714118	0.779967	1.09866	1.12067	1.16407
NaN	0.418938	0.258668	0.623055	-0.222959	-0.199236	NaN	0.353528	0.024092	0.102336	-0.0163302	NaN	-0.383284	-0.743703	0.181258	0.798852	NaN	-0.196842	0.0779109	-0.349432	0.413755	NaN	0.403758	0.245623	0.921947	-0.524217	NaN	0.252511	0.608225	-0.211733	NaN	0.345114	0.0235186	0.0999001	-0.0173545	-0.407325	0.0760565	-0.37135	0.403907	NaN	0.394148	-0.557097	0.275871	0.664492	-0.203269	NaN	0.0256943	0.109142	-0.391044	-0.200827
2.30386	-0.737396	NaN	0.897506	NaN	-0.688776	-0.365569	0.987287	1.04327	NaN	-0.272042	0.590131	NaN	0.65281	1.53022	1.07367	0.330601	0.928124	1.93652	1.12743	1.09456	0.930782	NaN	NaN	NaN	NaN	2.24902	NaN	0.876144	-0.731978	-0.388499	0.963788	1.01844	NaN	-0.289105	NaN	1.89043	1.10059	1.06851	0.908628	NaN	NaN	NaN	0.957197	-0.702719	-0.37297	1.11266	NaN	NaN	0.98985
2.70798	0.963572	3.06364	1.84305	0.602278	0.505876	0.013654	0.960201	1.57387	1.37066	0.587021	1.20574	0.714427	0.670749	2.04714	0.795694	1.67673	1.13665	1.29352	1.04208	1.41027	1.61967	0.742631	1.36967	2.60272	2.20397	2.64353	2.99072	1.79919	0.493835	0.013329	0.937346	1.53641	1.33803	0.573049	0.697423	1.26273	1.01727	1.3767	1.58112	0.724955	2.15151	3.26739	1.96563	0.53952	0.014562	1.67854	1.46182	0.761942	1.21225
NaN	0.178977	-0.661817	-0.00665766	0.689538	NaN	-0.26266	0.151061	-0.203452	-0.00179448	-0.992126	0.722693	0.194697	1.16815	-0.183029	-0.404633	0.179206	0.182497	NaN	0.526845	NaN	0.263733	-0.192561	-0.774916	-0.580637	0.207384	NaN	-0.703329	-0.00707525	NaN	-0.279134	0.147466	-0.216213	-0.00190704	-1.05436	0.190063	NaN	0.514305	NaN	0.257456	-0.204639	0.202448	-0.675215	-0.00679244	NaN	-0.267977	-0.207571	-0.00183081	0.207646	0.194635
NaN	0.265803	-1.30429	-0.081653	-0.0433652	-1.758	-0.658051	NaN	-0.445247	0.136594	-0.613061	0.55022	0.420503	0.630795	-0.254891	-0.10122	-0.320425	0.461698	-1.32442	0.774313	0.0680894	0.490747	1.19532	-0.846005	-1.2661	-0.0480381	NaN	-1.3861	-0.0867746	-1.86826	-0.699327	NaN	-0.473175	0.133343	-0.651514	0.410495	-1.40749	0.755883	0.0664688	0.479067	1.16687	-0.0510512	-1.3307	-0.083306	-1.79358	-0.671373	-0.454261	0.145678	0.44847	0.492404
NaN	0.391497	0.651286	-0.36233	0.113884	0.735044	0.751415	-0.385437	-0.0170688	0.132376	1.05066	-0.66168	0.0144528	0.0962306	0.512235	0.737932	0.746829	0.14198	NaN	-0.496252	NaN	NaN	0.118631	0.680714	NaN	0.602692	NaN	0.635785	-0.385056	0.717549	0.733531	-0.409613	-0.0181394	0.129225	1.02565	0.0141088	NaN	-0.527378	NaN	NaN	0.115807	0.588347	0.694602	-0.369665	0.78393	0.80139	-0.0174143	0.14118	0.015414	0.151423
-0.396206	-0.598618	-0.444223	-0.772125	-0.192467	-0.332759	-0.0105642	-0.860815	-1.17945	-0.396351	-0.127168	-1.03896	-0.679031	-0.765428	-0.500908	-0.778921	-1.01931	-0.660441	0.304278	-0.348587	-0.651572	-1.47421	-0.569837	-0.723632	-0.00372915	-0.817929	-0.421058	-0.472086	-0.820555	-0.353631	-0.0112268	-0.914808	-1.25343	-0.421211	-0.135145	-0.721622	0.297036	-0.370451	-0.692441	-1.56668	-0.605579	-0.869232	-0.453215	-0.787756	-0.339496	-0.0107781	-1.20333	-0.404374	-0.692777	-0.673811
-0.0122121	1.32859	-0.215847	NaN	2.47014	-1.0294	1.45917	0.729102	0.342813	1.21494	-0.685783	-0.0494492	1.01751	0.8049	1.08458	0.32905	NaN	0.63488	1.39683	1.1254	NaN	1.31863	0.512055	-0.918791	NaN	NaN	-0.012978	-0.229385	NaN	-1.09397	1.42444	0.711749	0.334654	1.18603	-0.728797	0.993294	1.36358	1.09861	NaN	1.28724	0.499868	NaN	-0.220216	NaN	-1.05024	1.55621	0.365613	1.29575	1.08518	0.677104
-0.774047	-0.612636	-0.365528	NaN	-0.543859	-0.355593	-0.491249	-0.82502	-0.165371	-0.39343	-0.356082	-0.812312	-1.03973	-0.168325	-0.440334	-0.488041	0.141905	-0.674112	NaN	-0.538538	-0.494197	NaN	-0.198622	-0.540722	-0.576012	-1.01064	-0.822598	-0.388455	NaN	-0.377897	-0.522061	-0.876768	-0.175744	-0.418107	-0.378417	-1.10495	NaN	-0.572316	-0.525195	NaN	-0.211081	-1.07403	-0.372927	NaN	-0.362792	-0.501194	-0.168719	-0.401395	-1.06078	-0.687759
-0.428155	0.365135	-1.56313	-2.59686	-2.04992	-1.78562	NaN	0.519356	-3.60278	-1.68573	-0.979833	-1.55914	-0.971138	-0.433077	0.389122	-0.411105	-2.82203	0.0811988	NaN	-0.970476	-0.79404	-1.07696	-3.67884	-2.75707	-0.558968	-2.4004	-0.45501	-1.66118	-2.75974	-1.89762	NaN	0.506994	-3.82876	-1.79146	-1.04129	-1.03205	NaN	-1.03135	-0.843845	-1.14451	-3.90959	-2.55096	-1.59478	-2.64943	-1.82176	NaN	-3.67572	-1.71986	-0.990798	0.0865991
NaN	-0.135757	NaN	-0.454153	-0.178887	-0.385553	NaN	0.035012	-0.348886	-0.14944	-0.28574	-0.536283	-0.348913	-0.0952385	-0.050727	-0.210174	-0.621511	NaN	NaN	-1.25972	-0.471347	NaN	-1.46443	-0.420763	NaN	-0.220749	NaN	NaN	-0.482639	-0.409736	NaN	0.0341787	-0.370769	-0.158814	-0.303662	-0.370798	NaN	-1.33874	-0.500911	NaN	-1.55629	-0.234595	NaN	-0.463347	-0.393358	NaN	-0.355949	-0.152465	-0.355976	NaN
-2.04073	-0.491536	-1.33579	-0.511131	-2.65867	-0.708868	-0.229226	-1.06407	-2.08266	-0.502814	-0.875624	-1.3875	-1.96037	-1.70455	-1.2209	-0.64046	-0.971139	-0.845318	NaN	-1.55937	-0.44052	-1.44335	-0.929426	-0.972146	-0.449059	-2.5515	-2.16873	-1.41958	-0.543191	-0.753331	-0.243604	-1.13081	-2.21329	-0.534352	-0.930546	-2.08333	NaN	-1.65718	-0.46815	-1.53389	-0.987723	-2.71154	-1.36284	-0.521479	-0.723219	-0.233866	-2.12482	-0.512993	-2.00006	-0.862431
NaN	2.48263	1.87842	4.1617	2.22606	0.919171	1.84314	1.38565	3.23822	2.71142	0.399673	3.37024	1.79945	1.30896	1.88276	2.04524	3.94056	2.46428	NaN	1.73265	2.07711	3.11055	3.30886	2.93125	1.12948	1.42333	NaN	1.83371	4.06265	0.897294	1.79927	1.35267	3.16115	2.64689	0.39016	1.75662	NaN	1.69141	2.02767	3.03651	3.2301	1.38945	2.00335	4.43848	0.980303	1.96572	3.45358	2.89175	1.91912	2.62817
NaN	1.76631	2.01162	2.46923	NaN	0.483273	NaN	1.96431	3.22945	2.11031	1.67579	2.19447	1.7611	2.3686	1.63453	NaN	NaN	0.550225	NaN	1.79714	1.43297	2.36425	2.29287	NaN	0.143795	1.74052	NaN	1.96374	2.41046	0.47177	NaN	1.91756	3.15258	2.06008	1.6359	1.71919	NaN	1.75437	1.39886	2.30798	2.23829	1.69909	2.14541	2.63345	0.515414	NaN	3.44423	2.25066	1.87823	0.586818
NaN	0.459436	2.01162	2.58844	0.104112	-0.197955	0.976087	1.96431	0.201422	NaN	-0.725384	2.61365	0.957784	2.34224	1.12757	0.230257	2.50733	2.55326	NaN	2.0664	0.914587	2.36425	3.2056	2.23954	0.714532	NaN	NaN	1.96374	2.52683	-0.210371	0.952854	1.91756	0.196627	NaN	-0.770883	0.934987	NaN	2.01722	0.892819	2.30798	3.12931	NaN	2.14541	2.76059	-0.201962	1.041	0.214817	NaN	1.02148	2.72307
NaN	0.686441	NaN	1.68679	0.873872	-0.883003	NaN	NaN	0.785019	1.11077	-0.723959	2.93635	1.24675	0.552898	0.715579	-0.196929	0.978183	NaN	NaN	0.745638	NaN	NaN	NaN	1.07609	NaN	0.793148	NaN	NaN	1.64664	-0.938388	NaN	NaN	0.766335	1.08434	-0.769368	1.21708	NaN	0.727891	NaN	NaN	NaN	0.77427	NaN	1.79897	-0.900879	NaN	0.837229	1.18465	1.32967	NaN
NaN	1.86255	2.58671	2.10321	1.19777	-0.480544	NaN	1.14885	3.30188	1.61562	-0.300795	2.3611	1.88599	1.44225	1.46016	1.82282	2.82133	1.95883	NaN	1.39986	1.31977	2.11264	3.42714	2.13353	0.226417	1.45788	NaN	2.52514	2.05315	-0.510685	NaN	1.1215	3.22329	1.57716	-0.319662	1.8411	NaN	1.36655	1.28836	2.06236	3.34557	1.42318	2.75875	2.24309	-0.490272	NaN	3.52148	1.72307	2.01142	2.0891
0.520864	0.227112	1.08592	1.88718	0.665071	0.529514	2.31565	0.0272092	3.03408	1.79724	1.29152	3.81985	1.78252	1.928	0.663233	2.03387	2.76278	1.89235	-0.428134	2.03111	1.38286	1.67138	2.75516	3.05417	-0.845903	2.17823	0.508466	1.06007	1.84227	0.516911	2.26053	0.0265616	2.96186	1.75446	1.26078	1.74009	-0.454987	1.98277	1.34995	1.6316	2.68958	2.12639	1.15814	2.01269	0.56473	2.46966	3.23587	1.91677	1.90107	2.01821
1.93149	1.53838	2.0462	2.99285	1.73838	0.262272	3.16467	1.82305	3.11666	2.43922	1.143	3.95931	1.93476	2.76606	2.15658	1.97997	3.80017	2.64527	1.9012	2.52426	2.15091	2.93836	3.56709	2.51262	1.76814	2.2869	1.88552	1.9975	2.92162	0.256029	3.08935	1.77966	3.04248	2.38116	1.11579	1.88871	1.85595	2.46418	2.09972	2.86843	3.48219	2.23247	2.18229	3.1919	0.279715	3.37515	3.32394	2.60144	2.06344	2.8212
NaN	1.1637	1.66337	1.91615	1.05355	-0.230374	0.376318	0.718247	NaN	1.15598	0.0945791	2.96797	1.88179	2.32606	1.36705	1.48378	3.1101	1.77026	NaN	1.65787	0.681708	2.30815	3.75554	1.75358	-0.771281	1.27949	NaN	1.62378	1.87055	-0.244824	0.367361	0.701152	NaN	1.12847	0.0923279	1.83701	NaN	1.61841	0.665482	2.25322	3.66615	1.24904	1.77399	2.04359	-0.235038	0.401346	NaN	1.23286	2.00695	1.888
NaN	3.32055	3.84429	4.1603	2.89243	2.87904	5.88535	2.50178	5.64664	3.44785	3.52439	3.13422	4.36788	4.37499	2.48871	3.74661	5.51318	4.63471	NaN	3.43459	2.88262	3.75158	5.14654	4.81815	NaN	4.10194	NaN	3.75279	4.06128	2.81052	5.74527	2.44223	5.51224	3.36578	3.44051	4.26392	NaN	3.35284	2.81401	3.66229	5.02405	4.00431	4.09996	4.43699	3.07052	6.27676	6.02218	3.67715	4.65838	4.94295
NaN	1.55936	1.20432	2.26843	1.17447	0.236518	2.19133	1.56582	2.40944	1.62109	0.794841	2.98166	2.27367	2.88747	1.48155	1.52718	2.52864	2.24529	1.60716	2.18407	1.4799	2.07228	3.26163	1.74831	0.394502	1.55816	NaN	1.17566	2.21444	0.230889	2.13918	1.52855	2.35209	1.5825	0.775923	2.21955	1.56891	2.13208	1.44467	2.02296	3.184	1.52108	1.28442	2.4193	0.252249	2.33707	2.56968	1.7289	2.42488	2.39462
NaN	2.75169	NaN	3.27985	2.19985	NaN	NaN	NaN	1.80611	NaN	2.53613	3.3407	3.79542	3.95903	0.833266	1.717	NaN	2.87184	NaN	3.1949	NaN	2.79765	3.32572	4.17952	NaN	NaN	NaN	NaN	3.20179	NaN	NaN	NaN	1.76312	NaN	2.47577	3.70508	NaN	3.11886	NaN	2.73106	3.24656	NaN	NaN	3.49798	NaN	NaN	1.92623	NaN	4.04784	3.06284
NaN	1.24351	1.05223	NaN	1.79924	NaN	NaN	1.25725	2.25266	1.98471	0.797867	3.10633	1.54845	1.89638	2.03586	0.981331	2.4401	2.09537	NaN	2.09195	1.71811	2.3437	1.70314	1.55401	-0.755881	0.746281	NaN	1.02719	NaN	NaN	NaN	1.22732	2.19905	1.93747	0.778877	1.51159	NaN	2.04216	1.67722	2.28792	1.66261	0.728519	1.12221	NaN	NaN	NaN	2.40248	2.11671	1.65143	2.23473
NaN	1.76521	NaN	1.78312	1.77603	1.82706	4.47903	1.92781	3.83475	1.44782	2.11298	2.00923	3.49116	4.01272	1.64867	2.3591	3.63438	2.58322	0.772716	2.18443	1.09884	2.33264	3.35862	3.12279	1.21414	3.12451	NaN	NaN	1.74068	1.78358	4.37242	1.88192	3.74348	1.41336	2.06269	3.40807	0.754324	2.13244	1.07269	2.27712	3.27868	3.05014	NaN	1.90171	1.94857	4.77691	4.08979	1.54411	3.72335	2.75502
3.48508	2.15771	NaN	0.637313	0.280949	NaN	NaN	2.03491	1.86546	NaN	NaN	NaN	2.17378	3.14888	1.70303	NaN	1.44652	1.83031	NaN	NaN	NaN	2.02615	NaN	1.62846	NaN	NaN	3.40213	NaN	0.622144	NaN	NaN	1.98648	1.82106	NaN	NaN	2.12204	NaN	NaN	NaN	1.97793	NaN	NaN	NaN	0.679699	NaN	NaN	1.98953	NaN	2.31835	1.95204
0.419259	2.01831	1.57568	3.45628	1.50246	-0.0941264	NaN	0.604675	2.46649	2.29441	-0.188159	3.35176	1.07603	0.57513	1.6107	1.01818	3.36083	1.87595	NaN	1.67285	2.56749	2.12726	3.58461	2.29951	NaN	NaN	0.40928	1.53818	3.37402	-0.10003	NaN	0.590282	2.40778	2.2398	-0.199961	1.05042	NaN	1.63303	2.50638	2.07663	3.49929	NaN	1.68048	3.68615	-0.0960319	NaN	2.63053	2.447	1.14759	2.00072
1.66596	2.01258	0.512874	3.06252	1.2342	-0.654575	1.68324	1.31783	2.16769	2.30326	0.0435903	3.58437	1.4573	1.14054	2.08111	0.580849	3.40342	2.55618	1.2701	2.1568	2.07582	2.63586	2.63624	2.08749	0.779492	0.578382	1.62631	0.500667	2.98963	-0.695632	1.64318	1.28646	2.1161	2.24844	0.0425528	1.42261	1.23987	2.10547	2.02642	2.57313	2.5735	0.564616	0.546984	3.2662	-0.667827	1.79519	2.31186	2.45645	1.55422	2.72619
NaN	2.51935	3.50933	3.19555	1.78055	0.505329	0.835931	2.14659	4.24525	2.406	1.18788	3.47019	2.9647	2.59044	2.78208	2.60987	5.01749	3.07808	NaN	2.56179	2.20975	3.22255	3.78065	2.31996	1.70367	2.71936	NaN	3.4258	3.11949	0.493301	0.816035	2.0955	4.14421	2.34873	1.15961	2.89414	NaN	2.50081	2.15716	3.14585	3.69067	2.65464	3.74273	3.40808	0.538937	0.891526	4.52759	2.56601	3.16187	3.2828
NaN	2.91672	4.05795	4.99775	2.36492	2.37591	1.97428	3.36698	3.66509	2.17279	NaN	4.16342	2.26135	2.22256	3.42702	-0.0679277	6.46197	3.99644	NaN	2.13953	2.34072	NaN	5.23082	2.00392	2.92634	3.62139	NaN	3.96136	4.87879	2.31936	1.92729	3.28684	3.57786	2.12108	NaN	2.20753	NaN	2.08861	2.28501	NaN	5.10632	3.5352	4.32783	5.33013	2.53393	2.10559	3.90885	2.3173	2.41175	4.26223
-1.83037	1.04884	-0.846927	2.47731	-0.0314396	-1.52296	0.619736	-0.298455	-1.21106	1.49332	-0.782812	2.29101	-1.00962	-0.472679	1.19795	-0.960567	1.78411	0.96658	0.552475	1.21601	1.88673	0.902344	-1.02827	0.449968	1.58249	-1.30167	-1.94518	-0.900049	2.41835	-1.61849	0.604985	-0.317175	-1.28702	1.45778	-0.831913	-1.07295	0.539325	1.18707	1.84182	0.880867	-1.09277	-1.38332	-0.864073	2.64207	-1.55379	0.660953	-1.23558	1.59264	-1.03006	1.03086
NaN	1.37057	1.3046	1.96736	1.52917	NaN	2.41586	0.67633	1.77742	1.76077	0.116593	-1.21032	1.70392	0.661665	1.11773	1.78348	1.81748	NaN	NaN	NaN	1.1849	1.71941	2.6303	0.486238	NaN	0.96083	NaN	1.27355	1.92054	NaN	2.35836	0.660233	1.73511	1.71886	0.113818	1.66337	NaN	NaN	1.1567	1.67848	2.5677	0.937961	1.39137	2.0982	NaN	2.57654	1.89563	1.87788	1.81724	NaN
NaN	NaN	-1.42267	-1.39379	-0.63607	-0.135545	-1.21884	-0.505221	-0.587645	-0.977442	NaN	-1.05483	-1.84791	-0.67744	-2.01736	-0.612896	-0.729303	NaN	NaN	-0.915391	NaN	-1.63175	-0.292395	-0.691841	NaN	-1.20625	NaN	-1.5119	-1.48121	-0.144047	-1.29529	-0.53691	-0.624504	-1.03875	NaN	-1.96381	NaN	-0.972808	NaN	-1.7341	-0.310735	-1.28191	-1.45147	-1.422	-0.138289	-1.24351	-0.599541	-0.99723	-1.88532	NaN
NaN	0.379345	1.34362	NaN	NaN	0.796308	NaN	0.422937	1.13665	0.99308	-0.36974	NaN	0.317099	-0.495001	1.14082	1.06771	-0.0186851	NaN	NaN	NaN	NaN	NaN	1.84583	0.383184	NaN	-0.0804949	NaN	1.31164	NaN	0.777355	NaN	0.41287	1.1096	0.969443	-0.392931	0.309552	NaN	NaN	NaN	NaN	1.8019	-0.0855438	1.43298	NaN	0.849268	NaN	1.21225	1.05913	0.338188	NaN
NaN	0.378391	1.15258	1.731	0.548754	NaN	2.59835	2.53894	0.359733	1.78331	0.184043	-0.905385	0.705896	3.51387	0.35488	1.98245	1.01778	0.754025	NaN	2.57785	2.82333	1.52275	1.38876	1.57661	1.75964	1.34776	NaN	1.12515	1.6898	NaN	2.5365	2.47851	0.351171	1.74086	0.179662	0.689095	NaN	2.5165	2.75613	1.48651	1.35571	1.31568	1.22924	1.84612	NaN	2.77116	0.383658	1.90191	0.752844	0.804173
NaN	2.80404	2.08444	3.46703	1.8965	1.96685	4.60226	2.86273	3.77739	3.13147	2.9227	3.01099	3.53036	4.18736	3.12414	3.18661	5.06407	3.40178	3.1896	3.18317	2.77887	3.2751	4.37557	3.78804	2.47089	3.35866	NaN	2.03483	3.38451	1.92004	4.49272	2.7946	3.68748	3.05693	2.85313	3.44633	3.11368	3.10741	2.71273	3.19715	4.27143	3.27872	2.22307	3.69761	2.09766	4.90834	4.02861	3.33973	3.76516	3.62802
NaN	3.55982	2.36885	3.22993	2.45091	1.29876	4.01827	NaN	3.86685	3.24576	3.46274	3.08014	3.67397	4.42933	3.78435	3.6194	5.62358	2.96685	2.26775	3.02999	2.8853	3.09796	4.26548	3.56857	NaN	3.43259	NaN	2.31246	3.15305	1.26784	3.92263	NaN	3.77481	3.1685	3.38032	3.58653	2.21377	2.95787	2.81663	3.02423	4.16395	3.35089	2.52639	3.44474	1.38513	4.28551	4.12402	3.46162	3.91832	3.16416
NaN	-0.0902165	0.0770939	-0.487906	0.248372	0.520154	0.580665	-0.418582	NaN	NaN	0.772138	-0.171179	NaN	NaN	NaN	0.0217438	-0.0616841	-0.511334	0.825735	NaN	-0.49282	-0.217112	0.44482	0.00500659	NaN	NaN	NaN	0.075259	-0.518509	0.507774	0.566845	-0.444837	NaN	NaN	0.75376	NaN	0.806081	NaN	-0.523732	-0.23073	0.434233	NaN	0.0822212	-0.497784	0.554748	0.619284	NaN	NaN	NaN	-0.521686
NaN	-0.389625	-0.490483	-0.583835	-0.378873	-0.598338	-0.461157	-0.372257	-0.132372	-0.785444	-0.639385	-0.487192	-0.324263	-0.534102	-0.544348	-0.399178	-0.440775	-0.649857	NaN	-0.743984	NaN	NaN	-0.370222	-0.404474	NaN	-0.757961	NaN	-0.521247	-0.620455	-0.635868	-0.490082	-0.395606	-0.140674	-0.834709	-0.679489	-0.344601	NaN	-0.790649	NaN	NaN	-0.393443	-0.805503	-0.500412	-0.595654	-0.610451	-0.470492	-0.135051	-0.801345	-0.330827	-0.663013
-0.805495	-0.26018	-0.0709927	-1.14425	0.425975	0.917744	-0.0491063	-1.29551	-0.00273197	-1.10545	0.477613	-0.45506	-0.638868	-0.564368	0.332696	0.379295	-0.498209	-1.1803	NaN	-0.769442	-0.71143	-1.15206	0.00365152	0.0857679	-0.390875	-0.170707	-0.856018	-0.0754456	-1.21602	0.8959	-0.0521864	-1.37676	-0.00290333	-1.17479	0.466245	-0.67894	NaN	-0.817704	-0.756053	-1.22432	0.0035646	-0.181414	-0.0724299	-1.16741	0.97878	-0.0501004	-0.00278728	-1.12783	-0.651801	-1.2042
NaN	-2.92204	-3.16702	NaN	NaN	-2.00577	-3.27508	-4.52734	NaN	NaN	-2.55972	-1.67278	NaN	NaN	-1.42174	-0.996497	-3.01484	NaN	-1.90588	-2.20708	-3.93067	NaN	NaN	-2.34108	NaN	-2.58381	NaN	-3.36567	NaN	-2.13158	-3.4805	-4.81131	NaN	NaN	-2.72027	NaN	-2.02542	-2.34552	-4.17722	NaN	NaN	-2.74587	-3.23114	NaN	-2.04638	-3.34138	NaN	NaN	NaN	NaN
NaN	-0.0981095	0.670758	-0.432948	0.769919	0.941823	0.569352	-1.34315	0.578703	-0.762724	0.752181	0.214806	0.0844702	-0.16404	0.252937	0.666937	-0.0204842	-0.52868	0.00647553	-0.129616	-0.235318	-0.489575	0.330523	0.655167	0.457365	0.484616	NaN	0.654793	-0.460103	0.919406	0.555801	-1.42739	0.564929	-0.810564	0.734278	0.0824597	0.00632141	-0.137746	-0.250078	-0.520283	0.322656	0.473081	0.715368	-0.441712	1.00446	0.607218	0.617191	-0.778165	0.0900881	-0.539382
NaN	0.426278	1.58482	NaN	1.2628	NaN	1.63572	0.288655	1.27981	NaN	1.2103	0.504822	0.717964	1.07192	1.00636	1.35196	1.01587	0.203335	NaN	0.754723	NaN	NaN	0.782922	1.20757	NaN	1.46115	NaN	1.5471	NaN	NaN	1.59679	0.281785	1.24935	NaN	1.18149	0.700876	NaN	0.736759	NaN	NaN	0.764288	1.42637	1.69022	NaN	NaN	1.74451	1.36493	NaN	0.765714	0.216858
NaN	NaN	0.926863	-0.774234	1.51606	NaN	0.415792	-0.841675	0.849714	-0.63378	1.21749	-0.161713	0.136618	NaN	0.748571	0.695113	0.668056	NaN	0.253377	-0.181806	-0.133517	NaN	0.424815	0.844178	NaN	0.800756	NaN	0.904803	-0.822796	NaN	0.405896	-0.894467	0.829489	-0.673533	1.18852	0.133366	0.247346	-0.19321	-0.141892	NaN	0.414703	0.781697	0.988506	-0.789907	NaN	0.443445	0.906226	-0.64661	0.145704	NaN
-2.30774	-2.11673	-1.89619	NaN	-1.86187	-0.966482	-2.47044	-2.34853	-1.42424	-2.58387	-1.54698	-2.31601	-2.60365	-1.58418	-1.97836	-1.44555	-1.40296	-2.30817	-2.08537	-2.1722	-2.78841	-2.39037	-1.81892	-2.04214	-2.50717	-2.42962	-2.45249	-2.01512	NaN	-1.0271	-2.62539	-2.49584	-1.51357	-2.74593	-1.64401	-2.76695	-2.21618	-2.30845	-2.9633	-2.5403	-1.93301	-2.58201	-1.93458	NaN	-0.986048	-2.52045	-1.45307	-2.63617	-2.65635	-2.3549
NaN	-0.0561917	0.5557	0.6674	0.395125	0.85109	0.797618	-0.137725	0.825358	0.200111	1.50813	-0.485962	0.341293	0.0553792	0.316226	0.326419	0.8704	NaN	NaN	0.663991	0.252273	0.23532	1.16724	0.655475	-0.264595	0.386233	NaN	0.542474	0.651515	0.830833	0.778634	-0.146363	0.805713	0.195348	1.47223	0.33317	NaN	0.648187	0.246269	0.229719	1.13946	0.37704	0.592658	0.711787	0.907694	0.850665	0.88025	0.21342	0.363992	NaN
NaN	0.56963	NaN	NaN	0.774843	1.03024	1.05905	0.398359	1.18082	0.799016	1.42008	1.08257	0.758549	0.329374	0.719837	0.728275	1.18742	1.33983	NaN	0.565902	1.01701	0.661674	1.05579	1.20813	0.975856	1.40116	NaN	NaN	NaN	1.00572	1.03384	0.388878	1.15271	0.779999	1.38628	0.740495	NaN	0.552433	0.992807	0.645926	1.03066	1.36781	NaN	NaN	1.09876	1.12948	1.25935	0.852156	0.808998	1.42894
NaN	-0.160189	0.421416	0.108156	0.231902	-0.469716	-0.903166	-0.0314465	-0.383595	-0.024925	0.463498	0.330004	0.305098	-0.625705	0.450506	-0.962587	-0.282749	0.248257	0.293846	0.243581	0.297418	NaN	0.0947658	0.458243	-0.282239	0.471233	NaN	0.411386	0.105582	-0.499178	-0.959816	-0.033419	-0.407655	-0.0264884	0.452466	0.297836	0.286852	0.237784	0.290339	NaN	0.0925102	0.460017	0.449443	0.11535	-0.479225	-0.92145	-0.391361	-0.0254296	0.325389	0.264768
-0.0937831	0.656859	-0.515325	2.03877	0.0321675	-0.954969	NaN	1.1624	-0.223488	1.06894	0.655115	0.727176	0.928065	1.494	0.884324	0.0924384	1.48096	0.668309	-0.460878	1.23601	1.0221	1.2781	0.480666	-0.650726	0.0939748	0.356224	-0.0996655	-0.547647	1.99024	-1.01487	NaN	1.13474	-0.237506	1.0435	0.639522	0.905976	-0.489786	1.20659	0.997769	1.24768	0.469225	0.347745	-0.525757	2.17436	-0.974302	NaN	-0.228012	1.14003	0.989788	0.712757
0.00287739	0.0311422	-0.203743	-0.310268	0.0648269	0.501717	0.278324	-0.450705	0.134062	-0.109173	0.159546	-0.278994	-0.00516416	-0.163754	-0.24702	-0.11309	0.089895	-0.237967	0.45863	-0.184582	-0.34946	-0.0996614	0.262279	-0.0482051	0.101742	0.249122	0.00280891	-0.216523	-0.329729	0.489775	0.2717	-0.478974	0.130871	-0.116021	0.155748	-0.00548807	0.447714	-0.196159	-0.37138	-0.105913	0.256036	0.243193	-0.207868	-0.316549	0.535084	0.296835	0.142978	-0.111384	-0.00526871	-0.242784
NaN	-2.66092	-4.01104	-3.54228	-2.65132	-3.16735	-2.7874	-2.10807	-3.61508	-3.79169	-3.15156	-1.18235	-2.52734	-2.22261	-3.32316	NaN	-3.22288	-3.17172	-2.91769	-2.90547	-3.04723	-2.52721	-4.15055	-3.71062	-2.84666	-2.90379	NaN	-4.26263	-3.76446	-3.36601	-2.96223	-2.2403	-3.84183	-4.02952	-3.34924	-2.68586	-3.1007	-3.08771	-3.23836	-2.68572	-4.41089	-3.08592	-4.09224	-3.61399	-3.23147	-2.84383	-3.68827	-3.86845	-2.5785	-3.23593
NaN	0.317413	-1.38051	-0.60328	-1.14081	NaN	-0.156344	0.107124	NaN	0.294322	-0.0730747	0.111511	0.46065	0.103803	NaN	-0.759924	NaN	0.551525	NaN	0.29704	-0.273289	0.263074	-1.28291	-1.58733	NaN	NaN	NaN	-1.4671	-0.64112	NaN	-0.166151	0.104574	NaN	0.287316	-0.0776582	0.449686	NaN	0.28997	-0.29043	0.256812	-1.36338	NaN	-1.40846	-0.615493	NaN	-0.159509	NaN	0.313896	0.491286	0.588205
NaN	0.447053	-1.34344	0.179177	-1.35705	NaN	NaN	0.0921758	-0.939534	0.864144	-0.80706	0.126292	-0.312078	0.276512	-0.984389	-0.831937	NaN	1.28559	-0.402103	0.0510563	0.999735	NaN	-1.11831	-1.06429	-0.48675	-0.43213	NaN	-1.4277	0.174912	NaN	NaN	0.0899819	-0.998465	0.843576	-0.857681	-0.331652	-0.427324	0.0498411	0.97594	NaN	-1.18845	-0.459235	-1.37064	0.191093	NaN	NaN	-0.958554	0.921616	-0.318396	1.37109
NaN	1.22543	1.09615	0.699341	0.271602	0.840955	1.58589	0.28307	0.428825	1.24067	0.505195	-0.807162	-0.438492	-0.165041	0.933486	0.97902	0.537943	0.424639	1.23263	0.0596496	1.05237	-0.128943	0.962744	0.322752	1.96494	-0.806399	NaN	1.07006	0.682695	0.82094	1.54814	0.276333	0.418619	1.21114	0.49317	-0.465996	1.20329	0.0582299	1.02732	-0.137031	0.93983	-0.856979	1.16905	0.745852	0.896885	1.69136	0.457345	1.32318	-0.447369	0.45288
NaN	-0.401607	0.376635	NaN	NaN	1.77522	0.384425	-0.438273	NaN	-0.151314	1.03768	-0.30196	-0.263413	-0.67168	NaN	NaN	-0.043366	-0.794253	0.610593	-0.454816	0.147338	-0.821755	-0.803419	NaN	1.05737	-0.0534782	NaN	0.367671	NaN	1.73297	0.375275	-0.465763	NaN	-0.160805	1.01298	-0.279935	0.59606	-0.483343	0.143832	-0.873298	-0.853812	-0.0568325	0.401684	NaN	1.89329	0.409992	NaN	-0.154377	-0.268745	-0.810332
NaN	-0.553715	-0.187567	NaN	-0.841799	-0.154952	NaN	-0.0493638	-0.104963	-0.163941	-0.436125	0.202587	NaN	-0.0597367	-0.567037	-0.776882	NaN	0.302794	NaN	0.0360701	0.158919	0.16193	-0.189955	0.396196	NaN	0.37928	NaN	-0.199332	NaN	-0.164672	NaN	-0.0524601	-0.111546	-0.174224	-0.46348	NaN	NaN	0.0352116	0.155137	0.158075	-0.201869	0.370253	-0.191364	NaN	-0.158089	NaN	-0.107087	-0.16726	NaN	0.322932
NaN	-0.859805	-0.441942	-0.818946	-0.521881	-0.108924	-0.638512	-1.43438	-0.481065	-0.837309	-0.529884	-1.02608	-0.800606	-0.553544	-0.487886	-0.404749	-0.620347	-0.813951	-0.675919	-0.971503	-1.10988	-0.711191	-0.75141	-0.658834	-0.659237	-0.738218	NaN	-0.469662	-0.870313	-0.115756	-0.678561	-1.52435	-0.511239	-0.889827	-0.56312	-0.850822	-0.718315	-1.03244	-1.1795	-0.755799	-0.798541	-0.784521	-0.450889	-0.835525	-0.111129	-0.651438	-0.490804	-0.854259	-0.816813	-0.830429
NaN	-0.437719	0.368756	-0.164979	0.0319117	0.9966	-0.189952	-0.956976	NaN	-0.115557	0.0179209	-0.10319	-0.118516	-0.291388	-0.200297	1.07613	0.515533	-0.279564	NaN	-0.6884	-0.518746	-0.231101	NaN	0.740454	-0.352949	-0.0105926	NaN	0.35998	-0.175327	0.97288	-0.201866	-1.017	NaN	-0.122805	0.0174944	-0.12595	NaN	-0.731578	-0.551284	-0.245597	NaN	-0.011257	0.393281	-0.168319	1.06288	-0.193797	NaN	-0.117896	-0.120916	-0.285223
NaN	-1.33831	-0.573223	-1.27867	-0.796181	-0.0897614	-0.332277	NaN	-1.00614	-1.08027	-0.521762	-0.541178	-1.15405	-0.787305	-0.950618	-0.452008	-0.359465	-1.55425	-0.640361	-0.57539	-1.12757	-1.43913	-0.341575	-0.765399	-0.396083	-0.602019	NaN	-0.609177	-1.35887	-0.0953915	-0.353118	NaN	-1.06925	-1.14803	-0.554489	-1.22644	-0.680526	-0.61148	-1.1983	-1.5294	-0.362999	-0.639779	-0.584827	-1.30455	-0.0915786	-0.339003	-1.02651	-1.10214	-1.17741	-1.58572
NaN	-0.471897	-0.231344	-0.701494	0.00913248	0.262799	-0.178843	-0.870822	-0.770539	-1.12568	0.0181151	-0.707628	-0.758058	-0.7194	-0.40327	-0.633202	-1.33582	-1.23729	-0.504816	-0.320041	-0.651667	-0.897297	-0.716271	-1.76648	0.284725	-0.196011	NaN	-0.245854	-0.745493	0.256544	-0.19006	-0.925443	-0.81887	-1.19628	0.0176839	-0.805605	-0.53648	-0.340115	-0.692541	-0.953578	-0.761197	-0.208306	-0.236027	-0.715695	0.280277	-0.182463	-0.786138	-1.14847	-0.773404	-1.26233
0.411112	1.14327	2.24128	1.01242	1.24899	0.589454	1.26889	0.0785146	1.03169	0.951866	0.417671	-0.837159	0.655169	-0.416306	1.18442	2.00463	0.704607	0.0977213	0.545358	0.705427	0.835698	0.883032	1.46795	0.628497	1.97316	1.47352	0.401327	2.18794	0.988322	0.575424	1.23869	0.0766458	1.00713	0.92921	0.40773	0.639575	0.532378	0.688637	0.815807	0.862015	1.43301	1.43845	2.39034	1.07975	0.628657	1.35328	1.1003	1.01517	0.698742	0.10422
NaN	-1.05656	-1.13709	-1.17563	-0.884552	-0.343298	-0.991974	NaN	-0.720412	-0.960974	-1.06846	-0.670487	-0.999024	-0.687592	-0.932779	-0.97788	-1.01836	-0.836631	-1.02914	-1.07898	-1.30682	-1.00342	-0.940884	-1.12909	NaN	-0.878993	NaN	-1.20841	-1.24937	-0.364831	-1.05419	NaN	-0.765599	-1.02125	-1.13548	-1.06169	-1.0937	-1.14666	-1.38878	-1.06635	-0.9999	-0.934127	-1.16011	-1.19943	-0.350248	-1.01206	-0.734996	-0.980428	-1.01925	-0.853568
NaN	0.490808	1.34669	0.795211	0.000704122	0.473178	1.28092	-0.207646	0.192555	0.653844	0.698632	0.372774	-0.215786	0.276604	0.26746	-0.546381	0.885699	0.457635	NaN	0.596927	0.480875	NaN	0.551413	-0.0101283	NaN	0.181897	NaN	1.31463	0.776284	0.461916	1.25044	-0.22067	0.187972	0.638282	0.682003	-0.229321	NaN	0.582719	0.469429	NaN	0.538288	0.177567	1.43625	0.848098	0.504648	1.36611	0.205361	0.69733	-0.220154	0.488071
NaN	-0.00340241	0.746875	0.214731	1.26761	2.08662	1.40936	0.069399	0.63755	0.11023	1.51639	-0.0148438	0.306937	0.0957911	0.832515	0.961413	NaN	0.120378	0.0231102	0.0380454	0.302846	0.352614	0.709772	NaN	1.34143	NaN	NaN	0.729098	0.20962	2.03696	1.37582	0.0677472	0.622376	0.107607	1.4803	0.299632	0.0225602	0.0371398	0.295638	0.344221	0.692878	NaN	0.796547	0.229012	2.2254	1.50309	0.679952	0.117561	0.327351	0.128384
NaN	-0.527978	0.663487	-0.524741	0.725507	-0.40109	NaN	NaN	NaN	-0.334522	0.388777	1.2269	-0.0255836	0.275456	0.472591	1.01315	0.170197	0.919503	NaN	-0.0207678	-0.410772	NaN	1.14726	0.659107	NaN	NaN	NaN	0.647695	-0.557655	-0.426248	NaN	NaN	NaN	-0.355504	0.379523	-0.0271883	NaN	-0.0220704	-0.436537	NaN	1.11995	NaN	0.707613	-0.535364	-0.40921	NaN	NaN	-0.341294	-0.0261015	0.980657
-0.132617	-0.696137	-0.348895	-0.286665	-0.176534	0.400676	0.0923736	-0.439079	-0.189846	-0.468944	-0.140044	-0.301041	-0.473707	-0.183507	-0.325772	-0.260007	-0.00750026	-0.545475	-0.223875	-0.299762	-0.428455	-0.242793	-0.15001	-0.0542123	-0.411137	0.080518	-0.140935	-0.370778	-0.304645	0.391139	0.090175	-0.466619	-0.201754	-0.498358	-0.148828	-0.50342	-0.237917	-0.318564	-0.455329	-0.258022	-0.159419	0.0786016	-0.355958	-0.292468	0.427324	0.0985171	-0.19369	-0.478438	-0.483297	-0.556517
-0.415717	-0.765394	-0.628844	NaN	-0.534043	0.0188985	-0.435538	-0.62349	-0.390414	-0.60175	-0.508758	-0.162414	-0.511051	-0.511015	-0.746201	-0.516234	-0.0424373	-0.136132	1.49118	-1.21766	-0.822035	-0.706865	-0.425902	-0.183862	-0.555452	-0.876535	-0.441792	-0.668287	NaN	0.0184487	-0.462856	-0.662597	-0.414902	-0.639493	-0.540669	-0.543106	1.45569	-1.29403	-0.873595	-0.751201	-0.452616	-0.931514	-0.641574	NaN	0.0201554	-0.444355	-0.398318	-0.613931	-0.521397	-0.138888
-0.415717	-0.765394	-0.746191	NaN	-0.534043	0.090303	-0.362225	-0.493399	-0.443843	-0.43942	-0.536708	-0.919259	NaN	-0.511015	-0.640401	-0.473232	-0.0239436	-0.136132	1.49118	-1.1878	-0.78119	-0.367058	-0.342131	-0.21653	-0.605938	-0.843758	-0.441792	-0.792994	NaN	0.0881537	-0.384944	-0.524347	-0.471682	-0.466982	-0.570372	NaN	1.45569	-1.2623	-0.830189	-0.390081	-0.363591	-0.896681	-0.761297	NaN	0.0963088	-0.369557	-0.452828	-0.448316	NaN	-0.138888
-0.293315	-0.473573	-0.336318	-0.117392	-0.124064	0.0261397	0.108739	-0.34148	-0.250225	-0.163858	-0.0944985	-0.326416	-0.288003	-0.168325	-0.203657	-0.119528	0.064112	-0.241874	0.326147	-0.133728	-0.315063	-0.0579296	0.0565718	-0.136789	-0.275742	0.0485198	-0.311712	-0.357413	-0.124755	0.0255175	0.106151	-0.362899	-0.26592	-0.174135	-0.100426	-0.306067	0.318384	-0.142116	-0.334825	-0.0615631	0.0552253	0.0473649	-0.343126	-0.119769	0.0278782	0.115971	-0.255291	-0.167175	-0.293833	-0.246771
-1.40158	-1.5373	-1.70757	-2.18354	-2.05507	-0.765237	-1.84041	-1.63821	-0.907392	-2.21249	-1.14366	-1.65745	-2.07501	-1.68558	-1.43454	-1.12369	-1.54018	-2.39569	-0.96	-2.0603	-2.10932	-2.24903	-1.1185	-1.44905	-1.77648	-1.8099	-1.4895	-1.81467	-2.3205	-0.813235	-1.95585	-1.74097	-0.964306	-2.35127	-1.21539	-2.20516	-1.02021	-2.18953	-2.24162	-2.39009	-1.18865	-1.92342	-1.74214	-2.22775	-0.780729	-1.87767	-0.925761	-2.25728	-2.11702	-2.44418
NaN	NaN	0.890645	NaN	-0.589148	-0.0211434	-0.556386	-0.622529	-0.145661	NaN	-0.292936	-1.224	NaN	NaN	-0.924373	-0.373475	-0.198966	NaN	-0.0845139	NaN	-0.954474	-0.87413	-0.395935	-0.366806	NaN	NaN	NaN	0.869446	NaN	-0.0224696	-0.591284	-0.661576	-0.154798	NaN	-0.31131	NaN	-0.0898149	NaN	-1.01434	-0.928958	-0.42077	NaN	0.949879	NaN	-0.0215714	-0.567649	-0.14861	NaN	NaN	NaN
NaN	-0.945619	-0.514832	-1.30285	-0.532148	-0.124073	-0.866996	-0.884261	-0.412597	-1.38437	-0.118587	-0.861523	-0.80343	-0.684684	-0.851303	0.110911	-0.0330888	-1.06797	-1.28524	-1.21391	-1.17081	NaN	-0.511211	-0.115525	-1.5059	-1.09209	NaN	-0.547124	-1.38457	-0.131855	-0.921377	-0.939725	-0.438476	-1.47121	-0.126025	-0.853824	-1.36585	-1.29005	-1.24425	NaN	-0.543276	-1.16059	-0.525254	-1.32923	-0.126584	-0.884548	-0.420949	-1.4124	-0.819695	-1.08959
0.89142	0.192287	0.480725	-0.443023	0.0362505	0.743098	0.239084	0.0878874	-0.13802	-0.0969272	0.168025	-0.422847	-0.0543106	-0.292568	-0.137182	-0.0189047	-0.355154	-0.788304	0.290226	-0.274671	-0.379313	-0.547395	0.513202	-0.00418097	0.108421	-0.21179	0.870203	0.469283	-0.47081	0.725411	0.233394	0.0857956	-0.146677	-0.103007	0.164025	-0.0577171	0.283318	-0.291899	-0.403105	-0.581729	0.500987	-0.225074	0.512697	-0.451991	0.79252	0.254985	-0.140814	-0.0988894	-0.05541	-0.804262
NaN	-0.317497	0.777452	-0.0230683	NaN	NaN	0.914793	0.147629	0.142773	NaN	0.59384	0.165693	NaN	0.146827	-0.415815	0.247031	NaN	-0.191175	0.279256	-0.550014	-0.223585	-0.212004	0.572679	0.435934	0.188674	0.0658896	NaN	0.758948	-0.0245152	NaN	0.893019	0.144116	0.139375	NaN	0.579706	NaN	0.27261	-0.584512	-0.237609	-0.225302	0.559049	0.0643213	0.829158	-0.0235353	NaN	0.975633	0.152268	NaN	NaN	-0.195045
-1.32535	-1.39174	-1.02103	-1.73915	-1.60536	-0.48929	-1.4198	-1.50299	-0.812194	-1.92894	-0.975417	-1.52844	-1.90293	-1.4151	-1.36307	-1.01965	-1.17063	-2.03145	-0.875901	-1.92095	-2.01314	-2.10189	-1.07199	-1.20226	-1.58736	-1.84467	-1.40848	-1.08507	-1.84823	-0.51998	-1.50886	-1.59726	-0.863138	-2.04993	-1.0366	-2.02229	-0.93084	-2.04144	-2.13941	-2.23373	-1.13922	-1.96037	-1.0417	-1.77435	-0.499196	-1.44855	-0.828637	-1.96799	-1.94145	-2.07257
NaN	-2.84281	-2.15772	-3.04496	-3.54484	-1.35945	-2.94394	-3.00955	-1.05591	-2.99214	-2.42299	-3.15137	-3.13982	-2.47097	-2.74035	-1.6193	-2.1823	-3.25479	-1.81497	-3.06855	-3.08438	-3.38803	-1.66181	-2.23761	-3.46865	-2.61623	NaN	-2.29306	-3.23595	-1.44472	-3.1286	-3.19832	-1.12214	-3.17982	-2.57497	-3.33676	-1.92881	-3.26102	-3.27785	-3.60054	-1.76605	-2.78033	-2.2014	-3.1066	-1.38697	-3.00354	-1.07728	-3.05272	-3.20338	-3.32068
NaN	0.974792	0.685283	NaN	NaN	NaN	NaN	1.7362	1.38792	0.582084	0.763935	NaN	0.90791	0.886243	0.437171	-0.913106	NaN	0.705869	NaN	0.635218	NaN	NaN	1.02033	0.688265	0.175902	0.599286	NaN	0.668973	NaN	NaN	NaN	1.69488	1.35489	0.56823	0.745753	0.886301	NaN	0.620099	NaN	NaN	0.996049	0.585022	0.730859	NaN	NaN	NaN	1.48023	0.620797	0.968292	0.752814
NaN	0.611849	NaN	0.808072	0.373358	NaN	NaN	1.25017	0.999222	0.678439	1.23668	-0.367649	0.877542	0.988632	0.422559	NaN	NaN	NaN	0.00515189	1.3597	0.887372	NaN	0.774728	0.470341	0.680364	NaN	NaN	NaN	0.788839	NaN	NaN	1.22041	0.97544	0.662291	1.20724	0.856656	0.00502927	1.32734	0.866252	NaN	0.756289	NaN	NaN	0.861815	NaN	NaN	1.06568	0.72356	0.935905	NaN
NaN	0.573155	NaN	-0.107353	-0.627151	NaN	-0.377004	1.24502	-1.2744	1.00445	1.58977	-0.296748	1.56519	1.60178	NaN	0.0342859	NaN	NaN	NaN	1.45354	NaN	NaN	NaN	-0.667413	NaN	0.326722	NaN	NaN	-0.114086	NaN	-0.400651	1.21539	-1.35433	0.980543	1.55194	1.52793	NaN	1.41894	NaN	NaN	NaN	0.318946	NaN	-0.109526	NaN	-0.384636	-1.3002	1.07125	1.66928	NaN
NaN	0.588864	-1.10857	-0.291418	NaN	-1.09175	-0.777228	-0.36503	-0.253166	0.242019	-0.949594	-1.10105	NaN	-0.357809	NaN	-0.774929	-0.727324	NaN	-0.550456	0.085175	-0.189884	-0.310651	0.324147	-0.854383	-0.255568	NaN	NaN	-1.1781	-0.309697	-1.16023	-0.825978	-0.387926	-0.269045	0.236258	-1.00916	NaN	-0.584982	0.0831477	-0.201794	-0.330136	0.316432	NaN	-1.13101	-0.297318	-1.11385	-0.792962	-0.258291	0.258115	NaN	NaN
1.0523	0.121088	0.745043	NaN	0.0582367	1.61403	0.656128	-0.0111406	NaN	0.175287	0.232859	0.699157	0.184554	0.265076	NaN	0.148545	1.05405	0.350392	1.00585	0.0303263	0.0927463	0.290174	0.197912	0.540712	0.168259	NaN	1.02726	0.72731	NaN	1.57561	0.640511	-0.0118394	NaN	0.171115	0.227316	0.180161	0.981906	0.0296045	0.0905388	0.283267	0.193201	NaN	0.794594	NaN	1.72137	0.699765	NaN	0.186945	0.196828	0.373696
0.855801	0.068617	0.505901	0.0892933	0.387752	1.47616	0.545146	-0.13353	0.403683	0.10616	0.264257	0.320506	-0.0177003	0.241344	0.0641908	0.252465	0.568281	0.181679	0.370606	0.0462966	-0.0802833	0.240709	0.379153	0.548775	-0.0351827	0.570514	0.835432	0.49386	0.087168	1.44103	0.53217	-0.141905	0.394075	0.103633	0.257967	-0.0188105	0.361785	0.0451946	-0.0853189	0.23498	0.370129	0.556935	0.539547	0.0952319	1.57433	0.581402	0.430531	0.11322	-0.0180586	0.193762
NaN	0.153961	0.977712	NaN	0.799554	1.6789	0.833666	0.121546	0.573839	0.333157	1.23109	0.247882	0.278668	0.551905	0.687455	0.88839	1.23286	0.488134	0.816498	0.278176	0.196487	0.375677	0.686239	0.509019	0.600081	0.909888	NaN	0.954441	NaN	1.63894	0.813823	0.118653	0.560181	0.325227	1.20179	0.272035	0.797065	0.271555	0.19181	0.366735	0.669906	0.888232	1.04274	NaN	1.79056	0.88911	0.612004	0.355314	0.297201	0.520598
NaN	NaN	0.832135	NaN	0.682573	NaN	1.00953	0.289696	-0.0372431	0.363359	NaN	NaN	0.304051	0.66147	0.583465	0.286073	0.981658	0.373846	NaN	0.648321	0.431023	0.136434	NaN	0.589421	0.968141	NaN	NaN	0.812329	NaN	NaN	0.985498	0.282801	-0.0395792	0.354711	NaN	0.296814	NaN	0.63289	0.420764	0.133187	NaN	NaN	0.887478	NaN	NaN	1.07667	-0.0379971	0.387525	0.324272	0.398709
NaN	0.0805192	-0.102072	NaN	-0.291978	0.226936	NaN	0.229205	0.304891	-0.354162	0.220288	0.0185842	-0.167472	0.174938	0.00578126	0.626457	1.27365	NaN	NaN	-0.128898	-0.371796	NaN	0.00905064	0.0204575	NaN	NaN	NaN	-0.108475	NaN	0.221535	NaN	0.22375	0.297634	-0.376376	0.215045	-0.177977	NaN	-0.136983	-0.395116	NaN	0.00883523	NaN	-0.104139	NaN	0.242029	NaN	0.325168	-0.361331	-0.170862	NaN
4.11349	3.13013	1.08086	1.29952	1.97943	-0.426735	0.0958782	1.87058	0.707407	1.937	2.8548	2.39092	1.93876	2.53294	3.26376	2.85089	2.60337	2.36555	NaN	1.68468	2.09814	1.73627	-0.166025	1.82954	4.16351	1.81815	4.01558	1.05514	1.26859	-0.453501	0.0935962	1.82605	0.69057	1.8909	2.78686	1.89261	NaN	1.64459	2.0482	1.69494	-0.176439	1.77487	1.15275	1.38595	-0.435374	0.102255	0.754455	2.06582	2.0677	2.52287
NaN	-0.327829	1.9812	1.9143	0.724481	0.472271	1.82223	0.277354	2.99779	0.697692	1.94658	1.5852	0.669917	2.00066	NaN	2.21647	3.07783	1.33901	NaN	1.01023	0.642481	1.36829	3.44806	2.59632	NaN	2.26997	NaN	1.93405	1.86874	0.46103	1.77886	0.270752	2.92643	0.681086	1.90025	0.653972	NaN	0.986183	0.627189	1.33573	3.36599	2.21594	2.11297	2.04162	0.50368	1.94343	3.19716	0.744093	0.714471	1.42806
NaN	0.872118	1.62888	1.15864	0.111486	NaN	1.6203	0.834123	0.574137	1.11587	1.29651	1.81861	1.52955	1.68125	1.13877	-1.34558	NaN	0.75793	1.04523	1.08074	0.745812	1.31014	-0.38896	-4.42528	NaN	1.51351	NaN	1.59011	1.13107	NaN	1.58174	0.81427	0.560471	1.08931	1.26565	1.49314	1.02035	1.05502	0.728061	1.27895	-0.413357	1.47749	1.73721	1.2357	NaN	1.72806	0.612321	1.19008	1.63127	0.808337
-0.532852	1.02508	1.44095	0.165437	-0.061059	1.91569	1.35637	1.04972	1.15553	1.31318	1.10009	-1.22209	0.765481	0.119106	0.165045	1.53725	1.24415	0.762118	1.81039	0.142831	1.30835	1.43828	2.08917	0.847529	2.17849	0.229784	-0.566274	1.40666	0.161499	1.8701	1.32409	1.02474	1.12802	1.28193	1.07391	0.747261	1.7673	0.139432	1.27721	1.40405	2.03944	0.224315	1.53679	0.17644	2.0431	1.44658	1.23238	1.40052	0.81639	0.812804
NaN	-0.665844	-0.665808	NaN	NaN	-0.148155	-0.622311	-0.669748	-0.714983	-1.26119	0.0753569	-0.751614	-1.68561	-0.741291	-0.520523	-0.492834	NaN	-2.13524	-0.00991886	-1.11032	NaN	-1.82708	-0.879077	-0.737162	-0.0359274	-0.744829	NaN	-0.70757	NaN	-0.157448	-0.661344	-0.711757	-0.759829	-1.3403	0.0735633	-1.79134	-0.010541	-1.17996	NaN	-1.94168	-0.934215	-0.791547	-0.679287	NaN	-0.151155	-0.634909	-0.729457	-1.28673	-1.71973	-2.17846
NaN	1.42374	1.61771	1.32873	NaN	0.706931	1.51111	1.59478	1.29206	1.23952	2.87433	0.554373	1.56533	2.93642	1.58889	NaN	NaN	2.30561	NaN	1.99903	1.56897	2.34547	2.34831	NaN	NaN	NaN	NaN	1.57921	1.2971	0.690105	1.47515	1.55682	1.2613	1.21002	2.80591	1.52807	NaN	1.95145	1.53163	2.28965	2.29241	NaN	1.7253	1.4171	0.753947	1.61161	1.37799	1.32196	1.66943	2.45895
-0.0787172	0.420911	NaN	-0.692142	0.0161064	-0.573524	-0.661909	NaN	-1.4234	0.42869	NaN	0.392165	0.442685	0.241417	0.102173	-0.242162	-1.20001	0.32322	-0.780577	0.394241	0.543212	0.445405	-0.750084	0.300592	0.440144	NaN	-0.0836546	NaN	-0.735555	-0.609497	-0.703426	NaN	-1.51268	0.418487	NaN	0.432148	-0.829538	0.384857	0.530283	0.434803	-0.797132	NaN	NaN	-0.706153	-0.585135	-0.675309	-1.45222	0.457201	0.472126	0.344717
NaN	1.61321	2.388	2.47797	1.27036	2.35795	1.8714	1.78827	2.00474	1.60989	3.10318	2.11888	2.13362	2.13158	2.04975	1.71632	2.39275	1.72424	4.49676	1.54873	1.90289	2.14677	2.1176	2.27986	3.62956	2.66442	NaN	2.33117	2.41899	2.30182	1.82686	1.74571	1.95703	1.57157	3.02932	2.08284	4.38973	1.51187	1.85759	2.09568	2.0672	2.601	2.54682	2.64277	2.51477	1.99587	2.13807	1.71696	2.27553	1.83892
NaN	0.917898	NaN	0.304701	1.08587	0.742832	0.306403	NaN	0.624753	-0.655558	0.263745	-0.981874	NaN	0.116527	-1.14301	-0.0351661	0.623121	NaN	NaN	0.539594	0.377763	0.229743	1.01328	NaN	NaN	NaN	NaN	NaN	0.297449	0.725151	0.29911	NaN	0.609883	-0.696677	0.257467	NaN	NaN	0.526751	0.368772	0.224275	0.989164	NaN	NaN	0.324966	0.792235	0.32678	0.666304	-0.66883	NaN	NaN
NaN	-0.499673	0.388231	0.827438	0.894413	-0.254455	NaN	0.353127	0.735278	0.369533	-0.00397035	0.547205	0.5534	0.178007	-0.892165	-0.701704	0.895835	0.484855	0.193733	0.365623	0.0216514	0.995718	0.695701	0.755019	NaN	0.653319	NaN	0.378991	0.807744	-0.270415	NaN	0.344722	0.717777	0.360738	-0.00421939	0.540228	0.189121	0.356921	0.0211361	0.972019	0.679142	0.637769	0.414052	0.882468	-0.259606	NaN	0.784179	0.39411	0.590205	0.517101
NaN	0.249604	0.376655	NaN	-0.49767	-0.913475	-1.01219	-0.661035	0.0232894	-1.29453	-0.345376	-0.806713	-0.542502	-0.118276	0.364469	0.734898	NaN	-0.391154	NaN	-1.21148	-0.705563	-1.42452	-0.67191	-0.202618	-0.409146	-1.54195	NaN	0.36769	NaN	-0.970771	-1.07568	-0.702497	0.0227351	-1.37573	-0.367039	-0.576529	NaN	-1.28746	-0.749818	-1.51387	-0.714054	-1.63866	0.401705	NaN	-0.931967	-1.03268	0.0248383	-1.32074	-0.553484	-0.399073
NaN	0.139738	NaN	NaN	0.246928	-0.450155	-0.490107	0.73283	0.147788	-0.0767851	0.0661352	-0.65812	0.0546789	-1.74559	0.467349	NaN	NaN	-0.0732284	NaN	-0.0842339	0.448928	NaN	0.358265	-0.325556	NaN	NaN	NaN	NaN	NaN	-0.47839	-0.520848	0.715388	0.144271	-0.0816014	0.0645611	0.0533775	NaN	-0.0895173	0.438242	NaN	0.349738	NaN	NaN	NaN	-0.459268	-0.500029	0.157617	-0.0783396	0.0583155	-0.0747108
2.4126	0.000187914	1.8214	0.124355	NaN	1.13888	0.639387	NaN	NaN	0.149824	0.926274	0.499509	NaN	-0.474996	0.429521	0.388525	-1.14577	0.304488	1.30874	0.358457	NaN	NaN	0.680404	0.926037	NaN	0.767201	2.35518	1.77805	0.121395	1.11177	0.624169	NaN	NaN	0.146258	0.904227	NaN	1.27759	0.349925	NaN	NaN	0.66421	0.74894	1.94254	0.132625	1.21462	0.681911	NaN	0.159788	NaN	0.324738
NaN	-0.812348	NaN	NaN	-1.07245	-0.42829	NaN	NaN	-0.712358	-0.87534	-0.524112	-1.66003	-0.495534	-1.46757	-1.07999	-1.33617	NaN	NaN	NaN	-1.55455	-0.956502	NaN	-1.30901	-0.967611	NaN	NaN	NaN	NaN	NaN	-0.455153	NaN	NaN	-0.757039	-0.930244	-0.556986	-0.526615	NaN	-1.65206	-1.0165	NaN	-1.39111	NaN	NaN	NaN	-0.43696	NaN	-0.726779	-0.89306	-0.505566	NaN
-0.0824981	-0.933106	-0.376327	-0.0511511	-0.175906	-0.187111	NaN	NaN	NaN	NaN	-0.356082	NaN	-0.450534	NaN	-0.138524	NaN	-0.174289	-0.128585	-0.0962496	-0.319176	-0.562016	-0.000263958	NaN	-0.171368	-0.396674	-0.409366	-0.0876726	-0.399932	-0.0543594	-0.198847	NaN	NaN	NaN	NaN	-0.378417	-0.478793	-0.102287	-0.339195	-0.597267	-0.000280514	NaN	-0.435043	-0.383946	-0.0521866	-0.190899	NaN	NaN	NaN	-0.459655	-0.131188
-0.160641	-0.197685	-0.28289	NaN	NaN	NaN	0.440037	-0.372257	-0.396233	-0.284018	-0.344988	-0.210026	-0.448447	-0.151686	-0.159815	-0.552646	-0.169515	-0.362043	-0.629502	-0.248034	-0.526934	-0.168773	-0.182232	-0.530807	NaN	-0.38219	-0.170717	-0.300634	NaN	NaN	0.429563	-0.395606	-0.421086	-0.301832	-0.366627	-0.476575	-0.668987	-0.263591	-0.559985	-0.179359	-0.193663	-0.406162	-0.288617	NaN	NaN	0.469302	-0.404255	-0.289768	-0.457525	-0.369372
0.0595379	NaN	NaN	-0.68099	-0.232847	-0.0307448	-0.662327	-0.0519964	1.21511	NaN	-0.28706	NaN	NaN	-0.487215	-0.243313	0.829645	0.552663	NaN	-0.528444	-0.608098	0.0537946	0.481689	0.850943	NaN	NaN	-0.137349	0.0581208	NaN	-0.723703	-0.0326732	-0.703871	-0.0552578	1.18619	NaN	-0.305066	NaN	-0.56159	-0.64624	0.0525142	0.470224	0.830689	-0.145964	NaN	-0.694776	-0.0313672	-0.675736	1.29593	NaN	NaN	NaN
0.183271	0.658844	-1.54508	-0.304205	-1.33203	-1.94707	-2.332	0.655847	-4.85908	-0.576328	-0.624864	-0.249862	0.0557792	NaN	0.209155	-0.416054	-2.95225	0.451913	NaN	0.224886	0.117937	-0.576867	NaN	-3.06609	-0.627986	-1.18006	0.178909	-1.642	-0.323286	-2.0692	-2.47827	0.640237	-5.16386	-0.612477	-0.664057	0.0544516	NaN	0.219534	0.11513	-0.61305	NaN	-1.25407	-1.57636	-0.310364	-1.98649	-2.37921	-4.95745	-0.587995	0.0594889	0.481968
0.183271	0.0553406	-0.469171	-0.397778	-0.413062	-2.28934	0.200131	0.0421651	0.198649	-0.349218	-0.501778	0.592839	0.00947992	-0.076001	NaN	-0.672661	NaN	-0.352529	-1.05091	NaN	NaN	-0.488546	-0.678821	-0.0416854	NaN	NaN	0.178909	-0.498599	-0.422728	-2.43293	0.195367	0.0411615	0.193921	-0.371122	-0.533251	0.00925428	-1.11682	NaN	NaN	-0.519189	-0.721399	NaN	-0.478669	-0.405831	-2.33569	0.213441	0.211861	-0.356288	0.0101104	-0.359665
NaN	-0.46047	0.02544	NaN	-0.499218	-1.09672	-0.358767	0.327219	-0.00808537	0.584127	0.400543	0.279127	0.490212	-0.34294	-1.17272	-1.54217	-0.70354	0.518778	-1.25099	-0.212003	0.163709	0.0821397	-0.41338	-0.33346	0.0618242	-0.187171	NaN	0.0248345	NaN	-1.16551	-0.38127	0.31943	-0.00859251	0.570224	0.39101	0.478544	-1.32946	-0.2253	0.159812	0.0801846	-0.439309	-0.198911	0.027132	NaN	-1.11892	-0.36603	-0.00824905	0.622975	0.522814	0.55328
NaN	0.7769	-0.0736876	0.799796	0.498605	-0.485294	0.729926	0.901267	0.356688	0.581672	0.259635	0.556779	0.79304	1.34437	0.539933	0.494136	1.28828	0.649871	0.907958	0.851165	0.866344	1.02166	0.568319	0.220652	1.52896	0.645886	NaN	-0.0783095	0.780759	-0.515733	0.712553	0.879816	0.348199	0.567828	0.253455	0.774164	0.886348	0.830906	0.845724	0.997339	0.554792	0.630513	-0.0751793	0.852988	-0.495118	0.778471	0.380411	0.620357	0.845783	0.693092
NaN	0.974553	NaN	1.40756	NaN	0.998662	NaN	NaN	1.10732	0.859738	0.616814	1.16885	NaN	0.848658	0.413573	1.21116	NaN	NaN	1.87219	NaN	0.640272	NaN	1.19753	1.33914	NaN	0.834441	NaN	NaN	1.37406	0.974893	NaN	NaN	1.08096	0.839275	0.602133	NaN	1.82763	NaN	0.625032	NaN	1.16903	0.81458	NaN	1.50117	1.06508	NaN	1.18096	0.916916	NaN	NaN
NaN	-3.15554	-3.14305	-3.17276	-3.63162	-1.93696	-2.57481	-2.64658	-2.07921	-2.8411	-3.05606	-3.45579	-2.37196	-3.10162	-3.91627	-3.20742	-3.31297	-2.84739	NaN	-2.43637	-3.05082	-3.15655	-2.83356	-3.57779	NaN	NaN	NaN	-3.34019	-3.37177	-2.05846	-2.73631	-2.81258	-2.20963	-3.0193	-3.24775	-2.52073	NaN	-2.58918	-3.24217	-3.35454	-3.01129	NaN	-3.20668	-3.23699	-1.97618	-2.62693	-2.12131	-2.89861	-2.41997	-2.90504
NaN	-0.725118	-1.38019	-2.02906	-0.73391	2.82768	-1.86773	2.10127	-1.88574	-1.40199	-1.08642	-1.13484	-1.20149	-0.534102	-1.5405	-2.17252	NaN	-0.724553	-1.94805	0.126664	NaN	NaN	0.302552	-3.01423	NaN	-1.73968	NaN	-1.46676	-2.15632	2.76038	-1.98487	2.05126	-2.00402	-1.48992	-1.15456	-1.27685	-2.07024	0.123649	NaN	NaN	0.295351	-1.8488	-1.40813	-2.07013	3.01574	-1.90554	-1.92391	-1.43037	-1.22581	-0.739221
-0.770492	-0.609581	NaN	-1.65585	NaN	-2.2241	-1.30995	1.13082	NaN	-0.608755	-0.480336	0.0650846	NaN	-1.15181	-1.04962	-1.12963	NaN	-0.419592	NaN	-0.626169	-0.0774709	-0.609865	NaN	-0.735588	-0.552783	-1.6399	-0.81882	NaN	-1.75971	-2.3636	-1.39212	1.1039	NaN	-0.646938	-0.510465	NaN	NaN	-0.665444	-0.0823301	-0.648117	NaN	-1.74276	NaN	-1.68937	-2.26912	-1.33647	NaN	-0.621079	NaN	-0.428086
NaN	-0.831664	-0.676483	NaN	-0.337851	-0.7997	NaN	NaN	0.226696	-1.79638	-0.894908	0.25133	-0.965955	-0.0409281	-1.08018	0.170106	NaN	-1.48967	NaN	-0.495124	-1.71508	NaN	-0.460046	-0.421128	NaN	-0.691077	NaN	-0.718914	NaN	-0.849859	NaN	NaN	0.2213	-1.90906	-0.95104	-1.02654	NaN	-0.52618	-1.82266	NaN	-0.488901	-0.734424	-0.690178	NaN	-0.815889	NaN	0.241773	-1.83275	-0.98551	-1.51983
NaN	-1.15186	NaN	-2.7525	-0.286556	-0.620578	-0.691557	-2.81182	-1.20477	-1.20163	-0.882859	-2.40631	-2.26058	-1.65052	-0.604387	-0.0295545	-1.13801	NaN	NaN	-2.2921	-1.32867	NaN	-1.30685	-0.933581	-0.406683	-1.74575	NaN	NaN	-2.92514	-0.659503	-0.734933	-2.98818	-1.28033	-1.277	-0.938235	-2.40237	NaN	-2.43587	-1.41201	NaN	-1.38882	-1.85525	NaN	-2.80822	-0.633142	-0.705557	-1.22916	-1.22595	-2.30634	NaN
NaN	0.576475	-1.49956	1.0393	-0.77485	-1.68684	0.763595	-0.247909	-1.40782	1.08229	-1.39925	0.495432	-0.423443	-0.301454	0.166805	-0.671609	0.00468649	0.400142	NaN	0.101027	0.761931	0.143503	-0.329274	-0.515694	0.354206	-0.711658	NaN	-1.59362	1.01457	-1.79264	0.74542	-0.263459	-1.49612	1.05653	-1.48702	-0.450003	NaN	0.0986226	0.743796	0.140087	-0.349927	-0.756295	-1.52992	1.10843	-1.72099	0.814379	-1.43632	1.15426	-0.432016	0.426755
NaN	0.785257	NaN	0.556482	-0.511164	-1.58397	0.280972	1.30704	0.26976	1.26196	0.180086	0.713172	1.03411	1.06125	0.256592	-0.393118	-0.0644024	1.02889	NaN	1.0422	1.04494	0.85859	NaN	0.213971	0.697174	0.795803	NaN	NaN	0.543237	-1.68333	0.274285	1.27593	0.263339	1.23192	0.175799	1.0095	NaN	1.0174	1.02007	0.838154	NaN	0.776862	NaN	0.593492	-1.61604	0.299659	0.287701	1.34589	1.10288	1.09732
-0.208596	-0.278031	0.0855411	-0.318007	-0.0645078	0.238363	-0.0543802	-0.410169	-0.0419305	-0.249753	0.190269	-0.456173	-0.146941	-0.302756	-0.590202	-0.0464569	0.0924291	-0.195204	0.394833	-0.320474	-0.388622	-0.131503	0.148296	0.0107971	-0.659038	-0.286935	-0.221679	0.0835051	-0.337954	0.232689	-0.0577911	-0.435896	-0.0445605	-0.265418	0.18574	-0.156157	0.385436	-0.340575	-0.412998	-0.139751	0.144766	-0.304932	0.0912302	-0.324445	0.254216	-0.0554811	-0.0427794	-0.254809	-0.149916	-0.199156
NaN	1.16556	NaN	NaN	0.252008	NaN	-1.35789	-0.0005361	-0.315119	-0.417309	1.68647	0.194366	-0.136337	1.9716	1.05195	1.01515	NaN	0.845619	NaN	-0.361207	0.142416	NaN	-0.67112	NaN	0.837472	NaN	NaN	NaN	NaN	NaN	-1.44307	-0.000569726	-0.334884	-0.443484	1.64633	-0.144888	NaN	-0.383863	0.139026	NaN	-0.713215	NaN	NaN	NaN	NaN	-1.38538	-0.321498	-0.425757	-0.139097	0.901859
-0.0380067	-0.258382	-0.227002	-0.565053	-0.44522	0.240909	-0.21108	-0.442798	-0.382618	-0.535545	-0.211694	-0.591891	-0.567539	-0.195037	-0.212855	-0.22435	0.0111046	-0.461591	0.384314	-0.489472	-0.633464	-0.310263	0.0244026	-0.298946	-0.340385	-0.498576	-0.0403906	-0.241241	-0.600495	0.235175	-0.22432	-0.470572	-0.406617	-0.569136	-0.224972	-0.603136	0.375167	-0.520173	-0.673197	-0.329724	0.0238218	-0.529848	-0.231598	-0.576492	0.256931	-0.215353	-0.390364	-0.546387	-0.579028	-0.470936
0.41321	0.221283	1.10138	0.454123	-0.382477	NaN	0.932082	0.209447	1.27783	0.129136	0.429914	0.706353	0.665159	0.642204	-0.370289	0.369863	1.77533	0.320605	0.133734	0.340006	0.0189959	0.314104	NaN	1.11953	NaN	0.776243	0.403375	1.07517	0.443315	NaN	0.909897	0.204462	1.24741	0.126062	0.419681	0.649327	0.130551	0.331913	0.0185438	0.306628	NaN	0.757767	1.17463	0.484326	NaN	0.994072	1.36281	0.137724	0.709396	0.341928
NaN	0.918585	0.627288	0.964669	1.02755	0.579049	2.24741	0.901347	1.214	0.953681	0.150901	-0.435865	0.830979	1.05015	0.853174	1.53438	1.00991	0.843559	1.03973	0.706841	1.29873	1.06971	1.78239	1.46294	1.01161	0.442413	NaN	0.612357	0.941708	0.565267	2.19391	0.879893	1.1851	0.930983	0.14731	0.811201	1.01498	0.690018	1.26782	1.04425	1.73997	0.431883	0.669007	1.02883	0.61756	2.39687	1.29474	1.01711	0.886245	0.899661
NaN	0.659838	NaN	NaN	0.572913	0.506423	NaN	0.263712	0.859372	0.674253	-0.31884	0.457412	0.774995	0.963957	NaN	0.460059	NaN	0.65434	NaN	0.763885	NaN	0.836301	1.39767	0.827013	NaN	0.755294	NaN	NaN	NaN	0.494369	NaN	0.257435	0.838918	0.658205	-0.338839	0.756549	NaN	0.745704	NaN	0.816396	1.36441	0.737317	NaN	NaN	0.540103	NaN	0.916527	0.719096	0.826538	0.697859
NaN	-0.506946	0.149237	0.172835	-0.419436	0.826415	NaN	-0.0413384	0.42808	0.497089	0.17978	-0.0699347	0.0850169	0.569453	0.0999945	0.190814	0.843034	0.2904	NaN	0.291261	-0.00688038	0.470212	0.568273	NaN	-0.223556	NaN	NaN	0.145685	0.168722	0.806746	NaN	-0.0439313	0.417891	0.485257	0.175501	0.0829934	NaN	0.284328	-0.00731194	0.45902	0.554747	NaN	0.159163	0.18433	0.881378	NaN	0.456551	0.530149	0.0906711	0.309714
0.179555	0.192586	-0.417243	-0.744081	0.0223032	-0.67187	-0.81302	0.514055	-0.532968	-0.15137	0.154042	1.51658	0.348278	-0.271048	0.227202	0.0597729	-0.817771	0.241937	NaN	0.164564	0.135321	NaN	-0.460965	-0.218068	NaN	0.466694	0.175281	-0.443414	-0.790752	-0.714012	-0.864015	0.501819	-0.566397	-0.160864	0.150376	0.339988	NaN	0.160647	0.1321	NaN	-0.489879	0.455586	-0.42569	-0.759144	-0.685471	-0.829479	-0.543757	-0.154434	0.371441	0.258028
-1.30151	-1.00213	-1.19351	-2.01636	-1.80104	-1.14647	-1.9556	-1.60865	-0.798411	-2.04514	NaN	-1.5578	NaN	-1.95931	-1.06879	-1.248	-1.80918	-2.54416	-1.7262	-1.58699	-1.41727	NaN	-1.4483	-2.06547	NaN	NaN	-1.38314	-1.26837	-2.14283	-1.21838	-2.07826	-1.70954	-0.84849	-2.17342	NaN	NaN	-1.83447	-1.68654	-1.50617	NaN	-1.53915	NaN	-1.21767	-2.05718	-1.16968	-1.99519	-0.814574	-2.08654	NaN	-2.59566
NaN	NaN	NaN	-1.72673	-1.92068	-0.929447	-1.88357	-1.73094	-0.0158113	NaN	-1.01489	-1.65844	NaN	-1.27786	-1.24311	-0.818225	NaN	NaN	NaN	-1.82491	NaN	-1.97719	-1.38001	-1.79192	NaN	NaN	NaN	NaN	-1.83504	-0.987745	-2.00172	-1.83951	-0.016803	NaN	-1.07854	NaN	NaN	-1.93937	NaN	-2.1012	-1.46657	NaN	NaN	-1.76169	-0.948263	-1.92171	-0.0161314	NaN	NaN	NaN
NaN	NaN	0.834312	0.11359	0.459539	NaN	NaN	1.66194	0.422693	NaN	1.63501	2.11748	1.3929	NaN	2.3245	1.18238	NaN	2.09642	NaN	1.12835	NaN	0.253742	NaN	1.63231	NaN	NaN	NaN	0.814454	0.110887	NaN	NaN	1.62238	0.412633	NaN	1.5961	1.35975	NaN	1.1015	NaN	0.247702	NaN	NaN	0.889799	0.121145	NaN	NaN	0.450805	NaN	1.48554	2.23585
NaN	-0.938894	-1.23058	-1.01454	-0.659973	-0.206664	-0.775613	-0.96929	-0.661555	-1.08035	-0.84922	-0.525783	-1.00925	-0.624137	-0.812373	-0.558572	-0.715572	NaN	-1.27394	-1.09385	-1.0291	-0.908572	-0.765088	-0.736178	NaN	NaN	NaN	-1.30776	-1.07818	-0.219627	-0.824262	-1.03009	-0.70305	-1.14811	-0.902486	-1.07256	-1.35384	-1.16246	-1.09365	-0.965561	-0.813077	NaN	-1.25549	-1.03508	-0.210848	-0.791315	-0.674948	-1.10222	-1.02968	NaN
-0.502497	0.00318477	-0.856478	-1.02246	-0.910242	-1.86896	-1.55774	0.651167	-1.58117	-0.327175	-0.560951	0.394381	-0.33313	-0.136607	-0.640781	-0.890801	-1.38702	0.0482985	-1.65167	-0.0730147	0.236325	0.148089	-2.01262	-1.5674	-0.348569	-0.533381	-0.534016	-0.910199	-1.08659	-1.98619	-1.65545	0.635669	-1.68034	-0.347697	-0.596136	-0.354025	-1.75527	-0.0775944	0.2307	0.144564	-2.13886	-0.566836	-0.873817	-1.04315	-1.9068	-1.58927	-1.61318	-0.333799	-0.339874	0.0515107
NaN	NaN	-0.884901	NaN	-1.22907	-1.16671	-0.476143	-0.183611	-0.230151	0.179786	-1.16056	0.981265	NaN	0.360416	-0.19728	NaN	-0.300317	NaN	-0.426608	NaN	-0.164523	NaN	NaN	-0.936762	0.0197957	-0.108689	NaN	-0.940404	NaN	-1.23988	-0.506008	-0.195127	-0.244587	0.175507	-1.23336	NaN	-0.453367	NaN	-0.174842	NaN	NaN	-0.115507	-0.902815	NaN	-1.19032	-0.485782	-0.23481	0.191743	NaN	NaN
-0.151144	0.160071	-0.625203	NaN	-1.26665	-1.19797	-0.415068	-0.257899	-1.1672	-1.8392	-1.92681	0.908031	-0.494139	0.436043	-0.209828	-1.22682	-0.109428	-0.122376	-0.119956	-0.324359	-0.0550357	-0.0675057	-0.0411344	-2.57268	0.119416	0.265835	-0.160624	-0.664418	NaN	-1.27311	-0.441102	-0.274075	-1.24041	-1.95457	-2.04767	-0.525133	-0.12748	-0.344704	-0.0584877	-0.0717398	-0.0437145	0.259508	-0.63786	NaN	-1.22222	-0.423471	-1.19083	-1.87644	-0.504142	-0.124853
-2.36486	0.256416	-0.900289	0.418295	-1.22038	-1.23538	-1.96985	0.243025	-0.430669	0.147866	-0.677738	-1.49692	-1.32093	-1.56374	0.073006	0.2789	-0.710662	-1.20603	NaN	NaN	-0.172106	0.160925	-0.0696065	-1.02048	-1.007	NaN	-2.51319	-0.956758	0.408339	-1.31287	-2.0934	0.237241	-0.457682	0.144347	-0.720248	-1.40378	NaN	NaN	-0.182901	0.157095	-0.0739725	NaN	-0.918515	0.446114	-1.26039	-2.00973	-0.439387	0.1577	-1.34767	-1.23044
NaN	-1.52914	-0.747278	-1.96457	-1.59151	-1.4695	-0.899523	-1.99772	-0.769604	-2.27288	-0.789731	-1.70703	-1.59515	-0.980504	-1.98878	-0.379031	-1.07329	NaN	-0.541856	-1.5496	-1.71662	NaN	-0.768937	-1.38383	-1.14086	2.85434	NaN	-0.79415	-2.08779	-1.56167	-0.955943	-2.12303	-0.817876	-2.41545	-0.839265	-1.6952	-0.575843	-1.64679	-1.82429	NaN	-0.817167	2.7864	-0.762406	-2.00434	-1.49925	-0.917733	-0.785184	-2.3189	-1.62744	NaN
NaN	2.43634	2.62992	1.34699	1.82174	-0.394373	1.5261	2.74854	0.901573	2.14883	2.66406	2.47763	2.41189	2.31461	2.10737	1.09074	1.21616	2.30619	NaN	2.21811	2.24872	2.18162	1.05998	0.623577	NaN	1.3563	NaN	2.56733	1.31493	-0.419109	1.48978	2.68312	0.880114	2.09769	2.60065	2.35448	NaN	2.16531	2.1952	2.12969	1.03475	1.32402	2.80483	1.43657	-0.402357	1.6276	0.961533	2.29175	2.5723	2.45957
0.350968	0.00216264	-0.561546	NaN	0.244505	1.16621	-0.0392944	-0.263902	0.338457	-0.532486	0.734073	0.318001	0.10467	0.0378809	0.10365	-0.224087	0.645519	-0.251815	-0.0823252	-0.077265	0.0622409	-0.625983	0.510573	1.01036	0.272211	0.593028	0.342615	-0.596767	NaN	1.13845	-0.0417591	-0.280455	0.330401	-0.565886	0.716601	0.102179	-0.0874889	-0.0821113	0.0607595	-0.665247	0.498421	0.578913	-0.572914	NaN	1.24377	-0.0400899	0.360967	-0.543266	0.111631	-0.256913
0.263296	-0.289995	0.433314	0.0168202	0.105137	0.952537	NaN	-0.437769	0.288218	-0.215003	0.313094	0.123115	-0.0545613	0.074381	-0.0754487	0.192265	0.349452	-0.305708	NaN	-0.0588841	-0.028511	NaN	0.313035	0.250331	NaN	0.174776	0.25703	0.423	0.0164199	0.929865	NaN	-0.465228	0.281358	-0.228489	0.305642	-0.0579836	NaN	-0.0625775	-0.0302993	NaN	0.305584	0.170617	0.462132	0.0179389	1.01589	NaN	0.307386	-0.219356	-0.0556659	-0.311897
-0.965884	-1.44263	-1.55838	-1.97953	-0.868985	-0.227231	-0.920547	-1.8959	-1.4609	-1.74604	-0.894722	-1.9514	-1.87915	-1.654	-1.38402	NaN	-1.258	-2.21744	-1.10094	-1.78083	-1.42471	-2.46068	-1.08812	-1.326	-1.0454	-1.37626	-1.02647	-1.65613	-2.10369	-0.241483	-0.978287	-2.01482	-1.55253	-1.85556	-0.950842	-1.99701	-1.17	-1.89253	-1.51407	-2.61502	-1.15637	-1.46258	-1.58993	-2.0196	-0.231831	-0.939183	-1.49047	-1.78139	-1.91719	-2.26233
NaN	NaN	NaN	-0.345197	-0.496508	-0.354371	-0.638086	-2.00883	-1.28997	-1.54184	-0.701645	NaN	NaN	NaN	-1.60431	-0.684749	-1.19657	NaN	NaN	NaN	-1.68522	NaN	-1.02481	-0.923824	-1.70216	NaN	NaN	NaN	-0.366849	-0.376598	-0.678108	-2.13483	-1.37089	-1.63855	-0.745655	NaN	NaN	NaN	-1.79093	NaN	-1.08909	NaN	NaN	-0.352185	-0.361544	-0.651003	-1.31609	-1.57306	NaN	NaN
-1.30476	-1.51423	-1.40729	NaN	-1.18723	0.00419865	-1.29373	-2.10181	-1.30254	-2.11874	-1.06786	-1.33075	-2.25373	-1.6265	-1.73626	-1.07181	-0.891736	-2.09445	-0.909703	-2.08732	-1.83864	-2.30105	-1.14549	-1.13511	-1.54137	-1.22472	-1.3866	-1.49556	NaN	0.00409872	-1.37487	-2.23364	-1.38423	-2.25164	-1.13484	-2.39509	-0.966763	-2.21824	-1.95396	-2.44538	-1.21733	-1.30154	-1.43578	NaN	0.00447789	-1.31992	-1.3289	-2.16163	-2.29935	-2.13685
-1.39992	-3.42705	-1.40041	NaN	-3.99407	NaN	-1.96611	NaN	-3.09485	NaN	NaN	-3.46634	-3.8605	-4.6272	-2.40939	-3.04205	-0.961384	NaN	NaN	NaN	-2.39457	-1.6793	-3.54	NaN	-1.64523	NaN	-1.48773	-1.48824	NaN	NaN	-2.08943	NaN	-3.28897	NaN	NaN	-4.10265	NaN	NaN	-2.54476	-1.78463	-3.76204	NaN	-1.42876	NaN	NaN	-2.00591	-3.15751	NaN	-3.93866	NaN
3.96081	2.28484	2.46053	0.947217	1.83506	2.50199	2.26629	2.61816	2.4747	1.84072	3.24122	0.596267	1.69275	1.77974	1.36878	2.95625	2.20567	1.48302	2.87636	1.59841	2.11541	2.11016	2.19996	2.51653	3.23754	1.53032	3.86654	2.40197	0.924672	2.44243	2.21235	2.55585	2.4158	1.79691	3.16408	1.65246	2.8079	1.56037	2.06506	2.05993	2.14759	1.4939	2.62418	1.01021	2.66839	2.41701	2.63929	1.96315	1.80533	1.58166
NaN	1.50952	1.58884	1.22397	0.810164	3.06176	1.67965	1.65581	0.63335	1.51752	2.73224	-0.475268	0.43858	0.66604	1.07957	1.7008	0.519774	0.630356	1.57985	0.690171	1.5264	1.48587	1.61282	1.95205	NaN	0.14791	NaN	1.55103	1.19484	2.98888	1.63967	1.6164	0.618276	1.4814	2.66721	0.428142	1.54225	0.673744	1.49007	1.45051	1.57443	0.144389	1.69451	1.30538	3.26539	1.79136	0.675472	1.61844	0.467749	0.672279
NaN	3.348	2.85666	NaN	2.80212	0.914194	NaN	3.67089	0.347267	2.27542	4.2257	1.75716	3.24718	3.10144	3.12237	3.46387	NaN	2.7832	NaN	1.91583	NaN	NaN	-0.957681	1.09377	5.34939	2.1453	NaN	2.78867	NaN	0.892435	NaN	3.58352	0.339002	2.22126	4.12512	3.16989	NaN	1.87023	NaN	NaN	-1.01775	2.09424	3.04665	NaN	0.974994	NaN	0.370363	2.42675	3.46314	2.9683
NaN	0.556118	1.32612	NaN	0.722254	1.17429	1.06932	0.122359	0.816513	0.321614	0.751166	-0.217781	0.186421	0.629315	1.26724	1.52778	1.35123	0.178865	1.03372	0.159928	0.296493	0.487529	0.90073	0.445971	1.63491	0.982039	NaN	1.29456	NaN	1.14634	1.04387	0.119447	0.797079	0.313959	0.733288	0.181984	1.00912	0.156122	0.289436	0.475925	0.879292	0.958665	1.41432	NaN	1.25239	1.14043	0.870816	0.343004	0.19882	0.190761
NaN	0.0919746	-2.10171	-0.736104	-0.920046	-3.3509	-1.82777	0.489378	-1.90302	-0.696132	-1.93761	-0.471274	-0.594454	-1.06331	-0.190461	-1.5377	-2.0919	-0.165863	-0.796489	0.011529	-0.388966	-0.685239	-2.5483	NaN	-0.187903	-1.05723	NaN	-2.23354	-0.782274	-3.56108	-1.94242	0.47773	-2.02239	-0.739796	-2.05915	-0.63174	-0.846447	0.0112546	-0.413363	-0.728219	-2.70813	-1.12354	-2.14426	-0.751005	-3.41873	-1.86478	-1.94155	-0.710225	-0.606488	-0.16922
2.90202	0.529433	0.114043	0.347949	1.06999	-0.0284203	-0.316237	0.474546	0.115619	0.215826	0.104845	0.350971	0.439067	0.826127	0.496188	-0.171561	0.781521	0.240828	0.605391	0.620109	0.386361	0.43188	0.173244	0.319921	0.683995	0.270085	2.83295	0.111328	0.339667	-0.0302029	-0.336072	0.463251	0.112867	0.210689	0.10235	0.428617	0.590981	0.60535	0.377165	0.421601	0.169121	0.263657	0.121627	0.37109	-0.0289956	-0.322639	0.123308	0.230179	0.468268	0.256845
NaN	-0.183934	-1.74678	-0.868441	-0.210399	-1.9952	NaN	-0.445606	-0.820528	-0.69257	-1.04711	-0.166711	-0.574913	NaN	-0.54085	-1.16447	NaN	-0.662856	-1.54317	-0.104962	NaN	NaN	-1.28167	NaN	NaN	-0.452385	NaN	-1.85634	-0.922913	-2.12034	NaN	-0.473556	-0.871995	-0.73601	-1.11279	-0.610974	-1.63996	-0.111545	NaN	NaN	-1.36206	-0.48076	-1.78214	-0.886022	-2.03559	NaN	-0.837139	-0.706591	-0.586552	-0.676275
2.24371	1.96785	0.875126	1.1893	1.52448	-0.0556988	1.12655	2.07489	0.528011	1.58279	2.37698	1.82528	1.95391	1.97373	2.13158	1.7375	0.812545	1.80583	0.891269	1.76603	1.90216	1.70476	0.647431	2.38118	2.55193	1.51753	2.19031	0.854297	1.16099	-0.0591924	1.09974	2.02551	0.515443	1.54512	2.3204	1.9074	0.870055	1.724	1.85689	1.66418	0.632021	1.48141	0.933328	1.2684	-0.0568264	1.20147	0.563127	1.68806	2.08386	1.92593
0.958195	1.15765	0.311177	1.07839	0.654332	-0.456564	-0.0484456	1.50064	-0.160255	1.02742	1.23298	1.23928	1.14466	1.1935	1.33615	0.591321	0.212597	0.937299	-0.164835	1.16252	1.33162	1.01399	-0.0210883	0.975638	1.16437	0.341966	0.935389	0.303771	1.05272	-0.485201	-0.0514843	1.46493	-0.170307	1.00297	1.20363	1.11741	-0.175173	1.13485	1.29992	0.989854	-0.022411	0.333826	0.331873	1.15011	-0.465806	-0.0494264	-0.163499	1.09575	1.22079	0.999636
-0.13366	0.928442	-0.410788	0.500027	0.384028	NaN	0.0602259	NaN	-0.42996	0.535469	0.466436	0.0541101	0.390941	0.120612	0.727213	-0.143854	-0.0859659	0.407033	-0.0429584	0.633223	0.472439	NaN	NaN	-0.201629	0.944135	0.323747	-0.142043	-0.436554	0.488126	NaN	0.0587924	NaN	-0.456928	0.522724	0.455334	0.381636	-0.0456529	0.618151	0.461195	NaN	NaN	0.316041	-0.419105	0.533282	NaN	0.0642314	-0.438664	0.571081	0.416942	0.434104
NaN	-0.342541	-1.09104	-0.883923	-0.526579	-0.953881	NaN	-1.01321	-0.288518	-0.880337	-0.912121	0.0771549	-0.282217	-0.596369	-0.694151	-0.557015	-1.01938	-0.517259	-2.07244	-0.487582	-1.00594	-0.753856	-0.650789	-0.62772	-1.24026	-0.825945	NaN	-1.15948	-0.939365	-1.01371	NaN	-1.07676	-0.306615	-0.935554	-0.969332	-0.299919	-2.20243	-0.518165	-1.06903	-0.801141	-0.691608	-0.877751	-1.11313	-0.901817	-0.973191	NaN	-0.294359	-0.898158	-0.28793	-0.52773
NaN	0.803652	1.32492	NaN	0.572566	0.939421	0.691606	0.509134	0.938987	0.251314	0.897647	0.102335	0.641617	0.705091	0.982118	1.3513	NaN	0.451931	1.50572	0.419535	0.38407	NaN	0.669841	0.528898	1.30064	0.591186	NaN	1.29338	NaN	0.917062	0.675145	0.497016	0.916638	0.245332	0.876281	0.626346	1.46988	0.40955	0.374929	NaN	0.653898	0.577115	1.41303	NaN	1.0019	0.737603	1.00144	0.268028	0.68429	0.481988
NaN	-0.0646609	0.50112	-0.236501	-0.0124679	0.2822	0.268478	-0.39422	0.349456	-0.322255	0.533594	-0.424409	-0.0524371	-0.029451	0.080913	0.74037	0.579464	-0.442068	0.126171	-0.29326	-0.341062	-0.278769	NaN	NaN	0.412711	-0.0384419	NaN	0.489193	-0.251335	0.275484	0.262088	-0.418947	0.341139	-0.342468	0.520894	-0.0557261	0.123168	-0.311654	-0.362454	-0.296254	NaN	-0.0408531	0.534448	-0.241289	0.300969	0.286333	0.372698	-0.328779	-0.0534986	-0.451017
-1.40258	-1.68357	-1.515	NaN	-1.12037	-0.433296	-1.34642	-1.6102	-1.51681	NaN	-0.746227	-1.25092	-1.88552	-1.47966	-1.52488	-0.957374	-1.42554	-2.41351	NaN	-2.12848	-1.9526	-2.52775	-1.15183	-1.50246	NaN	-1.7241	-1.49055	-1.61002	NaN	-0.460474	-1.43087	-1.7112	-1.61195	NaN	-0.793032	-2.00379	NaN	-2.26198	-2.07507	-2.68629	-1.22407	-1.83224	-1.54567	NaN	-0.442068	-1.37368	-1.54752	NaN	-1.92369	-2.46237
NaN	-0.485612	NaN	-1.81544	-1.37665	-2.64878	NaN	0.225088	-1.74253	0.394392	-1.70046	-1.10618	0.216919	-0.122211	-0.802753	-1.62762	NaN	0.0405763	NaN	0.259011	0.347365	-0.171051	-1.75651	-2.46411	-1.64915	-1.61134	NaN	NaN	-1.92931	-2.81492	NaN	0.219731	-1.85182	0.385005	-1.80712	0.211756	NaN	0.252846	0.339098	-0.18178	-1.86668	-1.71241	NaN	-1.85219	-2.7024	NaN	-1.7778	0.420621	0.231345	0.0432749
NaN	-0.81025	0.306566	0.847122	-0.75776	-0.724051	NaN	0.421323	0.815096	0.869501	NaN	1.18442	0.895169	0.706754	-0.231977	-0.38527	0.239145	0.963579	NaN	0.654734	NaN	1.08571	1.05449	0.498027	NaN	1.01119	NaN	0.299269	0.826959	-0.769466	NaN	0.411295	0.795696	0.848806	NaN	0.873863	NaN	0.63915	NaN	1.05987	1.02939	0.987124	0.326955	0.903461	-0.738709	NaN	0.869306	0.927329	0.954704	1.02766
NaN	-0.192634	NaN	1.85644	0.078955	0.848505	1.77333	NaN	2.67724	1.89583	-0.088313	NaN	NaN	1.648	0.241251	0.608209	1.35824	1.97374	NaN	1.02931	1.27745	2.24312	NaN	1.71969	NaN	NaN	NaN	NaN	1.81226	0.82831	1.73112	NaN	2.61352	1.85071	-0.0938522	NaN	NaN	1.00481	1.24705	2.18973	NaN	NaN	NaN	1.97991	0.904937	1.89127	2.8553	2.02192	NaN	2.10501
-0.996676	-2.13548	-1.84247	NaN	-1.03344	-1.90031	-3.07476	-0.719297	-3.03387	-1.73325	-1.33757	-0.521377	-2.56262	-2.36616	-1.25336	-1.97306	-2.38836	-1.7419	-1.63221	-0.938798	-1.35246	-1.58346	-3.05887	-0.878163	-1.70604	-1.96226	-1.05919	-1.95803	NaN	-2.01951	-3.26762	-0.764413	-3.22417	-1.84197	-1.42147	-2.72336	-1.73459	-0.997683	-1.43729	-1.68278	-3.25073	-2.08534	-1.87977	NaN	-1.93878	-3.13701	-3.09529	-1.76834	-2.6145	-1.77716
NaN	-1.69682	NaN	-1.38705	0.111503	-0.0937913	NaN	NaN	-1.20913	-2.05862	-0.654265	-0.188915	NaN	-1.35713	-0.115262	-0.607097	NaN	-1.43729	NaN	NaN	NaN	NaN	-1.40436	-0.61261	NaN	-0.864523	NaN	NaN	-1.47405	-0.0996742	NaN	NaN	-1.28497	-2.18774	-0.695303	NaN	NaN	NaN	NaN	NaN	-1.49245	-0.918748	NaN	-1.41513	-0.09569	NaN	-1.2336	-2.1003	NaN	-1.46639
0.403186	-0.295806	0.111563	-0.248262	-0.198053	0.126364	0.0280473	-0.239017	-0.245937	-0.189161	0.0675876	-0.364117	-0.340133	-0.133252	-0.0919499	-0.208175	0.00440105	-0.304183	0.821739	-0.0485096	-0.341418	-0.190409	0.032392	-0.157313	0.335952	-0.0997335	0.393589	0.108907	-0.263833	0.123356	0.0273798	-0.254009	-0.261363	-0.201026	0.0659789	-0.361467	0.802181	-0.0515522	-0.362833	-0.202352	0.031621	-0.105989	0.118982	-0.253287	0.134768	0.0299127	-0.250916	-0.192991	-0.347018	-0.31034
-2.57902	-2.12606	-2.03931	NaN	-2.79155	-1.56905	NaN	NaN	-0.19472	-3.12312	-2.02634	-1.14508	-2.38686	-2.01717	-1.35808	-0.71901	-2.11333	-2.86057	-2.41557	-2.61747	-1.7293	-2.10955	-1.07625	-1.4562	-2.68277	-2.24323	-2.74078	-2.16722	NaN	-1.66747	NaN	NaN	-0.206934	-3.31902	-2.15344	-2.53657	-2.56709	-2.78164	-1.83777	-2.24186	-1.14375	-2.38393	-2.08059	NaN	-1.60082	NaN	-0.198662	-3.18635	-2.43518	-2.91848
NaN	-0.101049	NaN	0.747648	-2.26223	NaN	NaN	0.404095	-1.46003	0.212249	-1.24385	1.65238	-0.787781	-1.16974	-0.569686	-2.81026	0.190589	0.504637	NaN	0.0770587	0.799993	0.327632	-1.94718	-0.65873	-1.27176	-0.149721	NaN	NaN	0.729852	NaN	NaN	0.394477	-1.5516	0.207197	-1.32187	-0.837193	NaN	0.0752246	0.780952	0.319834	-2.06931	-0.159112	NaN	0.797371	NaN	NaN	-1.48958	0.226365	-0.803728	0.538199
NaN	-0.0268266	0.686635	-0.322313	NaN	NaN	0.650831	-0.187403	0.81423	-0.20698	0.522544	0.118387	-0.183432	-0.126957	-0.154714	0.651633	NaN	0.176944	-0.283636	-0.697304	-0.131799	NaN	0.422626	0.982316	NaN	NaN	NaN	0.670292	-0.34253	NaN	0.63534	-0.199158	0.79485	-0.219963	0.510106	-0.194937	-0.301426	-0.741042	-0.140066	NaN	0.412567	NaN	0.732301	-0.328838	NaN	0.694116	0.868382	-0.21117	-0.187145	0.188712
0.188807	-0.372431	0.193352	-0.591925	-0.0299815	0.343361	-0.268732	-0.548044	-0.224033	-0.572847	0.234514	-0.0672311	-0.434809	-0.196857	-0.222689	-0.116526	0.364168	-0.370702	-0.0386287	-0.664092	-0.799534	-0.387185	-0.0117679	0.323787	0.112941	-0.254219	0.184313	0.18875	-0.629052	0.335188	-0.285587	-0.582419	-0.238085	-0.608778	0.228932	-0.462082	-0.0410516	-0.705746	-0.849683	-0.41147	-0.012506	-0.270164	0.206211	-0.603908	0.366196	-0.274172	-0.228568	-0.584444	-0.443612	-0.378207
NaN	-0.338352	-0.670229	-0.106689	0.463695	NaN	-0.174277	0.0807906	-0.313198	-0.218731	-0.437655	-0.462979	0.120919	-0.152552	-0.293846	-0.363847	-0.213338	-0.473186	NaN	0.099064	NaN	-0.103347	-0.135616	-0.0851718	0.075806	-0.116874	NaN	-0.712268	-0.113381	NaN	-0.185208	0.0788677	-0.332843	-0.232451	-0.465106	0.118041	NaN	0.0967062	NaN	-0.109829	-0.144123	-0.124205	-0.683797	-0.108849	NaN	-0.177805	-0.319538	-0.223159	0.128961	-0.482766
NaN	-0.458054	-0.0353473	NaN	-0.383307	0.847808	-0.353931	-0.409757	0.00135826	-0.616718	-0.108656	-0.203941	NaN	-0.127104	-0.514786	-0.67419	1.84637	NaN	NaN	-0.503929	-0.605982	-0.432103	-0.104921	0.181736	NaN	-0.89416	NaN	-0.0375644	NaN	0.827629	-0.376131	-0.435459	0.00132593	-0.655401	-0.115471	NaN	NaN	-0.535537	-0.643991	-0.459206	-0.111502	-0.950244	-0.0360629	NaN	0.904193	-0.361097	0.0014486	-0.629203	NaN	NaN
NaN	0.0824856	0.337252	NaN	0.241607	1.00478	1.01353	0.181099	-0.32392	0.156437	0.451736	0.226467	-1.22156	NaN	1.06777	0.0620316	NaN	-0.561032	0.637069	NaN	0.349024	-0.0536035	0.689932	-0.248628	-0.814695	-2.13614	NaN	0.329224	NaN	0.980862	0.989402	0.176788	-0.344238	0.152714	0.440984	-1.29818	0.621906	NaN	0.340717	-0.0569657	0.67351	-2.27012	0.359681	NaN	1.0716	1.08093	-0.330478	0.166841	-1.24629	-0.572389
NaN	-0.206162	0.33858	NaN	NaN	-0.76859	1.22672	NaN	1.27117	-0.848571	-2.21579	0.275625	NaN	-0.0179152	-0.866511	NaN	0.359307	NaN	4.00985	-0.265327	NaN	NaN	0.873323	-0.0847284	3.44043	1.33061	NaN	0.330522	NaN	-0.816798	1.19752	NaN	1.24091	-0.901796	-2.35477	NaN	3.91441	-0.28197	NaN	NaN	0.852536	1.29894	0.361098	NaN	-0.784149	1.30831	1.35571	-0.865749	NaN	NaN
1.39426	0.934894	NaN	1.576	3.89235	NaN	1.93425	1.36605	0.755703	1.13687	-0.152447	0.949312	1.84883	1.32335	0.864239	0.558634	NaN	1.42069	NaN	1.98847	1.8942	1.59045	1.7556	NaN	0.247879	1.22767	1.36107	NaN	1.53848	NaN	1.88822	1.33353	0.737716	1.10981	-0.162009	1.80482	NaN	1.94115	1.84911	1.55259	1.71381	1.19845	NaN	1.68081	NaN	2.0629	0.805963	1.21248	1.97179	1.51517
-0.42698	1.29515	NaN	1.34418	3.28479	-1.26762	1.54307	0.884138	0.203964	1.3591	-1.16582	0.522875	0.890146	0.822042	1.18156	-0.0421528	0.844055	0.696042	NaN	1.14265	1.40416	1.25735	1.10837	-0.573154	1.3272	0.198703	-0.453762	NaN	1.31219	-1.34713	1.50635	0.863094	0.199109	1.32675	-1.23894	0.868959	NaN	1.11545	1.37074	1.22742	1.08199	0.193974	NaN	1.43358	-1.29329	1.6457	0.217529	1.44949	0.949347	0.742333
NaN	0.175995	0.761784	0.415195	0.280362	0.667286	NaN	0.0339326	0.429955	-0.0132078	0.527778	-0.0618814	0.145083	0.409005	0.331564	0.56309	NaN	0.131978	0.994682	0.190567	-0.0340251	NaN	0.68213	0.525066	1.03301	0.39102	NaN	0.743652	0.405313	0.651404	NaN	0.033125	0.419722	-0.0140363	0.515216	0.14163	0.971007	0.186031	-0.0361592	NaN	0.665894	0.381714	0.812448	0.442808	0.711665	NaN	0.45855	-0.0134752	0.154733	0.140756
NaN	0.260418	NaN	-0.25838	NaN	NaN	NaN	NaN	-0.580949	NaN	-1.70392	0.203335	0.603087	0.302891	NaN	-1.37686	NaN	0.916203	-0.413681	0.580879	0.0243877	NaN	-0.44556	-1.29108	0.26152	0.557939	NaN	NaN	-0.274586	NaN	NaN	NaN	-0.617387	NaN	-1.8108	0.588733	-0.439628	0.567053	0.0238073	NaN	-0.473507	0.544659	NaN	-0.263611	NaN	NaN	-0.592709	NaN	0.643197	0.977137
NaN	-1.44935	NaN	NaN	-0.274328	-0.773871	-1.19843	NaN	-2.11697	-1.73006	-1.18988	-2.3504	-1.96603	-1.31571	-0.823071	-2.27873	-2.07484	-1.57067	NaN	-0.244822	NaN	NaN	-0.723387	-1.50398	NaN	-1.8103	NaN	NaN	NaN	-0.822411	-1.2736	NaN	-2.24976	-1.83858	-1.26452	-2.08934	NaN	-0.260178	NaN	NaN	-0.76876	-1.92385	NaN	NaN	-0.789538	-1.22269	-2.15983	-1.76508	-2.00583	-1.60247
-2.61187	-2.64952	-1.9655	-2.51495	-1.13697	-1.17168	-2.41877	-2.96786	-2.5956	-1.84979	-1.32303	-2.27974	-1.95464	-2.33815	-1.46247	-2.20666	-2.93829	-1.97086	-2.21652	-0.733312	-2.83798	-3.08746	-1.6842	-1.45644	-2.24298	-2.68485	-2.7757	-2.08879	-2.67269	-1.24517	-2.57048	-3.15401	-2.75841	-1.96582	-1.40601	-2.07724	-2.35555	-0.779308	-3.01598	-3.28112	-1.78984	-2.85325	-2.00529	-2.56586	-1.1954	-2.46773	-2.64815	-1.88724	-1.99421	-2.01076
NaN	-1.58482	-2.03629	-2.52764	-1.58905	-1.63598	-2.45701	-1.74979	-1.29689	-1.67711	-1.71175	-1.45781	-2.06504	-1.81515	-2.1629	-2.38962	-2.4461	-2.21188	-1.61176	-1.92209	-1.90585	NaN	-2.23774	-1.67936	-2.08588	-1.59493	NaN	-2.16401	-2.68618	-1.73859	-2.61112	-1.85954	-1.37823	-1.7823	-1.81911	-2.19457	-1.71285	-2.04265	-2.02539	NaN	-2.37809	-1.69497	-2.07751	-2.57881	-1.66909	-2.50675	-1.32314	-1.71106	-2.10685	-2.25666
-0.436885	-3.945	-0.0836136	-1.54176	2.50826	-0.0616889	-0.835652	-0.481858	-4.66784	-2.47645	-0.554096	-1.44983	-2.48089	-3.0757	-3.55756	-4.73365	-3.10697	-2.32373	-1.37276	-0.318851	-0.183495	-3.30071	-1.71407	-3.19518	NaN	NaN	-0.464288	-0.0888581	-1.63846	-0.0655582	-0.888066	-0.512082	-4.96062	-2.63178	-0.588851	-2.6365	-1.45886	-0.33885	-0.195005	-3.50774	-1.82158	NaN	-0.0853063	-1.57297	-0.0629377	-0.852569	-4.76233	-2.52658	-2.53111	-2.37077
NaN	NaN	1.81106	NaN	1.1102	2.75114	1.56374	0.584083	1.9217	1.19125	4.5555	0.131183	NaN	3.32164	2.92247	3.41154	NaN	NaN	NaN	1.60194	NaN	2.14975	3.40551	1.36295	NaN	NaN	NaN	1.76795	NaN	2.68565	1.52652	0.570181	1.87596	1.1629	4.44707	NaN	NaN	1.56381	NaN	2.09859	3.32446	NaN	1.93151	NaN	2.9341	1.66774	2.04951	1.27048	NaN	NaN
NaN	0.509027	1.85044	NaN	0.961008	2.42661	1.71708	0.408683	1.31029	0.835099	1.38794	0.532005	1.20854	0.719541	0.832977	0.903119	NaN	0.986256	2.20473	0.783869	0.871521	0.755207	1.55254	1.43658	1.10739	1.78813	NaN	1.8064	NaN	2.36886	1.67621	0.398956	1.2791	0.815222	1.3549	1.17978	2.15225	0.765212	0.850778	0.737232	1.51558	1.74557	1.97351	NaN	2.588	1.83128	1.39743	0.890639	1.28892	1.05185
NaN	0.45975	1.37257	0.677989	0.870952	1.43092	1.44775	0.305852	0.920802	0.643979	1.2068	0.269099	0.808739	0.416785	0.616577	0.608536	0.884325	0.485066	1.79004	0.667475	0.63864	0.826557	1.07022	0.868326	1.19963	1.0146	NaN	1.3399	0.661851	1.39686	1.41329	0.298573	0.898886	0.628651	1.17808	0.78949	1.74743	0.651588	0.623439	0.806884	1.04475	0.99045	1.46386	0.72308	1.52608	1.54404	0.982042	0.686808	0.862526	0.517326
2.66028	0.642231	1.48043	1.18255	1.74926	NaN	2.07501	NaN	0.895296	0.561966	1.40321	0.449542	0.905072	0.56389	0.806333	0.820168	1.07276	NaN	NaN	0.606478	0.769709	1.27342	1.45667	1.7079	NaN	NaN	2.59696	1.44519	1.15441	NaN	2.02562	NaN	0.873987	0.54859	1.36981	0.88353	NaN	0.592043	0.751389	1.24311	1.422	NaN	1.57889	1.2612	NaN	2.21301	0.954839	0.599341	0.965265	NaN
NaN	0.299191	1.90048	1.13406	0.0600933	-0.96551	2.56736	1.37935	1.24686	0.885189	0.380307	1.39427	0.812853	0.649177	-0.338919	-0.312336	1.78725	0.969294	0.427704	0.729851	0.976895	1.32686	0.292763	1.21955	NaN	1.13828	NaN	1.85525	1.10707	-1.02607	2.50626	1.34652	1.21718	0.86412	0.371255	0.793506	0.417524	0.712479	0.953644	1.29528	0.285795	1.11119	2.02687	1.20948	-0.985056	2.73811	1.32979	0.94406	0.866913	1.03376
NaN	0.392313	-0.23038	0.713524	-0.136817	-0.140513	0.450354	0.9849	-0.085519	0.455925	-0.0811371	0.312966	0.391647	0.600032	0.42502	-0.0252283	0.629207	0.761284	NaN	0.00986835	0.585179	NaN	-0.180483	0.942621	NaN	0.958294	NaN	-0.24483	0.696541	-0.149326	0.439635	0.961459	-0.0908831	0.445073	-0.0862263	0.382325	NaN	0.00963347	0.571251	NaN	-0.191803	0.935485	-0.235044	0.760978	-0.143357	0.480306	-0.0872503	0.486247	0.417694	0.811915
NaN	NaN	NaN	NaN	-1.33218	NaN	NaN	NaN	-1.75378	NaN	-1.61851	-0.247806	-1.64968	-0.962504	-0.847619	-0.965768	NaN	NaN	-1.20157	-0.943795	-1.12929	-0.815919	-1.7779	-2.10403	NaN	NaN	NaN	NaN	NaN	NaN	NaN	NaN	-1.86378	NaN	-1.72002	-1.75315	-1.27694	-1.00299	-1.20012	-0.867096	-1.88942	NaN	NaN	NaN	NaN	NaN	-1.78928	NaN	-1.68308	NaN
0.39069	0.89374	-0.419986	1.28662	1.15026	-0.453539	0.735605	0.646308	0.685175	1.14649	0.026094	0.898516	1.35171	1.02425	1.04659	0.780616	1.39547	1.51077	2.64406	1.76504	1.42456	1.09493	1.12779	1.22111	1.05518	1.73964	0.381391	-0.446328	1.256	-0.481987	0.718097	0.630925	0.668867	1.1192	0.025473	1.31954	2.58113	1.72303	1.39065	1.06887	1.10095	1.69823	-0.428488	1.37219	-0.462721	0.784528	0.730744	1.22274	1.44161	1.61124
NaN	0.90094	0.145612	1.084	0.593182	-0.75914	0.809391	1.41747	0.395435	1.24055	0.70218	0.811011	1.16839	0.865642	0.524844	-0.0226719	0.209395	1.29211	NaN	0.964324	1.26587	1.39639	0.126585	0.452354	1.13189	1.23849	NaN	0.142146	1.0582	-0.806756	0.790127	1.38373	0.386023	1.21102	0.685467	1.14058	NaN	0.941371	1.23575	1.36316	0.123572	1.20901	0.155296	1.15609	-0.774508	0.863221	0.421735	1.32305	1.2461	1.37805
NaN	-0.596857	0.851491	-2.21243	0.113884	0.283764	-0.73007	-1.43011	-0.877912	-1.24765	-0.0412306	-1.1867	-0.223773	-0.50513	-0.766638	-0.552334	-1.73627	-1.43399	NaN	NaN	-0.535072	-2.09485	-0.879907	-0.113967	NaN	-0.337498	NaN	0.831224	-2.3512	0.277011	-0.775862	-1.51981	-0.932977	-1.32591	-0.0438167	-0.237809	NaN	NaN	-0.568633	-2.22624	-0.935098	-0.358667	0.908121	-2.25722	0.302637	-0.744849	-0.895684	-1.27291	-0.228303	-1.46302
-0.12425	-0.38048	1.14789	-1.38473	0.178987	-0.260562	0.385178	NaN	-1.13512	-0.656908	-0.534216	-1.44718	-1.15304	-2.18621	0.128386	0.50147	-1.37584	-1.55578	-1.01307	-1.04132	-0.10539	-1.69742	-0.402769	-0.170503	0.270199	-0.548775	-0.132043	1.12056	-1.47159	-0.276905	0.37601	NaN	-1.20632	-0.698112	-0.567723	-1.22537	-1.07661	-1.10664	-0.112001	-1.80389	-0.428032	-0.583196	1.22423	-1.41276	-0.265837	0.410795	-1.1581	-0.670207	-1.17639	-1.58728
2.30672	-1.1253	1.24085	-2.80335	1.16123	2.20159	-0.703787	-0.239369	0.646841	-1.93501	0.904667	0.0755005	0.409359	0.0913562	-1.71318	0.285241	-0.582507	NaN	0.312545	-0.316576	-0.596989	-1.06029	0.0541656	1.55837	NaN	0.690807	2.25182	1.21132	-2.97919	2.14919	-0.747931	-0.254383	0.631445	-2.05639	0.883135	0.399616	0.305106	-0.336432	-0.634435	-1.1268	0.0528764	0.674365	1.32337	-2.86011	2.34802	-0.718034	0.68986	-1.97419	0.436584	NaN
NaN	1.21205	NaN	NaN	1.66553	0.939885	NaN	0.332361	2.70792	0.694991	NaN	1.37169	1.53337	1.52441	0.694767	0.125622	NaN	1.80265	NaN	1.3668	0.394783	NaN	0.469538	2.71233	NaN	1.59728	NaN	NaN	NaN	0.917514	NaN	0.32445	2.64347	0.678449	NaN	1.49687	NaN	1.33427	0.385387	NaN	0.458362	1.55926	NaN	NaN	1.00239	NaN	2.88802	0.741213	1.63535	1.92254
NaN	1.64389	0.98754	1.44372	1.18404	NaN	1.88996	1.86523	1.8956	2.00259	1.18444	1.61918	2.11402	2.19711	1.30115	-0.391716	NaN	1.7154	NaN	NaN	1.8107	1.77551	1.6301	1.70335	NaN	0.989789	NaN	0.964035	1.40936	NaN	1.84498	1.82083	1.85048	1.95493	1.15624	2.0637	NaN	NaN	1.7676	1.73325	1.5913	0.966231	1.05322	1.53974	NaN	2.01566	2.02167	2.13578	2.25462	1.82949
2.27533	2.36674	3.04381	2.33052	1.75401	2.68687	3.03935	2.37215	2.02154	2.30098	3.38723	1.08809	1.97345	2.23042	1.98249	2.45283	3.08562	2.02138	2.98345	1.69624	2.5148	NaN	2.97492	2.85942	3.70461	1.44362	2.22117	2.97137	2.27505	2.62292	2.96701	2.31569	1.97343	2.24622	3.3066	1.92648	2.91244	1.65587	2.45495	NaN	2.90411	1.40926	3.24625	2.48551	2.86556	3.24149	2.15599	2.45402	2.1047	2.15581
NaN	-2.78681	1.26307	1.19778	-1.06881	-0.45668	-0.259613	0.782688	1.89164	0.362795	-0.364696	0.585157	NaN	0.662812	-0.477002	-2.06368	NaN	0.60002	0.740686	0.54403	NaN	0.757414	0.758047	0.842345	NaN	1.31542	NaN	1.23301	1.16927	-0.485324	-0.275897	0.764059	1.84661	0.35416	-0.387571	NaN	0.723057	0.531082	NaN	0.739387	0.740004	1.28411	1.34707	1.27744	-0.465925	-0.264869	2.01744	0.386924	NaN	0.639925
NaN	-0.321744	0.456536	-0.448908	0.077767	1.0723	0.406148	-0.409551	0.155835	-0.39565	0.477221	-0.517897	0.143924	-0.0356769	0.0499128	0.189213	0.0450774	-0.593516	0.526821	-0.0961298	-0.157195	-0.270556	0.133871	0.538089	0.00453489	0.301831	NaN	0.44567	-0.477065	1.04677	0.396481	-0.43524	0.152126	-0.420467	0.465863	0.140499	0.514282	-0.102159	-0.167055	-0.287526	0.130685	0.294647	0.486899	-0.457996	1.14361	0.433159	0.166199	-0.40366	0.153496	-0.605531
NaN	1.16083	NaN	NaN	0.435751	-0.977623	NaN	1.17069	-0.163526	0.649627	0.856512	1.09214	0.926143	1.37703	0.693746	0.170163	NaN	NaN	NaN	1.10809	0.796815	1.2575	-0.954396	NaN	NaN	NaN	NaN	NaN	NaN	-1.03894	NaN	1.14283	-0.173782	0.634165	0.836126	0.9041	NaN	1.08171	0.77785	1.22757	-1.01426	NaN	NaN	NaN	-0.997414	NaN	-0.166836	0.692831	0.987738	NaN
NaN	1.71071	3.27845	2.0709	1.07809	NaN	1.69758	NaN	2.52208	1.63206	1.98588	0.719033	1.59949	0.85843	2.41055	2.66465	2.76512	1.35612	2.60581	0.888196	1.85402	2.00079	1.92688	2.09758	NaN	2.445	NaN	3.20042	2.02161	NaN	1.65718	NaN	2.46205	1.59322	1.93861	1.56142	2.54379	0.867056	1.80989	1.95317	1.88102	2.3868	3.49649	2.20863	NaN	1.81048	2.68982	1.74061	1.70587	1.44631
NaN	0.920303	-1.597	-0.94371	-0.752907	NaN	NaN	-1.7061	-0.717312	-0.438403	0.0875923	-0.599937	0.51077	-2.10362	0.118175	-0.332486	NaN	0.183228	-0.974728	-1.01316	0.272934	-2.48241	-0.862439	-1.63914	0.678613	NaN	NaN	-1.69717	-1.0029	NaN	NaN	-1.81311	-0.762304	-0.465901	0.0855074	0.498613	-1.03587	-1.0767	0.266438	-2.63811	-0.916534	NaN	-1.62933	-0.962815	NaN	NaN	-0.731834	-0.447278	0.54474	0.195414
NaN	2.90312	-1.97227	1.87113	1.99177	2.72429	NaN	2.56612	-4.29445	1.69114	3.34285	2.25953	2.41128	1.90325	2.07697	2.25111	2.71018	1.83909	NaN	1.60692	1.62949	-1.95917	1.7259	4.18488	NaN	2.27758	NaN	-2.09598	1.8266	2.65945	NaN	2.50504	-4.56381	1.65089	3.26328	2.35389	NaN	1.56868	1.5907	-2.08205	1.68482	2.22337	-2.0122	1.99558	2.90547	NaN	-4.38139	1.80361	2.57165	1.9614
0.70887	1.07656	0.299468	0.793574	0.452432	0.555029	0.0428517	0.030154	-0.725918	0.526672	0.643042	0.0211354	-0.20411	-0.400316	0.888857	0.143008	0.888033	-0.137077	0.967215	0.228014	0.791634	0.224998	0.623042	-0.433376	1.19819	-0.261625	0.691998	0.29234	0.774686	0.541818	0.0418317	0.0294363	-0.77145	0.514136	0.627737	-0.216913	0.944193	0.222587	0.772792	0.219642	0.608213	-0.278035	0.319385	0.846353	0.591942	0.0457016	-0.740614	0.561699	-0.208242	-0.139852
1.01899	0.339423	0.719035	0.115834	0.348058	0.749609	-0.0315537	-0.214124	NaN	-0.355004	0.387235	-0.518031	0.265412	0.486548	0.269509	-0.1084	0.363683	-0.615624	0.726518	0.238922	0.31325	0.107374	0.149385	0.116833	0.695556	0.586431	0.994734	0.701921	0.113077	0.731767	-0.0335328	-0.227555	NaN	-0.377271	0.378018	0.259095	0.709226	0.233235	0.305795	0.104818	0.145829	0.572473	0.766856	0.123538	0.799463	-0.0321924	NaN	-0.362191	0.283064	-0.628087
-0.234987	-0.336647	NaN	NaN	-0.957229	0.0046657	-0.313418	0.0529707	-1.36059	-2.16631	-0.89497	-1.55688	-0.145994	-0.410995	-0.486912	-0.317771	-1.50836	-0.603812	NaN	-0.263179	-0.223196	-0.644395	-0.35189	-0.322305	-1.5477	-1.38178	-0.249726	NaN	NaN	0.00455465	-0.333077	0.0517099	-1.44593	-2.30219	-0.951106	-0.155151	NaN	-0.279686	-0.237196	-0.684813	-0.373961	-1.46845	NaN	NaN	0.004976	-0.319763	-1.38813	-2.21017	-0.148949	-0.616036
0.3717	-0.218999	-0.0841483	-0.1043	0.0213189	0.100994	-0.000821958	0.0610455	-0.148391	-0.253128	0.315739	0.112293	0.04209	0.0437469	0.0347312	0.109446	-0.384495	0.0930854	0.612962	-0.0944466	-0.250255	-0.259889	-0.0144494	-0.141358	0.0419024	-0.154054	0.362853	-0.0894263	-0.110842	0.0985897	-0.000873514	0.0595926	-0.157698	-0.269005	0.308224	0.0410882	0.598373	-0.100371	-0.265951	-0.27619	-0.0153557	-0.163717	-0.0858518	-0.106411	0.10771	-0.000838598	-0.151395	-0.258252	0.0448893	0.0992763
NaN	1.69015	-1.03692	NaN	-0.622493	-0.944775	-0.302412	0.104213	-0.705529	-0.467727	-0.436935	0.438743	0.166681	-0.371287	0.111075	-0.52157	NaN	3.12399	-1.35963	0.393236	-0.0697968	NaN	-1.03847	NaN	-0.280713	-0.134664	NaN	-1.10196	NaN	-1.00403	-0.321381	0.101733	-0.749782	-0.497064	-0.464341	0.162714	-1.44491	0.383876	-0.0741747	NaN	-1.10361	-0.143111	-1.05791	NaN	-0.963901	-0.308534	-0.719812	-0.477195	0.177766	3.33175
0.912985	0.462616	-0.0640979	NaN	0.515954	-1.26747	-0.823604	0.587678	NaN	0.0957107	0.296752	1.32616	0.774813	NaN	0.964936	-0.229219	-0.369206	0.156346	NaN	0.574687	0.480059	0.291058	-1.96101	-1.01967	0.499819	0.0212861	0.891255	-0.0681183	NaN	-1.34697	-0.875263	0.57369	NaN	0.0934326	0.289689	0.756371	NaN	0.561008	0.468633	0.28413	-2.08401	0.0207795	-0.0653955	NaN	-1.29313	-0.840277	NaN	0.102076	0.826343	0.166744
NaN	-1.5008	NaN	-2.91928	-1.363	-2.68302	-1.73914	-0.634365	-3.54644	-1.30558	-1.06381	0.418217	-1.29802	-1.49437	-2.03581	-2.25343	NaN	-1.52368	NaN	-1.02077	-0.4447	-0.178146	-3.95105	-3.05923	-0.41406	NaN	NaN	NaN	-3.10239	-2.85131	-1.84822	-0.674155	-3.76888	-1.38747	-1.13053	-1.37944	NaN	-1.08479	-0.472593	-0.18932	-4.19887	NaN	NaN	-2.97838	-2.73734	-1.77435	-3.61823	-1.33201	-1.3243	-1.55452
NaN	2.02456	-3.34935	0.906414	1.14606	NaN	0.0947156	NaN	NaN	NaN	1.02859	1.64853	1.68738	2.03568	0.143525	-0.0701082	0.675388	1.72071	-0.229911	2.41263	1.08936	1.64866	2.51796	0.646088	NaN	2.17493	NaN	-3.55943	0.884841	NaN	0.0924612	NaN	NaN	NaN	1.00411	1.64721	-0.244332	2.35521	1.06343	1.60942	2.45803	2.12316	-3.41716	0.966697	NaN	0.101015	NaN	NaN	1.7996	1.83515
NaN	0.93713	1.3501	NaN	1.72784	2.80341	1.99147	NaN	1.48386	0.117277	1.24056	1.30686	0.707257	0.1014	0.617816	1.22005	1.07603	NaN	0.690488	0.706586	0.422129	NaN	1.38653	2.24769	NaN	NaN	NaN	1.31796	NaN	2.73669	1.94407	NaN	1.44854	0.114485	1.21104	0.690423	0.674053	0.689768	0.412082	NaN	1.35353	NaN	1.43989	NaN	2.98986	2.12392	1.58255	0.125076	0.754294	NaN
NaN	-0.24853	0.250548	-0.643852	-0.342681	0.40669	-0.363898	-0.945841	0.158419	-0.861482	0.435012	-0.657505	-0.38858	-0.431647	-0.492192	0.295814	0.176086	-0.512908	-0.533532	-0.895772	-0.557175	-0.76336	-0.0735301	0.49689	-0.789472	-0.292655	NaN	0.244585	-0.684237	0.39701	-0.386723	-1.00517	0.154648	-0.915517	0.424658	-0.412953	-0.566997	-0.951957	-0.592123	-0.81124	-0.0781422	-0.311011	0.267211	-0.656887	0.433738	-0.371265	0.168955	-0.878922	-0.396447	-0.523292
NaN	-0.575778	-1.38404	NaN	-0.539461	-1.36645	NaN	NaN	-1.29037	-0.744867	-1.0081	-0.412157	-0.61093	-0.832466	-1.04537	-0.999299	NaN	-0.342278	NaN	-0.307214	-0.904007	NaN	-1.71001	-1.55666	NaN	-1.08093	NaN	-1.47085	NaN	-1.45215	NaN	NaN	-1.3713	-0.791587	-1.07133	-0.64925	NaN	-0.326484	-0.960709	NaN	-1.81727	-1.14873	-1.41205	NaN	-1.39411	NaN	-1.31649	-0.759946	-0.623298	-0.349207
NaN	1.158	NaN	1.0298	2.81069	-0.871463	0.967679	1.52134	0.991961	1.08622	0.318979	0.823956	1.31636	0.835936	1.12743	0.556617	NaN	NaN	NaN	1.44459	1.64852	NaN	0.899495	-0.106301	1.00298	1.46672	NaN	NaN	1.00529	-0.926124	0.944647	1.48513	0.968351	1.06037	0.311387	1.28503	NaN	1.41021	1.60929	NaN	0.878086	1.43181	NaN	1.09829	-0.889105	1.03204	1.05793	1.15846	1.4039	NaN
NaN	1.0987	NaN	1.58572	1.81833	-0.100305	NaN	NaN	NaN	1.50103	1.34281	NaN	1.94011	0.530881	1.96419	1.35184	NaN	NaN	NaN	NaN	NaN	1.48514	1.46052	1.44234	NaN	1.67312	NaN	NaN	1.54798	-0.106597	NaN	NaN	NaN	1.46531	1.31084	1.89393	NaN	NaN	NaN	1.44979	1.42576	1.6333	NaN	1.69118	-0.102336	NaN	NaN	1.60086	2.06914	NaN
NaN	2.20547	NaN	1.27084	1.47743	NaN	NaN	2.10394	0.632578	1.45538	1.83403	1.35846	2.09795	1.39008	2.34931	0.966018	0.77711	1.72668	0.515718	1.98748	1.75035	1.88132	0.329522	0.417465	2.32443	1.93124	NaN	NaN	1.24059	NaN	NaN	2.05387	0.617522	1.42074	1.79038	2.04801	0.503443	1.94017	1.70869	1.83654	0.321679	1.88527	NaN	1.35536	NaN	NaN	0.674649	1.55217	2.23747	1.84152
NaN	-1.41486	-0.340671	-1.222	-0.36466	0.0544595	-0.811597	-1.08065	-0.690196	-1.29555	-0.506464	0.0781292	-0.789785	-0.490312	-1.09024	-0.825955	-0.782517	-1.20565	NaN	-0.935566	-1.32907	NaN	-0.290779	-0.351057	-1.02027	-0.691366	NaN	-0.362039	-1.29865	0.0531633	-0.862503	-1.14843	-0.733487	-1.37681	-0.538231	-0.839322	NaN	-0.994248	-1.41243	NaN	-0.309018	-0.734731	-0.347568	-1.24674	0.0580814	-0.828028	-0.704168	-1.32178	-0.805773	-1.23005
NaN	-0.660576	-1.30328	-0.625799	-0.531517	-1.30068	-0.698501	-0.633152	-0.508425	-0.64267	-1.5556	-0.219875	-0.624083	-0.461389	-0.921598	-1.01427	-0.457607	-0.646646	NaN	-0.432681	-1.16118	-0.940459	-0.706297	-1.3776	NaN	-0.92156	NaN	-1.38502	-0.665052	-1.38227	-0.742313	-0.672865	-0.540315	-0.68298	-1.65317	-0.663228	NaN	-0.45982	-1.23401	-0.999447	-0.750598	-0.979363	-1.32966	-0.638468	-1.32701	-0.712641	-0.518718	-0.65568	-0.636717	-0.659737
0.234989	-0.308832	0.376339	0.185304	-1.51919	-0.727811	0.171115	0.360806	0.0528558	0.0301737	-0.124971	0.233628	-0.0935936	0.23378	0.0544845	0.199883	-0.0689692	0.528571	NaN	0.200635	0.522154	NaN	0.270491	0.16644	NaN	0.476189	0.229396	0.367382	0.180894	-0.773462	0.167042	0.352218	0.0515978	0.0294555	-0.132809	-0.099464	NaN	0.19586	0.509726	NaN	0.264053	0.464855	0.401368	0.197628	-0.742545	0.182495	0.0563711	0.0321804	-0.0954883	0.563725
NaN	-0.457328	0.266757	-0.21414	NaN	-0.32715	NaN	-0.988041	-0.701809	-0.780437	-0.883361	0.038547	-1.48935	-1.75724	-0.320083	0.324293	-0.350946	NaN	NaN	-1.34121	-0.844328	-0.349798	-0.363773	-0.686764	NaN	-0.349258	NaN	0.260407	-0.227571	-0.34767	NaN	-1.05001	-0.745829	-0.829389	-0.938768	-1.58276	NaN	-1.42534	-0.897287	-0.371738	-0.38659	-0.371165	0.284498	-0.218475	-0.333773	NaN	-0.716017	-0.796237	-1.5195	NaN
NaN	-0.834953	0.352496	-1.07823	-1.02925	-0.116814	-1.21374	-1.4016	-0.582333	-1.59185	-1.23737	0.528464	-2.3331	-1.48473	-1.20434	-0.751096	-1.11594	NaN	-1.01586	-1.64639	-1.70368	NaN	-0.48084	-0.837212	-1.38144	-0.686926	NaN	0.344106	-1.14586	-0.124141	-1.28987	-1.48952	-0.618859	-1.6917	-1.31498	-2.47944	-1.07958	-1.74966	-1.81054	NaN	-0.511	-0.730012	0.375939	-1.10006	-0.119179	-1.23831	-0.594122	-1.62408	-2.38033	NaN
NaN	-0.144936	NaN	-2.09138	0.256193	0.328979	0.673633	0.684489	0.305433	-1.86752	0.10822	-0.336336	-0.765139	0.149395	NaN	0.834887	-1.38292	-0.917084	NaN	-1.2383	-0.366916	NaN	-0.519166	-0.145767	3.55825	NaN	NaN	NaN	-2.22255	0.321149	0.6576	0.668198	0.298164	-1.98466	0.105644	-0.813131	NaN	-1.31597	-0.38993	NaN	-0.55173	NaN	NaN	-2.13371	0.350859	0.718434	0.325747	-1.90533	-0.780629	-0.93565
NaN	-0.109405	NaN	NaN	-1.48647	-0.559599	NaN	0.0450073	-0.68038	-0.72228	-1.33518	-3.28875	-0.557815	-0.82965	-0.791574	NaN	NaN	-0.434443	NaN	-0.231078	-0.767611	-0.720195	-0.890658	NaN	NaN	NaN	NaN	NaN	NaN	-0.594699	NaN	0.0439361	-0.723055	-0.767583	-1.41893	-0.592803	NaN	-0.245572	-0.815758	-0.765368	-0.946523	NaN	NaN	NaN	-0.570928	NaN	-0.694154	-0.736902	-0.569107	-0.443237
-1.05591	NaN	NaN	NaN	-1.08864	NaN	-2.11817	0.00194021	NaN	-1.18048	-1.65045	-0.92917	-0.554642	NaN	-0.90851	-1.827	-1.41119	-0.645537	NaN	0.0191991	-0.635658	-0.935164	-1.50096	-1.78401	NaN	-0.185396	-1.12214	NaN	NaN	NaN	-2.25103	0.00189403	NaN	-1.25452	-1.75397	-0.589431	NaN	0.0187421	-0.675528	-0.993821	-1.5951	-0.197025	NaN	NaN	NaN	-2.16105	NaN	-1.20438	-0.56587	-0.658605
NaN	1.14179	0.497912	1.47967	-0.114801	-0.268248	1.60265	1.559	0.811777	1.85935	0.86388	0.504243	1.30889	1.94644	0.837637	0.309533	2.25897	1.40619	1.75742	1.0652	1.4019	1.16176	1.74002	0.707947	0.409789	0.723189	NaN	0.486061	1.44445	-0.285074	1.56451	1.5219	0.792456	1.81509	0.843318	1.27773	1.71559	1.03984	1.36853	1.13411	1.6986	0.705976	0.531027	1.57808	-0.273679	1.70924	0.865766	1.98301	1.39594	1.49971
NaN	0.310962	NaN	NaN	NaN	-1.07271	NaN	1.36827	0.0516475	0.589116	-1.36226	0.765536	0.834319	0.167331	0.904397	NaN	1.0775	0.62052	NaN	0.10017	NaN	-0.188723	-0.646329	0.496496	NaN	NaN	NaN	NaN	NaN	-1.13999	NaN	1.33571	0.0504183	0.575094	-1.4477	0.814461	NaN	0.0977861	NaN	-0.200561	-0.686869	NaN	NaN	NaN	-1.09443	NaN	0.0550825	0.628296	0.889807	0.661789
-0.165876	NaN	0.37964	0.837224	0.0189876	-0.0378629	-0.305254	-0.131874	0.539119	0.261355	-0.172328	-0.394182	-0.23187	-1.1	0.0259248	0.351025	-0.301287	-0.0204744	-0.467369	NaN	-0.320376	-0.270821	0.100833	0.371968	NaN	-0.385526	-0.176281	0.370604	0.817297	-0.0402378	-0.324401	-0.140145	0.526287	0.255135	-0.183137	-0.246414	-0.496684	NaN	-0.340471	-0.287808	0.0984326	-0.409707	0.404889	0.892905	-0.0386294	-0.311434	0.574974	0.278737	-0.236564	-0.0208889
0.326471	-0.0937589	0.471373	NaN	0.101796	0.615685	0.513456	-0.313843	NaN	-0.0445444	0.310922	-0.378927	-0.317332	0.146119	-0.175849	0.175988	0.165662	-0.0816802	-0.434143	0.0517614	-0.161691	-0.266432	-0.187469	0.192146	0.081345	0.356556	0.318701	0.460154	NaN	0.601031	0.501235	-0.333528	NaN	-0.0473384	0.303521	-0.337236	-0.461374	0.0505295	-0.171833	-0.283143	-0.199227	0.348069	0.502723	NaN	0.656633	0.547605	NaN	-0.0454462	-0.323756	-0.0833337
0.326471	-0.203007	0.272487	-0.0775253	-0.116918	0.524508	0.513456	-0.292497	0.163599	-0.14762	0.331888	-0.34202	-0.324968	-0.0800354	-0.00740179	0.0897949	-0.889004	-0.318821	NaN	-0.100483	0.0463093	-0.152442	-0.0467931	-0.111957	0.105209	NaN	0.318701	0.266001	-0.0823879	0.512024	0.501235	-0.310843	0.159705	-0.156879	0.323988	-0.345351	NaN	-0.106785	0.045207	-0.162003	-0.0497282	NaN	0.290609	-0.0790947	0.559392	0.547605	0.174479	-0.150609	-0.331547	-0.325275
NaN	-0.450658	0.244246	-0.279445	-0.153775	0.59211	NaN	-0.559474	-0.0198	-0.339154	0.272074	-0.437415	-0.431514	-0.355802	-0.275434	0.143581	-0.326629	-0.435589	-0.722662	-0.572919	-0.446786	-0.160344	-0.170063	0.249088	-0.533211	-0.0168038	NaN	0.238433	-0.296972	0.578017	NaN	-0.594566	-0.0210419	-0.360427	0.265598	-0.458579	-0.767989	-0.608855	-0.47481	-0.170401	-0.18073	-0.0178578	0.26049	-0.285102	0.631489	NaN	-0.0202008	-0.34602	-0.440249	-0.444407
NaN	-0.401732	NaN	-0.872215	-0.0571473	-0.358483	NaN	0.205999	0.226458	NaN	-0.137411	-0.773856	-0.560617	NaN	-0.50999	-0.0159846	-0.239636	0.578472	NaN	NaN	-0.148473	-0.982052	-0.125634	-0.221556	NaN	-0.70623	NaN	NaN	-0.926923	-0.380968	NaN	0.201096	0.221068	NaN	-0.14603	-0.59578	NaN	NaN	-0.157785	-1.04365	-0.133514	-0.750527	NaN	-0.889872	-0.36574	NaN	0.241519	NaN	-0.571966	0.616945
NaN	-0.107202	0.244826	-0.0948314	0.0158375	0.209501	0.329483	-0.184223	-0.0108808	-0.0882917	0.206466	-0.403122	-0.082677	-0.0578313	-0.0935061	0.0563125	-0.132785	-0.0536179	0.110585	-0.0736077	-0.0695355	0.817613	0.0478565	-0.0682275	0.216405	-0.0141012	NaN	0.238999	-0.10078	0.204514	0.321641	-0.195778	-0.0115633	-0.0938296	0.201552	-0.0878628	0.107953	-0.0782246	-0.073897	0.798153	0.0467174	-0.0149856	0.261109	-0.0967512	0.223434	0.351396	-0.0111011	-0.090079	-0.0843508	-0.0547033
NaN	-0.597848	0.00994817	-0.449217	-0.209323	0.167973	0.406058	-0.862997	-0.744027	-0.48325	-0.0301061	-0.39476	-0.398446	-0.471403	-0.401952	-0.378323	NaN	NaN	NaN	0.160082	-0.176003	-0.246444	-0.469924	-0.320742	-0.29591	0.170682	NaN	0.00971139	-0.477394	0.163975	0.396393	-0.917127	-0.790694	-0.513561	-0.0319945	-0.423438	NaN	0.156271	-0.187042	-0.261902	-0.499399	0.16662	0.0106098	-0.458311	0.179144	0.433064	-0.759089	-0.493033	-0.406512	NaN
NaN	-0.575442	0.496289	-0.404502	-0.00405024	0.940267	0.0754745	-0.645838	0.240639	-0.240102	0.212325	-0.665967	-0.549625	-0.29741	-0.115681	0.405727	-0.00309137	-0.372959	-0.838655	-0.403084	-0.29151	-0.277183	0.0900804	NaN	-0.589326	0.218239	NaN	0.484477	-0.429874	0.917887	0.0736781	-0.686347	0.234912	-0.255162	0.207271	-0.5841	-0.891259	-0.428367	-0.309794	-0.294569	0.0879364	0.213044	0.529296	-0.412691	1.0028	0.0804941	0.256643	-0.244962	-0.560752	-0.380509
0.376049	0.0354183	-0.859261	0.125724	0.725789	-0.710307	NaN	0.0378646	-0.26963	0.137257	-0.269366	-0.178512	0.133959	0.413022	-0.347424	-0.658152	0.0296534	NaN	0.93452	0.260081	0.130208	0.510763	-0.38939	-0.191421	NaN	0.169913	0.367098	-0.913157	0.122731	-0.75486	NaN	0.0369634	-0.286542	0.13399	-0.286262	0.130771	0.912277	0.253891	0.127109	0.498607	-0.413814	0.165869	-0.876656	0.134085	-0.724687	NaN	-0.275089	0.146385	0.142868	NaN
NaN	1.65782	1.70023	0.612179	2.83671	0.691181	1.52193	1.0072	0.169026	0.736518	2.22492	0.647376	1.31198	1.17508	1.83883	1.78971	1.37118	0.970505	1.31238	1.72195	1.84311	1.01165	1.524	1.50728	2.0935	2.25539	NaN	1.65976	0.597608	0.67473	1.4857	0.983223	0.165003	0.718988	2.17197	1.28075	1.28115	1.68097	1.79924	0.987568	1.48773	2.20171	1.81331	0.652893	0.737149	1.62315	0.180267	0.785502	1.39923	1.03505
-0.596052	-0.524281	-0.310255	NaN	-0.274032	0.461075	-0.166188	-0.874717	-0.352507	-0.536703	-0.131897	-0.457426	-0.589442	-0.580725	-0.832009	-0.382802	-0.370476	-0.475296	-0.486923	-0.647231	-0.613657	-0.767238	-0.185601	-0.205721	-0.749866	-0.276966	-0.633438	-0.329715	NaN	0.450101	-0.176612	-0.929582	-0.374617	-0.570367	-0.14017	-0.626413	-0.517465	-0.687828	-0.652147	-0.815362	-0.197242	-0.294339	-0.316536	NaN	0.49174	-0.169553	-0.359643	-0.547568	-0.601375	-0.484918
NaN	-0.175184	-1.25045	NaN	-0.260369	-0.163266	NaN	-0.655932	NaN	-0.646365	0.0416674	0.414337	-0.722611	-1.0503	0.542374	-1.07619	NaN	-0.627008	-0.558867	-0.681537	NaN	NaN	-2.90867	-0.337589	0.0567578	NaN	NaN	-1.32889	NaN	-0.173507	NaN	-0.697074	NaN	-0.686907	0.0406756	-0.767935	-0.593921	-0.724286	NaN	NaN	-3.09111	NaN	-1.27577	NaN	-0.166572	NaN	NaN	-0.65945	-0.737239	-0.639702
0.619518	-0.0269559	-1.07833	-0.330547	-0.0980753	-0.458999	-0.0959711	-0.647554	-0.63501	-0.175189	-0.266272	-0.873838	-0.172603	-1.18774	-0.204995	-0.354993	-0.610223	-0.531073	1.28873	-0.00452666	0.130508	-0.369294	-1.00219	-0.900862	0.868773	-0.555988	0.604773	-1.14597	-0.351279	-0.487789	-0.101991	-0.688171	-0.674839	-0.186178	-0.282974	-0.183429	1.25806	-0.00481059	0.127402	-0.392457	-1.06505	-0.590861	-1.10016	-0.337238	-0.468291	-0.097914	-0.647865	-0.178736	-0.176097	-0.541824
NaN	-0.3024	-0.492286	-1.63588	-1.34046	NaN	-1.52836	-1.68656	-0.499663	-1.36813	-0.184193	-0.650358	-1.22509	-1.17737	0.109608	-0.42818	-1.18346	-1.54462	NaN	-1.44642	-1.04655	NaN	-0.78681	-0.689305	-0.166688	-0.862725	NaN	-0.523164	-1.73849	NaN	-1.62422	-1.79235	-0.531003	-1.45394	-0.195746	-1.30194	NaN	-1.53714	-1.11219	NaN	-0.836161	-0.916838	-0.502252	-1.669	NaN	-1.5593	-0.509778	-1.39583	-1.2499	-1.57589
NaN	-1.921	NaN	NaN	-3.12607	-0.818568	NaN	-2.41079	-0.729962	-2.87906	NaN	-1.58865	NaN	-2.20705	-1.53565	-1.00759	0.116016	NaN	NaN	NaN	-2.52914	NaN	-1.37964	-1.46631	NaN	-1.98667	NaN	NaN	NaN	-0.869911	NaN	-2.562	-0.775747	-3.05965	NaN	NaN	NaN	NaN	-2.68778	NaN	-1.46618	-2.11128	NaN	NaN	-0.835139	NaN	-0.744739	-2.93735	NaN	NaN
NaN	0.286565	0.880181	0.324868	0.404635	0.649014	1.07011	0.107901	0.205061	0.449471	0.445537	-0.20727	-0.0484487	-0.508076	0.423357	0.759096	NaN	-0.107437	NaN	0.0959751	0.433399	0.84212	0.73366	-1.58915	NaN	-0.0116553	NaN	0.859232	0.317136	0.633566	1.04464	0.105333	0.20018	0.438773	0.434932	-0.0514876	NaN	0.0936908	0.423083	0.822077	0.716198	-0.0123863	0.938719	0.346474	0.692178	1.14127	0.218699	0.479364	-0.0494295	-0.109612
0.47544	0.342783	0.75695	0.49975	0.518513	-0.113945	0.173604	0.548472	0.751009	0.279664	-0.156743	-0.277441	0.352802	-0.00226936	0.0886777	0.359423	0.475098	0.214315	0.369946	0.368937	0.357103	0.565333	0.588118	0.315838	0.353698	0.387388	0.464124	0.738933	0.487856	-0.121092	0.169472	0.535418	0.733134	0.273007	-0.166574	0.344405	0.361141	0.360156	0.348603	0.551877	0.57412	0.378168	0.807292	0.532987	-0.116251	0.18515	0.800956	0.298263	0.376266	0.228568
NaN	-0.115432	0.413467	0.168733	0.00605061	0.278838	NaN	-0.0848448	0.170405	-0.16937	0.0153354	0.288224	-0.299226	-0.0483133	NaN	0.122628	NaN	0.354968	NaN	-0.294585	0.0215161	-0.0205293	-0.0912501	0.193001	NaN	0.474853	NaN	0.403626	0.164717	0.272201	NaN	-0.0901665	0.166349	-0.179993	0.0149704	-0.317994	NaN	-0.313063	0.021004	-0.021817	-0.0969736	0.463551	0.440966	0.179955	0.297383	NaN	0.181738	-0.172799	-0.305284	0.378576
NaN	NaN	NaN	NaN	1.58235	0.500332	NaN	0.272217	0.422918	NaN	NaN	0.260576	NaN	0.779284	0.877358	0.931644	NaN	NaN	NaN	0.116957	0.084224	NaN	0.0581554	1.46854	NaN	-0.052311	NaN	NaN	NaN	0.488424	NaN	0.265737	0.412852	NaN	NaN	NaN	NaN	0.114173	0.0822193	NaN	0.0567712	-0.0555921	NaN	NaN	0.533608	NaN	0.451045	NaN	NaN	NaN
-0.782224	-0.313371	-0.043759	NaN	0.871292	-0.176071	0.57542	NaN	-1.41377	-1.80262	-0.071625	0.470879	NaN	-0.037923	NaN	-1.00932	0.193775	-0.972162	NaN	0.306071	0.107313	NaN	NaN	-0.331779	0.428293	-0.144391	-0.831288	-0.0465037	NaN	-0.187114	0.561724	NaN	-1.50245	-1.91569	-0.0761176	NaN	NaN	0.298786	0.104759	NaN	NaN	-0.153448	-0.0446448	NaN	-0.179635	0.613689	-1.44239	-1.83912	NaN	-0.991842
NaN	-2.88836	-1.13874	NaN	-1.71376	-1.45092	-0.47287	NaN	-2.04243	NaN	0.574099	-0.27059	-1.02934	-0.250153	-2.55315	-0.0183854	NaN	-1.96479	NaN	-0.875492	-1.09947	NaN	NaN	0.00237113	NaN	-0.913394	NaN	-1.21017	NaN	-1.54193	-0.50253	NaN	-2.17054	NaN	0.560434	-1.0939	NaN	-0.930406	-1.16843	NaN	NaN	-0.970685	-1.16179	NaN	-1.4803	-0.482442	-2.08378	NaN	-1.05017	-2.00457
NaN	-0.241691	0.53427	-0.208737	-0.232543	0.0637921	-0.265249	-0.447008	0.71848	-0.599038	-0.0181616	0.501707	0.227951	0.528239	-0.071996	0.284084	0.486276	0.169136	NaN	-0.0763188	-0.357338	-0.0884898	0.150278	0.484167	NaN	0.322071	NaN	0.521554	-0.22183	0.0622738	-0.281886	-0.475045	0.701379	-0.636611	-0.0193007	0.222525	NaN	-0.0811057	-0.379751	-0.0940401	0.146701	0.314405	0.569803	-0.212963	0.0680348	-0.270619	0.766264	-0.611165	0.243111	0.180384
-1.39326	-0.278168	-0.0975796	0.565707	-1.80203	-1.03515	-2.42976	NaN	0.0436392	-0.423157	NaN	1.52063	-0.0433229	-0.149954	-0.186591	-0.745663	0.17581	0.202784	NaN	0.289766	-0.056239	0.364207	-0.174969	-0.434583	NaN	-0.264344	-1.48065	-0.1037	0.552242	-1.10008	-2.58216	NaN	0.0426005	-0.449698	NaN	-0.0460402	NaN	0.282869	-0.0597665	0.355538	-0.185944	-0.280925	-0.099555	0.60333	-1.0561	-2.47895	0.0465415	-0.431723	-0.0441999	0.216271
NaN	-0.884612	NaN	0.201788	-1.00082	-0.795174	-0.297809	-0.399627	-0.111676	-0.526773	-0.5333	0.0398726	-0.284968	-0.107806	-0.685046	-0.81943	-0.146889	-0.208263	-0.570017	-0.204433	-0.668138	NaN	-0.00016381	-0.101667	-1.1274	-0.537566	NaN	NaN	0.196985	-0.845049	-0.316489	-0.424693	-0.11868	-0.559814	-0.566751	-0.302842	-0.605771	-0.217256	-0.710046	NaN	-0.000174084	-0.571284	NaN	0.215208	-0.811271	-0.303838	-0.113937	-0.537437	-0.290737	-0.212479
NaN	-0.117273	0.0705215	NaN	NaN	-0.468512	0.15565	-0.130853	-0.227571	-0.0771688	-0.35637	0.0404254	NaN	-0.248263	-0.439188	NaN	-0.151604	NaN	-0.232368	0.0511445	-0.445579	-0.207572	-0.0728545	NaN	-1.12481	NaN	NaN	0.068843	NaN	-0.497898	0.151945	-0.139061	-0.241845	-0.0820091	-0.378723	NaN	-0.246943	0.0499272	-0.473527	-0.220591	-0.0774241	NaN	0.0752117	NaN	-0.477996	0.166002	-0.232178	-0.078731	NaN	NaN
NaN	-0.119203	0.0637836	NaN	-0.201921	-0.233071	0.17946	0.117076	-0.0504311	NaN	-0.264619	0.408288	0.461021	0.341429	NaN	-0.400805	0.596364	0.369295	-0.552366	NaN	NaN	0.172328	0.65145	0.238206	-1.07709	0.295578	NaN	0.0622654	NaN	-0.24769	0.175188	0.11429	-0.0535943	NaN	-0.281216	0.450048	-0.587012	NaN	NaN	0.168227	0.635945	0.288543	0.0680256	NaN	-0.237789	0.191395	-0.0514521	NaN	0.491682	0.393856
NaN	-0.263216	-0.421565	-0.628419	-0.259474	-0.169573	NaN	NaN	-0.443609	-0.872382	-0.0481976	-0.633475	-0.514563	-0.659478	-0.274167	-0.114602	-0.447028	-0.76458	NaN	-0.74036	-0.525073	-0.545416	-0.482953	-0.246025	NaN	NaN	NaN	-0.448007	-0.667835	-0.180209	NaN	NaN	-0.471433	-0.927101	-0.0512207	-0.546838	NaN	-0.786797	-0.558007	-0.579626	-0.513245	NaN	-0.430099	-0.641141	-0.173006	NaN	-0.452589	-0.890043	-0.524979	-0.780058
NaN	0.307619	1.03992	NaN	NaN	0.807611	1.25734	-0.202946	1.36028	0.0985775	0.775648	NaN	0.26643	0.351985	0.257071	0.591296	1.11618	0.112376	NaN	0.372244	0.0742162	0.167557	0.688424	0.728533	NaN	0.86861	NaN	1.01517	NaN	0.788388	1.22741	-0.215676	1.3279	0.0962312	0.757186	0.260089	NaN	0.363384	0.0724498	0.163569	0.672038	0.847936	1.10908	NaN	0.861322	1.34096	1.45075	0.105134	0.284149	0.11985
2.00476	0.410964	1.1687	NaN	0.206079	0.32811	NaN	NaN	0.984605	0.171769	0.578766	-0.0177452	0.41067	0.0497949	0.560245	0.357591	0.0388947	0.202279	NaN	0.115619	NaN	NaN	-0.118459	0.880082	NaN	0.623748	1.95705	1.14088	NaN	0.3203	NaN	NaN	0.96117	0.16768	0.564991	0.400896	NaN	0.112867	NaN	NaN	-0.125889	0.608902	1.24643	NaN	0.349931	NaN	1.05009	0.183193	0.437983	0.215732
-0.559082	1.13709	0.71394	0.865415	2.56506	-0.801259	0.381417	0.848647	1.97554	0.669095	1.41296	NaN	0.738978	0.910212	0.837318	0.48802	NaN	0.586203	NaN	0.178252	0.570612	NaN	0.0290127	NaN	NaN	0.65558	-0.59415	0.696947	0.844817	-0.851516	0.372338	0.828448	1.92852	0.65317	1.37933	0.721389	NaN	0.174009	0.55703	NaN	0.0283222	0.639977	0.761422	0.922972	-0.817479	0.406783	2.10693	0.713595	0.788125	0.625189
NaN	1.07695	0.934329	0.552121	0.608445	-0.540686	-0.46242	0.525703	0.209081	0.36008	0.156464	-0.218587	0.608643	0.302495	1.19085	0.657227	NaN	0.509148	NaN	0.513064	0.203011	0.318101	-0.613514	0.0519749	NaN	0.918035	NaN	0.912091	0.53898	-0.5746	-0.491424	0.513191	0.204105	0.351509	0.15274	0.594156	NaN	0.500852	0.198179	0.31053	-0.651995	0.896185	0.996469	0.588841	-0.551632	-0.471781	0.222986	0.384027	0.649122	0.54301
2.59907	1.1572	1.8954	0.813788	1.21063	NaN	0.481842	1.37966	1.21534	NaN	1.29936	0.348032	0.987988	0.700667	1.36418	0.868634	-0.861393	1.4423	0.63099	0.828312	1.51394	0.95419	-1.36977	0.505307	NaN	1.5162	2.53721	1.85028	0.794419	NaN	0.470373	1.34682	1.18641	NaN	1.26844	0.964473	0.615972	0.808597	1.4779	0.931479	-1.45569	1.48012	2.02145	0.86791	NaN	0.513888	1.29617	NaN	1.0537	1.53822
NaN	-0.817676	0.12087	-0.664307	0.440136	-0.150611	0.146413	NaN	-0.296187	-1.00376	-0.203247	-0.556297	-0.442691	-0.390417	-0.557332	-0.254342	-0.513653	NaN	-0.642877	-0.508959	NaN	-0.98474	-0.108746	-0.21471	NaN	-0.0768048	NaN	0.117993	-0.705975	-0.160058	0.142928	NaN	-0.314764	-1.06672	-0.215995	-0.470458	-0.6832	-0.540882	NaN	-1.04651	-0.115567	-0.0816223	0.128909	-0.677755	-0.15366	0.156151	-0.302183	-1.02408	-0.451653	NaN
NaN	0.561245	0.381878	1.16444	1.20419	0.97114	NaN	0.821432	0.2237	0.804654	0.742376	1.2387	0.723337	0.976225	0.384014	-0.160705	0.803859	0.712586	NaN	0.683748	NaN	1.24112	1.42047	0.908266	NaN	NaN	NaN	0.372788	1.13672	0.948025	NaN	0.801881	0.218376	0.785502	0.724707	0.706121	NaN	0.667473	NaN	1.21158	1.38666	NaN	0.407275	1.24188	1.03573	NaN	0.238578	0.858169	0.771444	0.759978
NaN	-1.1287	0.241404	0.56289	0.065154	0.383819	NaN	NaN	0.400663	0.373296	-0.45533	-1.21163	0.262149	-0.790297	0.39427	0.280457	NaN	-0.287581	NaN	-0.486636	0.281757	NaN	0.378864	0.682965	NaN	0.00414656	NaN	0.235658	0.549493	0.374684	NaN	NaN	0.391126	0.364411	-0.48389	0.25591	NaN	-0.51716	0.27505	NaN	0.369847	0.00404787	0.257459	0.600326	0.409346	NaN	0.42731	0.398123	0.279584	-0.293402
NaN	-0.0442596	NaN	1.19298	0.488184	-1.57836	NaN	-0.8333	-0.563478	1.06504	-0.785937	0.222575	-0.710692	-1.13366	0.305273	-1.13904	0.172263	0.516964	NaN	0.323764	0.274402	-0.483619	-1.31657	-0.167759	NaN	-1.93548	NaN	NaN	1.16459	-1.67736	NaN	-0.885567	-0.598821	1.03969	-0.835234	-0.755269	NaN	0.316058	0.267871	-0.513953	-1.39915	-2.05688	NaN	1.27232	-1.61032	NaN	-0.574885	1.13587	-0.725079	0.551345
NaN	-0.288776	-0.370665	0.772589	NaN	-1.54422	NaN	0.124919	NaN	NaN	NaN	0.560302	0.0702572	-0.0135004	0.233219	-2.3565	0.587052	0.548967	NaN	0.548986	0.868615	NaN	-1.40838	0.617718	NaN	-0.0218424	NaN	-0.393914	0.754201	-1.64107	NaN	0.121946	NaN	NaN	NaN	0.068585	NaN	0.535919	0.847941	NaN	-1.49672	-0.0232124	-0.378169	0.823972	-1.57548	NaN	NaN	NaN	0.0749298	0.585477
NaN	2.40445	1.03467	1.33091	1.46151	-0.107272	2.60531	2.52497	1.49661	1.60119	2.74713	2.13613	2.54761	0.789383	1.25489	2.07066	NaN	2.81699	NaN	2.01881	2.10832	2.44964	1.69357	1.81776	NaN	NaN	NaN	1.01005	1.29923	-0.114001	2.5433	2.46487	1.46099	1.56308	2.68175	2.48697	NaN	1.97076	2.05814	2.39133	1.65326	NaN	1.10349	1.41943	-0.109444	2.77858	1.59615	1.70768	2.71704	3.00434
0.325726	0.524377	-0.425034	0.0218839	0.38145	-0.460794	-0.173916	-0.010399	0.029477	0.428336	-0.0149644	-0.298129	0.526374	0.857194	0.796642	0.0400777	-0.0599647	0.582101	-0.240048	0.156284	0.497757	0.110209	-0.454311	0.136739	0.177767	0.411975	0.317973	-0.451694	0.021363	-0.489696	-0.184824	-0.0110512	0.0287754	0.418141	-0.015903	0.513846	-0.255105	0.152564	0.48591	0.107586	-0.482807	0.402169	-0.433639	0.0233393	-0.470122	-0.177436	0.0314374	0.456824	0.561382	0.620815
NaN	1.57063	NaN	1.56959	1.42063	0.70179	1.85866	1.03606	1.80334	1.61206	1.42913	1.54799	2.09277	2.24423	1.44595	1.0546	2.52692	1.86576	2.56013	1.43631	1.68819	1.55487	1.00688	1.84987	NaN	1.67007	NaN	NaN	1.53223	0.685087	1.81442	1.0114	1.76042	1.57369	1.39512	2.04296	2.4992	1.40212	1.64801	1.51786	0.982911	1.63032	NaN	1.67398	0.748464	1.98227	1.92328	1.71928	2.23195	1.98985
3.09741	1.34944	1.04872	2.04158	1.11186	NaN	1.85881	1.28363	1.89003	1.45113	1.44642	1.92028	2.08555	1.62806	1.25423	1.22563	2.36209	1.94857	NaN	1.72867	1.53664	NaN	-0.125113	2.72066	NaN	2.24258	3.02369	1.02375	1.99299	NaN	1.81457	1.25308	1.84505	1.41659	1.41199	2.03591	NaN	1.68753	1.50006	NaN	-0.132961	2.1892	1.11846	2.17736	NaN	1.98244	2.01573	1.54764	2.22425	2.07816
-0.63899	-0.759086	0.0349686	-0.871537	-0.215465	0.0762632	-0.245761	-0.846689	-0.672899	-1.04936	-0.014053	-1.45713	-0.842354	-0.340152	-0.668804	-0.423045	-0.179707	-1.55272	NaN	-1.84087	-1.02047	-1.54282	-0.632051	-0.776162	0.146092	NaN	-0.679069	0.0341363	-0.926202	0.074448	-0.261176	-0.899796	-0.715106	-1.11518	-0.0149344	-0.895189	NaN	-1.95634	-1.08448	-1.63959	-0.671695	NaN	0.0372942	-0.88918	0.0813352	-0.250737	-0.686522	-1.0706	-0.859407	-1.58416
NaN	0.787001	-1.30621	0.771009	-0.737593	-1.68082	-0.427686	0.989534	0.0811429	0.882881	-0.982672	1.98862	1.21685	0.479612	1.08126	0.461723	-0.410106	1.33745	NaN	1.57772	1.09436	1.19595	0.104456	0.583372	NaN	0.205033	NaN	-1.38814	0.752658	-1.78625	-0.454512	0.965981	0.0792116	0.861867	-1.04431	1.18789	NaN	1.54017	1.06831	1.16748	0.10197	0.200153	-1.33265	0.822287	-1.71485	-0.436345	0.0865394	0.941599	1.29778	1.4264
NaN	-1.12731	NaN	NaN	NaN	-0.512555	NaN	-2.18643	-0.226347	NaN	-0.67633	-0.83054	-1.42015	-0.383042	-0.928209	-0.22935	NaN	NaN	-0.633894	-1.76251	NaN	-1.44905	NaN	-0.607681	NaN	-1.22919	NaN	NaN	NaN	-0.544704	NaN	-2.32357	-0.240544	NaN	-0.718752	-1.50923	-0.673654	-1.87306	NaN	-1.53993	NaN	-1.30629	NaN	NaN	-0.522931	NaN	-0.230929	NaN	-1.4489	NaN
NaN	NaN	-0.0790616	0.0522927	0.304994	0.472374	0.172075	NaN	0.574657	0.0483518	0.342847	0.122477	0.176523	NaN	0.0261687	-0.283578	0.102509	NaN	NaN	NaN	-0.104443	-0.0564531	0.295386	NaN	-0.00114251	0.522885	NaN	-0.0840206	0.0510481	0.461131	0.167979	NaN	0.56098	0.0472009	0.334687	0.172322	NaN	NaN	-0.110994	-0.059994	0.288355	0.51044	-0.0806622	0.0557706	0.50379	0.183519	0.612876	0.0515675	0.188263	NaN
1.04581	-0.300519	0.182709	-0.0620669	NaN	0.478528	0.330084	-0.607668	-0.00366781	NaN	0.105187	NaN	NaN	-0.0161128	-0.0458214	0.351343	0.0260539	NaN	NaN	-0.450634	-0.313853	NaN	0.0440597	NaN	0.133406	0.247785	1.02092	0.17836	-0.0659599	0.467139	0.322227	-0.645783	-0.00389787	NaN	0.102684	NaN	NaN	-0.478899	-0.333539	NaN	0.043011	0.241888	0.194861	-0.0633234	0.510354	0.352037	-0.00374207	NaN	NaN	NaN
NaN	-1.61473	NaN	NaN	-1.48442	-0.601804	NaN	NaN	-0.30652	-1.62452	NaN	0.0866835	-0.251934	-0.36394	-1.06468	-0.396384	NaN	-0.554451	-1.78596	-0.706781	-1.35202	-1.30233	-0.31709	-0.0877227	-1.26799	-0.906595	NaN	NaN	NaN	-0.639551	NaN	NaN	-0.325746	-1.72641	NaN	-0.267736	-1.89798	-0.751113	-1.43682	-1.38401	-0.336979	-0.96346	NaN	NaN	-0.613987	NaN	-0.312726	-1.65741	-0.257034	-0.565676
NaN	0.115909	-3.22853	0.425537	-1.13435	-1.83728	-0.539982	0.561372	-0.173152	0.617294	-0.5157	0.284434	0.665471	0.684598	-0.201092	-1.10299	0.124992	0.617497	NaN	0.808256	0.27231	NaN	-0.153712	-0.418813	-0.397383	-0.443723	NaN	-3.43104	0.415409	-1.95252	-0.573852	0.548011	-0.184013	0.602602	-0.548046	0.649632	NaN	0.789018	0.265829	NaN	-0.163354	-0.471555	-3.29389	0.453839	-1.87447	-0.550914	-0.176657	0.658349	0.709729	0.658565
NaN	-0.267208	NaN	0.136554	-1.15643	NaN	-0.469492	0.0486636	-0.0860286	0.172359	-0.72296	0.385236	0.470107	0.636536	-0.341506	-1.14784	0.164329	0.391725	NaN	0.381934	-0.190946	NaN	-0.379135	-0.756887	NaN	-0.414041	NaN	NaN	0.133304	NaN	-0.49894	0.0475053	-0.0914246	0.168257	-0.768306	0.458918	NaN	0.372843	-0.202923	NaN	-0.402916	-0.440011	NaN	0.145636	NaN	-0.478996	-0.0877702	0.183822	0.501372	0.417777
NaN	0.970603	0.0472338	0.508197	0.629455	-0.947961	0.4148	0.985977	0.178049	0.958369	0.882538	-0.134269	1.48564	1.50472	1.10424	0.858318	1.06843	1.83216	NaN	1.42093	0.991954	1.6904	-0.124332	0.113853	0.860131	1.31224	NaN	0.0461095	0.496102	-1.00742	0.404928	0.962509	0.173811	0.935559	0.861533	1.45028	NaN	1.38711	0.968344	1.65017	-0.13213	1.28101	0.0503751	0.541996	-0.967152	0.442388	0.18989	1.02211	1.58445	1.95401
NaN	0.619138	-1.0981	-0.445091	-1.31972	-2.14356	-0.682764	-0.260673	-0.623054	0.50607	-1.27905	-0.522847	0.027744	-0.237553	0.650414	-0.532922	-0.759462	0.513324	-1.11363	0.0373741	-0.0843545	0.0256202	-0.435298	-1.48929	-0.637225	-0.649614	NaN	-1.16698	-0.473008	-2.27801	-0.725589	-0.277024	-0.662134	0.494025	-1.35928	0.0270837	-1.18348	0.0364846	-0.0896455	0.0250104	-0.462601	-0.69036	-1.12033	-0.454101	-2.18696	-0.696586	-0.635667	0.539727	0.0295892	0.547464
NaN	1.08845	-0.42146	0.0924469	-0.642935	-1.63816	0.691315	0.950679	-0.671399	1.07999	0.337865	0.480713	0.636958	1.0997	1.00643	-0.226984	0.285943	1.46853	-0.329	0.835405	1.04552	NaN	-0.39925	-0.658834	0.788492	-0.137349	NaN	-0.447895	0.0902466	-1.74091	0.674861	0.928051	-0.713511	1.05428	0.329823	0.621798	-0.349636	0.815521	1.02064	NaN	-0.424292	-0.145964	-0.429992	0.0985953	-1.67132	0.737293	-0.68499	1.15181	0.67932	1.5662
NaN	1.2306	-0.416187	0.285351	-0.53278	-1.86476	0.69642	1.0572	-0.741644	1.21483	0.276752	0.415128	0.617228	0.936855	0.933145	-0.275087	0.203611	1.51115	-0.443643	0.927806	1.01894	0.218188	-0.466063	-0.833901	0.807062	-0.527242	NaN	-0.442292	0.278559	-1.98173	0.679844	1.03203	-0.788163	1.18591	0.270165	0.602537	-0.47147	0.905723	0.994684	0.212995	-0.495295	-0.560312	-0.424612	0.304328	-1.90251	0.742737	-0.756658	1.29562	0.658278	1.61165
0.396718	0.958977	-0.181842	0.137459	-0.655759	-1.41578	-0.100938	0.640344	-0.138598	0.688145	0.0453673	0.576414	0.753803	0.691213	0.821124	-0.444035	0.305559	1.32058	0.161714	0.89448	0.430715	0.660426	-0.293894	-0.258721	-0.0594267	0.603527	0.387275	-0.193248	0.134187	-1.50459	-0.107269	0.625103	-0.147292	0.671767	0.0442875	0.735861	0.157865	0.87319	0.420464	0.644707	-0.312328	0.589162	-0.185524	0.146601	-1.44445	-0.102981	-0.141404	0.733912	0.803936	1.40841
NaN	-0.875415	-1.83532	-1.92261	-2.09688	-2.65434	-2.38797	NaN	-1.51603	NaN	-2.0829	-0.670731	NaN	-0.896405	-1.15427	-1.24572	-1.97331	-0.59913	-2.27455	-0.940115	-1.57645	-1.67322	-1.65958	-2.12307	-1.64714	NaN	NaN	-1.95044	-2.0432	-2.82082	-2.53775	NaN	-1.61112	NaN	-2.21355	NaN	-2.41722	-0.999082	-1.67533	-1.77817	-1.76367	NaN	-1.87247	-1.96153	-2.70807	-2.43631	-1.54672	NaN	NaN	-0.611259
0.803226	1.12122	0.132188	0.801078	-0.917751	-1.76087	-0.585239	-0.0711852	-0.139465	1.08877	-0.197146	0.63395	0.162357	0.0577523	1.47268	-0.50183	-0.300559	1.06087	NaN	0.561617	1.12318	0.311579	-0.727353	-0.137084	1.64919	0.113271	0.784108	0.129042	0.782011	-1.87132	-0.621947	-0.0756501	-0.148213	1.06286	-0.209512	0.158493	NaN	0.54825	1.09645	0.304163	-0.772975	0.110575	0.14098	0.854355	-1.79652	-0.597086	-0.142288	1.16118	0.173155	1.13142
0.818263	1.18776	-0.197344	0.440272	-0.399143	-1.81941	-1.5961	1.37358	-0.150972	1.15941	-0.00454473	0.679594	1.55681	1.24121	1.41032	0.26768	0.717616	1.49506	-0.75372	1.12164	0.884283	1.16294	0.0905449	-1.17182	0.74684	1.06405	0.798787	-0.209722	0.429793	-1.93353	-1.69621	1.34088	-0.160442	1.13182	-0.00482979	1.51976	-0.800996	1.09494	0.863236	1.13526	0.0883898	1.03872	-0.201339	0.469553	-1.85624	-1.62841	-0.154028	1.23652	1.66035	1.59449
-0.849039	0.80793	-0.931454	-0.48078	-1.12584	-1.73967	-2.78174	-0.539964	-0.376621	0.141775	-1.22511	-2.6349	-0.518441	-1.41809	0.826635	-0.651665	NaN	0.409823	0.173978	-0.0582173	NaN	-0.985635	0.0452128	-1.27375	-0.750901	-1.15975	-0.902294	-0.989877	-0.510936	-1.84879	-2.95622	-0.573832	-0.400244	0.1384	-1.30195	-0.550959	0.169837	-0.0618689	NaN	-1.04746	0.0441367	-1.23249	-0.95031	-0.490513	-1.77489	-2.83805	-0.384246	0.151204	-0.528937	0.437079
0.46757	-0.462522	0.349543	-0.273007	-0.12455	-0.0229452	0.183361	-0.391612	0.0116274	-0.545202	-0.0947358	-0.368383	-0.33313	0.119685	-0.172668	0.161961	0.494292	-0.507696	0.607352	-0.382372	-0.414035	-0.280881	NaN	-0.0297022	0.0202957	-0.16046	0.456441	0.341224	-0.290131	-0.0243844	0.178997	-0.416175	0.0113507	-0.579399	-0.100678	-0.354025	0.592896	-0.406356	-0.440005	-0.298499	NaN	-0.170525	0.372791	-0.278534	-0.0234097	0.195556	0.0124007	-0.556239	-0.339874	-0.517974
1.59311	2.03013	1.04594	NaN	1.18783	-0.636634	1.79993	1.92401	1.5844	1.02691	NaN	2.10009	2.10565	2.94616	0.695029	1.4186	2.54082	1.11387	NaN	2.00892	1.70037	2.17194	2.17509	0.0117249	NaN	1.82576	1.55519	1.02105	NaN	-0.676566	1.75709	1.87822	1.54669	1.00247	NaN	2.05553	NaN	1.9611	1.6599	2.12024	2.12332	1.78231	1.1155	NaN	-0.649522	1.91964	1.68977	1.09521	2.24569	1.18795
NaN	0.922599	NaN	2.09045	0.387691	NaN	NaN	0.821139	0.877487	1.40759	-1.06033	0.0128613	-0.503879	NaN	1.75344	0.957485	1.01565	0.67299	NaN	NaN	1.13487	1.70969	2.99352	-0.0145772	NaN	NaN	NaN	NaN	2.0407	NaN	NaN	0.801595	0.856602	1.37409	-1.12684	-0.535484	NaN	NaN	1.10786	1.669	2.92227	NaN	NaN	2.22948	NaN	NaN	0.935846	1.5012	-0.51408	0.717748
NaN	-0.150137	-1.65365	-0.210827	-0.866204	-1.46471	-0.550758	0.102915	0.0666397	0.0544277	-1.02963	0.311151	-0.0243406	0.282897	-0.639513	-0.9094	NaN	0.461791	NaN	0.00679622	0.11519	NaN	-0.377726	-0.166457	-1.10282	-0.07979	NaN	-1.75737	-0.224051	-1.55658	-0.585303	0.100465	0.0650535	0.0531323	-1.09421	-0.0258673	NaN	0.00663446	0.112448	NaN	-0.401418	-0.0847947	-1.68713	-0.215095	-1.49436	-0.561908	0.0710717	0.0580476	-0.0248334	0.492504
NaN	-0.113314	NaN	0.0290582	-0.868882	-1.34739	NaN	0.151552	0.155683	0.151073	NaN	0.329867	0.0728402	-0.0444236	-0.586801	-1.07332	NaN	NaN	NaN	0.395403	NaN	NaN	-0.178355	NaN	-0.951409	-0.0520115	NaN	NaN	0.0283665	-1.43191	NaN	0.147945	0.151978	0.147478	NaN	0.0711065	NaN	0.385992	NaN	NaN	-0.189542	-0.0552738	NaN	0.0309907	-1.37467	NaN	0.166037	0.161121	0.0776845	NaN
NaN	0.162693	NaN	0.591562	-0.204238	0.720031	NaN	NaN	-0.207592	0.170576	0.482347	-0.10428	-0.196483	-0.237145	0.255079	0.23929	NaN	-0.261549	NaN	NaN	NaN	NaN	0.00168234	1.06303	NaN	0.161849	NaN	NaN	0.577482	0.702893	NaN	NaN	-0.220612	0.166516	0.470867	-0.208807	NaN	NaN	NaN	NaN	0.00164229	0.157997	NaN	0.630905	0.767918	NaN	-0.211794	0.18192	-0.20046	-0.266844
NaN	0.996114	1.40758	1.00882	NaN	2.27023	NaN	NaN	1.05963	1.05573	1.82958	0.617191	0.964501	1.44815	1.29163	2.41092	NaN	0.528034	1.01066	0.437361	NaN	NaN	2.25461	1.83231	NaN	NaN	NaN	1.37407	0.984811	2.2162	NaN	NaN	1.03441	1.03061	1.78604	0.941545	0.9866	0.426951	NaN	NaN	2.20095	NaN	1.50119	1.07592	2.42122	NaN	1.13011	1.12595	1.02865	0.563152
NaN	-0.17533	NaN	-0.127488	NaN	NaN	NaN	-0.220214	0.0281115	-0.485219	0.540748	-0.812312	-0.312647	0.0795983	0.156329	0.854649	NaN	-0.500514	-0.641957	-0.166368	NaN	NaN	0.297326	0.526579	NaN	NaN	NaN	NaN	-0.135485	NaN	NaN	-0.234026	0.0274424	-0.515654	0.527877	-0.332257	-0.682222	-0.176804	NaN	NaN	0.290249	NaN	NaN	-0.130069	NaN	NaN	0.0299811	-0.495042	-0.318976	-0.510647
NaN	-0.0955809	0.165943	-0.18215	-0.462846	-0.232197	-0.163036	0.133051	-0.0158899	-0.14958	0.0206567	-0.257902	-0.0955659	-0.710551	-0.132407	-0.257049	-0.955099	-0.235501	-0.263227	-0.0741346	0.00588985	-0.387798	-0.55092	-0.401639	-0.0400914	-0.241922	NaN	0.161993	-0.193576	-0.246761	-0.173262	0.129884	-0.0168866	-0.158962	0.0201651	-0.10156	-0.279738	-0.0787846	0.00574966	-0.412121	-0.585476	-0.257096	0.176979	-0.185838	-0.236897	-0.166337	-0.0162116	-0.152608	-0.0975005	-0.240269
NaN	-0.935477	-0.194505	-0.527272	-0.0733237	-0.806369	-0.863037	-0.600841	-0.221851	-0.777619	-0.325454	-0.239557	-0.498827	-0.699265	-0.67465	-0.840524	NaN	NaN	NaN	-0.542887	-0.527244	-0.577512	-0.409464	-0.508481	NaN	-0.54206	NaN	-0.206705	-0.560344	-0.856947	-0.917169	-0.638528	-0.235767	-0.826394	-0.345867	-0.530115	NaN	-0.576939	-0.560314	-0.613736	-0.435146	-0.57606	-0.198442	-0.537946	-0.822693	-0.880508	-0.226343	-0.793361	-0.508925	NaN
-0.284163	-0.292565	-0.292148	-0.194639	-0.170717	0.283249	-0.130357	-0.327296	0.0495706	-0.414434	0.0794246	-0.0952658	-0.227227	NaN	-0.395344	-0.0971536	0.458118	-0.308063	0.0791558	NaN	-0.355461	-0.278373	0.317597	0.259612	0.0229648	-0.302516	-0.301987	-0.310472	-0.206848	0.276507	-0.138534	-0.347825	0.0483907	-0.440428	0.0775342	-0.241479	0.0772718	NaN	-0.377756	-0.295833	0.310038	-0.321491	-0.298062	-0.19858	0.302087	-0.132996	0.0528674	-0.422823	-0.231827	-0.314299
0.471963	-0.380989	NaN	-0.153623	0.464296	-0.116159	NaN	NaN	0.328699	-0.416505	0.353624	0.165451	-0.0634953	-0.503995	-0.52025	-0.212702	NaN	NaN	NaN	-0.316576	NaN	-0.435903	-0.398395	0.281101	NaN	-0.0440536	0.460729	NaN	-0.163258	-0.123445	NaN	NaN	0.320876	-0.442629	0.345208	-0.0674779	NaN	-0.336432	NaN	-0.463244	-0.423384	-0.0468168	NaN	-0.156732	-0.11851	NaN	0.35056	-0.424936	-0.0647807	NaN
NaN	0.831168	NaN	1.73599	0.786131	-0.549554	NaN	0.837721	1.48621	1.28366	-0.213959	0.59579	1.18361	NaN	0.530818	0.711724	2.17327	1.70349	NaN	0.801036	1.0664	1.95687	2.24792	0.927697	-1.57244	1.38908	NaN	NaN	1.69467	-0.584023	NaN	0.817782	1.45083	1.25311	-0.227379	1.15544	NaN	0.78197	1.04102	1.91029	2.19442	1.35601	NaN	1.85144	-0.560679	NaN	1.58505	1.36904	1.26233	1.81679
NaN	0.729945	0.522547	0.54743	0.299286	0.173409	0.856802	0.470618	0.553923	0.482028	0.257272	0.344407	0.556916	0.973201	1.04989	0.981106	0.64474	0.546233	0.365332	0.369513	0.337999	0.683343	0.45764	0.433641	0.539963	0.619727	NaN	0.51011	0.5344	0.169282	0.836409	0.459416	0.540738	0.470555	0.251149	0.54366	0.356637	0.360718	0.329954	0.667079	0.446748	0.604977	0.5573	0.583838	0.184942	0.913785	0.590762	0.514087	0.593955	0.582561
NaN	0.888647	0.717926	NaN	0.675047	NaN	1.09141	0.389844	0.683261	NaN	0.438236	0.449456	0.36134	1.04375	1.02436	1.37357	NaN	0.533801	NaN	0.458466	0.356242	NaN	0.93857	0.555579	NaN	0.747951	NaN	0.700838	NaN	NaN	1.06543	0.380565	0.666998	NaN	0.427806	0.35274	NaN	0.447554	0.347763	NaN	0.916231	0.730149	0.765673	NaN	NaN	1.16399	0.728702	NaN	0.385372	0.569302
NaN	-1.48948	-0.387692	NaN	NaN	-0.674389	NaN	-0.664426	-0.102209	-0.596824	NaN	-0.208891	-0.645459	-1.29459	-0.784969	-1.08183	-1.63116	-0.731595	NaN	-0.41727	-0.160769	NaN	NaN	-0.100805	-1.56045	0.225172	NaN	-0.41201	NaN	-0.716689	NaN	-0.706101	-0.10862	-0.634259	NaN	-0.685944	NaN	-0.443443	-0.170853	NaN	NaN	0.219813	-0.395541	NaN	-0.688042	NaN	-0.104278	-0.608906	-0.658526	-0.746405
-0.0222188	-0.180586	-0.287874	-0.0655584	0.0578135	0.404492	-0.147287	-0.52469	-0.0226201	-0.204967	0.296171	-0.498079	-0.146467	-0.50581	-0.363103	-0.0853211	0.178178	-0.347951	0.286614	-0.280935	-0.213185	-0.0491409	-0.0160558	0.266875	0.13735	0.0401635	-0.0236124	-0.30593	-0.0696704	0.394864	-0.156526	-0.5576	-0.0240389	-0.217823	0.289122	-0.155654	0.279792	-0.298556	-0.226557	-0.0522232	-0.0170629	0.0392076	-0.293702	-0.0668856	0.431393	-0.150269	-0.023078	-0.209116	-0.149433	-0.354995
NaN	0.315235	0.443922	0.232807	0.315215	0.242076	NaN	-0.0520913	0.46877	0.108116	0.101103	0.157969	0.464863	0.0577523	0.209952	0.126116	0.553106	0.236005	-0.0758321	0.247338	NaN	0.30059	0.296973	0.721828	0.0234656	0.611767	NaN	0.433356	0.227266	0.236314	NaN	-0.0553586	0.457612	0.105542	0.0986962	0.453799	-0.0805886	0.241451	NaN	0.293436	0.289905	0.597206	0.473446	0.24829	0.258175	NaN	0.499946	0.115306	0.49578	0.251701
NaN	-1.33523	-1.73743	-1.42717	-0.480677	-0.758027	-1.48536	-1.49309	-1.34431	-1.33932	-1.0119	-0.295827	-1.32704	-1.63104	-0.950828	-1.16889	-1.2348	-1.80057	NaN	-1.20324	-1.59225	-1.64422	-1.36345	-0.897779	NaN	-0.680628	NaN	-1.84641	-1.51668	-0.805573	-1.57852	-1.58674	-1.42863	-1.42332	-1.07536	-1.41027	NaN	-1.27871	-1.69212	-1.74735	-1.44897	-0.723319	-1.77261	-1.45606	-0.773373	-1.51543	-1.37153	-1.36643	-1.3539	-1.83702
NaN	NaN	NaN	-0.0445564	0.301493	-0.638086	-0.912441	0.806887	-1.30797	-0.00439616	0.582259	0.686024	0.32286	0.518117	0.0293104	0.231099	-0.294241	-0.0599331	NaN	-0.0855004	0.563957	-0.129924	-0.243557	0.760549	NaN	NaN	NaN	NaN	-0.0473511	-0.678108	-0.969672	0.787682	-1.39001	-0.0046719	0.5684	0.315176	NaN	-0.0908632	0.550534	-0.138073	-0.258833	NaN	NaN	-0.0454584	-0.651003	-0.930912	-1.33445	-0.00448515	0.344333	-0.0611464
1.44507	1.28488	0.557076	NaN	1.30461	-0.682556	-0.314503	2.07092	-1.33604	0.733377	1.87059	1.13781	1.0867	0.961414	0.64492	1.64051	0.0662936	0.842688	0.728402	0.359279	1.33578	NaN	-0.112429	1.373	2.1994	0.751218	1.41067	0.543817	NaN	-0.725369	-0.33423	2.02163	-1.41984	0.715921	1.82607	1.06083	0.711066	0.350727	1.30399	NaN	-0.119481	0.733338	0.594126	NaN	-0.696374	-0.32087	-1.36309	0.782151	1.15897	0.898733
NaN	-3.03435	-2.06723	-3.83766	-4.44513	-1.75965	NaN	NaN	-0.499325	-3.786	-2.70124	-2.28922	-3.44332	-2.79634	-2.52529	-1.49228	NaN	-3.26676	-2.40358	-3.21681	-3.56375	NaN	-1.69794	-2.25171	-2.51943	-2.52855	NaN	-2.19689	-4.07837	-1.87002	NaN	NaN	-0.530644	-4.02347	-2.87067	-3.65929	-2.55434	-3.41857	-3.78728	NaN	-1.80444	-2.68715	-2.10908	-3.91535	-1.79527	NaN	-0.509433	-3.86265	-3.51302	-3.3329
NaN	-0.668261	-0.52817	-0.431383	-0.483803	-0.903877	-0.613485	-0.397446	-0.891824	0.0767166	-0.393727	-1.24494	-0.68253	-1.16909	-0.441908	-0.98943	-1.39195	-0.544408	0.100323	-0.575302	-0.0377778	NaN	-0.616803	-0.838222	-0.0319015	-0.465508	NaN	-0.561298	-0.45844	-0.960571	-0.651965	-0.422375	-0.947762	0.0748907	-0.418423	-0.72534	0.0979348	-0.611386	-0.0401473	NaN	-0.655491	-0.494706	-0.538862	-0.440116	-0.922176	-0.625905	-0.909878	0.0818188	-0.696347	-0.555429
0.759261	-0.422438	0.00331414	-0.292228	0.327345	0.894645	0.479619	-0.709929	-0.173011	-0.260626	0.39659	0.00283898	-0.313642	0.0931903	0.363642	0.241912	0.137348	-0.145891	0.199378	-0.391189	-0.229013	-0.177296	-0.218841	-0.0171728	0.232929	0.536502	0.741189	0.00323526	-0.310558	0.873351	0.468203	-0.754458	-0.183863	-0.276974	0.387151	-0.333314	0.194632	-0.415725	-0.243378	-0.188417	-0.232567	0.523732	0.00353455	-0.298144	0.954145	0.511517	-0.176513	-0.265903	-0.319991	-0.148845
0.519495	-0.000394839	0.207073	-0.177878	0.235938	0.376933	-0.0237277	-0.658826	-0.148822	-0.158267	0.152118	-0.825115	-0.260624	-0.113043	0.130382	0.321608	0.0546601	-0.391416	-0.326566	-0.14801	-0.438314	-0.309358	-0.0467931	0.0276365	0.0904262	-0.0763779	0.50713	0.202144	-0.189035	0.367961	-0.025216	-0.70015	-0.158156	-0.168194	0.148498	-0.276971	-0.347049	-0.157293	-0.465807	-0.328762	-0.0497282	-0.0811686	0.220844	-0.181479	0.402001	-0.0242081	-0.151834	-0.161471	-0.2659	-0.39934
NaN	0.574383	0.608056	1.56558	0.989614	0.691815	0.501859	0.331925	1.47486	0.690047	0.0122061	1.59535	1.00404	0.0808534	0.539957	-0.0217272	0.274912	0.916767	NaN	1.19269	0.709098	NaN	1.43154	0.822328	0.966853	1.10424	NaN	0.593583	1.52832	0.675349	0.489914	0.324025	1.43976	0.673623	0.0119156	0.980143	NaN	1.1643	0.692221	NaN	1.39746	1.07796	0.648496	1.6697	0.737826	0.535236	1.57295	0.73594	1.07082	0.977738
NaN	0.441826	2.15717	NaN	0.888183	1.46951	1.5195	0.36109	1.05865	0.413023	0.79313	0.126074	NaN	0.972805	0.593076	1.37311	1.85468	NaN	0.98872	1.03414	NaN	NaN	1.17929	1.18944	1.16714	NaN	NaN	2.10583	NaN	1.43454	1.48334	0.352496	1.03346	0.403193	0.774253	NaN	0.965187	1.00953	NaN	NaN	1.15122	NaN	2.30064	NaN	1.56725	1.62056	1.12906	0.440492	NaN	NaN
NaN	2.82441	2.37194	2.65357	4.93486	4.06621	4.73612	2.79962	3.97902	1.54885	3.10414	3.57098	3.74709	3.44995	2.88158	1.95448	5.56324	0.910361	3.44545	2.38354	2.96712	3.70255	3.20746	3.70954	3.34432	3.08832	NaN	2.31548	2.59041	3.96942	4.62339	2.73299	3.88431	1.51198	3.03025	3.6579	3.36345	2.32681	2.8965	3.61442	3.13112	3.01482	2.52969	2.83005	4.33664	5.0511	4.24365	1.65186	3.9963	0.970906
NaN	NaN	0.88957	NaN	0.832942	0.766439	0.554641	0.022245	NaN	0.165055	1.27588	0.265735	NaN	0.22032	0.253778	0.590526	0.415075	NaN	NaN	0.162998	NaN	NaN	0.443701	0.143991	NaN	NaN	NaN	0.868397	NaN	0.748197	0.54144	0.0217155	NaN	0.161126	1.24551	NaN	NaN	0.159118	NaN	NaN	0.43314	NaN	0.948733	NaN	0.817413	0.591529	NaN	0.176032	NaN	NaN
1.03646	0.522538	0.901263	0.232604	1.20231	1.14103	0.725908	0.276724	0.26434	0.29426	1.41125	0.379457	0.284467	0.475697	0.61985	0.975975	0.784674	0.221251	NaN	0.598646	0.36903	0.265871	0.703976	0.346794	NaN	0.635497	1.01179	0.879812	0.227067	1.11387	0.70863	0.270137	0.258048	0.287256	1.37766	0.277696	NaN	0.584397	0.360247	0.259543	0.68722	0.620372	0.961204	0.248074	1.21692	0.774186	0.28192	0.31383	0.303386	0.235966
0.596596	0.7922	NaN	NaN	1.09818	0.882555	1.11712	0.267378	0.974978	NaN	1.39941	0.57679	NaN	0.16514	NaN	0.715657	0.60969	0.29726	NaN	0.255669	0.368791	NaN	0.614412	NaN	0.996269	NaN	0.582397	NaN	NaN	0.861549	1.09053	0.261014	0.951772	NaN	1.3661	NaN	NaN	0.249584	0.360014	NaN	0.599788	NaN	NaN	NaN	0.941251	1.19141	1.03982	NaN	NaN	0.31703
0.527599	0.453044	0.934556	0.401007	0.947731	0.890481	0.739945	0.196071	-0.0731917	0.160187	1.19345	0.282241	0.0152982	0.293242	0.381163	0.686703	-0.218611	-0.0743903	1.0319	0.380581	0.732991	0.453174	0.408949	0.155332	0.574357	0.706294	0.515041	0.912312	0.391463	0.869287	0.722333	0.191404	-0.0777825	0.156375	1.16504	0.0149341	1.00734	0.371523	0.715544	0.442388	0.399215	0.689484	0.996711	0.427677	0.949705	0.789157	-0.0746734	0.170841	0.0163156	-0.0758963
NaN	1.4266	-0.907697	0.37676	-0.100247	-0.617326	NaN	1.66021	-0.0948862	NaN	0.668416	1.47313	1.55617	1.99329	1.11078	0.319322	NaN	1.60488	NaN	1.24089	1.17711	1.31509	0.840922	0.89148	0.631228	0.57183	NaN	-0.964631	0.367792	-0.656047	NaN	1.6207	-0.100838	NaN	0.652507	1.51913	NaN	1.21135	1.14909	1.28379	0.820907	0.558219	-0.926073	0.401817	-0.629823	NaN	-0.0968071	NaN	1.65966	1.71162
NaN	-0.815014	-0.980143	-0.515749	-1.23411	-1.39502	-3.20953	-0.429581	-0.404799	-0.809515	-1.6689	-0.0695109	-0.657187	-0.618163	-0.805048	-0.861721	NaN	-0.423446	-2.00842	-0.85973	-0.815716	-0.550248	-0.886383	-1.41354	-1.18884	-0.31868	NaN	-1.04162	-0.548098	-1.48252	-3.41084	-0.456526	-0.430189	-0.86029	-1.77358	-0.698407	-2.13439	-0.913655	-0.86688	-0.584762	-0.94198	-0.338669	-0.999986	-0.52619	-1.42326	-3.2745	-0.412994	-0.825903	-0.670491	-0.432019
NaN	-1.08555	-1.32094	-0.867534	-0.931181	-1.09675	-2.08175	-0.651921	-0.699356	-0.813901	-1.42934	-0.552104	-0.63852	-0.563278	-1.11199	-1.29443	-0.734598	-0.635408	-1.56474	-0.563967	-0.927754	-0.999636	-0.917726	-1.14603	-1.14343	-0.785592	NaN	-1.40379	-0.921948	-1.16554	-2.21232	-0.692811	-0.743222	-0.864951	-1.51899	-0.67857	-1.66289	-0.599341	-0.985945	-1.06234	-0.975288	-0.834867	-1.34768	-0.885096	-1.11895	-2.12389	-0.713514	-0.830377	-0.651446	-0.648271
-1.53614	-0.709371	-1.14368	-0.692744	-0.406117	-0.532922	-0.552485	-0.390045	-0.61423	-0.605557	-0.989194	-0.306087	-0.585492	-0.484688	-1.05041	-1.18408	-0.904046	-0.512061	-0.656051	-0.370693	-0.605787	-1.00887	-0.637636	-0.985417	-0.728438	-0.619038	-1.63249	-1.21541	-0.736195	-0.566348	-0.587139	-0.41451	-0.652757	-0.64354	-1.05124	-0.622216	-0.697201	-0.393944	-0.643784	-1.07215	-0.677631	-0.657866	-1.16683	-0.706768	-0.54371	-0.56367	-0.626665	-0.617816	-0.597345	-0.522427
NaN	2.17985	NaN	2.63511	2.36242	-0.564141	2.10187	2.63054	1.6714	2.51584	1.57876	2.21281	2.66629	3.00953	NaN	0.475585	1.90462	2.78051	1.85414	2.95703	2.68375	2.83437	1.66287	NaN	2.24265	2.55198	NaN	NaN	2.57239	-0.599526	2.05184	2.56793	1.63161	2.45596	1.54118	2.60283	1.81001	2.88664	2.61988	2.76691	1.62329	2.49124	NaN	2.81036	-0.575562	2.24166	1.78256	2.68316	2.84362	2.96543
NaN	0.466316	1.51181	0.419118	0.113158	NaN	-0.283682	0.691017	0.584055	0.328851	0.103203	0.797359	0.731753	0.518271	0.920172	0.859385	0.350915	NaN	NaN	0.452721	0.539372	0.398776	-0.0128129	NaN	0.977651	0.939403	NaN	1.47582	0.409142	NaN	-0.301475	0.67457	0.570154	0.321024	0.100747	0.714336	NaN	0.441945	0.526534	0.389285	-0.0136165	0.917044	1.61235	0.446992	NaN	-0.289425	0.622899	0.350722	0.780419	NaN
NaN	1.15758	-0.181468	-0.354951	0.330104	NaN	-0.044872	0.0961899	0.554216	0.402534	0.336294	0.825791	0.67958	1.07661	0.901026	0.701324	NaN	0.82508	NaN	0.263022	0.0037212	0.639931	-0.226484	0.672341	NaN	0.95898	NaN	-0.192851	-0.377214	NaN	-0.0476866	0.0939004	0.541025	0.392953	0.32829	0.663405	NaN	0.256762	0.00363263	0.6247	-0.240689	0.936155	-0.185142	-0.362136	NaN	-0.0457804	0.591075	0.429305	0.724777	0.879953
NaN	-0.729457	-0.11625	0.588799	NaN	-0.685279	NaN	0.178394	0.475923	0.671074	0.0598904	0.222539	0.563352	0.0914374	-0.838878	-1.06013	NaN	0.713431	NaN	0.386141	0.555977	NaN	0.165666	-0.0475936	NaN	-0.194247	NaN	-0.123542	0.574785	-0.728262	NaN	0.174148	0.464595	0.655102	0.0584649	0.549944	NaN	0.37695	0.542744	NaN	0.161723	-0.206431	-0.118603	0.627959	-0.699152	NaN	0.507575	0.715705	0.600819	0.760879
NaN	0.723422	NaN	1.51595	1.18096	NaN	NaN	1.48905	1.47117	1.69885	1.31491	1.46119	1.96665	1.31044	0.532917	-1.03359	0.629902	1.99749	NaN	1.53608	1.28546	2.07865	0.952169	1.52837	NaN	2.23758	NaN	NaN	1.47987	NaN	NaN	1.45361	1.43615	1.65841	1.28361	1.91985	NaN	1.49952	1.25486	2.02918	0.929506	2.18432	NaN	1.61677	NaN	NaN	1.56901	1.81183	2.09745	2.13034
NaN	1.22842	-0.711123	-0.115285	-0.463901	-1.9935	-0.382478	0.536576	-0.513344	1.31348	-1.88364	0.0911041	0.362913	0.366487	0.526167	-0.262831	-0.159919	1.21383	NaN	0.777134	0.981698	0.00353379	-0.667694	-0.257361	NaN	-0.595032	NaN	-0.755727	-0.122516	-2.11854	-0.406469	0.523805	-0.545543	1.28222	-2.00178	0.354275	NaN	0.758637	0.958332	0.00344968	-0.709574	-0.632354	-0.72552	-0.117619	-2.03386	-0.390221	-0.523737	1.40084	0.387049	1.29456
NaN	-1.17661	-0.605379	NaN	-1.00442	0.748246	NaN	-0.315504	0.240098	0.922097	-0.183309	-0.602483	-0.994765	NaN	-0.493163	-1.08098	NaN	NaN	NaN	NaN	NaN	NaN	-0.520047	-0.302645	NaN	-0.368047	NaN	-0.643351	NaN	0.730437	NaN	-0.335294	0.234384	0.900149	-0.194807	-1.05716	NaN	NaN	NaN	NaN	-0.552666	-0.391132	-0.617635	NaN	0.79801	NaN	0.256067	0.983422	-1.0149	NaN
NaN	NaN	NaN	1.88512	1.83429	NaN	2.2382	2.44098	1.66403	1.7539	2.62489	2.49007	2.61616	2.65183	NaN	1.88293	NaN	NaN	NaN	1.61626	2.00715	NaN	1.91996	2.73586	1.74036	NaN	NaN	NaN	1.84026	NaN	2.18493	2.38289	1.62443	1.71215	2.56241	2.55389	NaN	1.57779	1.95938	NaN	1.87426	NaN	NaN	2.0105	NaN	2.38706	1.7747	1.87054	2.79015	NaN
NaN	NaN	NaN	0.795162	-0.209631	NaN	NaN	0.289363	0.777752	0.573098	0.981121	NaN	0.665951	0.628624	0.600817	0.70063	NaN	0.252138	NaN	0.602555	NaN	NaN	0.91334	1.22844	NaN	NaN	NaN	NaN	0.776237	NaN	NaN	0.282475	0.75924	0.559457	0.957769	0.6501	NaN	0.588213	NaN	NaN	0.891601	NaN	NaN	0.848046	NaN	NaN	0.829478	0.611213	0.710241	0.268907
NaN	NaN	-2.53522	NaN	-2.95446	NaN	NaN	-0.931648	-0.823957	-0.356567	-2.90945	-3.16331	-2.01278	-2.48165	-1.90196	-3.05575	NaN	-1.94372	-0.467017	-1.9287	NaN	NaN	NaN	-4.01757	-2.52871	NaN	NaN	-2.69423	NaN	NaN	NaN	-0.990084	-0.875638	-0.378932	-3.09194	-2.13903	-0.49631	-2.04967	NaN	NaN	NaN	NaN	-2.58654	NaN	NaN	NaN	-0.840637	-0.363785	-2.05353	-1.98306
NaN	1.46803	NaN	0.516316	NaN	NaN	1.57656	NaN	1.21679	1.19382	0.824714	1.07135	1.43928	1.27189	1.02082	0.510228	0.362869	NaN	0.563791	1.36119	NaN	NaN	0.721863	NaN	0.920012	1.05611	NaN	NaN	0.504027	NaN	1.53903	NaN	1.18783	1.16541	0.805085	1.40503	0.550372	1.32879	NaN	NaN	0.704682	1.03097	NaN	0.550654	NaN	1.68141	1.29772	1.27322	1.535	NaN
NaN	1.85857	0.109319	0.618794	0.907214	-1.39008	0.61273	1.48182	-0.349261	1.3778	1.56826	1.2407	1.80651	NaN	NaN	1.43589	0.00477573	1.92457	NaN	NaN	1.39014	2.01941	0.136225	0.062563	1.49856	0.326875	NaN	0.106717	0.604066	-1.47727	0.598146	1.44655	-0.371167	1.34501	1.53093	1.76351	NaN	NaN	1.35705	1.97134	0.132983	0.319095	0.11659	0.659948	-1.41822	0.65348	-0.356331	1.46943	1.92666	2.05257
NaN	0.482309	0.852593	NaN	-0.256935	NaN	-0.743375	-0.239838	-0.837679	-0.162237	-0.382403	-0.138523	0.392862	-0.323948	0.352314	0.419128	NaN	-0.452679	-0.71926	0.11467	0.115728	NaN	-0.724401	0.0172192	0.83601	0.424031	NaN	0.8323	NaN	NaN	-0.790002	-0.254882	-0.890221	-0.172413	-0.406389	0.383511	-0.764374	0.111941	0.112974	NaN	-0.769838	0.413938	0.909297	NaN	NaN	-0.758424	-0.854638	-0.165521	0.41899	-0.461843
NaN	-0.183498	NaN	-0.426992	-1.02869	1.01602	-0.0183183	-0.609259	-0.00184303	-0.500113	-0.192551	0.0691122	-0.355431	0.0142003	NaN	NaN	0.275058	-0.0173295	-0.405876	-0.300421	-0.507996	NaN	-0.322857	0.155332	-0.472638	-0.01895	NaN	NaN	-0.453774	0.991836	-0.0194673	-0.647474	-0.00195863	-0.531482	-0.204629	-0.377725	-0.431333	-0.319265	-0.539859	NaN	-0.343107	-0.0201386	NaN	-0.435636	1.08359	-0.0186891	-0.00188034	-0.510238	-0.362627	-0.0176803
-0.285692	-0.880339	-0.341563	-0.38628	-0.141795	0.825269	-0.0907299	-0.738392	0.230315	-0.649372	0.0711492	-0.658243	-1.06149	-0.0253066	-0.165544	0.160166	-0.606408	-0.477527	-0.12972	-0.572213	-0.558589	-0.447715	-0.155623	-0.197809	-0.0573717	-0.190441	-0.303612	-0.362986	-0.410509	0.805627	-0.0964208	-0.784706	0.224833	-0.690102	0.0694558	-1.12807	-0.137856	-0.608104	-0.593625	-0.475797	-0.165385	-0.202386	-0.348477	-0.3941	0.880155	-0.0925667	0.245632	-0.662518	-1.08297	-0.487195
NaN	0.651427	-1.21295	0.920667	1.78931	-0.995938	1.08375	1.27039	0.665694	1.5372	0.700694	1.0468	NaN	1.59371	0.698332	-0.793812	0.939888	1.83395	1.18812	1.38745	1.24501	1.90272	NaN	0.208356	NaN	1.87399	NaN	-1.28903	0.898754	-1.05841	1.05795	1.24015	0.649849	1.50061	0.684017	NaN	1.15984	1.35442	1.21537	1.85743	NaN	1.82939	-1.2375	0.981898	-1.0161	1.15582	0.709967	1.63943	NaN	1.95592
0.0241063	0.234726	-0.476479	-0.724132	0.569266	NaN	-0.460865	NaN	-0.807098	0.100954	-0.1076	-0.28967	0.062799	0.493389	-0.20445	NaN	-0.108042	-0.0459951	-0.670411	0.161099	NaN	-0.439693	-1.00433	NaN	NaN	0.180036	0.0235325	-0.506366	-0.769552	NaN	-0.489772	NaN	-0.857722	0.0985507	-0.114349	0.0613043	-0.712462	0.157265	NaN	-0.467272	-1.06733	0.175751	-0.486125	-0.738792	NaN	-0.470195	-0.823437	0.107668	0.0669756	-0.0469263
NaN	0.188769	NaN	1.06333	-0.444687	0.888893	1.4118	-0.0153862	1.22233	0.163611	-0.148137	-0.430925	0.714626	0.922661	-0.00982131	0.274922	NaN	0.501192	0.844915	1.15354	0.378177	NaN	1.38583	1.33849	0.335509	0.743307	NaN	NaN	1.03802	0.867736	1.37819	-0.0163513	1.19323	0.159717	-0.157429	0.697617	0.824805	1.12608	0.369176	NaN	1.35284	0.725615	NaN	1.13404	0.948011	1.50569	1.30362	0.174492	0.762154	0.534525
1.1698	0.512934	NaN	3.33737	0.290642	NaN	-0.274665	0.676372	1.18604	0.627698	-0.293139	-0.101511	0.648258	-0.220584	0.429564	0.372592	NaN	0.561877	0.218687	0.372855	NaN	0.597087	0.553533	6.83814	0.928195	0.701113	1.14196	NaN	3.25793	NaN	-0.291892	0.660273	1.15781	0.612758	-0.311525	0.632828	0.213482	0.363981	NaN	0.582875	0.540359	0.684426	NaN	3.55933	NaN	-0.280225	1.26492	0.669444	0.691372	0.599246
NaN	1.28942	0.499558	0.604304	2.04529	-1.16588	NaN	1.50347	-0.146955	NaN	0.850927	NaN	1.03272	0.923043	0.825916	0.919133	NaN	1.56071	NaN	1.43567	2.37905	2.01675	NaN	-0.206425	1.29044	1.70809	NaN	0.487668	0.58992	-1.23901	NaN	1.46768	-0.156173	NaN	0.830673	1.00814	NaN	1.4015	2.32242	1.96875	NaN	1.66743	0.532782	0.644494	-1.18949	NaN	-0.14993	NaN	1.10141	1.66451
NaN	2.26705	1.02659	0.88459	2.75722	NaN	1.48326	2.24213	-0.174703	1.872	1.69752	2.46066	2.319	0.430573	1.84476	1.31207	-0.497786	2.26497	1.57358	2.21138	2.37041	1.90941	-0.354539	0.635185	2.64482	1.84524	NaN	1.00215	0.863535	NaN	1.44796	2.18876	-0.185661	1.82745	1.65712	2.26381	1.53613	2.15875	2.31399	1.86396	-0.376777	1.80132	1.09486	0.943421	NaN	1.58191	-0.17824	1.99651	2.47323	2.41561
NaN	3.03428	0.260114	-0.530865	2.49074	-0.827309	0.713133	1.41499	-2.39406	1.96658	0.377732	2.70692	2.6426	1.21655	NaN	2.48324	NaN	2.20096	-0.399582	1.20023	2.35248	NaN	NaN	NaN	NaN	1.6272	NaN	0.253923	-0.564163	-0.879201	0.696159	1.38131	-2.54423	1.91977	0.368742	2.5797	-0.424645	1.17167	2.29649	NaN	NaN	1.58847	0.277413	-0.541612	-0.844058	0.760561	-2.44253	2.09737	2.81835	2.34734
NaN	0.204187	NaN	-0.189034	0.501971	NaN	0.253524	0.11196	0.522222	-0.00984816	-0.188929	0.0673869	-0.043407	0.476872	0.2153	0.236575	-1.50208	0.0392003	NaN	0.0559638	0.491524	NaN	NaN	0.160978	NaN	0.388904	NaN	NaN	-0.20089	NaN	0.24749	0.109296	0.509793	-0.0104659	-0.200779	-0.0461297	NaN	0.0546318	0.479825	NaN	NaN	0.379647	NaN	-0.19286	NaN	0.270385	0.556954	-0.0100475	-0.0442858	0.0418074
NaN	1.46538	NaN	-0.55299	0.614496	-0.548337	NaN	0.310623	0.372975	NaN	NaN	-0.287664	1.58535	0.21792	0.690349	0.244064	-0.407295	NaN	NaN	0.06489	NaN	-0.0864713	-0.538808	-0.110169	0.351525	0.233606	NaN	NaN	-0.587675	-0.58273	NaN	0.30323	0.364098	NaN	NaN	1.54762	NaN	0.0633455	NaN	-0.091895	-0.572604	0.228045	NaN	-0.564184	-0.559438	NaN	0.39778	NaN	1.69079	NaN
-0.0120706	-0.127126	-0.907846	1.13586	-0.0687038	-0.312615	0.0272355	-0.219618	0.206334	0.651965	-0.100417	-1.1364	1.72487	0.423127	0.663642	0.557881	-0.104294	0.395271	NaN	0.323196	0.398765	0.358489	-0.2203	0.409014	NaN	0.162393	-0.0128277	-0.964789	1.10882	-0.332224	0.0265873	-0.233393	0.201423	0.636447	-0.106716	1.68381	NaN	0.315504	0.389274	0.349957	-0.234118	0.158528	-0.926225	1.2114	-0.318944	0.0290469	0.220057	0.695325	1.83958	0.42156
1.60476	0.143146	1.48597	0.568668	0.141667	1.25327	0.581459	0.526042	0.663961	0.149314	0.799664	-0.0731271	-0.101696	NaN	0.0397462	0.775698	0.868357	0.00410287	1.56662	NaN	0.783668	0.81034	0.791293	1.03411	NaN	0.815341	1.56656	1.45061	0.555133	1.22344	0.567619	0.513521	0.648158	0.14576	0.780631	-0.108074	1.52933	NaN	0.765016	0.791053	0.772459	0.795934	1.5848	0.606488	1.33663	0.62013	0.708119	0.159245	-0.103754	0.00437574
-0.927444	-0.836922	0.0728876	-0.688003	-0.228595	0.205544	-0.303287	-0.246743	-0.68703	-0.960589	0.64858	-0.896176	-0.290167	-1.34161	-0.557199	-0.22751	-0.584298	-1.04986	0.202208	-0.753573	-0.247077	-1.21225	-0.420024	-0.254773	-0.220781	-0.287444	-0.985616	0.0711528	-0.731156	0.200651	-0.322311	-0.262219	-0.730123	-1.02084	0.633143	-0.308368	0.197395	-0.800839	-0.262574	-1.28828	-0.446369	-0.305474	0.0777352	-0.701931	0.219214	-0.309427	-0.700938	-0.980035	-0.296042	-1.07111
NaN	-0.222262	-1.75451	-0.361011	-0.837399	-1.22285	NaN	-0.4525	-0.474775	-0.845554	-1.40885	0.562951	-0.0611167	-1.31479	-0.961396	-1.71368	-1.02151	-0.396257	NaN	-0.151109	NaN	-0.555283	-1.34135	-1.28899	NaN	-1.15646	NaN	-1.86456	-0.383655	-1.29955	NaN	-0.480882	-0.504554	-0.89859	-1.49721	-0.0649502	NaN	-0.160587	NaN	-0.590112	-1.42548	-1.229	-1.79003	-0.368319	-1.24761	NaN	-0.484386	-0.862672	-0.062354	-0.404279
NaN	-0.720462	-1.40986	-0.486203	-0.957814	-0.722277	-1.11369	-1.65382	-0.389807	-0.401127	-1.66357	-1.27666	-1.07468	-0.97993	-1.07269	-0.993082	-0.74664	-0.959391	-1.8194	-1.02766	-1.25494	-0.72633	-0.2426	-1.0844	-1.27048	-1.01959	NaN	-1.49829	-0.5167	-0.767581	-1.18355	-1.75755	-0.414256	-0.426286	-1.76792	-1.14208	-1.93352	-1.09211	-1.33366	-0.771887	-0.257817	-1.08354	-1.4384	-0.496046	-0.736899	-1.13624	-0.397698	-0.409247	-1.09643	-0.978813
-1.54591	-1.18137	-1.38297	-0.475132	-2.00451	-0.716802	-0.813693	-1.19853	-0.252632	-0.641306	-1.8003	0.26637	-0.454312	-0.536436	-1.68083	-1.2557	-0.69914	-0.0791094	NaN	-0.383092	-1.13134	-0.32198	-0.141031	-0.740108	NaN	-0.732232	-1.64287	-1.46971	-0.504934	-0.761762	-0.864731	-1.27371	-0.268478	-0.68153	-1.91322	-0.482808	NaN	-0.407121	-1.2023	-0.342176	-0.149877	-0.77816	-1.41097	-0.484751	-0.731313	-0.830166	-0.257746	-0.654288	-0.463509	-0.0807109
NaN	-0.261836	-0.410364	-1.05965	-0.431035	-0.676577	NaN	-0.013307	-0.642585	0.0475509	-0.699828	0.0807304	0.182722	-0.430335	-0.756629	-0.94406	NaN	NaN	NaN	0.112562	-0.188689	0.252715	-0.986979	-0.89866	-1.04734	-0.376693	NaN	-0.436104	-1.12612	-0.719014	NaN	-0.0141416	-0.68289	0.0464191	-0.743724	0.178373	NaN	0.109883	-0.200524	0.2467	-1.04889	-0.40032	-0.418672	-1.0811	-0.690274	NaN	-0.655594	0.0507133	0.194874	NaN
-2.102	-0.829404	-1.49164	-1.48491	-0.990436	-1.44457	-1.10956	-0.246392	-0.882939	-1.4281	-1.54419	-0.299049	-0.443477	-0.897708	-1.96345	-1.33337	-1.63092	-0.37918	-1.33546	-0.675614	-1.36121	-1.63733	-1.75526	-1.95176	-2.11488	-1.6455	-2.23384	-1.5852	-1.57805	-1.53518	-1.17915	-0.261847	-0.93832	-1.51767	-1.64104	-0.471294	-1.41922	-0.71799	-1.44659	-1.74002	-1.86536	-1.74871	-1.52183	-1.51497	-1.47381	-1.13202	-0.900813	-1.45701	-0.452455	-0.386856
-0.824734	NaN	NaN	-1.60832	-0.582177	-1.44692	NaN	-0.43656	NaN	-1.0999	NaN	0.498045	-0.331585	-0.250692	-0.599066	NaN	-1.26315	-0.364313	NaN	-0.389144	NaN	NaN	-1.99441	-2.63257	-0.991511	-0.817664	-0.876464	NaN	-1.7092	-1.53768	NaN	-0.463942	NaN	-1.16889	NaN	-0.352383	NaN	-0.413552	NaN	NaN	-2.11951	-0.86895	NaN	-1.64088	-1.47621	NaN	NaN	-1.12217	-0.338298	-0.371688
-0.963134	NaN	NaN	-0.134784	NaN	-0.361236	0.282371	-1.97746	-1.24145	-0.223642	-0.961072	-1.86582	-1.77349	-2.0983	-0.801489	-0.281808	-1.23455	-1.40074	-1.0648	-2.07011	-0.756596	NaN	-0.797024	NaN	-0.0603065	NaN	-1.02355	NaN	-0.143238	-0.383894	0.27565	-2.10149	-1.31932	-0.237669	-1.02135	-1.88473	-1.13159	-2.19995	-0.804052	NaN	-0.847015	NaN	NaN	-0.137513	-0.368549	0.30115	-1.26659	-0.228169	-1.8094	-1.4291
NaN	NaN	0.322881	-0.610158	-0.335574	2.07592	1.82994	0.282616	NaN	NaN	-0.34586	-2.06511	NaN	0.210711	-2.01598	-0.191406	NaN	NaN	NaN	NaN	0.640537	NaN	NaN	2.40001	NaN	-1.95094	NaN	0.315196	-0.648429	2.02651	1.78638	0.275889	NaN	NaN	-0.367553	NaN	NaN	NaN	0.625291	NaN	NaN	-2.07331	0.344355	-0.62251	2.21398	1.95164	NaN	NaN	NaN	NaN
NaN	NaN	1.02903	0.423572	0.56975	NaN	NaN	0.204084	0.151589	0.0636417	0.376304	-0.266841	0.425779	0.23862	0.0043077	0.327191	-0.519076	-0.251384	NaN	0.0854739	0	0.0858657	NaN	0.276719	0.302784	-0.0513675	NaN	1.00454	0.41349	NaN	NaN	0.199226	0.147981	0.0621269	0.367347	0.415644	NaN	0.0834395	0	0.0838219	NaN	-0.0545894	1.09747	0.451742	NaN	NaN	0.16167	0.0678743	0.454096	-0.256473
NaN	-0.218715	0.331315	NaN	0.236581	0.693344	0.238901	-0.491853	-0.186075	-0.366622	-0.0354694	-0.389258	-0.122798	-0.523613	-0.270044	0.0500585	-0.494295	-0.368309	0.291169	-0.0517986	-0.154839	-0.183233	0.12958	0.00352882	-0.0126729	-0.24926	NaN	0.323429	NaN	0.676842	0.233215	-0.522704	-0.197747	-0.389618	-0.0376941	-0.1305	0.284239	-0.0550475	-0.164551	-0.194725	0.126496	-0.264895	0.353349	NaN	0.739457	0.254789	-0.189842	-0.374044	-0.125284	-0.375765
NaN	1.29359	1.04673	1.16538	0.473144	0.581116	1.22217	0.400543	0.0291442	1.31034	1.10928	0.534234	-0.168717	-0.680463	1.3574	1.07108	-0.642773	0.572016	1.03173	0.204361	1.1862	0.222753	0.661471	0.240851	1.83469	-0.0935623	NaN	1.02182	1.13764	0.567285	1.19308	0.39101	0.0284505	1.27915	1.08288	-0.1793	1.00717	0.199497	1.15796	0.217452	0.645727	-0.0994309	1.11635	1.24288	0.619765	1.30345	0.0310825	1.39748	-0.172133	0.610059
NaN	0.480992	1.06674	0.606557	1.1135	NaN	NaN	0.375745	0.878179	0.476909	1.09489	0.31144	1.04306	0.891556	0.743492	0.89387	NaN	0.546172	NaN	0.613708	0.40405	0.901461	0.90378	1.04217	0.16123	1.02837	NaN	1.04135	0.59212	NaN	NaN	0.366802	0.857277	0.465558	1.06883	1.01823	NaN	0.599101	0.394433	0.880005	0.882269	1.0039	1.13769	0.646897	NaN	NaN	0.936584	0.508627	1.11243	0.582496
NaN	-0.214162	-0.294568	-4.54314	-1.08521	-3.67906	-0.845037	-2.97213	-0.377479	-3.54971	-1.2588	-4.50223	-6.09837	-0.981817	-4.80988	-0.0758966	-4.72653	-6.68773	-2.98055	-0.80756	-1.20099	NaN	-5.60367	0.514686	-5.01687	-5.91614	NaN	-0.313044	-4.8281	-3.90982	-0.89804	-3.15855	-0.401156	-3.77236	-1.33776	-6.48088	-3.1675	-0.858213	-1.27632	NaN	-5.95515	-6.28722	-0.300531	-4.63511	-3.75354	-0.862144	-0.385121	-3.62157	-6.22183	-6.82312
-0.281572	-0.920311	0.177233	-0.722786	-0.74549	-0.869399	-0.750136	-1.65958	-0.421423	-1.08373	-0.890302	-0.207108	-0.800291	-1.0739	-1.04943	-1.0485	-1.25258	-0.686691	-1.17756	-0.670642	-0.748998	-0.86903	-0.755709	-0.440845	-0.554385	-0.434778	-0.299233	0.173015	-0.768122	-0.923931	-0.797187	-1.76368	-0.447856	-1.1517	-0.946145	-0.850488	-1.25142	-0.712707	-0.795977	-0.923538	-0.80311	-0.462049	0.18902	-0.737419	-0.887	-0.765322	-0.429954	-1.10567	-0.816493	-0.700592
1.18849	-0.856756	0.722664	0.00821819	-0.218528	-0.665825	-0.65553	-0.563963	0.20234	-0.627887	-0.518145	0.653604	-0.16373	-0.395803	-0.484823	-0.743212	-0.472524	-0.0600308	1.8597	-0.0247747	-0.145306	-0.183233	-0.421916	0.0838382	-0.165455	0.200973	1.1602	0.705463	0.00802259	-0.707588	-0.696647	-0.599336	0.197524	-0.66727	-0.550645	-0.174	1.81544	-0.0263286	-0.15442	-0.194725	-0.44838	0.19619	0.770726	0.00876476	-0.679304	-0.6688	0.215797	-0.640598	-0.167045	-0.061246
NaN	NaN	0.141893	1.03915	-1.35139	-2.44747	NaN	-0.734868	-1.19098	NaN	-1.75579	1.69048	-1.61343	-1.37662	0.449868	NaN	0.19258	-0.852212	-0.561157	NaN	0.887763	-0.334748	NaN	-0.322435	NaN	-0.674887	NaN	0.138516	1.01442	-2.60098	NaN	-0.780961	-1.26568	NaN	-1.86592	-1.71463	-0.596355	NaN	0.866633	-0.355744	NaN	-0.717218	0.15133	1.10827	-2.49701	NaN	-1.21509	NaN	-1.64609	-0.869465
NaN	2.45326	0.6239	NaN	1.20373	-0.500352	1.19477	2.06393	0.930848	1.81374	1.75627	2.24887	NaN	2.41934	2.14035	0.276112	1.894	1.93897	0.756665	2.11733	1.83013	NaN	0.962565	0.423906	1.83842	1.18825	NaN	0.60905	NaN	-0.531736	1.16633	2.01481	0.908692	1.77057	1.71447	NaN	0.738655	2.06694	1.78657	NaN	0.939655	1.15997	0.665393	NaN	-0.510481	1.27423	0.992756	1.93436	NaN	2.06792
NaN	-0.846826	-0.250004	NaN	-0.607354	0.663537	NaN	NaN	-0.2569	-0.750455	-0.116724	-0.588688	-0.831198	-0.708577	-0.477841	-0.118504	NaN	-0.794353	-0.590944	-1.13899	NaN	NaN	-0.289161	-0.08728	-0.578221	-0.325021	NaN	-0.265685	NaN	0.647744	NaN	NaN	-0.273014	-0.797526	-0.124045	-0.883333	-0.62801	-1.21043	NaN	NaN	-0.307298	-0.345407	-0.255065	NaN	0.707667	NaN	-0.262101	-0.765648	-0.848024	-0.810434
NaN	-0.108747	-0.177721	-0.0832736	0.00895939	0.447758	-0.202857	-0.53726	0.164076	-0.285664	0.62324	-1.01704	-0.202588	-0.22251	-0.396668	0.358123	0.375527	-0.0863128	-0.354017	-0.870353	-0.429122	-0.512259	0.479587	0.288022	-0.272419	-0.917111	NaN	-0.188869	-0.0884968	0.437101	-0.215581	-0.570958	0.160171	-0.303582	0.608406	-0.215295	-0.376222	-0.924945	-0.456038	-0.54439	0.468172	-0.974635	-0.181319	-0.0849594	0.477537	-0.206964	0.174988	-0.291447	-0.206689	-0.0880601
NaN	-0.653806	-0.458342	-0.65106	-0.567897	0.15543	NaN	-0.724723	-0.283035	-0.723749	-0.362978	-0.281786	-0.432964	-0.16804	-0.720442	-0.698236	-0.455215	-0.681498	NaN	-0.315816	-0.750661	NaN	-0.414225	-0.16414	NaN	-0.154752	NaN	-0.487091	-0.691897	0.151731	NaN	-0.77018	-0.300787	-0.769144	-0.385745	-0.460121	NaN	-0.335625	-0.797745	NaN	-0.440207	-0.164458	-0.467621	-0.66424	0.165767	NaN	-0.288764	-0.7384	-0.441729	-0.695295
0.386892	1.00866	0.586864	1.75018	0.209341	0.36539	1.94231	0.989797	1.69597	1.76676	0.634338	1.60231	1.70604	1.20577	-0.183464	0.573882	2.11128	1.78726	NaN	1.01038	1.15877	1.87688	1.8427	NaN	0.891552	1.64697	0.377683	0.572895	1.70853	0.356693	1.89608	0.966238	1.6556	1.72471	0.61924	1.66544	NaN	0.986334	1.13119	1.83221	1.79884	1.60777	0.625894	1.86658	0.389691	2.07148	1.80876	1.88426	1.81951	1.90612
NaN	0.138203	-0.0421082	-0.0207522	-0.147396	NaN	-0.328848	-0.00250902	-0.473628	0.150737	-0.389341	0.00297724	0.136472	0.038974	0.127687	-0.305015	NaN	0.216692	-0.197876	0.145316	0.0814722	NaN	-0.566434	0.320582	0.0968506	0.0797157	NaN	-0.0447494	-0.0220539	NaN	-0.349474	-0.0026664	-0.503336	0.14715	-0.413761	0.133224	-0.210287	0.141857	0.079533	NaN	-0.601962	0.0778183	-0.0429607	-0.0211723	NaN	-0.335505	-0.483216	0.160762	0.145548	0.231104
NaN	0.00809249	-0.44443	-0.0762777	NaN	-0.784517	-0.494857	-0.354544	-0.607028	0.0402388	-0.453556	0.115947	0.398877	0.00034939	-0.149546	-0.511628	-0.482704	0.149232	-0.375378	0.181744	-0.0619619	0.240001	-0.502616	-0.620291	-0.033692	NaN	NaN	-0.472306	-0.0810621	-0.833725	-0.525896	-0.376783	-0.645102	0.0392811	-0.482005	0.389383	-0.398923	0.177418	-0.0658484	0.234289	-0.534141	NaN	-0.453427	-0.0778219	-0.800399	-0.504875	-0.619317	0.042915	0.425405	0.159157
NaN	0.216236	-0.362129	NaN	NaN	-0.936908	-0.156954	0.221131	NaN	NaN	-0.264205	-0.0537882	NaN	NaN	-0.567435	0.793137	-0.72462	NaN	NaN	-0.156298	0.305434	NaN	NaN	-0.742265	NaN	NaN	NaN	-0.384843	NaN	-0.995674	-0.166799	0.215868	NaN	NaN	-0.280777	NaN	NaN	-0.166102	0.298164	NaN	NaN	NaN	-0.36946	NaN	-0.955875	-0.160131	NaN	NaN	NaN	NaN
NaN	0.220076	-0.130028	0.130054	NaN	0.104958	0.0476261	NaN	-0.182435	0.208998	-0.28238	0.50382	0.473579	0.619218	-0.0710465	-0.136335	0.544981	0.419497	-0.373182	0.561354	0.0466748	0.144973	0.259998	0.554085	NaN	NaN	NaN	-0.138184	0.126958	0.10246	0.0464925	NaN	-0.193878	0.204023	-0.300092	0.462307	-0.396589	0.547993	0.0455638	0.141522	0.25381	NaN	-0.13266	0.138703	0.111939	0.0507935	-0.186128	0.222897	0.505076	0.447397
NaN	0.882964	NaN	0.0917567	-0.387867	-1.47177	-0.243934	1.23651	0.0707698	0.74741	0.610605	1.04587	1.16849	1.25302	0.6168	-0.183285	1.00596	1.0367	NaN	0.657633	0.848355	NaN	-0.532033	NaN	-0.162025	-0.156146	NaN	NaN	0.0895728	-1.56408	-0.259234	1.20708	0.0690854	0.72962	0.596072	1.14068	NaN	0.641981	0.828163	NaN	-0.565404	-0.16594	NaN	0.0978592	-1.50156	-0.248872	0.0754765	0.797118	1.24621	1.10565
NaN	1.05908	0.497357	NaN	1.22967	-1.24676	-0.793877	0.954921	0.781735	0.84996	0.439638	0.951729	1.71108	0.667314	0.519449	0.521077	1.35595	2.90579	-0.841229	0.221163	1.01434	0.983028	0.196862	0.329678	NaN	-0.0914946	NaN	0.485519	NaN	-1.32496	-0.843672	0.932192	0.763129	0.82973	0.429174	1.67035	-0.893993	0.215899	0.990196	0.959631	0.192177	-0.0972334	0.530434	NaN	-1.272	-0.809949	0.833726	0.906489	1.82487	3.09905
NaN	0.0464396	-0.0812056	0.17289	0.20999	-0.063591	-0.11987	-0.122277	0.381456	-0.206444	0.498755	0.346724	-0.229625	-0.110805	-0.195968	0.196452	0.491774	NaN	NaN	0.0367778	-0.244019	0.0255438	0.00959	0.0212723	-0.400332	NaN	NaN	-0.0862991	0.168775	-0.0675796	-0.127389	-0.129946	0.372377	-0.219392	0.486884	-0.244028	NaN	0.0359024	-0.259325	0.0249358	0.00936174	NaN	-0.0828496	0.184389	-0.0648784	-0.122297	0.406825	-0.210623	-0.234274	NaN
NaN	0.895115	1.55893	0.481321	1.15913	1.9862	NaN	NaN	1.4125	0.502845	0.94792	0.661361	0.731501	0.882236	1.07024	1.49019	1.00603	0.365416	NaN	0.652901	NaN	NaN	0.955052	1.08765	NaN	NaN	NaN	1.52183	0.469865	1.93893	NaN	NaN	1.37888	0.490877	0.925359	0.71409	NaN	0.637361	NaN	NaN	0.93232	NaN	1.66261	0.513332	2.1183	NaN	1.50644	0.536288	0.78015	0.389719
NaN	0.0288037	-0.169569	0.756868	-0.543357	-0.544838	NaN	0.156443	0.655404	0.0739486	-2.11619	-0.412872	-0.456522	-1.24251	0.0421287	-0.353672	0.660257	-0.0427047	-1.24383	-0.22654	-0.114143	0.405359	0.553856	-1.10821	-0.174337	-0.109409	NaN	-0.180205	0.738854	-0.579012	NaN	0.152719	0.639804	0.0721885	-2.24892	-0.485156	-1.32184	-0.240749	-0.121303	0.395711	0.540674	-0.116272	-0.173002	0.807205	-0.555867	NaN	0.698993	0.0788667	-0.465764	-0.0435692
NaN	-1.1511	0.841849	-0.988852	-0.304221	1.53369	-0.0139181	-0.575889	2.37588	0.464967	-1.03069	0.382181	0.786438	-0.574139	-2.37918	-1.43008	-1.01703	0.891332	-1.73064	-0.669498	-0.341299	-0.954899	0.373051	0.772195	-2.53642	NaN	NaN	0.821812	-1.05088	1.49719	-0.014791	-0.61201	2.31933	0.4539	-1.09533	0.76772	-1.83919	-0.711491	-0.362707	-1.01479	0.364172	NaN	0.897838	-1.00887	1.63569	-0.0141998	2.5339	0.49589	0.838742	0.950611
NaN	-0.468298	-0.807426	0.124381	-0.124388	-0.111149	-0.161579	-0.18459	-0.128521	-0.267442	-0.582891	-0.488693	0.0508656	-0.0802019	-0.676883	-0.739298	NaN	-0.120968	-1.20248	-0.212474	-0.434335	-0.206045	0.443658	-0.177413	-1.04758	-0.189624	NaN	-0.85807	0.12142	-0.118121	-0.171714	-0.196169	-0.136582	-0.284217	-0.619452	0.0496549	-1.27791	-0.225802	-0.461578	-0.218969	0.433098	-0.201518	-0.823771	0.132653	-0.1134	-0.16485	-0.131123	-0.272857	0.0542485	-0.123417
NaN	-0.999859	NaN	-0.419958	-0.118057	NaN	-0.0233911	-0.897846	-0.123332	NaN	0.255838	-0.497537	NaN	-0.0256838	-0.828169	-0.406601	-0.636552	NaN	NaN	-0.753878	NaN	-0.993663	-0.187842	-0.285659	NaN	NaN	NaN	NaN	-0.446299	NaN	-0.0248583	-0.954162	-0.131067	NaN	0.249748	NaN	NaN	-0.801164	NaN	-1.05599	-0.199624	NaN	NaN	-0.428459	NaN	-0.0238646	-0.125828	NaN	NaN	NaN
NaN	0.429505	-1.04892	NaN	-0.121794	-0.517863	NaN	-0.821949	-0.285518	-0.639355	-1.0886	-0.926151	-0.247053	-0.269185	0.136085	0.299888	NaN	-0.255974	NaN	NaN	-1.11789	NaN	-0.619265	-0.573373	NaN	NaN	NaN	-1.11471	NaN	-0.550345	NaN	-0.873504	-0.303427	-0.679457	-1.15688	-0.262549	NaN	NaN	-1.18801	NaN	-0.658107	NaN	-1.07016	NaN	-0.528347	NaN	-0.291298	-0.652298	-0.252054	-0.261156
NaN	-0.210881	0.412881	-0.054781	-0.157272	1.12751	0.841881	NaN	0.271373	0.0362127	0.345205	-0.185975	-0.28598	-0.791977	-0.0836489	0.541349	NaN	0.0294489	0.158953	-0.524203	0.0534394	NaN	0.0646921	0.136867	0.0999061	0.158877	NaN	0.403054	-0.0582171	1.10068	0.821843	NaN	0.264914	0.0353508	0.336988	-0.303918	0.15517	-0.557083	0.0521675	NaN	0.0631523	0.155095	0.44034	-0.05589	1.2025	0.897872	0.289421	0.0386211	-0.29177	0.0314075
NaN	-1.10133	-0.832361	-1.00398	-1.48894	-0.634696	-0.718639	-0.830024	-1.00773	-0.89853	-0.822504	-0.647886	-1.12647	-0.69349	-1.02613	-1.08873	-0.35235	-1.35857	-0.637593	-0.814275	-1.01832	-1.09654	-0.754471	-0.960699	-0.896681	-0.738498	NaN	-0.88457	-1.06695	-0.674506	-0.763714	-0.882086	-1.07093	-0.954889	-0.874094	-1.19712	-0.677585	-0.865349	-1.0822	-1.16532	-0.801793	-0.784819	-0.849212	-1.02431	-0.647545	-0.733187	-1.02813	-0.91672	-1.14927	-1.38608
0.1944	-0.487392	0.234166	-0.0740374	-0.256636	0.412785	0.076309	-0.498314	-0.0973264	-0.12876	0.108803	-0.426962	-0.426359	-0.039512	-0.194323	0.109626	0.143472	-0.249084	0.0334413	-0.42773	-0.454659	0.0389244	0.0554439	-0.048064	-0.222632	0.0310034	0.189773	0.228593	-0.0786812	0.40296	0.0744927	-0.52957	-0.103431	-0.136836	0.106213	-0.453101	0.0326453	-0.454559	-0.483177	0.0379979	0.0541243	0.0302655	0.24974	-0.0755362	0.440238	0.0813841	-0.0992967	-0.131367	-0.43499	-0.254127
0.252017	-0.15649	-0.0187919	-0.0852966	-0.393789	0.126465	0.115917	-0.115323	-0.237458	-0.285031	-0.176776	-0.211968	-0.273498	0.0779589	-0.106903	-0.293146	0.108472	-0.308755	0.381221	-0.181806	-0.427231	0.0350027	0.127307	-0.027685	0.126574	-0.202235	0.246018	-0.0199706	-0.0906467	0.123455	0.113158	-0.122556	-0.252352	-0.30291	-0.187864	-0.290653	0.372147	-0.19321	-0.454029	0.0341696	0.124277	-0.21492	-0.0191724	-0.0870234	0.134875	0.123626	-0.242265	-0.290802	-0.279035	-0.315005
NaN	-0.529132	0.305717	NaN	-0.287143	0.504845	0.615964	-0.32257	-0.0814516	-0.179	0.0830643	0.00548383	0.0593919	-0.197416	-0.0636293	0.157308	0.22161	0.043566	-0.177889	-0.344882	-0.407162	-0.156901	-0.0565383	0.385359	-0.342343	0.144496	NaN	0.29844	NaN	0.492829	0.601303	-0.342803	-0.0865605	-0.190228	0.0810873	0.0579783	-0.189047	-0.366514	-0.432701	-0.166742	-0.0600846	0.141057	0.326049	NaN	0.538421	0.65693	-0.0831005	-0.182624	0.0633418	0.0464634
NaN	1.28736	NaN	1.43088	1.00452	1.03102	0.752318	0.562373	1.29892	0.95819	NaN	-0.454224	0.208814	-0.255539	1.47209	1.11304	NaN	0.376137	NaN	0.179046	NaN	NaN	1.65798	0.395306	NaN	0.593927	NaN	NaN	1.39682	1.00648	0.734411	0.548988	1.26801	0.935384	NaN	0.203844	NaN	0.174784	NaN	NaN	1.61852	0.579791	NaN	1.52604	1.09959	0.802352	1.38531	1.02192	0.222702	0.401152
NaN	0.622475	0.659995	NaN	-0.00751646	0.883108	2.30121	NaN	0.0826277	NaN	NaN	0.31007	0.365159	1.23079	NaN	1.22016	1.13534	0.463236	1.3771	0.787541	NaN	NaN	1.17266	1.20698	1.12298	0.145202	NaN	0.644286	NaN	0.862089	2.24644	NaN	0.0806611	NaN	NaN	0.356468	1.34432	0.768796	NaN	NaN	1.14475	0.141746	0.703889	NaN	0.941841	2.45426	0.088123	NaN	0.389445	0.494045
NaN	-1.11048	-1.82478	-0.83182	-1.95681	-1.24605	-0.808297	-2.44959	-0.829892	-0.994466	-1.72338	-1.53317	-2.47008	-2.21681	-1.06507	-0.646512	-1.85148	-2.06507	-1.04153	-1.85461	-1.05808	-2.49247	-1.28725	-1.63401	-0.641572	-2.05414	NaN	-1.93924	-0.883995	-1.32421	-0.858996	-2.60323	-0.881946	-1.05684	-1.83147	-2.62501	-1.10686	-1.97094	-1.12445	-2.64881	-1.36799	-2.18298	-1.86173	-0.84866	-1.27128	-0.824661	-0.846693	-1.0146	-2.52009	-2.10688
NaN	-0.793841	-1.58618	NaN	-1.13505	NaN	-0.645057	-1.92054	-0.883198	-0.890763	-0.848769	-0.775114	-1.43345	-1.13107	-0.429706	-0.516127	NaN	NaN	NaN	-1.43819	-0.990588	NaN	-0.622177	-0.983754	NaN	NaN	NaN	-1.68567	NaN	NaN	-0.685517	-2.041	-0.938595	-0.946634	-0.902006	-1.52336	NaN	-1.5284	-1.05272	NaN	-0.661202	NaN	-1.61829	NaN	NaN	-0.658115	-0.901078	-0.908795	-1.46247	NaN
NaN	NaN	-1.58618	-0.91122	-1.23221	-0.649858	NaN	-1.85176	-0.891222	-0.930583	-1.08588	-0.786511	-1.82917	-1.32924	-0.641415	NaN	-1.24457	-1.40917	NaN	-1.1787	NaN	-1.60664	-0.987608	-1.04757	NaN	-1.50599	NaN	-1.68567	-0.968375	-0.690619	NaN	-1.96791	-0.947122	-0.988952	-1.15399	-1.94391	NaN	-1.25263	NaN	-1.70741	-1.04955	-1.60045	-1.61829	-0.929667	-0.663014	NaN	-0.909264	-0.949422	-1.8662	-1.4377
NaN	0.246706	-0.785952	0.0694798	-0.457036	-0.200215	1.13134	NaN	-0.657417	0.054391	NaN	-0.354959	-0.801443	-1.08976	-0.0576244	0.00538353	NaN	-0.249084	NaN	-0.551093	NaN	NaN	-0.339792	-0.19469	NaN	-0.659599	NaN	-0.83525	0.0678261	-0.212773	1.10441	NaN	-0.698653	0.0530965	NaN	-0.851712	NaN	-0.585659	NaN	NaN	-0.361105	-0.700971	-0.801863	0.0741007	-0.204268	1.20658	-0.670726	0.0580084	-0.817667	-0.254127
NaN	-0.00746865	1.65919	0.945782	0.41081	-4.81602	-0.106645	0.225555	0.256427	0.785663	0.693413	-5.22757	1.33934	1.15635	0.845194	0.483038	NaN	NaN	NaN	0.421596	-0.046789	1.0544	0.437002	0.502303	1.03721	0.673682	NaN	1.6197	0.923271	-5.1181	-0.113335	0.220186	0.250323	0.766963	0.676909	1.30746	NaN	0.411561	-0.0497237	1.0293	0.4266	0.657647	1.76954	1.00868	-4.91352	-0.108804	0.273481	0.837915	1.42841	NaN
NaN	-0.793841	-0.641153	0.300468	-1.3335	-1.21414	-0.068778	NaN	-0.76923	0.475796	-1.66604	-1.07862	0.0318231	-0.245965	-2.05979	-1.80076	-0.556071	0.851292	NaN	-0.00665526	-0.830799	0.00905277	NaN	-0.959008	-2.3134	-1.11818	NaN	-0.681368	0.293316	-1.29029	-0.073092	NaN	-0.817478	0.464471	-1.77054	0.0310656	NaN	-0.0070727	-0.882909	0.00883731	NaN	-1.18832	-0.654132	0.320451	-1.23872	-0.0701703	-0.784802	0.50744	0.0339395	0.907909
NaN	-0.715689	NaN	-0.154519	-0.220669	0.825804	0.123677	NaN	-1.28211	-0.0943947	-0.591257	-0.53257	-0.168873	0.327222	NaN	-0.913347	0.270006	-0.391416	-0.425882	0.4899	-0.292617	NaN	0.482385	NaN	NaN	NaN	NaN	NaN	-0.164211	0.806149	0.120733	NaN	-1.36253	-0.100315	-0.628343	-0.179465	-0.452594	0.47824	-0.310971	NaN	0.470904	NaN	NaN	-0.157647	0.880726	0.131902	-1.30806	-0.0963057	-0.172292	-0.39934
NaN	-0.404744	NaN	0.507045	0.831453	0.944201	NaN	1.06704	-0.0559637	0.214894	0.577836	0.863145	0.647808	1.46411	0.46766	NaN	0.820728	0.559152	1.46414	1.25662	0.559305	0.878836	0.0820342	-0.150308	0.540962	0.916732	NaN	NaN	0.494977	0.921728	NaN	1.04164	-0.0594739	0.20978	0.564083	0.632389	1.42929	1.22671	0.545992	0.857918	0.0800817	0.894913	NaN	0.540767	1.007	NaN	-0.0570966	0.229186	0.690892	0.59634
1.85449	1.32507	0.740836	0.734825	0.811197	NaN	0.499563	1.16027	-0.179909	0.885746	0.523104	1.30694	0.593862	1.30776	1.18204	-0.0195308	0.639633	0.887702	1.4082	0.825587	0.440632	1.55624	0.279735	-0.0266673	2.35691	1.13967	1.81035	0.723203	0.717335	NaN	0.487673	1.13265	-0.191194	0.864664	0.510654	0.579728	1.37469	0.805937	0.430144	1.5192	0.273076	1.11254	0.790107	0.783696	NaN	0.532788	-0.183551	0.944654	0.633358	0.94674
NaN	1.63436	1.84895	NaN	1.92056	1.72163	2.35385	1.50523	1.09435	1.29059	1.68481	1.33664	0.919064	1.44148	1.56221	NaN	NaN	1.51649	2.16551	1.13771	0.55908	1.62702	0.726489	1.51856	3.13215	1.20564	NaN	1.80495	NaN	1.68065	2.29783	1.46941	1.06831	1.25987	1.64471	0.897189	2.11397	1.11063	0.545773	1.5883	0.709198	1.17694	1.97192	NaN	1.83613	2.5104	1.16714	1.37642	0.980188	1.61734
NaN	1.81902	1.73176	0.361829	NaN	NaN	NaN	1.52304	0.369752	1.49271	2.46413	2.16179	1.69969	2.35852	1.05087	1.87834	NaN	1.68061	NaN	1.21359	0.738014	NaN	NaN	1.66529	3.56632	NaN	NaN	1.69054	0.353217	NaN	NaN	1.48679	0.360951	1.45718	2.40548	1.65923	NaN	1.1847	0.720448	NaN	NaN	NaN	1.84693	0.385893	NaN	NaN	0.394343	1.59199	1.81273	1.79238
NaN	-0.398463	NaN	0.100725	NaN	-0.281505	NaN	NaN	-1.30014	0.238348	-0.197146	0.581591	NaN	NaN	-0.367449	0.264873	NaN	NaN	0.914301	-0.606293	-0.00963184	NaN	-0.173964	-0.396943	0.578207	NaN	NaN	NaN	0.0983272	-0.299162	NaN	NaN	-1.38168	0.232675	-0.209512	NaN	0.892539	-0.644322	-0.010236	NaN	-0.184876	NaN	NaN	0.107424	-0.287204	NaN	-1.32646	0.2542	NaN	NaN
-0.782056	-1.04112	-0.205339	NaN	-0.435196	-0.477194	-1.14181	-1.15572	-0.679484	-1.15232	-0.497759	-0.492236	-1.01759	-1.03599	-0.78613	-0.846529	-1.03893	-1.14217	-1.52261	-0.73626	-0.919525	-1.11645	-0.884203	-0.576994	-0.418958	-0.480187	-0.831109	-0.218218	NaN	-0.507125	-1.21343	-1.22821	-0.722104	-1.22459	-0.52898	-1.08142	-1.61811	-0.78244	-0.9772	-1.18647	-0.939663	-0.510305	-0.209496	NaN	-0.486854	-1.16493	-0.69324	-1.17564	-1.03819	-1.16529
NaN	-0.231163	-0.538091	-0.141782	0.21185	-0.236341	-0.237978	0.013884	-0.0765134	-0.559561	-0.253087	-1.27766	0.0184324	-0.0473535	0.144392	-0.227773	NaN	NaN	NaN	-0.116586	NaN	NaN	-0.551303	-0.232251	0.128013	0.461792	NaN	-0.571842	-0.150675	-0.251165	-0.252905	0.0135536	-0.0813126	-0.594658	-0.268961	0.0179937	NaN	-0.123899	NaN	NaN	-0.585883	0.4508	-0.548984	-0.144653	-0.241125	-0.242796	-0.0780624	-0.570889	0.0196583	NaN
-1.50552	-0.573094	-1.34223	-0.931645	-0.23057	-0.0962181	NaN	NaN	0.526327	-1.01588	-0.692387	-0.919154	-0.258272	-1.20848	-0.510676	-0.407988	-1.32938	0.28815	NaN	NaN	-0.908448	NaN	-0.265724	-0.708975	NaN	-1.19328	-1.59995	-1.42642	-0.99008	-0.102253	NaN	NaN	0.5138	-1.07959	-0.735815	-0.274472	NaN	NaN	-0.965428	NaN	-0.282391	-1.26813	-1.3694	-0.950505	-0.098166	NaN	0.561332	-1.03644	-0.263501	0.307314
NaN	-0.562309	NaN	-1.11854	-1.20049	-0.463219	-0.0404916	-2.37337	-0.695522	-0.977671	-0.954873	-0.996609	-1.82075	-1.32242	-0.521614	-0.0563343	-0.681587	-2.1045	NaN	-1.52912	-1.10895	-2.3254	-0.940957	-0.928581	NaN	-1.09691	NaN	NaN	-1.1887	-0.492274	-0.0430314	-2.52223	-0.739147	-1.03899	-1.01477	-1.93495	NaN	-1.62503	-1.1785	-2.47126	-0.999976	-1.16571	NaN	-1.14118	-0.472597	-0.0413113	-0.709602	-0.997463	-1.85761	-2.14711
NaN	-0.995231	-0.642054	NaN	-0.645768	-0.0916105	-0.840279	NaN	-0.584141	-1.70634	0.705559	NaN	-1.14589	-0.566871	-0.812829	-0.288622	-0.524168	-1.90863	NaN	-0.981156	NaN	NaN	-0.654346	-0.489653	NaN	-1.08005	NaN	-0.682325	NaN	-0.0973566	-0.892984	NaN	-0.62078	-1.81337	0.688766	-1.21777	NaN	-1.0427	NaN	NaN	-0.695389	-1.14779	-0.655051	NaN	-0.0934651	-0.85729	-0.595967	-1.74088	-1.16909	-1.94727
-0.659407	-0.481689	-0.0499325	NaN	NaN	-0.135465	NaN	NaN	0.444467	-0.622956	0.23167	0.478744	-0.249569	NaN	0.333142	0.413926	NaN	NaN	0.577766	-0.526497	-0.345682	NaN	0.0947658	0.115188	-0.200816	-0.427398	-0.700767	-0.0530644	NaN	-0.143961	NaN	NaN	0.433888	-0.66203	0.226155	-0.265223	0.564015	-0.55952	-0.367364	NaN	0.0925102	-0.454206	-0.0509433	NaN	-0.138207	NaN	0.474027	-0.635567	-0.254622	NaN
NaN	-0.615249	-0.874853	-2.72007	-2.01094	-1.66788	NaN	-1.65433	-0.0445538	NaN	-1.66807	-0.657751	-1.64648	-0.88734	-0.547033	-0.298031	-1.65365	NaN	NaN	-1.72057	-2.4738	-2.77594	-1.2303	-1.55757	NaN	-1.33057	NaN	-0.929727	-2.89068	-1.7725	NaN	-1.7581	-0.0473483	NaN	-1.77269	-1.74975	NaN	-1.82849	-2.62897	-2.95005	-1.30747	-1.41402	-0.892564	-2.77514	-1.70165	NaN	-0.0454557	NaN	-1.67981	NaN
NaN	-0.775393	-0.246672	NaN	-0.0633646	NaN	NaN	-0.448808	-0.280678	-0.175464	0.404008	-0.414729	-0.410659	-0.414377	-0.114669	-0.269483	NaN	-0.372826	-0.137222	-0.0279081	-0.33034	NaN	-0.424644	-0.415394	0.0523859	-0.581267	NaN	-0.262144	NaN	NaN	NaN	-0.476958	-0.298283	-0.186469	0.394392	-0.436417	-0.145829	-0.0296586	-0.35106	NaN	-0.451279	-0.617726	-0.251666	NaN	NaN	NaN	-0.28636	-0.179016	-0.418973	-0.380374
NaN	-0.465533	0.10279	-0.229007	-0.103729	0.332558	0.027921	-0.617711	-0.265399	-0.390972	0.40102	-0.691212	-0.659476	-0.52182	-0.533967	0.295446	-0.365619	-0.296811	0.215378	-0.190594	-0.320737	-0.618051	-0.170567	-0.288059	0.169569	-0.270927	NaN	0.100344	-0.243371	0.324643	0.0272564	-0.656456	-0.282046	-0.415495	0.391475	-0.700841	0.210252	-0.202549	-0.340855	-0.656817	-0.181266	-0.28792	0.109627	-0.233643	0.354676	0.0297779	-0.270772	-0.398887	-0.672827	-0.302819
0.860049	-0.0581869	0.723949	0.0718619	0.504218	0.639098	0.295597	-0.244406	-0.0729801	-0.0949336	0.538752	-0.754513	-0.0813134	-0.0988017	0.0459495	0.13339	-0.109705	-0.14318	NaN	-0.18422	-0.254944	-0.01579	0.127853	-0.0998969	0.739082	-0.186761	0.839579	0.706718	0.0701515	0.623886	0.288561	-0.259736	-0.0775576	-0.100888	0.525929	-0.0864136	NaN	-0.195775	-0.270935	-0.0167804	0.12481	-0.198475	0.772097	0.0766412	0.681602	0.315256	-0.0744575	-0.0968554	-0.0829595	-0.146078
0.342617	-0.610782	0.124136	-0.28271	-0.129888	0.242524	-0.0390282	-0.686836	-0.223215	-0.428296	0.177608	-0.891818	-0.382876	-0.338755	-0.411304	-0.0507925	-0.16619	-0.526282	NaN	-0.329951	-0.610359	-0.4271	-0.0421022	-0.305281	0.183488	-0.0622177	0.334462	0.121182	-0.300443	0.236752	-0.0414762	-0.729916	-0.237216	-0.45516	0.173381	-0.406891	NaN	-0.350646	-0.648643	-0.453889	-0.0447429	-0.0661202	0.132392	-0.288433	0.258654	-0.0398183	-0.227734	-0.436966	-0.390627	-0.536936
-0.216008	-0.39127	-0.448256	NaN	NaN	-0.0762085	0.0205034	-1.40175	NaN	-0.184056	-0.515615	NaN	NaN	-1.03867	-0.728873	NaN	NaN	NaN	-0.277114	-0.220347	NaN	NaN	NaN	-0.888669	NaN	-0.454089	-0.229557	-0.476372	NaN	-0.0809886	0.0200153	-1.48967	NaN	-0.195601	-0.547956	NaN	-0.294496	-0.234168	NaN	NaN	NaN	-0.482571	-0.457331	NaN	-0.0777513	0.021867	NaN	-0.187782	NaN	NaN
-0.263782	-0.42652	-0.262662	-0.72682	-0.74238	-0.843348	-0.723047	-0.541082	-0.708362	-0.777707	-0.903452	-0.871037	-0.827701	-0.790297	-0.451463	-0.72887	-0.859588	-0.682798	-0.770413	-0.577767	-0.792939	-0.45768	-0.612599	-0.703252	-0.701087	-0.7452	-0.280327	-0.279136	-0.772409	-0.896245	-0.768399	-0.57502	-0.752793	-0.826487	-0.960119	-0.879617	-0.818736	-0.614007	-0.842674	-0.486387	-0.651023	-0.791942	-0.267979	-0.741534	-0.860421	-0.737684	-0.722702	-0.793451	-0.844457	-0.696621
-0.0313209	-0.316965	0.212762	-0.423847	-0.585238	-0.667187	-0.477872	-0.42623	-0.406001	-0.395417	-0.526457	-0.674263	-0.337335	-0.317133	-0.394608	-0.382331	-0.599536	-0.196842	-1.10218	-0.316684	-0.456512	-0.418364	-0.376315	-0.622098	-0.925548	-0.506699	-0.0332854	0.207698	-0.450432	-0.709036	-0.507846	-0.452965	-0.431467	-0.420219	-0.559479	-0.358494	-1.17132	-0.336547	-0.485146	-0.444605	-0.399919	-0.538481	0.226913	-0.432427	-0.680694	-0.487546	-0.414221	-0.403422	-0.344164	-0.200827
NaN	-1.62277	-0.820822	-0.830966	-2.17153	-1.8705	-1.16729	-1.98696	-2.35424	-1.26576	-2.0824	-1.53332	-2.39138	-2.58622	-0.613432	-1.96233	-1.87654	-2.14627	NaN	-1.80956	-1.26959	-2.3696	-2.19773	-2.12142	-0.907612	-1.89706	NaN	-0.872306	-0.883087	-1.98782	-1.24051	-2.11158	-2.5019	-1.34515	-2.21302	-2.54138	NaN	-1.92306	-1.34922	-2.51823	-2.33558	-2.01604	-0.837439	-0.847788	-1.90836	-1.19092	-2.4019	-1.29138	-2.43979	-2.18972
-0.487186	-0.309901	-0.403132	-0.804047	-0.900579	-0.478672	-0.822713	NaN	-0.0328048	-0.768772	-0.621769	-0.491692	-0.447533	-0.273971	-0.600625	-0.6781	-0.313954	-0.611319	NaN	-0.726615	NaN	-0.928245	-0.712188	0.00384778	NaN	-0.534348	-0.517744	-0.428417	-0.854479	-0.508695	-0.874316	NaN	-0.0348624	-0.816992	-0.660768	-0.475603	NaN	-0.77219	NaN	-0.986467	-0.756858	-0.567864	-0.411293	-0.820324	-0.488362	-0.839368	-0.0334689	-0.784336	-0.456593	-0.623694
-0.0307623	-0.343325	-0.117425	0.073897	0.158996	0.917421	0.838027	-0.357763	-0.0997031	0.00655906	0.0376324	0.595075	-0.0762428	0.167279	0.0328838	-0.108672	0.425386	-0.213278	0.325022	0.591475	-0.0220117	0.521911	0.162908	-0.0247096	-0.302449	1.1228	-0.0326918	-0.12479	0.0721381	0.895585	0.818081	-0.380203	-0.105957	0.00640294	0.0367367	-0.081025	0.317286	0.577397	-0.0233923	0.509489	0.15903	1.09607	-0.119802	0.0788117	0.978436	0.893762	-0.101722	0.00699528	-0.0777863	-0.217596
0.635994	-0.0422615	-0.0131834	0.0610954	0.363907	NaN	0.101101	0.164902	0.0351266	0.0485703	0.211555	-0.301348	-0.359026	-0.00946963	-0.0947783	0.300954	0.386182	-0.0175304	-0.282985	-0.399943	-0.1044	NaN	0.057852	0.329595	-0.0159946	0.0713177	0.620856	-0.0140103	0.0596412	NaN	0.0986951	0.160977	0.0342905	0.0474143	0.206519	-0.381545	-0.300735	-0.425029	-0.110948	NaN	0.056475	0.0696202	-0.0134503	0.0651586	NaN	0.107825	0.0374627	0.0518006	-0.366294	-0.0178853
0.309357	0.0480861	-0.00393681	NaN	0.428947	0.295904	0.567826	-0.212088	-0.247547	0.129662	0.368267	0.0844134	-0.023676	0.141992	0.0841289	0.0724936	0.135902	0.0264333	0.336301	0.259515	-0.044897	0.0935438	-0.221879	0.259076	0.208819	0.382256	0.301994	-0.00418374	NaN	0.288861	0.554311	-0.225391	-0.263074	0.126576	0.359502	-0.0251611	0.328296	0.253338	-0.047713	0.0913173	-0.235796	0.373158	-0.00401651	NaN	0.315584	0.605591	-0.252558	0.138285	-0.0241553	0.0281913
0.886207	0.26567	0.299524	0.287757	0.441593	1.15758	0.121372	0.176669	0.284876	0.15145	0.728348	-0.459372	0.253116	0.260638	0.194431	0.296755	0.822744	0.225905	0.308089	-0.855442	0.0744491	-0.226727	0.438781	0.562462	0.5754	-0.461561	0.865114	0.292395	0.280908	1.13003	0.118483	0.172464	0.278095	0.147845	0.711013	0.247091	0.300756	-0.909098	0.0726771	-0.240948	0.428337	-0.490512	0.319445	0.306895	1.23457	0.129444	0.303822	0.161522	0.26995	0.240929
0.406968	-1.38514	-0.284979	-0.835775	NaN	0.0813105	-0.0571408	-0.763658	-0.500113	-0.872547	-0.0136097	-0.474855	-1.0267	-0.429857	-0.21909	-0.55223	-0.171772	-0.722972	-0.561026	-0.237564	-0.83261	-0.33284	-0.662229	0.0187951	-0.463499	-0.360319	0.397282	-0.302853	-0.888198	0.0793752	-0.0607249	-0.811558	-0.531482	-0.927276	-0.0144633	-1.0911	-0.596216	-0.252465	-0.884834	-0.353717	-0.703766	-0.382919	-0.290748	-0.852695	0.0867182	-0.0582976	-0.510238	-0.890211	-1.04749	-0.737608
0.101311	0.0252495	0.0978376	0.354227	0.221332	0.509729	0.616217	0.0414825	0.295567	0.122725	0.508835	0.520935	0.375343	0.431835	0.157168	0.424193	0.893791	0.0926539	NaN	0.264879	0.490393	0.378854	0.544081	0.836165	0.364747	0.704299	0.0989001	0.0955089	0.345796	0.497597	0.60155	0.0404951	0.288532	0.119804	0.496725	0.36641	NaN	0.258575	0.478721	0.369837	0.531131	0.687536	0.104344	0.377786	0.543629	0.657199	0.315224	0.130887	0.400306	0.098816
0.0802651	0.00380392	0.309418	0.230531	0.382485	0.72686	1.0161	0.123697	-0.203176	0.208485	0.437345	0.55241	0.0959176	0.17742	0.201746	0.0568014	0.222501	0.0332012	0.280194	0.737393	0.138972	0.44053	-0.0851006	-0.0435578	0.273257	0.854993	0.0783547	0.302053	0.225044	0.70956	0.991917	0.120752	-0.215919	0.203523	0.426935	0.0936346	0.273525	0.719842	0.135664	0.430045	-0.0904384	0.834643	0.329997	0.245863	0.775202	1.08368	-0.207289	0.222351	0.102297	0.0354093
0.139535	-0.394429	-0.0647753	NaN	0.0173405	0.0192127	0.395241	-0.0901344	-0.637471	0.0652204	0.254838	0.00200966	0.00754595	0.00718892	-0.0683385	-0.341484	0.16949	-0.0991907	0.374275	0.278891	-0.117259	-0.0869535	0.0146487	NaN	0.141644	0.122418	0.136213	-0.0688382	NaN	0.0187554	0.385834	-0.095788	-0.677455	0.0636681	0.248773	0.00736635	0.365366	0.272253	-0.124614	-0.0924075	0.0143001	0.119504	-0.0660866	NaN	0.0204905	0.421528	-0.650376	0.0695581	0.00804781	-0.101199
-0.68566	-1.7074	-1.70017	NaN	-0.611453	-0.443705	NaN	-1.92633	NaN	-1.21825	-1.0476	-2.34154	-1.08452	-1.3335	NaN	-0.983782	NaN	-1.34032	0.329686	-0.597232	NaN	-1.95671	NaN	-1.41745	-1.27996	NaN	-0.728667	-1.80681	NaN	-0.471536	NaN	-2.04715	NaN	-1.29466	-1.11331	-1.15255	0.321839	-0.634693	NaN	-2.07944	NaN	NaN	-1.73459	NaN	-0.452687	NaN	NaN	-1.24291	-1.10648	-1.36745
1.11804	-0.0361389	0.587792	0.366843	0.526418	0.737	0.867931	0.045382	0.364778	0.197574	0.619391	0.529439	0.370898	0.434321	0.350243	0.260093	1.10434	0.121263	0.708313	0.0237907	0.144916	0.505056	0.413396	0.591566	0.683352	0.612982	1.09143	0.573802	0.358112	0.719458	0.847273	0.0443018	0.356096	0.192872	0.604649	0.36207	0.691454	0.0232244	0.141466	0.493035	0.403557	0.598392	0.626884	0.391241	0.786015	0.925655	0.389038	0.210714	0.395565	0.129327
0.462993	-0.144966	0.590625	-0.0786769	0.0857055	0.0187416	0.0466775	-0.0881055	-0.735144	-0.0139499	0.0393697	-0.344407	-0.213216	-0.0425448	-0.19537	-0.112804	0.116759	-0.15225	0.248924	-0.0800336	-0.0676897	-0.287068	0.144642	-0.0499754	0.102652	-0.17305	0.451973	0.576567	-0.0836118	0.0182955	0.0455665	-0.0936318	-0.781255	-0.0148248	0.0384327	-0.226589	0.242999	-0.0850536	-0.0719355	-0.305074	0.141199	-0.183905	0.629906	-0.0802696	0.019988	0.0497818	-0.750027	-0.0142323	-0.217532	-0.155333
NaN	-0.171816	-0.295259	0.075621	0.0409882	0.42194	0.0515719	-0.182998	-0.0515977	-0.165767	0.227329	-0.0812476	0.0369845	0.135867	-0.0641512	-0.0832809	0.378213	-0.0909953	-0.23828	-0.0459664	-0.078207	-0.0149353	0.17782	0.334799	-0.512733	0.0157697	NaN	-0.313778	0.0738211	0.411897	0.0503445	-0.194476	-0.054834	-0.176164	0.221918	0.0361042	-0.253226	-0.0488495	-0.0831124	-0.0158721	0.173587	0.0153944	-0.301236	0.0806503	0.450002	0.0550018	-0.0526422	-0.169122	0.0394442	-0.0928374
0.622189	-0.0942841	NaN	NaN	-0.0452708	0.288244	NaN	-0.0525656	-0.00836982	-0.261271	0.427867	-0.499706	-0.127563	-0.105947	0.112821	NaN	-0.0101599	-0.276317	0.519814	NaN	NaN	-0.18591	-0.102674	NaN	NaN	NaN	0.60738	NaN	NaN	0.281384	NaN	-0.0558627	-0.0088948	-0.277659	0.417683	-0.135564	0.507442	NaN	NaN	-0.197571	-0.109114	NaN	NaN	NaN	0.307414	NaN	-0.00853926	-0.26656	-0.130146	-0.281911
NaN	-0.108411	0.141096	-0.287362	-0.0481929	-0.470861	-1.36466	-0.349809	-0.363067	NaN	NaN	0.247513	-0.308661	-0.846648	-0.119026	-0.346324	NaN	-0.169959	-1.21373	-0.330702	-0.456838	NaN	-0.517501	-0.346838	-0.412541	NaN	NaN	0.137738	-0.305386	-0.500395	-1.45026	-0.37175	-0.38584	NaN	NaN	-0.328021	-1.28986	-0.351444	-0.485493	NaN	-0.54996	NaN	0.15048	-0.293179	-0.480393	-1.39229	-0.370417	NaN	-0.314909	-0.1734
0.91836	0.252658	0.184417	-0.354619	-0.135691	1.06864	0.0813622	NaN	0.0647041	-0.465178	1.03174	-0.308833	-0.0410657	0.0699337	0.450176	0.720275	NaN	-0.449402	0.641361	-0.538628	NaN	NaN	NaN	0.666759	0.93662	0.19136	0.896502	0.180027	-0.376862	1.0432	0.0794257	NaN	0.063164	-0.494355	1.00718	-0.0436415	0.626096	-0.572413	NaN	NaN	NaN	0.186805	0.196682	-0.361798	1.13971	0.0867734	0.0690074	-0.474595	-0.041897	-0.4585
NaN	0.159015	0.23145	NaN	2.65523	-0.889173	0.562766	0.892031	-0.435859	NaN	NaN	0.789058	1.01016	1.00999	0.426944	-0.597143	-0.894943	0.728758	NaN	1.21418	1.53916	NaN	NaN	-0.130012	NaN	0.757233	NaN	0.225941	NaN	-0.944945	0.549371	0.870799	-0.463197	NaN	NaN	0.986112	NaN	1.18528	1.50253	NaN	NaN	0.739209	0.246843	NaN	-0.907174	0.600194	-0.444682	NaN	1.07734	0.777226
NaN	1.34106	1.9909	1.4988	NaN	NaN	NaN	1.38414	1.0167	NaN	1.24905	1.81731	1.61804	1.47342	1.53818	1.20266	NaN	2.14438	NaN	1.44866	1.73597	1.99818	1.75165	0.49256	NaN	1.67441	NaN	1.94351	1.46312	NaN	NaN	1.35119	0.992503	NaN	1.21932	1.57953	NaN	1.41418	1.69465	1.95062	1.70996	1.63455	2.12331	1.59848	NaN	NaN	1.08432	NaN	1.72566	2.287
NaN	-2.10447	-0.584899	NaN	NaN	NaN	-0.47768	-1.96075	-0.892684	-0.513241	-0.731213	-1.29403	-0.802803	-0.888039	-1.58743	-1.14532	-0.322217	-1.33609	NaN	-0.355649	-1.43036	NaN	-1.0301	-0.446481	NaN	-1.03921	NaN	-0.621586	NaN	NaN	-0.507642	-2.08373	-0.948675	-0.545433	-0.777077	-0.853157	NaN	-0.377956	-1.52008	NaN	-1.09471	-1.1044	-0.59674	NaN	NaN	-0.48735	-0.910755	-0.523631	-0.819055	-1.36314
NaN	0.240603	0.0981837	NaN	-0.391175	-0.251888	-0.354984	-0.955353	-1.35903	NaN	0.184403	NaN	0.122668	-0.362565	-0.284744	0.15882	-0.0344467	-0.252964	0.192843	-0.450732	NaN	NaN	-0.0643125	0.12985	NaN	0.0891322	NaN	0.0958468	NaN	-0.267687	-0.37725	-1.01528	-1.44428	NaN	0.180014	0.119749	0.188253	-0.479003	NaN	NaN	-0.0683464	0.0870108	0.104714	NaN	-0.256987	-0.36217	-1.38655	NaN	0.130827	-0.258085
-0.0543156	-0.519647	0.458575	NaN	0.648724	1.0715	1.08315	NaN	0.128382	0.504714	0.35767	NaN	NaN	NaN	NaN	-0.0364034	-0.0616841	0.0300607	-0.14776	NaN	NaN	0.417525	0.934043	0.228256	NaN	0.395804	-0.0577224	0.447661	NaN	1.046	1.05737	NaN	0.125326	0.492701	0.349157	NaN	-0.157028	NaN	NaN	0.407588	0.911812	0.386383	0.489074	NaN	1.14276	1.15519	0.13692	0.538281	NaN	0.0320599
NaN	0.379125	1.24691	0.989606	0.809974	1.4703	1.64383	0.390261	0.372365	0.729243	0.882906	0.0106346	0.523412	0.359079	0.516794	0.555283	0.680206	0.520813	NaN	0.876253	1.27939	0.808739	1.27931	0.456322	NaN	1.01982	NaN	1.21724	0.966052	1.43531	1.6047	0.380972	0.363502	0.711886	0.861892	0.510954	NaN	0.855397	1.24894	0.78949	1.24886	0.995546	1.32984	1.05542	1.56809	1.75315	0.397129	0.777743	0.558222	0.555451
-0.000997774	1.25317	0.645728	NaN	NaN	0.603956	1.41612	-0.494654	NaN	-0.515381	NaN	-0.107302	1.69019	-0.0782925	0.515319	NaN	0.217239	NaN	1.08484	-0.0296834	-0.40987	-0.0169763	0.958059	0.577348	0.174348	NaN	-0.00106036	0.630359	NaN	0.589581	1.38241	-0.52568	NaN	-0.547707	NaN	1.64996	1.05902	-0.0315453	-0.435579	-0.0180411	0.935256	NaN	0.688673	NaN	0.644123	1.5103	NaN	-0.525814	1.8026	NaN
NaN	0.900178	1.08623	0.528843	1.02626	2.73914	1.14211	0.0455426	0.93655	0.406925	-0.445899	-0.0754163	1.00746	0.785965	1.23121	1.48038	0.693057	0.303755	-0.282904	0.310664	0.264897	0.504337	0.913803	1.63582	0.831956	1.07991	NaN	1.06038	0.516255	2.67394	1.11493	0.0444586	0.914259	0.397239	-0.473867	0.983486	-0.300648	0.303269	0.258592	0.492333	0.892054	1.0542	1.15847	0.564014	2.92131	1.21807	0.998837	0.433988	1.07447	0.323956
NaN	0.188471	0.604595	0.223301	1.21467	2.1378	0.516822	-0.12766	0.426072	-0.09809	-0.572292	-0.385046	0.425176	0.808393	0.480166	1.13799	1.37576	0.0393416	1.13756	0.186203	0.233705	NaN	1.31994	0.939364	NaN	0.76866	NaN	0.590205	0.217986	2.08691	0.504521	-0.135667	0.415931	-0.104242	-0.608188	0.415056	1.11048	0.181771	0.228143	NaN	1.28852	0.750365	0.644805	0.238152	2.27997	0.551194	0.454409	-0.100076	0.453453	0.0419581
0.131368	-0.375758	-0.234471	-0.37414	-0.335574	0.12392	-0.10968	-0.586628	-0.15712	-0.427269	-0.0469652	-0.473204	-0.286992	-0.220859	-0.316537	-0.122508	-0.131149	-0.5282	-0.112072	-0.348375	-0.387591	-0.428412	-0.15435	0.0119781	-0.136688	-0.314312	0.128241	-0.249178	-0.397607	0.120971	-0.116559	-0.623424	-0.166975	-0.454069	-0.0499111	-0.304993	-0.119101	-0.370227	-0.411902	-0.455284	-0.164031	-0.334027	-0.239217	-0.381714	0.132162	-0.1119	-0.160301	-0.435919	-0.292802	-0.538893
NaN	1.78833	-0.124974	NaN	NaN	-0.0753552	1.28203	2.0175	NaN	2.07022	2.782	2.58966	2.39137	2.74181	2.04152	NaN	0.306326	2.06066	0.800875	1.68065	1.59121	0.615122	0.404913	1.73005	1.94704	NaN	NaN	-0.132813	NaN	-0.0800817	1.25152	1.96948	NaN	2.02095	2.71579	2.33445	0.781813	1.64065	1.55334	0.600481	0.395275	NaN	-0.127504	NaN	-0.0768807	1.3673	NaN	2.2079	2.55041	2.19771
NaN	1.89771	NaN	0.812417	0.855686	-0.0367985	NaN	-0.297894	1.60219	0.843637	1.00714	-0.886381	2.79802	2.98134	-1.70271	0.674424	NaN	NaN	NaN	1.78597	2.50921	NaN	0.622753	0.879159	NaN	1.5347	NaN	NaN	0.793081	-0.0391066	NaN	-0.316579	1.56406	0.823557	0.983172	2.73143	NaN	1.74347	2.44949	NaN	0.60793	1.49817	NaN	0.866449	-0.0375434	NaN	1.70875	0.899745	2.98411	NaN
NaN	1.03068	NaN	NaN	1.553	NaN	1.44722	0.74134	1.26615	0.883993	1.99685	NaN	NaN	0.92652	1.17694	1.13407	NaN	NaN	NaN	0.737345	1.10835	NaN	1.48284	1.61022	NaN	1.34107	NaN	NaN	NaN	NaN	1.41278	0.723695	1.23602	0.862952	1.94932	NaN	NaN	0.719795	1.08197	NaN	1.44754	1.30915	NaN	NaN	NaN	1.54347	1.35036	0.942784	NaN	NaN
NaN	-2.20455	-3.27214	-3.07458	-1.97704	-2.84865	NaN	-0.6127	-3.9473	-1.09341	-1.41282	0.201198	-1.29395	-2.41835	-1.801	-2.44342	NaN	-1.8198	NaN	-1.11445	-0.628013	-1.77519	-2.94929	-3.92282	NaN	-1.3444	NaN	-3.47738	-3.26743	-3.02733	NaN	-0.65113	-4.19489	-1.16199	-1.50143	-1.37511	NaN	-1.18435	-0.667404	-1.88653	-3.13428	-1.42873	-3.33839	-3.13683	-2.90632	NaN	-4.02721	-1.11555	-1.32015	-1.85664
NaN	-0.837297	-3.19261	-1.45259	-2.0853	-2.60552	-1.92218	-1.46232	-2.29868	-0.914013	-2.23232	-1.08836	-2.31392	-1.49564	-1.94273	-1.86615	-1.78385	-1.51767	NaN	-1.88853	-1.38847	-2.84777	-1.63197	-2.55218	NaN	-2.60634	NaN	-3.39286	-1.54371	-2.76895	-2.04275	-1.55405	-2.44286	-0.971343	-2.37233	-2.45905	NaN	-2.00699	-1.47556	-3.02639	-1.73433	-2.76982	-3.25725	-1.482	-2.65827	-1.9611	-2.34521	-0.932516	-2.36076	-1.5484
NaN	NaN	0.0679004	0.885321	0.557349	-0.066782	-0.000465868	1.12412	1.13481	0.737985	0.655335	0.904852	1.15792	0.833974	0.503297	0.601341	NaN	0.997012	NaN	0.905511	1.30968	0.760258	1.14729	0.84034	NaN	NaN	NaN	0.0662843	0.864249	-0.0709708	-0.000495089	1.09737	1.1078	0.720419	0.639737	1.13036	NaN	0.883959	1.2785	0.742163	1.11998	NaN	0.0724163	0.944201	-0.068134	-0.000475299	1.21028	0.787066	1.23493	1.06332
NaN	-0.171523	NaN	NaN	-0.277578	-0.535123	NaN	-0.225919	0.410456	0.235918	-0.388967	-1.97817	0.119636	NaN	-0.610337	-0.0559477	NaN	0.187344	-0.501668	NaN	-0.195318	NaN	0.101092	-0.624328	-0.69739	-0.23349	NaN	NaN	NaN	-0.568688	NaN	-0.240089	0.400686	0.230303	-0.413364	0.116788	-0.533135	NaN	-0.207569	NaN	0.0986862	-0.248135	NaN	NaN	-0.545956	NaN	0.437754	0.251608	0.127593	0.199804
-0.628021	-0.340971	-1.30164	0.383786	-0.389797	-0.0463377	0.21435	0.147976	-0.727556	-0.409935	-1.07578	0.571841	0.209534	0.332957	-0.744417	-0.650888	0.874138	-0.763861	-0.535134	0.187203	-0.49282	NaN	0.185183	-0.263335	-1.27176	NaN	-0.667413	-1.38328	0.374651	-0.0492442	0.209248	0.144454	-0.773191	-0.435648	-1.14326	0.204546	-0.5687	0.182748	-0.523732	NaN	0.180775	NaN	-1.32799	0.40931	-0.0472758	0.228606	-0.742285	-0.418234	0.223469	-0.779325
NaN	-2.7001	NaN	NaN	0.419694	-0.524717	-2.69249	-1.15995	-1.29056	NaN	0.788222	-0.909707	-2.81603	NaN	-1.68701	-1.36574	-1.05872	-2.65373	-1.0677	-1.68104	-2.19271	NaN	-2.50419	-1.81565	-3.33492	NaN	NaN	NaN	NaN	-0.557629	-2.86137	-1.23271	-1.37151	NaN	0.769461	-2.99266	-1.13467	-1.78648	-2.33024	NaN	-2.66126	NaN	NaN	NaN	-0.535339	-2.747	-1.31669	NaN	-2.87304	-2.70745
0.177248	-0.547807	-0.0286929	NaN	NaN	0.193553	-0.161943	-0.984736	-0.26434	-0.524757	-0.0323041	NaN	NaN	-0.458933	NaN	0.280781	-0.0753667	-0.628692	-0.196222	-0.679431	-0.761811	-0.216974	-0.323534	NaN	-0.331418	-0.217813	0.17303	-0.0304926	NaN	0.188947	-0.172101	-1.0465	-0.28092	-0.557672	-0.0343303	NaN	-0.20853	-0.722047	-0.809594	-0.230583	-0.343827	-0.231475	-0.0292738	NaN	0.206426	-0.165222	-0.269691	-0.53538	NaN	-0.641419
-0.392929	-0.175184	0.0909139	-0.31061	NaN	0.528298	0.0271994	-0.0260921	0.412086	0.00422077	0.621254	0.032111	0.248489	NaN	NaN	-0.372408	0.26003	-0.188183	0.625703	-0.101101	0.0861192	0.105788	0.280879	0.551344	0.204629	0.201515	-0.417575	0.08875	-0.330093	0.515724	0.026552	-0.0277286	0.402278	0.00412031	0.606468	0.242575	0.610811	-0.107443	0.0840694	0.10327	0.274194	0.196719	0.0969603	-0.316898	0.563434	0.0290084	0.439493	0.00450148	0.265016	-0.191993
NaN	NaN	NaN	-1.35772	-0.960735	0.409229	NaN	-0.429987	0.173416	-0.205773	-0.627643	NaN	NaN	-0.0910053	-0.344847	0.187403	NaN	NaN	NaN	NaN	0.0269455	NaN	NaN	-0.386883	NaN	NaN	NaN	NaN	-1.44288	0.399488	NaN	-0.456957	0.169288	-0.218679	-0.667011	NaN	NaN	NaN	0.0263042	NaN	NaN	NaN	NaN	-1.38521	0.436445	NaN	0.184949	-0.209938	NaN	NaN
NaN	-0.814729	-3.13694	NaN	-1.01462	-0.792531	-0.838738	-1.93311	-1.65092	-1.27356	-1.53851	-1.05608	NaN	-1.24608	-1.08677	-0.796176	NaN	-1.91115	NaN	-1.62582	-1.63974	NaN	-1.2738	NaN	NaN	NaN	NaN	-3.3337	NaN	-0.842241	-0.891347	-2.05436	-1.75447	-1.35344	-1.63502	NaN	NaN	-1.72779	-1.74259	NaN	-1.35369	NaN	-3.20044	NaN	-0.808575	-0.855718	-1.68434	-1.29934	NaN	-1.94984
NaN	NaN	-1.25985	NaN	-1.17976	-0.782305	-1.49327	-1.34108	-0.40528	-0.814416	-0.68696	-0.236532	-1.14497	NaN	-1.0099	-1.56858	NaN	NaN	NaN	NaN	-0.875774	NaN	-1.06988	-0.979756	-0.184252	-1.11991	NaN	-1.33887	NaN	-0.831374	-1.58694	-1.4252	-0.430701	-0.865498	-0.730048	-1.21678	NaN	NaN	-0.930706	NaN	-1.13699	-1.19015	-1.28536	NaN	-0.798142	-1.5235	-0.413485	-0.830903	-1.16814	NaN
-3.24376	-2.15055	-3.61858	-2.76452	-3.17938	-2.61841	-2.75885	-2.51668	-3.34662	-2.90681	-2.57964	-2.98997	-3.27805	-2.73981	-2.8836	-3.20732	-3.39172	-3.71571	-2.24339	-2.87946	-2.52807	-1.93305	-2.41983	-4.18698	-2.0655	-3.07408	-3.44722	-3.84555	-2.93791	-2.78265	-2.9319	-2.67454	-3.55653	-3.08913	-2.74145	-3.48366	-2.3841	-3.06007	-2.68664	-2.05429	-2.57161	-3.2669	-3.69184	-2.82048	-2.67142	-2.8147	-3.41437	-2.96565	-3.34441	-3.79093
NaN	0.561394	0.214824	0.582618	0.531375	0.0046657	0.428167	NaN	0.888802	0.573139	0.42458	0.367592	0.857264	0.72814	0.144091	NaN	NaN	0.855392	1.76835	0.642689	NaN	NaN	0.440928	0.853083	NaN	0.790656	NaN	0.209711	0.568751	0.00455465	0.417976	NaN	0.867647	0.559497	0.414474	0.83686	1.72626	0.627392	NaN	NaN	0.430433	0.771837	0.229111	0.621366	0.004976	0.456644	0.947914	0.611256	0.914278	0.912282
NaN	0.988844	2.30626	1.33686	1.10923	2.80967	NaN	1.29226	1.99534	0.994816	1.9669	0.151848	0.418963	1.00031	1.5591	1.45571	1.45807	0.417477	2.00745	1.32148	1.44056	NaN	2.1606	1.92629	NaN	1.2627	NaN	2.25137	1.30504	2.7428	NaN	1.2615	1.94785	0.971138	1.92009	0.408991	1.95967	1.29003	1.40627	NaN	2.10918	1.23264	2.45964	1.42577	2.99654	NaN	2.12804	1.06098	0.446827	0.445242
NaN	0.10758	0.20003	0.0801134	0.401609	0.305407	NaN	NaN	0.325206	-0.00165413	-0.06423	0.395613	0.465049	-0.170605	-0.0569739	0.0336838	0	0.312025	-0.628387	0.0310796	0.0365021	0.436041	0.030486	-0.0512744	NaN	0.0913143	NaN	0.195269	0.0782066	0.298138	NaN	NaN	0.317466	-0.00175788	-0.0682587	0.453981	-0.667801	0.0303399	0.0356333	0.425663	0.0297604	0.0891409	0.213333	0.0854415	0.325719	NaN	0.346835	-0.00168761	0.495978	0.332777
0.659376	0.0337612	0.0704082	0.0191995	0.562641	0.33091	0.137879	0.339754	0.0380117	-0.155359	-0.118936	0.340437	0.325657	-0.144021	-0.180063	-0.192486	0.0211103	0.272506	0.0845608	0.207327	0.0227106	0.344203	0.158735	0.145298	-0.156798	-0.0493887	0.643682	0.0687324	0.0187425	0.323034	0.134597	0.331668	0.037107	-0.165104	-0.126396	0.317906	0.0825481	0.202393	0.0221701	0.33601	0.154956	-0.0524865	0.0750909	0.0204764	0.352918	0.147048	0.0405398	-0.158504	0.347315	0.290629
NaN	-0.221695	-0.0566242	-0.456921	0.754224	1.14223	0.358645	-0.18263	-0.0484798	0.0802188	0.501894	0.380493	0.576408	0.321338	-0.766404	-0.174023	-1.19456	0.23989	0.393025	0.291985	0.0483776	NaN	0.310324	0.663238	0.00651754	-0.0133786	NaN	-0.0601759	-0.485581	1.11505	0.350109	-0.194085	-0.0515206	0.0783095	0.489948	0.562689	0.383671	0.285036	0.0472262	NaN	0.302938	-0.0142178	-0.0577705	-0.466171	1.2182	0.382498	-0.0494612	0.0855539	0.614743	0.255844
NaN	-0.696137	-0.0566242	-0.456921	0.754224	1.14223	0.358645	-0.18263	-0.0484798	0.0802188	0.501894	0.380493	0.576408	0.321338	-0.766404	-0.174023	-1.19456	0.23989	0.393025	0.291985	0.0483776	NaN	0.310324	0.663238	0.00651754	-0.0133786	NaN	-0.0601759	-0.485581	1.11505	0.350109	-0.194085	-0.0515206	0.0783095	0.489948	0.562689	0.383671	0.285036	0.0472262	NaN	0.302938	-0.0142178	-0.0577705	-0.466171	1.2182	0.382498	-0.0494612	0.0855539	0.614743	0.255844
NaN	0.676672	-0.298248	0.861779	0.7531	-0.0480942	0.821586	0.744554	-0.378092	0.575347	0.366786	-0.401108	0.355165	1.23634	NaN	0.966622	1.45176	0.267655	0.739261	0.50095	0.377436	0.737585	0.489258	0.0958269	0.984878	0.313777	NaN	-0.316955	0.841267	-0.0511108	0.802031	0.726832	-0.401807	0.561653	0.358056	0.346712	0.721666	0.489027	0.368453	0.720029	0.477613	0.306309	-0.304285	0.919093	-0.0490678	0.876227	-0.385746	0.613612	0.378786	0.285456
NaN	-1.83054	-2.19878	-3.00337	-3.25125	-2.44514	-1.57911	-2.26242	-1.22268	-1.56868	-2.42143	-1.77548	-2.36839	-1.70325	NaN	-1.47162	-2.40938	-1.97754	NaN	-1.67944	-1.82965	-2.27067	-2.06501	-3.10704	-1.7847	-2.56128	NaN	-2.33669	-3.19175	-2.5985	-1.67816	-2.40432	-1.29937	-1.66707	-2.57331	-2.51695	NaN	-1.78477	-1.94442	-2.41309	-2.19453	-2.72194	-2.24329	-3.06417	-2.49464	-1.61108	-1.24743	-1.60044	-2.41634	-2.01758
NaN	-0.380352	NaN	NaN	0.279605	0.673879	0.382677	-0.25894	-0.0595996	NaN	0.929977	NaN	-0.514688	0.0359311	NaN	0.358166	0.665925	-0.351453	0.105235	-0.799484	-0.308758	NaN	0.14694	0.261897	-0.0620647	-0.197231	NaN	NaN	NaN	0.657839	0.373569	-0.275182	-0.0633379	NaN	0.907842	-0.546971	0.10273	-0.84963	-0.328124	NaN	0.143443	-0.209602	NaN	NaN	0.718696	0.408128	-0.0608062	NaN	-0.525107	-0.358568
1.46418	0.385083	0.932884	NaN	0.887381	1.82391	NaN	0.148644	0.27305	0.219056	1.31802	-0.404703	0.162473	NaN	0.498235	0.8783	1.08629	NaN	0.681915	0.00285412	0.231797	NaN	0.295347	0.78878	0.655678	NaN	1.42933	0.91068	NaN	1.7805	NaN	0.145107	0.266551	0.213842	1.28665	0.158606	0.665685	0.00278618	0.22628	NaN	0.288317	NaN	0.994928	NaN	1.94521	NaN	0.291209	0.233624	0.173278	NaN
2.10442	0.112473	0.0716069	NaN	0.899543	0.813189	0.194324	-0.511045	NaN	NaN	1.12656	-1.02803	-0.246608	0.223668	0.202963	0.956505	0.553574	0.191401	NaN	-0.256597	-0.131688	-0.0742705	-0.0957778	NaN	0.534412	-0.237317	2.05433	0.0699026	NaN	0.793834	0.189699	-0.543099	NaN	NaN	1.09975	-0.262076	NaN	-0.272691	-0.139948	-0.078929	-0.101785	-0.252202	0.0763693	NaN	0.867272	0.207248	NaN	NaN	-0.251601	0.204131
NaN	-0.037664	NaN	0.0621275	-0.529999	-1.18306	0.136899	0.472403	-0.377357	-0.0561158	0.184565	0.0101865	0.377843	0.517721	NaN	-0.885067	0.186634	0.755073	-0.0301232	0.061847	0.159676	0.684185	-0.26054	-0.169348	0.79783	0.180225	NaN	NaN	0.0606488	-1.25726	0.13364	0.461159	-0.401026	-0.0596356	0.180172	0.36885	-0.0320126	0.0603749	0.155876	0.6679	-0.276882	0.175936	NaN	0.0662594	-1.20701	0.146003	-0.384996	-0.0572518	0.402972	0.805291
NaN	NaN	1.92647	0.520595	1.31968	NaN	1.49139	0.406936	0.778344	0.524003	2.03878	0.607349	0.771124	0.787165	1.26571	1.43255	NaN	0.558293	1.20943	0.322856	0.655568	NaN	0.817602	1.28838	1.61017	1.14493	NaN	1.88062	0.508204	NaN	1.4559	0.397251	0.759819	0.511531	1.99026	0.75277	1.18064	0.315171	0.639964	NaN	0.798142	1.11768	2.05459	0.555218	NaN	1.59058	0.83011	0.558853	0.822409	0.595423
NaN	-0.580908	-1.45065	-0.0763727	-0.470212	-0.797151	-0.908125	0.0622546	-0.851185	-0.430004	-0.670907	0.0704843	-0.162637	-0.372032	-0.936913	-1.27799	-0.494931	-0.266535	-1.05482	NaN	NaN	-0.269094	-0.514261	-0.349652	-0.50206	-0.510744	NaN	-1.54164	-0.081163	-0.847151	-0.965086	0.0607729	-0.904574	-0.456976	-0.712988	-0.172839	-1.12098	NaN	NaN	-0.285972	-0.546517	-0.542779	-1.48002	-0.0779188	-0.813289	-0.92651	-0.868416	-0.438709	-0.16593	-0.271931
NaN	-0.402988	NaN	-0.615361	0.280551	-0.347392	-1.05249	-0.148342	-0.155121	-0.0973924	-0.594984	0.265306	0.141349	-0.0783986	-1.03782	-0.824927	NaN	NaN	NaN	0.0453947	-0.375849	NaN	-0.079462	0.14882	NaN	-0.253958	NaN	NaN	-0.653959	-0.369182	-1.1185	-0.157647	-0.164851	-0.103501	-0.632303	0.137985	NaN	0.0443142	-0.399423	NaN	-0.0844461	-0.269887	NaN	-0.627819	-0.354425	-1.0738	-0.158261	-0.099364	0.15075	NaN
-0.352356	-0.485256	-0.565354	-1.54461	-0.487703	-0.341995	-0.774458	-0.81269	-0.334564	-1.80262	-0.35896	-0.19275	-0.89018	-0.445649	-1.20946	-0.640264	-0.47939	-0.66844	-1.40668	-0.941365	-1.34535	-0.990587	-0.915889	-0.169204	NaN	-0.550157	-0.374457	-0.600815	-1.64149	-0.363446	-0.823035	-0.863665	-0.355549	-1.91569	-0.381475	-0.946015	-1.49491	-1.00041	-1.42973	-1.05272	-0.973336	-0.584664	-0.576799	-1.57588	-0.348919	-0.790137	-0.341337	-1.83912	-0.908201	-0.681972
0.54144	0.103802	3.09e-05	-0.278393	0.171989	0.358926	0.00981075	-0.220809	0.125921	-0.590465	0.263441	-0.0972636	-0.153552	0.0962793	0.0421946	0.173026	-0.157644	-0.41882	-0.148845	-0.35091	-0.0855462	-0.386694	-0.0725841	0.170535	-0.0194599	0.0145587	0.528553	3.02e-05	-0.295855	0.350383	0.00957724	-0.234659	0.122924	-0.6275	0.257171	-0.163184	-0.158181	-0.37292	-0.0909119	-0.410949	-0.0771368	0.0142122	3.3e-05	-0.284029	0.382797	0.0104632	0.134296	-0.602418	-0.156661	-0.427298
NaN	0.362309	-0.0662645	0.0682906	-0.585972	-2.22953	NaN	0.583571	-0.55222	-0.377551	-0.78858	0.415608	0.033807	0.25184	0.455398	-0.62026	-0.599634	NaN	NaN	0.186303	-0.193067	NaN	-1.13366	-1.41479	NaN	NaN	NaN	-0.0704208	0.0666652	-2.36938	NaN	0.569681	-0.586857	-0.401232	-0.838043	0.0330024	NaN	0.181869	-0.205177	NaN	-1.20477	NaN	-0.067606	0.0728324	-2.27467	NaN	-0.563399	-0.385194	0.0360554	NaN
NaN	-0.890411	-0.681484	-1.19952	-0.598398	NaN	-0.55901	-1.05958	-0.434209	-1.27338	-0.281973	-0.872115	-1.19725	-0.433791	-0.614849	-0.141269	NaN	NaN	-0.963102	-0.445363	-1.11942	NaN	-0.637816	-0.490931	-0.416045	-0.789652	NaN	-0.724229	-1.27476	NaN	-0.594072	-1.12604	-0.461444	-1.35325	-0.299659	-1.27235	-1.02351	-0.473298	-1.18964	NaN	-0.677822	-0.839181	-0.69528	-1.2238	NaN	-0.570326	-0.443	-1.29916	-1.22149	NaN
[truncated: 2,188 more rows]
[truncated: 33 more columns]

## Sheet: Significant phosphosites (HSD)
REL_F	RELAPSE	REL_F_CN	RELAPSE_CN	REL_F_NPM1_MUT	RELAPSE_NPM1_MUT	Amino acid	Charge	Protein group IDs	Multiplicity	GOBP name	GOMF name	GOCC name	KEGG name	Motifs	ANOVA Significant	Localization prob	PEP	Score	Intensity	Intensity L	Intensity H	Position	Score diff	ANOVA p value	Proteins	Positions within proteins	Leading proteins	Protein	Protein names	Gene names	Sequence window	Phospho (STY) Probabilities	id	Significant pairs
[truncated: 294 more rows]
